# Supplementary material for: Untargeted pixel-by-pixel metabolite ratio imaging as a novel tool for biomedical discovery in mass spectrometry imaging
Source: eLife. 2025 Mar 18;13:RP96892. doi: 10.7554/eLife.96892 (PMC11919253; doi:10.7554/eLife.96892)
Supplement: Figure 1—figure supplement 2—source data 1. [file elife-96892-fig1-figsupp2-data1.xlsx]

## Sheet: fig71
spotId	raster	x	y	z	Date	LPE 18:1	LPE 18:1	Aspartate/Glutamine	Glutamine/Aspartate
0	0	3688	16226			357156	357156	0.79172	1.26307
1	0	3768	16226			364650	364650	0.966193	1.03499
2	0	3848	16226			541502	541502	0.912957	1.09534
3	0	3928	16226			475605	475605	1.00714	0.992906
4	0	4008	16226			559799	559799	0.789077	1.2673
5	0	4088	16226			726998	726998	0.938291	1.06577
6	0	4168	16226			535547	535547	0.955342	1.04675
7	0	4248	16226			509906	509906	1.21781	0.821147
8	0	4328	16226			614512	614512	1.02651	0.974179
9	0	4408	16226			676555	676555	1.13904	0.877929
10	0	4488	16226			664179	664179	1.00266	0.997348
11	0	4568	16226			688276	688276	1.13723	0.87933
12	0	4648	16226			300230	300230	1.23267	0.81125
13	0	4728	16226			142369	142369	1.46423	0.682952
14	0	4808	16226			105874	105874	1.10749	0.902944
15	0	4888	16226			0	1832.88	1.08248	0.923806
16	0	4968	16226			0	1832.88	1.52512	0.655686
17	0	5048	16226			0	1832.88	0.822852	1.21529
18	0	5128	16226			0	1832.88	1.14173	0.875862
19	0	5208	16226			0	1832.88	0.578737	1.7279
20	0	5288	16226			0	1832.88	0.0063252	158.098
21	0	5368	16226			0	1832.88	49.5723	0.0201725
22	0	5448	16226			0	1832.88	0.578737	1.7279
23	0	5528	16226			0	1832.88	0.791714	1.26308
24	0	5608	16226			0	1832.88	0.00623091	160.49
25	0	5688	16226			0	1832.88	0.578737	1.7279
26	0	5768	16226			0	1832.88	0.694731	1.43941
27	0	5848	16226			0	1832.88	0.578737	1.7279
28	0	3208	16146			435395	435395	1.04437	0.957519
29	0	3288	16146			495160	495160	1.22896	0.813696
30	0	3368	16146			479948	479948	0.916544	1.09105
31	0	3448	16146			410131	410131	1.05366	0.949069
32	0	3528	16146			482174	482174	1.12898	0.885758
33	0	3608	16146			500806	500806	1.14691	0.871909
34	0	3688	16146			442027	442027	1.05883	0.944436
35	0	3768	16146			489523	489523	0.997612	1.00239
36	0	3848	16146			538658	538658	0.912005	1.09649
37	0	3928	16146			611175	611175	1.25203	0.798705
38	0	4008	16146			827815	827815	1.15228	0.867844
39	0	4088	16146			705615	705615	1.01772	0.982589
40	0	4168	16146			931768	931768	0.990904	1.00918
41	0	4248	16146			828151	828151	1.06911	0.935358
42	0	4328	16146			865711	865711	1.31156	0.762448
43	0	4408	16146			925233	925233	0.894099	1.11844
44	0	4488	16146			847346	847346	1.02282	0.977689
45	0	4568	16146			661463	661463	1.13714	0.879395
46	0	4648	16146			696505	696505	1.0575	0.945626
47	0	4728	16146			1.10927e+06	1.10927e+06	1.00399	0.99603
48	0	4808	16146			459449	459449	1.03572	0.965515
49	0	4888	16146			555077	555077	0.982074	1.01825
50	0	4968	16146			294305	294305	1.2577	0.795102
51	0	5048	16146			781971	781971	1.1236	0.889998
52	0	5128	16146			766170	766170	1.13529	0.880832
53	0	5208	16146			861719	861719	1.11271	0.898708
54	0	5288	16146			660767	660767	1.47428	0.678299
55	0	5368	16146			631721	631721	1.07148	0.933285
56	0	5448	16146			723142	723142	1.03161	0.969355
57	0	5528	16146			804984	804984	1.0313	0.969653
58	0	5608	16146			815155	815155	1.38277	0.723186
59	0	5688	16146			661874	661874	1.16694	0.856944
60	0	5768	16146			575054	575054	0.977896	1.0226
61	0	5848	16146			372073	372073	0.952011	1.05041
62	0	5928	16146			289914	289914	1.00029	0.999711
63	0	6008	16146			190066	190066	0.685703	1.45836
64	0	6088	16146			185852	185852	0.886832	1.12761
65	0	6168	16146			0	1832.88	46.4261	0.0215396
66	0	6248	16146			0	1832.88	0.0071216	140.418
67	0	6328	16146			0	1832.88	0.578737	1.7279
68	0	6408	16146			0	1832.88	0.578737	1.7279
69	0	2728	16066			250115	250115	0.600481	1.66533
70	0	2808	16066			351266	351266	1.07837	0.927322
71	0	2888	16066			483302	483302	1.26015	0.793557
72	0	2968	16066			380642	380642	1.05996	0.943434
73	0	3048	16066			645780	645780	1.03368	0.967419
74	0	3128	16066			489684	489684	1.17864	0.848435
75	0	3208	16066			503626	503626	1.2085	0.82747
76	0	3288	16066			596068	596068	1.11309	0.898404
77	0	3368	16066			453975	453975	1.16487	0.858467
78	0	3448	16066			712638	712638	1.0782	0.927475
79	0	3528	16066			696636	696636	1.20257	0.831552
80	0	3608	16066			832952	832952	1.17808	0.848841
81	0	3688	16066			716552	716552	1.14467	0.873614
82	0	3768	16066			810469	810469	1.1094	0.901389
83	0	3848	16066			783539	783539	1.09565	0.9127
84	0	3928	16066			827101	827101	1.33877	0.746952
85	0	4008	16066			1.00973e+06	1.00973e+06	1.42223	0.70312
86	0	4088	16066			1.00978e+06	1.00978e+06	1.294	0.772796
87	0	4168	16066			1.21495e+06	1.21495e+06	1.53121	0.653078
88	0	4248	16066			1.43699e+06	1.43699e+06	1.16094	0.861373
89	0	4328	16066			1.23706e+06	1.23706e+06	1.45506	0.687257
90	0	4408	16066			1.26759e+06	1.26759e+06	1.16979	0.854851
91	0	4488	16066			1.00582e+06	1.00582e+06	1.28709	0.776948
92	0	4568	16066			1.00729e+06	1.00729e+06	1.03493	0.966249
93	0	4648	16066			1.06602e+06	1.06602e+06	1.07811	0.927551
94	0	4728	16066			878676	878676	0.965962	1.03524
95	0	4808	16066			1.58315e+06	1.58315e+06	1.27939	0.781625
96	0	4888	16066			1216500	1216500	1.2371	0.80834
97	0	4968	16066			910551	910551	1.26468	0.790711
98	0	5048	16066			982561	982561	1.35965	0.735484
99	0	5128	16066			964667	964667	1.20486	0.829974
100	0	5208	16066			1.01607e+06	1.01607e+06	1.21975	0.819839
101	0	5288	16066			1.01987e+06	1.01987e+06	1.258	0.794915
102	0	5368	16066			1157927	1157927	1.30231	0.767864
103	0	5448	16066			967213	967213	1.25738	0.795304
104	0	5528	16066			991965	991965	1.13823	0.878554
105	0	5608	16066			1.05472e+06	1.05472e+06	1.17519	0.850925
106	0	5688	16066			630320	630320	1.3809	0.724166
107	0	5768	16066			508728	508728	1.02408	0.976489
108	0	5848	16066			612324	612324	0.849889	1.17662
109	0	5928	16066			458997	458997	1.29421	0.772672
110	0	6008	16066			546190	546190	0.991256	1.00882
111	0	6088	16066			245599	245599	1.18217	0.845899
112	0	6168	16066			166336	166336	1.28158	0.780289
113	0	6248	16066			311909	311909	0.965616	1.03561
114	0	6328	16066			267557	267557	1.38026	0.724503
115	0	6408	16066			132954	132954	1.06774	0.936557
116	0	6488	16066			117048	117048	1.23364	0.81061
117	0	6568	16066			38357.7	38357.7	0.997018	1.00299
118	0	6648	16066			0	1832.88	2.20912	0.45267
119	0	6728	16066			0	1832.88	0.88135	1.13462
120	0	6808	16066			43399.8	43399.8	0.692663	1.4437
121	0	6888	16066			0	1832.88	1.62102	0.616896
122	0	6968	16066			0	1832.88	1.05806	0.945124
123	0	2248	15986			233908	233908	1.23465	0.809944
124	0	2328	15986			452989	452989	0.868402	1.15154
125	0	2408	15986			328405	328405	0.798281	1.25269
126	0	2488	15986			332669	332669	1.18151	0.846378
127	0	2568	15986			567963	567963	1.16807	0.856114
128	0	2648	15986			530861	530861	1.07535	0.929932
129	0	2728	15986			615430	615430	1.18896	0.841072
130	0	2808	15986			449200	449200	1.1712	0.853826
131	0	2888	15986			574796	574796	1.37829	0.725537
132	0	2968	15986			595009	595009	1.19285	0.838327
133	0	3048	15986			973328	973328	1.16532	0.858137
134	0	3128	15986			842331	842331	1.47639	0.677328
135	0	3208	15986			945399	945399	1.22711	0.81492
136	0	3288	15986			810949	810949	1.53281	0.652396
137	0	3368	15986			851031	851031	1.54527	0.647136
138	0	3448	15986			846160	846160	1.38311	0.72301
139	0	3528	15986			937084	937084	1.16507	0.858315
140	0	3608	15986			821394	821394	1.00756	0.992496
141	0	3688	15986			920575	920575	1.32524	0.754579
142	0	3768	15986			1.09436e+06	1.09436e+06	1.43157	0.698533
143	0	3848	15986			1.14215e+06	1.14215e+06	1.28533	0.778008
144	0	3928	15986			972550	972550	1.53928	0.649654
145	0	4008	15986			967919	967919	1.41818	0.705129
146	0	4088	15986			1.30967e+06	1.30967e+06	1.47257	0.679084
147	0	4168	15986			1.50936e+06	1.50936e+06	1.37411	0.727744
148	0	4248	15986			1.60052e+06	1.60052e+06	1.44854	0.690348
149	0	4328	15986			1.63982e+06	1.63982e+06	1.4118	0.708316
150	0	4408	15986			1.84332e+06	1.84332e+06	1.3368	0.748057
151	0	4488	15986			2.01875e+06	2.01875e+06	1.59958	0.625165
152	0	4568	15986			1.32576e+06	1.32576e+06	1.11728	0.895028
153	0	4648	15986			1.2421e+06	1.2421e+06	1.49668	0.668148
154	0	4728	15986			1.29945e+06	1.29945e+06	1.4847	0.673539
155	0	4808	15986			1.64846e+06	1.64846e+06	1.41367	0.707376
156	0	4888	15986			1.70792e+06	1.70792e+06	1.58506	0.630892
157	0	4968	15986			967098	967098	1.30425	0.766723
158	0	5048	15986			1.32145e+06	1.32145e+06	1.42676	0.700888
159	0	5128	15986			1.48977e+06	1.48977e+06	1.38509	0.721976
160	0	5208	15986			1.69331e+06	1.69331e+06	1.28618	0.777495
161	0	5288	15986			1.24919e+06	1.24919e+06	1.28323	0.779285
162	0	5368	15986			1231522	1231522	1.18276	0.845479
163	0	5448	15986			1.53349e+06	1.53349e+06	1.13579	0.880443
164	0	5528	15986			1.51197e+06	1.51197e+06	1.49732	0.667861
165	0	5608	15986			913425	913425	1.14995	0.8696
166	0	5688	15986			891747	891747	1.3678	0.7311
167	0	5768	15986			884293	884293	1.04658	0.95549
168	0	5848	15986			879382	879382	1.16549	0.858005
169	0	5928	15986			679541	679541	0.967189	1.03392
170	0	6008	15986			645006	645006	1.27504	0.784288
171	0	6088	15986			847556	847556	0.907006	1.10253
172	0	6168	15986			492112	492112	1.06143	0.942128
173	0	6248	15986			683890	683890	0.990112	1.00999
174	0	6328	15986			475565	475565	1.05525	0.94764
175	0	6408	15986			503991	503991	1.18765	0.842
176	0	6488	15986			562714	562714	1.04328	0.958516
177	0	6568	15986			421672	421672	0.925204	1.08084
178	0	6648	15986			443752	443752	0.700195	1.42817
179	0	6728	15986			367253	367253	0.686388	1.4569
180	0	6808	15986			251983	251983	0.878565	1.13822
181	0	6888	15986			216719	216719	1.00577	0.994262
182	0	6968	15986			210769	210769	0.881542	1.13438
183	0	7048	15986			84523.1	84523.1	0.902581	1.10793
184	0	7128	15986			68903.2	68903.2	0.87994	1.13644
185	0	7208	15986			0	1832.88	0.578737	1.7279
186	0	1848	15906			0	1832.88	0.857313	1.16643
187	0	1928	15906			85936.5	85936.5	1.00745	0.992607
188	0	2008	15906			272166	272166	1.22417	0.816878
189	0	2088	15906			210458	210458	1.14559	0.872913
190	0	2168	15906			364273	364273	1.17114	0.853866
191	0	2248	15906			716813	716813	0.996102	1.00391
192	0	2328	15906			605030	605030	1.48851	0.671812
193	0	2408	15906			452497	452497	1.02008	0.980316
194	0	2488	15906			668781	668781	1.1184	0.894138
195	0	2568	15906			449985	449985	1.16961	0.854983
196	0	2648	15906			380214	380214	0.880214	1.13609
197	0	2728	15906			271688	271688	1.38168	0.723756
198	0	2808	15906			844533	844533	1.09313	0.914806
199	0	2888	15906			857143	857143	1.25492	0.796861
200	0	2968	15906			993885	993885	1.12254	0.890841
201	0	3048	15906			814123	814123	1.3513	0.740027
202	0	3128	15906			1.2374e+06	1.2374e+06	1.35394	0.738586
203	0	3208	15906			1.11823e+06	1.11823e+06	1.35616	0.737376
204	0	3288	15906			1.13607e+06	1.13607e+06	1.26093	0.793068
205	0	3368	15906			920998	920998	1.36886	0.730534
206	0	3448	15906			1.01901e+06	1.01901e+06	1.39348	0.717629
207	0	3528	15906			939693	939693	1.06524	0.938759
208	0	3608	15906			776115	776115	1.18076	0.846915
209	0	3688	15906			982813	982813	1.34785	0.74192
210	0	3768	15906			951913	951913	1.2128	0.824535
211	0	3848	15906			1.42966e+06	1.42966e+06	1.26058	0.793284
212	0	3928	15906			1.04099e+06	1.04099e+06	1.3797	0.724797
213	0	4008	15906			1.71574e+06	1.71574e+06	1.25463	0.797047
214	0	4088	15906			1.82579e+06	1.82579e+06	1.20429	0.830365
215	0	4168	15906			2.45591e+06	2.45591e+06	1.10094	0.908312
216	0	4248	15906			2.58917e+06	2.58917e+06	1.40218	0.713176
217	0	4328	15906			2.26358e+06	2.26358e+06	1.20918	0.827006
218	0	4408	15906			2.12562e+06	2.12562e+06	1.27794	0.782508
219	0	4488	15906			1.78962e+06	1.78962e+06	1.23824	0.8076
220	0	4568	15906			2111692	2111692	1.44135	0.693796
221	0	4648	15906			1.6321e+06	1.6321e+06	1.25661	0.795789
222	0	4728	15906			1.32851e+06	1.32851e+06	1.70601	0.586165
223	0	4808	15906			1532577	1532577	1.38352	0.722796
224	0	4888	15906			1.44517e+06	1.44517e+06	1.30697	0.765131
225	0	4968	15906			1.21052e+06	1.21052e+06	1.12631	0.887852
226	0	5048	15906			1.23126e+06	1.23126e+06	1.4705	0.680043
227	0	5128	15906			1919787	1919787	1.41482	0.706803
228	0	5208	15906			1770781	1770781	1.79742	0.556352
229	0	5288	15906			2.38628e+06	2.38628e+06	1.31167	0.762387
230	0	5368	15906			2.52891e+06	2.52891e+06	1.73181	0.577432
231	0	5448	15906			2.01078e+06	2.01078e+06	2.02122	0.49475
232	0	5528	15906			1.86624e+06	1.86624e+06	1.30195	0.768078
233	0	5608	15906			1.43896e+06	1.43896e+06	1.31116	0.762685
234	0	5688	15906			1.26244e+06	1.26244e+06	1.23466	0.809939
235	0	5768	15906			1.25829e+06	1.25829e+06	1.4999	0.666709
236	0	5848	15906			1.03884e+06	1.03884e+06	1.74306	0.573705
237	0	5928	15906			1.06521e+06	1.06521e+06	1.12968	0.885205
238	0	6008	15906			781359	781359	1.17769	0.849123
239	0	6088	15906			1.05702e+06	1.05702e+06	0.960317	1.04132
240	0	6168	15906			868831	868831	1.19172	0.83912
241	0	6248	15906			896009	896009	0.971437	1.0294
242	0	6328	15906			853711	853711	1.2534	0.79783
243	0	6408	15906			820620	820620	0.751138	1.33131
244	0	6488	15906			785177	785177	1.23467	0.809935
245	0	6568	15906			754302	754302	1.03647	0.964814
246	0	6648	15906			556354	556354	1.37796	0.72571
247	0	6728	15906			568009	568009	0.982008	1.01832
248	0	6808	15906			540130	540130	0.888532	1.12545
249	0	6888	15906			521917	521917	0.912358	1.09606
250	0	6968	15906			509024	509024	1.20908	0.827076
251	0	7048	15906			435218	435218	1.28928	0.775625
252	0	7128	15906			328526	328526	0.901403	1.10938
253	0	7208	15906			216295	216295	1.05915	0.944152
254	0	7288	15906			94330.5	94330.5	0.961705	1.03982
255	0	7368	15906			0	1832.88	68.5944	0.0145785
256	0	1688	15826			320551	320551	0.838859	1.1921
257	0	1768	15826			376109	376109	1.23953	0.806757
258	0	1848	15826			387341	387341	0.972383	1.0284
259	0	1928	15826			130658	130658	0.862608	1.15927
260	0	2008	15826			651674	651674	1.18255	0.845628
261	0	2088	15826			661938	661938	1.50452	0.664663
262	0	2168	15826			542946	542946	1.01248	0.987673
263	0	2248	15826			878863	878863	1.38976	0.719551
264	0	2328	15826			867724	867724	1.08968	0.9177
265	0	2408	15826			859557	859557	1.55971	0.641147
266	0	2488	15826			872320	872320	1.13233	0.883136
267	0	2568	15826			866523	866523	1.08625	0.9206
268	0	2648	15826			512997	512997	1.11088	0.900189
269	0	2728	15826			489573	489573	0.98074	1.01964
270	0	2808	15826			829945	829945	1.29875	0.769972
271	0	2888	15826			1.15986e+06	1.15986e+06	1.34593	0.742978
272	0	2968	15826			1.08254e+06	1.08254e+06	1.45739	0.686156
273	0	3048	15826			1.21967e+06	1.21967e+06	1.29665	0.771219
274	0	3128	15826			1.15766e+06	1.15766e+06	1.29199	0.773999
275	0	3208	15826			1.03808e+06	1.03808e+06	1.49198	0.67025
276	0	3288	15826			1.44992e+06	1.44992e+06	1.56109	0.64058
277	0	3368	15826			1.33291e+06	1.33291e+06	1.34481	0.743602
278	0	3448	15826			1.27034e+06	1.27034e+06	1.39272	0.718017
279	0	3528	15826			1.14739e+06	1.14739e+06	1.11148	0.899703
280	0	3608	15826			1.23793e+06	1.23793e+06	1.33662	0.748155
281	0	3688	15826			1.14978e+06	1.14978e+06	1.40439	0.712052
282	0	3768	15826			882224	882224	1.4385	0.695167
283	0	3848	15826			1.54073e+06	1.54073e+06	1.13896	0.877994
284	0	3928	15826			1.60066e+06	1.60066e+06	1.50864	0.662848
285	0	4008	15826			1.66587e+06	1.66587e+06	1.61701	0.618425
286	0	4088	15826			2276005	2276005	1.40927	0.709588
287	0	4168	15826			2.33043e+06	2.33043e+06	1.18662	0.842733
288	0	4248	15826			2.91366e+06	2.91366e+06	1.25546	0.796519
289	0	4328	15826			2.83849e+06	2.83849e+06	1.31848	0.758448
290	0	4408	15826			2.74785e+06	2.74785e+06	1.4933	0.669658
291	0	4488	15826			2372707	2372707	1.5882	0.629642
292	0	4568	15826			1.98687e+06	1.98687e+06	1.37793	0.725725
293	0	4648	15826			1.62171e+06	1.62171e+06	1.47194	0.679374
294	0	4728	15826			1459756	1459756	1.36519	0.732498
295	0	4808	15826			1.86842e+06	1.86842e+06	1.33477	0.749192
296	0	4888	15826			1.61349e+06	1.61349e+06	1.61636	0.618676
297	0	4968	15826			1.26333e+06	1.26333e+06	1.40379	0.712358
298	0	5048	15826			1.65425e+06	1.65425e+06	1.53035	0.653444
299	0	5128	15826			1185341	1185341	1.58088	0.63256
300	0	5208	15826			2.24785e+06	2.24785e+06	1.32508	0.754674
301	0	5288	15826			2524357	2524357	1.75135	0.570988
302	0	5368	15826			2.61494e+06	2.61494e+06	1.40367	0.712416
303	0	5448	15826			2.3263e+06	2.3263e+06	1.59664	0.626317
304	0	5528	15826			1.81174e+06	1.81174e+06	1.43263	0.698015
305	0	5608	15826			1.83649e+06	1.83649e+06	1.55161	0.644493
306	0	5688	15826			1.61918e+06	1.61918e+06	1.83203	0.545843
307	0	5768	15826			1.84499e+06	1.84499e+06	1.29848	0.770129
308	0	5848	15826			1.82096e+06	1.82096e+06	1.45077	0.68929
309	0	5928	15826			1.65895e+06	1.65895e+06	1.26051	0.793328
310	0	6008	15826			1.50043e+06	1.50043e+06	1.72316	0.580329
311	0	6088	15826			1.40552e+06	1.40552e+06	1.28292	0.779471
312	0	6168	15826			1.187e+06	1.187e+06	1.16212	0.860494
313	0	6248	15826			1.15052e+06	1.15052e+06	1.14902	0.870305
314	0	6328	15826			1.35014e+06	1.35014e+06	1.20268	0.831478
315	0	6408	15826			1060830	1060830	1.0152	0.985026
316	0	6488	15826			998535	998535	1.12363	0.889971
317	0	6568	15826			848869	848869	1.13549	0.880674
318	0	6648	15826			918375	918375	0.957184	1.04473
319	0	6728	15826			751568	751568	1.08637	0.9205
320	0	6808	15826			821429	821429	1.11482	0.897005
321	0	6888	15826			593635	593635	1.35311	0.739039
322	0	6968	15826			567876	567876	1.11388	0.897762
323	0	7048	15826			493149	493149	0.87823	1.13865
324	0	7128	15826			506917	506917	0.682811	1.46453
325	0	7208	15826			448161	448161	1.0889	0.918358
326	0	7288	15826			331679	331679	1.02541	0.975222
327	0	7368	15826			260495	260495	0.748453	1.33609
328	0	7448	15826			164771	164771	0.87921	1.13738
329	0	1608	15746			141743	141743	0.993404	1.00664
330	0	1688	15746			429129	429129	0.955944	1.04609
331	0	1768	15746			629160	629160	1.41635	0.706039
332	0	1848	15746			654917	654917	1.11839	0.894143
333	0	1928	15746			523567	523567	0.9045	1.10558
334	0	2008	15746			880482	880482	1.09569	0.912665
335	0	2088	15746			909210	909210	1.29088	0.774667
336	0	2168	15746			950462	950462	1.48788	0.672098
337	0	2248	15746			976452	976452	1.30893	0.76398
338	0	2328	15746			1.02549e+06	1.02549e+06	1.33585	0.748586
339	0	2408	15746			1.30977e+06	1.30977e+06	1.45472	0.687417
340	0	2488	15746			1.41367e+06	1.41367e+06	1.1476	0.871383
341	0	2568	15746			1.08479e+06	1.08479e+06	1.13551	0.880662
342	0	2648	15746			576891	576891	1.00613	0.993903
343	0	2728	15746			613253	613253	0.88093	1.13516
344	0	2808	15746			1.29044e+06	1.29044e+06	1.17822	0.848739
345	0	2888	15746			1.20345e+06	1.20345e+06	1.22217	0.818217
346	0	2968	15746			1.61109e+06	1.61109e+06	1.47894	0.676162
347	0	3048	15746			1.45324e+06	1.45324e+06	1.30129	0.768467
348	0	3128	15746			1.51873e+06	1.51873e+06	1.27097	0.786799
349	0	3208	15746			1.95451e+06	1.95451e+06	1.28715	0.776907
350	0	3288	15746			1.6757e+06	1.6757e+06	1.2736	0.785177
351	0	3368	15746			1.73143e+06	1.73143e+06	1.42431	0.702092
352	0	3448	15746			1.53048e+06	1.53048e+06	1.26269	0.791958
353	0	3528	15746			1.46549e+06	1.46549e+06	1.2491	0.800576
354	0	3608	15746			1.65623e+06	1.65623e+06	1.25498	0.796826
355	0	3688	15746			1.47917e+06	1.47917e+06	1.40772	0.710367
356	0	3768	15746			1707876	1707876	1.41971	0.704371
357	0	3848	15746			1.7177e+06	1.7177e+06	1.2561	0.796114
358	0	3928	15746			1.9788e+06	1.9788e+06	1.33989	0.746329
359	0	4008	15746			1.92194e+06	1.92194e+06	1.67647	0.596491
360	0	4088	15746			3.58463e+06	3.58463e+06	1.39783	0.715394
361	0	4168	15746			3.46608e+06	3.46608e+06	1.34086	0.745792
362	0	4248	15746			2840191	2840191	1.13955	0.877537
363	0	4328	15746			3.61438e+06	3.61438e+06	1.47336	0.678719
364	0	4408	15746			3.174e+06	3.174e+06	1.29511	0.772137
365	0	4488	15746			2342430	2342430	1.43655	0.696113
366	0	4568	15746			2.17574e+06	2.17574e+06	1.46386	0.683124
367	0	4648	15746			2.07772e+06	2.07772e+06	1.31099	0.762783
368	0	4728	15746			1.30444e+06	1.30444e+06	1.71565	0.582868
369	0	4808	15746			1802798	1802798	1.28132	0.780443
370	0	4888	15746			1992077	1992077	1.68104	0.594869
371	0	4968	15746			1.5322e+06	1.5322e+06	1.46776	0.681312
372	0	5048	15746			1.72155e+06	1.72155e+06	1.79322	0.557657
373	0	5128	15746			1.48891e+06	1.48891e+06	1.58026	0.632807
374	0	5208	15746			1.96433e+06	1.96433e+06	1.64284	0.608702
375	0	5288	15746			2.41855e+06	2.41855e+06	1.44477	0.692154
376	0	5368	15746			3.00453e+06	3.00453e+06	1.64156	0.609178
377	0	5448	15746			3.2805e+06	3.2805e+06	1.40332	0.712594
378	0	5528	15746			3.72919e+06	3.72919e+06	1.34948	0.741027
379	0	5608	15746			3.22398e+06	3.22398e+06	1.16008	0.862012
380	0	5688	15746			2.58628e+06	2.58628e+06	1.60763	0.622035
381	0	5768	15746			2.39354e+06	2.39354e+06	1.42039	0.704033
382	0	5848	15746			1542998	1542998	1.49876	0.66722
383	0	5928	15746			1618997	1618997	1.40946	0.709491
384	0	6008	15746			1.19456e+06	1.19456e+06	1.20254	0.831571
385	0	6088	15746			2.13255e+06	2.13255e+06	1.35869	0.736003
386	0	6168	15746			1.71369e+06	1.71369e+06	1.21911	0.82027
387	0	6248	15746			1.3045e+06	1.3045e+06	0.91218	1.09628
388	0	6328	15746			1.15513e+06	1.15513e+06	0.894641	1.11777
389	0	6408	15746			1.27992e+06	1.27992e+06	1.20471	0.830076
390	0	6488	15746			1.3401e+06	1.3401e+06	1.13844	0.878393
391	0	6568	15746			1.47131e+06	1.47131e+06	1.47523	0.677859
392	0	6648	15746			1.05474e+06	1.05474e+06	0.938867	1.06511
393	0	6728	15746			843996	843996	1.01379	0.986402
394	0	6808	15746			1.06553e+06	1.06553e+06	1.35079	0.740305
395	0	6888	15746			872256	872256	1.44275	0.693123
396	0	6968	15746			818796	818796	1.28873	0.775956
397	0	7048	15746			763058	763058	1.225	0.816325
398	0	7128	15746			672240	672240	1.28951	0.77549
399	0	7208	15746			572384	572384	0.929152	1.07625
400	0	7288	15746			661300	661300	1.38678	0.721092
401	0	7368	15746			579427	579427	1.4229	0.702791
402	0	7448	15746			413908	413908	1.21637	0.82212
403	0	7528	15746			353570	353570	0.898088	1.11348
404	0	7608	15746			233680	233680	1.04509	0.956858
405	0	1528	15666			439685	439685	0.858713	1.16453
406	0	1608	15666			594340	594340	1.1706	0.854259
407	0	1688	15666			622714	622714	1.39802	0.715297
408	0	1768	15666			834862	834862	1.34415	0.743963
409	0	1848	15666			1.09089e+06	1.09089e+06	1.20335	0.83101
410	0	1928	15666			1130523	1130523	1.29982	0.769339
411	0	2008	15666			1.05183e+06	1.05183e+06	1.41745	0.705494
412	0	2088	15666			1.27066e+06	1.27066e+06	1.25708	0.795491
413	0	2168	15666			1.69683e+06	1.69683e+06	1.34428	0.743891
414	0	2248	15666			1.84746e+06	1.84746e+06	1.31936	0.757943
415	0	2328	15666			2.05935e+06	2.05935e+06	1.15899	0.862821
416	0	2408	15666			1.45401e+06	1.45401e+06	1.24932	0.800436
417	0	2488	15666			1.19459e+06	1.19459e+06	1.31497	0.760474
418	0	2568	15666			940791	940791	1.11939	0.893347
419	0	2648	15666			378150	378150	0.78805	1.26895
420	0	2728	15666			314385	314385	0.68687	1.45588
421	0	2808	15666			1.29988e+06	1.29988e+06	0.971828	1.02899
422	0	2888	15666			1.37002e+06	1.37002e+06	1.13243	0.883058
423	0	2968	15666			1.59936e+06	1.59936e+06	1.18821	0.841604
424	0	3048	15666			1614596	1614596	1.21788	0.821098
425	0	3128	15666			1859569	1859569	1.42274	0.70287
426	0	3208	15666			1.89512e+06	1.89512e+06	1.39364	0.717546
427	0	3288	15666			2.12512e+06	2.12512e+06	1.37137	0.729197
428	0	3368	15666			1.5586e+06	1.5586e+06	1.29705	0.770979
429	0	3448	15666			1.75057e+06	1.75057e+06	1.29112	0.77452
430	0	3528	15666			1.64681e+06	1.64681e+06	1.28678	0.777134
431	0	3608	15666			1.821e+06	1.821e+06	1.30387	0.76695
432	0	3688	15666			1.70384e+06	1.70384e+06	1.44455	0.692258
433	0	3768	15666			1.87863e+06	1.87863e+06	1.12312	0.890375
434	0	3848	15666			1.69405e+06	1.69405e+06	1.26795	0.788673
435	0	3928	15666			2918510	2918510	1.2688	0.788147
436	0	4008	15666			2.87899e+06	2.87899e+06	1.19093	0.839678
437	0	4088	15666			3.78696e+06	3.78696e+06	1.36535	0.732411
438	0	4168	15666			5.35386e+06	5.35386e+06	1.31963	0.757791
439	0	4248	15666			4.02094e+06	4.02094e+06	1.35087	0.740265
440	0	4328	15666			3.98275e+06	3.98275e+06	1.34323	0.744476
441	0	4408	15666			3.71325e+06	3.71325e+06	1.55233	0.644194
442	0	4488	15666			2.32596e+06	2.32596e+06	1.40981	0.709314
443	0	4568	15666			2.36324e+06	2.36324e+06	1.33882	0.746925
444	0	4648	15666			1.79843e+06	1.79843e+06	1.32238	0.756211
445	0	4728	15666			1.94491e+06	1.94491e+06	1.85665	0.538604
446	0	4808	15666			2.26551e+06	2.26551e+06	1.36792	0.731038
447	0	4888	15666			1.84877e+06	1.84877e+06	1.66668	0.599995
448	0	4968	15666			1.60997e+06	1.60997e+06	1.51212	0.661321
449	0	5048	15666			2.04532e+06	2.04532e+06	1.30842	0.764282
450	0	5128	15666			1.99654e+06	1.99654e+06	1.34046	0.746013
451	0	5208	15666			2.7488e+06	2.7488e+06	1.30608	0.765649
452	0	5288	15666			3.01364e+06	3.01364e+06	1.49117	0.670615
453	0	5368	15666			3.41023e+06	3.41023e+06	1.27043	0.787134
454	0	5448	15666			4199170	4199170	1.71167	0.584224
455	0	5528	15666			3.9518e+06	3.9518e+06	1.47715	0.676978
456	0	5608	15666			3.89075e+06	3.89075e+06	1.35164	0.739842
457	0	5688	15666			3.37423e+06	3.37423e+06	1.36039	0.735085
458	0	5768	15666			2670019	2670019	1.45115	0.689107
459	0	5848	15666			1980265	1980265	1.35093	0.740233
460	0	5928	15666			1.98034e+06	1.98034e+06	1.49099	0.670696
461	0	6008	15666			1.75695e+06	1.75695e+06	1.32415	0.7552
462	0	6088	15666			1.24184e+06	1.24184e+06	1.15861	0.863106
463	0	6168	15666			1.35322e+06	1.35322e+06	1.38759	0.720672
464	0	6248	15666			1.21812e+06	1.21812e+06	0.919551	1.08749
465	0	6328	15666			208784	208784	0.722018	1.38501
466	0	6408	15666			1.16083e+06	1.16083e+06	1.11506	0.896811
467	0	6488	15666			1.4463e+06	1.4463e+06	1.01692	0.983358
468	0	6568	15666			1.52732e+06	1.52732e+06	1.13898	0.877977
469	0	6648	15666			1.34522e+06	1.34522e+06	1.21079	0.825904
470	0	6728	15666			1.4542e+06	1.4542e+06	1.14172	0.875869
471	0	6808	15666			1.16574e+06	1.16574e+06	1.11083	0.900226
472	0	6888	15666			1.30658e+06	1.30658e+06	1.31594	0.759914
473	0	6968	15666			1.22775e+06	1.22775e+06	1.46983	0.680352
474	0	7048	15666			1.00805e+06	1.00805e+06	1.18543	0.843578
475	0	7128	15666			810282	810282	1.24134	0.80558
476	0	7208	15666			700423	700423	0.982249	1.01807
477	0	7288	15666			604322	604322	1.19194	0.83897
478	0	7368	15666			569998	569998	1.95122	0.512501
479	0	7448	15666			676434	676434	1.32599	0.754153
480	0	7528	15666			638162	638162	1.52242	0.656848
481	0	7608	15666			614080	614080	1.25569	0.796376
482	0	7688	15666			414842	414842	1.38474	0.722157
483	0	7768	15666			284461	284461	1.49442	0.669156
484	0	1528	15586			458466	458466	0.947157	1.05579
485	0	1608	15586			441682	441682	1.02835	0.972432
486	0	1688	15586			874568	874568	1.29699	0.771014
487	0	1768	15586			1.15756e+06	1.15756e+06	1.45832	0.685719
488	0	1848	15586			1.26016e+06	1.26016e+06	1.57478	0.635011
489	0	1928	15586			1.60632e+06	1.60632e+06	1.58926	0.629223
490	0	2008	15586			1.14262e+06	1.14262e+06	1.5017	0.665914
491	0	2088	15586			1.58096e+06	1.58096e+06	1.24139	0.80555
492	0	2168	15586			1478568	1478568	1.67353	0.597539
493	0	2248	15586			2.10502e+06	2.10502e+06	1.23429	0.810179
494	0	2328	15586			1.79577e+06	1.79577e+06	1.31017	0.763261
495	0	2408	15586			1.75423e+06	1.75423e+06	1.03393	0.967186
496	0	2488	15586			900634	900634	1.03295	0.968103
497	0	2568	15586			1.19033e+06	1.19033e+06	1.18205	0.845988
498	0	2648	15586			1116083	1116083	1.00219	0.997812
499	0	2728	15586			970024	970024	0.982334	1.01798
500	0	2808	15586			1610619	1610619	1.2085	0.827471
501	0	2888	15586			1.70884e+06	1.70884e+06	1.16093	0.861377
502	0	2968	15586			2.017e+06	2.017e+06	1.13042	0.884629
503	0	3048	15586			2.33017e+06	2.33017e+06	1.37924	0.725036
504	0	3128	15586			2400167	2400167	1.28279	0.779552
505	0	3208	15586			2.90583e+06	2.90583e+06	1.42585	0.701335
506	0	3288	15586			2.32481e+06	2.32481e+06	1.29615	0.771515
507	0	3368	15586			2.16899e+06	2.16899e+06	1.05386	0.948893
508	0	3448	15586			2.16795e+06	2.16795e+06	1.22171	0.818526
509	0	3528	15586			2.34211e+06	2.34211e+06	0.968845	1.03216
510	0	3608	15586			2.32684e+06	2.32684e+06	1.47746	0.676837
511	0	3688	15586			2.59754e+06	2.59754e+06	1.25071	0.799544
512	0	3768	15586			2.54766e+06	2.54766e+06	1.39812	0.715247
513	0	3848	15586			2.16156e+06	2.16156e+06	1.25309	0.79803
514	0	3928	15586			3.3033e+06	3.3033e+06	1.3211	0.756943
515	0	4008	15586			4.6499e+06	4.6499e+06	1.34442	0.743817
516	0	4088	15586			4895977	4895977	1.42976	0.699417
517	0	4168	15586			4374164	4374164	1.32755	0.753265
518	0	4248	15586			4.60249e+06	4.60249e+06	1.2396	0.806713
519	0	4328	15586			3.65175e+06	3.65175e+06	1.37182	0.728958
520	0	4408	15586			2715881	2715881	1.45131	0.689034
521	0	4488	15586			2.61447e+06	2.61447e+06	1.65792	0.603164
522	0	4568	15586			2.18784e+06	2.18784e+06	1.37152	0.729121
523	0	4648	15586			2046271	2046271	1.39337	0.717686
524	0	4728	15586			1.76704e+06	1.76704e+06	1.48679	0.67259
525	0	4808	15586			1.91782e+06	1.91782e+06	1.33853	0.747089
526	0	4888	15586			1.6873e+06	1.6873e+06	1.59433	0.627224
527	0	4968	15586			2.04136e+06	2.04136e+06	1.54511	0.647201
528	0	5048	15586			2.71191e+06	2.71191e+06	1.71169	0.584218
529	0	5128	15586			2.08187e+06	2.08187e+06	1.66805	0.599503
530	0	5208	15586			2.41719e+06	2.41719e+06	1.54432	0.647536
531	0	5288	15586			2548754	2548754	1.41507	0.706677
532	0	5368	15586			4.03e+06	4.03e+06	1.33502	0.749053
533	0	5448	15586			4640645	4640645	1.2417	0.80535
534	0	5528	15586			5.21903e+06	5.21903e+06	1.31129	0.762607
535	0	5608	15586			4840350	4840350	1.33167	0.750934
536	0	5688	15586			4.01728e+06	4.01728e+06	1.37228	0.728713
537	0	5768	15586			2.82625e+06	2.82625e+06	1.14283	0.875019
538	0	5848	15586			2.63755e+06	2.63755e+06	1.20614	0.829088
539	0	5928	15586			2.65077e+06	2.65077e+06	1.537	0.650618
540	0	6008	15586			2176304	2176304	1.10765	0.902815
541	0	6088	15586			1.96923e+06	1.96923e+06	1.31485	0.760543
542	0	6168	15586			1.99658e+06	1.99658e+06	1.24248	0.804845
543	0	6248	15586			1.23383e+06	1.23383e+06	1.20618	0.829065
544	0	6328	15586			1149291	1149291	1.24862	0.800887
545	0	6408	15586			1.4272e+06	1.4272e+06	1.07316	0.93183
546	0	6488	15586			1.68502e+06	1.68502e+06	1.47653	0.677266
547	0	6568	15586			1.69483e+06	1.69483e+06	1.52868	0.654159
548	0	6648	15586			1.49544e+06	1.49544e+06	1.37831	0.725524
549	0	6728	15586			1.70461e+06	1.70461e+06	1.1895	0.840687
550	0	6808	15586			1.84236e+06	1.84236e+06	1.12585	0.88822
551	0	6888	15586			1494313	1494313	1.20481	0.830008
552	0	6968	15586			1.46071e+06	1.46071e+06	1.00796	0.992099
553	0	7048	15586			1.65923e+06	1.65923e+06	1.36342	0.733451
554	0	7128	15586			1041577	1041577	1.15152	0.868418
555	0	7208	15586			1.18944e+06	1.18944e+06	0.998757	1.00124
556	0	7288	15586			1.11839e+06	1.11839e+06	1.572	0.636133
557	0	7368	15586			933284	933284	1.29993	0.769275
558	0	7448	15586			918039	918039	1.3268	0.753692
559	0	7528	15586			731987	731987	1.54997	0.645176
560	0	7608	15586			513180	513180	1.27965	0.781465
561	0	7688	15586			672651	672651	1.36753	0.731244
562	0	7768	15586			645071	645071	1.40931	0.709569
563	0	7848	15586			405114	405114	1.20713	0.828412
564	0	1448	15506			373717	373717	1.3468	0.742498
565	0	1528	15506			699001	699001	1.26277	0.791909
566	0	1608	15506			888775	888775	1.54947	0.645382
567	0	1688	15506			1.02923e+06	1.02923e+06	1.27374	0.785088
568	0	1768	15506			1.21756e+06	1.21756e+06	1.3312	0.7512
569	0	1848	15506			1.65738e+06	1.65738e+06	1.96482	0.508952
570	0	1928	15506			1.8624e+06	1.8624e+06	1.36938	0.730257
571	0	2008	15506			2061387	2061387	1.6433	0.60853
572	0	2088	15506			2.1385e+06	2.1385e+06	1.42927	0.699658
573	0	2168	15506			2202365	2202365	1.32103	0.756986
574	0	2248	15506			2.4328e+06	2.4328e+06	1.35679	0.737034
575	0	2328	15506			2176116	2176116	1.21243	0.824788
576	0	2408	15506			1149524	1149524	1.18044	0.847141
577	0	2488	15506			990327	990327	1.04436	0.957528
578	0	2568	15506			1.45359e+06	1.45359e+06	0.891759	1.12138
579	0	2648	15506			1.82562e+06	1.82562e+06	1.27587	0.783776
580	0	2728	15506			1639845	1639845	1.17878	0.848332
581	0	2808	15506			1953273	1953273	1.11032	0.90064
582	0	2888	15506			2.28973e+06	2.28973e+06	1.43778	0.695516
583	0	2968	15506			2.29686e+06	2.29686e+06	1.17616	0.850228
584	0	3048	15506			2.65707e+06	2.65707e+06	1.28781	0.776513
585	0	3128	15506			3.03172e+06	3.03172e+06	1.27955	0.781522
586	0	3208	15506			3.21468e+06	3.21468e+06	1.1205	0.892457
587	0	3288	15506			3.01657e+06	3.01657e+06	1.20205	0.831915
588	0	3368	15506			2.64092e+06	2.64092e+06	1.15957	0.862392
589	0	3448	15506			2.84198e+06	2.84198e+06	1.34442	0.743813
590	0	3528	15506			2.90177e+06	2.90177e+06	1.11993	0.892913
591	0	3608	15506			3545903	3545903	1.08869	0.918533
592	0	3688	15506			3.42945e+06	3.42945e+06	1.18469	0.8441
593	0	3768	15506			3661881	3661881	1.06886	0.935575
594	0	3848	15506			2.47741e+06	2.47741e+06	1.09061	0.916916
595	0	3928	15506			2.74835e+06	2.74835e+06	0.842828	1.18648
596	0	4008	15506			3.52812e+06	3.52812e+06	1.22595	0.815693
597	0	4088	15506			3.65904e+06	3.65904e+06	1.50502	0.664445
598	0	4168	15506			3.95919e+06	3.95919e+06	1.29213	0.773917
599	0	4248	15506			3.52419e+06	3.52419e+06	1.40592	0.711277
600	0	4328	15506			3.8689e+06	3.8689e+06	1.3541	0.738496
601	0	4408	15506			3385731	3385731	1.49509	0.668856
602	0	4488	15506			3.02364e+06	3.02364e+06	1.38386	0.722615
603	0	4568	15506			2.43153e+06	2.43153e+06	1.35176	0.739774
604	0	4648	15506			1933332	1933332	1.34471	0.743654
605	0	4728	15506			2203895	2203895	1.62332	0.61602
606	0	4808	15506			2310867	2310867	1.29738	0.770784
607	0	4888	15506			1.82733e+06	1.82733e+06	1.89279	0.528322
608	0	4968	15506			1928159	1928159	1.43375	0.697473
609	0	5048	15506			2514908	2514908	1.57402	0.635317
610	0	5128	15506			2819439	2819439	1.56455	0.639159
611	0	5208	15506			2.66657e+06	2.66657e+06	1.75457	0.569942
612	0	5288	15506			3925715	3925715	1.57267	0.63586
613	0	5368	15506			4.8432e+06	4.8432e+06	1.45586	0.686879
614	0	5448	15506			4149382	4149382	1.4641	0.683012
615	0	5528	15506			5.68508e+06	5.68508e+06	1.3825	0.723329
616	0	5608	15506			5.47409e+06	5.47409e+06	1.36211	0.734154
617	0	5688	15506			4722465	4722465	1.49898	0.667122
618	0	5768	15506			4.65308e+06	4.65308e+06	1.30137	0.768418
619	0	5848	15506			3.81966e+06	3.81966e+06	1.26303	0.791747
620	0	5928	15506			2.72477e+06	2.72477e+06	1.40657	0.71095
621	0	6008	15506			1.84114e+06	1.84114e+06	1.20813	0.827724
622	0	6088	15506			2.11568e+06	2.11568e+06	1.17856	0.848496
623	0	6168	15506			1.77856e+06	1.77856e+06	1.52327	0.656484
624	0	6248	15506			1.29047e+06	1.29047e+06	1.0044	0.995618
625	0	6328	15506			1.85268e+06	1.85268e+06	1.16618	0.857499
626	0	6408	15506			1.75635e+06	1.75635e+06	1.11799	0.894465
627	0	6488	15506			1.96705e+06	1.96705e+06	1.39829	0.715159
628	0	6568	15506			2.02401e+06	2.02401e+06	1.34944	0.741047
629	0	6648	15506			2.10948e+06	2.10948e+06	1.0626	0.941084
630	0	6728	15506			2148131	2148131	1.34066	0.745902
631	0	6808	15506			2.31271e+06	2.31271e+06	1.27586	0.783788
632	0	6888	15506			1.88207e+06	1.88207e+06	1.30817	0.764428
633	0	6968	15506			1.24461e+06	1.24461e+06	1.43084	0.698891
634	0	7048	15506			1.18064e+06	1.18064e+06	1.22498	0.816337
635	0	7128	15506			1.44251e+06	1.44251e+06	1.33105	0.751284
636	0	7208	15506			1.87156e+06	1.87156e+06	1.16963	0.854969
637	0	7288	15506			1.2825e+06	1.2825e+06	1.41156	0.708435
638	0	7368	15506			1.17717e+06	1.17717e+06	1.61861	0.617813
639	0	7448	15506			806994	806994	1.83472	0.545041
640	0	7528	15506			1.14576e+06	1.14576e+06	1.34826	0.741695
641	0	7608	15506			984567	984567	1.40513	0.711677
642	0	7688	15506			754882	754882	1.57564	0.634663
643	0	7768	15506			635105	635105	1.41417	0.707129
644	0	7848	15506			539616	539616	1.18756	0.842062
645	0	7928	15506			401947	401947	1.36861	0.730668
646	0	8008	15506			362030	362030	1.23711	0.808334
647	0	1368	15426			476384	476384	1.36191	0.734265
648	0	1448	15426			764677	764677	1.53196	0.652759
649	0	1528	15426			933012	933012	1.20751	0.828149
650	0	1608	15426			1.32152e+06	1.32152e+06	1.87568	0.53314
651	0	1688	15426			1.50631e+06	1.50631e+06	1.49908	0.667074
652	0	1768	15426			1.59452e+06	1.59452e+06	1.67222	0.598007
653	0	1848	15426			1.90114e+06	1.90114e+06	1.46755	0.681407
654	0	1928	15426			2283010	2283010	1.3067	0.765284
655	0	2008	15426			2036733	2036733	1.48877	0.671694
656	0	2088	15426			2.65699e+06	2.65699e+06	1.51965	0.658044
657	0	2168	15426			2.45661e+06	2.45661e+06	1.31041	0.763122
658	0	2248	15426			2626266	2626266	1.55661	0.642422
659	0	2328	15426			2533332	2533332	1.18799	0.841755
660	0	2408	15426			2148378	2148378	1.0841	0.922421
661	0	2488	15426			1.64555e+06	1.64555e+06	1.18825	0.841571
662	0	2568	15426			1.55626e+06	1.55626e+06	1.06543	0.938588
663	0	2648	15426			2725867	2725867	1.19712	0.835339
664	0	2728	15426			2.95324e+06	2.95324e+06	1.03124	0.969704
665	0	2808	15426			2.10942e+06	2.10942e+06	1.12784	0.88665
666	0	2888	15426			2.55597e+06	2.55597e+06	0.942799	1.06067
667	0	2968	15426			2.99839e+06	2.99839e+06	1.06113	0.942392
668	0	3048	15426			3.61046e+06	3.61046e+06	1.10725	0.903141
669	0	3128	15426			4484311	4484311	1.13145	0.883822
670	0	3208	15426			4.01967e+06	4.01967e+06	0.963736	1.03763
671	0	3288	15426			3.90156e+06	3.90156e+06	0.9811	1.01926
672	0	3368	15426			3.81313e+06	3.81313e+06	0.915961	1.09175
673	0	3448	15426			3.93545e+06	3.93545e+06	1.03817	0.963231
674	0	3528	15426			3955863	3955863	1.17661	0.8499
675	0	3608	15426			5.14326e+06	5.14326e+06	1.21649	0.822039
676	0	3688	15426			4679228	4679228	1.03556	0.965657
677	0	3768	15426			4550443	4550443	1.13697	0.879533
678	0	3848	15426			4505825	4505825	1.1288	0.885899
679	0	3928	15426			5.32414e+06	5.32414e+06	0.947929	1.05493
680	0	4008	15426			5690237	5690237	1.28121	0.780511
681	0	4088	15426			4.47378e+06	4.47378e+06	1.08586	0.920932
682	0	4168	15426			4509088	4509088	1.5072	0.663481
683	0	4248	15426			2.97887e+06	2.97887e+06	1.18039	0.847179
684	0	4328	15426			3.39212e+06	3.39212e+06	1.41704	0.705695
685	0	4408	15426			3.34578e+06	3.34578e+06	1.42061	0.703924
686	0	4488	15426			3181503	3181503	1.39036	0.719237
687	0	4568	15426			2.52879e+06	2.52879e+06	1.28331	0.779236
688	0	4648	15426			2.76221e+06	2.76221e+06	1.42712	0.700712
689	0	4728	15426			2.26499e+06	2.26499e+06	1.40242	0.713054
690	0	4808	15426			2.24458e+06	2.24458e+06	1.59907	0.625362
691	0	4888	15426			2.3168e+06	2.3168e+06	1.54609	0.646791
692	0	4968	15426			2.16389e+06	2.16389e+06	1.58691	0.630154
693	0	5048	15426			2596385	2596385	1.79214	0.557992
694	0	5128	15426			2.75343e+06	2.75343e+06	1.29605	0.771577
695	0	5208	15426			2.80685e+06	2.80685e+06	1.70448	0.58669
696	0	5288	15426			4.13128e+06	4.13128e+06	1.32083	0.757103
697	0	5368	15426			4688789	4688789	1.2485	0.80096
698	0	5448	15426			4853409	4853409	1.18843	0.841444
699	0	5528	15426			5224685	5224685	1.1431	0.874813
700	0	5608	15426			3.89304e+06	3.89304e+06	1.11136	0.899798
701	0	5688	15426			3.81838e+06	3.81838e+06	1.0371	0.96423
702	0	5768	15426			4.06591e+06	4.06591e+06	1.2267	0.815195
703	0	5848	15426			4.79068e+06	4.79068e+06	1.34778	0.741963
704	0	5928	15426			4.07545e+06	4.07545e+06	1.33221	0.750633
705	0	6008	15426			2592832	2592832	1.19754	0.835045
706	0	6088	15426			2119502	2119502	1.42172	0.703373
707	0	6168	15426			2.52781e+06	2.52781e+06	1.2771	0.783026
708	0	6248	15426			2.3132e+06	2.3132e+06	1.39541	0.716636
709	0	6328	15426			2594938	2594938	1.20412	0.830484
710	0	6408	15426			2203911	2203911	1.3752	0.727167
711	0	6488	15426			2110527	2110527	1.44436	0.69235
712	0	6568	15426			2.74422e+06	2.74422e+06	1.13115	0.884054
713	0	6648	15426			2.11048e+06	2.11048e+06	1.27899	0.781867
714	0	6728	15426			2.73422e+06	2.73422e+06	1.05725	0.945853
715	0	6808	15426			2.34103e+06	2.34103e+06	1.1745	0.851427
716	0	6888	15426			2.14057e+06	2.14057e+06	1.42151	0.703478
717	0	6968	15426			1866098	1866098	1.43838	0.695226
718	0	7048	15426			1.36244e+06	1.36244e+06	1.26781	0.788763
719	0	7128	15426			1.68059e+06	1.68059e+06	1.34907	0.741254
720	0	7208	15426			1.59584e+06	1.59584e+06	1.35632	0.737288
721	0	7288	15426			1.76528e+06	1.76528e+06	1.48258	0.674498
722	0	7368	15426			1.62772e+06	1.62772e+06	1.44348	0.692768
723	0	7448	15426			1.4489e+06	1.4489e+06	1.48283	0.674385
724	0	7528	15426			1.16471e+06	1.16471e+06	1.38741	0.720769
725	0	7608	15426			1.28289e+06	1.28289e+06	1.38234	0.72341
726	0	7688	15426			934644	934644	1.33731	0.747769
727	0	7768	15426			1.12112e+06	1.12112e+06	1.35771	0.736537
728	0	7848	15426			986924	986924	1.31313	0.761537
729	0	7928	15426			915219	915219	1.63679	0.610953
730	0	8008	15426			430686	430686	1.00764	0.99242
731	0	8088	15426			492590	492590	1.36787	0.731064
732	0	8168	15426			386522	386522	1.43389	0.697402
733	0	1288	15346			626001	626001	1.56556	0.638751
734	0	1368	15346			944974	944974	1.27412	0.784857
735	0	1448	15346			1.10299e+06	1.10299e+06	1.47874	0.67625
736	0	1528	15346			1.34041e+06	1.34041e+06	1.44446	0.6923
737	0	1608	15346			1411250	1411250	1.33078	0.75144
738	0	1688	15346			1.301e+06	1.301e+06	1.60072	0.624719
739	0	1768	15346			2.14691e+06	2.14691e+06	1.50771	0.663257
740	0	1848	15346			2.9791e+06	2.9791e+06	1.39536	0.716662
741	0	1928	15346			2.38368e+06	2.38368e+06	1.6356	0.611398
742	0	2008	15346			2.69519e+06	2.69519e+06	1.32563	0.754359
743	0	2088	15346			2.29913e+06	2.29913e+06	1.52911	0.653977
744	0	2168	15346			2.61161e+06	2.61161e+06	1.52436	0.656014
745	0	2248	15346			3615022	3615022	1.97495	0.506342
746	0	2328	15346			3.66316e+06	3.66316e+06	1.2075	0.828158
747	0	2408	15346			2397743	2397743	1.11269	0.898723
748	0	2488	15346			2.44744e+06	2.44744e+06	1.19018	0.840212
749	0	2568	15346			2.13966e+06	2.13966e+06	0.969241	1.03174
750	0	2648	15346			2.29167e+06	2.29167e+06	1.02802	0.972744
751	0	2728	15346			4.25595e+06	4.25595e+06	0.979785	1.02063
752	0	2808	15346			3.62355e+06	3.62355e+06	1.30773	0.764682
753	0	2888	15346			3.78096e+06	3.78096e+06	0.947566	1.05534
754	0	2968	15346			4.29179e+06	4.29179e+06	1.17452	0.851414
755	0	3048	15346			4.06522e+06	4.06522e+06	1.01056	0.989553
756	0	3128	15346			4844131	4844131	1.00715	0.992904
757	0	3208	15346			5132550	5132550	0.798949	1.25164
758	0	3288	15346			6.40687e+06	6.40687e+06	1.06889	0.93555
759	0	3368	15346			7.34066e+06	7.34066e+06	0.82314	1.21486
760	0	3448	15346			6314129	6314129	1.17225	0.853061
761	0	3528	15346			6.12741e+06	6.12741e+06	0.888595	1.12537
762	0	3608	15346			6682633	6682633	0.912284	1.09615
763	0	3688	15346			7.28057e+06	7.28057e+06	0.940897	1.06282
764	0	3768	15346			7.14455e+06	7.14455e+06	0.945748	1.05736
765	0	3848	15346			8353303	8353303	0.959736	1.04195
766	0	3928	15346			7.96969e+06	7.96969e+06	1.20835	0.827575
767	0	4008	15346			6.12707e+06	6.12707e+06	1.35215	0.739561
768	0	4088	15346			6.25169e+06	6.25169e+06	1.25308	0.798032
769	0	4168	15346			8.11313e+06	8.11313e+06	1.10162	0.907757
770	0	4248	15346			5.68453e+06	5.68453e+06	1.48552	0.673165
771	0	4328	15346			3.99604e+06	3.99604e+06	1.1163	0.895818
772	0	4408	15346			3969340	3969340	1.6619	0.601719
773	0	4488	15346			2.33937e+06	2.33937e+06	1.231	0.812347
774	0	4568	15346			2.05197e+06	2.05197e+06	1.43172	0.698461
775	0	4648	15346			2.41865e+06	2.41865e+06	1.22861	0.813927
776	0	4728	15346			3059490	3059490	1.45338	0.688054
777	0	4808	15346			2.0125e+06	2.0125e+06	1.37275	0.728465
778	0	4888	15346			1.6403e+06	1.6403e+06	1.59236	0.628
779	0	4968	15346			1.66434e+06	1.66434e+06	1.53458	0.651642
780	0	5048	15346			2.17703e+06	2.17703e+06	1.57693	0.634145
781	0	5128	15346			3.20098e+06	3.20098e+06	1.75654	0.5693
782	0	5208	15346			3.67714e+06	3.67714e+06	1.26519	0.790397
783	0	5288	15346			4.56942e+06	4.56942e+06	1.29395	0.772827
784	0	5368	15346			5.13853e+06	5.13853e+06	1.17173	0.853438
785	0	5448	15346			4351787	4351787	1.33088	0.751384
786	0	5528	15346			6.86836e+06	6.86836e+06	1.47109	0.679768
787	0	5608	15346			7444919	7444919	1.13778	0.878905
788	0	5688	15346			6291717	6291717	1.40538	0.711552
789	0	5768	15346			5484184	5484184	1.23351	0.810697
790	0	5848	15346			5.1412e+06	5.1412e+06	1.33545	0.74881
791	0	5928	15346			3.39611e+06	3.39611e+06	1.33202	0.750741
792	0	6008	15346			2.5728e+06	2.5728e+06	1.44118	0.693878
793	0	6088	15346			3417520	3417520	1.16656	0.857219
794	0	6168	15346			3095086	3095086	1.27467	0.784516
795	0	6248	15346			2.7548e+06	2.7548e+06	1.26963	0.78763
796	0	6328	15346			2.69204e+06	2.69204e+06	1.27342	0.785287
797	0	6408	15346			2.34493e+06	2.34493e+06	1.1043	0.905554
798	0	6488	15346			2.63021e+06	2.63021e+06	1.01321	0.986967
799	0	6568	15346			2805721	2805721	1.22253	0.817974
800	0	6648	15346			2.6491e+06	2.6491e+06	1.53837	0.650037
801	0	6728	15346			2.52177e+06	2.52177e+06	1.06999	0.934588
802	0	6808	15346			2474351	2474351	1.27763	0.782698
803	0	6888	15346			2.96727e+06	2.96727e+06	1.2948	0.772322
804	0	6968	15346			2.35295e+06	2.35295e+06	1.58543	0.630744
805	0	7048	15346			2.56646e+06	2.56646e+06	1.4847	0.673538
806	0	7128	15346			2.67061e+06	2.67061e+06	1.35658	0.737148
807	0	7208	15346			2.33067e+06	2.33067e+06	1.42048	0.703988
808	0	7288	15346			2.09277e+06	2.09277e+06	1.48788	0.672097
809	0	7368	15346			1925292	1925292	1.45358	0.687958
810	0	7448	15346			1.79192e+06	1.79192e+06	1.32234	0.756238
811	0	7528	15346			1.70172e+06	1.70172e+06	1.53956	0.649535
812	0	7608	15346			1.39143e+06	1.39143e+06	1.76514	0.566526
813	0	7688	15346			1.32826e+06	1.32826e+06	1.71441	0.583292
814	0	7768	15346			1.27148e+06	1.27148e+06	1.48067	0.67537
815	0	7848	15346			1.13845e+06	1.13845e+06	1.31127	0.762619
816	0	7928	15346			1.16596e+06	1.16596e+06	1.53927	0.649659
817	0	8008	15346			781051	781051	1.28266	0.779633
818	0	8088	15346			661949	661949	1.61382	0.619646
819	0	8168	15346			579104	579104	1.38598	0.72151
820	0	8248	15346			553790	553790	1.3877	0.720617
821	0	1208	15266			718555	718555	1.22635	0.81543
822	0	1288	15266			783168	783168	1.61887	0.617716
823	0	1368	15266			1.11491e+06	1.11491e+06	1.5747	0.635043
824	0	1448	15266			1.37698e+06	1.37698e+06	1.56281	0.639873
825	0	1528	15266			1584883	1584883	1.29084	0.77469
826	0	1608	15266			1.20822e+06	1.20822e+06	1.22926	0.8135
827	0	1688	15266			2.61417e+06	2.61417e+06	1.77511	0.563344
828	0	1768	15266			2.50609e+06	2.50609e+06	2.0587	0.485743
829	0	1848	15266			1.7319e+06	1.7319e+06	1.8545	0.539228
830	0	1928	15266			3.20033e+06	3.20033e+06	1.41925	0.704599
831	0	2008	15266			3.10028e+06	3.10028e+06	1.52865	0.654171
832	0	2088	15266			3.51036e+06	3.51036e+06	1.29496	0.772227
833	0	2168	15266			3.57833e+06	3.57833e+06	1.78123	0.561411
834	0	2248	15266			3263257	3263257	1.4508	0.689273
835	0	2328	15266			3.14881e+06	3.14881e+06	1.24346	0.804206
836	0	2408	15266			2.22788e+06	2.22788e+06	1.08639	0.920481
837	0	2488	15266			1.9651e+06	1.9651e+06	0.980304	1.02009
838	0	2568	15266			3092220	3092220	1.11932	0.893402
839	0	2648	15266			3747945	3747945	1.07727	0.928268
840	0	2728	15266			4.88835e+06	4.88835e+06	1.05777	0.945389
841	0	2808	15266			4558390	4558390	0.866324	1.1543
842	0	2888	15266			5.37106e+06	5.37106e+06	0.836341	1.19568
843	0	2968	15266			6.49576e+06	6.49576e+06	0.974006	1.02669
844	0	3048	15266			7410944	7410944	0.767228	1.30339
845	0	3128	15266			7.82169e+06	7.82169e+06	1.04401	0.957847
846	0	3208	15266			8817744	8817744	0.938123	1.06596
847	0	3288	15266			9661002	9661002	0.986249	1.01394
848	0	3368	15266			6.26422e+06	6.26422e+06	0.740765	1.34996
849	0	3448	15266			6690049	6690049	0.879609	1.13687
850	0	3528	15266			7.80522e+06	7.80522e+06	0.835972	1.19621
851	0	3608	15266			7.15554e+06	7.15554e+06	0.797678	1.25364
852	0	3688	15266			6960251	6960251	0.821346	1.21751
853	0	3768	15266			5993875	5993875	0.804828	1.2425
854	0	3848	15266			5621757	5621757	1.00435	0.995673
855	0	3928	15266			6124030	6124030	1.01912	0.981238
856	0	4008	15266			5.61166e+06	5.61166e+06	0.84032	1.19002
857	0	4088	15266			7927201	7927201	1.13897	0.877983
858	0	4168	15266			7450482	7450482	1.1435	0.874506
859	0	4248	15266			7737606	7737606	1.0914	0.916253
860	0	4328	15266			6.50575e+06	6.50575e+06	1.20352	0.830898
861	0	4408	15266			4.25876e+06	4.25876e+06	1.41778	0.705327
862	0	4488	15266			2.94515e+06	2.94515e+06	1.22494	0.816369
863	0	4568	15266			2.58277e+06	2.58277e+06	1.44698	0.691095
864	0	4648	15266			2.39796e+06	2.39796e+06	1.3819	0.723642
865	0	4728	15266			2.77427e+06	2.77427e+06	1.48388	0.673911
866	0	4808	15266			2554957	2554957	1.43469	0.697016
867	0	4888	15266			2.56771e+06	2.56771e+06	1.33927	0.746677
868	0	4968	15266			2.49629e+06	2.49629e+06	1.32359	0.75552
869	0	5048	15266			2.80966e+06	2.80966e+06	1.23575	0.809225
870	0	5128	15266			3.09199e+06	3.09199e+06	1.41988	0.704283
871	0	5208	15266			3.88064e+06	3.88064e+06	1.47498	0.677973
872	0	5288	15266			5077571	5077571	1.20668	0.82872
873	0	5368	15266			6762544	6762544	1.09787	0.910856
874	0	5448	15266			6076809	6076809	1.35985	0.735375
875	0	5528	15266			6.70931e+06	6.70931e+06	0.896616	1.1153
876	0	5608	15266			6.17844e+06	6.17844e+06	1.02825	0.972525
877	0	5688	15266			6023690	6023690	1.08276	0.923564
878	0	5768	15266			5.58426e+06	5.58426e+06	1.08685	0.920089
879	0	5848	15266			5.72098e+06	5.72098e+06	1.42821	0.700178
880	0	5928	15266			3.44547e+06	3.44547e+06	1.5699	0.636983
881	0	6008	15266			3.60884e+06	3.60884e+06	1.09494	0.913289
882	0	6088	15266			4.87438e+06	4.87438e+06	1.10115	0.90814
883	0	6168	15266			3.85348e+06	3.85348e+06	1.09192	0.915821
884	0	6248	15266			3.5613e+06	3.5613e+06	1.14467	0.873618
885	0	6328	15266			3334829	3334829	1.25719	0.795424
886	0	6408	15266			3.3905e+06	3.3905e+06	1.04703	0.955084
887	0	6488	15266			3.05592e+06	3.05592e+06	1.25933	0.794071
888	0	6568	15266			2.70827e+06	2.70827e+06	1.05518	0.947707
889	0	6648	15266			2.91692e+06	2.91692e+06	1.09078	0.916772
890	0	6728	15266			2.84172e+06	2.84172e+06	1.19866	0.834267
891	0	6808	15266			3.66776e+06	3.66776e+06	1.29828	0.770248
892	0	6888	15266			2.65614e+06	2.65614e+06	1.1638	0.859257
893	0	6968	15266			2.65211e+06	2.65211e+06	1.30335	0.767256
894	0	7048	15266			2.37527e+06	2.37527e+06	1.36139	0.734541
895	0	7128	15266			1.98887e+06	1.98887e+06	1.30303	0.767441
896	0	7208	15266			1754336	1754336	1.37268	0.728504
897	0	7288	15266			2.54082e+06	2.54082e+06	1.24696	0.801949
898	0	7368	15266			2.0936e+06	2.0936e+06	1.76439	0.56677
899	0	7448	15266			1.84954e+06	1.84954e+06	1.5698	0.637023
900	0	7528	15266			1.65982e+06	1.65982e+06	1.56165	0.640349
901	0	7608	15266			1.94558e+06	1.94558e+06	1.35146	0.739941
902	0	7688	15266			1781617	1781617	1.36842	0.730768
903	0	7768	15266			1.79524e+06	1.79524e+06	1.33935	0.746632
904	0	7848	15266			1.78976e+06	1.78976e+06	1.47028	0.680143
905	0	7928	15266			1.42595e+06	1.42595e+06	1.64353	0.608448
906	0	8008	15266			1.11885e+06	1.11885e+06	1.41866	0.70489
907	0	8088	15266			1.1707e+06	1.1707e+06	1.64175	0.609108
908	0	8168	15266			971993	971993	1.36199	0.734218
909	0	8248	15266			826287	826287	1.62506	0.615361
910	0	8328	15266			760212	760212	1.28154	0.780311
911	0	8408	15266			409219	409219	1.46923	0.680627
912	0	1208	15186			1.00047e+06	1.00047e+06	1.27669	0.783276
913	0	1288	15186			562972	562972	1.43549	0.696627
914	0	1368	15186			1.20811e+06	1.20811e+06	1.60877	0.621593
915	0	1448	15186			1.58629e+06	1.58629e+06	1.33545	0.74881
916	0	1528	15186			1.81429e+06	1.81429e+06	1.39432	0.717196
917	0	1608	15186			1.87539e+06	1.87539e+06	1.4682	0.681105
918	0	1688	15186			2.40843e+06	2.40843e+06	1.50423	0.664793
919	0	1768	15186			2546949	2546949	1.6633	0.601214
920	0	1848	15186			2.97007e+06	2.97007e+06	1.38003	0.724623
921	0	1928	15186			2363240	2363240	1.62384	0.615823
922	0	2008	15186			3.8934e+06	3.8934e+06	1.3241	0.755233
923	0	2088	15186			4098213	4098213	1.53149	0.65296
924	0	2168	15186			3.87062e+06	3.87062e+06	1.38469	0.722182
925	0	2248	15186			4.31041e+06	4.31041e+06	1.56874	0.637454
926	0	2328	15186			3.03808e+06	3.03808e+06	1.25405	0.797419
927	0	2408	15186			3471021	3471021	1.02022	0.980183
928	0	2488	15186			4044128	4044128	0.835209	1.19731
929	0	2568	15186			4370797	4370797	1.09579	0.912586
930	0	2648	15186			6.15993e+06	6.15993e+06	0.974142	1.02654
931	0	2728	15186			7.11053e+06	7.11053e+06	0.822526	1.21577
932	0	2808	15186			7508176	7508176	1.01237	0.987779
933	0	2888	15186			6.58054e+06	6.58054e+06	0.833379	1.19993
934	0	2968	15186			6201387	6201387	0.819658	1.22002
935	0	3048	15186			6965498	6965498	0.798132	1.25293
936	0	3128	15186			6734828	6734828	0.686603	1.45645
937	0	3208	15186			6959521	6959521	0.902109	1.10851
938	0	3288	15186			6914166	6914166	0.765821	1.30579
939	0	3368	15186			6454677	6454677	0.742717	1.34641
940	0	3448	15186			6712917	6712917	0.715597	1.39744
941	0	3528	15186			7112940	7112940	0.889055	1.12479
942	0	3608	15186			5.6237e+06	5.6237e+06	1.00543	0.994598
943	0	3688	15186			5.36976e+06	5.36976e+06	0.900132	1.11095
944	0	3768	15186			7.05826e+06	7.05826e+06	0.883704	1.1316
945	0	3848	15186			5165810	5165810	0.937058	1.06717
946	0	3928	15186			4.72265e+06	4.72265e+06	0.882082	1.13368
947	0	4008	15186			6502995	6502995	0.94526	1.05791
948	0	4088	15186			6.23338e+06	6.23338e+06	1.18007	0.847411
949	0	4168	15186			4601645	4601645	0.954907	1.04722
950	0	4248	15186			4.77427e+06	4.77427e+06	0.827145	1.20898
951	0	4328	15186			5.21529e+06	5.21529e+06	0.732338	1.36549
952	0	4408	15186			5267227	5267227	0.912833	1.09549
953	0	4488	15186			2.35518e+06	2.35518e+06	0.910779	1.09796
954	0	4568	15186			2822364	2822364	1.22548	0.816004
955	0	4648	15186			2.10247e+06	2.10247e+06	1.60572	0.622773
956	0	4728	15186			2.30421e+06	2.30421e+06	1.13156	0.883734
957	0	4808	15186			2.66082e+06	2.66082e+06	1.19415	0.837413
958	0	4888	15186			3244942	3244942	1.37555	0.726981
959	0	4968	15186			3.32441e+06	3.32441e+06	1.16708	0.856837
960	0	5048	15186			3452314	3452314	1.50945	0.662495
961	0	5128	15186			6.88768e+06	6.88768e+06	1.1674	0.856607
962	0	5208	15186			6695249	6695249	1.24544	0.80293
963	0	5288	15186			6580639	6580639	1.293	0.773395
964	0	5368	15186			6508797	6508797	1.30207	0.768005
965	0	5448	15186			8301824	8301824	1.24429	0.803673
966	0	5528	15186			7350938	7350938	1.35177	0.73977
967	0	5608	15186			6287748	6287748	1.16963	0.854972
968	0	5688	15186			5.14827e+06	5.14827e+06	1.1641	0.859034
969	0	5768	15186			6016207	6016207	0.901949	1.10871
970	0	5848	15186			6.28793e+06	6.28793e+06	0.988285	1.01185
971	0	5928	15186			4976482	4976482	0.911903	1.09661
972	0	6008	15186			6.02293e+06	6.02293e+06	1.29552	0.771893
973	0	6088	15186			5.66002e+06	5.66002e+06	0.971548	1.02929
974	0	6168	15186			4.07992e+06	4.07992e+06	1.10007	0.909036
975	0	6248	15186			3.43811e+06	3.43811e+06	1.24711	0.801855
976	0	6328	15186			3909204	3909204	1.05008	0.952307
977	0	6408	15186			4.85328e+06	4.85328e+06	1.08228	0.923974
978	0	6488	15186			3.70655e+06	3.70655e+06	1.12647	0.887726
979	0	6568	15186			4.01187e+06	4.01187e+06	1.20437	0.830311
980	0	6648	15186			3.071e+06	3.071e+06	0.993091	1.00696
981	0	6728	15186			3.21435e+06	3.21435e+06	1.3321	0.750695
982	0	6808	15186			3.35278e+06	3.35278e+06	1.19962	0.833595
983	0	6888	15186			2.93026e+06	2.93026e+06	1.6713	0.598335
984	0	6968	15186			2.55578e+06	2.55578e+06	1.32574	0.754297
985	0	7048	15186			3.02369e+06	3.02369e+06	1.54411	0.647621
986	0	7128	15186			2.40775e+06	2.40775e+06	1.24882	0.800757
987	0	7208	15186			2.047e+06	2.047e+06	1.24705	0.801891
988	0	7288	15186			2.46405e+06	2.46405e+06	1.23481	0.809844
989	0	7368	15186			2.33841e+06	2.33841e+06	1.52546	0.655541
990	0	7448	15186			2.37048e+06	2.37048e+06	1.40293	0.712792
991	0	7528	15186			1.67135e+06	1.67135e+06	1.35225	0.739506
992	0	7608	15186			2.35301e+06	2.35301e+06	1.72037	0.58127
993	0	7688	15186			1815606	1815606	1.44488	0.692097
994	0	7768	15186			1.92052e+06	1.92052e+06	1.35411	0.738492
995	0	7848	15186			2062469	2062469	1.59679	0.626255
996	0	7928	15186			2.52611e+06	2.52611e+06	1.62734	0.614498
997	0	8008	15186			2.00628e+06	2.00628e+06	1.61925	0.617569
998	0	8088	15186			1.59446e+06	1.59446e+06	1.52186	0.65709
999	0	8168	15186			1482967	1482967	1.43207	0.698289
1000	0	8248	15186			1352117	1352117	1.41438	0.707024
1001	0	8328	15186			997146	997146	1.47029	0.680137
1002	0	8408	15186			809779	809779	1.66909	0.599129
1003	0	8488	15186			356809	356809	1.19207	0.838878
1004	0	1128	15106			454764	454764	1.32841	0.752778
1005	0	1208	15106			846760	846760	1.01913	0.981225
1006	0	1288	15106			1442031	1442031	1.57908	0.63328
1007	0	1368	15106			1.62082e+06	1.62082e+06	1.60466	0.623186
1008	0	1448	15106			2.06901e+06	2.06901e+06	2.33125	0.428955
1009	0	1528	15106			1.67443e+06	1.67443e+06	2.13802	0.467722
1010	0	1608	15106			1.81143e+06	1.81143e+06	1.69758	0.589074
1011	0	1688	15106			2.46112e+06	2.46112e+06	1.69531	0.589863
1012	0	1768	15106			3.11238e+06	3.11238e+06	1.50974	0.662365
1013	0	1848	15106			2.92693e+06	2.92693e+06	1.3174	0.759069
1014	0	1928	15106			3.31766e+06	3.31766e+06	1.41298	0.707722
1015	0	2008	15106			3.42344e+06	3.42344e+06	1.38538	0.721822
1016	0	2088	15106			2.11289e+06	2.11289e+06	1.15853	0.86316
1017	0	2168	15106			4593995	4593995	1.16369	0.859336
1018	0	2248	15106			5.12783e+06	5.12783e+06	1.236	0.809063
1019	0	2328	15106			5046819	5046819	1.38573	0.721643
1020	0	2408	15106			4.40016e+06	4.40016e+06	0.866606	1.15393
1021	0	2488	15106			5.51334e+06	5.51334e+06	1.04469	0.957221
1022	0	2568	15106			5630091	5630091	1.0271	0.973618
1023	0	2648	15106			5.03241e+06	5.03241e+06	0.808024	1.23759
1024	0	2728	15106			6.48626e+06	6.48626e+06	0.887943	1.1262
1025	0	2808	15106			6.45893e+06	6.45893e+06	0.766792	1.30413
1026	0	2888	15106			5477292	5477292	0.698168	1.43232
1027	0	2968	15106			3867918	3867918	0.645851	1.54835
1028	0	3048	15106			3.31977e+06	3.31977e+06	0.845229	1.18311
1029	0	3128	15106			4.19557e+06	4.19557e+06	0.834554	1.19824
1030	0	3208	15106			6977013	6977013	0.722746	1.38361
1031	0	3288	15106			7248204	7248204	0.74368	1.34466
1032	0	3368	15106			3.81998e+06	3.81998e+06	0.476222	2.09986
1033	0	3448	15106			4943973	4943973	0.663698	1.50671
1034	0	3528	15106			3.44709e+06	3.44709e+06	0.751819	1.33011
1035	0	3608	15106			2.80492e+06	2.80492e+06	0.811537	1.23223
1036	0	3688	15106			3.04655e+06	3.04655e+06	0.698814	1.431
1037	0	3768	15106			2.87814e+06	2.87814e+06	0.737847	1.3553
1038	0	3848	15106			2.49432e+06	2.49432e+06	0.768265	1.30163
1039	0	3928	15106			2.47176e+06	2.47176e+06	0.719543	1.38977
1040	0	4008	15106			2735406	2735406	0.884438	1.13066
1041	0	4088	15106			3.47543e+06	3.47543e+06	0.861682	1.16052
1042	0	4168	15106			3.82673e+06	3.82673e+06	0.70761	1.41321
1043	0	4248	15106			2.67448e+06	2.67448e+06	0.595712	1.67866
1044	0	4328	15106			5202844	5202844	0.947957	1.0549
1045	0	4408	15106			5.42715e+06	5.42715e+06	0.930743	1.07441
1046	0	4488	15106			4.96709e+06	4.96709e+06	0.860037	1.16274
1047	0	4568	15106			5037703	5037703	1.28935	0.775584
1048	0	4648	15106			6439546	6439546	1.2127	0.824603
1049	0	4728	15106			7.0664e+06	7.0664e+06	1.29882	0.769927
1050	0	4808	15106			6487426	6487426	1.11791	0.89453
1051	0	4888	15106			5867434	5867434	1.296	0.771605
1052	0	4968	15106			5.95638e+06	5.95638e+06	1.19626	0.835935
1053	0	5048	15106			6819260	6819260	1.44297	0.693015
1054	0	5128	15106			7.5028e+06	7.5028e+06	0.982484	1.01783
1055	0	5208	15106			6.48679e+06	6.48679e+06	1.02655	0.97414
1056	0	5288	15106			6326883	6326883	1.1589	0.862886
1057	0	5368	15106			6.93168e+06	6.93168e+06	1.12795	0.886564
1058	0	5448	15106			6445035	6445035	1.12663	0.887607
1059	0	5528	15106			8.16481e+06	8.16481e+06	0.969081	1.03191
1060	0	5608	15106			7805444	7805444	1.12282	0.890614
1061	0	5688	15106			5.01149e+06	5.01149e+06	0.886856	1.12758
1062	0	5768	15106			6726288	6726288	0.962708	1.03874
1063	0	5848	15106			6253456	6253456	0.869714	1.1498
1064	0	5928	15106			5.54643e+06	5.54643e+06	1.07174	0.933062
1065	0	6008	15106			6077261	6077261	0.862198	1.15983
1066	0	6088	15106			6.43335e+06	6.43335e+06	0.930154	1.07509
1067	0	6168	15106			5853012	5853012	0.853594	1.17152
1068	0	6248	15106			4.53005e+06	4.53005e+06	0.722285	1.38449
1069	0	6328	15106			4.89903e+06	4.89903e+06	0.790746	1.26463
1070	0	6408	15106			4.06219e+06	4.06219e+06	1.13429	0.881612
1071	0	6488	15106			4518888	4518888	0.945933	1.05716
1072	0	6568	15106			5092882	5092882	0.974315	1.02636
1073	0	6648	15106			4.42227e+06	4.42227e+06	1.08179	0.924392
1074	0	6728	15106			4323844	4323844	1.12437	0.889386
1075	0	6808	15106			3.84872e+06	3.84872e+06	1.33408	0.749579
1076	0	6888	15106			3.55679e+06	3.55679e+06	1.22483	0.816442
1077	0	6968	15106			4.01045e+06	4.01045e+06	1.24954	0.800296
1078	0	7048	15106			3.39445e+06	3.39445e+06	1.15893	0.862864
1079	0	7128	15106			3.1601e+06	3.1601e+06	1.22111	0.818925
1080	0	7208	15106			2955835	2955835	1.32666	0.753775
1081	0	7288	15106			2268005	2268005	1.35558	0.737692
1082	0	7368	15106			2.40017e+06	2.40017e+06	1.38271	0.723218
1083	0	7448	15106			1.68343e+06	1.68343e+06	1.25528	0.796633
1084	0	7528	15106			1.9827e+06	1.9827e+06	1.36548	0.732342
1085	0	7608	15106			1.97175e+06	1.97175e+06	1.65534	0.604104
1086	0	7688	15106			2.00153e+06	2.00153e+06	1.93923	0.515669
1087	0	7768	15106			2.07032e+06	2.07032e+06	1.30743	0.764859
1088	0	7848	15106			3.01436e+06	3.01436e+06	1.45591	0.686854
1089	0	7928	15106			2449587	2449587	1.52414	0.656107
1090	0	8008	15106			2291917	2291917	1.85233	0.539862
1091	0	8088	15106			1.89301e+06	1.89301e+06	1.61954	0.617459
1092	0	8168	15106			2.03093e+06	2.03093e+06	1.62874	0.613972
1093	0	8248	15106			1.4113e+06	1.4113e+06	1.42887	0.699852
1094	0	8328	15106			1.03876e+06	1.03876e+06	2.0225	0.494438
1095	0	8408	15106			1.02883e+06	1.02883e+06	1.70294	0.587221
1096	0	8488	15106			540345	540345	1.25869	0.794478
1097	0	8568	15106			411482	411482	1.62067	0.617028
1098	0	8648	15106			97230.5	97230.5	1.81812	0.55002
1099	0	1048	15026			548839	548839	1.23448	0.810059
1100	0	1128	15026			915529	915529	1.30609	0.765643
1101	0	1208	15026			1.1292e+06	1.1292e+06	1.66969	0.598912
1102	0	1288	15026			1.52637e+06	1.52637e+06	1.55907	0.641406
1103	0	1368	15026			1.55491e+06	1.55491e+06	1.8156	0.550784
1104	0	1448	15026			2.08239e+06	2.08239e+06	2.23553	0.447321
1105	0	1528	15026			1.81018e+06	1.81018e+06	1.90934	0.523741
1106	0	1608	15026			2.42149e+06	2.42149e+06	1.44507	0.692006
1107	0	1688	15026			2.87637e+06	2.87637e+06	1.3627	0.733835
1108	0	1768	15026			3231651	3231651	1.52148	0.657253
1109	0	1848	15026			2.80668e+06	2.80668e+06	1.53412	0.651838
1110	0	1928	15026			3842048	3842048	1.58551	0.630712
1111	0	2008	15026			3.58482e+06	3.58482e+06	1.29137	0.774369
1112	0	2088	15026			4.35397e+06	4.35397e+06	1.34882	0.741388
1113	0	2168	15026			5376304	5376304	1.02491	0.975694
1114	0	2248	15026			5.20306e+06	5.20306e+06	1.14247	0.8753
1115	0	2328	15026			6.49919e+06	6.49919e+06	0.98773	1.01242
1116	0	2408	15026			6861481	6861481	0.780203	1.28172
1117	0	2488	15026			6040451	6040451	0.784167	1.27524
1118	0	2568	15026			2.72342e+06	2.72342e+06	1.01439	0.98581
1119	0	2648	15026			774167	774167	0.462924	2.16018
1120	0	2728	15026			2188755	2188755	0.622057	1.60757
1121	0	2808	15026			1.92701e+06	1.92701e+06	0.554262	1.8042
1122	0	2888	15026			1.96895e+06	1.96895e+06	0.51072	1.95802
1123	0	2968	15026			2241693	2241693	0.598655	1.67041
1124	0	3048	15026			3.50829e+06	3.50829e+06	0.667742	1.49758
1125	0	3128	15026			6.0026e+06	6.0026e+06	0.617745	1.61879
1126	0	3208	15026			4.33365e+06	4.33365e+06	0.834525	1.19829
1127	0	3288	15026			3.81236e+06	3.81236e+06	0.673515	1.48475
1128	0	3368	15026			1.95361e+06	1.95361e+06	0.46481	2.15142
1129	0	3448	15026			2.66153e+06	2.66153e+06	0.535591	1.8671
1130	0	3528	15026			2892873	2892873	0.596104	1.67756
1131	0	3608	15026			2018512	2018512	0.562354	1.77824
1132	0	3688	15026			2.03985e+06	2.03985e+06	0.665957	1.5016
1133	0	3768	15026			1.82373e+06	1.82373e+06	0.490118	2.04032
1134	0	3848	15026			539528	539528	0.33014	3.02902
1135	0	3928	15026			540574	540574	0.587883	1.70102
1136	0	4008	15026			1.36847e+06	1.36847e+06	0.493886	2.02476
1137	0	4088	15026			745023	745023	0.485123	2.06133
1138	0	4168	15026			979611	979611	0.711722	1.40504
1139	0	4248	15026			1.23693e+06	1.23693e+06	0.4167	2.39981
1140	0	4328	15026			3236611	3236611	0.849044	1.1778
1141	0	4408	15026			4.1911e+06	4.1911e+06	0.861528	1.16073
1142	0	4488	15026			4.08216e+06	4.08216e+06	1.2909	0.774653
1143	0	4568	15026			5494380	5494380	1.19363	0.837778
1144	0	4648	15026			5669898	5669898	1.27586	0.783786
1145	0	4728	15026			5805752	5805752	0.819078	1.22089
1146	0	4808	15026			6159956	6159956	0.895744	1.11639
1147	0	4888	15026			7141251	7141251	1.0122	0.987945
1148	0	4968	15026			5449130	5449130	1.21285	0.824503
1149	0	5048	15026			6.99591e+06	6.99591e+06	1.12055	0.892415
1150	0	5128	15026			7.3563e+06	7.3563e+06	1.37299	0.728338
1151	0	5208	15026			7889974	7889974	1.01833	0.982003
1152	0	5288	15026			7.19175e+06	7.19175e+06	1.17408	0.851728
1153	0	5368	15026			6.554e+06	6.554e+06	0.99674	1.00327
1154	0	5448	15026			6259705	6259705	0.98241	1.01791
1155	0	5528	15026			5485553	5485553	0.954627	1.04753
1156	0	5608	15026			6417652	6417652	1.0529	0.94976
1157	0	5688	15026			7.37238e+06	7.37238e+06	1.06192	0.941694
1158	0	5768	15026			7.31459e+06	7.31459e+06	0.994021	1.00601
1159	0	5848	15026			3622640	3622640	1.04787	0.954316
1160	0	5928	15026			3879137	3879137	1.01687	0.983406
1161	0	6008	15026			3.97799e+06	3.97799e+06	0.98856	1.01157
1162	0	6088	15026			5.8146e+06	5.8146e+06	0.893554	1.11913
1163	0	6168	15026			3.9057e+06	3.9057e+06	0.864349	1.15694
1164	0	6248	15026			5.3565e+06	5.3565e+06	0.856053	1.16815
1165	0	6328	15026			5571133	5571133	0.892288	1.12071
1166	0	6408	15026			5.06656e+06	5.06656e+06	1.01665	0.983621
1167	0	6488	15026			6.81118e+06	6.81118e+06	0.812697	1.23047
1168	0	6568	15026			6658293	6658293	1.05331	0.949389
1169	0	6648	15026			5.19323e+06	5.19323e+06	1.06214	0.941492
1170	0	6728	15026			5097284	5097284	1.22664	0.815237
1171	0	6808	15026			4531500	4531500	1.02586	0.974787
1172	0	6888	15026			4707073	4707073	1.26166	0.792604
1173	0	6968	15026			5060065	5060065	1.40065	0.713952
1174	0	7048	15026			5084455	5084455	1.20278	0.831408
1175	0	7128	15026			3922704	3922704	1.26773	0.788808
1176	0	7208	15026			4080466	4080466	1.24215	0.805056
1177	0	7288	15026			2.25149e+06	2.25149e+06	1.34759	0.742067
1178	0	7368	15026			2.44039e+06	2.44039e+06	1.15665	0.864564
1179	0	7448	15026			2262541	2262541	1.37235	0.728675
1180	0	7528	15026			2.7947e+06	2.7947e+06	1.38341	0.722852
1181	0	7608	15026			2.66961e+06	2.66961e+06	1.53705	0.650597
1182	0	7688	15026			2.5378e+06	2.5378e+06	1.67553	0.596825
1183	0	7768	15026			2.08864e+06	2.08864e+06	1.57178	0.636222
1184	0	7848	15026			2854770	2854770	1.53566	0.651184
1185	0	7928	15026			2.48449e+06	2.48449e+06	1.47578	0.677606
1186	0	8008	15026			1.94716e+06	1.94716e+06	1.67075	0.598533
1187	0	8088	15026			2053366	2053366	1.35394	0.738583
1188	0	8168	15026			2.05671e+06	2.05671e+06	1.5866	0.63028
1189	0	8248	15026			1907991	1907991	1.48026	0.675555
1190	0	8328	15026			1.65431e+06	1.65431e+06	1.40066	0.713947
1191	0	8408	15026			1.33847e+06	1.33847e+06	1.88301	0.531066
1192	0	8488	15026			1031385	1031385	1.58207	0.632084
1193	0	8568	15026			1.00958e+06	1.00958e+06	1.56338	0.639638
1194	0	8648	15026			390521	390521	1.44935	0.689967
1195	0	8728	15026			225452	225452	1.51	0.662252
1196	0	8808	15026			294376	294376	1.72251	0.580549
1197	0	968	14946			287592	287592	1.23619	0.808935
1198	0	1048	14946			590449	590449	1.15895	0.862847
1199	0	1128	14946			1.57372e+06	1.57372e+06	1.41545	0.706487
1200	0	1208	14946			1339704	1339704	1.53411	0.651842
1201	0	1288	14946			1.67133e+06	1.67133e+06	1.77706	0.562729
1202	0	1368	14946			1.58616e+06	1.58616e+06	1.38687	0.721046
1203	0	1448	14946			1.7247e+06	1.7247e+06	1.58699	0.630123
1204	0	1528	14946			2.4437e+06	2.4437e+06	1.56685	0.638222
1205	0	1608	14946			3445139	3445139	1.36178	0.734334
1206	0	1688	14946			3.68084e+06	3.68084e+06	1.48558	0.673137
1207	0	1768	14946			3.74462e+06	3.74462e+06	1.68124	0.594799
1208	0	1848	14946			2813460	2813460	1.44632	0.691408
1209	0	1928	14946			3.91363e+06	3.91363e+06	1.27358	0.785191
1210	0	2008	14946			5166332	5166332	1.16161	0.860877
1211	0	2088	14946			5409694	5409694	1.13082	0.884311
1212	0	2168	14946			5.89909e+06	5.89909e+06	1.11177	0.89947
1213	0	2248	14946			7.3545e+06	7.3545e+06	0.9572	1.04471
1214	0	2328	14946			7.64705e+06	7.64705e+06	1.06868	0.935733
1215	0	2408	14946			7.80338e+06	7.80338e+06	0.791536	1.26337
1216	0	2488	14946			6123795	6123795	0.926588	1.07923
1217	0	2568	14946			1.44503e+06	1.44503e+06	0.509228	1.96376
1218	0	2648	14946			239232	239232	0.580608	1.72233
1219	0	2728	14946			1.21167e+06	1.21167e+06	0.491419	2.03492
1220	0	2808	14946			1.6499e+06	1.6499e+06	0.535857	1.86617
1221	0	2888	14946			2.20265e+06	2.20265e+06	0.56175	1.78015
1222	0	2968	14946			5.37195e+06	5.37195e+06	0.596829	1.67552
1223	0	3048	14946			6.83539e+06	6.83539e+06	0.545249	1.83403
1224	0	3128	14946			5.40522e+06	5.40522e+06	0.788965	1.26748
1225	0	3208	14946			4583439	4583439	0.667885	1.49726
1226	0	3288	14946			3.11605e+06	3.11605e+06	0.746218	1.34009
1227	0	3368	14946			4.00449e+06	4.00449e+06	0.792587	1.26169
1228	0	3448	14946			3.4556e+06	3.4556e+06	0.829722	1.20522
1229	0	3528	14946			2.44394e+06	2.44394e+06	0.650753	1.53668
1230	0	3608	14946			1.33104e+06	1.33104e+06	0.414606	2.41193
1231	0	3688	14946			888613	888613	0.505154	1.97959
1232	0	3768	14946			992691	992691	0.349954	2.85752
1233	0	3848	14946			909853	909853	0.44706	2.23683
1234	0	3928	14946			628790	628790	0.43698	2.28843
1235	0	4008	14946			509539	509539	0.540739	1.84932
1236	0	4088	14946			1.39781e+06	1.39781e+06	0.590835	1.69252
1237	0	4168	14946			1.38726e+06	1.38726e+06	0.593988	1.68353
1238	0	4248	14946			2.1784e+06	2.1784e+06	0.897377	1.11436
1239	0	4328	14946			1.8388e+06	1.8388e+06	0.764511	1.30803
1240	0	4408	14946			2.3593e+06	2.3593e+06	1.01709	0.983193
1241	0	4488	14946			2683430	2683430	1.13898	0.877978
1242	0	4568	14946			4277505	4277505	1.16657	0.857217
1243	0	4648	14946			3.62273e+06	3.62273e+06	1.04958	0.952763
1244	0	4728	14946			6016947	6016947	1.0614	0.942153
1245	0	4808	14946			6776700	6776700	1.06298	0.940751
1246	0	4888	14946			7.9718e+06	7.9718e+06	0.958828	1.04294
1247	0	4968	14946			6382959	6382959	0.911892	1.09662
1248	0	5048	14946			7.93365e+06	7.93365e+06	0.974776	1.02588
1249	0	5128	14946			3.89863e+06	3.89863e+06	0.952239	1.05016
1250	0	5208	14946			3.73793e+06	3.73793e+06	0.940222	1.06358
1251	0	5288	14946			3212372	3212372	1.1147	0.897099
1252	0	5368	14946			3660747	3660747	1.45783	0.68595
1253	0	5448	14946			3.76172e+06	3.76172e+06	1.33587	0.748575
1254	0	5528	14946			4321479	4321479	1.18309	0.845241
1255	0	5608	14946			4988069	4988069	0.915061	1.09282
1256	0	5688	14946			6.72836e+06	6.72836e+06	0.904528	1.10555
1257	0	5768	14946			5522275	5522275	1.16547	0.858023
1258	0	5848	14946			3.37239e+06	3.37239e+06	1.06619	0.93792
1259	0	5928	14946			2511795	2511795	1.0425	0.959236
1260	0	6008	14946			2.54545e+06	2.54545e+06	0.94537	1.05779
1261	0	6088	14946			2.43207e+06	2.43207e+06	0.76429	1.3084
1262	0	6168	14946			3071035	3071035	0.794603	1.25849
1263	0	6248	14946			4261918	4261918	0.920614	1.08623
1264	0	6328	14946			7.22109e+06	7.22109e+06	1.12487	0.888995
1265	0	6408	14946			8191142	8191142	1.02826	0.972517
1266	0	6488	14946			7021300	7021300	0.982952	1.01734
1267	0	6568	14946			5379435	5379435	0.875218	1.14257
1268	0	6648	14946			6326025	6326025	0.802262	1.24648
1269	0	6728	14946			7513043	7513043	1.12003	0.892833
1270	0	6808	14946			6.77126e+06	6.77126e+06	0.967306	1.0338
1271	0	6888	14946			6.30043e+06	6.30043e+06	1.11999	0.892868
1272	0	6968	14946			5296122	5296122	1.21031	0.826237
1273	0	7048	14946			4.81222e+06	4.81222e+06	1.08565	0.921107
1274	0	7128	14946			5317049	5317049	1.17879	0.848329
1275	0	7208	14946			3532184	3532184	1.2658	0.790014
1276	0	7288	14946			2.82129e+06	2.82129e+06	1.27759	0.782724
1277	0	7368	14946			2.86356e+06	2.86356e+06	1.16322	0.859686
1278	0	7448	14946			3.15507e+06	3.15507e+06	1.5245	0.655953
1279	0	7528	14946			2.2992e+06	2.2992e+06	1.69511	0.589933
1280	0	7608	14946			3.67589e+06	3.67589e+06	1.44484	0.692118
1281	0	7688	14946			3.91494e+06	3.91494e+06	1.34504	0.743474
1282	0	7768	14946			3177870	3177870	1.45544	0.687077
1283	0	7848	14946			2793875	2793875	1.86738	0.53551
1284	0	7928	14946			2.5425e+06	2.5425e+06	1.53919	0.649694
1285	0	8008	14946			2.3463e+06	2.3463e+06	1.67063	0.598578
1286	0	8088	14946			2.38145e+06	2.38145e+06	1.77242	0.5642
1287	0	8168	14946			2.19493e+06	2.19493e+06	1.81578	0.550729
1288	0	8248	14946			1.91383e+06	1.91383e+06	1.9467	0.513689
1289	0	8328	14946			1.23905e+06	1.23905e+06	1.41212	0.708154
1290	0	8408	14946			1420846	1420846	1.53787	0.650251
1291	0	8488	14946			1.11094e+06	1.11094e+06	1.28226	0.779875
1292	0	8568	14946			904415	904415	1.5723	0.636011
1293	0	8648	14946			789918	789918	2.01423	0.496467
1294	0	8728	14946			516126	516126	1.39052	0.719154
1295	0	8808	14946			263521	263521	1.48271	0.674439
1296	0	8888	14946			114978	114978	1.61089	0.620775
1297	0	968	14866			353565	353565	1.16515	0.858255
1298	0	1048	14866			581898	581898	1.34635	0.742749
1299	0	1128	14866			1.3791e+06	1.3791e+06	1.4151	0.706662
1300	0	1208	14866			2350410	2350410	1.36696	0.731548
1301	0	1288	14866			1.82279e+06	1.82279e+06	1.72243	0.580576
1302	0	1368	14866			2.5762e+06	2.5762e+06	1.56074	0.640722
1303	0	1448	14866			3048300	3048300	1.51097	0.661826
1304	0	1528	14866			2.64922e+06	2.64922e+06	1.73394	0.57672
1305	0	1608	14866			3.1751e+06	3.1751e+06	1.46613	0.682068
1306	0	1688	14866			3.89034e+06	3.89034e+06	1.79894	0.555882
1307	0	1768	14866			4270650	4270650	1.39588	0.716392
1308	0	1848	14866			4.3758e+06	4.3758e+06	1.23404	0.810349
1309	0	1928	14866			4272457	4272457	1.61092	0.620763
1310	0	2008	14866			4.8413e+06	4.8413e+06	1.25203	0.798704
1311	0	2088	14866			6275331	6275331	1.31785	0.758813
1312	0	2168	14866			7.06563e+06	7.06563e+06	1.05098	0.951496
1313	0	2248	14866			8768275	8768275	0.938776	1.06522
1314	0	2328	14866			7034395	7034395	0.817968	1.22254
1315	0	2408	14866			5.25176e+06	5.25176e+06	0.701553	1.42541
1316	0	2488	14866			2778933	2778933	0.536153	1.86514
1317	0	2568	14866			1.04476e+06	1.04476e+06	0.441626	2.26436
1318	0	2648	14866			1.27226e+06	1.27226e+06	0.397075	2.51842
1319	0	2728	14866			1.20695e+06	1.20695e+06	0.423903	2.35903
1320	0	2808	14866			1.59688e+06	1.59688e+06	0.443287	2.25588
1321	0	2888	14866			3.8818e+06	3.8818e+06	0.443505	2.25477
1322	0	2968	14866			7.16134e+06	7.16134e+06	0.620996	1.61032
1323	0	3048	14866			5311640	5311640	0.55026	1.81732
1324	0	3128	14866			3.80569e+06	3.80569e+06	0.611382	1.63564
1325	0	3208	14866			4013528	4013528	0.699138	1.43033
1326	0	3288	14866			3.71219e+06	3.71219e+06	0.726583	1.3763
1327	0	3368	14866			2.7199e+06	2.7199e+06	0.751102	1.33138
1328	0	3448	14866			2.51731e+06	2.51731e+06	0.77987	1.28227
1329	0	3528	14866			2158153	2158153	0.71545	1.39772
1330	0	3608	14866			1.36899e+06	1.36899e+06	0.543658	1.83939
1331	0	3688	14866			284265	284265	0.495479	2.01825
1332	0	3768	14866			412170	412170	0.449298	2.2257
1333	0	3848	14866			1.40174e+06	1.40174e+06	0.708961	1.41051
1334	0	3928	14866			1.74247e+06	1.74247e+06	0.604844	1.65332
1335	0	4008	14866			1.72743e+06	1.72743e+06	0.629554	1.58843
1336	0	4088	14866			1.81153e+06	1.81153e+06	0.800293	1.24954
1337	0	4168	14866			1.9782e+06	1.9782e+06	0.878215	1.13867
1338	0	4248	14866			2.0296e+06	2.0296e+06	0.854429	1.17037
1339	0	4328	14866			2.49162e+06	2.49162e+06	0.832593	1.20107
1340	0	4408	14866			2.63824e+06	2.63824e+06	0.844417	1.18425
1341	0	4488	14866			2.71194e+06	2.71194e+06	1.1524	0.867754
1342	0	4568	14866			2.23447e+06	2.23447e+06	0.879869	1.13653
1343	0	4648	14866			3.35916e+06	3.35916e+06	0.895135	1.11715
1344	0	4728	14866			3.52041e+06	3.52041e+06	1.09228	0.915516
1345	0	4808	14866			5377898	5377898	1.00478	0.995248
1346	0	4888	14866			6.06982e+06	6.06982e+06	1.0902	0.917261
1347	0	4968	14866			4.24454e+06	4.24454e+06	1.03479	0.966383
1348	0	5048	14866			3.09391e+06	3.09391e+06	0.957625	1.04425
1349	0	5128	14866			3.10258e+06	3.10258e+06	1.06603	0.938058
1350	0	5208	14866			3.04799e+06	3.04799e+06	1.02479	0.975805
1351	0	5288	14866			2603076	2603076	1.3443	0.743881
1352	0	5368	14866			3152082	3152082	0.833467	1.19981
1353	0	5448	14866			3383833	3383833	1.18136	0.846481
1354	0	5528	14866			4.37869e+06	4.37869e+06	1.06233	0.941328
1355	0	5608	14866			6.01844e+06	6.01844e+06	0.933367	1.07139
1356	0	5688	14866			7.03423e+06	7.03423e+06	0.873944	1.14424
1357	0	5768	14866			7701884	7701884	0.711407	1.40567
1358	0	5848	14866			7256127	7256127	0.862665	1.1592
1359	0	5928	14866			2.67424e+06	2.67424e+06	1.08553	0.921207
1360	0	6008	14866			2.28564e+06	2.28564e+06	0.865266	1.15571
1361	0	6088	14866			3.96127e+06	3.96127e+06	1.02264	0.977861
1362	0	6168	14866			3.1294e+06	3.1294e+06	0.761145	1.31381
1363	0	6248	14866			2.30285e+06	2.30285e+06	0.783552	1.27624
1364	0	6328	14866			3119163	3119163	0.956581	1.04539
1365	0	6408	14866			3.5183e+06	3.5183e+06	0.972414	1.02837
1366	0	6488	14866			5.96443e+06	5.96443e+06	1.07726	0.928283
1367	0	6568	14866			6.1453e+06	6.1453e+06	0.825965	1.21071
1368	0	6648	14866			6415670	6415670	0.704837	1.41877
1369	0	6728	14866			5.95385e+06	5.95385e+06	0.805183	1.24195
1370	0	6808	14866			7423216	7423216	0.97258	1.02819
1371	0	6888	14866			6894318	6894318	1.01051	0.989596
1372	0	6968	14866			6241013	6241013	0.894677	1.11772
1373	0	7048	14866			4207163	4207163	0.806774	1.2395
1374	0	7128	14866			3.9787e+06	3.9787e+06	0.967267	1.03384
1375	0	7208	14866			4.56322e+06	4.56322e+06	1.12898	0.885756
1376	0	7288	14866			2.72223e+06	2.72223e+06	1.1997	0.833539
1377	0	7368	14866			3.59247e+06	3.59247e+06	1.43345	0.697619
1378	0	7448	14866			2881499	2881499	1.46593	0.68216
1379	0	7528	14866			2.88765e+06	2.88765e+06	1.44118	0.693874
1380	0	7608	14866			3.7138e+06	3.7138e+06	1.42625	0.701139
1381	0	7688	14866			3.02298e+06	3.02298e+06	1.4024	0.713064
1382	0	7768	14866			3.27021e+06	3.27021e+06	1.66015	0.602357
1383	0	7848	14866			3.60183e+06	3.60183e+06	1.59333	0.627617
1384	0	7928	14866			2825319	2825319	1.89171	0.528621
1385	0	8008	14866			2.40982e+06	2.40982e+06	1.47109	0.67977
1386	0	8088	14866			2222074	2222074	1.71126	0.584363
1387	0	8168	14866			2.3395e+06	2.3395e+06	1.79877	0.555937
1388	0	8248	14866			2.35016e+06	2.35016e+06	1.52936	0.653867
1389	0	8328	14866			2009741	2009741	1.39661	0.716019
1390	0	8408	14866			1.0014e+06	1.0014e+06	1.02516	0.975455
1391	0	8488	14866			1356441	1356441	1.56506	0.638953
1392	0	8568	14866			1.15566e+06	1.15566e+06	1.68508	0.593442
1393	0	8648	14866			1.07652e+06	1.07652e+06	1.56261	0.639953
1394	0	8728	14866			556675	556675	1.62806	0.614227
1395	0	8808	14866			587088	587088	1.58592	0.63055
1396	0	8888	14866			291785	291785	1.68306	0.594158
1397	0	8968	14866			133258	133258	1.09603	0.912388
1398	0	9048	14866			0	1832.88	1.91471	0.522272
1399	0	888	14786			0	1832.88	1.01077	0.989342
1400	0	968	14786			552253	552253	1.39352	0.717609
1401	0	1048	14786			1.0054e+06	1.0054e+06	1.48811	0.671994
1402	0	1128	14786			1908390	1908390	1.50605	0.663988
1403	0	1208	14786			2.55724e+06	2.55724e+06	1.7097	0.584897
1404	0	1288	14786			2096719	2096719	1.5921	0.628102
1405	0	1368	14786			2374594	2374594	1.58532	0.630788
1406	0	1448	14786			3091870	3091870	1.33157	0.750995
1407	0	1528	14786			3.24838e+06	3.24838e+06	1.70347	0.587036
1408	0	1608	14786			3.2508e+06	3.2508e+06	1.95244	0.512179
1409	0	1688	14786			3.23466e+06	3.23466e+06	1.06872	0.935702
1410	0	1768	14786			4616537	4616537	1.02871	0.972092
1411	0	1848	14786			5088805	5088805	1.47962	0.675849
1412	0	1928	14786			4869005	4869005	1.09178	0.915935
1413	0	2008	14786			2.83563e+06	2.83563e+06	0.796384	1.25568
1414	0	2088	14786			2005767	2005767	0.716653	1.39538
1415	0	2168	14786			6.0016e+06	6.0016e+06	1.09251	0.915322
1416	0	2248	14786			5807789	5807789	0.739392	1.35246
1417	0	2328	14786			6.43611e+06	6.43611e+06	0.618988	1.61554
1418	0	2408	14786			3593163	3593163	0.430277	2.32408
1419	0	2488	14786			1943970	1943970	0.467989	2.1368
1420	0	2568	14786			1444739	1444739	0.437706	2.28464
1421	0	2648	14786			1.51824e+06	1.51824e+06	0.414274	2.41386
1422	0	2728	14786			1.37866e+06	1.37866e+06	0.410413	2.43657
1423	0	2808	14786			1.76185e+06	1.76185e+06	0.327871	3.04998
1424	0	2888	14786			4.28407e+06	4.28407e+06	0.485072	2.06155
1425	0	2968	14786			5.6097e+06	5.6097e+06	0.490567	2.03846
1426	0	3048	14786			3.44681e+06	3.44681e+06	0.514247	1.94459
1427	0	3128	14786			3.46847e+06	3.46847e+06	0.565614	1.76799
1428	0	3208	14786			2.88032e+06	2.88032e+06	0.51512	1.94129
1429	0	3288	14786			2.89449e+06	2.89449e+06	0.493431	2.02663
1430	0	3368	14786			2.46666e+06	2.46666e+06	0.714829	1.39894
1431	0	3448	14786			2096444	2096444	0.619197	1.615
1432	0	3528	14786			1.67097e+06	1.67097e+06	0.57128	1.75046
1433	0	3608	14786			1.33116e+06	1.33116e+06	0.460121	2.17334
1434	0	3688	14786			1.07457e+06	1.07457e+06	0.557691	1.79311
1435	0	3768	14786			1.19331e+06	1.19331e+06	0.585587	1.70769
1436	0	3848	14786			2.05526e+06	2.05526e+06	0.816664	1.22449
1437	0	3928	14786			2.09446e+06	2.09446e+06	0.824605	1.2127
1438	0	4008	14786			2.30906e+06	2.30906e+06	1.01492	0.985301
1439	0	4088	14786			2.1702e+06	2.1702e+06	0.929306	1.07607
1440	0	4168	14786			2.03084e+06	2.03084e+06	0.923512	1.08282
1441	0	4248	14786			1.69598e+06	1.69598e+06	1.01058	0.98953
1442	0	4328	14786			1.96723e+06	1.96723e+06	1.09963	0.909398
1443	0	4408	14786			2.25947e+06	2.25947e+06	0.939875	1.06397
1444	0	4488	14786			2.41014e+06	2.41014e+06	0.967598	1.03349
1445	0	4568	14786			2.26129e+06	2.26129e+06	0.991332	1.00874
1446	0	4648	14786			2.99884e+06	2.99884e+06	0.937865	1.06625
1447	0	4728	14786			2.12548e+06	2.12548e+06	0.977448	1.02307
1448	0	4808	14786			2354131	2354131	1.06076	0.942722
1449	0	4888	14786			2.65084e+06	2.65084e+06	1.1404	0.876886
1450	0	4968	14786			2.49162e+06	2.49162e+06	1.19668	0.835648
1451	0	5048	14786			3073648	3073648	0.934004	1.07066
1452	0	5128	14786			2875547	2875547	1.06506	0.938913
1453	0	5208	14786			3147539	3147539	1.04149	0.96016
1454	0	5288	14786			3.14222e+06	3.14222e+06	1.16157	0.860907
1455	0	5368	14786			3.40519e+06	3.40519e+06	1.00396	0.996056
1456	0	5448	14786			3.80293e+06	3.80293e+06	0.940852	1.06287
1457	0	5528	14786			3.92316e+06	3.92316e+06	1.03381	0.967294
1458	0	5608	14786			5985162	5985162	1.06358	0.940221
1459	0	5688	14786			8406157	8406157	0.954682	1.04747
1460	0	5768	14786			10325164	10325164	1.03834	0.963076
1461	0	5848	14786			8646090	8646090	0.716663	1.39536
1462	0	5928	14786			6.77562e+06	6.77562e+06	0.758032	1.3192
1463	0	6008	14786			3545479	3545479	0.951159	1.05135
1464	0	6088	14786			2.77222e+06	2.77222e+06	1.0627	0.941002
1465	0	6168	14786			2.74623e+06	2.74623e+06	0.941673	1.06194
1466	0	6248	14786			3198385	3198385	1.07583	0.929519
1467	0	6328	14786			3.23985e+06	3.23985e+06	0.876518	1.14088
1468	0	6408	14786			2.50666e+06	2.50666e+06	1.0107	0.989411
1469	0	6488	14786			2.22444e+06	2.22444e+06	1.02485	0.975754
1470	0	6568	14786			4.64978e+06	4.64978e+06	1.10637	0.903859
1471	0	6648	14786			8705150	8705150	0.900448	1.11056
1472	0	6728	14786			7.24344e+06	7.24344e+06	0.855369	1.16909
1473	0	6808	14786			7.21703e+06	7.21703e+06	1.00225	0.997752
1474	0	6888	14786			6145901	6145901	0.954569	1.04759
1475	0	6968	14786			5770781	5770781	0.907592	1.10182
1476	0	7048	14786			6383330	6383330	0.851271	1.17471
1477	0	7128	14786			7254173	7254173	0.973608	1.02711
1478	0	7208	14786			6.00259e+06	6.00259e+06	1.02274	0.977768
1479	0	7288	14786			6.17684e+06	6.17684e+06	1.28074	0.780796
1480	0	7368	14786			4.74416e+06	4.74416e+06	1.3062	0.765579
1481	0	7448	14786			4716421	4716421	1.15864	0.863078
1482	0	7528	14786			4.14476e+06	4.14476e+06	1.40826	0.710096
1483	0	7608	14786			3.97802e+06	3.97802e+06	1.37974	0.724776
1484	0	7688	14786			3.70244e+06	3.70244e+06	1.30939	0.763715
1485	0	7768	14786			3.5461e+06	3.5461e+06	1.45061	0.689364
1486	0	7848	14786			2.70459e+06	2.70459e+06	1.63518	0.611554
1487	0	7928	14786			3.77505e+06	3.77505e+06	1.82609	0.547617
1488	0	8008	14786			3.07527e+06	3.07527e+06	1.71843	0.581927
1489	0	8088	14786			2.72635e+06	2.72635e+06	1.80177	0.55501
1490	0	8168	14786			2781794	2781794	1.7545	0.569962
1491	0	8248	14786			2.40043e+06	2.40043e+06	1.8862	0.530167
1492	0	8328	14786			1.1721e+06	1.1721e+06	1.26319	0.791647
1493	0	8408	14786			1.70928e+06	1.70928e+06	1.72979	0.578105
1494	0	8488	14786			2.21737e+06	2.21737e+06	1.64545	0.607736
1495	0	8568	14786			2.12653e+06	2.12653e+06	1.56891	0.637385
1496	0	8648	14786			1.1881e+06	1.1881e+06	1.62128	0.616797
1497	0	8728	14786			1.20144e+06	1.20144e+06	1.9841	0.504006
1498	0	8808	14786			809419	809419	1.6948	0.59004
1499	0	8888	14786			488972	488972	1.87888	0.532233
1500	0	8968	14786			201638	201638	1.61269	0.620081
1501	0	9048	14786			141593	141593	1.24994	0.80004
1502	0	9128	14786			40993.8	40993.8	1.1228	0.890631
1503	0	808	14706			237174	237174	1.1267	0.887551
1504	0	888	14706			0	1832.88	1.16029	0.861857
1505	0	968	14706			64265.4	64265.4	1.00221	0.997799
1506	0	1048	14706			554615	554615	1.1983	0.834517
1507	0	1128	14706			1389394	1389394	1.6002	0.624924
1508	0	1208	14706			1.80519e+06	1.80519e+06	1.40115	0.713698
1509	0	1288	14706			2.25407e+06	2.25407e+06	1.79944	0.555728
1510	0	1368	14706			2.15961e+06	2.15961e+06	1.09853	0.910304
1511	0	1448	14706			1.8309e+06	1.8309e+06	1.48817	0.671964
1512	0	1528	14706			3.538e+06	3.538e+06	1.30441	0.766628
1513	0	1608	14706			3.44306e+06	3.44306e+06	1.01408	0.986116
1514	0	1688	14706			4094719	4094719	1.42786	0.700349
1515	0	1768	14706			6179939	6179939	1.55468	0.643218
1516	0	1848	14706			7.67224e+06	7.67224e+06	1.14276	0.875073
1517	0	1928	14706			6.19564e+06	6.19564e+06	1.33828	0.747226
1518	0	2008	14706			1.00624e+06	1.00624e+06	0.640143	1.56215
1519	0	2088	14706			114448	114448	0.577148	1.73266
1520	0	2168	14706			4.90047e+06	4.90047e+06	0.55601	1.79853
1521	0	2248	14706			6.44774e+06	6.44774e+06	0.670859	1.49063
1522	0	2328	14706			3819271	3819271	0.589021	1.69773
1523	0	2408	14706			2.0269e+06	2.0269e+06	0.433826	2.30507
1524	0	2488	14706			2.2728e+06	2.2728e+06	0.45666	2.18981
1525	0	2568	14706			1.55801e+06	1.55801e+06	0.343444	2.91168
1526	0	2648	14706			1.52548e+06	1.52548e+06	0.34251	2.91962
1527	0	2728	14706			786037	786037	0.306725	3.26025
1528	0	2808	14706			44552.3	44552.3	0.270277	3.6999
1529	0	2888	14706			3.19823e+06	3.19823e+06	0.514903	1.94211
1530	0	2968	14706			4675510	4675510	0.485755	2.05865
1531	0	3048	14706			4.15534e+06	4.15534e+06	0.479054	2.08745
1532	0	3128	14706			3.84233e+06	3.84233e+06	0.497594	2.00967
1533	0	3208	14706			2731899	2731899	0.467427	2.13937
1534	0	3288	14706			2.50377e+06	2.50377e+06	0.560097	1.78541
1535	0	3368	14706			2.38453e+06	2.38453e+06	0.597973	1.67232
1536	0	3448	14706			2.28245e+06	2.28245e+06	0.539813	1.85249
1537	0	3528	14706			1.79953e+06	1.79953e+06	0.503988	1.98417
1538	0	3608	14706			1.59476e+06	1.59476e+06	0.491866	2.03307
1539	0	3688	14706			1.99194e+06	1.99194e+06	0.551956	1.81174
1540	0	3768	14706			2.1796e+06	2.1796e+06	0.6863	1.45709
1541	0	3848	14706			2.32232e+06	2.32232e+06	0.792235	1.26225
1542	0	3928	14706			2.8323e+06	2.8323e+06	0.954331	1.04785
1543	0	4008	14706			2.90102e+06	2.90102e+06	1.03638	0.964901
1544	0	4088	14706			2936129	2936129	0.9057	1.10412
1545	0	4168	14706			2.3808e+06	2.3808e+06	0.872127	1.14662
1546	0	4248	14706			1757296	1757296	0.847934	1.17934
1547	0	4328	14706			2.13397e+06	2.13397e+06	1.00125	0.998756
1548	0	4408	14706			1.945e+06	1.945e+06	1.08462	0.921985
1549	0	4488	14706			2102172	2102172	1.0244	0.976179
1550	0	4568	14706			2.36797e+06	2.36797e+06	0.973243	1.02749
1551	0	4648	14706			2.07075e+06	2.07075e+06	1.0169	0.983381
1552	0	4728	14706			2.20343e+06	2.20343e+06	1.06602	0.938067
1553	0	4808	14706			2101724	2101724	1.09172	0.915989
1554	0	4888	14706			2234523	2234523	0.991913	1.00815
1555	0	4968	14706			2.50796e+06	2.50796e+06	1.12853	0.886108
1556	0	5048	14706			2.54625e+06	2.54625e+06	1.06813	0.936218
1557	0	5128	14706			2716665	2716665	0.975477	1.02514
1558	0	5208	14706			3.08519e+06	3.08519e+06	1.19157	0.839227
1559	0	5288	14706			2542621	2542621	1.44803	0.690593
1560	0	5368	14706			3.23622e+06	3.23622e+06	1.33812	0.747317
1561	0	5448	14706			4.37532e+06	4.37532e+06	1.1594	0.862518
1562	0	5528	14706			5.2866e+06	5.2866e+06	0.931928	1.07304
1563	0	5608	14706			6.56132e+06	6.56132e+06	0.78488	1.27408
1564	0	5688	14706			7693748	7693748	0.797989	1.25315
1565	0	5768	14706			9097016	9097016	0.903689	1.10657
1566	0	5848	14706			9119257	9119257	0.912259	1.09618
1567	0	5928	14706			9128931	9128931	0.871406	1.14757
1568	0	6008	14706			7.28024e+06	7.28024e+06	0.693615	1.44172
1569	0	6088	14706			3.41872e+06	3.41872e+06	0.976275	1.0243
1570	0	6168	14706			3.27818e+06	3.27818e+06	0.936115	1.06824
1571	0	6248	14706			3.32933e+06	3.32933e+06	1.05336	0.949341
1572	0	6328	14706			2.59494e+06	2.59494e+06	0.936147	1.06821
1573	0	6408	14706			3310270	3310270	0.945767	1.05734
1574	0	6488	14706			3.26597e+06	3.26597e+06	1.05844	0.944783
1575	0	6568	14706			3.34981e+06	3.34981e+06	1.07836	0.927333
1576	0	6648	14706			5235391	5235391	0.942756	1.06072
1577	0	6728	14706			7064400	7064400	0.878348	1.1385
1578	0	6808	14706			6.30289e+06	6.30289e+06	0.87932	1.13724
1579	0	6888	14706			7069456	7069456	0.805803	1.241
1580	0	6968	14706			7.2406e+06	7.2406e+06	1.05291	0.949746
1581	0	7048	14706			6.43992e+06	6.43992e+06	0.828327	1.20725
1582	0	7128	14706			7.0356e+06	7.0356e+06	0.915039	1.09285
1583	0	7208	14706			6254900	6254900	0.844547	1.18407
1584	0	7288	14706			7.54512e+06	7.54512e+06	1.06067	0.942804
1585	0	7368	14706			5460160	5460160	1.0398	0.961726
1586	0	7448	14706			5402389	5402389	1.24342	0.804232
1587	0	7528	14706			4531741	4531741	1.28641	0.777355
1588	0	7608	14706			3.89387e+06	3.89387e+06	1.5807	0.632631
1589	0	7688	14706			2.7961e+06	2.7961e+06	1.31097	0.762794
1590	0	7768	14706			4299844	4299844	1.71938	0.581604
1591	0	7848	14706			3921040	3921040	1.56754	0.637943
1592	0	7928	14706			3.42233e+06	3.42233e+06	1.61135	0.620598
1593	0	8008	14706			3.99167e+06	3.99167e+06	1.74578	0.57281
1594	0	8088	14706			2872564	2872564	1.70158	0.58769
1595	0	8168	14706			2.60042e+06	2.60042e+06	1.60819	0.621816
1596	0	8248	14706			3.24165e+06	3.24165e+06	1.81834	0.549954
1597	0	8328	14706			2.49652e+06	2.49652e+06	1.70434	0.586739
1598	0	8408	14706			2.20412e+06	2.20412e+06	1.83816	0.544022
1599	0	8488	14706			2351641	2351641	1.77088	0.564692
1600	0	8568	14706			2.13512e+06	2.13512e+06	1.73194	0.577386
1601	0	8648	14706			1.60525e+06	1.60525e+06	1.60821	0.621809
1602	0	8728	14706			1991717	1991717	1.44255	0.693215
1603	0	8808	14706			1.2312e+06	1.2312e+06	1.53015	0.653532
1604	0	8888	14706			846700	846700	1.61584	0.618872
1605	0	8968	14706			447356	447356	1.44724	0.69097
1606	0	9048	14706			240141	240141	1.31187	0.762273
1607	0	9128	14706			148093	148093	1.77291	0.564044
1608	0	728	14626			0	1832.88	0.00406001	246.305
1609	0	808	14626			0	1832.88	1.71381	0.583494
1610	0	888	14626			106472	106472	1.39331	0.717716
1611	0	968	14626			0	1832.88	0.768393	1.30142
1612	0	1048	14626			93591.1	93591.1	0.602527	1.65968
1613	0	1128	14626			223870	223870	0.888994	1.12487
1614	0	1208	14626			906877	906877	0.957459	1.04443
1615	0	1288	14626			1.64139e+06	1.64139e+06	1.32385	0.755371
1616	0	1368	14626			1.4501e+06	1.4501e+06	1.26853	0.788316
1617	0	1448	14626			3.55889e+06	3.55889e+06	1.49673	0.668122
1618	0	1528	14626			3.83328e+06	3.83328e+06	1.3395	0.746546
1619	0	1608	14626			3.53865e+06	3.53865e+06	1.38894	0.719975
1620	0	1688	14626			4.45828e+06	4.45828e+06	1.77195	0.564351
1621	0	1768	14626			5.05275e+06	5.05275e+06	1.14562	0.872887
1622	0	1848	14626			8.2336e+06	8.2336e+06	0.987805	1.01235
1623	0	1928	14626			8360357	8360357	0.91309	1.09518
1624	0	2008	14626			4914384	4914384	0.65426	1.52845
1625	0	2088	14626			4.2524e+06	4.2524e+06	0.513712	1.94662
1626	0	2168	14626			4.76808e+06	4.76808e+06	0.660018	1.51511
1627	0	2248	14626			4107686	4107686	0.802286	1.24644
1628	0	2328	14626			2.80848e+06	2.80848e+06	0.507045	1.97221
1629	0	2408	14626			1.85225e+06	1.85225e+06	0.384106	2.60345
1630	0	2488	14626			1.65891e+06	1.65891e+06	0.448684	2.22874
1631	0	2568	14626			1.59551e+06	1.59551e+06	0.397736	2.51423
1632	0	2648	14626			1.55653e+06	1.55653e+06	0.351998	2.84093
1633	0	2728	14626			1.22991e+06	1.22991e+06	0.359435	2.78215
1634	0	2808	14626			2.64272e+06	2.64272e+06	0.421156	2.37442
1635	0	2888	14626			4.23651e+06	4.23651e+06	0.388337	2.57508
1636	0	2968	14626			6579040	6579040	0.487466	2.05143
1637	0	3048	14626			7639703	7639703	0.436154	2.29277
1638	0	3128	14626			6011009	6011009	0.544171	1.83766
1639	0	3208	14626			3.30505e+06	3.30505e+06	0.565164	1.7694
1640	0	3288	14626			3.52224e+06	3.52224e+06	0.627267	1.59422
1641	0	3368	14626			2.85066e+06	2.85066e+06	0.531198	1.88254
1642	0	3448	14626			2.44015e+06	2.44015e+06	0.515162	1.94114
1643	0	3528	14626			2651463	2651463	0.603954	1.65575
1644	0	3608	14626			2.44955e+06	2.44955e+06	0.549798	1.81885
1645	0	3688	14626			2.87599e+06	2.87599e+06	0.7715	1.29618
1646	0	3768	14626			2.65547e+06	2.65547e+06	1.02953	0.97132
1647	0	3848	14626			2.4831e+06	2.4831e+06	0.973974	1.02672
1648	0	3928	14626			2.72353e+06	2.72353e+06	0.876906	1.14037
1649	0	4008	14626			2.63611e+06	2.63611e+06	0.913507	1.09468
1650	0	4088	14626			2.7307e+06	2.7307e+06	1.02977	0.971092
1651	0	4168	14626			2.38468e+06	2.38468e+06	1.10319	0.906466
1652	0	4248	14626			2481596	2481596	0.843658	1.18531
1653	0	4328	14626			2.0286e+06	2.0286e+06	1.09822	0.910564
1654	0	4408	14626			2.90975e+06	2.90975e+06	0.99098	1.0091
1655	0	4488	14626			2.26498e+06	2.26498e+06	0.994892	1.00513
1656	0	4568	14626			2.26389e+06	2.26389e+06	1.09511	0.91315
1657	0	4648	14626			2.12834e+06	2.12834e+06	0.958106	1.04373
1658	0	4728	14626			2160854	2160854	0.899385	1.11187
1659	0	4808	14626			2160412	2160412	1.10013	0.908986
1660	0	4888	14626			2.40225e+06	2.40225e+06	1.04681	0.95528
1661	0	4968	14626			1.94659e+06	1.94659e+06	1.06574	0.938313
1662	0	5048	14626			1.90835e+06	1.90835e+06	1.00552	0.994508
1663	0	5128	14626			2449105	2449105	1.04196	0.959734
1664	0	5208	14626			2.81017e+06	2.81017e+06	1.09897	0.909939
1665	0	5288	14626			3258238	3258238	1.14208	0.875595
1666	0	5368	14626			4488438	4488438	1.00694	0.993103
1667	0	5448	14626			6.39183e+06	6.39183e+06	0.87786	1.13913
1668	0	5528	14626			5.81241e+06	5.81241e+06	0.995257	1.00477
1669	0	5608	14626			7485659	7485659	0.823262	1.21468
1670	0	5688	14626			5.39583e+06	5.39583e+06	0.757518	1.3201
1671	0	5768	14626			7.1566e+06	7.1566e+06	0.729864	1.37012
1672	0	5848	14626			9040824	9040824	0.796706	1.25517
1673	0	5928	14626			7.29136e+06	7.29136e+06	0.825178	1.21186
1674	0	6008	14626			7380070	7380070	0.82997	1.20486
1675	0	6088	14626			5.19484e+06	5.19484e+06	1.01003	0.990074
1676	0	6168	14626			3.38868e+06	3.38868e+06	0.882994	1.13251
1677	0	6248	14626			2787339	2787339	0.728306	1.37305
1678	0	6328	14626			3423084	3423084	0.960894	1.0407
1679	0	6408	14626			3.30681e+06	3.30681e+06	0.908906	1.10022
1680	0	6488	14626			3.47184e+06	3.47184e+06	0.800857	1.24866
1681	0	6568	14626			4.02042e+06	4.02042e+06	1.11816	0.894324
1682	0	6648	14626			6.1892e+06	6.1892e+06	0.862826	1.15898
1683	0	6728	14626			5215645	5215645	0.828791	1.20658
1684	0	6808	14626			8066979	8066979	0.963795	1.03757
1685	0	6888	14626			8999744	8999744	0.915117	1.09276
1686	0	6968	14626			5884101	5884101	0.925437	1.08057
1687	0	7048	14626			5714236	5714236	0.95647	1.04551
1688	0	7128	14626			6.9264e+06	6.9264e+06	1.03082	0.970105
1689	0	7208	14626			7.74316e+06	7.74316e+06	1.45564	0.686982
1690	0	7288	14626			7.33969e+06	7.33969e+06	1.29034	0.77499
1691	0	7368	14626			6397958	6397958	1.27524	0.784168
1692	0	7448	14626			7.15071e+06	7.15071e+06	1.23063	0.812594
1693	0	7528	14626			5.88922e+06	5.88922e+06	1.33	0.751881
1694	0	7608	14626			4.11105e+06	4.11105e+06	1.01178	0.988354
1695	0	7688	14626			5598916	5598916	1.38243	0.723366
1696	0	7768	14626			5373602	5373602	1.3344	0.749402
1697	0	7848	14626			4.59034e+06	4.59034e+06	1.46335	0.683362
1698	0	7928	14626			4.19357e+06	4.19357e+06	1.44552	0.691795
1699	0	8008	14626			3.90196e+06	3.90196e+06	1.31205	0.762165
1700	0	8088	14626			4003354	4003354	1.53307	0.652286
1701	0	8168	14626			3.63892e+06	3.63892e+06	1.73626	0.57595
1702	0	8248	14626			2794342	2794342	1.70123	0.587809
1703	0	8328	14626			2.79561e+06	2.79561e+06	2.02965	0.492696
1704	0	8408	14626			1.92482e+06	1.92482e+06	1.74327	0.573636
1705	0	8488	14626			2.34387e+06	2.34387e+06	2.07756	0.481334
1706	0	8568	14626			2.30987e+06	2.30987e+06	1.52465	0.655887
1707	0	8648	14626			2.76622e+06	2.76622e+06	1.58327	0.631603
1708	0	8728	14626			1.6921e+06	1.6921e+06	1.97691	0.505839
1709	0	8808	14626			1.26613e+06	1.26613e+06	1.52242	0.656847
1710	0	8888	14626			1.16759e+06	1.16759e+06	2.18754	0.457135
1711	0	8968	14626			710053	710053	1.6397	0.609868
1712	0	9048	14626			439720	439720	1.61985	0.61734
1713	0	9128	14626			587003	587003	1.48033	0.675527
1714	0	728	14546			0	1832.88	1.37793	0.725726
1715	0	808	14546			236025	236025	1.72341	0.580245
1716	0	888	14546			253422	253422	1.33216	0.75066
1717	0	968	14546			251902	251902	1.01194	0.988198
1718	0	1048	14546			277011	277011	0.967406	1.03369
1719	0	1128	14546			342513	342513	0.891987	1.12109
1720	0	1208	14546			569338	569338	1.0423	0.959418
1721	0	1288	14546			2.29e+06	2.29e+06	1.25924	0.794128
1722	0	1368	14546			3175099	3175099	1.19397	0.837545
1723	0	1448	14546			3.36195e+06	3.36195e+06	1.31297	0.761634
1724	0	1528	14546			3.45216e+06	3.45216e+06	1.51803	0.658749
1725	0	1608	14546			4346247	4346247	0.896536	1.1154
1726	0	1688	14546			4555232	4555232	1.27968	0.781443
1727	0	1768	14546			7177894	7177894	0.982957	1.01734
1728	0	1848	14546			9246141	9246141	0.773972	1.29204
1729	0	1928	14546			7818370	7818370	0.833132	1.20029
1730	0	2008	14546			8183608	8183608	0.704273	1.4199
1731	0	2088	14546			5.3698e+06	5.3698e+06	0.834159	1.19881
1732	0	2168	14546			6294745	6294745	0.730101	1.36967
1733	0	2248	14546			4575679	4575679	0.504663	1.98152
1734	0	2328	14546			2.08232e+06	2.08232e+06	0.423804	2.35958
1735	0	2408	14546			2.33969e+06	2.33969e+06	0.472431	2.11671
1736	0	2488	14546			2807768	2807768	0.43362	2.30617
1737	0	2568	14546			1.81046e+06	1.81046e+06	0.327286	3.05543
1738	0	2648	14546			1.9723e+06	1.9723e+06	0.37283	2.68219
1739	0	2728	14546			2225537	2225537	0.317978	3.14487
1740	0	2808	14546			5334936	5334936	0.491533	2.03445
1741	0	2888	14546			6488197	6488197	0.51019	1.96005
1742	0	2968	14546			6918511	6918511	0.590647	1.69306
1743	0	3048	14546			7.90867e+06	7.90867e+06	0.636639	1.57075
1744	0	3128	14546			6271991	6271991	0.628342	1.59149
1745	0	3208	14546			6227661	6227661	0.597598	1.67337
1746	0	3288	14546			4286013	4286013	0.630906	1.58502
1747	0	3368	14546			4.74556e+06	4.74556e+06	0.531952	1.87987
1748	0	3448	14546			4.38177e+06	4.38177e+06	0.543184	1.841
1749	0	3528	14546			3774146	3774146	0.679772	1.47108
1750	0	3608	14546			3.29542e+06	3.29542e+06	0.721054	1.38686
1751	0	3688	14546			3.49778e+06	3.49778e+06	0.613897	1.62894
1752	0	3768	14546			4.50088e+06	4.50088e+06	0.696431	1.43589
1753	0	3848	14546			4.17494e+06	4.17494e+06	0.820388	1.21894
1754	0	3928	14546			4.02392e+06	4.02392e+06	0.873326	1.14505
1755	0	4008	14546			3.51892e+06	3.51892e+06	0.94776	1.05512
1756	0	4088	14546			3.40868e+06	3.40868e+06	1.00192	0.99808
1757	0	4168	14546			4.54315e+06	4.54315e+06	1.03073	0.97019
1758	0	4248	14546			2864303	2864303	1.15502	0.865789
1759	0	4328	14546			2279471	2279471	1.0494	0.952924
1760	0	4408	14546			2.44624e+06	2.44624e+06	1.14078	0.876596
1761	0	4488	14546			2.24895e+06	2.24895e+06	0.934354	1.07026
1762	0	4568	14546			2311689	2311689	1.00034	0.999665
1763	0	4648	14546			1.86149e+06	1.86149e+06	1.11357	0.898013
1764	0	4728	14546			2.1285e+06	2.1285e+06	1.14916	0.870198
1765	0	4808	14546			1.77702e+06	1.77702e+06	1.07101	0.933698
1766	0	4888	14546			1.85869e+06	1.85869e+06	1.07128	0.933463
1767	0	4968	14546			1.58766e+06	1.58766e+06	1.14308	0.874832
1768	0	5048	14546			1767159	1767159	1.02192	0.978551
1769	0	5128	14546			2.35745e+06	2.35745e+06	1.14358	0.874444
1770	0	5208	14546			1.95571e+06	1.95571e+06	0.996481	1.00353
1771	0	5288	14546			2.49835e+06	2.49835e+06	1.12675	0.887512
1772	0	5368	14546			3087764	3087764	1.05906	0.944234
1773	0	5448	14546			4.30547e+06	4.30547e+06	0.968851	1.03215
1774	0	5528	14546			6.28862e+06	6.28862e+06	1.03933	0.96216
1775	0	5608	14546			6933386	6933386	0.892788	1.12009
1776	0	5688	14546			7.93197e+06	7.93197e+06	0.867831	1.1523
1777	0	5768	14546			7.23376e+06	7.23376e+06	0.876036	1.14151
1778	0	5848	14546			9481551	9481551	1.08173	0.924449
1779	0	5928	14546			6968402	6968402	0.77872	1.28416
1780	0	6008	14546			8.23413e+06	8.23413e+06	0.735983	1.35873
1781	0	6088	14546			8180386	8180386	0.915509	1.09229
1782	0	6168	14546			6.12681e+06	6.12681e+06	0.721322	1.38634
1783	0	6248	14546			3.36289e+06	3.36289e+06	0.758652	1.31813
1784	0	6328	14546			3.49653e+06	3.49653e+06	0.91018	1.09868
1785	0	6408	14546			3.0223e+06	3.0223e+06	1.01299	0.987177
1786	0	6488	14546			5007140	5007140	0.985187	1.01504
1787	0	6568	14546			4.53091e+06	4.53091e+06	1.14807	0.871026
1788	0	6648	14546			5.27533e+06	5.27533e+06	0.97953	1.0209
1789	0	6728	14546			4911953	4911953	0.936246	1.0681
1790	0	6808	14546			6344033	6344033	0.987174	1.01299
1791	0	6888	14546			4420195	4420195	0.740288	1.35083
1792	0	6968	14546			3535999	3535999	1.09181	0.915909
1793	0	7048	14546			6.90588e+06	6.90588e+06	0.973801	1.0269
1794	0	7128	14546			6857526	6857526	0.954708	1.04744
1795	0	7208	14546			5206986	5206986	1.13959	0.877508
1796	0	7288	14546			8.10226e+06	8.10226e+06	1.1399	0.877272
1797	0	7368	14546			6247285	6247285	1.38918	0.719851
1798	0	7448	14546			6182683	6182683	1.06459	0.939328
1799	0	7528	14546			7.71147e+06	7.71147e+06	1.03395	0.967166
1800	0	7608	14546			8900704	8900704	1.07565	0.929668
1801	0	7688	14546			6.53206e+06	6.53206e+06	1.46616	0.682052
1802	0	7768	14546			5.21526e+06	5.21526e+06	1.39142	0.718692
1803	0	7848	14546			4.81979e+06	4.81979e+06	1.38245	0.723353
1804	0	7928	14546			4304361	4304361	1.39084	0.718989
1805	0	8008	14546			4.63877e+06	4.63877e+06	1.26937	0.78779
1806	0	8088	14546			4675959	4675959	1.57122	0.636446
1807	0	8168	14546			4518064	4518064	1.70691	0.585855
1808	0	8248	14546			3137933	3137933	2.15544	0.463943
1809	0	8328	14546			2728707	2728707	1.76754	0.565758
1810	0	8408	14546			2.39683e+06	2.39683e+06	1.97968	0.505131
1811	0	8488	14546			2507359	2507359	2.03193	0.492143
1812	0	8568	14546			2.70495e+06	2.70495e+06	1.98135	0.504707
1813	0	8648	14546			2.93962e+06	2.93962e+06	1.9808	0.504847
1814	0	8728	14546			1.92596e+06	1.92596e+06	2.22442	0.449555
1815	0	8808	14546			1.70837e+06	1.70837e+06	2.41133	0.414709
1816	0	8888	14546			1401127	1401127	1.74899	0.571758
1817	0	8968	14546			1.14181e+06	1.14181e+06	1.54157	0.64869
1818	0	9048	14546			749933	749933	1.36034	0.735108
1819	0	9128	14546			428406	428406	1.53672	0.650738
1820	0	9208	14546			72170.1	72170.1	1.18822	0.841596
1821	0	648	14466			0	1832.88	0.817869	1.22269
1822	0	728	14466			0	1832.88	1.01501	0.98521
1823	0	808	14466			261358	261358	1.02156	0.97889
1824	0	888	14466			821840	821840	1.29819	0.770306
1825	0	968	14466			479320	479320	1.07122	0.933517
1826	0	1048	14466			610365	610365	1.14872	0.870531
1827	0	1128	14466			881930	881930	1.11444	0.897314
1828	0	1208	14466			1.8061e+06	1.8061e+06	1.2348	0.809846
1829	0	1288	14466			2.15038e+06	2.15038e+06	1.09298	0.914931
1830	0	1368	14466			3.45053e+06	3.45053e+06	1.32234	0.756233
1831	0	1448	14466			3.0476e+06	3.0476e+06	1.09328	0.914678
1832	0	1528	14466			2.53243e+06	2.53243e+06	1.20551	0.829524
1833	0	1608	14466			3878891	3878891	1.10806	0.902482
1834	0	1688	14466			4.40556e+06	4.40556e+06	1.32353	0.755557
1835	0	1768	14466			8071023	8071023	0.993405	1.00664
1836	0	1848	14466			10100286	10100286	1.0335	0.967589
1837	0	1928	14466			9070069	9070069	0.79796	1.2532
1838	0	2008	14466			7676376	7676376	0.802316	1.24639
1839	0	2088	14466			7976980	7976980	0.752735	1.32849
1840	0	2168	14466			7.3837e+06	7.3837e+06	0.582216	1.71757
1841	0	2248	14466			6328592	6328592	0.543993	1.83826
1842	0	2328	14466			3.12366e+06	3.12366e+06	0.509416	1.96303
1843	0	2408	14466			2.44203e+06	2.44203e+06	0.409895	2.43965
1844	0	2488	14466			2.40602e+06	2.40602e+06	0.32978	3.03232
1845	0	2568	14466			2.6593e+06	2.6593e+06	0.315413	3.17045
1846	0	2648	14466			2261084	2261084	0.325278	3.07429
1847	0	2728	14466			4.83966e+06	4.83966e+06	0.410866	2.43389
1848	0	2808	14466			6.26885e+06	6.26885e+06	0.491753	2.03354
1849	0	2888	14466			5.47218e+06	5.47218e+06	0.477031	2.0963
1850	0	2968	14466			6.40641e+06	6.40641e+06	0.599105	1.66916
1851	0	3048	14466			5706479	5706479	0.67093	1.49047
1852	0	3128	14466			6541501	6541501	0.549912	1.81847
1853	0	3208	14466			7.63844e+06	7.63844e+06	0.546869	1.82859
1854	0	3288	14466			8.12761e+06	8.12761e+06	0.640338	1.56167
1855	0	3368	14466			9109413	9109413	0.639403	1.56396
1856	0	3448	14466			5604793	5604793	0.768386	1.30143
1857	0	3528	14466			4888206	4888206	0.720791	1.38736
1858	0	3608	14466			3.37506e+06	3.37506e+06	0.670607	1.49119
1859	0	3688	14466			4322369	4322369	0.799242	1.25119
1860	0	3768	14466			3.96366e+06	3.96366e+06	0.841702	1.18807
1861	0	3848	14466			2.69973e+06	2.69973e+06	0.910486	1.09831
1862	0	3928	14466			2.90248e+06	2.90248e+06	0.820344	1.219
1863	0	4008	14466			3.26436e+06	3.26436e+06	1.02198	0.978493
1864	0	4088	14466			3.91771e+06	3.91771e+06	0.937675	1.06647
1865	0	4168	14466			3.93575e+06	3.93575e+06	1.11242	0.898944
1866	0	4248	14466			3.1045e+06	3.1045e+06	0.945399	1.05775
1867	0	4328	14466			2831967	2831967	0.963464	1.03792
1868	0	4408	14466			2141540	2141540	1.15407	0.866502
1869	0	4488	14466			1.84482e+06	1.84482e+06	1.02129	0.97915
1870	0	4568	14466			1937146	1937146	1.11251	0.898865
1871	0	4648	14466			2.04431e+06	2.04431e+06	1.17443	0.851477
1872	0	4728	14466			2327430	2327430	1.17731	0.849396
1873	0	4808	14466			1.46012e+06	1.46012e+06	1.18599	0.843175
1874	0	4888	14466			1.88802e+06	1.88802e+06	1.24479	0.803349
1875	0	4968	14466			1.60101e+06	1.60101e+06	1.08423	0.922311
1876	0	5048	14466			2.1482e+06	2.1482e+06	1.08377	0.922709
1877	0	5128	14466			2.527e+06	2.527e+06	1.05024	0.952164
1878	0	5208	14466			2.3054e+06	2.3054e+06	0.993202	1.00684
1879	0	5288	14466			2383134	2383134	1.04118	0.960449
1880	0	5368	14466			2.37664e+06	2.37664e+06	1.09061	0.916919
1881	0	5448	14466			2.79805e+06	2.79805e+06	1.03588	0.96536
1882	0	5528	14466			2875340	2875340	1.01815	0.982172
1883	0	5608	14466			3.82205e+06	3.82205e+06	0.974955	1.02569
1884	0	5688	14466			7928453	7928453	0.822332	1.21605
1885	0	5768	14466			8007898	8007898	0.68731	1.45495
1886	0	5848	14466			6044354	6044354	0.741302	1.34898
1887	0	5928	14466			9047395	9047395	0.841715	1.18805
1888	0	6008	14466			8593983	8593983	0.862044	1.16003
1889	0	6088	14466			7.7993e+06	7.7993e+06	0.861385	1.16092
1890	0	6168	14466			7713673	7713673	0.730795	1.36837
1891	0	6248	14466			6.78391e+06	6.78391e+06	0.737175	1.35653
1892	0	6328	14466			6.05216e+06	6.05216e+06	0.778709	1.28418
1893	0	6408	14466			3.5929e+06	3.5929e+06	0.96952	1.03144
1894	0	6488	14466			3854283	3854283	1.05468	0.948154
1895	0	6568	14466			4.51551e+06	4.51551e+06	0.972909	1.02785
1896	0	6648	14466			4912434	4912434	0.753744	1.32671
1897	0	6728	14466			3.90508e+06	3.90508e+06	0.877092	1.14013
1898	0	6808	14466			8237108	8237108	0.90586	1.10392
1899	0	6888	14466			9397757	9397757	0.880166	1.13615
1900	0	6968	14466			4276137	4276137	1.01235	0.987805
1901	0	7048	14466			5495215	5495215	0.964887	1.03639
1902	0	7128	14466			6811502	6811502	0.901573	1.10917
1903	0	7208	14466			6.78765e+06	6.78765e+06	0.844874	1.18361
1904	0	7288	14466			3007867	3007867	0.740966	1.34959
1905	0	7368	14466			5655769	5655769	1.09309	0.914836
1906	0	7448	14466			9902071	9902071	1.22136	0.818762
1907	0	7528	14466			7.84833e+06	7.84833e+06	1.41263	0.7079
1908	0	7608	14466			7.47116e+06	7.47116e+06	1.02981	0.971057
1909	0	7688	14466			6.18855e+06	6.18855e+06	1.57597	0.634529
1910	0	7768	14466			6.58475e+06	6.58475e+06	1.38677	0.721101
1911	0	7848	14466			5569675	5569675	1.41905	0.704697
1912	0	7928	14466			4125380	4125380	1.64247	0.608837
1913	0	8008	14466			3.37595e+06	3.37595e+06	1.70253	0.587362
1914	0	8088	14466			3.58221e+06	3.58221e+06	1.28003	0.781234
1915	0	8168	14466			4.41548e+06	4.41548e+06	1.82864	0.546854
1916	0	8248	14466			3.36434e+06	3.36434e+06	1.688	0.592416
1917	0	8328	14466			4.07119e+06	4.07119e+06	1.73674	0.575792
1918	0	8408	14466			3.32803e+06	3.32803e+06	2.01201	0.497015
1919	0	8488	14466			2.23829e+06	2.23829e+06	1.8402	0.543418
1920	0	8568	14466			1926033	1926033	1.77129	0.564561
1921	0	8648	14466			2601988	2601988	1.59568	0.62669
1922	0	8728	14466			1.85501e+06	1.85501e+06	1.60119	0.624537
1923	0	8808	14466			2.37286e+06	2.37286e+06	1.81675	0.550432
1924	0	8888	14466			1.61619e+06	1.61619e+06	1.78951	0.558813
1925	0	8968	14466			1.24713e+06	1.24713e+06	1.54899	0.645583
1926	0	9048	14466			807937	807937	1.81963	0.549562
1927	0	9128	14466			488416	488416	1.46564	0.682298
1928	0	9208	14466			625148	625148	1.24884	0.800743
1929	0	568	14386			0	1832.88	180.558	0.00553839
1930	0	648	14386			0	1832.88	1.51992	0.657931
1931	0	728	14386			0	1832.88	1.242	0.805152
1932	0	808	14386			376373	376373	1.12898	0.885752
1933	0	888	14386			604653	604653	1.4396	0.694637
1934	0	968	14386			385218	385218	1.0662	0.937913
1935	0	1048	14386			331597	331597	0.841279	1.18867
1936	0	1128	14386			549597	549597	0.764212	1.30854
1937	0	1208	14386			1.35095e+06	1.35095e+06	0.779416	1.28301
1938	0	1288	14386			2.38378e+06	2.38378e+06	1.2046	0.830154
1939	0	1368	14386			2.63168e+06	2.63168e+06	1.32325	0.755716
1940	0	1448	14386			3.78398e+06	3.78398e+06	1.27512	0.784237
1941	0	1528	14386			1.36311e+06	1.36311e+06	0.942283	1.06125
1942	0	1608	14386			7.2611e+06	7.2611e+06	1.30881	0.764053
1943	0	1688	14386			7519961	7519961	1.0145	0.985709
1944	0	1768	14386			6759209	6759209	0.812718	1.23044
1945	0	1848	14386			9749028	9749028	1.38505	0.721997
1946	0	1928	14386			10226151	10226151	0.854185	1.17071
1947	0	2008	14386			6.95781e+06	6.95781e+06	1.08926	0.918051
1948	0	2088	14386			8011839	8011839	0.882183	1.13355
1949	0	2168	14386			6.69512e+06	6.69512e+06	0.600859	1.66428
1950	0	2248	14386			3.47492e+06	3.47492e+06	0.393922	2.53857
1951	0	2328	14386			2.80292e+06	2.80292e+06	0.508777	1.9655
1952	0	2408	14386			1.43313e+06	1.43313e+06	0.236194	4.23381
1953	0	2488	14386			1.40783e+06	1.40783e+06	0.343249	2.91333
1954	0	2568	14386			1.7442e+06	1.7442e+06	0.367326	2.72238
1955	0	2648	14386			5696437	5696437	0.476435	2.09892
1956	0	2728	14386			7567746	7567746	0.520939	1.91961
1957	0	2808	14386			7.9606e+06	7.9606e+06	0.485289	2.06063
1958	0	2888	14386			7388471	7388471	0.490891	2.03711
1959	0	2968	14386			6694357	6694357	0.552482	1.81001
1960	0	3048	14386			6.52817e+06	6.52817e+06	0.646875	1.54589
1961	0	3128	14386			9259432	9259432	0.768457	1.30131
1962	0	3208	14386			7.33526e+06	7.33526e+06	0.57019	1.7538
1963	0	3288	14386			5.64236e+06	5.64236e+06	0.757907	1.31942
1964	0	3368	14386			5.23483e+06	5.23483e+06	0.755544	1.32355
1965	0	3448	14386			4241366	4241366	0.717344	1.39403
1966	0	3528	14386			3.72394e+06	3.72394e+06	0.708436	1.41156
1967	0	3608	14386			3.18502e+06	3.18502e+06	0.764253	1.30847
1968	0	3688	14386			3.92218e+06	3.92218e+06	0.809212	1.23577
1969	0	3768	14386			3.42493e+06	3.42493e+06	0.89845	1.11303
1970	0	3848	14386			3.22647e+06	3.22647e+06	0.862274	1.15972
1971	0	3928	14386			2.6621e+06	2.6621e+06	0.945253	1.05792
1972	0	4008	14386			2.58327e+06	2.58327e+06	0.969848	1.03109
1973	0	4088	14386			2.55914e+06	2.55914e+06	1.1613	0.861105
1974	0	4168	14386			2.52711e+06	2.52711e+06	1.10465	0.905265
1975	0	4248	14386			3.03515e+06	3.03515e+06	1.20161	0.83222
1976	0	4328	14386			2.43268e+06	2.43268e+06	1.11617	0.895924
1977	0	4408	14386			2.00113e+06	2.00113e+06	1.08338	0.923036
1978	0	4488	14386			1.87698e+06	1.87698e+06	0.913888	1.09423
1979	0	4568	14386			2.21855e+06	2.21855e+06	1.08165	0.924514
1980	0	4648	14386			2.24245e+06	2.24245e+06	1.09284	0.915051
1981	0	4728	14386			2.13672e+06	2.13672e+06	1.03253	0.968498
1982	0	4808	14386			2.39094e+06	2.39094e+06	1.10832	0.902263
1983	0	4888	14386			2.49918e+06	2.49918e+06	1.14261	0.875187
1984	0	4968	14386			2.39888e+06	2.39888e+06	1.06397	0.93988
1985	0	5048	14386			2.17274e+06	2.17274e+06	0.986707	1.01347
1986	0	5128	14386			4.16647e+06	4.16647e+06	0.987195	1.01297
1987	0	5208	14386			2.44856e+06	2.44856e+06	1.21522	0.822896
1988	0	5288	14386			2.15702e+06	2.15702e+06	1.05264	0.94999
1989	0	5368	14386			2.36805e+06	2.36805e+06	1.12231	0.891023
1990	0	5448	14386			2.75149e+06	2.75149e+06	0.968405	1.03263
1991	0	5528	14386			2.63639e+06	2.63639e+06	1.09927	0.909693
1992	0	5608	14386			3640946	3640946	0.948878	1.05388
1993	0	5688	14386			4.23155e+06	4.23155e+06	1.09183	0.915894
1994	0	5768	14386			5273131	5273131	0.812347	1.231
1995	0	5848	14386			5.39446e+06	5.39446e+06	0.975136	1.0255
1996	0	5928	14386			6520214	6520214	0.752271	1.32931
1997	0	6008	14386			7912736	7912736	0.712381	1.40374
1998	0	6088	14386			8.02969e+06	8.02969e+06	0.739056	1.35308
[truncated: 50,088 more rows]
