# Supplementary material for: Untargeted pixel-by-pixel metabolite ratio imaging as a novel tool for biomedical discovery in mass spectrometry imaging
Source: eLife. 2025 Mar 18;13:RP96892. doi: 10.7554/eLife.96892 (PMC11919253; doi:10.7554/eLife.96892)
Supplement: Figure 1—figure supplement 3—source data 1. [file elife-96892-fig1-figsupp3-data1.xlsx]

## Sheet: concentration vs abundance
spotId	raster	x	y	z	Date	Abundance Data	Lactate_Abundance	Glucose_Cl_Abundance	Ascorbate_Abundance	Concentration Data	Lactate_Concentration	Glucose_Cl_Concentration	Ascorbate_Concentration
37820	10	41638.8	17902	0			89554.5	59762	58255.9		2.55812	0.127174	0.132533
37821	10	41718.8	17902	0			6699.33	7210.79	6008.07		0.646587	0.120605	0.0802851
37822	10	41798.8	17902	0			169778	169961	228982		4.40892	0.140949	0.303259
37823	10	41878.8	17902	0			129998	138469	74027.8		3.49116	0.137013	0.148305
37824	10	41958.8	17902	0			6699.33	7210.79	6008.07		0.646587	0.120605	0.0802851
37825	10	42038.8	17902	0			102280	75576.5	145845		2.8517	0.129151	0.220122
37826	10	42118.8	17902	0			6699.33	7210.79	6008.07		0.646587	0.120605	0.0802851
37827	10	41558.8	17822	0			84565.9	3.12136e+06	1.4345e+06		2.44302	0.509874	1.50878
37828	10	41638.8	17822	0			118895	6096969	3.95558e+06		3.23501	0.881825	4.02985
37829	10	41718.8	17822	0			52414.1	1834653	1667256		1.70126	0.349036	1.74153
37830	10	41798.8	17822	0			154877	3.68688e+06	2.95822e+06		4.06515	0.580565	3.03249
37831	10	41878.8	17822	0			156064	4257809	2.81998e+06		4.09254	0.65193	2.89426
37832	10	41958.8	17822	0			128544	4.01146e+06	3.02806e+06		3.45764	0.621137	3.10233
37833	10	42038.8	17822	0			140251	1.83032e+06	915562		3.72771	0.348494	0.989839
37834	10	42118.8	17822	0			130358	719071	287522		3.49947	0.209588	0.361799
37835	10	42198.8	17822	0			118358	314221	73277.8		3.22263	0.158982	0.147555
37836	10	42278.8	17822	0			77174.9	153685	63465.8		2.27251	0.138915	0.137743
37837	10	42358.8	17822	0			78108.8	147189	47344.1		2.29406	0.138103	0.121621
37838	10	42438.8	17822	0			74366	342506	78209.7		2.20771	0.162517	0.152487
37839	10	42518.8	17822	0			65766.7	361127	6008.07		2.00931	0.164845	0.0802851
37840	10	41478.8	17742	0			189324	8394077	5574808		4.85987	1.16896	5.64909
37841	10	41558.8	17742	0			207352	15151423	12520538		5.27579	2.01363	12.5948
37842	10	41638.8	17742	0			112737	15694750	14972311		3.09295	2.08155	15.0466
37843	10	41718.8	17742	0			150278	16329567	13931181		3.95905	2.1609	14.0055
37844	10	41798.8	17742	0			144664	10292331	10187147		3.82953	1.40625	10.2614
37845	10	41878.8	17742	0			247783	12677936	10003180		6.20855	1.70445	10.0775
37846	10	41958.8	17742	0			235235	11925271	9786047		5.91907	1.61036	9.86032
37847	10	42038.8	17742	0			127495	12414756	13381852		3.43344	1.67155	13.4561
37848	10	42118.8	17742	0			146738	9545779	8677877		3.87738	1.31293	8.75215
37849	10	42198.8	17742	0			197334	8543480	7910732		5.04468	1.18764	7.98501
37850	10	42278.8	17742	0			242528	8069298	7.9509e+06		6.08733	1.12837	8.02517
37851	10	42358.8	17742	0			231293	9958818	8.28576e+06		5.82812	1.36456	8.36004
37852	10	42438.8	17742	0			222726	8654039	6799167		5.63047	1.20146	6.87344
37853	10	42518.8	17742	0			191941	5.06253e+06	4445435		4.92024	0.75252	4.51971
37854	10	42598.8	17742	0			148322	2.28348e+06	590971		3.91392	0.405139	0.665248
37855	10	42678.8	17742	0			83588.3	1.36268e+06	200779		2.42047	0.290039	0.275056
37856	10	42758.8	17742	0			124240	1.39059e+06	103925		3.35835	0.293527	0.178202
37857	10	42838.8	17742	0			219511	1.32194e+06	182807		5.55631	0.284947	0.257084
37858	10	41318.8	17662	0			6699.33	481651	6008.07		0.646587	0.17991	0.0802851
37859	10	41398.8	17662	0			47142	6915112	5313718		1.57963	0.984093	5.388
37860	10	41478.8	17662	0			130005	12438117	8.11171e+06		3.49134	1.67447	8.18599
37861	10	41558.8	17662	0			219399	16896886	11858336		5.55372	2.23181	11.9326
37862	10	41638.8	17662	0			74332	16841940	15770401		2.20692	2.22495	15.8447
37863	10	41718.8	17662	0			66950.9	18178086	14607423		2.03663	2.39196	14.6817
37864	10	41798.8	17662	0			159368	16205810	12168256		4.16877	2.14543	12.2425
37865	10	41878.8	17662	0			165869	16383802	12961846		4.31875	2.16768	13.0361
37866	10	41958.8	17662	0			102351	16907342	14672078		2.85333	2.23312	14.7464
37867	10	42038.8	17662	0			47881.5	15453495	14636096		1.59669	2.05139	14.7104
37868	10	42118.8	17662	0			84075.5	14788764	14430748		2.43171	1.9683	14.505
37869	10	42198.8	17662	0			150969	14832699	11822491		3.97499	1.97379	11.8968
37870	10	42278.8	17662	0			103233	12239661	11712449		2.87369	1.64966	11.7867
37871	10	42358.8	17662	0			149528	12971935	14152948		3.94174	1.7412	14.2272
37872	10	42438.8	17662	0			162883	15542027	13232086		4.24986	2.06246	13.3064
37873	10	42518.8	17662	0			125358	10199253	10329116		3.38412	1.39461	10.4034
37874	10	42598.8	17662	0			122352	12580642	12785091		3.31477	1.69228	12.8594
37875	10	42678.8	17662	0			163550	10494868	10813504		4.26525	1.43156	10.8878
37876	10	42758.8	17662	0			132190	7.70471e+06	7578066		3.54175	1.08279	7.65234
37877	10	42838.8	17662	0			125821	2620801	598740		3.3948	0.447304	0.673017
37878	10	42918.8	17662	0			98451.2	2.65297e+06	954947		2.76337	0.451325	1.02922
37879	10	42998.8	17662	0			311324	3.87696e+06	844352		7.67449	0.604324	0.918629
37880	10	43078.8	17662	0			376991	3.33238e+06	512982		9.18948	0.536251	0.587259
37881	10	41238.8	17582	0			92292	285611	83808.7		2.62127	0.155405	0.158086
37882	10	41318.8	17582	0			6699.33	4833848	3.63163e+06		0.646587	0.723935	3.70591
37883	10	41398.8	17582	0			63540.5	12766930	9052702		1.95795	1.71557	9.12698
37884	10	41478.8	17582	0			125713	16290419	11398330		3.39232	2.15601	11.4726
37885	10	41558.8	17582	0			133047	14785673	10866762		3.56151	1.96791	10.941
37886	10	41638.8	17582	0			86735.6	16812390	12747100		2.49308	2.22125	12.8214
37887	10	41718.8	17582	0			127249	21348096	13208117		3.42776	2.78822	13.2824
37888	10	41798.8	17582	0			67131.1	17520568	13790520		2.04079	2.30978	13.8648
37889	10	41878.8	17582	0			106935	19351566	13782899		2.9591	2.53865	13.8572
37890	10	41958.8	17582	0			88044.3	16018136	12322938		2.52327	2.12197	12.3972
37891	10	42038.8	17582	0			171878	17427142	13801805		4.45738	2.2981	13.8761
37892	10	42118.8	17582	0			97952.4	17005550	14359953		2.75186	2.2454	14.4342
37893	10	42198.8	17582	0			54302	14766695	15598965		1.74482	1.96554	15.6732
37894	10	42278.8	17582	0			61104.7	16426454	14262366		1.90176	2.17301	14.3366
37895	10	42358.8	17582	0			47704.5	16517328	15857192		1.59261	2.18437	15.9315
37896	10	42438.8	17582	0			6699.33	15798246	14535986		0.646587	2.09448	14.6103
37897	10	42518.8	17582	0			59750.9	16167340	12323564		1.87052	2.14062	12.3978
37898	10	42598.8	17582	0			6699.33	17300566	15816326		0.646587	2.28227	15.8906
37899	10	42678.8	17582	0			6699.33	13915395	14708650		0.646587	1.85913	14.7829
37900	10	42758.8	17582	0			6699.33	15460915	15287401		0.646587	2.05232	15.3617
37901	10	42838.8	17582	0			137009	16634849	12926688		3.65291	2.19906	13.001
37902	10	42918.8	17582	0			186504	10925322	9345961		4.79482	1.48537	9.42024
37903	10	42998.8	17582	0			232860	6919890	3.03161e+06		5.86427	0.98469	3.10589
37904	10	43078.8	17582	0			63701.9	5.37834e+06	1.75576e+06		1.96168	0.791996	1.83003
37905	10	43158.8	17582	0			194184	7.95536e+06	2.68389e+06		4.972	1.11412	2.75816
37906	10	43238.8	17582	0			181219	8749511	3951410		4.67288	1.21339	4.02569
37907	10	41158.8	17502	0			70667	733603	6008.07		2.12237	0.211404	0.0802851
37908	10	41238.8	17502	0			6699.33	3.11807e+06	1.47458e+06		0.646587	0.509463	1.54885
37909	10	41318.8	17502	0			80559.9	9327252	7.46617e+06		2.3506	1.28561	7.54045
37910	10	41398.8	17502	0			108853	13021553	9347348		3.00334	1.7474	9.42163
37911	10	41478.8	17502	0			112204	16139210	10609638		3.08066	2.13711	10.6839
37912	10	41558.8	17502	0			51261.1	14996930	13072372		1.67466	1.99432	13.1466
37913	10	41638.8	17502	0			119813	13911681	9475004		3.25621	1.85866	9.54928
37914	10	41718.8	17502	0			97235.4	14112285	10541908		2.73532	1.88374	10.6162
37915	10	41798.8	17502	0			75270	14257818	11433100		2.22856	1.90193	11.5074
37916	10	41878.8	17502	0			71247	15585961	11374430		2.13575	2.06795	11.4487
37917	10	41958.8	17502	0			95069.3	17585560	12791165		2.68535	2.3179	12.8654
37918	10	42038.8	17502	0			68725.1	16297406	14419424		2.07757	2.15688	14.4937
37919	10	42118.8	17502	0			77388.1	14352499	10779809		2.27743	1.91377	10.8541
37920	10	42198.8	17502	0			62315.5	16833614	12254111		1.92969	2.22391	12.3284
37921	10	42278.8	17502	0			74322.5	17413672	15284797		2.2067	2.29641	15.3591
37922	10	42358.8	17502	0			84988.3	17996654	13926684		2.45277	2.36929	14.001
37923	10	42438.8	17502	0			115587	17216580	12643867		3.15871	2.27178	12.7181
37924	10	42518.8	17502	0			82985.4	15305427	11740978		2.40656	2.03288	11.8153
37925	10	42598.8	17502	0			122322	17051358	12698180		3.31408	2.25112	12.7725
37926	10	42678.8	17502	0			6699.33	14087172	15918669		0.646587	1.8806	15.9929
37927	10	42758.8	17502	0			6699.33	15923176	9754653		0.646587	2.1101	9.82893
37928	10	42838.8	17502	0			48859.3	17923288	11756479		1.61925	2.36011	11.8308
37929	10	42918.8	17502	0			74623.5	16129994	13676446		2.21365	2.13595	13.7507
37930	10	42998.8	17502	0			6699.33	14653540	13171095		0.646587	1.9514	13.2454
37931	10	43078.8	17502	0			116805	11089158	7.7924e+06		3.1868	1.50585	7.86668
37932	10	43158.8	17502	0			114599	7570661	3391019		3.13591	1.06604	3.4653
37933	10	43238.8	17502	0			96109.2	9739706	3.97014e+06		2.70934	1.33717	4.04441
37934	10	43318.8	17502	0			200138	11193410	4.81857e+06		5.10935	1.51888	4.89284
37935	10	43398.8	17502	0			169607	10274674	3.91633e+06		4.40498	1.40404	3.9906
37936	10	43478.8	17502	0			195760	11467816	4631690		5.00836	1.55318	4.70597
37937	10	41078.8	17422	0			6699.33	597964	84614.8		0.646587	0.19445	0.158892
37938	10	41158.8	17422	0			6699.33	4.14936e+06	2777593		0.646587	0.638374	2.85187
37939	10	41238.8	17422	0			65685	7269354	5117261		2.00743	1.02837	5.19154
37940	10	41318.8	17422	0			75211.6	10501524	8211661		2.22721	1.43239	8.28594
37941	10	41398.8	17422	0			48951.2	13122656	10087950		1.62137	1.76004	10.1622
37942	10	41478.8	17422	0			158115	18890700	11572243		4.13986	2.48104	11.6465
37943	10	41558.8	17422	0			60450.4	15400215	11560589		1.88666	2.04473	11.6349
37944	10	41638.8	17422	0			80273.2	16628940	12616845		2.34399	2.19832	12.6911
37945	10	41718.8	17422	0			82580	15749697	12595196		2.39721	2.08842	12.6695
37946	10	41798.8	17422	0			6699.33	14626992	13250575		0.646587	1.94808	13.3249
37947	10	41878.8	17422	0			113278	17066880	12704362		3.10544	2.25306	12.7786
37948	10	41958.8	17422	0			65079	16220053	13100476		1.99345	2.14721	13.1748
37949	10	42038.8	17422	0			51944	15129675	13288948		1.69041	2.01091	13.3632
37950	10	42118.8	17422	0			6699.33	15522014	7178635		0.646587	2.05996	7.25291
37951	10	42198.8	17422	0			6699.33	15220825	7349493		0.646587	2.02231	7.42377
37952	10	42278.8	17422	0			81006.5	15632268	11103403		2.36091	2.07374	11.1777
37953	10	42358.8	17422	0			69999.5	16046525	6.24779e+06		2.10697	2.12552	6.32206
37954	10	42438.8	17422	0			6699.33	14207411	13543409		0.646587	1.89563	13.6177
37955	10	42518.8	17422	0			82034.4	15576325	5.80032e+06		2.38462	2.06674	5.87459
37956	10	42598.8	17422	0			6699.33	15091305	10535346		0.646587	2.00612	10.6096
37957	10	42678.8	17422	0			6699.33	15189388	9343652		0.646587	2.01838	9.41793
37958	10	42758.8	17422	0			6699.33	15773808	9278471		0.646587	2.09143	9.35275
37959	10	42838.8	17422	0			6699.33	18012400	5.62411e+06		0.646587	2.37125	5.69839
37960	10	42918.8	17422	0			6699.33	15303564	11165880		0.646587	2.03265	11.2402
37961	10	42998.8	17422	0			6699.33	16232758	8659917		0.646587	2.1488	8.73419
37962	10	43078.8	17422	0			6699.33	19170750	12239413		0.646587	2.51605	12.3137
37963	10	43158.8	17422	0			74209.9	14032334	8012698		2.2041	1.87375	8.08698
37964	10	43238.8	17422	0			73601.1	13341586	15324612		2.19006	1.7874	15.3989
37965	10	43318.8	17422	0			198495	9194140	5.22534e+06		5.07144	1.26897	5.29961
37966	10	43398.8	17422	0			93444.5	10378243	5129361		2.64786	1.41698	5.20364
37967	10	43478.8	17422	0			102358	11096495	5590457		2.85351	1.50677	5.66473
37968	10	43558.8	17422	0			222084	11636897	5.17436e+06		5.61567	1.57432	5.24864
37969	10	43638.8	17422	0			164808	13644997	6012333		4.29426	1.82533	6.08661
37970	10	40998.8	17342	0			69343	825765	79698.8		2.09182	0.222925	0.153976
37971	10	41078.8	17342	0			6699.33	3202938	2.10282e+06		0.646587	0.520071	2.1771
37972	10	41158.8	17342	0			118828	8043902	5.86848e+06		3.23348	1.12519	5.94275
37973	10	41238.8	17342	0			122037	10837744	6748164		3.3075	1.47442	6.82244
37974	10	41318.8	17342	0			153397	12787945	9199584		4.03101	1.7182	9.27386
37975	10	41398.8	17342	0			120373	14845577	11733133		3.26912	1.9754	11.8074
37976	10	41478.8	17342	0			91114.9	16509423	11776721		2.59411	2.18338	11.851
37977	10	41558.8	17342	0			117755	16780192	13085193		3.20873	2.21723	13.1595
37978	10	41638.8	17342	0			59546.6	16418243	14304175		1.86581	2.17198	14.3785
37979	10	41718.8	17342	0			79937.1	15704617	10658913		2.33623	2.08278	10.7332
37980	10	41798.8	17342	0			78340.9	15556542	10542215		2.29941	2.06427	10.6165
37981	10	41878.8	17342	0			6699.33	17137792	16327393		0.646587	2.26193	16.4017
37982	10	41958.8	17342	0			58771.6	15708875	13236539		1.84793	2.08331	13.3108
37983	10	42038.8	17342	0			6699.33	16424951	11526265		0.646587	2.17282	11.6005
37984	10	42118.8	17342	0			6699.33	14708114	8513482		0.646587	1.95822	8.58776
37985	10	42198.8	17342	0			6699.33	14828712	5.33442e+06		0.646587	1.97329	5.4087
37986	10	42278.8	17342	0			6699.33	15620886	9713525		0.646587	2.07231	9.7878
37987	10	42358.8	17342	0			6699.33	13709656	7.94356e+06		0.646587	1.83341	8.01784
37988	10	42438.8	17342	0			81754.7	15748399	12614601		2.37817	2.08825	12.6889
37989	10	42518.8	17342	0			6699.33	15126810	7.79919e+06		0.646587	2.01056	7.87347
37990	10	42598.8	17342	0			6699.33	15619183	5.61048e+06		0.646587	2.0721	5.68476
37991	10	42678.8	17342	0			87858.3	17289000	7130383		2.51898	2.28083	7.20466
37992	10	42758.8	17342	0			6699.33	17310812	9569064		0.646587	2.28356	9.64334
37993	10	42838.8	17342	0			61842.7	14493653	8229463		1.91878	1.93141	8.30374
37994	10	42918.8	17342	0			64908.4	15598969	8007249		1.98951	2.06958	8.08153
37995	10	42998.8	17342	0			6699.33	16685562	6513174		0.646587	2.2054	6.58745
37996	10	43078.8	17342	0			6699.33	17331208	6170611		0.646587	2.28611	6.24489
37997	10	43158.8	17342	0			6699.33	16984346	9687760		0.646587	2.24275	9.76204
37998	10	43238.8	17342	0			6699.33	15219796	12900963		0.646587	2.02218	12.9752
37999	10	43318.8	17342	0			6699.33	16774555	9027505		0.646587	2.21652	9.10178
38000	10	43398.8	17342	0			96420.3	14256129	12214751		2.71651	1.90172	12.289
38001	10	43478.8	17342	0			154364	11704798	7.08999e+06		4.05332	1.5828	7.16426
38002	10	43558.8	17342	0			96578.8	12704348	6323177		2.72017	1.70775	6.39745
38003	10	43638.8	17342	0			141132	14681305	6.29321e+06		3.74804	1.95487	6.36749
38004	10	43718.8	17342	0			146133	17491534	8720162		3.86341	2.30615	8.79444
38005	10	43798.8	17342	0			99774	15696965	9785715		2.79389	2.08182	9.85999
38006	10	40998.8	17262	0			90077.9	1731053	273512		2.57019	0.336086	0.347789
38007	10	41078.8	17262	0			72570	7791786	5645493		2.16627	1.09368	5.71977
38008	10	41158.8	17262	0			73152.8	10789773	8246294		2.17972	1.46843	8.32057
38009	10	41238.8	17262	0			113931	12356907	9497637		3.12049	1.66432	9.57191
38010	10	41318.8	17262	0			116651	14240932	10643859		3.18324	1.89982	10.7181
38011	10	41398.8	17262	0			159110	14462588	10000256		4.16281	1.92753	10.0745
38012	10	41478.8	17262	0			76407.4	14142231	9852230		2.2548	1.88748	9.92651
38013	10	41558.8	17262	0			107324	14912255	10392514		2.96807	1.98374	10.4668
38014	10	41638.8	17262	0			84504.4	15423363	10276218		2.4416	2.04762	10.3505
38015	10	41718.8	17262	0			105888	14575086	11980708		2.93494	1.94159	12.055
38016	10	41798.8	17262	0			62581.5	14980345	14055252		1.93583	1.99225	14.1295
38017	10	41878.8	17262	0			6699.33	15643912	14931056		0.646587	2.07519	15.0053
38018	10	41958.8	17262	0			54915.8	16035908	13896688		1.75898	2.12419	13.971
38019	10	42038.8	17262	0			73909.4	17342212	10976214		2.19717	2.28748	11.0505
38020	10	42118.8	17262	0			6699.33	15881311	10051546		0.646587	2.10487	10.1258
38021	10	42198.8	17262	0			6699.33	14816135	10039316		0.646587	1.97172	10.1136
38022	10	42278.8	17262	0			56187.4	16376371	12599528		1.78831	2.16675	12.6738
38023	10	42358.8	17262	0			6699.33	14995487	13471816		0.646587	1.99414	13.5461
38024	10	42438.8	17262	0			6699.33	15447405	12082287		0.646587	2.05063	12.1566
38025	10	42518.8	17262	0			6699.33	14358173	13727764		0.646587	1.91448	13.802
38026	10	42598.8	17262	0			6699.33	15694207	10898928		0.646587	2.08148	10.9732
38027	10	42678.8	17262	0			6699.33	15962263	11416959		0.646587	2.11499	11.4912
38028	10	42758.8	17262	0			6699.33	19007498	9112275		0.646587	2.49564	9.18655
38029	10	42838.8	17262	0			51046.1	21393464	7892533		1.6697	2.79389	7.96681
38030	10	42918.8	17262	0			6699.33	20492540	8422593		0.646587	2.68127	8.49687
38031	10	42998.8	17262	0			6699.33	17310500	9679838		0.646587	2.28352	9.75412
38032	10	43078.8	17262	0			6699.33	18268770	7.77273e+06		0.646587	2.4033	7.847
38033	10	43158.8	17262	0			6699.33	13801574	8595332		0.646587	1.8449	8.66961
38034	10	43238.8	17262	0			6699.33	14928300	8801886		0.646587	1.98574	8.87616
38035	10	43318.8	17262	0			6699.33	14775216	8514997		0.646587	1.96661	8.58927
38036	10	43398.8	17262	0			6699.33	15202343	11521568		0.646587	2.02	11.5958
38037	10	43478.8	17262	0			6699.33	13930883	14706981		0.646587	1.86106	14.7813
38038	10	43558.8	17262	0			89799	12049607	12069490		2.56376	1.6259	12.1438
38039	10	43638.8	17262	0			70552.4	13225882	6.90621e+06		2.11972	1.77294	6.98049
38040	10	43718.8	17262	0			94634.7	16781446	8.18923e+06		2.67532	2.21738	8.2635
38041	10	43798.8	17262	0			44936.2	18863204	10944427		1.52874	2.4776	11.0187
38042	10	43878.8	17262	0			86975.7	20263666	13079312		2.49862	2.65266	13.1536
38043	10	40998.8	17182	0			6699.33	3959387	1837456		0.646587	0.614627	1.91173
38044	10	41078.8	17182	0			55225.3	9235734	7.07802e+06		1.76612	1.27417	7.1523
38045	10	41158.8	17182	0			92913.5	13420043	12253173		2.63561	1.79721	12.3275
38046	10	41238.8	17182	0			134267	15530837	8857863		3.58967	2.06106	8.93214
38047	10	41318.8	17182	0			108594	13745019	10565844		2.99737	1.83783	10.6401
38048	10	41398.8	17182	0			89965.5	14174097	11355919		2.5676	1.89147	11.4302
38049	10	41478.8	17182	0			110672	17927758	13045458		3.0453	2.36067	13.1197
38050	10	41558.8	17182	0			63012.1	15158083	12970268		1.94576	2.01446	13.0445
38051	10	41638.8	17182	0			54697	15118995	13582232		1.75393	2.00958	13.6565
38052	10	41718.8	17182	0			65927.1	15107555	11385705		2.01301	2.00815	11.46
38053	10	41798.8	17182	0			72922.4	13969609	9923722		2.1744	1.86591	9.998
38054	10	41878.8	17182	0			6699.33	14350368	13482162		0.646587	1.9135	13.5564
38055	10	41958.8	17182	0			45912.8	15349399	13630269		1.55127	2.03838	13.7045
38056	10	42038.8	17182	0			61678.9	15438030	13829805		1.91501	2.04946	13.9041
38057	10	42118.8	17182	0			6699.33	15760466	8.04136e+06		0.646587	2.08976	8.11564
38058	10	42198.8	17182	0			92226.2	18780148	9323043		2.61975	2.46722	9.39732
38059	10	42278.8	17182	0			6699.33	16010896	10747296		0.646587	2.12107	10.8216
38060	10	42358.8	17182	0			6699.33	15642993	7.41869e+06		0.646587	2.07508	7.49296
38061	10	42438.8	17182	0			6699.33	14538639	10307641		0.646587	1.93703	10.3819
38062	10	42518.8	17182	0			6699.33	14844116	12149477		0.646587	1.97522	12.2238
38063	10	42598.8	17182	0			6699.33	14060387	11951724		0.646587	1.87725	12.026
38064	10	42678.8	17182	0			6699.33	14777538	9869202		0.646587	1.9669	9.94348
38065	10	42758.8	17182	0			6699.33	15907186	7.96684e+06		0.646587	2.1081	8.04111
38066	10	42838.8	17182	0			6699.33	18929370	10049671		0.646587	2.48588	10.1239
38067	10	42918.8	17182	0			79265.3	21566672	7.0378e+06		2.32074	2.81554	7.11207
38068	10	42998.8	17182	0			6699.33	19490100	9039617		0.646587	2.55597	9.11389
38069	10	43078.8	17182	0			6699.33	15573259	7039467		0.646587	2.06636	7.11374
38070	10	43158.8	17182	0			6699.33	14658098	8800717		0.646587	1.95197	8.87499
38071	10	43238.8	17182	0			6699.33	18112734	5328238		0.646587	2.3838	5.40252
38072	10	43318.8	17182	0			6699.33	18651224	5.78949e+06		0.646587	2.45111	5.86377
38073	10	43398.8	17182	0			6699.33	18490250	5221504		0.646587	2.43099	5.29578
38074	10	43478.8	17182	0			6699.33	14588083	11627124		0.646587	1.94321	11.7014
38075	10	43558.8	17182	0			6699.33	13060733	13887895		0.646587	1.7523	13.9622
38076	10	43638.8	17182	0			48109.2	13299131	13972021		1.60194	1.7821	14.0463
38077	10	43718.8	17182	0			96185.2	13661746	8.32253e+06		2.71109	1.82742	8.39681
38078	10	43798.8	17182	0			98000.1	17301404	9606261		2.75296	2.28238	9.68054
38079	10	43878.8	17182	0			6699.33	17888334	11057201		0.646587	2.35575	11.1315
38080	10	43958.8	17182	0			106843	21271752	11148944		2.95697	2.77867	11.2232
38081	10	44038.8	17182	0			6699.33	19590636	10262985		0.646587	2.56853	10.3373
38082	10	40998.8	17102	0			48632.2	7.17612e+06	5.28972e+06		1.61401	1.01672	5.364
38083	10	41078.8	17102	0			73294.9	10485803	7.81333e+06		2.18299	1.43043	7.88761
38084	10	41158.8	17102	0			89405.6	13966841	10663440		2.55468	1.86556	10.7377
38085	10	41238.8	17102	0			54539.9	14764512	10663461		1.7503	1.96527	10.7377
38086	10	41318.8	17102	0			90812	14806441	10143438		2.58713	1.97051	10.2177
38087	10	41398.8	17102	0			6699.33	15498441	12380626		0.646587	2.05701	12.4549
38088	10	41478.8	17102	0			120374	17921656	13505965		3.26915	2.35991	13.5802
38089	10	41558.8	17102	0			66065.9	15247330	12557208		2.01622	2.02562	12.6315
38090	10	41638.8	17102	0			74439.8	17529180	13289480		2.20941	2.31085	13.3638
38091	10	41718.8	17102	0			6699.33	14475495	10455129		0.646587	1.92914	10.5294
38092	10	41798.8	17102	0			68143.4	14447004	10239672		2.06415	1.92558	10.3139
38093	10	41878.8	17102	0			77488.7	16002981	15609353		2.27975	2.12008	15.6836
38094	10	41958.8	17102	0			83139.8	15703961	9217210		2.41012	2.0827	9.29149
38095	10	42038.8	17102	0			97339.4	16036867	8728565		2.73772	2.12431	8.80284
38096	10	42118.8	17102	0			54874.6	15369693	10585003		1.75802	2.04092	10.6593
38097	10	42198.8	17102	0			6699.33	15348323	11306512		0.646587	2.03824	11.3808
38098	10	42278.8	17102	0			6699.33	16495432	13487525		0.646587	2.18163	13.5618
38099	10	42358.8	17102	0			6699.33	16896730	11806813		0.646587	2.2318	11.8811
38100	10	42438.8	17102	0			6699.33	15314479	11380537		0.646587	2.03401	11.4548
38101	10	42518.8	17102	0			6699.33	17723448	11925833		0.646587	2.33514	12.0001
38102	10	42598.8	17102	0			6699.33	14944269	8622995		0.646587	1.98774	8.69727
38103	10	42678.8	17102	0			6699.33	15929379	9183006		0.646587	2.11088	9.25728
38104	10	42758.8	17102	0			6699.33	15738510	8892430		0.646587	2.08702	8.96671
38105	10	42838.8	17102	0			6699.33	16970618	5.48784e+06		0.646587	2.24103	5.56212
38106	10	42918.8	17102	0			64646	19462296	8051973		1.98346	2.55249	8.12625
38107	10	42998.8	17102	0			6699.33	14886993	9969639		0.646587	1.98058	10.0439
38108	10	43078.8	17102	0			6699.33	16559740	9426505		0.646587	2.18967	9.50078
38109	10	43158.8	17102	0			6699.33	21206786	6607043		0.646587	2.77055	6.68132
38110	10	43238.8	17102	0			6699.33	17062658	6551804		0.646587	2.25254	6.62608
38111	10	43318.8	17102	0			6699.33	16435625	5961544		0.646587	2.17416	6.03582
38112	10	43398.8	17102	0			6699.33	17121126	5.70015e+06		0.646587	2.25984	5.77443
38113	10	43478.8	17102	0			6699.33	16122728	8.2804e+06		0.646587	2.13504	8.35468
38114	10	43558.8	17102	0			6699.33	16190653	8993316		0.646587	2.14354	9.06759
38115	10	43638.8	17102	0			6699.33	14595589	9184869		0.646587	1.94415	9.25915
38116	10	43718.8	17102	0			6699.33	12364271	12480496		0.646587	1.66524	12.5548
38117	10	43798.8	17102	0			65215.2	15172935	14560359		1.99659	2.01632	14.6346
38118	10	43878.8	17102	0			48939.4	17357158	11121440		1.62109	2.28935	11.1957
38119	10	43958.8	17102	0			60088.1	19483186	10651969		1.87831	2.5551	10.7262
38120	10	44038.8	17102	0			73538.9	21140940	11378301		2.18862	2.76232	11.4526
38121	10	44118.8	17102	0			51950.6	19165368	11073836		1.69057	2.51538	11.1481
38122	10	40998.8	17022	0			98852.3	11552464	9406940		2.77262	1.56376	9.48122
38123	10	41078.8	17022	0			69717.6	11680622	8851366		2.10046	1.57978	8.92564
38124	10	41158.8	17022	0			84857	13930212	9853298		2.44974	1.86098	9.92757
38125	10	41238.8	17022	0			123215	15204854	11360984		3.33469	2.02031	11.4353
38126	10	41318.8	17022	0			106081	15430973	12291937		2.93939	2.04858	12.3662
38127	10	41398.8	17022	0			91943.2	15147820	11383334		2.61322	2.01318	11.4576
38128	10	41478.8	17022	0			128819	16463656	11148728		3.46397	2.17766	11.223
38129	10	41558.8	17022	0			6699.33	15624752	13822425		0.646587	2.0728	13.8967
38130	10	41638.8	17022	0			6699.33	16357845	13967710		0.646587	2.16443	14.042
38131	10	41718.8	17022	0			67726	16128171	13149985		2.05452	2.13573	13.2243
38132	10	41798.8	17022	0			43095.6	16221557	14741434		1.48627	2.1474	14.8157
38133	10	41878.8	17022	0			46899.4	16399788	13790506		1.57403	2.16968	13.8648
38134	10	41958.8	17022	0			49951.1	14959820	12996812		1.64444	1.98968	13.0711
38135	10	42038.8	17022	0			73506.1	16334884	8471961		2.18787	2.16156	8.54624
38136	10	42118.8	17022	0			6699.33	16529187	11636224		0.646587	2.18585	11.7105
38137	10	42198.8	17022	0			55802.7	15998023	11324253		1.77944	2.11946	11.3985
38138	10	42278.8	17022	0			6699.33	17226588	10714783		0.646587	2.27303	10.7891
38139	10	42358.8	17022	0			86635.6	17219170	10558691		2.49077	2.2721	10.633
38140	10	42438.8	17022	0			6699.33	15580472	11366868		0.646587	2.06726	11.4411
38141	10	42518.8	17022	0			6699.33	16265444	9859644		0.646587	2.15288	9.93392
38142	10	42598.8	17022	0			6699.33	15587854	10904547		0.646587	2.06819	10.9788
38143	10	42678.8	17022	0			6699.33	15530909	9069409		0.646587	2.06107	9.14369
38144	10	42758.8	17022	0			6699.33	15977149	10540825		0.646587	2.11685	10.6151
38145	10	42838.8	17022	0			6699.33	15712068	8780870		0.646587	2.08371	8.85515
38146	10	42918.8	17022	0			6699.33	15381690	8572314		0.646587	2.04242	8.64659
38147	10	42998.8	17022	0			6699.33	15177437	9058717		0.646587	2.01688	9.13299
38148	10	43078.8	17022	0			6699.33	16332635	9674505		0.646587	2.16128	9.74878
38149	10	43158.8	17022	0			6699.33	14385623	7971746		0.646587	1.91791	8.04602
38150	10	43238.8	17022	0			6699.33	17913830	6.05101e+06		0.646587	2.35893	6.12528
38151	10	43318.8	17022	0			6699.33	16862306	6883120		0.646587	2.22749	6.9574
38152	10	43398.8	17022	0			6699.33	16382651	4.16969e+06		0.646587	2.16754	4.24397
38153	10	43478.8	17022	0			6699.33	17964614	5367051		0.646587	2.36528	5.44133
38154	10	43558.8	17022	0			6699.33	17378702	6.93979e+06		0.646587	2.29204	7.01407
38155	10	43638.8	17022	0			6699.33	15718274	7446132		0.646587	2.08449	7.52041
38156	10	43718.8	17022	0			6699.33	12380861	9664679		0.646587	1.66731	9.73896
38157	10	43798.8	17022	0			6699.33	13666445	10979227		0.646587	1.82801	11.0535
38158	10	43878.8	17022	0			6699.33	13941141	14401839		0.646587	1.86235	14.4761
38159	10	43958.8	17022	0			54261.1	15676867	14195159		1.74387	2.07931	14.2694
38160	10	44038.8	17022	0			6699.33	17219824	11668797		0.646587	2.27218	11.7431
38161	10	44118.8	17022	0			6699.33	18044796	12085446		0.646587	2.3753	12.1597
38162	10	44198.8	17022	0			6699.33	18969632	11110829		0.646587	2.49091	11.1851
38163	10	44278.8	17022	0			52500.1	19680198	10203015		1.70324	2.57973	10.2773
38164	10	40998.8	16942	0			138421	12740205	9332892		3.6855	1.71223	9.40717
38165	10	41078.8	16942	0			109393	13974996	9773512		3.0158	1.86658	9.84779
38166	10	41158.8	16942	0			103776	14345305	10558128		2.88621	1.91287	10.6324
38167	10	41238.8	16942	0			56994.1	15599234	13802526		1.80692	2.06961	13.8768
38168	10	41318.8	16942	0			78245	15355434	11228945		2.2972	2.03913	11.3032
38169	10	41398.8	16942	0			77655.2	15346108	11452627		2.28359	2.03797	11.5269
38170	10	41478.8	16942	0			63548.7	15403040	11373565		1.95814	2.04508	11.4478
38171	10	41558.8	16942	0			86887.4	17436822	12368946		2.49658	2.29931	12.4432
38172	10	41638.8	16942	0			6699.33	14856465	9725799		0.646587	1.97676	9.80008
38173	10	41718.8	16942	0			6699.33	16145723	11231723		0.646587	2.13792	11.306
38174	10	41798.8	16942	0			6699.33	14755870	11676561		0.646587	1.96419	11.7508
38175	10	41878.8	16942	0			51797.5	14989399	12069777		1.68703	1.99338	12.1441
38176	10	41958.8	16942	0			6699.33	15848468	7192544		0.646587	2.10076	7.26682
38177	10	42038.8	16942	0			80053.6	17090236	9418343		2.33892	2.25598	9.49262
38178	10	42118.8	16942	0			6699.33	16231725	15784529		0.646587	2.14867	15.8588
38179	10	42198.8	16942	0			6699.33	16789520	12362905		0.646587	2.21839	12.4372
38180	10	42278.8	16942	0			62336.6	16051447	10314393		1.93018	2.12613	10.3887
38181	10	42358.8	16942	0			6699.33	15571695	15102673		0.646587	2.06617	15.1769
38182	10	42438.8	16942	0			6699.33	15861443	12344386		0.646587	2.10238	12.4187
38183	10	42518.8	16942	0			6699.33	16160513	7.30716e+06		0.646587	2.13977	7.38143
38184	10	42598.8	16942	0			6699.33	14501928	9682407		0.646587	1.93244	9.75668
38185	10	42678.8	16942	0			6699.33	15937238	9969418		0.646587	2.11186	10.0437
38186	10	42758.8	16942	0			6699.33	15775574	9562057		0.646587	2.09165	9.63633
38187	10	42838.8	16942	0			6699.33	15890268	9962258		0.646587	2.10599	10.0365
38188	10	42918.8	16942	0			6699.33	15119451	9177573		0.646587	2.00964	9.25185
38189	10	42998.8	16942	0			6699.33	15246563	7000204		0.646587	2.02552	7.07448
38190	10	43078.8	16942	0			6699.33	14506067	8708161		0.646587	1.93296	8.78244
38191	10	43158.8	16942	0			6699.33	16213399	6.93772e+06		0.646587	2.14638	7.012
38192	10	43238.8	16942	0			6699.33	18019548	7214653		0.646587	2.37215	7.28893
38193	10	43318.8	16942	0			6699.33	16610873	6162997		0.646587	2.19606	6.23727
38194	10	43398.8	16942	0			6699.33	16582681	6427081		0.646587	2.19254	6.50136
38195	10	43478.8	16942	0			6699.33	18316486	3.15507e+06		0.646587	2.40926	3.22935
38196	10	43558.8	16942	0			6699.33	17126942	6180138		0.646587	2.26057	6.25441
38197	10	43638.8	16942	0			6699.33	17419362	4.26763e+06		0.646587	2.29712	4.34191
38198	10	43718.8	16942	0			6699.33	12233514	4918975		0.646587	1.64889	4.99325
38199	10	43798.8	16942	0			6699.33	11394572	8157450		0.646587	1.54403	8.23173
38200	10	43878.8	16942	0			6699.33	13219585	10237459		0.646587	1.77215	10.3117
38201	10	43958.8	16942	0			6699.33	13738948	11605539		0.646587	1.83707	11.6798
38202	10	44038.8	16942	0			6699.33	12544014	6008.07		0.646587	1.68771	0.0802851
38203	10	44118.8	16942	0			6699.33	12451696	6008.07		0.646587	1.67617	0.0802851
38204	10	44198.8	16942	0			6699.33	13911945	6008.07		0.646587	1.8587	0.0802851
38205	10	44278.8	16942	0			6699.33	16935492	12023311		0.646587	2.23664	12.0976
38206	10	44358.8	16942	0			45213.1	20106500	10495561		1.53513	2.63302	10.5698
38207	10	40758.8	16862	0			6699.33	1.94207e+06	47488.1		0.646587	0.362462	0.121765
38208	10	40838.8	16862	0			64043.1	2.53114e+06	268357		1.96955	0.436096	0.342634
38209	10	40918.8	16862	0			64697.7	4.70013e+06	2.35547e+06		1.98465	0.707221	2.42975
38210	10	40998.8	16862	0			67681.4	10856485	7.85619e+06		2.05349	1.47676	7.93046
38211	10	41078.8	16862	0			114874	13896252	11412428		3.14226	1.85674	11.4867
38212	10	41158.8	16862	0			80766.6	15898537	12894061		2.35537	2.10702	12.9683
38213	10	41238.8	16862	0			56243.7	13586209	10806654		1.78961	1.81798	10.8809
38214	10	41318.8	16862	0			55705.2	15941490	13267760		1.77719	2.11239	13.342
38215	10	41398.8	16862	0			41137.1	14930730	13391403		1.44109	1.98605	13.4657
38216	10	41478.8	16862	0			61950.2	15708425	13066623		1.92126	2.08326	13.1409
38217	10	41558.8	16862	0			6699.33	13952246	13317351		0.646587	1.86373	13.3916
38218	10	41638.8	16862	0			92765.2	16740652	10587049		2.63219	2.21229	10.6613
38219	10	41718.8	16862	0			48278.9	15492747	13233740		1.60586	2.0563	13.308
38220	10	41798.8	16862	0			61300.8	15805469	11129256		1.90628	2.09539	11.2035
38221	10	41878.8	16862	0			86637.3	17029650	8922187		2.49081	2.24841	8.99646
38222	10	41958.8	16862	0			6699.33	15048808	10030152		0.646587	2.00081	10.1044
38223	10	42038.8	16862	0			6699.33	14805810	10350932		0.646587	1.97043	10.4252
38224	10	42118.8	16862	0			6699.33	14677618	10389363		0.646587	1.95441	10.4636
38225	10	42198.8	16862	0			6699.33	16011935	10433098		0.646587	2.1212	10.5074
38226	10	42278.8	16862	0			6699.33	14439894	11802476		0.646587	1.92469	11.8768
38227	10	42358.8	16862	0			6699.33	15234158	11805540		0.646587	2.02397	11.8798
38228	10	42438.8	16862	0			6699.33	16220790	11496730		0.646587	2.1473	11.571
38229	10	42518.8	16862	0			6699.33	14923813	10141259		0.646587	1.98518	10.2155
38230	10	42598.8	16862	0			6699.33	14609235	10596702		0.646587	1.94586	10.671
38231	10	42678.8	16862	0			6699.33	14861215	10635293		0.646587	1.97736	10.7096
38232	10	42758.8	16862	0			6699.33	15082645	9562256		0.646587	2.00503	9.63653
38233	10	42838.8	16862	0			6699.33	16270126	7683280		0.646587	2.15347	7.75756
38234	10	42918.8	16862	0			73682.3	15172041	5.13229e+06		2.19193	2.01621	5.20656
38235	10	42998.8	16862	0			6699.33	15281214	6455811		0.646587	2.02986	6.53009
38236	10	43078.8	16862	0			6699.33	15566418	7953097		0.646587	2.06551	8.02737
38237	10	43158.8	16862	0			6699.33	16294972	7.93748e+06		0.646587	2.15658	8.01176
38238	10	43238.8	16862	0			6699.33	16666194	5533492		0.646587	2.20298	5.60777
38239	10	43318.8	16862	0			6699.33	17118326	5508126		0.646587	2.25949	5.5824
38240	10	43398.8	16862	0			6699.33	16424176	6.87272e+06		0.646587	2.17273	6.947
38241	10	43478.8	16862	0			6699.33	16928832	5777786		0.646587	2.23581	5.85206
38242	10	43558.8	16862	0			6699.33	17408992	6771108		0.646587	2.29583	6.84539
38243	10	43638.8	16862	0			6699.33	17697186	4202676		0.646587	2.33185	4.27695
38244	10	43718.8	16862	0			6699.33	14567187	3.74596e+06		0.646587	1.9406	3.82023
38245	10	43798.8	16862	0			6699.33	12742394	5300232		0.646587	1.7125	5.37451
38246	10	43878.8	16862	0			6699.33	15959584	6.61735e+06		0.646587	2.11465	6.69163
38247	10	43958.8	16862	0			6699.33	13075040	6.82605e+06		0.646587	1.75408	6.90033
38248	10	44038.8	16862	0			6699.33	13529815	8292921		0.646587	1.81093	8.3672
38249	10	44118.8	16862	0			6699.33	15193578	9475623		0.646587	2.0189	9.5499
38250	10	44198.8	16862	0			6699.33	13313265	9612346		0.646587	1.78386	9.68662
38251	10	44278.8	16862	0			6699.33	12640963	14608275		0.646587	1.69982	14.6826
38252	10	44358.8	16862	0			6699.33	17386490	6008.07		0.646587	2.29302	0.0802851
38253	10	44438.8	16862	0			6699.33	19276208	13767009		0.646587	2.52923	13.8413
38254	10	44518.8	16862	0			60255.8	22704752	11080728		1.88217	2.9578	11.155
38255	10	40598.8	16782	0			45094.4	726776	6008.07		1.53239	0.210551	0.0802851
38256	10	40678.8	16782	0			6699.33	1.29713e+06	241486		0.646587	0.281846	0.315763
38257	10	40758.8	16782	0			71286.6	3410023	2.53773e+06		2.13666	0.545957	2.612
38258	10	40838.8	16782	0			79527.6	5.18103e+06	4.45197e+06		2.32679	0.767333	4.52624
38259	10	40918.8	16782	0			81624.7	7.97132e+06	6874500		2.37517	1.11612	6.94878
38260	10	40998.8	16782	0			110374	10963194	9205861		3.03844	1.4901	9.28014
38261	10	41078.8	16782	0			92341.4	13128193	9923430		2.62241	1.76073	9.99771
38262	10	41158.8	16782	0			65537.3	14860231	12795393		2.00402	1.97723	12.8697
38263	10	41238.8	16782	0			102330	15142141	11962079		2.85286	2.01247	12.0364
38264	10	41318.8	16782	0			81553.6	14539179	12176893		2.37353	1.9371	12.2512
38265	10	41398.8	16782	0			125697	16005584	12278087		3.39195	2.1204	12.3524
38266	10	41478.8	16782	0			6699.33	13606882	13690136		0.646587	1.82056	13.7644
38267	10	41558.8	16782	0			51349.8	13953999	14193789		1.6767	1.86395	14.2681
38268	10	41638.8	16782	0			101507	15174897	9465207		2.83386	2.01657	9.53948
38269	10	41718.8	16782	0			66940.1	16859594	11727940		2.03639	2.22715	11.8022
38270	10	41798.8	16782	0			6699.33	14993470	14698531		0.646587	1.99389	14.7728
38271	10	41878.8	16782	0			6699.33	15250519	12829828		0.646587	2.02602	12.9041
38272	10	41958.8	16782	0			48584.9	16918578	13748370		1.61292	2.23453	13.8226
38273	10	42038.8	16782	0			68650.6	16992722	13174722		2.07585	2.24379	13.249
38274	10	42118.8	16782	0			6699.33	15396939	14536789		0.646587	2.04432	14.6111
38275	10	42198.8	16782	0			6699.33	15655161	9818313		0.646587	2.0766	9.89259
38276	10	42278.8	16782	0			6699.33	15261321	12810116		0.646587	2.02737	12.8844
38277	10	42358.8	16782	0			6699.33	15989274	10942488		0.646587	2.11836	11.0168
38278	10	42438.8	16782	0			77658	19500946	10121932		2.28365	2.55732	10.1962
38279	10	42518.8	16782	0			6699.33	19093840	12770766		0.646587	2.50643	12.845
38280	10	42598.8	16782	0			69952.4	21274372	11733132		2.10588	2.779	11.8074
38281	10	42678.8	16782	0			42653.5	19019958	12461742		1.47608	2.4972	12.536
38282	10	42758.8	16782	0			60821	16645611	11837904		1.89521	2.20041	11.9122
38283	10	42838.8	16782	0			6699.33	15672504	10541830		0.646587	2.07877	10.6161
38284	10	42918.8	16782	0			73943.6	15509114	8761255		2.19796	2.05834	8.83553
38285	10	42998.8	16782	0			6699.33	15661407	9744325		0.646587	2.07738	9.8186
38286	10	43078.8	16782	0			6699.33	17282088	9667784		0.646587	2.27996	9.74206
38287	10	43158.8	16782	0			6699.33	16769412	7.59252e+06		0.646587	2.21588	7.6668
38288	10	43238.8	16782	0			6699.33	17553792	7.74085e+06		0.646587	2.31393	7.81512
38289	10	43318.8	16782	0			6699.33	16906296	8250257		0.646587	2.23299	8.32453
38290	10	43398.8	16782	0			6699.33	16811788	6.97883e+06		0.646587	2.22118	7.05311
38291	10	43478.8	16782	0			6699.33	18363944	5872550		0.646587	2.4152	5.94683
38292	10	43558.8	16782	0			6699.33	17865100	6.12536e+06		0.646587	2.35284	6.19964
38293	10	43638.8	16782	0			6699.33	17417730	5.8842e+06		0.646587	2.29692	5.95848
38294	10	43718.8	16782	0			6699.33	16009577	5.41635e+06		0.646587	2.1209	5.49062
38295	10	43798.8	16782	0			6699.33	17454844	4.43371e+06		0.646587	2.30156	4.50798
38296	10	43878.8	16782	0			6699.33	16737299	4849515		0.646587	2.21187	4.92379
38297	10	43958.8	16782	0			6699.33	15475784	4.40095e+06		0.646587	2.05418	4.47523
38298	10	44038.8	16782	0			6699.33	17186648	2.90501e+06		0.646587	2.26803	2.97928
38299	10	44118.8	16782	0			6699.33	18481786	2.69651e+06		0.646587	2.42993	2.77079
38300	10	44198.8	16782	0			6699.33	10105073	11113332		0.646587	1.38284	11.1876
38301	10	44278.8	16782	0			6699.33	14629731	10202687		0.646587	1.94842	10.277
38302	10	44358.8	16782	0			6699.33	12933415	14798574		0.646587	1.73638	14.8729
38303	10	44438.8	16782	0			6699.33	14459265	6008.07		0.646587	1.92711	0.0802851
38304	10	44518.8	16782	0			55179.6	21010404	9780136		1.76506	2.746	9.85441
38305	10	44598.8	16782	0			90227.7	21694890	8515261		2.57365	2.83157	8.58954
38306	10	44678.8	16782	0			136460	19690464	8477775		3.64026	2.58101	8.55205
38307	10	40438.8	16702	0			6699.33	629640	6008.07		0.646587	0.198409	0.0802851
38308	10	40518.8	16702	0			75034.2	992164	6008.07		2.22312	0.243725	0.0802851
38309	10	40598.8	16702	0			91614.1	1.32284e+06	759700		2.60563	0.285059	0.833977
38310	10	40678.8	16702	0			95882.7	3616511	3.00668e+06		2.70411	0.571768	3.08096
38311	10	40758.8	16702	0			86612.4	7003512	4.86935e+06		2.49024	0.995143	4.94363
38312	10	40838.8	16702	0			6699.33	8590328	7096725		0.646587	1.19349	7.171
38313	10	40918.8	16702	0			109309	10970307	9114845		3.01386	1.49099	9.18912
38314	10	40998.8	16702	0			84881.8	12736540	9935351		2.45031	1.71177	10.0096
38315	10	41078.8	16702	0			85526.3	13748755	13365115		2.46518	1.8383	13.4394
38316	10	41158.8	16702	0			113187	13841373	11224891		3.10334	1.84988	11.2992
38317	10	41238.8	16702	0			51788.6	14106806	11898322		1.68683	1.88305	11.9726
38318	10	41318.8	16702	0			90249.8	15211420	14031262		2.57416	2.02113	14.1055
38319	10	41398.8	16702	0			75818.3	14193611	13857164		2.24121	1.89391	13.9314
38320	10	41478.8	16702	0			6699.33	14156787	13035221		0.646587	1.8893	13.1095
38321	10	41558.8	16702	0			73298.1	14208148	12953291		2.18307	1.89572	13.0276
38322	10	41638.8	16702	0			65101.8	13776229	9359515		1.99397	1.84173	9.43379
38323	10	41718.8	16702	0			6699.33	14934776	9172714		0.646587	1.98655	9.24699
38324	10	41798.8	16702	0			6699.33	14324199	13022703		0.646587	1.91023	13.097
38325	10	41878.8	16702	0			6699.33	15700618	10303329		0.646587	2.08228	10.3776
38326	10	41958.8	16702	0			6699.33	15441218	8.00484e+06		0.646587	2.04986	8.07912
38327	10	42038.8	16702	0			6699.33	15424861	9335223		0.646587	2.04781	9.4095
38328	10	42118.8	16702	0			69116.5	16179269	7.56525e+06		2.0866	2.14211	7.63953
38329	10	42198.8	16702	0			71235.9	15439432	6.94295e+06		2.13549	2.04963	7.01722
38330	10	42278.8	16702	0			6699.33	13533296	10091140		0.646587	1.81137	10.1654
38331	10	42358.8	16702	0			6699.33	15311065	13230879		0.646587	2.03359	13.3052
38332	10	42438.8	16702	0			50955.2	17748532	13840460		1.6676	2.33827	13.9147
38333	10	42518.8	16702	0			71664.5	20802650	9895715		2.14538	2.72004	9.96999
38334	10	42598.8	16702	0			59701.5	24714964	11920496		1.86939	3.20907	11.9948
38335	10	42678.8	16702	0			6699.33	20942348	12913205		0.646587	2.7375	12.9875
38336	10	42758.8	16702	0			6699.33	18986584	13196094		0.646587	2.49303	13.2704
38337	10	42838.8	16702	0			54935.2	17813656	12867428		1.75942	2.34641	12.9417
38338	10	42918.8	16702	0			6699.33	16010612	10853564		0.646587	2.12103	10.9278
38339	10	42998.8	16702	0			6699.33	16677701	8576590		0.646587	2.20442	8.65087
38340	10	43078.8	16702	0			6699.33	17979556	6852360		0.646587	2.36715	6.92664
38341	10	43158.8	16702	0			6699.33	15286934	8726541		0.646587	2.03057	8.80082
38342	10	43238.8	16702	0			6699.33	17930716	6883440		0.646587	2.36104	6.95772
38343	10	43318.8	16702	0			6699.33	16363138	7862025		0.646587	2.1651	7.9363
38344	10	43398.8	16702	0			6699.33	17672402	5.68347e+06		0.646587	2.32875	5.75775
38345	10	43478.8	16702	0			6699.33	19166252	7.3426e+06		0.646587	2.51549	7.41688
38346	10	43558.8	16702	0			6699.33	19072878	4.52814e+06		0.646587	2.50381	4.60242
38347	10	43638.8	16702	0			6699.33	17257170	3.32808e+06		0.646587	2.27685	3.40236
38348	10	43718.8	16702	0			6699.33	17788686	5075489		0.646587	2.34329	5.14977
38349	10	43798.8	16702	0			6699.33	17173814	5.0006e+06		0.646587	2.26643	5.07488
38350	10	43878.8	16702	0			6699.33	16806100	5.06051e+06		0.646587	2.22047	5.13478
38351	10	43958.8	16702	0			6699.33	17754302	3.07788e+06		0.646587	2.33899	3.15215
38352	10	44038.8	16702	0			6699.33	13816527	4.08492e+06		0.646587	1.84677	4.1592
38353	10	44118.8	16702	0			6699.33	14414781	4221383		0.646587	1.92155	4.29566
38354	10	44198.8	16702	0			6699.33	18797260	4883555		0.646587	2.46936	4.95783
38355	10	44278.8	16702	0			6699.33	14040909	9512926		0.646587	1.87482	9.5872
38356	10	44358.8	16702	0			6699.33	14318216	6008.07		0.646587	1.90948	0.0802851
38357	10	44438.8	16702	0			6699.33	14449364	6008.07		0.646587	1.92587	0.0802851
38358	10	44518.8	16702	0			44477	14910718	12763028		1.51814	1.98354	12.8373
38359	10	44598.8	16702	0			159708	18793786	8091362		4.17662	2.46893	8.16564
38360	10	44678.8	16702	0			271175	18954894	4989534		6.74824	2.48907	5.06381
38361	10	44758.8	16702	0			140105	12733227	3079967		3.72435	1.71136	3.15424
38362	10	40278.8	16622	0			6699.33	7210.79	33547		0.646587	0.120605	0.107824
38363	10	40358.8	16622	0			57514.9	441757	58505.6		1.81894	0.174924	0.132783
38364	10	40438.8	16622	0			51285.3	2403018	2.18127e+06		1.67522	0.420081	2.25554
38365	10	40518.8	16622	0			76241.4	3.57046e+06	3.61178e+06		2.25097	0.566011	3.68605
38366	10	40598.8	16622	0			70468.2	4.14653e+06	3.55681e+06		2.11778	0.63802	3.63109
38367	10	40678.8	16622	0			90046.7	6.40297e+06	6.03253e+06		2.56947	0.920075	6.10681
38368	10	40758.8	16622	0			143081	9338008	8.05889e+06		3.79301	1.28696	8.13317
38369	10	40838.8	16622	0			75560.9	10975579	10872512		2.23527	1.49165	10.9468
38370	10	40918.8	16622	0			78055.9	10902812	9512675		2.29283	1.48256	9.58695
38371	10	40998.8	16622	0			44216.9	11133669	11405592		1.51214	1.51141	11.4799
38372	10	41078.8	16622	0			92038.7	13966010	12032126		2.61543	1.86546	12.1064
38373	10	41158.8	16622	0			40564.1	13220853	13492615		1.42787	1.77231	13.5669
38374	10	41238.8	16622	0			6699.33	13932241	14872348		0.646587	1.86123	14.9466
38375	10	41318.8	16622	0			58063.7	15571135	12972586		1.8316	2.0661	13.0469
38376	10	41398.8	16622	0			6699.33	12790823	13962640		0.646587	1.71856	14.0369
38377	10	41478.8	16622	0			6699.33	14738929	15255090		0.646587	1.96207	15.3294
38378	10	41558.8	16622	0			73036.5	15757353	12533267		2.17703	2.08937	12.6075
38379	10	41638.8	16622	0			6699.33	13731614	9159821		0.646587	1.83616	9.2341
38380	10	41718.8	16622	0			6699.33	15625817	8942045		0.646587	2.07293	9.01632
38381	10	41798.8	16622	0			6699.33	15261325	13120894		0.646587	2.02737	13.1952
38382	10	41878.8	16622	0			6699.33	15366524	13232871		0.646587	2.04052	13.3071
38383	10	41958.8	16622	0			6699.33	16348026	11371726		0.646587	2.16321	11.446
38384	10	42038.8	16622	0			6699.33	17750570	7.75919e+06		0.646587	2.33853	7.83347
38385	10	42118.8	16622	0			6699.33	15105651	9684914		0.646587	2.00791	9.75919
38386	10	42198.8	16622	0			6699.33	15086548	10036853		0.646587	2.00552	10.1111
38387	10	42278.8	16622	0			6699.33	15950268	7.34093e+06		0.646587	2.11349	7.41521
38388	10	42358.8	16622	0			6699.33	15220876	10116911		0.646587	2.02231	10.1912
38389	10	42438.8	16622	0			6699.33	19208184	14019623		0.646587	2.52073	14.0939
38390	10	42518.8	16622	0			52821.1	20100672	11421828		1.71065	2.63229	11.4961
38391	10	42598.8	16622	0			53734.7	23026108	10686122		1.73173	2.99797	10.7604
38392	10	42678.8	16622	0			67438.8	22681578	10746592		2.04789	2.9549	10.8209
38393	10	42758.8	16622	0			75763.7	21959828	11837114		2.23995	2.86468	11.9114
38394	10	42838.8	16622	0			6699.33	22059552	12737655		0.646587	2.87715	12.8119
38395	10	42918.8	16622	0			6699.33	17953492	11857909		0.646587	2.36389	11.9322
38396	10	42998.8	16622	0			6699.33	16731769	10493070		0.646587	2.21118	10.5673
38397	10	43078.8	16622	0			6699.33	16665872	8816835		0.646587	2.20294	8.89111
38398	10	43158.8	16622	0			6699.33	17676224	8742323		0.646587	2.32923	8.8166
38399	10	43238.8	16622	0			6699.33	17905970	6.39089e+06		0.646587	2.35795	6.46517
38400	10	43318.8	16622	0			74693.2	17568618	8329031		2.21525	2.31578	8.40331
38401	10	43398.8	16622	0			6699.33	18731632	9470777		0.646587	2.46116	9.54505
38402	10	43478.8	16622	0			6699.33	16958514	8.19318e+06		0.646587	2.23952	8.26746
38403	10	43558.8	16622	0			6699.33	17258600	6954273		0.646587	2.27703	7.02855
38404	10	43638.8	16622	0			6699.33	17347830	7720921		0.646587	2.28818	7.7952
38405	10	43718.8	16622	0			6699.33	16153107	7.66403e+06		0.646587	2.13884	7.73831
38406	10	43798.8	16622	0			6699.33	17394760	4.33678e+06		0.646587	2.29405	4.41106
38407	10	43878.8	16622	0			6699.33	19850138	5174202		0.646587	2.60097	5.24848
38408	10	43958.8	16622	0			6699.33	17956944	2.95128e+06		0.646587	2.36432	3.02556
38409	10	44038.8	16622	0			6699.33	12734287	174543		0.646587	1.71149	0.24882
38410	10	44118.8	16622	0			6699.33	9813410	314000		0.646587	1.34638	0.388277
38411	10	44198.8	16622	0			6699.33	20023220	4.41884e+06		0.646587	2.62261	4.49312
38412	10	44278.8	16622	0			6699.33	14567654	8.20098e+06		0.646587	1.94066	8.27526
38413	10	44358.8	16622	0			6699.33	15260916	9896261		0.646587	2.02732	9.97054
38414	10	44438.8	16622	0			6699.33	14318105	13667083		0.646587	1.90947	13.7414
38415	10	44518.8	16622	0			6699.33	16792784	14834663		0.646587	2.2188	14.9089
38416	10	44598.8	16622	0			173371	16037235	9951895		4.49182	2.12436	10.0262
38417	10	44678.8	16622	0			118606	11360282	4.26713e+06		3.22835	1.53974	4.34141
38418	10	44758.8	16622	0			160081	11847508	1.86823e+06		4.18521	1.60064	1.94251
38419	10	44838.8	16622	0			176743	10662581	2.1292e+06		4.56962	1.45253	2.20348
38420	10	40198.8	16542	0			66363.2	580515	6008.07		2.02308	0.192268	0.0802851
38421	10	40278.8	16542	0			69896	1.08388e+06	688220		2.10458	0.255189	0.762497
38422	10	40358.8	16542	0			109363	4.05633e+06	4581281		3.01511	0.626745	4.65556
38423	10	40438.8	16542	0			126416	7.2391e+06	7670943		3.40855	1.02459	7.74522
38424	10	40518.8	16542	0			106175	8.24768e+06	9117657		2.94156	1.15066	9.19193
38425	10	40598.8	16542	0			101392	7.86017e+06	8577681		2.83122	1.10223	8.65196
38426	10	40678.8	16542	0			91673.1	9087412	9539468		2.60699	1.25563	9.61374
38427	10	40758.8	16542	0			60879.8	11046547	11752752		1.89657	1.50052	11.827
38428	10	40838.8	16542	0			110531	12277570	11064077		3.04206	1.6544	11.1384
38429	10	40918.8	16542	0			64753.7	13542622	12931381		1.98594	1.81253	13.0057
38430	10	40998.8	16542	0			90863.1	13366274	12785010		2.5883	1.79049	12.8593
38431	10	41078.8	16542	0			47887.2	13994471	14628684		1.59682	1.86901	14.703
38432	10	41158.8	16542	0			67259.3	13693713	12219121		2.04375	1.83142	12.2934
38433	10	41238.8	16542	0			6699.33	12295155	12234525		0.646587	1.6566	12.3088
38434	10	41318.8	16542	0			6699.33	15471204	12216544		0.646587	2.0536	12.2908
38435	10	41398.8	16542	0			63250.7	14210569	13129000		1.95127	1.89603	13.2033
38436	10	41478.8	16542	0			6699.33	14823370	15192731		0.646587	1.97263	15.267
38437	10	41558.8	16542	0			68113.2	14736277	9326661		2.06345	1.96174	9.40094
38438	10	41638.8	16542	0			6699.33	13973877	12059417		0.646587	1.86644	12.1337
38439	10	41718.8	16542	0			51875.9	14728254	13295554		1.68884	1.96074	13.3698
38440	10	41798.8	16542	0			6699.33	15708169	13746719		0.646587	2.08323	13.821
38441	10	41878.8	16542	0			6699.33	15894096	13673724		0.646587	2.10647	13.748
38442	10	41958.8	16542	0			6699.33	15708157	11602507		0.646587	2.08322	11.6768
38443	10	42038.8	16542	0			62780.1	16550027	11286743		1.94041	2.18846	11.361
38444	10	42118.8	16542	0			6699.33	16579659	11192922		0.646587	2.19216	11.2672
38445	10	42198.8	16542	0			56135.9	16321495	10949389		1.78712	2.15989	11.0237
38446	10	42278.8	16542	0			6699.33	15445429	9243599		0.646587	2.05038	9.31788
38447	10	42358.8	16542	0			45800.9	15047619	9552110		1.54869	2.00066	9.62639
38448	10	42438.8	16542	0			59442.2	20784492	12308300		1.8634	2.71777	12.3826
38449	10	42518.8	16542	0			69774.6	21116620	10385732		2.10178	2.75928	10.46
38450	10	42598.8	16542	0			99624.9	24494726	9754491		2.79045	3.18154	9.82877
38451	10	42678.8	16542	0			57142.8	23232760	12238335		1.81035	3.0238	12.3126
38452	10	42758.8	16542	0			98872.5	24045176	10742623		2.77309	3.12535	10.8169
38453	10	42838.8	16542	0			6699.33	21779858	12507617		0.646587	2.84219	12.5819
38454	10	42918.8	16542	0			6699.33	18198478	12900529		0.646587	2.39451	12.9748
38455	10	42998.8	16542	0			6699.33	16619941	13560870		0.646587	2.1972	13.6351
38456	10	43078.8	16542	0			6699.33	16178805	7784420		0.646587	2.14205	7.8587
38457	10	43158.8	16542	0			81743.4	20016556	8.18214e+06		2.37791	2.62177	8.25642
38458	10	43238.8	16542	0			6699.33	16652021	8.02238e+06		0.646587	2.20121	8.09666
38459	10	43318.8	16542	0			6699.33	17488930	6062897		0.646587	2.30582	6.13717
38460	10	43398.8	16542	0			6699.33	18733810	8866141		0.646587	2.46143	8.94042
38461	10	43478.8	16542	0			6699.33	17618342	9608554		0.646587	2.322	9.68283
38462	10	43558.8	16542	0			6699.33	17617102	7.35355e+06		0.646587	2.32184	7.42782
38463	10	43638.8	16542	0			6699.33	17852396	8752833		0.646587	2.35125	8.82711
38464	10	43718.8	16542	0			6699.33	16141544	7.60752e+06		0.646587	2.1374	7.6818
38465	10	43798.8	16542	0			6699.33	16205322	5.39994e+06		0.646587	2.14537	5.47421
38466	10	43878.8	16542	0			6699.33	17755726	6.25166e+06		0.646587	2.33917	6.32594
38467	10	43958.8	16542	0			6699.33	19648786	5.04039e+06		0.646587	2.5758	5.11467
38468	10	44038.8	16542	0			58920.3	21350628	3915182		1.85136	2.78853	3.98946
38469	10	44118.8	16542	0			6699.33	18179666	4.07552e+06		0.646587	2.39216	4.1498
38470	10	44198.8	16542	0			6699.33	16327208	4.16467e+06		0.646587	2.1606	4.23894
38471	10	44278.8	16542	0			6699.33	14892440	7450860		0.646587	1.98126	7.52514
38472	10	44358.8	16542	0			6699.33	13592361	10266456		0.646587	1.81875	10.3407
38473	10	44438.8	16542	0			6699.33	13519827	10069082		0.646587	1.80968	10.1434
38474	10	44518.8	16542	0			6699.33	16814936	12701286		0.646587	2.22157	12.7756
38475	10	44598.8	16542	0			137843	16720668	12017424		3.67216	2.20979	12.0917
38476	10	44678.8	16542	0			285390	15500055	10788561		7.07618	2.05721	10.8628
38477	10	44758.8	16542	0			166786	9637442	2.67199e+06		4.3399	1.32438	2.74627
38478	10	44838.8	16542	0			152886	10700027	898314		4.01923	1.45721	0.972591
38479	10	44918.8	16542	0			131711	8932131	1086211		3.53069	1.23622	1.16049
38480	10	44998.8	16542	0			167369	7.5974e+06	866094		4.35335	1.06938	0.940371
38481	10	40038.8	16462	0			6699.33	541238	6008.07		0.646587	0.187359	0.0802851
38482	10	40118.8	16462	0			88236.2	609534	6008.07		2.5277	0.195896	0.0802851
38483	10	40198.8	16462	0			59598.1	7210.79	2.27206e+06		1.867	0.120605	2.34634
38484	10	40278.8	16462	0			49778.6	6428741	7637353		1.64046	0.923297	7.71163
38485	10	40358.8	16462	0			131033	7734926	8933383		3.51505	1.08657	9.00766
38486	10	40438.8	16462	0			72915.4	9694735	10967056		2.17424	1.33155	11.0413
38487	10	40518.8	16462	0			64410	9937556	12378031		1.97801	1.3619	12.4523
38488	10	40598.8	16462	0			107757	9813859	9068953		2.97806	1.34644	9.14323
38489	10	40678.8	16462	0			85386.3	9693993	9761704		2.46195	1.33145	9.83598
38490	10	40758.8	16462	0			70834.1	12149391	12910041		2.12622	1.63838	12.9843
38491	10	40838.8	16462	0			145389	12149525	10784494		3.84626	1.63839	10.8588
38492	10	40918.8	16462	0			6699.33	11127133	10952604		0.646587	1.5106	11.0269
38493	10	40998.8	16462	0			6699.33	12280418	13481427		0.646587	1.65476	13.5557
38494	10	41078.8	16462	0			83689.9	13285964	11851687		2.42281	1.78045	11.926
38495	10	41158.8	16462	0			52632	12586904	10532990		1.70629	1.69307	10.6073
38496	10	41238.8	16462	0			6699.33	13845834	9618595		0.646587	1.85043	9.69287
38497	10	41318.8	16462	0			6699.33	13450811	11685788		0.646587	1.80106	11.7601
38498	10	41398.8	16462	0			64666.3	13702968	11573581		1.98393	1.83258	11.6479
38499	10	41478.8	16462	0			6699.33	13771053	13907730		0.646587	1.84109	13.982
38500	10	41558.8	16462	0			87444.1	15556013	10402130		2.50943	2.06421	10.4764
38501	10	41638.8	16462	0			57621.8	14697703	11781134		1.82141	1.95692	11.8554
38502	10	41718.8	16462	0			6699.33	15798335	10793887		0.646587	2.0945	10.8682
38503	10	41798.8	16462	0			6699.33	13819064	13704051		0.646587	1.84709	13.7783
38504	10	41878.8	16462	0			6699.33	16322971	8.21145e+06		0.646587	2.16008	8.28572
38505	10	41958.8	16462	0			6699.33	15867220	8732260		0.646587	2.10311	8.80654
38506	10	42038.8	16462	0			6699.33	15642699	10198040		0.646587	2.07504	10.2723
38507	10	42118.8	16462	0			6699.33	17985650	8377598		0.646587	2.36791	8.45187
38508	10	42198.8	16462	0			6699.33	15040724	10175112		0.646587	1.99979	10.2494
38509	10	42278.8	16462	0			6699.33	15170429	10112356		0.646587	2.01601	10.1866
38510	10	42358.8	16462	0			6699.33	15848072	8658882		0.646587	2.10071	8.73316
38511	10	42438.8	16462	0			64749.8	21036900	9361879		1.98585	2.74932	9.43616
38512	10	42518.8	16462	0			54422.7	22920042	12488010		1.7476	2.98471	12.5623
38513	10	42598.8	16462	0			53922.1	22313332	10938925		1.73605	2.90887	11.0132
38514	10	42678.8	16462	0			189901	25487984	9406104		4.87318	3.3057	9.48038
38515	10	42758.8	16462	0			100530	25207992	9525140		2.81134	3.2707	9.59942
38516	10	42838.8	16462	0			173951	24557036	8716889		4.5052	3.18933	8.79117
38517	10	42918.8	16462	0			6699.33	19640952	14837003		0.646587	2.57482	14.9113
38518	10	42998.8	16462	0			6699.33	16143279	7200146		0.646587	2.13761	7.27442
38519	10	43078.8	16462	0			6699.33	16813408	7343957		0.646587	2.22138	7.41823
38520	10	43158.8	16462	0			6699.33	16186040	12933899		0.646587	2.14296	13.0082
38521	10	43238.8	16462	0			6699.33	17379834	7983032		0.646587	2.29218	8.05731
38522	10	43318.8	16462	0			6699.33	17435482	9342075		0.646587	2.29914	9.41635
38523	10	43398.8	16462	0			6699.33	18095650	8903152		0.646587	2.38166	8.97743
38524	10	43478.8	16462	0			6699.33	16783152	9509936		0.646587	2.2176	9.58421
38525	10	43558.8	16462	0			6699.33	20044656	5.1317e+06		0.646587	2.62529	5.20598
38526	10	43638.8	16462	0			6699.33	17812710	8.36173e+06		0.646587	2.34629	8.43601
38527	10	43718.8	16462	0			6699.33	17346208	7.53003e+06		0.646587	2.28798	7.60431
38528	10	43798.8	16462	0			6699.33	17614558	7.20991e+06		0.646587	2.32152	7.28418
38529	10	43878.8	16462	0			6699.33	18226696	5.87519e+06		0.646587	2.39804	5.94947
38530	10	43958.8	16462	0			6699.33	17720260	9475087		0.646587	2.33474	9.54936
38531	10	44038.8	16462	0			6699.33	19684410	5.12982e+06		0.646587	2.58026	5.2041
38532	10	44118.8	16462	0			6699.33	20020416	5045438		0.646587	2.62226	5.11972
38533	10	44198.8	16462	0			6699.33	15173667	4834586		0.646587	2.01641	4.90886
38534	10	44278.8	16462	0			6699.33	15325203	7.04558e+06		0.646587	2.03535	7.11986
38535	10	44358.8	16462	0			6699.33	14592947	8343346		0.646587	1.94382	8.41762
38536	10	44438.8	16462	0			6699.33	13995604	9892395		0.646587	1.86915	9.96667
38537	10	44518.8	16462	0			6699.33	15903227	12631677		0.646587	2.10761	12.706
38538	10	44598.8	16462	0			6699.33	15575063	15336939		0.646587	2.06659	15.4112
38539	10	44678.8	16462	0			106799	15935077	14531811		2.95597	2.11159	14.6061
38540	10	44758.8	16462	0			377068	11659018	5368682		9.19125	1.57708	5.44296
38541	10	44838.8	16462	0			110900	7210.79	905602		3.05057	0.120605	0.979879
38542	10	44918.8	16462	0			355352	11127650	1.40419e+06		8.69025	1.51066	1.47847
38543	10	44998.8	16462	0			257630	8780389	1.075e+06		6.43575	1.21725	1.14928
38544	10	45078.8	16462	0			234176	9116844	1.30688e+06		5.89463	1.25931	1.38116
38545	10	39958.8	16382	0			77821.1	704113	6008.07		2.28742	0.207718	0.0802851
38546	10	40038.8	16382	0			66775.8	687399	180288		2.03259	0.205629	0.254565
38547	10	40118.8	16382	0			125808	3492102	3.53169e+06		3.39452	0.556217	3.60597
38548	10	40198.8	16382	0			112704	7.83276e+06	7757642		3.09218	1.0988	7.83192
38549	10	40278.8	16382	0			102696	8.26167e+06	9557394		2.8613	1.15241	9.63167
38550	10	40358.8	16382	0			145240	10525094	12420792		3.84283	1.43534	12.4951
38551	10	40438.8	16382	0			120501	11166420	13598494		3.27206	1.51551	13.6728
38552	10	40518.8	16382	0			97330.4	12269984	15918585		2.73751	1.65345	15.9929
38553	10	40598.8	16382	0			160101	13034908	13907068		4.18567	1.74907	13.9813
38554	10	40678.8	16382	0			94836.3	12185110	12484087		2.67997	1.64284	12.5584
38555	10	40758.8	16382	0			141035	13511739	13133798		3.7458	1.80867	13.2081
38556	10	40838.8	16382	0			78428.5	13545490	13893749		2.30143	1.81289	13.968
38557	10	40918.8	16382	0			54116.6	12891932	15908004		1.74054	1.7312	15.9823
38558	10	40998.8	16382	0			67806.4	14226976	15522035		2.05637	1.89808	15.5963
38559	10	41078.8	16382	0			131756	14344502	12988586		3.53173	1.91277	13.0629
38560	10	41158.8	16382	0			6699.33	14767362	17525536		0.646587	1.96562	17.5998
38561	10	41238.8	16382	0			80308	15528270	11957006		2.34479	2.06074	12.0313
38562	10	41318.8	16382	0			67593.7	15067495	9357039		2.05146	2.00314	9.43132
38563	10	41398.8	16382	0			6699.33	14454443	16788224		0.646587	1.92651	16.8625
38564	10	41478.8	16382	0			6699.33	15923625	12636819		0.646587	2.11016	12.7111
38565	10	41558.8	16382	0			55231.6	14810585	12618974		1.76626	1.97103	12.6933
38566	10	41638.8	16382	0			76314.3	16282371	8624747		2.25265	2.155	8.69902
38567	10	41718.8	16382	0			6699.33	16853504	9517322		0.646587	2.22639	9.5916
38568	10	41798.8	16382	0			6699.33	14141601	12509787		0.646587	1.8874	12.5841
38569	10	41878.8	16382	0			6699.33	17042792	10602840		0.646587	2.25005	10.6771
38570	10	41958.8	16382	0			6699.33	17106276	9947205		0.646587	2.25799	10.0215
38571	10	42038.8	16382	0			6699.33	15997449	11967009		0.646587	2.11939	12.0413
38572	10	42118.8	16382	0			6699.33	16685718	10672351		0.646587	2.20542	10.7466
38573	10	42198.8	16382	0			6699.33	18323730	8667157		0.646587	2.41017	8.74143
38574	10	42278.8	16382	0			6699.33	15872124	11287388		0.646587	2.10372	11.3617
38575	10	42358.8	16382	0			6699.33	16468615	9168273		0.646587	2.17828	9.24255
38576	10	42438.8	16382	0			6699.33	18013216	12218465		0.646587	2.37136	12.2927
38577	10	42518.8	16382	0			6699.33	19607170	13639010		0.646587	2.5706	13.7133
38578	10	42598.8	16382	0			91805.5	22614752	11259034		2.61005	2.94655	11.3333
38579	10	42678.8	16382	0			58019.9	23190182	11190197		1.83059	3.01848	11.2645
38580	10	42758.8	16382	0			144186	26013514	7.79212e+06		3.81849	3.37139	7.86639
38581	10	42838.8	16382	0			179490	21339110	8350047		4.633	2.78709	8.42432
38582	10	42918.8	16382	0			64208.3	18436294	14753185		1.97336	2.42424	14.8275
38583	10	42998.8	16382	0			6699.33	18314374	9694219		0.646587	2.409	9.7685
38584	10	43078.8	16382	0			6699.33	18840356	11841862		0.646587	2.47475	11.9161
38585	10	43158.8	16382	0			6699.33	17327640	7.58963e+06		0.646587	2.28566	7.6639
38586	10	43238.8	16382	0			6699.33	17839994	9954430		0.646587	2.3497	10.0287
38587	10	43318.8	16382	0			6699.33	16103981	11779798		0.646587	2.1327	11.8541
38588	10	43398.8	16382	0			6699.33	18177014	8605488		0.646587	2.39183	8.67976
38589	10	43478.8	16382	0			6699.33	20255112	7.88527e+06		0.646587	2.65159	7.95954
38590	10	43558.8	16382	0			6699.33	16601150	9260789		0.646587	2.19485	9.33507
38591	10	43638.8	16382	0			6699.33	18276110	6315054		0.646587	2.40422	6.38933
38592	10	43718.8	16382	0			6699.33	17360354	9340426		0.646587	2.28975	9.4147
38593	10	43798.8	16382	0			6699.33	15663293	9228530		0.646587	2.07762	9.30281
38594	10	43878.8	16382	0			6699.33	18736068	5.60843e+06		0.646587	2.46171	5.68271
38595	10	43958.8	16382	0			6699.33	15737491	7885982		0.646587	2.08689	7.96026
38596	10	44038.8	16382	0			6699.33	16696313	5935531		0.646587	2.20674	6.00981
38597	10	44118.8	16382	0			6699.33	18429162	5036690		0.646587	2.42335	5.11097
38598	10	44198.8	16382	0			64570.9	18747752	4622404		1.98173	2.46317	4.69668
38599	10	44278.8	16382	0			6699.33	16421358	6.5795e+06		0.646587	2.17237	6.65378
38600	10	44358.8	16382	0			6699.33	14015378	9513675		0.646587	1.87163	9.58795
38601	10	44438.8	16382	0			6699.33	12772248	11040391		0.646587	1.71623	11.1147
38602	10	44518.8	16382	0			6699.33	12644293	13815180		0.646587	1.70024	13.8895
38603	10	44598.8	16382	0			6699.33	15208057	14513805		0.646587	2.02071	14.5881
38604	10	44678.8	16382	0			117334	18209402	12329145		3.199	2.39588	12.4034
38605	10	44758.8	16382	0			225068	14421685	9502979		5.68451	1.92241	9.57726
38606	10	44838.8	16382	0			207536	10049688	4704544		5.28003	1.37591	4.77882
38607	10	44918.8	16382	0			179949	10272399	967756		4.64357	1.40375	1.04203
38608	10	44998.8	16382	0			197790	9360209	1.21813e+06		5.05519	1.28973	1.29241
38609	10	45078.8	16382	0			239321	9506000	1237332		6.01333	1.30795	1.31161
38610	10	39878.8	16302	0			6699.33	7210.79	6008.07		0.646587	0.120605	0.0802851
38611	10	39958.8	16302	0			39710.5	7210.79	2.07997e+06		1.40818	0.120605	2.15425
38612	10	40038.8	16302	0			182737	6805877	7829320		4.70791	0.970439	7.9036
38613	10	40118.8	16302	0			130015	9919128	11245279		3.49156	1.3596	11.3196
38614	10	40198.8	16302	0			40364.5	8.23476e+06	10337256		1.42327	1.14905	10.4115
38615	10	40278.8	16302	0			90853.8	10331053	12475658		2.58809	1.41109	12.5499
38616	10	40358.8	16302	0			6699.33	10216843	12979974		0.646587	1.39681	13.0543
38617	10	40438.8	16302	0			121294	12744684	14473095		3.29036	1.71279	14.5474
38618	10	40518.8	16302	0			97244.9	11732619	13192006		2.73554	1.58628	13.2663
38619	10	40598.8	16302	0			45317.9	11649275	13669899		1.53755	1.57586	13.7442
38620	10	40678.8	16302	0			62056.5	12687354	15356710		1.92372	1.70562	15.431
38621	10	40758.8	16302	0			49367.9	12364925	14598437		1.63098	1.66532	14.6727
38622	10	40838.8	16302	0			55332.7	13827690	16555344		1.76859	1.84817	16.6296
38623	10	40918.8	16302	0			63197	14468388	15864047		1.95003	1.92825	15.9383
38624	10	40998.8	16302	0			47525	12705635	15353428		1.58847	1.70791	15.4277
38625	10	41078.8	16302	0			47595.5	13469299	15423291		1.59009	1.80337	15.4976
38626	10	41158.8	16302	0			52851.6	14030319	14695238		1.71135	1.87349	14.7695
38627	10	41238.8	16302	0			61913.1	14376783	11589724		1.92041	1.9168	11.664
38628	10	41318.8	16302	0			6699.33	13923344	15665629		0.646587	1.86012	15.7399
38629	10	41398.8	16302	0			6699.33	14658129	11161192		0.646587	1.95197	11.2355
38630	10	41478.8	16302	0			49066.3	14431723	12584555		1.62402	1.92367	12.6588
38631	10	41558.8	16302	0			6699.33	14477178	7575159		0.646587	1.92935	7.64944
38632	10	41638.8	16302	0			6699.33	14461338	7.71308e+06		0.646587	1.92737	7.78736
38633	10	41718.8	16302	0			6699.33	14494757	10402082		0.646587	1.93155	10.4764
38634	10	41798.8	16302	0			6699.33	14864760	9198704		0.646587	1.9778	9.27298
38635	10	41878.8	16302	0			6699.33	15413482	12962198		0.646587	2.04639	13.0365
38636	10	41958.8	16302	0			6699.33	16468444	10574956		0.646587	2.17826	10.6492
38637	10	42038.8	16302	0			6699.33	17503734	12798649		0.646587	2.30767	12.8729
38638	10	42118.8	16302	0			6699.33	17251222	7963417		0.646587	2.27611	8.03769
38639	10	42198.8	16302	0			6699.33	16787272	10719363		0.646587	2.21811	10.7936
38640	10	42278.8	16302	0			6699.33	18722018	8608135		0.646587	2.45996	8.68241
38641	10	42358.8	16302	0			6699.33	16683616	8.32383e+06		0.646587	2.20516	8.39811
38642	10	42438.8	16302	0			6699.33	16947806	11208363		0.646587	2.23818	11.2826
38643	10	42518.8	16302	0			6699.33	18486678	12457266		0.646587	2.43054	12.5315
38644	10	42598.8	16302	0			6699.33	20555106	13447404		0.646587	2.68909	13.5217
38645	10	42678.8	16302	0			151792	24718696	10194380		3.99397	3.20954	10.2687
38646	10	42758.8	16302	0			244355	26686272	4.84485e+06		6.12947	3.45549	4.91913
38647	10	42838.8	16302	0			56632.3	20579636	14320187		1.79858	2.69216	14.3945
38648	10	42918.8	16302	0			6699.33	17633888	13781433		0.646587	2.32394	13.8557
38649	10	42998.8	16302	0			6699.33	18569536	10541832		0.646587	2.4409	10.6161
38650	10	43078.8	16302	0			53991.5	17504254	9719520		1.73765	2.30774	9.7938
38651	10	43158.8	16302	0			6699.33	19258754	8893052		0.646587	2.52705	8.96733
38652	10	43238.8	16302	0			6699.33	19991956	7.62036e+06		0.646587	2.6187	7.69464
38653	10	43318.8	16302	0			6699.33	18222018	8315210		0.646587	2.39746	8.38949
38654	10	43398.8	16302	0			6699.33	18204692	8.02198e+06		0.646587	2.39529	8.09626
38655	10	43478.8	16302	0			6699.33	16733162	10480232		0.646587	2.21135	10.5545
38656	10	43558.8	16302	0			6699.33	18434390	8.31437e+06		0.646587	2.424	8.38865
38657	10	43638.8	16302	0			6699.33	17657216	7304508		0.646587	2.32686	7.37878
38658	10	43718.8	16302	0			6699.33	16517748	8.15639e+06		0.646587	2.18442	8.23067
38659	10	43798.8	16302	0			6699.33	17778296	7928097		0.646587	2.34199	8.00237
38660	10	43878.8	16302	0			62733.7	16501510	8516746		1.93934	2.18239	8.59102
38661	10	43958.8	16302	0			6699.33	17556586	6.54075e+06		0.646587	2.31428	6.61502
38662	10	44038.8	16302	0			6699.33	16148971	8.33313e+06		0.646587	2.13833	8.4074
38663	10	44118.8	16302	0			6699.33	18497754	6149384		0.646587	2.43192	6.22366
38664	10	44198.8	16302	0			6699.33	16787332	7853335		0.646587	2.21812	7.92761
38665	10	44278.8	16302	0			6699.33	18206418	6586994		0.646587	2.39551	6.66127
38666	10	44358.8	16302	0			6699.33	16692852	6.80658e+06		0.646587	2.20631	6.88086
38667	10	44438.8	16302	0			6699.33	17961862	7161901		0.646587	2.36494	7.23618
38668	10	44518.8	16302	0			6699.33	14868292	10136954		0.646587	1.97824	10.2112
38669	10	44598.8	16302	0			6699.33	17173136	10586365		0.646587	2.26635	10.6606
38670	10	44678.8	16302	0			6699.33	17082184	13769439		0.646587	2.25498	13.8437
38671	10	44758.8	16302	0			164027	16322762	13237654		4.27624	2.16005	13.3119
38672	10	44838.8	16302	0			552497	13096811	8931821		13.2385	1.75681	9.0061
38673	10	44918.8	16302	0			146400	8330239	2581831		3.86957	1.16098	2.65611
38674	10	44998.8	16302	0			264753	11467428	1.33053e+06		6.60007	1.55313	1.40481
38675	10	45078.8	16302	0			172479	9468280	1.27275e+06		4.47124	1.30324	1.34703
38676	10	45158.8	16302	0			291116	9616278	1.49813e+06		7.20828	1.32174	1.5724
38677	10	39798.8	16222	0			43794.2	1.10516e+06	6008.07		1.50239	0.257849	0.0802851
38678	10	39878.8	16222	0			73332.6	2.01521e+06	1.16925e+06		2.18386	0.371605	1.24353
38679	10	39958.8	16222	0			99985.4	6.52534e+06	8070168		2.79876	0.935371	8.14444
38680	10	40038.8	16222	0			152931	9941425	12160783		4.02026	1.36238	12.2351
38681	10	40118.8	16222	0			89710.5	12369589	16178712		2.56171	1.6659	16.253
38682	10	40198.8	16222	0			150580	13623882	13737756		3.96603	1.82269	13.812
38683	10	40278.8	16222	0			187664	12832626	11946913		4.82157	1.72378	12.0212
38684	10	40358.8	16222	0			90932.8	12247461	16100397		2.58991	1.65064	16.1747
38685	10	40438.8	16222	0			83103.6	13053674	14909567		2.40929	1.75141	14.9838
38686	10	40518.8	16222	0			59087.2	13383050	16289594		1.85521	1.79259	16.3639
38687	10	40598.8	16222	0			6699.33	13951589	18958440		0.646587	1.86365	19.0327
38688	10	40678.8	16222	0			67669.2	13186841	15945153		2.05321	1.76806	16.0194
38689	10	40758.8	16222	0			87742.6	14286825	14553584		2.51631	1.90556	14.6279
38690	10	40838.8	16222	0			102871	13719106	14089485		2.86534	1.83459	14.1638
38691	10	40918.8	16222	0			86036.1	14660984	16150139		2.47694	1.95233	16.2244
38692	10	40998.8	16222	0			47599.3	14797605	17225366		1.59018	1.9694	17.2996
38693	10	41078.8	16222	0			78997.7	13881966	13992590		2.31456	1.85495	14.0669
38694	10	41158.8	16222	0			96896.4	15154990	11195827		2.7275	2.01408	11.2701
38695	10	41238.8	16222	0			48469.8	14581472	13236254		1.61026	1.94239	13.3105
38696	10	41318.8	16222	0			59965.4	14742512	13063509		1.87547	1.96252	13.1378
38697	10	41398.8	16222	0			6699.33	15629125	9618407		0.646587	2.07334	9.69268
38698	10	41478.8	16222	0			6699.33	15455957	9624582		0.646587	2.0517	9.69886
38699	10	41558.8	16222	0			6699.33	15361311	10284077		0.646587	2.03987	10.3584
38700	10	41638.8	16222	0			6699.33	15459582	12430081		0.646587	2.05215	12.5044
38701	10	41718.8	16222	0			6699.33	15107901	9138812		0.646587	2.00819	9.21309
38702	10	41798.8	16222	0			6699.33	17017254	7413099		0.646587	2.24686	7.48738
38703	10	41878.8	16222	0			6699.33	18868588	8280243		0.646587	2.47828	8.35452
38704	10	41958.8	16222	0			6699.33	17569904	11706821		0.646587	2.31594	11.7811
38705	10	42038.8	16222	0			64838.7	18400294	14053304		1.9879	2.41974	14.1276
38706	10	42118.8	16222	0			6699.33	19659912	10149196		0.646587	2.57719	10.2235
38707	10	42198.8	16222	0			6699.33	17582138	13114743		0.646587	2.31747	13.189
38708	10	42278.8	16222	0			6699.33	19505442	6.81172e+06		0.646587	2.55788	6.886
38709	10	42358.8	16222	0			6699.33	19495424	8528949		0.646587	2.55663	8.60323
38710	10	42438.8	16222	0			6699.33	17064018	11381198		0.646587	2.25271	11.4555
38711	10	42518.8	16222	0			61699.2	16917830	13100204		1.91547	2.23443	13.1745
38712	10	42598.8	16222	0			55414.6	19473266	12444413		1.77048	2.55386	12.5187
38713	10	42678.8	16222	0			162597	23699868	11459106		4.24325	3.08219	11.5334
38714	10	42758.8	16222	0			71143.6	19367222	13648422		2.13336	2.54061	13.7227
38715	10	42838.8	16222	0			6699.33	17823508	15621566		0.646587	2.34764	15.6958
38716	10	42918.8	16222	0			6699.33	18317266	12685612		0.646587	2.40936	12.7599
38717	10	42998.8	16222	0			66577.4	18147790	7.60938e+06		2.02802	2.38818	7.68365
38718	10	43078.8	16222	0			6699.33	19164428	10190672		0.646587	2.51526	10.2649
38719	10	43158.8	16222	0			6699.33	18500248	10272834		0.646587	2.43223	10.3471
38720	10	43238.8	16222	0			6699.33	19694630	6.47256e+06		0.646587	2.58153	6.54684
38721	10	43318.8	16222	0			6699.33	19688266	7.01973e+06		0.646587	2.58074	7.09401
38722	10	43398.8	16222	0			75260.8	19185724	6.30166e+06		2.22835	2.51792	6.37593
38723	10	43478.8	16222	0			6699.33	19222738	6.5202e+06		0.646587	2.52255	6.59448
38724	10	43558.8	16222	0			6699.33	19393282	9239635		0.646587	2.54386	9.31391
38725	10	43638.8	16222	0			6699.33	18271572	6858250		0.646587	2.40365	6.93253
38726	10	43718.8	16222	0			6699.33	17745790	7.50718e+06		0.646587	2.33793	7.58145
38727	10	43798.8	16222	0			6699.33	18859610	8308567		0.646587	2.47716	8.38284
38728	10	43878.8	16222	0			6699.33	16488257	8256829		0.646587	2.18074	8.33111
38729	10	43958.8	16222	0			6699.33	16500243	8.28003e+06		0.646587	2.18223	8.35431
38730	10	44038.8	16222	0			6699.33	16897808	11047544		0.646587	2.23193	11.1218
38731	10	44118.8	16222	0			6699.33	15595304	8244414		0.646587	2.06912	8.31869
38732	10	44198.8	16222	0			6699.33	18507022	4.76767e+06		0.646587	2.43308	4.84195
38733	10	44278.8	16222	0			6699.33	18172324	6025946		0.646587	2.39124	6.10022
38734	10	44358.8	16222	0			6699.33	14928204	6173701		0.646587	1.98573	6.24798
38735	10	44438.8	16222	0			6699.33	19514282	4.39794e+06		0.646587	2.55899	4.47222
38736	10	44518.8	16222	0			6699.33	17928462	7551875		0.646587	2.36076	7.62615
38737	10	44598.8	16222	0			6699.33	15681306	9785618		0.646587	2.07987	9.85989
38738	10	44678.8	16222	0			6699.33	15185247	11282931		0.646587	2.01786	11.3572
38739	10	44758.8	16222	0			151293	16398039	12126440		3.98247	2.16946	12.2007
38740	10	44838.8	16222	0			165457	14043438	12167854		4.30925	1.87513	12.2421
38741	10	44918.8	16222	0			273039	12024665	7141729		6.79123	1.62279	7.21601
38742	10	44998.8	16222	0			122043	8844046	1.35811e+06		3.30765	1.22521	1.43238
38743	10	45078.8	16222	0			167112	10899713	1.28562e+06		4.34742	1.48217	1.35989
38744	10	45158.8	16222	0			238498	10512674	1.07067e+06		5.99435	1.43379	1.14495
38745	10	45238.8	16222	0			89957.5	6866635	893946		2.56741	0.978033	0.968222
38746	10	39798.8	16142	0			86217.6	2440826	1.20173e+06		2.48113	0.424807	1.276
38747	10	39878.8	16142	0			80091.3	5402929	6654675		2.33979	0.79507	6.72895
38748	10	39958.8	16142	0			60313.2	9981820	12780247		1.8835	1.36743	12.8545
38749	10	40038.8	16142	0			42686.7	10285814	13127925		1.47684	1.40543	13.2022
38750	10	40118.8	16142	0			45534.2	11571617	15166210		1.54254	1.56616	15.2405
38751	10	40198.8	16142	0			130394	13193737	15241684		3.50031	1.76892	15.316
38752	10	40278.8	16142	0			58681.7	12879151	14649444		1.84586	1.7296	14.7237
38753	10	40358.8	16142	0			82050.6	12279157	14789854		2.385	1.6546	14.8641
38754	10	40438.8	16142	0			66228.1	12465313	15103412		2.01996	1.67787	15.1777
38755	10	40518.8	16142	0			43377.3	13026233	14010204		1.49277	1.74798	14.0845
38756	10	40598.8	16142	0			60814.9	12778075	13697884		1.89507	1.71696	13.7722
38757	10	40678.8	16142	0			81020.3	13899307	13724847		2.36122	1.85712	13.7991
38758	10	40758.8	16142	0			61523.1	12182869	12340487		1.91141	1.64256	12.4148
38759	10	40838.8	16142	0			6699.33	12990423	10153795		0.646587	1.74351	10.2281
38760	10	40918.8	16142	0			57637.4	13344305	12890279		1.82176	1.78774	12.9646
38761	10	40998.8	16142	0			52889.2	14837319	17366192		1.71222	1.97437	17.4405
38762	10	41078.8	16142	0			67210.2	14752515	13487719		2.04262	1.96377	13.562
38763	10	41158.8	16142	0			56412.1	12877556	11763698		1.7935	1.7294	11.838
38764	10	41238.8	16142	0			70014.7	14272673	10103723		2.10732	1.90379	10.178
38765	10	41318.8	16142	0			115734	16923284	7032316		3.16209	2.23511	7.10659
38766	10	41398.8	16142	0			6699.33	13845742	9806247		0.646587	1.85042	9.88052
38767	10	41478.8	16142	0			70744.7	15063685	10717433		2.12416	2.00266	10.7917
38768	10	41558.8	16142	0			75364.4	16775470	7818359		2.23074	2.21664	7.89264
38769	10	41638.8	16142	0			6699.33	14561203	10441474		0.646587	1.93985	10.5158
38770	10	41718.8	16142	0			6699.33	15071333	9125881		0.646587	2.00362	9.20016
38771	10	41798.8	16142	0			6699.33	15426194	9323052		0.646587	2.04798	9.39733
38772	10	41878.8	16142	0			6699.33	15218260	11047999		0.646587	2.02199	11.1223
38773	10	41958.8	16142	0			6699.33	18645728	12317087		0.646587	2.45042	12.3914
38774	10	42038.8	16142	0			6699.33	16969778	9507800		0.646587	2.24093	9.58208
38775	10	42118.8	16142	0			6699.33	18092698	10600351		0.646587	2.38129	10.6746
38776	10	42198.8	16142	0			6699.33	20129126	9707496		0.646587	2.63584	9.78177
38777	10	42278.8	16142	0			6699.33	18728776	9627221		0.646587	2.4608	9.7015
38778	10	42358.8	16142	0			6699.33	18806754	9659902		0.646587	2.47055	9.73418
38779	10	42438.8	16142	0			74898.2	19605106	12130995		2.21998	2.57034	12.2053
38780	10	42518.8	16142	0			6699.33	16486575	8829559		0.646587	2.18053	8.90384
38781	10	42598.8	16142	0			62404	16923964	9786234		1.93173	2.2352	9.86051
38782	10	42678.8	16142	0			45679.7	17604390	12448427		1.54589	2.32025	12.5227
38783	10	42758.8	16142	0			43356.8	17315226	13301366		1.4923	2.28411	13.3756
38784	10	42838.8	16142	0			6699.33	18682292	10180840		0.646587	2.45499	10.2551
38785	10	42918.8	16142	0			6699.33	19640716	9399488		0.646587	2.57479	9.47377
38786	10	42998.8	16142	0			6699.33	17538314	10946976		0.646587	2.31199	11.0213
38787	10	43078.8	16142	0			6699.33	20309840	11387156		0.646587	2.65843	11.4614
38788	10	43158.8	16142	0			6699.33	17371982	10681628		0.646587	2.2912	10.7559
38789	10	43238.8	16142	0			6699.33	19607270	6.17539e+06		0.646587	2.57061	6.24967
38790	10	43318.8	16142	0			6699.33	18370360	11023629		0.646587	2.416	11.0979
38791	10	43398.8	16142	0			6699.33	19513778	7.03506e+06		0.646587	2.55893	7.10934
38792	10	43478.8	16142	0			6699.33	17828274	10813697		0.646587	2.34824	10.888
38793	10	43558.8	16142	0			6699.33	18136042	8482791		0.646587	2.38671	8.55707
38794	10	43638.8	16142	0			6699.33	17438842	8824007		0.646587	2.29956	8.89828
38795	10	43718.8	16142	0			6699.33	16882288	7366026		0.646587	2.22999	7.4403
38796	10	43798.8	16142	0			6699.33	17067738	8558290		0.646587	2.25317	8.63257
38797	10	43878.8	16142	0			6699.33	17462072	7.75703e+06		0.646587	2.30246	7.8313
38798	10	43958.8	16142	0			6699.33	16762304	8304660		0.646587	2.21499	8.37894
38799	10	44038.8	16142	0			6699.33	16786940	10013092		0.646587	2.21807	10.0874
38800	10	44118.8	16142	0			6699.33	17560726	7286737		0.646587	2.31479	7.36101
38801	10	44198.8	16142	0			6699.33	16549389	7.76217e+06		0.646587	2.18838	7.83645
38802	10	44278.8	16142	0			6699.33	16535127	8279698		0.646587	2.18659	8.35398
38803	10	44358.8	16142	0			6699.33	17090010	6.50606e+06		0.646587	2.25596	6.58034
38804	10	44438.8	16142	0			6699.33	18166378	5.12554e+06		0.646587	2.3905	5.19982
38805	10	44518.8	16142	0			6699.33	18029932	6.96703e+06		0.646587	2.37345	7.04131
38806	10	44598.8	16142	0			6699.33	16722013	8795233		0.646587	2.20996	8.86951
38807	10	44678.8	16142	0			6699.33	14794664	11328139		0.646587	1.96904	11.4024
38808	10	44758.8	16142	0			49805.4	15238467	12064478		1.64107	2.02451	12.1388
38809	10	44838.8	16142	0			6699.33	14804649	15442825		0.646587	1.97029	15.5171
38810	10	44918.8	16142	0			260920	13982566	13177802		6.51165	1.86752	13.2521
38811	10	44998.8	16142	0			187532	11644452	6.96046e+06		4.81852	1.57526	7.03474
38812	10	45078.8	16142	0			237473	10541474	1.24181e+06		5.97071	1.43739	1.31609
38813	10	45158.8	16142	0			219477	10204325	1.36391e+06		5.55552	1.39524	1.43819
38814	10	45238.8	16142	0			206595	8667959	1024944		5.25832	1.2032	1.09922
38815	10	39718.8	16062	0			207291	3.47839e+06	1.94047e+06		5.27438	0.554503	2.01475
38816	10	39798.8	16062	0			242660	8.10444e+06	8422080		6.09036	1.13276	8.49636
38817	10	39878.8	16062	0			73566.7	10475489	14950298		2.18927	1.42914	15.0246
38818	10	39958.8	16062	0			79421.1	12537801	16512759		2.32433	1.68693	16.587
38819	10	40038.8	16062	0			79081.7	12007605	16142109		2.3165	1.62065	16.2164
38820	10	40118.8	16062	0			79662.5	13719794	16662686		2.3299	1.83468	16.737
38821	10	40198.8	16062	0			106895	14006662	15594799		2.95816	1.87054	15.6691
38822	10	40278.8	16062	0			69083.5	13906437	17582696		2.08583	1.85801	17.657
38823	10	40358.8	16062	0			113987	12924399	13922063		3.1218	1.73525	13.9963
38824	10	40438.8	16062	0			71669.3	13472026	15309863		2.14549	1.80371	15.3841
38825	10	40518.8	16062	0			73356.4	13633728	13571978		2.18441	1.82392	13.6463
38826	10	40598.8	16062	0			86221.3	14026770	14461037		2.48122	1.87305	14.5353
38827	10	40678.8	16062	0			56740.3	13498998	14579273		1.80107	1.80708	14.6535
38828	10	40758.8	16062	0			122257	13825312	12883326		3.31258	1.84787	12.9576
38829	10	40838.8	16062	0			54580.5	13502421	14679152		1.75124	1.80751	14.7534
38830	10	40918.8	16062	0			51596.5	13754010	15735024		1.6824	1.83896	15.8093
38831	10	40998.8	16062	0			65696	13936548	15253059		2.00768	1.86177	15.3273
38832	10	41078.8	16062	0			94578.3	15314314	14406783		2.67402	2.03399	14.4811
38833	10	41158.8	16062	0			58614.7	15372970	11305475		1.84431	2.04133	11.3798
38834	10	41238.8	16062	0			6699.33	14372879	13879311		0.646587	1.91631	13.9536
38835	10	41318.8	16062	0			67412.3	15338618	11550702		2.04728	2.03703	11.625
38836	10	41398.8	16062	0			6699.33	16360797	9085781		0.646587	2.1648	9.16006
38837	10	41478.8	16062	0			6699.33	15828846	11738492		0.646587	2.09831	11.8128
38838	10	41558.8	16062	0			6699.33	16703270	10136090		0.646587	2.20761	10.2104
38839	10	41638.8	16062	0			6699.33	16840770	6865610		0.646587	2.2248	6.93989
38840	10	41718.8	16062	0			6699.33	15928392	13588090		0.646587	2.11075	13.6624
38841	10	41798.8	16062	0			6699.33	16333945	12863030		0.646587	2.16145	12.9373
38842	10	41878.8	16062	0			6699.33	16521013	9885214		0.646587	2.18483	9.95949
38843	10	41958.8	16062	0			6699.33	17829420	12056515		0.646587	2.34838	12.1308
38844	10	42038.8	16062	0			6699.33	19239014	9732994		0.646587	2.52458	9.80727
38845	10	42118.8	16062	0			6699.33	18394306	9561105		0.646587	2.41899	9.63538
38846	10	42198.8	16062	0			6699.33	20322212	9217642		0.646587	2.65998	9.29192
38847	10	42278.8	16062	0			6699.33	19047336	10590708		0.646587	2.50062	10.665
38848	10	42358.8	16062	0			6699.33	18742916	10436483		0.646587	2.46257	10.5108
38849	10	42438.8	16062	0			6699.33	19173156	9897828		0.646587	2.51635	9.97211
38850	10	42518.8	16062	0			6699.33	18219684	10487730		0.646587	2.39716	10.562
38851	10	42598.8	16062	0			6699.33	18146916	10723158		0.646587	2.38807	10.7974
38852	10	42678.8	16062	0			45400.3	18140868	13005248		1.53945	2.38731	13.0795
38853	10	42758.8	16062	0			51850.7	17889772	12958077		1.68826	2.35593	13.0324
38854	10	42838.8	16062	0			6699.33	19578206	9657905		0.646587	2.56698	9.73218
38855	10	42918.8	16062	0			6699.33	20161504	12759353		0.646587	2.63989	12.8336
38856	10	42998.8	16062	0			6699.33	18838690	10588372		0.646587	2.47454	10.6626
38857	10	43078.8	16062	0			6699.33	20977540	7253901		0.646587	2.7419	7.32818
38858	10	43158.8	16062	0			6699.33	18384552	7.14641e+06		0.646587	2.41777	7.22068
38859	10	43238.8	16062	0			6699.33	19437396	7850713		0.646587	2.54938	7.92499
38860	10	43318.8	16062	0			6699.33	19312066	7931552		0.646587	2.53371	8.00583
38861	10	43398.8	16062	0			6699.33	18355074	9076133		0.646587	2.41409	9.15041
38862	10	43478.8	16062	0			6699.33	18317742	10046840		0.646587	2.40942	10.1211
38863	10	43558.8	16062	0			6699.33	18128144	10513094		0.646587	2.38572	10.5874
38864	10	43638.8	16062	0			6699.33	16542945	9812991		0.646587	2.18757	9.88727
38865	10	43718.8	16062	0			6699.33	17637496	6.09914e+06		0.646587	2.32439	6.17342
38866	10	43798.8	16062	0			6699.33	16757617	8496867		0.646587	2.21441	8.57114
38867	10	43878.8	16062	0			6699.33	15558994	9523855		0.646587	2.06458	9.59813
38868	10	43958.8	16062	0			6699.33	16986188	9187792		0.646587	2.24298	9.26207
38869	10	44038.8	16062	0			6699.33	15533859	7.35262e+06		0.646587	2.06144	7.42689
38870	10	44118.8	16062	0			6699.33	16299213	7270631		0.646587	2.15711	7.34491
38871	10	44198.8	16062	0			6699.33	17263084	6.50844e+06		0.646587	2.27759	6.58271
38872	10	44278.8	16062	0			6699.33	15875839	9718835		0.646587	2.10418	9.79311
38873	10	44358.8	16062	0			6699.33	17389742	5.04746e+06		0.646587	2.29342	5.12174
38874	10	44438.8	16062	0			6699.33	17861294	4944138		0.646587	2.35237	5.01842
38875	10	44518.8	16062	0			6699.33	18030712	5.85521e+06		0.646587	2.37354	5.92949
38876	10	44598.8	16062	0			6699.33	16255712	6218079		0.646587	2.15167	6.29236
38877	10	44678.8	16062	0			6699.33	16687731	7114890		0.646587	2.20567	7.18917
38878	10	44758.8	16062	0			6699.33	14100915	9083553		0.646587	1.88232	9.15783
38879	10	44838.8	16062	0			6699.33	12820538	13086353		0.646587	1.72227	13.1606
38880	10	44918.8	16062	0			335766	15461180	11802249		8.23838	2.05235	11.8765
38881	10	44998.8	16062	0			518102	12885256	8939919		12.445	1.73036	9.0142
38882	10	45078.8	16062	0			184408	8702350	1.49895e+06		4.74646	1.2075	1.57322
38883	10	45158.8	16062	0			190325	10186579	918875		4.88296	1.39303	0.993152
38884	10	45238.8	16062	0			292158	10560959	867927		7.23232	1.43982	0.942204
38885	10	45318.8	16062	0			264918	9556342	1.29975e+06		6.60387	1.31425	1.37402
38886	10	39638.8	15982	0			91684.8	3.52817e+06	2.01131e+06		2.60726	0.560725	2.08559
38887	10	39718.8	15982	0			110732	6.82447e+06	8767014		3.04669	0.972763	8.84129
38888	10	39798.8	15982	0			44688.9	12051544	14999586		1.52303	1.62615	15.0739
38889	10	39878.8	15982	0			6699.33	12599747	19715696		0.646587	1.69467	19.79
38890	10	39958.8	15982	0			54555.3	11857622	15579066		1.75066	1.60191	15.6533
38891	10	40038.8	15982	0			96421.3	13329513	16276899		2.71654	1.78589	16.3512
38892	10	40118.8	15982	0			71301.9	13725540	17402748		2.13701	1.8354	17.477
38893	10	40198.8	15982	0			63350.5	12525485	14497081		1.95357	1.68539	14.5714
38894	10	40278.8	15982	0			74230.1	12669003	12712911		2.20457	1.70333	12.7872
38895	10	40358.8	15982	0			46485.5	11550211	13770625		1.56448	1.56348	13.8449
38896	10	40438.8	15982	0			6699.33	12788064	13874845		0.646587	1.71821	13.9491
38897	10	40518.8	15982	0			64313.6	12203471	11393738		1.97579	1.64514	11.468
38898	10	40598.8	15982	0			49496	12851902	16053901		1.63394	1.72619	16.1282
38899	10	40678.8	15982	0			55727.1	13838295	13597632		1.77769	1.84949	13.6719
38900	10	40758.8	15982	0			6699.33	13280630	10139119		0.646587	1.77978	10.2134
38901	10	40838.8	15982	0			6699.33	12388797	13203605		0.646587	1.6683	13.2779
38902	10	40918.8	15982	0			72976.8	16156393	12924251		2.17566	2.13925	12.9985
38903	10	40998.8	15982	0			60844.3	14503166	15733679		1.89575	1.9326	15.808
38904	10	41078.8	15982	0			55575.1	14527024	14946598		1.77419	1.93558	15.0209
38905	10	41158.8	15982	0			6699.33	13936659	12149151		0.646587	1.86179	12.2234
38906	10	41238.8	15982	0			50708.8	14337528	13102758		1.66192	1.91189	13.177
38907	10	41318.8	15982	0			69104.9	15628766	8641588		2.08633	2.0733	8.71587
38908	10	41398.8	15982	0			6699.33	16642057	12611053		0.646587	2.19996	12.6853
38909	10	41478.8	15982	0			6699.33	14415507	11090602		0.646587	1.92164	11.1649
38910	10	41558.8	15982	0			6699.33	15538489	8.27239e+06		0.646587	2.06202	8.34667
38911	10	41638.8	15982	0			6699.33	15705436	9026285		0.646587	2.08288	9.10056
38912	10	41718.8	15982	0			6699.33	17364102	9564267		0.646587	2.29022	9.63854
38913	10	41798.8	15982	0			85284	16593376	9209191		2.45959	2.19388	9.28347
38914	10	41878.8	15982	0			6699.33	16263538	10641234		0.646587	2.15265	10.7155
38915	10	41958.8	15982	0			6699.33	17885266	13980734		0.646587	2.35536	14.055
38916	10	42038.8	15982	0			6699.33	19693368	9601646		0.646587	2.58137	9.67592
38917	10	42118.8	15982	0			6699.33	18816424	8860710		0.646587	2.47176	8.93499
38918	10	42198.8	15982	0			6699.33	19425336	10861978		0.646587	2.54787	10.9363
38919	10	42278.8	15982	0			57981.2	18407422	10688913		1.8297	2.42063	10.7632
38920	10	42358.8	15982	0			6699.33	18676542	9905702		0.646587	2.45427	9.97998
38921	10	42438.8	15982	0			6699.33	19201480	12284538		0.646587	2.51989	12.3588
38922	10	42518.8	15982	0			6699.33	21492124	7625994		0.646587	2.80622	7.70027
38923	10	42598.8	15982	0			6699.33	17840644	10524828		0.646587	2.34978	10.5991
38924	10	42678.8	15982	0			58983.5	18161482	12503969		1.85282	2.38989	12.5782
38925	10	42758.8	15982	0			6699.33	19413958	7680072		0.646587	2.54645	7.75435
38926	10	42838.8	15982	0			6699.33	18537106	11589941		0.646587	2.43684	11.6642
38927	10	42918.8	15982	0			6699.33	19905504	10786733		0.646587	2.60789	10.861
38928	10	42998.8	15982	0			6699.33	20698802	9326279		0.646587	2.70705	9.40056
38929	10	43078.8	15982	0			6699.33	18241414	7929969		0.646587	2.39988	8.00425
38930	10	43158.8	15982	0			6699.33	20430536	7930087		0.646587	2.67352	8.00436
38931	10	43238.8	15982	0			6699.33	18901288	8.29762e+06		0.646587	2.48237	8.3719
38932	10	43318.8	15982	0			6699.33	20013146	6.78384e+06		0.646587	2.62135	6.85811
38933	10	43398.8	15982	0			6699.33	18914784	6.43005e+06		0.646587	2.48405	6.50432
38934	10	43478.8	15982	0			6699.33	16489288	7.13371e+06		0.646587	2.18086	7.20799
38935	10	43558.8	15982	0			6699.33	18761856	6096012		0.646587	2.46494	6.17029
38936	10	43638.8	15982	0			6699.33	17501216	7574377		0.646587	2.30736	7.64865
38937	10	43718.8	15982	0			6699.33	16656519	8953470		0.646587	2.20177	9.02775
38938	10	43798.8	15982	0			6699.33	16990914	9841511		0.646587	2.24357	9.91579
38939	10	43878.8	15982	0			6699.33	16072138	8647771		0.646587	2.12872	8.72205
38940	10	43958.8	15982	0			6699.33	15254792	8099897		0.646587	2.02655	8.17417
38941	10	44038.8	15982	0			6699.33	15906945	7.23025e+06		0.646587	2.10807	7.30453
38942	10	44118.8	15982	0			6699.33	16982436	9641519		0.646587	2.24251	9.7158
38943	10	44198.8	15982	0			6699.33	16407791	9814944		0.646587	2.17068	9.88922
38944	10	44278.8	15982	0			6699.33	18642980	7160570		0.646587	2.45008	7.23485
38945	10	44358.8	15982	0			6699.33	19785324	6.58443e+06		0.646587	2.59287	6.65871
38946	10	44438.8	15982	0			6699.33	17136362	6316351		0.646587	2.26175	6.39063
38947	10	44518.8	15982	0			6699.33	19217864	4620538		0.646587	2.52194	4.69482
38948	10	44598.8	15982	0			6699.33	19418666	5.72576e+06		0.646587	2.54704	5.80004
38949	10	44678.8	15982	0			6699.33	18296310	4.14828e+06		0.646587	2.40674	4.22256
38950	10	44758.8	15982	0			6699.33	14776303	6.68362e+06		0.646587	1.96674	6.75789
38951	10	44838.8	15982	0			56535.7	14050184	10643021		1.79635	1.87598	10.7173
38952	10	44918.8	15982	0			6699.33	15079671	14814747		0.646587	2.00466	14.889
38953	10	44998.8	15982	0			174448	15162470	13714205		4.51666	2.01501	13.7885
38954	10	45078.8	15982	0			239319	10772181	5683466		6.01328	1.46623	5.75774
38955	10	45158.8	15982	0			281654	10763362	788109		6.98999	1.46512	0.862386
38956	10	45238.8	15982	0			150064	8423872	757864		3.9541	1.17269	0.832141
38957	10	45318.8	15982	0			225246	8490526	828183		5.68862	1.18102	0.90246
38958	10	45398.8	15982	0			189470	6779782	810096		4.86323	0.967177	0.884373
38959	10	39558.8	15902	0			170613	6.80516e+06	4.09366e+06		4.4282	0.970349	4.16793
38960	10	39638.8	15902	0			122389	9679759	10943621		3.31562	1.32967	11.0179
38961	10	39718.8	15902	0			53033.9	10316926	15871692		1.71556	1.40932	15.946
38962	10	39798.8	15902	0			86027.9	13206698	18533108		2.47675	1.77054	18.6074
38963	10	39878.8	15902	0			6699.33	13363844	17555218		0.646587	1.79018	17.6295
38964	10	39958.8	15902	0			6699.33	13776698	20195040		0.646587	1.84179	20.2693
38965	10	40038.8	15902	0			87455.9	14202501	15243518		2.5097	1.89502	15.3178
38966	10	40118.8	15902	0			59247.5	13009133	17992538		1.85891	1.74585	18.0668
38967	10	40198.8	15902	0			6699.33	12823985	16376155		0.646587	1.7227	16.4504
38968	10	40278.8	15902	0			6699.33	12703914	17414304		0.646587	1.70769	17.4886
38969	10	40358.8	15902	0			100868	13434592	15253433		2.81913	1.79903	15.3277
38970	10	40438.8	15902	0			79183.1	13361749	13559069		2.31884	1.78992	13.6333
38971	10	40518.8	15902	0			47918	12943425	15155679		1.59753	1.73763	15.23
38972	10	40598.8	15902	0			78487.5	13384104	12811594		2.30279	1.79272	12.8859
38973	10	40678.8	15902	0			49779.6	14183186	11976180		1.64048	1.8926	12.0505
38974	10	40758.8	15902	0			6699.33	12843709	10552879		0.646587	1.72517	10.6272
38975	10	40838.8	15902	0			6699.33	12772819	12309038		0.646587	1.71631	12.3833
38976	10	40918.8	15902	0			59623.6	14504686	13191901		1.86759	1.93279	13.2662
38977	10	40998.8	15902	0			6699.33	15036545	9248232		0.646587	1.99927	9.32251
38978	10	41078.8	15902	0			63920.8	13946792	9566028		1.96673	1.86305	9.6403
38979	10	41158.8	15902	0			6699.33	14242916	11808782		0.646587	1.90007	11.8831
38980	10	41238.8	15902	0			6699.33	16548760	11743900		0.646587	2.1883	11.8182
38981	10	41318.8	15902	0			6699.33	14804263	11743668		0.646587	1.97024	11.8179
38982	10	41398.8	15902	0			6699.33	14473517	10342300		0.646587	1.92889	10.4166
38983	10	41478.8	15902	0			6699.33	15045578	13534570		0.646587	2.0004	13.6088
38984	10	41558.8	15902	0			6699.33	16542932	9403426		0.646587	2.18757	9.4777
38985	10	41638.8	15902	0			6699.33	15555315	10852202		0.646587	2.06412	10.9265
38986	10	41718.8	15902	0			6699.33	16828402	9143121		0.646587	2.22325	9.2174
38987	10	41798.8	15902	0			6699.33	15785132	9557910		0.646587	2.09285	9.63219
38988	10	41878.8	15902	0			66768.5	16829244	5.78429e+06		2.03243	2.22336	5.85857
38989	10	41958.8	15902	0			6699.33	16528723	11992419		0.646587	2.18579	12.0667
38990	10	42038.8	15902	0			88443.6	19641282	7692866		2.53249	2.57486	7.76714
38991	10	42118.8	15902	0			6699.33	19047542	8641456		0.646587	2.50065	8.71573
38992	10	42198.8	15902	0			6699.33	18455706	8051683		0.646587	2.42667	8.12596
38993	10	42278.8	15902	0			6699.33	19774452	8.1931e+06		0.646587	2.59151	8.26738
38994	10	42358.8	15902	0			6699.33	18713368	10599139		0.646587	2.45887	10.6734
38995	10	42438.8	15902	0			6699.33	17940736	10457724		0.646587	2.3623	10.532
38996	10	42518.8	15902	0			6699.33	18882872	8645682		0.646587	2.48006	8.71996
38997	10	42598.8	15902	0			6699.33	17000786	11213961		0.646587	2.2448	11.2882
38998	10	42678.8	15902	0			6699.33	17973900	8876831		0.646587	2.36644	8.95111
38999	10	42758.8	15902	0			6699.33	17525766	7.59084e+06		0.646587	2.31042	7.66511
39000	10	42838.8	15902	0			6699.33	19643936	8687645		0.646587	2.5752	8.76192
39001	10	42918.8	15902	0			6699.33	20214228	7.91115e+06		0.646587	2.64648	7.98543
39002	10	42998.8	15902	0			6699.33	19262330	8409458		0.646587	2.5275	8.48373
39003	10	43078.8	15902	0			6699.33	18552628	11987345		0.646587	2.43878	12.0616
39004	10	43158.8	15902	0			6699.33	19118936	8.34318e+06		0.646587	2.50957	8.41745
39005	10	43238.8	15902	0			6699.33	17171232	11520242		0.646587	2.26611	11.5945
39006	10	43318.8	15902	0			6699.33	19500388	9250586		0.646587	2.55725	9.32486
39007	10	43398.8	15902	0			6699.33	18045374	7.08549e+06		0.646587	2.37538	7.15977
39008	10	43478.8	15902	0			6699.33	17870986	5020978		0.646587	2.35358	5.09525
39009	10	43558.8	15902	0			6699.33	17467490	8418344		0.646587	2.30314	8.49262
39010	10	43638.8	15902	0			6699.33	16521678	9610534		0.646587	2.18491	9.68481
39011	10	43718.8	15902	0			6699.33	15657720	10058759		0.646587	2.07692	10.133
39012	10	43798.8	15902	0			6699.33	16904288	9138879		0.646587	2.23274	9.21316
39013	10	43878.8	15902	0			6699.33	14760546	9366283		0.646587	1.96477	9.44056
39014	10	43958.8	15902	0			6699.33	16267885	6116902		0.646587	2.15319	6.19118
39015	10	44038.8	15902	0			56908.3	15596697	7.76476e+06		1.80494	2.06929	7.83904
39016	10	44118.8	15902	0			6699.33	16286814	8.34363e+06		0.646587	2.15556	8.41791
39017	10	44198.8	15902	0			6699.33	15805469	7.07696e+06		0.646587	2.09539	7.15124
39018	10	44278.8	15902	0			6699.33	16805582	6636246		0.646587	2.2204	6.71052
39019	10	44358.8	15902	0			6699.33	17128812	7995690		0.646587	2.26081	8.06997
39020	10	44438.8	15902	0			6699.33	18277858	4.51037e+06		0.646587	2.40444	4.58465
39021	10	44518.8	15902	0			6699.33	17833802	4.32147e+06		0.646587	2.34893	4.39574
39022	10	44598.8	15902	0			6699.33	18160414	5.65286e+06		0.646587	2.38976	5.72714
39023	10	44678.8	15902	0			6699.33	18483202	5070446		0.646587	2.4301	5.14472
39024	10	44758.8	15902	0			6699.33	15673871	5.79631e+06		0.646587	2.07894	5.87059
39025	10	44838.8	15902	0			6699.33	14584916	8268905		0.646587	1.94282	8.34318
39026	10	44918.8	15902	0			6699.33	14558256	15232339		0.646587	1.93949	15.3066
39027	10	44998.8	15902	0			258834	13603706	12049309		6.46352	1.82017	12.1236
39028	10	45078.8	15902	0			643155	13354624	9053610		15.3301	1.78903	9.12789
39029	10	45158.8	15902	0			294090	9290731	1.76923e+06		7.27689	1.28105	1.84351
39030	10	45238.8	15902	0			349252	11858209	948502		8.54952	1.60198	1.02278
39031	10	45318.8	15902	0			152852	8768848	1005068		4.01843	1.21581	1.07934
39032	10	45398.8	15902	0			180339	8710395	1.10854e+06		4.65258	1.2085	1.18281
39033	10	39558.8	15822	0			99180.7	10349866	13751688		2.7802	1.41344	13.826
39034	10	39638.8	15822	0			100038	13480509	15105103		2.79997	1.80477	15.1794
39035	10	39718.8	15822	0			42110.6	12436465	16058640		1.46355	1.67426	16.1329
39036	10	39798.8	15822	0			58456.7	12175463	17957726		1.84067	1.64164	18.032
39037	10	39878.8	15822	0			6699.33	13321568	17332644		0.646587	1.7849	17.4069
39038	10	39958.8	15822	0			6699.33	12541750	15664606		0.646587	1.68742	15.7389
39039	10	40038.8	15822	0			6699.33	11615735	16170875		0.646587	1.57167	16.2452
39040	10	40118.8	15822	0			61133.4	13243489	13893063		1.90242	1.77514	13.9673
39041	10	40198.8	15822	0			74003.5	13552319	16182164		2.19934	1.81374	16.2564
39042	10	40278.8	15822	0			52285.8	14187841	17386428		1.6983	1.89318	17.4607
39043	10	40358.8	15822	0			6699.33	13017476	11196987		0.646587	1.74689	11.2713
39044	10	40438.8	15822	0			51020	13417244	14551295		1.6691	1.79686	14.6256
39045	10	40518.8	15822	0			64106.9	13653897	12271220		1.97102	1.82644	12.3455
39046	10	40598.8	15822	0			60569.8	14612898	12577784		1.88942	1.94632	12.6521
39047	10	40678.8	15822	0			6699.33	13675025	12799005		0.646587	1.82908	12.8733
39048	10	40758.8	15822	0			6699.33	13797759	12959006		0.646587	1.84442	13.0333
39049	10	40838.8	15822	0			6699.33	14819707	10686587		0.646587	1.97217	10.7609
39050	10	40918.8	15822	0			63351.1	14589680	11882790		1.95358	1.94341	11.9571
39051	10	40998.8	15822	0			6699.33	14822032	9277598		0.646587	1.97246	9.35187
39052	10	41078.8	15822	0			6699.33	14312678	8682164		0.646587	1.90879	8.75644
39053	10	41158.8	15822	0			6699.33	14442464	10067622		0.646587	1.92501	10.1419
39054	10	41238.8	15822	0			53627.8	15281693	12535807		1.72926	2.02992	12.6101
39055	10	41318.8	15822	0			6699.33	15263096	11974194		0.646587	2.02759	12.0485
39056	10	41398.8	15822	0			6699.33	15682158	12959047		0.646587	2.07997	13.0333
39057	10	41478.8	15822	0			6699.33	17278598	9701021		0.646587	2.27953	9.7753
39058	10	41558.8	15822	0			6699.33	16964370	11978017		0.646587	2.24025	12.0523
39059	10	41638.8	15822	0			6699.33	18357726	8235180		0.646587	2.41442	8.30946
39060	10	41718.8	15822	0			6699.33	16981386	11096086		0.646587	2.24238	11.1704
39061	10	41798.8	15822	0			81662.9	17552384	8.33604e+06		2.37605	2.31375	8.41032
39062	10	41878.8	15822	0			6699.33	18095966	8917997		0.646587	2.3817	8.99227
39063	10	41958.8	15822	0			6699.33	18845434	7.98591e+06		0.646587	2.47538	8.06019
39064	10	42038.8	15822	0			6699.33	18008716	11138479		0.646587	2.37079	11.2128
39065	10	42118.8	15822	0			6699.33	18767814	10074836		0.646587	2.46568	10.1491
39066	10	42198.8	15822	0			67811.8	21202180	8590075		2.05649	2.76998	8.66435
39067	10	42278.8	15822	0			6699.33	19961886	9934405		0.646587	2.61494	10.0087
39068	10	42358.8	15822	0			6699.33	20706378	8376485		0.646587	2.708	8.45076
39069	10	42438.8	15822	0			6699.33	20825504	8395060		0.646587	2.72289	8.46934
39070	10	42518.8	15822	0			6699.33	19192060	12120784		0.646587	2.51871	12.1951
39071	10	42598.8	15822	0			6699.33	18749264	10327986		0.646587	2.46336	10.4023
39072	10	42678.8	15822	0			6699.33	19396158	8662158		0.646587	2.54422	8.73644
39073	10	42758.8	15822	0			6699.33	18386984	7.2784e+06		0.646587	2.41808	7.35267
39074	10	42838.8	15822	0			6699.33	19861648	11677948		0.646587	2.60241	11.7522
39075	10	42918.8	15822	0			6699.33	20298686	8229646		0.646587	2.65704	8.30392
39076	10	42998.8	15822	0			6699.33	20484696	9260992		0.646587	2.68029	9.33527
39077	10	43078.8	15822	0			6699.33	18951686	9952116		0.646587	2.48866	10.0264
39078	10	43158.8	15822	0			6699.33	20085170	8.00425e+06		0.646587	2.63035	8.07852
39079	10	43238.8	15822	0			6699.33	17324522	9054643		0.646587	2.28527	9.12892
39080	10	43318.8	15822	0			6699.33	16553405	4997413		0.646587	2.18888	5.07169
39081	10	43398.8	15822	0			6699.33	16740533	6.84187e+06		0.646587	2.21227	6.91615
39082	10	43478.8	15822	0			6699.33	17568430	8763117		0.646587	2.31576	8.83739
39083	10	43558.8	15822	0			6699.33	17514448	10828711		0.646587	2.30901	10.903
39084	10	43638.8	15822	0			6699.33	17210054	7968855		0.646587	2.27096	8.04313
39085	10	43718.8	15822	0			6699.33	16170330	8795249		0.646587	2.141	8.86953
39086	10	43798.8	15822	0			6699.33	16584835	7174873		0.646587	2.19281	7.24915
39087	10	43878.8	15822	0			6699.33	17113532	5473691		0.646587	2.2589	5.54797
39088	10	43958.8	15822	0			6699.33	16229190	4208541		0.646587	2.14835	4.28282
39089	10	44038.8	15822	0			6699.33	15877455	5905533		0.646587	2.10439	5.97981
39090	10	44118.8	15822	0			6699.33	16908370	9311179		0.646587	2.23325	9.38546
39091	10	44198.8	15822	0			6699.33	14750159	10331519		0.646587	1.96347	10.4058
39092	10	44278.8	15822	0			6699.33	17365934	6704834		0.646587	2.29045	6.77911
39093	10	44358.8	15822	0			6699.33	15850529	8269432		0.646587	2.10102	8.34371
39094	10	44438.8	15822	0			6699.33	18340022	5.89975e+06		0.646587	2.41221	5.97402
39095	10	44518.8	15822	0			6699.33	17707572	6507388		0.646587	2.33315	6.58167
39096	10	44598.8	15822	0			6699.33	18693244	5964057		0.646587	2.45636	6.03833
39097	10	44678.8	15822	0			6699.33	15935426	6.16207e+06		0.646587	2.11163	6.23634
39098	10	44758.8	15822	0			6699.33	13572575	8.21738e+06		0.646587	1.81628	8.29166
39099	10	44838.8	15822	0			6699.33	13682774	8345378		0.646587	1.83005	8.41966
39100	10	44918.8	15822	0			48392.7	13860309	13704587		1.60848	1.85224	13.7789
39101	10	44998.8	15822	0			6699.33	14700906	14053398		0.646587	1.95732	14.1277
39102	10	45078.8	15822	0			133101	14346310	13723193		3.56276	1.91299	13.7975
39103	10	45158.8	15822	0			437584	12296484	8.05455e+06		10.5874	1.65676	8.12882
39104	10	45238.8	15822	0			231632	9257149	785951		5.83595	1.27685	0.860228
39105	10	45318.8	15822	0			187682	9272524	1.03008e+06		4.82199	1.27877	1.10436
39106	10	45398.8	15822	0			204816	9469058	993792		5.21727	1.30334	1.06807
39107	10	45478.8	15822	0			355661	9970810	1.39613e+06		8.69738	1.36606	1.47041
39108	10	39478.8	15742	0			90140.1	10095472	10592110		2.57162	1.38164	10.6664
39109	10	39558.8	15742	0			6699.33	13349356	16362610		0.646587	1.78837	16.4369
39110	10	39638.8	15742	0			6699.33	11951722	17414240		0.646587	1.61367	17.4885
39111	10	39718.8	15742	0			58691.7	13130123	17163292		1.84609	1.76097	17.2376
39112	10	39798.8	15742	0			48139.2	13188802	17093234		1.60263	1.7683	17.1675
39113	10	39878.8	15742	0			6699.33	12934149	14316374		0.646587	1.73647	14.3907
39114	10	39958.8	15742	0			6699.33	11725638	15541990		0.646587	1.58541	15.6163
39115	10	40038.8	15742	0			6699.33	12258791	14791743		0.646587	1.65205	14.866
39116	10	40118.8	15742	0			6699.33	12352380	15856183		0.646587	1.66375	15.9305
39117	10	40198.8	15742	0			63483.6	13017687	13407135		1.95664	1.74691	13.4814
39118	10	40278.8	15742	0			6699.33	12403576	15996578		0.646587	1.67015	16.0709
39119	10	40358.8	15742	0			73044.9	12851907	12060591		2.17723	1.72619	12.1349
39120	10	40438.8	15742	0			6699.33	13566027	7819620		0.646587	1.81546	7.8939
39121	10	40518.8	15742	0			6699.33	13629513	10356341		0.646587	1.82339	10.4306
39122	10	40598.8	15742	0			6699.33	13452250	15932862		0.646587	1.80124	16.0071
39123	10	40678.8	15742	0			6699.33	13567336	11158223		0.646587	1.81562	11.2325
39124	10	40758.8	15742	0			6699.33	13407207	12493857		0.646587	1.7956	12.5681
39125	10	40838.8	15742	0			79790.5	13444561	10105360		2.33285	1.80027	10.1796
39126	10	40918.8	15742	0			6699.33	13581009	12195107		0.646587	1.81733	12.2694
39127	10	40998.8	15742	0			6699.33	15010288	12763505		0.646587	1.99599	12.8378
39128	10	41078.8	15742	0			6699.33	14504591	5.20274e+06		0.646587	1.93278	5.27702
39129	10	41158.8	15742	0			6699.33	15595110	5.56809e+06		0.646587	2.06909	5.64236
39130	10	41238.8	15742	0			6699.33	14740968	8747534		0.646587	1.96233	8.82181
39131	10	41318.8	15742	0			6699.33	16438373	6.99564e+06		0.646587	2.1745	7.06992
39132	10	41398.8	15742	0			6699.33	16154135	9236275		0.646587	2.13897	9.31055
39133	10	41478.8	15742	0			6699.33	15394075	13458099		0.646587	2.04396	13.5324
39134	10	41558.8	15742	0			6699.33	16136401	10060328		0.646587	2.13675	10.1346
39135	10	41638.8	15742	0			6699.33	15157580	9613480		0.646587	2.0144	9.68776
39136	10	41718.8	15742	0			6699.33	15632495	13598047		0.646587	2.07377	13.6723
39137	10	41798.8	15742	0			6699.33	16125612	10836195		0.646587	2.13541	10.9105
39138	10	41878.8	15742	0			6699.33	16135410	8654143		0.646587	2.13663	8.72842
39139	10	41958.8	15742	0			6699.33	18644674	4.15489e+06		0.646587	2.45029	4.22917
39140	10	42038.8	15742	0			6699.33	19798132	12180147		0.646587	2.59447	12.2544
39141	10	42118.8	15742	0			6699.33	17455192	9038575		0.646587	2.3016	9.11285
39142	10	42198.8	15742	0			6699.33	18954268	11336201		0.646587	2.48899	11.4105
39143	10	42278.8	15742	0			6699.33	18327592	10153509		0.646587	2.41065	10.2278
39144	10	42358.8	15742	0			6699.33	18740882	10380323		0.646587	2.46231	10.4546
39145	10	42438.8	15742	0			6699.33	20362586	6879404		0.646587	2.66503	6.95368
39146	10	42518.8	15742	0			6699.33	19887558	10811600		0.646587	2.60565	10.8859
39147	10	42598.8	15742	0			6699.33	19463848	6237169		0.646587	2.55268	6.31145
39148	10	42678.8	15742	0			6699.33	19725642	7.4834e+06		0.646587	2.58541	7.55768
39149	10	42758.8	15742	0			6699.33	17735294	5568959		0.646587	2.33662	5.64324
39150	10	42838.8	15742	0			6699.33	20307896	8.13818e+06		0.646587	2.65819	8.21245
39151	10	42918.8	15742	0			6699.33	18041926	11963471		0.646587	2.37494	12.0377
39152	10	42998.8	15742	0			6699.33	19585322	9379547		0.646587	2.56787	9.45382
39153	10	43078.8	15742	0			6699.33	19497486	7239156		0.646587	2.55689	7.31343
39154	10	43158.8	15742	0			6699.33	18212072	6001689		0.646587	2.39621	6.07597
39155	10	43238.8	15742	0			6699.33	17839820	7.84866e+06		0.646587	2.34968	7.92294
39156	10	43318.8	15742	0			6699.33	20193358	7.96809e+06		0.646587	2.64387	8.04237
39157	10	43398.8	15742	0			6699.33	16372088	8241193		0.646587	2.16621	8.31547
39158	10	43478.8	15742	0			6699.33	16844974	6.38512e+06		0.646587	2.22533	6.4594
39159	10	43558.8	15742	0			6699.33	18231914	6.54987e+06		0.646587	2.39869	6.62415
39160	10	43638.8	15742	0			6699.33	16502933	6919867		0.646587	2.18257	6.99414
39161	10	43718.8	15742	0			6699.33	16702607	7.85967e+06		0.646587	2.20753	7.93395
39162	10	43798.8	15742	0			6699.33	16148198	8336805		0.646587	2.13823	8.41108
39163	10	43878.8	15742	0			6699.33	16311671	6.13218e+06		0.646587	2.15866	6.20646
39164	10	43958.8	15742	0			6699.33	15931294	8542847		0.646587	2.11112	8.61712
39165	10	44038.8	15742	0			6699.33	13537772	13644463		0.646587	1.81193	13.7187
39166	10	44118.8	15742	0			6699.33	14743951	11552179		0.646587	1.9627	11.6265
39167	10	44198.8	15742	0			6699.33	15658239	5269315		0.646587	2.07698	5.34359
39168	10	44278.8	15742	0			6699.33	14943278	8.18127e+06		0.646587	1.98761	8.25554
39169	10	44358.8	15742	0			6699.33	15981854	5879332		0.646587	2.11744	5.95361
39170	10	44438.8	15742	0			6699.33	15526082	7.14789e+06		0.646587	2.06046	7.22217
39171	10	44518.8	15742	0			6699.33	17158494	5736020		0.646587	2.26452	5.8103
39172	10	44598.8	15742	0			6699.33	15283256	8493440		0.646587	2.03011	8.56772
39173	10	44678.8	15742	0			6699.33	16768007	5415583		0.646587	2.2157	5.48986
39174	10	44758.8	15742	0			6699.33	16535970	7298962		0.646587	2.1867	7.37324
39175	10	44838.8	15742	0			6699.33	14957840	7763912		0.646587	1.98943	7.83819
39176	10	44918.8	15742	0			6699.33	14007980	8549937		0.646587	1.8707	8.62421
39177	10	44998.8	15742	0			6699.33	14293323	15391738		0.646587	1.90637	15.466
39178	10	45078.8	15742	0			135285	15471163	15115653		3.61315	2.0536	15.1899
39179	10	45158.8	15742	0			189231	13238259	13538809		4.85773	1.77449	13.6131
39180	10	45238.8	15742	0			197416	9263038	3.33115e+06		5.04655	1.27758	3.40543
39181	10	45318.8	15742	0			218308	10112546	938113		5.52855	1.38377	1.01239
39182	10	45398.8	15742	0			205348	9505910	921479		5.22956	1.30794	0.995756
39183	10	45478.8	15742	0			200999	9538621	1.38136e+06		5.12921	1.31203	1.45564
39184	10	39478.8	15662	0			122375	14162217	17706514		3.31531	1.88998	17.7808
39185	10	39558.8	15662	0			6699.33	13940380	18131674		0.646587	1.86225	18.206
39186	10	39638.8	15662	0			63925.9	12929263	18213476		1.96684	1.73586	18.2878
39187	10	39718.8	15662	0			64714.2	13983033	15360921		1.98503	1.86758	15.4352
39188	10	39798.8	15662	0			6699.33	12615153	16381367		0.646587	1.6966	16.4556
39189	10	39878.8	15662	0			54039.9	12979614	12229881		1.73877	1.74216	12.3042
39190	10	39958.8	15662	0			6699.33	13169618	15834378		0.646587	1.76591	15.9087
39191	10	40038.8	15662	0			64145.9	13328552	13132528		1.97192	1.78577	13.2068
39192	10	40118.8	15662	0			67288.9	13644638	14532432		2.04443	1.82528	14.6067
39193	10	40198.8	15662	0			6699.33	12957005	11384065		0.646587	1.73933	11.4583
39194	10	40278.8	15662	0			48756.8	13037218	13868592		1.61688	1.74936	13.9429
39195	10	40358.8	15662	0			90656.3	13650484	9678831		2.58354	1.82601	9.75311
39196	10	40438.8	15662	0			74074.8	14061029	13371072		2.20099	1.87733	13.4453
39197	10	40518.8	15662	0			66229.6	13472094	14667884		2.01999	1.80372	14.7422
39198	10	40598.8	15662	0			6699.33	14450748	11645165		0.646587	1.92605	11.7194
39199	10	40678.8	15662	0			94683.2	14106237	8094282		2.67644	1.88298	8.16856
39200	10	40758.8	15662	0			61562.2	14058607	11514007		1.91231	1.87703	11.5883
39201	10	40838.8	15662	0			6699.33	14768297	9548816		0.646587	1.96574	9.62309
39202	10	40918.8	15662	0			6699.33	14623355	6824631		0.646587	1.94762	6.89891
39203	10	40998.8	15662	0			6699.33	14621282	10862581		0.646587	1.94736	10.9369
39204	10	41078.8	15662	0			6699.33	15103600	9810508		0.646587	2.00765	9.88479
39205	10	41158.8	15662	0			6699.33	14487829	13415187		0.646587	1.93068	13.4895
39206	10	41238.8	15662	0			6699.33	15139604	12227092		0.646587	2.01215	12.3014
39207	10	41318.8	15662	0			6699.33	16850198	11489566		0.646587	2.22598	11.5638
39208	10	41398.8	15662	0			6699.33	16427610	11025274		0.646587	2.17316	11.0996
39209	10	41478.8	15662	0			6699.33	15624148	6822891		0.646587	2.07272	6.89717
39210	10	41558.8	15662	0			6699.33	16278289	12504912		0.646587	2.15449	12.5792
39211	10	41638.8	15662	0			6699.33	16879876	9496731		0.646587	2.22969	9.57101
39212	10	41718.8	15662	0			6699.33	17355400	11002757		0.646587	2.28913	11.077
39213	10	41798.8	15662	0			6699.33	16695960	7.06957e+06		0.646587	2.2067	7.14385
39214	10	41878.8	15662	0			69215	18258542	9998892		2.08887	2.40202	10.0732
39215	10	41958.8	15662	0			6699.33	18874904	6921731		0.646587	2.47907	6.99601
39216	10	42038.8	15662	0			58614.6	18159846	11546626		1.84431	2.38968	11.6209
39217	10	42118.8	15662	0			6699.33	18274726	7.77307e+06		0.646587	2.40404	7.84735
39218	10	42198.8	15662	0			6699.33	20624864	7231691		0.646587	2.69781	7.30597
39219	10	42278.8	15662	0			6699.33	18479212	9896691		0.646587	2.42961	9.97097
39220	10	42358.8	15662	0			6699.33	18800692	11407158		0.646587	2.46979	11.4814
39221	10	42438.8	15662	0			6699.33	18807340	9737295		0.646587	2.47062	9.81157
39222	10	42518.8	15662	0			6699.33	18149664	11235957		0.646587	2.38841	11.3102
39223	10	42598.8	15662	0			6699.33	17627570	10459226		0.646587	2.32315	10.5335
39224	10	42678.8	15662	0			6699.33	19105516	4633696		0.646587	2.50789	4.70797
39225	10	42758.8	15662	0			6699.33	17827970	5.45596e+06		0.646587	2.3482	5.53023
39226	10	42838.8	15662	0			6699.33	18794442	8768178		0.646587	2.46901	8.84245
39227	10	42918.8	15662	0			6699.33	20548134	8780444		0.646587	2.68822	8.85472
39228	10	42998.8	15662	0			6699.33	19680130	10145014		0.646587	2.57972	10.2193
39229	10	43078.8	15662	0			6699.33	18044820	8371698		0.646587	2.37531	8.44598
39230	10	43158.8	15662	0			6699.33	18281134	6.0009e+06		0.646587	2.40485	6.07517
39231	10	43238.8	15662	0			6699.33	20512616	5.17505e+06		0.646587	2.68378	5.24932
39232	10	43318.8	15662	0			6699.33	17800040	7613596		0.646587	2.34471	7.68787
39233	10	43398.8	15662	0			6699.33	17374514	6.19092e+06		0.646587	2.29152	6.2652
39234	10	43478.8	15662	0			6699.33	17177100	8718621		0.646587	2.26684	8.7929
39235	10	43558.8	15662	0			6699.33	16522786	10757484		0.646587	2.18505	10.8318
39236	10	43638.8	15662	0			6699.33	17378044	6.52589e+06		0.646587	2.29196	6.60017
39237	10	43718.8	15662	0			62858.7	16337684	11150394		1.94222	2.16191	11.2247
39238	10	43798.8	15662	0			6699.33	15636126	9507151		0.646587	2.07422	9.58143
39239	10	43878.8	15662	0			6699.33	14949558	7596775		0.646587	1.9884	7.67105
39240	10	43958.8	15662	0			6699.33	13886828	10956866		0.646587	1.85556	11.0311
39241	10	44038.8	15662	0			6699.33	16095551	5584553		0.646587	2.13165	5.65883
39242	10	44118.8	15662	0			6699.33	14703409	8.0171e+06		0.646587	1.95763	8.09138
39243	10	44198.8	15662	0			6699.33	15141102	7651994		0.646587	2.01234	7.72627
39244	10	44278.8	15662	0			6699.33	15552985	7.9711e+06		0.646587	2.06383	8.04538
39245	10	44358.8	15662	0			6699.33	15022829	6239519		0.646587	1.99756	6.3138
39246	10	44438.8	15662	0			6699.33	13508207	9207149		0.646587	1.80823	9.28143
39247	10	44518.8	15662	0			6699.33	14529435	3.72937e+06		0.646587	1.93588	3.80364
39248	10	44598.8	15662	0			6699.33	16392781	9323421		0.646587	2.1688	9.3977
39249	10	44678.8	15662	0			6699.33	14031330	9548746		0.646587	1.87362	9.62302
39250	10	44758.8	15662	0			6699.33	15452382	6778542		0.646587	2.05125	6.85282
39251	10	44838.8	15662	0			6699.33	15962525	5.69243e+06		0.646587	2.11502	5.7667
39252	10	44918.8	15662	0			61494.1	15315441	5105341		1.91074	2.03413	5.17962
39253	10	44998.8	15662	0			6699.33	13625177	8493024		0.646587	1.82285	8.5673
39254	10	45078.8	15662	0			91117	14291675	12747635		2.59416	1.90616	12.8219
39255	10	45158.8	15662	0			111230	13811812	15104025		3.05819	1.84618	15.1783
39256	10	45238.8	15662	0			415624	11629517	8457106		10.0808	1.57339	8.53138
39257	10	45318.8	15662	0			206181	8719624	681504		5.24876	1.20966	0.755781
39258	10	45398.8	15662	0			230374	10514540	884150		5.80692	1.43402	0.958426
39259	10	45478.8	15662	0			325674	10183807	1.15708e+06		8.00556	1.39268	1.23136
39260	10	45558.8	15662	0			263895	10354260	1.53296e+06		6.58028	1.41399	1.60724
39261	10	39398.8	15582	0			119377	11032804	13307587		3.24614	1.4988	13.3819
39262	10	39478.8	15582	0			6699.33	12603042	17465294		0.646587	1.69508	17.5396
39263	10	39558.8	15582	0			6699.33	12899859	17143938		0.646587	1.73219	17.2182
39264	10	39638.8	15582	0			56154	14262277	15031635		1.78754	1.90249	15.1059
39265	10	39718.8	15582	0			6699.33	11859751	15225317		0.646587	1.60217	15.2996
39266	10	39798.8	15582	0			6699.33	12848008	10213291		0.646587	1.72571	10.2876
39267	10	39878.8	15582	0			6699.33	12996595	14324148		0.646587	1.74428	14.3984
39268	10	39958.8	15582	0			6699.33	12082687	13556949		0.646587	1.63004	13.6312
39269	10	40038.8	15582	0			6699.33	12783519	13325005		0.646587	1.71764	13.3993
39270	10	40118.8	15582	0			6699.33	12781395	11489119		0.646587	1.71738	11.5634
39271	10	40198.8	15582	0			100081	13587692	11111276		2.80098	1.81817	11.1856
39272	10	40278.8	15582	0			76112.6	13821878	8.08082e+06		2.248	1.84744	8.1551
39273	10	40358.8	15582	0			6699.33	12412419	9072008		0.646587	1.67126	9.14629
39274	10	40438.8	15582	0			6699.33	13008334	10018810		0.646587	1.74575	10.0931
39275	10	40518.8	15582	0			6699.33	14096749	8572106		0.646587	1.8818	8.64638
39276	10	40598.8	15582	0			6699.33	12516301	10815009		0.646587	1.68424	10.8893
39277	10	40678.8	15582	0			6699.33	14163226	8381130		0.646587	1.89011	8.45541
39278	10	40758.8	15582	0			62480.2	14716456	11790317		1.93349	1.95926	11.8646
39279	10	40838.8	15582	0			6699.33	13203803	7651718		0.646587	1.77018	7.726
39280	10	40918.8	15582	0			6699.33	14330187	9454771		0.646587	1.91098	9.52905
39281	10	40998.8	15582	0			77248.2	14330309	11830296		2.2742	1.91099	11.9046
39282	10	41078.8	15582	0			6699.33	14957548	12396999		0.646587	1.9894	12.4713
39283	10	41158.8	15582	0			6699.33	13608883	10096515		0.646587	1.82081	10.1708
39284	10	41238.8	15582	0			6699.33	14888612	8293066		0.646587	1.98078	8.36734
39285	10	41318.8	15582	0			6699.33	15629924	11336129		0.646587	2.07344	11.4104
39286	10	41398.8	15582	0			6699.33	15851725	12961950		0.646587	2.10117	13.0362
39287	10	41478.8	15582	0			6699.33	15919135	9553229		0.646587	2.1096	9.62751
39288	10	41558.8	15582	0			6699.33	15383836	9290120		0.646587	2.04268	9.3644
39289	10	41638.8	15582	0			6699.33	15402221	10890751		0.646587	2.04498	10.965
39290	10	41718.8	15582	0			6699.33	16081176	11924537		0.646587	2.12985	11.9988
39291	10	41798.8	15582	0			6699.33	17970704	8706314		0.646587	2.36604	8.78059
39292	10	41878.8	15582	0			6699.33	16800498	9935027		0.646587	2.21977	10.0093
39293	10	41958.8	15582	0			6699.33	17655262	6.328e+06		0.646587	2.32661	6.40228
39294	10	42038.8	15582	0			6699.33	18427062	9198162		0.646587	2.42309	9.27244
39295	10	42118.8	15582	0			6699.33	18134202	8.38568e+06		0.646587	2.38648	8.45996
39296	10	42198.8	15582	0			6699.33	19116008	9082666		0.646587	2.50921	9.15694
39297	10	42278.8	15582	0			6699.33	18440116	10853682		0.646587	2.42472	10.928
39298	10	42358.8	15582	0			6699.33	18731884	10321054		0.646587	2.46119	10.3953
39299	10	42438.8	15582	0			6699.33	18660670	6.57113e+06		0.646587	2.45229	6.64541
39300	10	42518.8	15582	0			6699.33	18323106	10125111		0.646587	2.41009	10.1994
39301	10	42598.8	15582	0			6699.33	18253424	11274047		0.646587	2.40138	11.3483
39302	10	42678.8	15582	0			6699.33	19799394	10796508		0.646587	2.59463	10.8708
39303	10	42758.8	15582	0			6699.33	18340220	10647414		0.646587	2.41223	10.7217
39304	10	42838.8	15582	0			98556.2	20261556	6600613		2.76579	2.6524	6.67489
39305	10	42918.8	15582	0			6699.33	18513286	9229893		0.646587	2.43386	9.30417
39306	10	42998.8	15582	0			6699.33	19449314	7.92669e+06		0.646587	2.55087	8.00097
39307	10	43078.8	15582	0			6699.33	18921648	6833189		0.646587	2.48491	6.90747
39308	10	43158.8	15582	0			6699.33	17963946	8345284		0.646587	2.3652	8.41956
39309	10	43238.8	15582	0			6699.33	18104742	7.09874e+06		0.646587	2.3828	7.17302
39310	10	43318.8	15582	0			6699.33	17417758	6.36125e+06		0.646587	2.29692	6.43553
39311	10	43398.8	15582	0			6699.33	16886722	8106193		0.646587	2.23054	8.18047
39312	10	43478.8	15582	0			86113.2	18107744	6599736		2.47872	2.38317	6.67401
39313	10	43558.8	15582	0			6699.33	16210671	9880387		0.646587	2.14604	9.95466
39314	10	43638.8	15582	0			6699.33	16679341	5949131		0.646587	2.20462	6.02341
39315	10	43718.8	15582	0			6699.33	15618506	10156642		0.646587	2.07202	10.2309
39316	10	43798.8	15582	0			6699.33	16886712	9912042		0.646587	2.23054	9.98632
39317	10	43878.8	15582	0			6699.33	14969665	9901005		0.646587	1.99091	9.97528
39318	10	43958.8	15582	0			6699.33	14618278	9715734		0.646587	1.94699	9.79001
39319	10	44038.8	15582	0			71594.6	14768722	9181568		2.14377	1.96579	9.25585
39320	10	44118.8	15582	0			6699.33	14417092	8.34397e+06		0.646587	1.92184	8.41824
39321	10	44198.8	15582	0			82531	15215890	6.57811e+06		2.39608	2.02169	6.65239
39322	10	44278.8	15582	0			6699.33	14761776	9853916		0.646587	1.96493	9.92819
39323	10	44358.8	15582	0			6699.33	15093099	6497539		0.646587	2.00634	6.57182
39324	10	44438.8	15582	0			6699.33	15108202	6.57704e+06		0.646587	2.00823	6.65132
39325	10	44518.8	15582	0			6699.33	14137954	6.15108e+06		0.646587	1.88695	6.22536
39326	10	44598.8	15582	0			6699.33	15501522	6097935		0.646587	2.05739	6.17221
39327	10	44678.8	15582	0			6699.33	15999199	6.99515e+06		0.646587	2.1196	7.06943
39328	10	44758.8	15582	0			6699.33	14278111	6826640		0.646587	1.90447	6.90092
39329	10	44838.8	15582	0			6699.33	15574408	4742626		0.646587	2.0665	4.8169
39330	10	44918.8	15582	0			6699.33	15049845	5586681		0.646587	2.00093	5.66096
39331	10	44998.8	15582	0			6699.33	12749021	9591918		0.646587	1.71333	9.6662
39332	10	45078.8	15582	0			6699.33	13905744	7.37578e+06		0.646587	1.85792	7.45006
39333	10	45158.8	15582	0			44169	12791711	14326850		1.51104	1.71867	14.4011
39334	10	45238.8	15582	0			86472.4	13277614	13587496		2.48701	1.77941	13.6618
39335	10	45318.8	15582	0			426611	9811112	4.80665e+06		10.3343	1.34609	4.88092
39336	10	45398.8	15582	0			151537	10948768	1.02136e+06		3.9881	1.4883	1.09563
39337	10	45478.8	15582	0			235437	12775345	1.90668e+06		5.92373	1.71662	1.98095
39338	10	45558.8	15582	0			149652	10367239	2.1196e+06		3.94461	1.41561	2.19388
39339	10	39318.8	15502	0			116464	8769752	10311268		3.17895	1.21592	10.3855
39340	10	39398.8	15502	0			96785.5	13402301	16504772		2.72494	1.79499	16.579
39341	10	39478.8	15502	0			6699.33	12392618	16871482		0.646587	1.66878	16.9458
39342	10	39558.8	15502	0			6699.33	12631333	16843996		0.646587	1.69862	16.9183
39343	10	39638.8	15502	0			6699.33	13516933	14302287		0.646587	1.80932	14.3766
39344	10	39718.8	15502	0			6699.33	12738814	10471579		0.646587	1.71206	10.5459
39345	10	39798.8	15502	0			6699.33	12343551	8971129		0.646587	1.66265	9.04541
39346	10	39878.8	15502	0			88207.9	13195477	7848749		2.52705	1.76914	7.92303
39347	10	39958.8	15502	0			6699.33	11959623	10490035		0.646587	1.61466	10.5643
39348	10	40038.8	15502	0			6699.33	13079090	9796861		0.646587	1.75459	9.87114
39349	10	40118.8	15502	0			6699.33	13326743	10307630		0.646587	1.78555	10.3819
39350	10	40198.8	15502	0			52169.6	12573528	11763258		1.69562	1.69139	11.8375
39351	10	40278.8	15502	0			6699.33	12689828	11146626		0.646587	1.70593	11.2209
39352	10	40358.8	15502	0			6699.33	12643580	11792407		0.646587	1.70015	11.8667
39353	10	40438.8	15502	0			6699.33	13140479	11126841		0.646587	1.76226	11.2011
39354	10	40518.8	15502	0			6699.33	12947997	11727722		0.646587	1.7382	11.802
39355	10	40598.8	15502	0			6699.33	14268038	8.11926e+06		0.646587	1.90321	8.19354
39356	10	40678.8	15502	0			6699.33	14260539	10147205		0.646587	1.90227	10.2215
39357	10	40758.8	15502	0			6699.33	13179377	14354118		0.646587	1.76713	14.4284
39358	10	40838.8	15502	0			6699.33	15229994	6.73545e+06		0.646587	2.02345	6.80973
39359	10	40918.8	15502	0			6699.33	14009231	11601565		0.646587	1.87086	11.6758
39360	10	40998.8	15502	0			6699.33	15189822	8.32391e+06		0.646587	2.01843	8.39819
39361	10	41078.8	15502	0			6699.33	14660227	11703303		0.646587	1.95223	11.7776
39362	10	41158.8	15502	0			59582.6	14540326	7.81748e+06		1.86664	1.93724	7.89176
39363	10	41238.8	15502	0			6699.33	15063642	6329397		0.646587	2.00266	6.40367
39364	10	41318.8	15502	0			6699.33	15892648	10859602		0.646587	2.10629	10.9339
39365	10	41398.8	15502	0			6699.33	16256491	11915288		0.646587	2.15177	11.9896
39366	10	41478.8	15502	0			6699.33	14755373	8995120		0.646587	1.96413	9.0694
39367	10	41558.8	15502	0			6699.33	17291216	7.756e+06		0.646587	2.28111	7.83028
39368	10	41638.8	15502	0			6699.33	15949398	8.06918e+06		0.646587	2.11338	8.14346
39369	10	41718.8	15502	0			6699.33	17213092	9092665		0.646587	2.27134	9.16694
39370	10	41798.8	15502	0			6699.33	18048380	7836148		0.646587	2.37575	7.91043
39371	10	41878.8	15502	0			6699.33	16125031	11018827		0.646587	2.13533	11.0931
39372	10	41958.8	15502	0			6699.33	17673260	10259686		0.646587	2.32886	10.334
39373	10	42038.8	15502	0			6699.33	18445162	8.00677e+06		0.646587	2.42535	8.08104
39374	10	42118.8	15502	0			53690.5	17075764	11590705		1.73071	2.25417	11.665
39375	10	42198.8	15502	0			6699.33	17990760	11406783		0.646587	2.36855	11.4811
39376	10	42278.8	15502	0			6699.33	18588172	8.23048e+06		0.646587	2.44323	8.30476
39377	10	42358.8	15502	0			6699.33	19391514	9111723		0.646587	2.54364	9.186
39378	10	42438.8	15502	0			6699.33	19069552	8650384		0.646587	2.5034	8.72466
39379	10	42518.8	15502	0			6699.33	18287754	10129574		0.646587	2.40567	10.2039
39380	10	42598.8	15502	0			6699.33	18481566	6360310		0.646587	2.4299	6.43459
39381	10	42678.8	15502	0			6699.33	18636830	8181875		0.646587	2.44931	8.25615
39382	10	42758.8	15502	0			6699.33	19582544	6.36832e+06		0.646587	2.56752	6.44259
39383	10	42838.8	15502	0			6699.33	18302618	11337351		0.646587	2.40753	11.4116
39384	10	42918.8	15502	0			6699.33	18460812	9166722		0.646587	2.42731	9.241
39385	10	42998.8	15502	0			6699.33	17832498	7.44699e+06		0.646587	2.34877	7.52126
39386	10	43078.8	15502	0			6699.33	15882915	10048334		0.646587	2.10507	10.1226
39387	10	43158.8	15502	0			6699.33	17444848	6.55645e+06		0.646587	2.30031	6.63072
39388	10	43238.8	15502	0			6699.33	16270935	10779901		0.646587	2.15357	10.8542
39389	10	43318.8	15502	0			6699.33	19199242	5.74925e+06		0.646587	2.51961	5.82353
39390	10	43398.8	15502	0			6699.33	16475364	7.98163e+06		0.646587	2.17912	8.0559
39391	10	43478.8	15502	0			6699.33	16218350	7340911		0.646587	2.147	7.41519
39392	10	43558.8	15502	0			6699.33	16013718	8.35563e+06		0.646587	2.12142	8.4299
39393	10	43638.8	15502	0			6699.33	14927409	9097776		0.646587	1.98563	9.17205
39394	10	43718.8	15502	0			6699.33	16384427	8552442		0.646587	2.16776	8.62672
39395	10	43798.8	15502	0			6699.33	14040202	10903086		0.646587	1.87473	10.9774
39396	10	43878.8	15502	0			6699.33	13665029	8242021		0.646587	1.82783	8.3163
39397	10	43958.8	15502	0			6699.33	14298338	7.36139e+06		0.646587	1.907	7.43566
39398	10	44038.8	15502	0			6699.33	14967323	9608583		0.646587	1.99062	9.68286
39399	10	44118.8	15502	0			6699.33	13463333	10702285		0.646587	1.80262	10.7766
39400	10	44198.8	15502	0			6699.33	13628202	6904387		0.646587	1.82323	6.97866
39401	10	44278.8	15502	0			6699.33	15638237	6.74431e+06		0.646587	2.07448	6.81858
39402	10	44358.8	15502	0			6699.33	14079385	11132532		0.646587	1.87963	11.2068
39403	10	44438.8	15502	0			6699.33	14162765	7.26647e+06		0.646587	1.89005	7.34075
39404	10	44518.8	15502	0			6699.33	13044995	7.20255e+06		0.646587	1.75033	7.27682
39405	10	44598.8	15502	0			6699.33	13286142	7.18722e+06		0.646587	1.78047	7.2615
39406	10	44678.8	15502	0			69866.6	14842470	5084285		2.1039	1.97501	5.15856
39407	10	44758.8	15502	0			6699.33	15420119	6.54842e+06		0.646587	2.04722	6.6227
39408	10	44838.8	15502	0			6699.33	14204622	5066859		0.646587	1.89528	5.14114
39409	10	44918.8	15502	0			6699.33	14524580	4958400		0.646587	1.93528	5.03268
39410	10	44998.8	15502	0			6699.33	13423275	5.59862e+06		0.646587	1.79761	5.6729
39411	10	45078.8	15502	0			6699.33	14071144	5.49555e+06		0.646587	1.8786	5.56982
39412	10	45158.8	15502	0			6699.33	13456854	10745063		0.646587	1.80181	10.8193
39413	10	45238.8	15502	0			108633	14052728	13298332		2.99826	1.8763	13.3726
39414	10	45318.8	15502	0			212843	11135853	10517350		5.40247	1.51169	10.5916
39415	10	45398.8	15502	0			191785	10075729	1.87594e+06		4.91664	1.37917	1.95022
39416	10	45478.8	15502	0			280584	13164142	1.85679e+06		6.9653	1.76522	1.93106
39417	10	45558.8	15502	0			215648	13150674	2583999		5.46717	1.76354	2.65828
39418	10	45638.8	15502	0			217508	12635482	2.54599e+06		5.51009	1.69914	2.62027
39419	10	39318.8	15422	0			84519.5	12857697	18263656		2.44195	1.72692	18.3379
39420	10	39398.8	15422	0			6699.33	13812070	19082268		0.646587	1.84621	19.1565
39421	10	39478.8	15422	0			6699.33	13848812	17037086		0.646587	1.85081	17.1114
39422	10	39558.8	15422	0			6699.33	12575881	14362302		0.646587	1.69169	14.4366
39423	10	39638.8	15422	0			6699.33	12116208	13967079		0.646587	1.63423	14.0414
39424	10	39718.8	15422	0			6699.33	12354377	13703059		0.646587	1.664	13.7773
39425	10	39798.8	15422	0			6699.33	12642172	10886051		0.646587	1.69998	10.9603
39426	10	39878.8	15422	0			94578.1	12573514	12473358		2.67401	1.69139	12.5476
39427	10	39958.8	15422	0			63851.7	14373459	8467636		1.96513	1.91639	8.54191
39428	10	40038.8	15422	0			6699.33	12916684	12348385		0.646587	1.73429	12.4227
39429	10	40118.8	15422	0			6699.33	13680875	11946985		0.646587	1.82981	12.0213
39430	10	40198.8	15422	0			6699.33	13474680	9556938		0.646587	1.80404	9.63121
39431	10	40278.8	15422	0			49920.6	12888183	13475079		1.64373	1.73073	13.5494
39432	10	40358.8	15422	0			93885.1	13545496	7.52754e+06		2.65803	1.81289	7.60181
39433	10	40438.8	15422	0			6699.33	13922842	6.3699e+06		0.646587	1.86006	6.44418
39434	10	40518.8	15422	0			6699.33	13474413	14164267		0.646587	1.80401	14.2385
39435	10	40598.8	15422	0			6699.33	14649139	10608636		0.646587	1.95085	10.6829
39436	10	40678.8	15422	0			6699.33	14921262	7.84891e+06		0.646587	1.98486	7.92319
39437	10	40758.8	15422	0			6699.33	14007005	9279556		0.646587	1.87058	9.35383
39438	10	40838.8	15422	0			84634.7	15197096	5.14893e+06		2.44461	2.01934	5.2232
39439	10	40918.8	15422	0			6699.33	13655405	9507576		0.646587	1.82663	9.58185
39440	10	40998.8	15422	0			6699.33	15289876	6771150		0.646587	2.03094	6.84543
39441	10	41078.8	15422	0			6699.33	14236028	11739196		0.646587	1.89921	11.8135
39442	10	41158.8	15422	0			6699.33	14333249	11386816		0.646587	1.91136	11.4611
39443	10	41238.8	15422	0			6699.33	15714062	8321359		0.646587	2.08396	8.39564
39444	10	41318.8	15422	0			6699.33	15708010	7.62294e+06		0.646587	2.08321	7.69721
39445	10	41398.8	15422	0			6699.33	15837823	7206427		0.646587	2.09943	7.2807
39446	10	41478.8	15422	0			6699.33	16096750	9752753		0.646587	2.1318	9.82703
39447	10	41558.8	15422	0			6699.33	15746350	6233621		0.646587	2.088	6.3079
39448	10	41638.8	15422	0			6699.33	16447299	10596577		0.646587	2.17562	10.6709
39449	10	41718.8	15422	0			6699.33	17419554	8064028		0.646587	2.29715	8.13831
39450	10	41798.8	15422	0			6699.33	17503064	7.6508e+06		0.646587	2.30759	7.72507
39451	10	41878.8	15422	0			6699.33	16567763	9830653		0.646587	2.19067	9.90493
39452	10	41958.8	15422	0			6699.33	17622764	12446817		0.646587	2.32255	12.5211
39453	10	42038.8	15422	0			6699.33	17504724	12263436		0.646587	2.30779	12.3377
39454	10	42118.8	15422	0			6699.33	17467450	15182911		0.646587	2.30314	15.2572
39455	10	42198.8	15422	0			6699.33	18857110	9595738		0.646587	2.47684	9.67001
39456	10	42278.8	15422	0			6699.33	18847148	10287588		0.646587	2.4756	10.3619
39457	10	42358.8	15422	0			69540.8	19066102	6.90669e+06		2.09639	2.50297	6.98097
39458	10	42438.8	15422	0			6699.33	18399224	9667687		0.646587	2.41961	9.74196
39459	10	42518.8	15422	0			6699.33	18664376	7761984		0.646587	2.45275	7.83626
39460	10	42598.8	15422	0			6699.33	17377922	7.34291e+06		0.646587	2.29194	7.41719
39461	10	42678.8	15422	0			6699.33	19581412	7513756		0.646587	2.56738	7.58803
39462	10	42758.8	15422	0			6699.33	19321836	8608452		0.646587	2.53493	8.68273
39463	10	42838.8	15422	0			6699.33	18475292	10847796		0.646587	2.42912	10.9221
39464	10	42918.8	15422	0			6699.33	19372278	10983543		0.646587	2.54124	11.0578
39465	10	42998.8	15422	0			6699.33	18428116	8271713		0.646587	2.42322	8.34599
39466	10	43078.8	15422	0			6699.33	18492262	6482480		0.646587	2.43124	6.55676
39467	10	43158.8	15422	0			6699.33	18421964	10536025		0.646587	2.42245	10.6103
39468	10	43238.8	15422	0			6699.33	18260222	7.70686e+06		0.646587	2.40223	7.78114
39469	10	43318.8	15422	0			6699.33	18210040	8143997		0.646587	2.39596	8.21827
39470	10	43398.8	15422	0			6699.33	17603896	8112084		0.646587	2.32019	8.18636
39471	10	43478.8	15422	0			6699.33	15930025	9110403		0.646587	2.11096	9.18468
39472	10	43558.8	15422	0			6699.33	16197547	9430025		0.646587	2.1444	9.5043
39473	10	43638.8	15422	0			6699.33	16108643	7.07002e+06		0.646587	2.13328	7.14429
39474	10	43718.8	15422	0			6699.33	15140737	9057002		0.646587	2.0123	9.13128
39475	10	43798.8	15422	0			6699.33	15577030	7663653		0.646587	2.06683	7.73793
39476	10	43878.8	15422	0			6699.33	13753774	10141764		0.646587	1.83893	10.216
39477	10	43958.8	15422	0			6699.33	14320802	4411602		0.646587	1.9098	4.48588
39478	10	44038.8	15422	0			6699.33	13963047	10587201		0.646587	1.86508	10.6615
39479	10	44118.8	15422	0			87131.5	16391986	9225142		2.50221	2.1687	9.29942
39480	10	44198.8	15422	0			6699.33	14157755	9368086		0.646587	1.88942	9.44236
39481	10	44278.8	15422	0			6699.33	14071756	9814424		0.646587	1.87867	9.8887
39482	10	44358.8	15422	0			6699.33	15907383	7.58371e+06		0.646587	2.10813	7.65799
39483	10	44438.8	15422	0			6699.33	13462722	11231997		0.646587	1.80254	11.3063
39484	10	44518.8	15422	0			6699.33	12822191	9345746		0.646587	1.72248	9.42002
39485	10	44598.8	15422	0			6699.33	14054458	7.86399e+06		0.646587	1.87651	7.93827
39486	10	44678.8	15422	0			6699.33	13773236	9718104		0.646587	1.84136	9.79238
39487	10	44758.8	15422	0			6699.33	13724402	7.54507e+06		0.646587	1.83525	7.61935
39488	10	44838.8	15422	0			6699.33	15001085	6012869		0.646587	1.99484	6.08715
39489	10	44918.8	15422	0			6699.33	15217917	4.26833e+06		0.646587	2.02194	4.34261
39490	10	44998.8	15422	0			6699.33	12336710	4711177		0.646587	1.66179	4.78545
39491	10	45078.8	15422	0			6699.33	14776875	4.06847e+06		0.646587	1.96681	4.14275
39492	10	45158.8	15422	0			6699.33	13058171	9007673		0.646587	1.75198	9.08195
39493	10	45238.8	15422	0			61997.2	12958970	11208177		1.92235	1.73958	11.2825
39494	10	45318.8	15422	0			194934	11592489	11490908		4.98931	1.56877	11.5652
39495	10	45398.8	15422	0			275949	10988168	6.80816e+06		6.85837	1.49323	6.88244
39496	10	45478.8	15422	0			260158	13926222	2.68627e+06		6.49406	1.86048	2.76055
39497	10	45558.8	15422	0			196780	14067681	2.93577e+06		5.03188	1.87816	3.01005
39498	10	45638.8	15422	0			198507	13534996	3.11657e+06		5.07173	1.81158	3.19085
39499	10	39238.8	15342	0			69827.3	11956292	16679114		2.10299	1.61424	16.7534
39500	10	39318.8	15342	0			6699.33	14655590	18585884		0.646587	1.95165	18.6602
39501	10	39398.8	15342	0			6699.33	13004940	17918060		0.646587	1.74532	17.9923
39502	10	39478.8	15342	0			72316.1	12839206	13302292		2.16041	1.7246	13.3766
39503	10	39558.8	15342	0			6699.33	13644032	13479690		0.646587	1.82521	13.554
39504	10	39638.8	15342	0			6699.33	11802529	9485940		0.646587	1.59502	9.56022
39505	10	39718.8	15342	0			6699.33	12316269	12878123		0.646587	1.65924	12.9524
39506	10	39798.8	15342	0			6699.33	14042995	9022161		0.646587	1.87508	9.09644
39507	10	39878.8	15342	0			6699.33	12330702	11433352		0.646587	1.66104	11.5076
39508	10	39958.8	15342	0			6699.33	12664337	9486934		0.646587	1.70275	9.56121
39509	10	40038.8	15342	0			6699.33	12725562	9456389		0.646587	1.7104	9.53067
39510	10	40118.8	15342	0			6699.33	12991026	11165449		0.646587	1.74358	11.2397
39511	10	40198.8	15342	0			6699.33	13783233	9383975		0.646587	1.84261	9.45825
39512	10	40278.8	15342	0			6699.33	13662622	12656113		0.646587	1.82753	12.7304
39513	10	40358.8	15342	0			6699.33	13995017	11422876		0.646587	1.86908	11.4972
39514	10	40438.8	15342	0			6699.33	13728558	9141466		0.646587	1.83577	9.21574
39515	10	40518.8	15342	0			6699.33	13806940	11258239		0.646587	1.84557	11.3325
39516	10	40598.8	15342	0			6699.33	12835777	13765614		0.646587	1.72418	13.8399
39517	10	40678.8	15342	0			6699.33	14275122	7.14424e+06		0.646587	1.90409	7.21851
39518	10	40758.8	15342	0			6699.33	12761557	8471319		0.646587	1.7149	8.5456
39519	10	40838.8	15342	0			6699.33	12786159	8769865		0.646587	1.71797	8.84414
39520	10	40918.8	15342	0			6699.33	14501366	8733056		0.646587	1.93237	8.80733
39521	10	40998.8	15342	0			6699.33	14120010	12290620		0.646587	1.88471	12.3649
39522	10	41078.8	15342	0			6699.33	14434140	9021863		0.646587	1.92397	9.09614
39523	10	41158.8	15342	0			6699.33	14282753	10063122		0.646587	1.90505	10.1374
39524	10	41238.8	15342	0			6699.33	14547694	9391487		0.646587	1.93817	9.46576
39525	10	41318.8	15342	0			6699.33	14155214	8146664		0.646587	1.88911	8.22094
39526	10	41398.8	15342	0			6699.33	15446056	7.46997e+06		0.646587	2.05046	7.54425
39527	10	41478.8	15342	0			55482.5	15782581	11116613		1.77205	2.09253	11.1909
39528	10	41558.8	15342	0			6699.33	15215164	12609327		0.646587	2.0216	12.6836
39529	10	41638.8	15342	0			6699.33	16473158	9909318		0.646587	2.17885	9.98359
39530	10	41718.8	15342	0			6699.33	15842128	7.92505e+06		0.646587	2.09997	7.99933
39531	10	41798.8	15342	0			6699.33	15718172	11148973		0.646587	2.08448	11.2233
39532	10	41878.8	15342	0			6699.33	17436080	11881417		0.646587	2.29921	11.9557
39533	10	41958.8	15342	0			6699.33	15529135	12386182		0.646587	2.06085	12.4605
39534	10	42038.8	15342	0			61449.7	16666968	8484514		1.90972	2.20308	8.55879
39535	10	42118.8	15342	0			6699.33	18223258	9381480		0.646587	2.39761	9.45576
39536	10	42198.8	15342	0			65819.6	18332732	8636588		2.01053	2.4113	8.71087
39537	10	42278.8	15342	0			6699.33	18192094	11020440		0.646587	2.39372	11.0947
39538	10	42358.8	15342	0			6699.33	18214082	10764807		0.646587	2.39646	10.8391
39539	10	42438.8	15342	0			6699.33	18499096	12412397		0.646587	2.43209	12.4867
39540	10	42518.8	15342	0			6699.33	16669559	10066549		0.646587	2.2034	10.1408
39541	10	42598.8	15342	0			6699.33	18152338	7709502		0.646587	2.38875	7.78378
39542	10	42678.8	15342	0			6699.33	19861996	6142458		0.646587	2.60245	6.21673
39543	10	42758.8	15342	0			6699.33	17788986	9072977		0.646587	2.34333	9.14725
39544	10	42838.8	15342	0			6699.33	19025370	7.7327e+06		0.646587	2.49788	7.80697
39545	10	42918.8	15342	0			6699.33	18155792	6.62045e+06		0.646587	2.38918	6.69473
39546	10	42998.8	15342	0			6699.33	18440686	7.52059e+06		0.646587	2.42479	7.59487
39547	10	43078.8	15342	0			6699.33	18177498	7251839		0.646587	2.39189	7.32612
39548	10	43158.8	15342	0			6699.33	18309732	8416238		0.646587	2.40842	8.49052
39549	10	43238.8	15342	0			6699.33	16630087	6861231		0.646587	2.19846	6.93551
39550	10	43318.8	15342	0			6699.33	16679199	9196819		0.646587	2.2046	9.2711
39551	10	43398.8	15342	0			6699.33	18408556	5.85639e+06		0.646587	2.42077	5.93067
39552	10	43478.8	15342	0			6699.33	15075483	9913654		0.646587	2.00414	9.98793
39553	10	43558.8	15342	0			6699.33	16619299	10364062		0.646587	2.19712	10.4383
39554	10	43638.8	15342	0			6699.33	16846918	9382941		0.646587	2.22557	9.45722
39555	10	43718.8	15342	0			6699.33	15864142	9239943		0.646587	2.10272	9.31422
39556	10	43798.8	15342	0			6699.33	14802520	7.11691e+06		0.646587	1.97002	7.19119
39557	10	43878.8	15342	0			6699.33	14612566	12008967		0.646587	1.94627	12.0832
39558	10	43958.8	15342	0			6699.33	13689567	9671208		0.646587	1.8309	9.74549
39559	10	44038.8	15342	0			6699.33	13881981	9645864		0.646587	1.85495	9.72014
39560	10	44118.8	15342	0			92981.5	13998148	7.0938e+06		2.63718	1.86947	7.16808
39561	10	44198.8	15342	0			6699.33	13898197	10625002		0.646587	1.85698	10.6993
39562	10	44278.8	15342	0			6699.33	14127086	9043653		0.646587	1.88559	9.11793
39563	10	44358.8	15342	0			6699.33	12750391	9701470		0.646587	1.7135	9.77575
39564	10	44438.8	15342	0			6699.33	13557520	8771623		0.646587	1.81439	8.8459
39565	10	44518.8	15342	0			6699.33	14416204	8938794		0.646587	1.92173	9.01307
39566	10	44598.8	15342	0			6699.33	13829799	7.77647e+06		0.646587	1.84843	7.85075
39567	10	44678.8	15342	0			6699.33	13328180	7632181		0.646587	1.78573	7.70646
39568	10	44758.8	15342	0			6699.33	13209880	9933719		0.646587	1.77094	10.008
39569	10	44838.8	15342	0			6699.33	14564186	5.36515e+06		0.646587	1.94023	5.43943
39570	10	44918.8	15342	0			6699.33	12810149	7.27048e+06		0.646587	1.72097	7.34476
39571	10	44998.8	15342	0			6699.33	16582792	3100349		0.646587	2.19255	3.17463
39572	10	45078.8	15342	0			6699.33	12851637	5.79473e+06		0.646587	1.72616	5.869
39573	10	45158.8	15342	0			6699.33	12801760	6758579		0.646587	1.71992	6.83286
39574	10	45238.8	15342	0			6699.33	13436543	9548330		0.646587	1.79927	9.62261
39575	10	45318.8	15342	0			6699.33	13058871	16106990		0.646587	1.75206	16.1813
39576	10	45398.8	15342	0			256556	13632708	11941623		6.41096	1.82379	12.0159
39577	10	45478.8	15342	0			267212	12289509	4.85154e+06		6.65679	1.65589	4.92581
39578	10	45558.8	15342	0			410166	15498496	2.38684e+06		9.95486	2.05702	2.46112
39579	10	45638.8	15342	0			226915	13428155	2.78697e+06		5.72712	1.79822	2.86124
39580	10	45718.8	15342	0			253761	12847900	2.65556e+06		6.34648	1.72569	2.72984
39581	10	39158.8	15262	0			212248	11752271	13502338		5.38875	1.58874	13.5766
39582	10	39238.8	15262	0			6699.33	12371615	6008.07		0.646587	1.66616	0.0802851
39583	10	39318.8	15262	0			6699.33	14021332	19014958		0.646587	1.87237	19.0892
39584	10	39398.8	15262	0			6699.33	12828793	16590891		0.646587	1.7233	16.6652
39585	10	39478.8	15262	0			6699.33	12180970	13812465		0.646587	1.64233	13.8867
39586	10	39558.8	15262	0			60851	12918189	10906520		1.8959	1.73448	10.9808
39587	10	39638.8	15262	0			63157.9	12442836	11769709		1.94913	1.67506	11.844
39588	10	39718.8	15262	0			6699.33	12343013	12140804		0.646587	1.66258	12.2151
39589	10	39798.8	15262	0			62596.9	12887797	10854534		1.93619	1.73068	10.9288
39590	10	39878.8	15262	0			6699.33	13219688	10203045		0.646587	1.77216	10.2773
39591	10	39958.8	15262	0			6699.33	12870992	9863933		0.646587	1.72858	9.93821
39592	10	40038.8	15262	0			76957.3	13359842	8.09007e+06		2.26749	1.78968	8.16435
39593	10	40118.8	15262	0			6699.33	14494017	7476844		0.646587	1.93146	7.55112
39594	10	40198.8	15262	0			6699.33	13347695	11331902		0.646587	1.78817	11.4062
39595	10	40278.8	15262	0			6699.33	14541915	11104394		0.646587	1.93744	11.1787
39596	10	40358.8	15262	0			6699.33	12867841	11578053		0.646587	1.72818	11.6523
39597	10	40438.8	15262	0			56876.1	13199604	13217788		1.8042	1.76965	13.2921
39598	10	40518.8	15262	0			6699.33	14139830	6.19503e+06		0.646587	1.88718	6.26931
39599	10	40598.8	15262	0			6699.33	13561818	10976087		0.646587	1.81493	11.0504
39600	10	40678.8	15262	0			61815.6	13837141	9451336		1.91816	1.84935	9.52561
39601	10	40758.8	15262	0			6699.33	14794507	6832241		0.646587	1.96902	6.90652
39602	10	40838.8	15262	0			6699.33	13002124	5.80022e+06		0.646587	1.74497	5.8745
39603	10	40918.8	15262	0			72950.8	13068119	8.14667e+06		2.17506	1.75322	8.22095
39604	10	40998.8	15262	0			6699.33	14246276	11084167		0.646587	1.90049	11.1584
39605	10	41078.8	15262	0			6699.33	15061676	7.54178e+06		0.646587	2.00241	7.61606
39606	10	41158.8	15262	0			6699.33	14771349	11531801		0.646587	1.96612	11.6061
39607	10	41238.8	15262	0			6699.33	14142372	9011946		0.646587	1.8875	9.08622
39608	10	41318.8	15262	0			6699.33	15881422	7.83775e+06		0.646587	2.10488	7.91202
39609	10	41398.8	15262	0			6699.33	14423313	8413028		0.646587	1.92262	8.4873
39610	10	41478.8	15262	0			6699.33	15775762	8863306		0.646587	2.09167	8.93758
39611	10	41558.8	15262	0			6699.33	15713126	9690301		0.646587	2.08384	9.76458
39612	10	41638.8	15262	0			6699.33	16726520	9942939		0.646587	2.21052	10.0172
39613	10	41718.8	15262	0			6699.33	15655027	9925825		0.646587	2.07658	10.0001
39614	10	41798.8	15262	0			6699.33	15378345	11604210		0.646587	2.042	11.6785
39615	10	41878.8	15262	0			6699.33	15692119	7146778		0.646587	2.08122	7.22105
39616	10	41958.8	15262	0			6699.33	15935665	9657761		0.646587	2.11166	9.73204
39617	10	42038.8	15262	0			6699.33	15397173	14030396		0.646587	2.04435	14.1047
39618	10	42118.8	15262	0			6699.33	17146628	9903004		0.646587	2.26303	9.97728
39619	10	42198.8	15262	0			6699.33	19178050	10288987		0.646587	2.51696	10.3633
39620	10	42278.8	15262	0			6699.33	19118338	10742706		0.646587	2.5095	10.817
39621	10	42358.8	15262	0			6699.33	18449276	11912798		0.646587	2.42586	11.9871
39622	10	42438.8	15262	0			6699.33	18042450	9134968		0.646587	2.37501	9.20924
39623	10	42518.8	15262	0			6699.33	17504468	9610639		0.646587	2.30776	9.68492
39624	10	42598.8	15262	0			6699.33	16508388	12375185		0.646587	2.18325	12.4495
39625	10	42678.8	15262	0			6699.33	16890192	11791006		0.646587	2.23098	11.8653
39626	10	42758.8	15262	0			6699.33	17045694	6.22546e+06		0.646587	2.25042	6.29973
39627	10	42838.8	15262	0			6699.33	18380232	8995743		0.646587	2.41723	9.07002
39628	10	42918.8	15262	0			71019.8	17733120	6650607		2.13051	2.33634	6.72488
39629	10	42998.8	15262	0			6699.33	17808838	9906195		0.646587	2.34581	9.98047
39630	10	43078.8	15262	0			6699.33	20014078	7.04134e+06		0.646587	2.62146	7.11562
39631	10	43158.8	15262	0			6699.33	17657652	6480442		0.646587	2.32691	6.55472
39632	10	43238.8	15262	0			6699.33	18098728	7308119		0.646587	2.38205	7.3824
39633	10	43318.8	15262	0			6699.33	16608204	8240738		0.646587	2.19573	8.31502
39634	10	43398.8	15262	0			6699.33	15821195	9351766		0.646587	2.09735	9.42604
39635	10	43478.8	15262	0			6699.33	15783664	10265712		0.646587	2.09266	10.34
39636	10	43558.8	15262	0			6699.33	15758842	10327724		0.646587	2.08956	10.402
39637	10	43638.8	15262	0			6699.33	15038589	10090634		0.646587	1.99953	10.1649
39638	10	43718.8	15262	0			6699.33	15615194	7.31539e+06		0.646587	2.0716	7.38966
39639	10	43798.8	15262	0			6699.33	14868027	9303555		0.646587	1.97821	9.37783
39640	10	43878.8	15262	0			6699.33	15317465	7311526		0.646587	2.03439	7.3858
39641	10	43958.8	15262	0			6699.33	14463000	10853544		0.646587	1.92758	10.9278
39642	10	44038.8	15262	0			6699.33	15249045	6.7187e+06		0.646587	2.02583	6.79298
39643	10	44118.8	15262	0			6699.33	14170144	9121520		0.646587	1.89097	9.1958
39644	10	44198.8	15262	0			6699.33	13294840	10636377		0.646587	1.78156	10.7107
39645	10	44278.8	15262	0			6699.33	14148577	9164454		0.646587	1.88828	9.23873
39646	10	44358.8	15262	0			6699.33	12379945	7359427		0.646587	1.6672	7.4337
39647	10	44438.8	15262	0			73505.3	12835409	6.50593e+06		2.18785	1.72413	6.58021
39648	10	44518.8	15262	0			6699.33	14945540	7448319		0.646587	1.9879	7.5226
39649	10	44598.8	15262	0			6699.33	13196833	10072303		0.646587	1.76931	10.1466
39650	10	44678.8	15262	0			6699.33	12710435	9783406		0.646587	1.70851	9.85768
39651	10	44758.8	15262	0			85729	14496296	9713408		2.46986	1.93174	9.78768
39652	10	44838.8	15262	0			6699.33	12569638	8255879		0.646587	1.69091	8.33016
39653	10	44918.8	15262	0			6699.33	14306943	6478714		0.646587	1.90807	6.55299
39654	10	44998.8	15262	0			6699.33	11070507	8678879		0.646587	1.50352	8.75316
39655	10	45078.8	15262	0			6699.33	13299919	7.29207e+06		0.646587	1.78219	7.36635
39656	10	45158.8	15262	0			6699.33	12339484	6926142		0.646587	1.66214	7.00042
39657	10	45238.8	15262	0			6699.33	12436636	8889949		0.646587	1.67428	8.96423
39658	10	45318.8	15262	0			6699.33	11932601	12730780		0.646587	1.61128	12.8051
39659	10	45398.8	15262	0			6699.33	12855566	14628331		0.646587	1.72665	14.7026
39660	10	45478.8	15262	0			211648	12337261	10414593		5.37489	1.66186	10.4889
39661	10	45558.8	15262	0			287356	12728821	2.44049e+06		7.12154	1.71081	2.51477
39662	10	45638.8	15262	0			444380	14150802	2.29541e+06		10.7442	1.88855	2.36969
39663	10	45718.8	15262	0			251990	11188539	1.96985e+06		6.30562	1.51827	2.04413
39664	10	39078.8	15182	0			124993	7.36394e+06	8438407		3.37571	1.0402	8.51268
39665	10	39158.8	15182	0			60139.5	10652169	16577928		1.87949	1.45123	16.6522
39666	10	39238.8	15182	0			6699.33	12631497	17118258		0.646587	1.69864	17.1925
39667	10	39318.8	15182	0			6699.33	12538728	18672456		0.646587	1.68704	18.7467
39668	10	39398.8	15182	0			48735.9	11850959	13544377		1.6164	1.60107	13.6187
39669	10	39478.8	15182	0			54521.6	12851267	12561147		1.74988	1.72611	12.6354
39670	10	39558.8	15182	0			6699.33	11870900	11786532		0.646587	1.60357	11.8608
39671	10	39638.8	15182	0			6699.33	12641588	10484958		0.646587	1.6999	10.5592
39672	10	39718.8	15182	0			6699.33	11995909	13158438		0.646587	1.61919	13.2327
39673	10	39798.8	15182	0			82369.2	13422659	8407240		2.39235	1.79754	8.48152
39674	10	39878.8	15182	0			6699.33	13028321	7.23122e+06		0.646587	1.74824	7.3055
39675	10	39958.8	15182	0			6699.33	12578035	9866423		0.646587	1.69196	9.9407
39676	10	40038.8	15182	0			6699.33	13286570	9566108		0.646587	1.78053	9.64039
39677	10	40118.8	15182	0			6699.33	14071389	11055059		0.646587	1.87863	11.1293
39678	10	40198.8	15182	0			80343.8	13330748	7.8607e+06		2.34562	1.78605	7.93498
39679	10	40278.8	15182	0			6699.33	13741253	7.42953e+06		0.646587	1.83736	7.50381
39680	10	40358.8	15182	0			6699.33	13021250	11015443		0.646587	1.74736	11.0897
39681	10	40438.8	15182	0			6699.33	13020515	9986059		0.646587	1.74727	10.0603
39682	10	40518.8	15182	0			6699.33	13302650	10180820		0.646587	1.78254	10.2551
39683	10	40598.8	15182	0			6699.33	12946129	10046009		0.646587	1.73797	10.1203
39684	10	40678.8	15182	0			6699.33	13646682	8529548		0.646587	1.82554	8.60383
39685	10	40758.8	15182	0			6699.33	14727418	6.80102e+06		0.646587	1.96063	6.8753
39686	10	40838.8	15182	0			6699.33	13349518	7.92895e+06		0.646587	1.78839	8.00323
39687	10	40918.8	15182	0			6699.33	13468579	9529452		0.646587	1.80328	9.60373
39688	10	40998.8	15182	0			85040.9	13287072	8815484		2.45398	1.78059	8.88976
39689	10	41078.8	15182	0			6699.33	14284070	10174002		0.646587	1.90521	10.2483
39690	10	41158.8	15182	0			6699.33	13767394	11622378		0.646587	1.84063	11.6967
39691	10	41238.8	15182	0			6699.33	14462108	7803154		0.646587	1.92747	7.87743
39692	10	41318.8	15182	0			6699.33	14458373	7.24773e+06		0.646587	1.927	7.32201
39693	10	41398.8	15182	0			6699.33	15227678	8458045		0.646587	2.02316	8.53232
39694	10	41478.8	15182	0			6699.33	16123620	6789724		0.646587	2.13516	6.864
39695	10	41558.8	15182	0			6699.33	14896807	13117262		0.646587	1.9818	13.1915
39696	10	41638.8	15182	0			6699.33	16306524	9870935		0.646587	2.15802	9.94521
39697	10	41718.8	15182	0			6699.33	15503184	12391870		0.646587	2.0576	12.4661
39698	10	41798.8	15182	0			6699.33	15562491	11176048		0.646587	2.06502	11.2503
39699	10	41878.8	15182	0			6699.33	17914372	9238290		0.646587	2.359	9.31257
39700	10	41958.8	15182	0			78719.2	17344396	8902437		2.30814	2.28775	8.97671
39701	10	42038.8	15182	0			6699.33	16636334	12985494		0.646587	2.19925	13.0598
39702	10	42118.8	15182	0			6699.33	18210872	6.1035e+06		0.646587	2.39606	6.17778
39703	10	42198.8	15182	0			6699.33	16696351	10488658		0.646587	2.20675	10.5629
39704	10	42278.8	15182	0			6699.33	17234310	12039365		0.646587	2.27399	12.1136
39705	10	42358.8	15182	0			6699.33	18674656	8.32513e+06		0.646587	2.45404	8.39941
39706	10	42438.8	15182	0			6699.33	16965888	11516004		0.646587	2.24044	11.5903
39707	10	42518.8	15182	0			6699.33	17769306	10621211		0.646587	2.34087	10.6955
39708	10	42598.8	15182	0			6699.33	19016096	9323483		0.646587	2.49672	9.39776
39709	10	42678.8	15182	0			6699.33	17450274	9792523		0.646587	2.30099	9.8668
39710	10	42758.8	15182	0			6699.33	17426438	9567043		0.646587	2.29801	9.64132
39711	10	42838.8	15182	0			6699.33	18359598	9215738		0.646587	2.41465	9.29002
39712	10	42918.8	15182	0			6699.33	17518684	7.59766e+06		0.646587	2.30954	7.67194
39713	10	42998.8	15182	0			6699.33	17014758	10988857		0.646587	2.24655	11.0631
39714	10	43078.8	15182	0			6699.33	19010450	5.13298e+06		0.646587	2.49601	5.20726
39715	10	43158.8	15182	0			6699.33	15983378	9894618		0.646587	2.11763	9.96889
39716	10	43238.8	15182	0			6699.33	17460792	11547508		0.646587	2.3023	11.6218
39717	10	43318.8	15182	0			6699.33	17908974	6720162		0.646587	2.35833	6.79444
39718	10	43398.8	15182	0			6699.33	16155974	7145798		0.646587	2.1392	7.22007
39719	10	43478.8	15182	0			6699.33	17049700	7254785		0.646587	2.25092	7.32906
39720	10	43558.8	15182	0			6699.33	15901367	9914856		0.646587	2.10737	9.98913
39721	10	43638.8	15182	0			6699.33	15465099	8979750		0.646587	2.05284	9.05403
39722	10	43718.8	15182	0			6699.33	16313306	6.85179e+06		0.646587	2.15887	6.92607
39723	10	43798.8	15182	0			6699.33	16568518	9514694		0.646587	2.19077	9.58897
39724	10	43878.8	15182	0			74680.3	14730718	11456095		2.21496	1.96104	11.5304
39725	10	43958.8	15182	0			6699.33	14382519	14259139		0.646587	1.91752	14.3334
39726	10	44038.8	15182	0			68808.8	14196621	10541714		2.0795	1.89428	10.616
39727	10	44118.8	15182	0			6699.33	15060769	8.15523e+06		0.646587	2.0023	8.2295
39728	10	44198.8	15182	0			6699.33	13813131	6.94645e+06		0.646587	1.84635	7.02073
39729	10	44278.8	15182	0			6699.33	13487418	8164910		0.646587	1.80563	8.23919
39730	10	44358.8	15182	0			6699.33	13273265	10190512		0.646587	1.77886	10.2648
39731	10	44438.8	15182	0			6699.33	12921917	9446399		0.646587	1.73494	9.52068
39732	10	44518.8	15182	0			6699.33	13154891	5.80908e+06		0.646587	1.76407	5.88335
39733	10	44598.8	15182	0			6699.33	14119009	5.80313e+06		0.646587	1.88458	5.87741
39734	10	44678.8	15182	0			6699.33	12343051	9259925		0.646587	1.66259	9.3342
39735	10	44758.8	15182	0			6699.33	12471528	10880504		0.646587	1.67864	10.9548
39736	10	44838.8	15182	0			6699.33	13494430	9082035		0.646587	1.80651	9.15631
39737	10	44918.8	15182	0			6699.33	12851922	7400196		0.646587	1.72619	7.47447
39738	10	44998.8	15182	0			6699.33	13254460	7.2367e+06		0.646587	1.77651	7.31098
39739	10	45078.8	15182	0			6699.33	13693303	7700640		0.646587	1.83137	7.77492
39740	10	45158.8	15182	0			56897.6	11976596	5.14706e+06		1.8047	1.61678	5.22134
39741	10	45238.8	15182	0			6699.33	12624096	5.87474e+06		0.646587	1.69772	5.94902
39742	10	45318.8	15182	0			6699.33	13169867	4681511		0.646587	1.76594	4.75579
39743	10	45398.8	15182	0			77747.5	12083606	7614513		2.28572	1.63015	7.68879
39744	10	45478.8	15182	0			261056	12122220	10252363		6.51477	1.63498	10.3266
39745	10	45558.8	15182	0			257262	10920056	5.74308e+06		6.42725	1.48471	5.81735
39746	10	45638.8	15182	0			399580	14385577	1.43179e+06		9.71062	1.9179	1.50607
39747	10	45718.8	15182	0			213996	9001576	1.43182e+06		5.42908	1.2449	1.50609
39748	10	45798.8	15182	0			212404	7362692	637943		5.39234	1.04004	0.71222
39749	10	38998.8	15102	0			124201	6.4605e+06	5.75471e+06		3.35742	0.927267	5.82899
39750	10	39078.8	15102	0			6699.33	11446835	18582262		0.646587	1.55056	18.6565
39751	10	39158.8	15102	0			47329.5	13324308	17216260		1.58395	1.78524	17.2905
39752	10	39238.8	15102	0			6699.33	10694765	14518965		0.646587	1.45655	14.5932
39753	10	39318.8	15102	0			6699.33	11023695	14707490		0.646587	1.49767	14.7818
39754	10	39398.8	15102	0			6699.33	11580203	12706884		0.646587	1.56723	12.7812
39755	10	39478.8	15102	0			6699.33	12357344	9219166		0.646587	1.66437	9.29344
39756	10	39558.8	15102	0			6699.33	12219195	7947603		0.646587	1.6471	8.02188
39757	10	39638.8	15102	0			6699.33	12211466	10522309		0.646587	1.64614	10.5966
39758	10	39718.8	15102	0			6699.33	12709442	11806073		0.646587	1.70838	11.8803
39759	10	39798.8	15102	0			6699.33	11703493	8660500		0.646587	1.58264	8.73478
39760	10	39878.8	15102	0			6699.33	12197279	10940367		0.646587	1.64436	11.0146
39761	10	39958.8	15102	0			6699.33	12176500	11139090		0.646587	1.64177	11.2134
39762	10	40038.8	15102	0			6699.33	13320249	8484990		0.646587	1.78474	8.55927
39763	10	40118.8	15102	0			6699.33	12378987	9509147		0.646587	1.66708	9.58342
39764	10	40198.8	15102	0			6699.33	11485382	11252451		0.646587	1.55538	11.3267
39765	10	40278.8	15102	0			6699.33	14005382	7003633		0.646587	1.87038	7.07791
39766	10	40358.8	15102	0			6699.33	13274556	10184387		0.646587	1.77902	10.2587
39767	10	40438.8	15102	0			69384.4	12701020	5601229		2.09278	1.70733	5.67551
39768	10	40518.8	15102	0			6699.33	12841344	9364432		0.646587	1.72487	9.43871
39769	10	40598.8	15102	0			60917.8	13176731	9054749		1.89745	1.7668	9.12903
39770	10	40678.8	15102	0			6699.33	13710244	5.32766e+06		0.646587	1.83348	5.40194
39771	10	40758.8	15102	0			6699.33	13162767	9362163		0.646587	1.76505	9.43644
39772	10	40838.8	15102	0			6699.33	14860363	8982588		0.646587	1.97725	9.05687
39773	10	40918.8	15102	0			6699.33	12987401	9203622		0.646587	1.74313	9.2779
39774	10	40998.8	15102	0			6699.33	13503098	6.76506e+06		0.646587	1.80759	6.83934
39775	10	41078.8	15102	0			6699.33	13652349	9577332		0.646587	1.82625	9.65161
39776	10	41158.8	15102	0			6699.33	14957852	5625142		0.646587	1.98944	5.69942
39777	10	41238.8	15102	0			6699.33	14935178	6604816		0.646587	1.9866	6.67909
39778	10	41318.8	15102	0			6699.33	14396614	6.90128e+06		0.646587	1.91928	6.97555
39779	10	41398.8	15102	0			6699.33	14992411	6.71453e+06		0.646587	1.99376	6.78881
39780	10	41478.8	15102	0			6699.33	15724553	12251000		0.646587	2.08527	12.3253
39781	10	41558.8	15102	0			6699.33	14665077	7.73703e+06		0.646587	1.95284	7.8113
39782	10	41638.8	15102	0			6699.33	14556146	9872283		0.646587	1.93922	9.94656
39783	10	41718.8	15102	0			60604.4	16145927	12057975		1.89022	2.13794	12.1323
39784	10	41798.8	15102	0			6699.33	17171526	11738953		0.646587	2.26614	11.8132
39785	10	41878.8	15102	0			6699.33	15022730	10827339		0.646587	1.99755	10.9016
39786	10	41958.8	15102	0			6699.33	16188737	9546240		0.646587	2.1433	9.62052
39787	10	42038.8	15102	0			6699.33	15654556	9766669		0.646587	2.07652	9.84095
39788	10	42118.8	15102	0			6699.33	16729302	9588894		0.646587	2.21087	9.66317
39789	10	42198.8	15102	0			58943.8	16212251	8043164		1.85191	2.14624	8.11744
39790	10	42278.8	15102	0			6699.33	19091944	6561300		0.646587	2.5062	6.63558
39791	10	42358.8	15102	0			6699.33	15867559	7454002		0.646587	2.10315	7.52828
39792	10	42438.8	15102	0			6699.33	15682694	13803058		0.646587	2.08004	13.8773
39793	10	42518.8	15102	0			6699.33	18122340	10181881		0.646587	2.385	10.2562
39794	10	42598.8	15102	0			6699.33	17013460	9414188		0.646587	2.24639	9.48846
39795	10	42678.8	15102	0			6699.33	16741916	11945227		0.646587	2.21244	12.0195
39796	10	42758.8	15102	0			6699.33	17184250	10666205		0.646587	2.26774	10.7405
39797	10	42838.8	15102	0			6699.33	15796220	10120463		0.646587	2.09423	10.1947
39798	10	42918.8	15102	0			6699.33	17280068	9121368		0.646587	2.27971	9.19565
39799	10	42998.8	15102	0			6699.33	17558402	8636773		0.646587	2.3145	8.71105
39800	10	43078.8	15102	0			6699.33	16732525	9034859		0.646587	2.21127	9.10914
39801	10	43158.8	15102	0			6699.33	16976330	9627548		0.646587	2.24175	9.70182
39802	10	43238.8	15102	0			6699.33	15645710	8259509		0.646587	2.07542	8.33379
39803	10	43318.8	15102	0			6699.33	16496954	9506077		0.646587	2.18182	9.58035
39804	10	43398.8	15102	0			6699.33	17636434	9746013		0.646587	2.32426	9.82029
39805	10	43478.8	15102	0			6699.33	16369787	11705283		0.646587	2.16593	11.7796
39806	10	43558.8	15102	0			6699.33	17014226	7.28581e+06		0.646587	2.24648	7.36008
39807	10	43638.8	15102	0			6699.33	15923927	6.82913e+06		0.646587	2.11019	6.90341
39808	10	43718.8	15102	0			6699.33	15356843	6080462		0.646587	2.03931	6.15474
39809	10	43798.8	15102	0			6699.33	14920429	6.83401e+06		0.646587	1.98476	6.90829
39810	10	43878.8	15102	0			6699.33	15054848	7935639		0.646587	2.00156	8.00992
39811	10	43958.8	15102	0			6699.33	13927775	10871918		0.646587	1.86068	10.9462
39812	10	44038.8	15102	0			6699.33	14575197	10067277		0.646587	1.9416	10.1416
39813	10	44118.8	15102	0			6699.33	13897716	9774822		0.646587	1.85692	9.8491
39814	10	44198.8	15102	0			6699.33	13499932	8.14442e+06		0.646587	1.8072	8.2187
39815	10	44278.8	15102	0			6699.33	13012794	10630891		0.646587	1.7463	10.7052
39816	10	44358.8	15102	0			6699.33	12783821	9865947		0.646587	1.71768	9.94022
39817	10	44438.8	15102	0			6699.33	12492841	9537882		0.646587	1.68131	9.61216
39818	10	44518.8	15102	0			6699.33	13842713	9948903		0.646587	1.85004	10.0232
[truncated: 15,473 more rows]

## Sheet: calibration curve
Lactate +1 [mM]	Lactate+1
0	571.535
1	41849.2
2.5	117191
5	134307
7.5	262694
10	399283
15	671947
Glucose_Cl+6 (mM)	Glucose_Cl+6
0	2173.72
0.25	1.39429e+06
0.5	3.02925e+06
1	5174955
2.5	21940976
5	40894748
[mM]	Ascorbate_C6H8O6+1
0.25	107378
0	438.046
0.05	2460.54
0.1	5763.93
0.25	124778
0.5	597644
1	1.41302e+06
1.5	1.7945e+06

## Sheet: Abundance  vs concen ratio
x	y	z	Date	Abundance Ratio	Lactate / Glucose_Cl	Lactate / Ascorbate_C6H8O6	Glucose_Cl / Ascorbate_C6H8O6	Glucose_Cl / Lactate	Ascorbate_C6H8O6 / Lactate	Ascorbate_C6H8O6 / Glucose_Cl	Concentration Ratio	Q_Lactate_mM / Q_Glucose_Cl_mM	Q_Lactate_mM / Q_Ascorbate_C6H8O6_mM	Q_Glucose_Cl_mM / Q_Ascorbate_C6H8O6_mM	Q_Glucose_Cl_mM / Q_Lactate_mM	Q_Ascorbate_C6H8O6_mM / Q_Lactate_mM	Q_Ascorbate_C6H8O6_mM / Q_Glucose_Cl_mM
1958.79	17502	0			0.020908	0.460196	22.0102	47.828	2.17299	0.045433		3.88091	20.1127	5.18248	0.257672	0.0497197	0.192958
2038.79	17502	0			0.016701	0.427687	25.609	59.8779	2.33816	0.039049		3.15719	18.8592	5.97342	0.316737	0.0530245	0.167408
2118.79	17502	0			0.027384	1.02169	37.3092	36.5173	0.978774	0.026803		4.9734	39.9162	8.02594	0.20107	0.0250525	0.124596
2198.79	17502	0			0.023938	0.758865	31.7016	41.775	1.31776	0.031544		4.39343	31.1746	7.09572	0.227613	0.0320774	0.14093
1478.79	17422	0			0.021842	0.737145	33.7488	45.7831	1.35658	0.029631		4.03752	30.2264	7.48637	0.247677	0.0330837	0.133576
1558.79	17422	0			0.006875	0.076365	11.1077	145.456	13.095	0.090027		1.38361	3.86379	2.79255	0.722747	0.258813	0.358096
1638.79	17422	0			0.018297	0.346807	18.9541	54.6533	2.88345	0.052759		3.41811	15.7812	4.61694	0.292559	0.0633666	0.216594
1718.79	17422	0			0.028681	1.76524	61.5481	34.8667	0.566495	0.016247		5.17282	57.4753	11.111	0.193318	0.0173988	0.0900008
1798.79	17422	0			0.035606	1.52632	42.8663	28.0848	0.65517	0.023328		6.19273	48.87	7.89152	0.16148	0.0204624	0.126718
1878.79	17422	0			0.033205	1.81753	54.7361	30.1157	0.550198	0.018269		5.72158	47.3224	8.27087	0.174777	0.0211317	0.120906
1958.79	17422	0			0.000702	0.015712	22.3912	1425.07	63.6439	0.04466		0.492421	2.583	5.24551	2.03078	0.387147	0.190639
2038.79	17422	0			0.020694	0.459497	22.204	48.3224	2.17629	0.045037		3.84735	19.9741	5.19165	0.259919	0.0500649	0.192617
2118.79	17422	0			0.019339	1.06403	55.0192	51.7085	0.939825	0.018175		3.62471	37.3655	10.3086	0.275884	0.0267626	0.0970067
2198.79	17422	0			0.011698	0.249942	21.3657	85.4827	4.00093	0.046804		2.31305	11.746	5.07812	0.432329	0.0851356	0.196923
2278.79	17422	0			0.01341	0.56568	42.1832	74.5708	1.76778	0.023706		2.62817	22.8542	8.69585	0.380492	0.0437556	0.114997
2358.79	17422	0			0.019868	1.79495	90.3416	50.3311	0.55712	0.011069		3.71346	51.4823	13.8637	0.26929	0.0194242	0.0721309
2438.79	17422	0			0.026153	32.6275	1247.56	38.2365	0.030649	0.000802		4.74577	124.918	26.322	0.210714	0.00800524	0.0379911
2518.79	17422	0			0.031835	25.3	794.716	31.4117	0.039526	0.001258		5.58079	99.6169	17.85	0.179186	0.0100385	0.0560225
1478.79	17342	0			0.044249	25.7981	583.024	22.5995	0.038763	0.001715		7.29592	101.337	13.8895	0.137063	0.00986809	0.0719968
1558.79	17342	0			0.028387	1.93742	68.2502	35.2274	0.516151	0.014652		5.09426	56.0236	10.9974	0.196299	0.0178496	0.0909307
1638.79	17342	0			0.04892	41.0783	839.712	20.4417	0.024344	0.001191		8.2442	154.099	18.6918	0.121297	0.00648936	0.0534995
1718.79	17342	0			0.04474	21.3311	476.779	22.3513	0.04688	0.002097		7.21843	85.9125	11.9018	0.138534	0.0116398	0.0840208
1798.79	17342	0			0.079112	3.23529	40.8952	12.6404	0.309092	0.024453		12.6412	91.9329	7.27251	0.0791067	0.0108775	0.137504
1878.79	17342	0			0.040002	2.24062	56.0133	24.999	0.446304	0.017853		7.0371	72.8095	10.3465	0.142104	0.0137345	0.0966508
1958.79	17342	0			0.021851	0.797457	36.4958	45.7653	1.25399	0.0274		4.04206	30.3081	7.49819	0.247399	0.0329944	0.133365
2038.79	17342	0			0.030379	29.2062	961.406	32.9179	0.034239	0.00104		5.39403	113.105	20.9685	0.18539	0.00884137	0.0476906
2118.79	17342	0			0.023842	0.963696	40.4204	41.9431	1.03767	0.02474		4.37873	38.1647	8.71593	0.228377	0.0262022	0.114732
2198.79	17342	0			0.007974	0.149819	18.789	125.411	6.6747	0.053223		1.60781	7.37821	4.58898	0.621963	0.135534	0.217914
2278.79	17342	0			0.008713	0.150211	17.2406	114.776	6.65731	0.058003		1.73642	7.35697	4.23685	0.575896	0.135926	0.236025
2358.79	17342	0			0.003528	0.04608	13.0603	283.429	21.7015	0.076568		0.783708	2.5576	3.26346	1.27599	0.390992	0.306424
2438.79	17342	0			0.015025	0.390391	25.9827	66.5556	2.56153	0.038487		2.85882	17.4354	6.0988	0.349795	0.0573547	0.163967
2518.79	17342	0			0.028569	0.95314	33.3626	35.0028	1.04916	0.029974		5.15766	37.1691	7.20658	0.193886	0.0269041	0.138762
2598.79	17342	0			0.027531	21.9451	797.096	36.3222	0.045568	0.001255		4.91954	88.0327	17.8945	0.203271	0.0113594	0.0558831
1398.79	17262	0			0.058827	2.16087	36.7327	16.999	0.462776	0.027224		9.7136	67.9124	6.99148	0.102948	0.0147248	0.143031
1478.79	17262	0			0.021284	1.1109	52.1941	46.9835	0.900169	0.019159		3.9717	30.0178	7.55793	0.251781	0.0333135	0.132311
1558.79	17262	0			0.031042	10.3925	334.791	32.2148	0.096224	0.002987		5.20709	48.1418	9.24542	0.192046	0.020772	0.108162
1638.79	17262	0			0.118756	39.9883	336.726	8.42062	0.025007	0.00297		16.197	150.335	9.28163	0.0617397	0.00665182	0.10774
1718.79	17262	0			0.222011	55.2794	248.994	4.50428	0.01809	0.004016		26.5872	203.134	7.64029	0.037612	0.00492285	0.130885
1798.79	17262	0			0.011859	0.64452	54.3507	84.3275	1.55154	0.018399		2.40085	24.0748	10.0276	0.41652	0.0415372	0.0997245
1878.79	17262	0			0.004067	0.052021	12.7922	245.906	19.2231	0.078173		0.870534	2.78478	3.19894	1.14872	0.359094	0.312604
1958.79	17262	0			0.002332	0.026295	11.2753	428.799	38.0299	0.088689		0.545372	1.54336	2.82991	1.83361	0.647939	0.353368
2038.79	17262	0			0.009674	0.162535	16.8007	103.367	6.15253	0.059521		1.8697	7.76784	4.1546	0.534845	0.128736	0.240697
2118.79	17262	0			0.003531	0.042373	11.999	283.177	23.6	0.08334		0.766485	2.30456	3.00667	1.30466	0.433922	0.332594
2198.79	17262	0			0.007673	0.113265	14.7619	130.33	8.82883	0.067742		1.5204	5.57969	3.66988	0.657721	0.179222	0.272489
2278.79	17262	0			0.003829	0.052695	13.7625	261.171	18.977	0.072661		0.837148	2.87288	3.43175	1.19453	0.348082	0.291397
2358.79	17262	0			0.005669	0.08887	15.6778	176.412	11.2523	0.063784		1.16226	4.51848	3.88765	0.860389	0.221313	0.257225
2438.79	17262	0			0.007839	0.176999	22.5806	127.575	5.64976	0.044286		1.59312	8.63671	5.42126	0.6277	0.115785	0.184459
2518.79	17262	0			0.009933	0.354069	35.6473	100.679	2.82431	0.028053		1.98623	15.8242	7.96696	0.503466	0.0631942	0.125518
2598.79	17262	0			0.024338	20.1582	828.257	41.0879	0.049608	0.001207		4.43039	81.8623	18.4774	0.225714	0.0122156	0.05412
2678.79	17262	0			0.07696	32.0833	416.884	12.9938	0.031169	0.002399		11.4123	123.039	10.7813	0.0876245	0.00812748	0.0927535
1318.79	17182	0			0.230351	214.195	929.864	4.3412	0.004669	0.001075		36.8951	751.863	20.3784	0.0271038	0.00133003	0.0490716
1398.79	17182	0			0.031024	0.95031	30.6312	32.2328	1.05229	0.032646		5.6321	39.9356	7.09072	0.177554	0.0250403	0.141029
1478.79	17182	0			0.073857	3.98955	54.0172	13.5396	0.250655	0.018513		12.4957	122.232	9.78198	0.0800278	0.00818114	0.102229
1558.79	17182	0			0.077741	31.1619	400.843	12.8633	0.03209	0.002495		11.4355	119.858	10.4812	0.0874468	0.00834323	0.0954092
1638.79	17182	0			0.044381	17.7758	400.526	22.5321	0.056256	0.002497		7.02954	73.6361	10.4752	0.142257	0.0135803	0.0954633
1718.79	17182	0			0.035037	2.05277	58.5885	28.5412	0.487147	0.017068		5.97689	50.4089	8.43396	0.167311	0.0198378	0.118568
1798.79	17182	0			0.022239	1.0211	45.9144	44.9659	0.979341	0.02178		4.10503	39.1343	9.53325	0.243603	0.025553	0.104896
1878.79	17182	0			0.003053	0.031429	10.2958	327.584	31.8173	0.097127		0.677483	1.75517	2.59073	1.47605	0.569745	0.385992
1958.79	17182	0			0.004524	0.053691	11.867	221.023	18.6249	0.084267		0.932852	2.77414	2.97382	1.07198	0.360472	0.336267
2038.79	17182	0			0.003776	0.051012	13.5078	264.797	19.6032	0.074031		0.814819	2.74709	3.3714	1.22727	0.364022	0.296612
2118.79	17182	0			9.31615	0.028176	0.003024	0.10734	35.4908	330.638		16.93	1.66109	0.0981156	0.0590668	0.602013	10.1921
2198.79	17182	0			8.04024	0.029324	0.003647	0.124374	34.1015	274.184		15.17	1.78378	0.117586	0.0659194	0.560607	8.50443
2278.79	17182	0			0.013218	0.447142	33.8282	75.6542	2.23643	0.029561		2.51539	19.8132	7.87681	0.397553	0.0504713	0.126955
2358.79	17182	0			0.01084	0.321062	29.6187	92.2521	3.11466	0.033763		2.12418	14.6185	6.88197	0.47077	0.0684063	0.145307
2438.79	17182	0			0.016262	0.44512	27.3722	61.494	2.24658	0.036533		3.07673	19.5613	6.35782	0.325021	0.0511214	0.157286
2518.79	17182	0			0.012504	0.832273	66.5619	79.976	1.20153	0.015024		2.47133	29.8495	12.0783	0.404641	0.0335014	0.0827928
2598.79	17182	0			0.029451	1.91821	65.1318	33.9544	0.521318	0.015353		5.2222	51.4509	9.85234	0.19149	0.019436	0.101499
2678.79	17182	0			0.061211	20.9911	342.929	16.3369	0.047639	0.002916		9.01695	84.7385	9.39768	0.110902	0.011801	0.106409
2758.79	17182	0			0.054106	23.7817	439.539	18.4822	0.042049	0.002275		8.42244	94.3743	11.2051	0.11873	0.0105961	0.089245
2838.79	17182	0			0.025097	20.9349	834.151	39.845	0.047767	0.001199		4.54839	84.5443	18.5877	0.219858	0.0118281	0.0537989
1318.79	17102	0			0.008518	0.112256	13.1786	117.398	8.90822	0.07588		1.67512	5.51399	3.2917	0.596972	0.181357	0.303795
1398.79	17102	0			0.003413	0.039255	11.5002	292.96	25.4744	0.086955		0.74635	2.15356	2.88546	1.33985	0.464347	0.346565
1478.79	17102	0			0.008227	0.127604	15.5099	121.547	7.83672	0.064475		1.60134	6.16915	3.85248	0.624475	0.162097	0.259573
1558.79	17102	0			0.039444	1.83461	46.5119	25.3524	0.545074	0.0215		7.09589	71.6571	10.0984	0.140927	0.0139554	0.0990256
1638.79	17102	0			0.029735	1.36473	45.8965	33.6305	0.732746	0.021788		5.40645	53.8671	9.96349	0.184964	0.0185642	0.100366
1718.79	17102	0			0.003432	0.045553	13.273	291.373	21.9523	0.075341		0.791517	2.62293	3.3138	1.2634	0.381253	0.301769
1798.79	17102	0			0.005559	0.077657	13.9708	179.904	12.8772	0.071578		1.13645	3.95741	3.48226	0.879934	0.25269	0.28717
1878.79	17102	0			0.003223	0.035366	10.9722	310.244	28.2755	0.09114		0.714141	1.96887	2.75697	1.40028	0.507906	0.362716
1958.79	17102	0			0.0078	0.162856	20.8787	128.204	6.1404	0.047896		1.55176	7.8944	5.08737	0.644428	0.126672	0.196565
2038.79	17102	0			0.013184	0.829474	62.916	75.8505	1.20558	0.015894		2.55251	31.4683	12.3284	0.391771	0.031778	0.0811137
2118.79	17102	0			0.0146	0.699408	47.9031	68.4909	1.42978	0.020875		2.7738	28.8445	10.3989	0.360517	0.0346686	0.0961636
2198.79	17102	0			0.014432	0.661659	45.8468	69.2907	1.51135	0.021812		2.75321	27.2452	9.89581	0.363213	0.0367037	0.101053
2278.79	17102	0			0.019356	0.69517	35.9151	51.6638	1.4385	0.027843		3.60235	29.4232	8.1678	0.277597	0.0339867	0.122432
2358.79	17102	0			0.009562	0.181197	18.9503	104.584	5.51885	0.05277		1.85554	8.63376	4.65297	0.538928	0.115824	0.214916
2438.79	17102	0			0.006069	0.079067	13.0288	164.783	12.6476	0.076753		1.27087	4.13729	3.25547	0.786862	0.241704	0.307175
2518.79	17102	0			0.010919	0.248485	22.7563	91.58	4.02438	0.043944		2.16929	11.6844	5.38628	0.460981	0.0855842	0.185657
2598.79	17102	0			0.018526	19.4483	1049.77	53.9774	0.051418	0.000953		3.51041	79.411	22.6216	0.284867	0.0125927	0.0442056
2678.79	17102	0			0.055832	30.0016	537.355	17.9109	0.033332	0.001861		8.88764	115.851	13.0351	0.112516	0.00863175	0.0767159
2758.79	17102	0			0.048194	26.0044	539.577	20.7495	0.038455	0.001853		7.8039	102.049	13.0767	0.128141	0.00979921	0.0764721
2838.79	17102	0			0.053148	33.3649	627.772	18.8153	0.029972	0.001593		8.65536	127.465	14.7267	0.115535	0.00784531	0.067904
2918.79	17102	0			0.01533	0.265686	17.3309	65.2305	3.76384	0.057701		2.89271	12.3237	4.26027	0.345697	0.0811442	0.234727
2998.79	17102	0			0.068389	1.97409	28.8656	14.6223	0.506564	0.034643		12.143	81.9148	6.74585	0.082352	0.0122078	0.148239
3078.79	17102	0			0.133777	1.75947	13.1523	7.47515	0.568352	0.076032		22.5776	74.0837	3.2813	0.0442918	0.0134982	0.304758
3158.79	17102	0			0.029662	0.475163	16.0195	33.7137	2.10454	0.062424		5.41848	21.4864	3.96538	0.184554	0.0465412	0.252182
1238.79	17022	0			0.044339	2.34167	52.8125	22.5533	0.427045	0.018935		7.88612	84.9223	10.7686	0.126805	0.0117755	0.0928627
1318.79	17022	0			0.010923	0.234058	21.4284	91.5514	4.27244	0.046667		2.1221	10.9993	5.18322	0.471232	0.0909149	0.19293
1398.79	17022	0			0.006971	0.104331	14.9662	143.448	9.58484	0.066817		1.38454	5.15158	3.72079	0.722263	0.194115	0.26876
1478.79	17022	0			0.004005	0.050132	12.5186	249.711	19.9473	0.079881		0.86274	2.70295	3.13298	1.1591	0.369967	0.319185
1558.79	17022	0			0.004863	0.079096	16.2638	205.621	12.6429	0.061486		1.03969	4.179	4.01947	0.961828	0.239292	0.248789
1638.79	17022	0			0.006884	0.103483	15.0313	145.254	9.66345	0.066528		1.38064	5.15507	3.73383	0.724302	0.193984	0.267822
1718.79	17022	0			0.007241	0.122138	16.8672	138.1	8.18747	0.059287		1.43739	5.99398	4.17003	0.695703	0.166834	0.239806
1798.79	17022	0			0.003623	0.050623	13.9709	275.979	19.7538	0.071577		0.785432	2.73554	3.48285	1.27318	0.365558	0.287121
1878.79	17022	0			0.007888	0.265589	33.6693	126.772	3.76521	0.029701		1.61838	12.3993	7.66156	0.617904	0.0806499	0.130522
1958.79	17022	0			0.023848	1.13294	47.5069	41.9324	0.88266	0.02105		4.38017	43.4692	9.92409	0.228302	0.0230048	0.100765
2038.79	17022	0			0.015275	1.87618	122.828	65.467	0.532997	0.008141		2.9401	50.2035	17.0755	0.340125	0.0199189	0.0585636
2118.79	17022	0			0.019195	1.11193	57.9272	52.096	0.899336	0.017263		3.58784	40.6809	11.3385	0.278719	0.0245815	0.0881947
2198.79	17022	0			0.01606	0.477542	29.7351	62.267	2.09406	0.03363		3.02435	21.0378	6.95613	0.330649	0.0475335	0.143758
2278.79	17022	0			0.003774	0.050933	13.4965	264.983	19.6335	0.074093		0.806857	2.71832	3.36902	1.23938	0.367874	0.296822
2358.79	17022	0			0.001814	0.020096	11.0792	551.323	49.7619	0.090259		0.460263	1.28083	2.78281	2.17267	0.780747	0.359349
2438.79	17022	0			0.92907	1.11506	1.20018	1.07635	0.896816	0.833205		5.36118	16.1073	3.00443	0.186526	0.0620837	0.332842
2518.79	17022	0			0.01105	0.448154	40.5553	90.494	2.23137	0.024658		2.18401	19.2603	8.81877	0.457874	0.0519204	0.113394
2598.79	17022	0			0.03698	2.04832	55.3894	27.0414	0.488205	0.018054		6.54038	67.2898	10.2884	0.152896	0.0148611	0.0971972
2678.79	17022	0			0.011524	0.468339	40.6394	86.7733	2.1352	0.024607		2.25938	20.0715	8.88364	0.442599	0.0498218	0.112566
2758.79	17022	0			0.025464	1.27579	50.1016	39.271	0.783827	0.019959		4.64673	46.1976	9.94197	0.215205	0.0216461	0.100584
2838.79	17022	0			0.045234	35.4011	782.628	22.1075	0.028248	0.001278		7.63147	134.496	17.6238	0.131036	0.00743519	0.0567414
2918.79	17022	0			0.017298	0.426338	24.6472	57.8115	2.34555	0.040572		3.24953	18.9503	5.83169	0.307737	0.0527697	0.171477
2998.79	17022	0			0.016434	0.199163	12.1189	60.849	5.02102	0.082516		3.08485	9.37322	3.03846	0.324165	0.106687	0.329114
3078.79	17022	0			0.055318	1.77683	32.1204	18.0774	0.5628	0.031133		9.90927	74.1261	7.48048	0.100916	0.0134905	0.133681
3158.79	17022	0			0.055288	3.02483	54.7101	18.087	0.330597	0.018278		9.74378	107.034	10.9849	0.10263	0.00934278	0.091034
1238.79	16942	0			0.007934	0.119294	15.036	126.041	8.38263	0.066507		1.57114	5.86655	3.73395	0.636481	0.170458	0.267813
1318.79	16942	0			0.010943	0.262652	24.0011	91.3799	3.80732	0.041665		2.12258	12.2183	5.75636	0.471125	0.0818443	0.173721
1398.79	16942	0			0.024757	1.01096	40.8345	40.3918	0.989159	0.024489		4.54709	41.9993	9.23652	0.219921	0.0238099	0.108266
1478.79	16942	0			0.029186	1.85224	63.464	34.2634	0.539888	0.015757		5.28199	63.4062	12.0042	0.189322	0.0157713	0.083304
1558.79	16942	0			0.009886	0.305558	30.9072	101.15	3.2727	0.032355		2.03386	13.9335	6.85074	0.491675	0.0717696	0.14597
1638.79	16942	0			0.032205	3.29469	102.303	31.0511	0.303519	0.009775		5.73774	82.4467	14.3692	0.174285	0.012129	0.0695933
1718.79	16942	0			0.041975	3.30464	78.7294	23.8239	0.302605	0.012702		7.39816	97.7313	13.2102	0.135169	0.0102321	0.075699
1798.79	16942	0			0.051171	3.54031	69.1858	19.5423	0.282461	0.014454		9.03057	116.672	12.9196	0.110735	0.00857106	0.0774015
1878.79	16942	0			0.012876	1.56601	121.618	77.6613	0.638565	0.008222		2.5569	41.4132	16.1966	0.391098	0.0241469	0.0617412
1958.79	16942	0			0.02489	31.8571	1279.91	40.1768	0.03139	0.000781		4.5403	122.258	26.9273	0.22025	0.00817942	0.037137
2038.79	16942	0			0.01761	1.84386	104.706	56.7864	0.54234	0.009551		3.36074	45.931	13.6669	0.297554	0.0217718	0.0731693
2118.79	16942	0			0.016637	1.5733	94.5654	60.1064	0.635607	0.010575		3.15287	49.6612	15.7511	0.317172	0.0201364	0.0634876
2198.79	16942	0			0.92907	1.11506	1.20018	1.07635	0.896816	0.833205		5.36118	16.1073	3.00443	0.186526	0.0620837	0.332842
2278.79	16942	0			0.002337	0.031841	13.6247	427.904	31.4065	0.073396		0.575001	1.95422	3.39864	1.73913	0.511712	0.294235
2358.79	16942	0			0.009957	0.238037	23.9074	100.436	4.20103	0.041828		1.9378	11.1617	5.76001	0.51605	0.0895918	0.173611
2438.79	16942	0			0.003552	0.08217	23.1332	281.526	12.1698	0.043228		0.830867	4.61901	5.55926	1.20356	0.216497	0.17988
2518.79	16942	0			0.005285	0.203949	38.5882	189.205	4.90318	0.025915		1.16708	10.0364	8.59954	0.856839	0.0996377	0.116285
2598.79	16942	0			0.009345	0.240938	25.7822	107.008	4.15045	0.038786		1.83347	11.3029	6.16476	0.545413	0.0884726	0.162212
2678.79	16942	0			0.002662	0.029993	11.2683	375.699	33.3411	0.088744		0.613841	1.73665	2.82916	1.62909	0.57582	0.353462
2758.79	16942	0			11.3213	0.046872	0.00414	0.088329	21.3347	241.538		19.6958	2.61617	0.132829	0.0507721	0.382238	7.5285
2838.79	16942	0			0.019106	1.01968	53.3687	52.3386	0.980698	0.018738		3.55849	40.488	11.3778	0.281018	0.0246987	0.0878902
2918.79	16942	0			0.00635	0.083811	13.1992	157.488	11.9316	0.075762		1.33242	4.39103	3.29553	0.750515	0.227737	0.303441
2998.79	16942	0			0.020904	0.396134	18.9498	47.8369	2.5244	0.052771		3.87188	17.8879	4.61996	0.258273	0.0559036	0.216452
3078.79	16942	0			0.029571	1.16745	39.4799	33.8173	0.85657	0.025329		5.3822	47.6179	8.84728	0.185797	0.0210005	0.113029
3158.79	16942	0			0.042634	2.53132	59.3738	23.4557	0.395051	0.016842		7.62609	91.827	12.0412	0.131129	0.01089	0.0830484
1158.79	16862	0			0.062531	2.77416	44.3646	15.9921	0.360469	0.02254		10.6972	92.8931	8.68386	0.0934823	0.0107651	0.115156
1238.79	16862	0			0.014484	0.37177	25.6685	69.0441	2.68983	0.038958		2.76107	16.7056	6.05041	0.362179	0.0598602	0.165278
1318.79	16862	0			0.009267	0.155228	16.7511	107.913	6.44213	0.059698		1.83194	7.55716	4.12521	0.545868	0.132325	0.242412
1398.79	16862	0			0.004926	0.065285	13.2538	203.015	15.3175	0.07545		1.03542	3.42702	3.30979	0.965793	0.291798	0.302134
1478.79	16862	0			0.026601	1.41056	53.0272	37.5931	0.70894	0.018858		4.85529	53.1345	10.9436	0.205961	0.0188202	0.0913774
1558.79	16862	0			0.016337	0.520923	31.8866	61.2119	1.91967	0.031361		3.10494	22.0853	7.11297	0.322068	0.0452789	0.140588
1638.79	16862	0			0.013236	0.410711	31.0292	75.55	2.4348	0.032228		2.55349	18.1187	7.09567	0.391622	0.0551916	0.140931
1718.79	16862	0			0.004807	0.076617	15.9398	208.045	13.0519	0.062736		1.00434	3.96815	3.951	0.995677	0.252006	0.253101
1798.79	16862	0			0.008639	0.15591	18.0475	115.755	6.41395	0.055409		1.68009	7.47856	4.45128	0.595206	0.133716	0.224654
1878.79	16862	0			0.0061	0.087894	14.4085	163.93	11.3773	0.069403		1.24857	4.47589	3.58481	0.800915	0.223419	0.278955
1958.79	16862	0			0.004146	0.063548	15.3291	241.22	15.7362	0.065236		0.87851	3.34525	3.80787	1.13829	0.298931	0.262614
2038.79	16862	0			0.018348	1.09728	59.8049	54.5029	0.911344	0.016721		3.43727	40.9203	11.9049	0.290929	0.0244378	0.0839991
2118.79	16862	0			0.026754	1.85142	69.2018	37.3777	0.540127	0.01445		4.86386	60.5134	12.4414	0.205598	0.0165253	0.0803765
2198.79	16862	0			0.033401	2.10643	63.064	29.9388	0.474737	0.015857		6.00459	72.6326	12.0962	0.166539	0.0137679	0.0826708
2278.79	16862	0			0.00751	0.658692	87.7031	133.147	1.51816	0.011402		1.58053	24.5086	15.5066	0.6327	0.0408021	0.0644888
2358.79	16862	0			0.006734	1.12936	167.715	148.505	0.885461	0.005962		1.44942	32.5829	22.48	0.689932	0.030691	0.0444841
2438.79	16862	0			0.000517	0.029866	57.8077	1935.55	33.4826	0.017299		0.371481	4.33096	11.6587	2.69193	0.230896	0.0857732
2518.79	16862	0			0.01126	0.52294	46.4418	88.809	1.91227	0.021532		2.21383	21.9008	9.89274	0.451706	0.0456604	0.101084
2598.79	16862	0			0.003599	0.065024	18.0665	277.843	15.3789	0.055351		0.826927	3.66549	4.43267	1.2093	0.272815	0.225598
2678.79	16862	0			0.004932	0.070542	14.3023	202.747	14.1759	0.069919		1.0298	3.66716	3.56103	0.971059	0.272691	0.280818
2758.79	16862	0			0.006251	0.060628	9.69882	159.971	16.4939	0.103105		1.25392	3.06613	2.44523	0.797497	0.326144	0.408959
2838.79	16862	0			0.005076	0.067243	13.2476	197.011	14.8715	0.075486		1.06749	3.53141	3.30814	0.936776	0.283173	0.302285
2918.79	16862	0			0.008676	0.197191	22.7281	115.26	5.07123	0.043998		1.74773	9.50739	5.43986	0.572172	0.105181	0.183828
2998.79	16862	0			0.013817	0.914922	66.2174	72.3749	1.09299	0.015102		2.67244	33.4085	12.5011	0.37419	0.0299325	0.0799928
3078.79	16862	0			0.016658	0.932677	55.991	60.0326	1.07218	0.01786		3.15434	35.1017	11.128	0.317023	0.0284887	0.089863
3158.79	16862	0			0.028245	0.49792	17.6285	35.4043	2.00835	0.056726		5.16358	22.3873	4.33561	0.193664	0.0446682	0.230648
3238.79	16862	0			0.090412	2.82255	31.2188	11.0605	0.354289	0.032032		15.8315	112.667	7.11664	0.063165	0.00887568	0.140516
1158.79	16782	0			0.090146	2.5604	28.4028	11.0931	0.390563	0.035208		13.7546	76.4888	5.56097	0.0727031	0.0130738	0.179825
1238.79	16782	0			0.032574	19.5529	600.263	30.6994	0.051143	0.001666		5.61303	79.7724	14.212	0.178157	0.0125357	0.070363
1318.79	16782	0			0.026761	23.3212	871.455	37.3674	0.042879	0.001148		4.81105	92.7842	19.2856	0.207855	0.0107777	0.0518521
1398.79	16782	0			0.011463	0.492094	42.9281	87.2356	2.03213	0.023295		2.25324	20.8353	9.24682	0.443806	0.0479955	0.108145
1478.79	16782	0			0.010279	0.181247	17.6329	97.2869	5.51734	0.056712		2.01926	8.72437	4.32058	0.495231	0.114621	0.231451
1558.79	16782	0			0.002569	0.024641	9.58996	389.185	40.5825	0.104276		0.603949	1.46132	2.4196	1.65577	0.684314	0.413291
1638.79	16782	0			0.002177	0.023601	10.8416	459.368	42.3708	0.092237		0.518849	1.41339	2.72409	1.92734	0.707519	0.367095
1718.79	16782	0			0.003034	0.035665	11.7537	329.559	28.0388	0.08508		0.661915	1.94993	2.94589	1.51077	0.512839	0.339456
1798.79	16782	0			0.00503	0.066055	13.132	198.802	15.1388	0.07615		1.03866	3.4077	3.28088	0.962783	0.293453	0.304796
1878.79	16782	0			0.004629	0.053791	11.6214	216.046	18.5904	0.086048		0.956638	2.78801	2.91438	1.04533	0.358679	0.343126
1958.79	16782	0			0.002422	0.027191	11.2285	412.95	36.7771	0.089059		0.556128	1.56714	2.81795	1.79815	0.638103	0.354867
2038.79	16782	0			0.92907	1.11506	1.20018	1.07635	0.896816	0.833205		5.36118	16.1073	3.00443	0.186526	0.0620837	0.332842
2118.79	16782	0			0.019018	0.879302	46.2349	52.5814	1.13727	0.021629		3.5598	33.8902	9.52026	0.280915	0.0295071	0.105039
2198.79	16782	0			0.020157	1.83195	90.8828	49.6098	0.545866	0.011003		3.76213	51.8672	13.7867	0.265807	0.01928	0.0725339
2278.79	16782	0			0.005857	0.85213	145.492	170.739	1.17353	0.006873		1.37428	25.0465	18.2251	0.727652	0.0399257	0.0548692
2358.79	16782	0			0.01678	1.37261	81.8023	59.5962	0.728539	0.012225		3.19761	42.7145	13.3583	0.312734	0.0234112	0.07486
2438.79	16782	0			0.010769	0.76435	70.9795	92.8626	1.3083	0.014089		2.16139	28.0154	12.9618	0.462666	0.0356947	0.0771501
2518.79	16782	0			0.009006	0.379261	42.1135	111.041	2.63671	0.023745		1.82802	16.684	9.12684	0.547041	0.0599376	0.109567
2598.79	16782	0			0.008737	0.350513	40.1197	114.46	2.85296	0.024925		1.77377	15.656	8.82639	0.563769	0.0638731	0.113297
2678.79	16782	0			0.008452	0.228028	26.9803	118.32	4.38544	0.037064		1.69871	10.8147	6.36643	0.588683	0.0924667	0.157074
2758.79	16782	0			0.003844	0.039828	10.3614	260.155	25.1081	0.096512		0.850719	2.22178	2.61165	1.17548	0.45009	0.3829
2838.79	16782	0			0.006539	0.084249	12.8844	152.932	11.8695	0.077613		1.34817	4.34275	3.2212	0.741744	0.230269	0.310443
2918.79	16782	0			0.009412	0.444977	47.2786	106.25	2.24731	0.021151		1.92921	18.7537	9.7209	0.518346	0.0533228	0.102871
2998.79	16782	0			0.020547	1.82541	88.8419	48.6694	0.547821	0.011256		3.82834	50.9608	13.3115	0.26121	0.0196229	0.0751231
3078.79	16782	0			0.016757	1.25906	75.1356	59.6758	0.794241	0.013309		3.23888	35.9352	11.095	0.308749	0.0278278	0.0901309
3158.79	16782	0			0.028533	0.946403	33.1693	35.0477	1.05663	0.030148		5.19623	39.3465	7.57212	0.192447	0.0254152	0.132063
3238.79	16782	0			0.108234	2.61361	24.1478	9.23923	0.382612	0.041412		18.4269	102.503	5.56271	0.0542685	0.00975577	0.179769
1158.79	16702	0			0.074339	1.53722	20.6786	13.4519	0.650523	0.048359		10.8793	47.7221	4.3865	0.0919176	0.0209546	0.227972
1238.79	16702	0			0.02343	9.22994	393.943	42.681	0.108343	0.002538		4.26269	44.1276	10.3521	0.234594	0.0226615	0.096599
1318.79	16702	0			0.085098	4.58462	53.8746	11.7512	0.21812	0.018562		14.0249	129.303	9.21956	0.0713018	0.00773375	0.108465
1398.79	16702	0			0.017245	1.97865	114.737	57.9877	0.505396	0.008716		3.28722	49.9184	15.1856	0.304209	0.0200327	0.0658518
1478.79	16702	0			0.021522	0.659118	30.6254	46.4642	1.51718	0.032653		3.97948	28.4131	7.13989	0.251289	0.0351951	0.140058
1558.79	16702	0			0.004571	0.049105	10.7429	218.774	20.3645	0.093085		0.96038	2.59477	2.70182	1.04125	0.38539	0.370121
1638.79	16702	0			0.002211	0.022899	10.3552	452.203	43.6692	0.09657		0.518159	1.3493	2.60403	1.92991	0.741125	0.384021
1718.79	16702	0			0.002049	0.016387	7.99843	488.109	61.0256	0.125025		0.507509	1.02835	2.02627	1.97041	0.972431	0.493517
1798.79	16702	0			0.020988	0.694914	33.1102	47.6465	1.43903	0.030202		3.88378	30.1259	7.75686	0.257481	0.033194	0.128918
1878.79	16702	0			0.015985	0.579787	36.2696	62.5568	1.72477	0.027571		3.00933	24.9842	8.30225	0.3323	0.0400252	0.120449
1958.79	16702	0			0.019655	0.737626	37.5283	50.8772	1.3557	0.026647		3.6488	31.5917	8.65812	0.274063	0.0316539	0.115498
2038.79	16702	0			0.92907	0.006556	0.007057	1.07635	152.522	141.704		5.36118	1.17983	0.220068	0.186526	0.847583	4.54405
2118.79	16702	0			0.017179	1.24937	72.7258	58.2102	0.800407	0.01375		3.23164	45.1592	13.9741	0.30944	0.0221439	0.0715611
2198.79	16702	0			0.019471	2.20398	113.191	51.3573	0.453724	0.008835		3.65297	54.6466	14.9595	0.27375	0.0182994	0.0668472
2278.79	16702	0			0.012041	10.9237	907.197	83.0484	0.091544	0.001102		2.50453	49.9761	19.9543	0.399277	0.0200096	0.0501145
2358.79	16702	0			0.030963	34.1101	1101.65	32.2969	0.029317	0.000908		5.51188	130.038	23.5922	0.181426	0.00769009	0.0423868
2438.79	16702	0			0.025256	2.1725	86.0195	39.5947	0.460299	0.011625		4.6013	61.1414	13.2878	0.21733	0.0163555	0.0752568
2518.79	16702	0			0.009287	1.30214	140.212	107.678	0.767965	0.007132		1.95153	34.5724	17.7155	0.512418	0.0289248	0.0564477
2598.79	16702	0			0.011463	0.476615	41.5767	87.2334	2.09813	0.024052		2.23949	20.4549	9.13374	0.446531	0.048888	0.109484
2678.79	16702	0			0.016413	0.462059	28.1515	60.9262	2.16423	0.035522		3.09383	20.3378	6.57367	0.323224	0.0491695	0.152122
2758.79	16702	0			0.009747	0.179754	18.442	102.596	5.56315	0.054224		1.92084	8.65951	4.50818	0.520605	0.11548	0.221819
2838.79	16702	0			0.011641	0.442098	37.9782	85.9046	2.26194	0.026331		2.28621	19.0982	8.35365	0.437406	0.052361	0.119708
2918.79	16702	0			0.015528	1.57334	101.323	64.3999	0.635592	0.009869		2.98526	45.6164	15.2805	0.334979	0.0219219	0.0654427
2998.79	16702	0			0.01674	18.343	1095.76	59.7371	0.054517	0.000913		3.21926	75.5945	23.482	0.310631	0.0132285	0.0425858
3078.79	16702	0			0.049721	45.5245	915.602	20.1123	0.021966	0.001092		8.42555	169.451	20.1116	0.118687	0.00590141	0.0497226
3158.79	16702	0			0.021187	1.66379	78.5289	47.1989	0.601038	0.012734		3.93218	49.6486	12.6262	0.254312	0.0201415	0.0792002
3238.79	16702	0			0.033578	1.19711	35.6519	29.7816	0.835344	0.028049		6.09008	49.7668	8.17177	0.164201	0.0200937	0.122372
1158.79	16622	0			0.178195	93.9696	527.34	5.61181	0.010642	0.001896		26.2093	336.73	12.8477	0.0381544	0.00296974	0.0778347
1238.79	16622	0			0.107188	74.198	692.223	9.3294	0.013477	0.001445		16.8498	268.459	15.9325	0.0593477	0.00372496	0.0627649
1318.79	16622	0			0.013845	1.34567	97.1957	72.2287	0.743126	0.010289		2.71587	39.3941	14.5051	0.368205	0.0253845	0.0689411
1398.79	16622	0			0.006045	0.071496	11.828	165.437	13.9868	0.084545		1.22984	3.64815	2.96635	0.813113	0.274112	0.337114
1478.79	16622	0			0.92907	0.003683	0.003964	1.07635	271.516	252.257		5.36118	0.683044	0.127406	0.186526	1.46403	7.84895
1558.79	16622	0			0.003074	0.033607	10.9331	325.325	29.756	0.091466		0.685183	1.88231	2.74716	1.45946	0.531263	0.364013
1638.79	16622	0			0.005872	0.091729	15.6224	170.31	10.9017	0.064011		1.18857	4.60826	3.87715	0.841348	0.217002	0.257921
1718.79	16622	0			0.002398	0.025829	10.7729	417.094	38.7167	0.092825		0.560005	1.51621	2.7075	1.7857	0.659539	0.369345
1798.79	16622	0			0.005403	0.069676	12.8947	185.067	14.3521	0.077551		1.12014	3.61096	3.22366	0.892744	0.276935	0.310206
1878.79	16622	0			0.017101	0.687588	40.2076	58.4763	1.45436	0.024871		3.21243	28.7094	8.93696	0.31129	0.0348318	0.111895
1958.79	16622	0			8.17764	0.730875	0.089375	0.122285	1.36822	11.1888		15.3596	23.9091	1.55663	0.0651061	0.0418251	0.642415
2038.79	16622	0			0.008001	0.840843	105.092	124.984	1.18928	0.009515		1.73121	26.8972	15.5367	0.577632	0.0371786	0.0643638
2118.79	16622	0			0.011866	1.04822	88.3374	84.2737	0.953998	0.01132		2.40983	31.8747	13.227	0.414968	0.0313729	0.0756031
2198.79	16622	0			0.0168	1.11854	66.5783	59.5226	0.894023	0.01502		3.20926	36.9042	11.4993	0.311599	0.0270972	0.0869618
2278.79	16622	0			0.013876	14.7373	1062.04	72.0643	0.067855	0.000942		2.7633	63.1444	22.8511	0.361887	0.0158367	0.0437616
2358.79	16622	0			0.001285	1.11506	867.999	778.436	0.896816	0.001152		0.838006	16.1073	19.221	1.19331	0.0620837	0.0520265
2438.79	16622	0			6.77539	8.13171	1.20018	0.147593	0.122975	0.833205		13.4253	40.3355	3.00443	0.074486	0.0247921	0.332842
2518.79	16622	0			0.020136	1.3907	69.0658	49.6625	0.719061	0.014479		3.75481	45.503	12.1186	0.266325	0.0219766	0.0825179
2598.79	16622	0			0.009794	0.244322	24.947	102.107	4.09296	0.040085		1.90271	11.4254	6.00479	0.525565	0.0875243	0.166534
2678.79	16622	0			0.003884	0.052439	13.5031	257.499	19.0697	0.074057		0.822335	2.77193	3.3708	1.21605	0.36076	0.296665
2758.79	16622	0			0.002403	0.021818	9.08013	416.174	45.8336	0.110131		0.575426	1.32028	2.29445	1.73784	0.757413	0.435835
2838.79	16622	0			0.008397	0.137397	16.3634	119.096	7.27816	0.061112		1.6923	6.82072	4.03044	0.590911	0.146612	0.248112
2918.79	16622	0			0.010193	0.464799	45.5991	98.1049	2.15147	0.02193		2.05014	19.6044	9.5625	0.487773	0.0510089	0.104575
2998.79	16622	0			0.008976	9.48251	1056.4	111.405	0.105457	0.000947		1.97839	44.9997	22.7456	0.505461	0.0222224	0.0439645
3078.79	16622	0			0.054292	40.0906	738.419	18.4188	0.024944	0.001354		8.97128	150.688	16.7967	0.111467	0.00663623	0.0595354
3158.79	16622	0			0.01686	1.58595	94.0647	59.3112	0.630536	0.010631		3.23536	42.7684	13.219	0.309084	0.0233817	0.0756485
3238.79	16622	0			0.035745	0.989468	27.6816	27.9762	1.01064	0.036125		6.47078	42.3122	6.53897	0.154541	0.0236338	0.152929
3318.79	16622	0			0.105347	2.28672	21.7066	9.49245	0.437308	0.046069		18.0958	92.6337	5.11907	0.0552614	0.0107952	0.195348
1158.79	16542	0			0.030403	29.3151	964.22	32.8916	0.034112	0.001037		5.39841	113.481	21.0211	0.18524	0.00881207	0.0475712
1238.79	16542	0			0.047049	35.0746	745.488	21.2544	0.028511	0.001341		7.87809	133.368	16.929	0.126934	0.00749806	0.0590703
1318.79	16542	0			0.021568	19.3693	898.071	46.3657	0.051628	0.001113		4.0002	79.1383	19.7836	0.249987	0.0126361	0.050547
1398.79	16542	0			0.003131	0.029018	9.26698	319.351	34.4612	0.10791		0.723242	1.69518	2.34386	1.38266	0.589909	0.426647
1478.79	16542	0			0.00023	0.002149	9.33546	4344.27	465.351	0.107118		0.172072	0.405153	2.35456	5.81153	2.4682	0.424708
1558.79	16542	0			0.000272	0.001952	7.18778	3682.3	512.299	0.139125		0.201849	0.368811	1.82716	4.95419	2.71142	0.547298
1638.79	16542	0			0.005845	0.106922	18.293	171.087	9.3526	0.054666		1.17967	5.32074	4.51037	0.847697	0.187944	0.221711
1718.79	16542	0			0.005608	0.109051	19.4439	178.301	9.17003	0.05143		1.12352	5.38278	4.79101	0.890064	0.185778	0.208724
1798.79	16542	0			0.002967	0.029507	9.94409	337.005	33.8899	0.100562		0.661085	1.65553	2.50425	1.51266	0.604038	0.39932
1878.79	16542	0			0.009668	0.253691	26.2398	103.432	3.9418	0.03811		1.90365	11.8585	6.22936	0.525306	0.0843275	0.16053
1958.79	16542	0			0.014371	19.8242	1379.43	69.5833	0.050443	0.000725		2.80345	80.7091	28.7892	0.356703	0.0123902	0.0347353
2038.79	16542	0			0.011639	13.8558	1190.42	85.9155	0.072172	0.00084		2.37992	60.1004	25.2531	0.420182	0.0166388	0.0395991
2118.79	16542	0			0.015965	19.0957	1196.07	62.6358	0.052368	0.000836		3.08349	78.1936	25.3588	0.324308	0.0127888	0.0394341
2198.79	16542	0			0.001117	1.11506	998.471	895.445	0.896816	0.001002		0.743576	16.1073	21.6619	1.34485	0.0620837	0.046164
2278.79	16542	0			0.018134	24.0909	1328.49	55.145	0.04151	0.000753		3.42871	95.4417	27.8361	0.291655	0.0104776	0.0359246
2358.79	16542	0			0.030552	29.2806	958.373	32.7307	0.034152	0.001043		5.42095	113.362	20.9117	0.184469	0.00882133	0.04782
2438.79	16542	0			0.029862	27.4717	919.96	33.4876	0.036401	0.001087		5.30456	107.116	20.1931	0.188517	0.00933571	0.0495219
2518.79	16542	0			6.88676	8.26539	1.20018	0.145206	0.120986	0.833205		13.579	40.7971	3.00443	0.0736432	0.0245116	0.332842
2598.79	16542	0			0.03205	2.68494	83.7745	31.2016	0.372447	0.011937		5.77939	85.6091	14.8128	0.173029	0.011681	0.0675091
2678.79	16542	0			0.007893	0.192573	24.3968	126.689	5.19283	0.040989		1.55893	9.19268	5.89679	0.641466	0.108782	0.169584
2758.79	16542	0			0.003883	0.063969	16.4754	257.551	15.6325	0.060697		0.836336	3.4113	4.07886	1.19569	0.293143	0.245167
2838.79	16542	0			0.011511	0.290664	25.2506	86.8721	3.4404	0.039603		2.22697	13.3959	6.01532	0.44904	0.0746495	0.166242
2918.79	16542	0			0.009493	0.28568	30.0932	105.339	3.50041	0.03323		1.90895	13.1912	6.9102	0.523849	0.075808	0.144714
2998.79	16542	0			0.009744	0.159633	16.3834	102.632	6.26436	0.061037		1.90504	7.70645	4.0453	0.524924	0.129761	0.2472
3078.79	16542	0			0.027156	1.73043	63.7227	36.8248	0.577891	0.015693		4.92798	57.4142	11.6506	0.202923	0.0174173	0.0858322
3158.79	16542	0			0.02368	1.23608	52.1998	42.2303	0.809012	0.019157		4.34799	44.9137	10.3298	0.229991	0.0222649	0.0968077
3238.79	16542	0			0.04676	2.19137	46.8638	21.3856	0.456334	0.021338		8.2651	79.8341	9.65917	0.120991	0.012526	0.103529
3318.79	16542	0			0.029946	1.3776	46.0021	33.393	0.725902	0.021738		5.43118	53.2118	9.79746	0.184122	0.0187928	0.102067
1158.79	16462	0			0.037932	34.6828	914.346	26.3631	0.028833	0.001094		6.57183	132.015	20.0881	0.152165	0.00757488	0.0497808
1238.79	16462	0			0.030622	1.80472	58.9346	32.6559	0.554104	0.016968		5.44048	53.8104	9.89074	0.183807	0.0185838	0.101105
1318.79	16462	0			0.019805	1.82872	92.3344	50.4913	0.546831	0.01083		3.69542	55.3188	14.9696	0.270605	0.018077	0.0668023
1398.79	16462	0			0.004321	0.058143	13.4556	231.423	17.199	0.074319		0.950344	3.19043	3.35713	1.05225	0.313437	0.297873
1478.79	16462	0			0.007654	0.101685	13.2851	130.649	9.83425	0.075272		1.49651	4.96564	3.31815	0.668222	0.201384	0.301373
1558.79	16462	0			0.002553	0.023767	9.30882	391.674	42.0756	0.107425		0.58636	1.37669	2.34785	1.70544	0.726381	0.425921
1638.79	16462	0			0.001945	0.014779	7.59858	514.135	67.6619	0.131604		0.501897	0.968578	1.92983	1.99244	1.03244	0.518179
1718.79	16462	0			0.004572	0.05748	12.5719	218.717	17.3972	0.079542		0.950984	2.99137	3.14555	1.05154	0.334295	0.31791
1798.79	16462	0			0.002232	0.020647	9.25036	448.021	48.4328	0.108104		0.532768	1.24355	2.33413	1.87699	0.804149	0.428425
1878.79	16462	0			0.006762	0.159788	23.631	147.89	6.25829	0.042317		1.42981	8.02252	5.61092	0.699396	0.124649	0.178224
1958.79	16462	0			0.011584	1.25907	108.689	86.3247	0.794236	0.009201		2.3738	34.1611	14.3909	0.421266	0.0292731	0.0694884
2038.79	16462	0			0.018178	1.63478	89.9304	55.0105	0.611701	0.01112		3.44781	44.7171	12.9697	0.290039	0.0223628	0.0771028
2118.79	16462	0			0.021358	22.0804	1033.84	46.8214	0.045289	0.000967		3.96441	88.4996	22.3235	0.252244	0.0112995	0.0447958
2198.79	16462	0			0.92907	0.118365	0.127402	1.07635	8.44844	7.84919		5.36118	9.88093	1.84305	0.186526	0.101205	0.542579
2278.79	16462	0			11.5689	0.071696	0.006197	0.086439	13.9478	161.361		20.0373	3.90463	0.194867	0.0499068	0.256107	5.13169
2358.79	16462	0			0.01019	0.227162	22.292	98.1324	4.40214	0.044859		1.98468	10.6972	5.38988	0.503859	0.0934825	0.185533
2438.79	16462	0			0.019091	1.72327	90.2657	52.3805	0.580292	0.011078		3.61814	41.5037	11.471	0.276385	0.0240942	0.0871762
2518.79	16462	0			0.032655	1.91198	58.5506	30.623	0.523018	0.017079		5.68097	50.7226	8.92852	0.176026	0.0197151	0.112001
2598.79	16462	0			0.032141	2.3447	72.9494	31.1125	0.426495	0.013708		5.77499	75.1237	13.0085	0.17316	0.0133114	0.076873
2678.79	16462	0			0.011603	0.830682	71.5925	86.1852	1.20383	0.013968		2.25124	32.1375	14.2755	0.444199	0.0311163	0.0700503
2758.79	16462	0			0.004213	0.121331	28.8005	237.37	8.24189	0.034722		0.920341	6.29384	6.8386	1.08655	0.158885	0.146229
2838.79	16462	0			0.011596	0.795297	68.5841	86.237	1.25739	0.014581		2.28363	29.7884	13.0443	0.437899	0.0335701	0.0766617
2918.79	16462	0			0.011016	0.249087	22.6106	90.7736	4.01466	0.044227		2.12675	11.6273	5.46715	0.470201	0.0860048	0.182911
2998.79	16462	0			0.003609	0.05135	14.2275	277.071	19.4743	0.070286		0.795492	2.81851	3.5431	1.25708	0.354797	0.282238
3078.79	16462	0			0.003432	0.041398	12.0615	291.351	24.1555	0.082909		0.7727	2.33601	3.02317	1.29416	0.428081	0.330778
3158.79	16462	0			0.01204	0.246887	20.5052	83.0551	4.05044	0.048768		2.34349	11.5745	4.93898	0.426713	0.0863971	0.202471
3238.79	16462	0			0.075011	92.4951	1233.09	13.3314	0.010811	0.000811		12.7302	331.639	26.0513	0.0785532	0.00301533	0.0383858
3318.79	16462	0			0.0196	0.589129	30.0583	51.0217	1.69742	0.033269		3.64752	25.3476	6.94928	0.274159	0.0394514	0.1439
1158.79	16382	0			0.032213	26.2332	814.367	31.0433	0.03812	0.001228		5.64505	102.839	18.2176	0.177146	0.00972391	0.054892
1238.79	16382	0			0.02646	2.09259	79.0866	37.7936	0.477876	0.012644		4.79975	60.978	12.7044	0.208344	0.0163993	0.0787128
1318.79	16382	0			0.011945	0.539823	45.1921	83.7164	1.85246	0.022128		2.35688	22.1879	9.41409	0.424289	0.0450696	0.106224
1398.79	16382	0			0.009937	0.369592	37.1931	100.633	2.70569	0.026887		1.9604	16.5019	8.4176	0.510099	0.0605991	0.118799
1478.79	16382	0			0.008178	0.122245	14.9482	122.281	8.18032	0.066898		1.61549	5.99816	3.7129	0.619007	0.166718	0.269331
1558.79	16382	0			0.005741	0.086018	14.9835	174.191	11.6255	0.06674		1.15005	4.28735	3.72795	0.869524	0.233244	0.268244
1638.79	16382	0			0.000254	0.001867	7.35582	3940.71	535.728	0.135947		0.189076	0.353009	1.86702	5.28888	2.83279	0.535613
1718.79	16382	0			0.002419	0.019862	8.2108	413.386	50.3466	0.121791		0.573584	1.19242	2.07889	1.74342	0.838631	0.481025
1798.79	16382	0			0.002035	0.016045	7.883	491.311	62.3254	0.126855		0.508785	1.01677	1.99843	1.96547	0.983506	0.500393
1878.79	16382	0			0.005023	0.056596	11.268	199.093	17.669	0.088747		1.0861	3.07891	2.83484	0.92073	0.324791	0.352753
1958.79	16382	0			7.42777	8.91469	1.20018	0.13463	0.112174	0.833205		14.3252	43.0391	3.00443	0.069807	0.0232347	0.332842
2038.79	16382	0			0.001018	0.110207	108.306	982.749	9.07382	0.009233		0.685908	9.57443	13.9588	1.45792	0.104445	0.0716396
2118.79	16382	0			0.015803	15.0075	949.669	63.2797	0.066633	0.001053		3.08822	64.0772	20.7489	0.323811	0.0156062	0.0481953
2198.79	16382	0			0.053496	3.73838	69.8816	18.693	0.267496	0.01431		9.42372	122.408	12.9894	0.106115	0.00816937	0.0769859
2278.79	16382	0			0.004663	0.069693	14.9459	214.454	14.3487	0.066908		0.992351	3.68412	3.71252	1.00771	0.271435	0.269359
2358.79	16382	0			0.00334	0.030344	9.08393	299.366	32.9556	0.110084		0.751374	1.72604	2.29718	1.3309	0.579362	0.435317
2438.79	16382	0			0.008568	0.158232	18.4682	116.716	6.31983	0.054147		1.72154	7.76233	4.50894	0.580874	0.128827	0.221782
2518.79	16382	0			0.020043	23.3684	1165.89	49.8919	0.042793	0.000858		3.74875	92.9471	24.7941	0.266756	0.0107588	0.0403321
2598.79	16382	0			0.027951	2.2404	80.1551	35.7771	0.446349	0.012476		5.05132	65.9571	13.0574	0.197968	0.0151614	0.0765848
2678.79	16382	0			0.01042	0.670916	64.3877	95.9699	1.4905	0.015531		2.06819	26.3207	12.7264	0.483514	0.0379929	0.0785766
2758.79	16382	0			0.007956	0.305914	38.453	125.699	3.26889	0.026006		1.59981	13.9982	8.74992	0.625075	0.0714377	0.114287
2838.79	16382	0			0.013742	0.628765	45.7549	72.7695	1.59042	0.021856		2.62217	26.3331	10.0425	0.381364	0.0379751	0.099577
2918.79	16382	0			0.009866	0.208808	21.1651	101.361	4.78909	0.047248		1.9246	9.8959	5.14179	0.519588	0.101052	0.194485
2998.79	16382	0			0.006279	0.09973	15.8842	159.271	10.027	0.062956		1.26772	4.99143	3.93733	0.788819	0.200343	0.253979
3078.79	16382	0			0.00649	0.097065	14.9563	154.086	10.3024	0.066861		1.3039	4.84713	3.71741	0.76693	0.206308	0.269005
3158.79	16382	0			0.007338	0.180924	24.6568	136.283	5.52719	0.040557		1.52265	8.89036	5.83874	0.656749	0.112481	0.17127
3238.79	16382	0			0.023865	1.378	57.7418	41.9027	0.725691	0.017318		4.37184	45.483	10.4036	0.228737	0.0219863	0.0961204
3318.79	16382	0			0.089203	2.48795	27.891	11.2104	0.401938	0.035854		15.4551	98.417	6.36792	0.0647034	0.0101608	0.157037
1158.79	16302	0			0.022247	1.43118	64.3322	44.9503	0.698722	0.015544		4.10677	38.6791	9.41838	0.2435	0.0258537	0.106175
1238.79	16302	0			0.027979	1.98543	70.9608	35.7407	0.503669	0.014092		5.07026	64.2134	12.6647	0.197229	0.0155731	0.0789596
1318.79	16302	0			0.017054	0.941799	55.2231	58.6357	1.0618	0.018108		3.19407	38.0721	11.9196	0.313081	0.026266	0.0838952
1398.79	16302	0			0.006418	0.122465	19.0826	155.821	8.16563	0.052404		1.29567	6.07043	4.68516	0.771801	0.164733	0.21344
1478.79	16302	0			0.002733	0.036953	13.5212	365.904	27.0615	0.073958		0.608915	2.05541	3.37554	1.64227	0.48652	0.296249
1558.79	16302	0			0.003214	0.035596	11.0751	311.133	28.093	0.090293		0.6937	1.92847	2.77997	1.44155	0.518547	0.359716
1638.79	16302	0			0.001765	0.014039	7.95405	566.583	71.232	0.125722		0.463674	0.935074	2.01667	2.15669	1.06943	0.495868
1718.79	16302	0			0.002355	0.021069	8.94619	424.614	47.4631	0.111779		0.563286	1.27346	2.26076	1.7753	0.785265	0.442329
1798.79	16302	0			9.6595	0.02553	0.002643	0.103525	39.169	378.353		17.4036	1.49792	0.0860698	0.0574595	0.667592	11.6185
1878.79	16302	0			0.005021	0.079583	15.8512	199.178	12.5655	0.063087		1.08269	4.24274	3.91872	0.923629	0.235697	0.255185
1958.79	16302	0			0.007678	11.5302	1501.7	130.24	0.086729	0.000666		1.67555	52.0704	31.0765	0.596817	0.0192048	0.0321786
2038.79	16302	0			0.011707	15.5167	1325.46	85.4212	0.064447	0.000754		2.36995	65.8356	27.7793	0.42195	0.0151894	0.035998
2118.79	16302	0			0.013466	1.34536	99.9044	74.2584	0.743295	0.01001		2.66544	38.0942	14.2919	0.375172	0.0262507	0.0699697
2198.79	16302	0			0.008469	0.427842	50.5209	118.083	2.33731	0.019794		1.76317	18.115	10.2741	0.56716	0.0552027	0.0973319
2278.79	16302	0			0.002953	0.030961	10.4842	338.628	32.2989	0.095382		0.678365	1.79053	2.63948	1.47413	0.558493	0.378862
2358.79	16302	0			0.00192	0.01285	6.69111	520.715	77.8219	0.149452		0.498919	0.850314	1.70431	2.00433	1.17604	0.586747
2438.79	16302	0			0.002356	0.019165	8.13551	424.503	52.179	0.122918		0.572042	1.17972	2.0623	1.74812	0.847659	0.484897
2518.79	16302	0			0.003636	0.040416	11.1161	275.043	24.7427	0.089959		0.79429	2.21831	2.79283	1.25899	0.450793	0.35806
2598.79	16302	0			0.010984	0.39819	36.2518	91.0416	2.51137	0.027585		2.19334	17.3693	7.9191	0.455926	0.0575729	0.126277
2678.79	16302	0			0.022269	1.74753	78.4743	44.9057	0.572235	0.012743		4.11009	61.6707	15.0047	0.243304	0.0162151	0.0666457
2758.79	16302	0			0.008002	0.427062	53.3663	124.962	2.34158	0.018738		1.64653	18.2738	11.0984	0.607339	0.0547231	0.0901031
2838.79	16302	0			0.00628	0.396564	63.1498	159.242	2.52166	0.015835		1.39768	16.7774	12.0037	0.715471	0.0596041	0.0833075
2918.79	16302	0			0.008602	0.252645	29.3705	116.252	3.95812	0.034048		1.71354	11.8275	6.90234	0.583586	0.0845491	0.144878
2998.79	16302	0			0.92907	1.11506	1.20018	1.07635	0.896816	0.833205		5.36118	16.1073	3.00443	0.186526	0.0620837	0.332842
3078.79	16302	0			0.003779	0.042243	11.1795	264.647	23.6726	0.08945		0.814937	2.28811	2.80771	1.22709	0.437042	0.356162
3158.79	16302	0			0.012462	0.230034	18.459	80.2446	4.34719	0.054174		2.3997	10.8169	4.50761	0.416719	0.092448	0.221847
3238.79	16302	0			0.025031	1.57012	62.7276	39.9507	0.636892	0.015942		4.58358	56.372	12.2987	0.21817	0.0177393	0.0813095
3318.79	16302	0			0.05125	1.65372	32.2677	19.5122	0.604699	0.030991		9.20328	69.266	7.52623	0.108657	0.0144371	0.132869
1158.79	16222	0			0.050863	2.43678	47.9087	19.6607	0.410377	0.020873		8.76746	79.6041	9.0795	0.114058	0.0125622	0.110138
1238.79	16222	0			0.011195	0.289422	25.8518	89.3223	3.45517	0.038682		2.16772	13.3443	6.15593	0.461315	0.0749384	0.162445
1318.79	16222	0			0.002061	0.019474	9.44949	485.248	51.3518	0.105826		0.502147	1.19669	2.38315	1.99145	0.835636	0.419612
1398.79	16222	0			0.005871	0.076429	13.0181	170.329	13.084	0.076816		1.1908	3.87414	3.2534	0.839774	0.258122	0.307371
1478.79	16222	0			0.007084	0.151359	21.3676	141.172	6.60682	0.0468		1.44796	7.488	5.17142	0.690627	0.133547	0.193371
1558.79	16222	0			0.004119	0.165545	40.188	242.762	6.04067	0.024883		0.949393	8.52025	8.97442	1.0533	0.117367	0.111428
1638.79	16222	0			0.009551	0.276347	28.9351	104.706	3.61864	0.03456		1.88513	12.8057	6.79302	0.530468	0.0780902	0.14721
1718.79	16222	0			0.008911	0.25191	28.2683	112.216	3.96967	0.035375		1.77476	11.8003	6.64893	0.563456	0.0847439	0.1504
1798.79	16222	0			0.007184	0.156552	21.791	139.193	6.38765	0.045891		1.46508	7.71534	5.26615	0.682557	0.129612	0.189892
1878.79	16222	0			0.009558	0.17926	18.7548	104.623	5.57848	0.05332		1.85282	8.54049	4.60944	0.539716	0.117089	0.216946
1958.79	16222	0			0.00979	0.196821	20.1042	102.144	5.08076	0.049741		1.88923	9.30927	4.92754	0.529316	0.10742	0.202941
2038.79	16222	0			0.00938	0.708438	75.5276	106.612	1.41156	0.01324		1.88654	27.0433	14.3348	0.53007	0.0369778	0.0697602
2118.79	16222	0			0.014392	0.936821	65.0927	69.4825	1.06744	0.015363		2.80859	32.0946	11.4273	0.356051	0.0311579	0.0875097
2198.79	16222	0			0.011904	0.969019	81.4002	84.0027	1.03197	0.012285		2.32022	35.1883	15.166	0.430994	0.0284185	0.0659372
2278.79	16222	0			0.005842	0.111451	19.077	171.17	8.97259	0.052419		1.1895	5.57492	4.68676	0.840687	0.179375	0.213367
2358.79	16222	0			0.000265	0.002008	7.58346	3776.57	498.002	0.131866		0.196994	0.379168	1.92477	5.0763	2.63735	0.519542
2438.79	16222	0			0.000288	0.001913	6.63919	3471.21	522.836	0.150621		0.213639	0.361533	1.69226	4.6808	2.766	0.590925
2518.79	16222	0			0.001777	0.012692	7.14049	562.596	78.7895	0.140046		0.46164	0.837277	1.8137	2.16619	1.19435	0.551358
2598.79	16222	0			0.003747	0.033001	8.80739	266.886	30.3025	0.113541		0.825566	1.84063	2.22954	1.21129	0.543291	0.448523
2678.79	16222	0			0.005562	0.072512	13.0368	179.788	13.7908	0.076706		1.15421	3.76005	3.25769	0.866395	0.265954	0.306966
2758.79	16222	0			0.006911	0.113304	16.3958	144.706	8.82583	0.060991		1.39701	5.66032	4.05174	0.715814	0.176669	0.246808
2838.79	16222	0			0.018892	1.06596	56.4239	52.9325	0.938124	0.017723		3.52531	41.1498	11.6727	0.283663	0.0243015	0.0856701
2918.79	16222	0			0.011339	0.257878	22.7431	88.1929	3.8778	0.043969		2.20191	12.0226	5.46006	0.454151	0.0831769	0.183148
2998.79	16222	0			0.004325	0.067333	15.568	231.209	14.8516	0.064234		0.916567	3.54104	3.86337	1.09103	0.282403	0.258842
3078.79	16222	0			0.00381	0.054689	14.3539	262.465	18.2852	0.069667		0.85863	3.06533	3.57003	1.16465	0.326229	0.28011
3158.79	16222	0			0.01959	0.91531	46.7244	51.0476	1.09253	0.021402		3.64613	36.6493	10.0516	0.274264	0.0272856	0.0994869
3238.79	16222	0			0.02217	0.503812	22.7248	45.1058	1.98487	0.044005		4.09278	22.3878	5.47008	0.244333	0.0446671	0.182813
3318.79	16222	0			0.064291	1.50612	23.4268	15.5544	0.663958	0.042686		11.5069	64.9371	5.64331	0.0869043	0.0153995	0.177201
1158.79	16142	0			0.029791	2.30388	77.3338	33.5668	0.434051	0.012931		5.26697	55.536	10.5442	0.189863	0.0180063	0.0948388
1238.79	16142	0			0.007427	0.099021	13.3319	134.637	10.0989	0.075008		1.49322	4.96928	3.3279	0.669695	0.201236	0.300489
1318.79	16142	0			0.002163	0.019812	9.15946	462.33	50.4757	0.109177		0.518029	1.19732	2.31129	1.93039	0.835201	0.432658
1398.79	16142	0			0.005324	0.084098	15.7956	187.825	11.8909	0.063309		1.08828	4.26508	3.9191	0.918882	0.234462	0.25516
1478.79	16142	0			0.015846	1.22958	77.5959	63.1077	0.813287	0.012887		3.00171	43.9042	14.6264	0.333143	0.0227769	0.0683696
1558.79	16142	0			0.010666	1.04216	97.7083	93.7555	0.959545	0.010235		2.13745	34.38	16.0846	0.467848	0.0290866	0.0621712
1638.79	16142	0			0.00669	0.812787	121.491	149.475	1.23033	0.008231		1.46012	26.7137	18.2955	0.684875	0.037434	0.0546581
1718.79	16142	0			0.010602	0.729211	68.7775	94.3176	1.37134	0.01454		2.08516	28.4941	13.6652	0.479578	0.035095	0.0731788
1798.79	16142	0			0.005217	0.206998	39.6805	191.695	4.83096	0.025201		1.13892	10.1216	8.88697	0.878022	0.0987988	0.112524
1878.79	16142	0			0.005452	0.111338	20.4232	183.434	8.98165	0.048964		1.13273	5.64895	4.98703	0.882825	0.177024	0.20052
1958.79	16142	0			0.006407	0.121952	19.0343	156.079	8.19992	0.052537		1.30894	6.10313	4.66266	0.763978	0.16385	0.21447
2038.79	16142	0			0.015681	1.68616	107.529	63.7711	0.593062	0.0093		2.99592	49.8981	16.6553	0.333787	0.0200408	0.0600408
2118.79	16142	0			0.01401	1.16698	83.2934	71.3752	0.856912	0.012006		2.70873	39.1671	14.4596	0.369177	0.0255316	0.0691582
2198.79	16142	0			0.008582	0.787985	91.8132	116.516	1.26906	0.010892		1.7719	27.9487	15.7733	0.564366	0.0357798	0.0633983
2278.79	16142	0			0.006266	0.174243	27.8065	159.585	5.73912	0.035963		1.28267	8.49692	6.62442	0.779627	0.11769	0.150957
2358.79	16142	0			0.004073	0.074397	18.267	245.535	13.4415	0.054744		0.862834	3.88673	4.50461	1.15897	0.257286	0.221995
2438.79	16142	0			0.002786	0.027501	9.87276	359	36.3627	0.101289		0.642606	1.59946	2.48902	1.55616	0.625211	0.401764
2518.79	16142	0			0.000248	0.001869	7.54893	4038.89	535.028	0.132469		0.184637	0.353461	1.91435	5.41603	2.82917	0.522369
2598.79	16142	0			0.003103	0.03276	10.5566	322.245	30.5255	0.094727		0.690795	1.8342	2.65521	1.44761	0.545196	0.376619
2678.79	16142	0			0.002762	0.022678	8.21161	362.094	44.0954	0.121779		0.632605	1.31497	2.07866	1.58077	0.760473	0.481079
2758.79	16142	0			0.001861	0.014102	7.57648	537.28	70.9142	0.131987		0.47258	0.907951	1.92126	2.11604	1.10138	0.520491
2838.79	16142	0			0.000289	0.002073	7.16816	3457.76	482.377	0.139506		0.214436	0.391174	1.8242	4.66339	2.55641	0.548187
2918.79	16142	0			0.001788	0.0121	6.76752	559.301	82.6449	0.147765		0.48165	0.830726	1.72475	2.0762	1.20377	0.579794
2998.79	16142	0			9.28162	0.023268	0.002507	0.10774	42.9782	398.907		16.8823	1.38007	0.0817466	0.0592335	0.724599	12.2329
3078.79	16142	0			0.0052	0.064024	12.3111	192.291	15.6192	0.081227		1.09528	3.37757	3.08376	0.913013	0.296071	0.324279
3158.79	16142	0			0.020353	1.2611	61.9629	49.1339	0.792957	0.016139		3.7805	46.5032	12.3008	0.264515	0.0215039	0.0812955
3238.79	16142	0			0.02363	0.96271	40.7411	42.3192	1.03873	0.024545		4.35024	40.4629	9.30132	0.229873	0.024714	0.107512
3318.79	16142	0			0.035968	0.948296	26.3653	27.8028	1.05452	0.037929		6.51844	40.9355	6.27996	0.153411	0.0244286	0.159237
1158.79	16062	0			0.023444	16.7048	712.542	42.655	0.059863	0.001403		4.28735	69.9379	16.3126	0.233244	0.0142984	0.0613023
1238.79	16062	0			0.020249	1.17514	58.0343	49.3849	0.850962	0.017231		3.76476	43.4258	11.5348	0.265621	0.0230278	0.0866941
1318.79	16062	0			0.00273	0.030756	11.2671	366.344	32.5144	0.088754		0.632221	1.78886	2.82949	1.58173	0.559015	0.353421
1398.79	16062	0			9.77309	0.026642	0.002726	0.102322	37.5349	366.832		17.5603	1.55758	0.0886992	0.0569468	0.642021	11.2741
1478.79	16062	0			0.009477	0.171785	18.127	105.521	5.82122	0.055166		1.85693	8.26193	4.44924	0.538524	0.121037	0.224757
1558.79	16062	0			0.02173	1.50186	69.1145	46.0193	0.665842	0.014469		4.01553	57.1132	14.2231	0.249033	0.0175091	0.0703082
1638.79	16062	0			0.017737	1.12088	63.1954	56.38	0.892153	0.015824		3.32757	42.0034	12.6229	0.30052	0.0238076	0.0792214
1718.79	16062	0			0.006551	0.310497	47.3977	152.651	3.22064	0.021098		1.40811	14.097	10.0113	0.710169	0.0709371	0.0998875
1798.79	16062	0			0.009918	0.333396	33.6158	100.829	2.99944	0.029748		1.93299	15.15	7.83759	0.517334	0.0660068	0.12759
1878.79	16062	0			0.01257	0.280268	22.2966	79.5546	3.56801	0.04485		2.39272	12.9536	5.41373	0.417934	0.0771988	0.184715
1958.79	16062	0			0.013813	1.02734	74.3723	72.3932	0.973388	0.013446		2.65769	37.1383	13.9739	0.376266	0.0269264	0.071562
2038.79	16062	0			0.92907	1.11506	1.20018	1.07635	0.896816	0.833205		5.36118	16.1073	3.00443	0.186526	0.0620837	0.332842
2118.79	16062	0			0.024728	1.51216	61.1512	40.4397	0.661306	0.016353		4.53429	55.681	12.28	0.220542	0.0179595	0.0814334
2198.79	16062	0			0.007082	0.582696	82.2786	141.203	1.71616	0.012154		1.47013	23.0312	15.6662	0.680213	0.0434193	0.0638318
2278.79	16062	0			0.004779	0.132055	27.6342	209.262	7.57258	0.036187		1.03512	6.78328	6.55313	0.966071	0.147421	0.152599
2358.79	16062	0			0.002518	0.053387	21.2038	397.171	18.7311	0.047161		0.604023	3.12491	5.1735	1.65557	0.320009	0.193293
2438.79	16062	0			0.001892	0.033805	17.8665	528.511	29.5811	0.055971		0.466124	2.05733	4.41371	2.14535	0.486066	0.226567
2518.79	16062	0			0.002528	0.032509	12.8588	395.539	30.7603	0.077768		0.593195	1.90711	3.21498	1.68579	0.524353	0.311044
2598.79	16062	0			0.002588	0.024369	9.41715	386.435	41.0353	0.106189		0.586766	1.3927	2.37351	1.70426	0.718032	0.421317
2678.79	16062	0			0.000276	0.001972	7.15633	3628.51	507.035	0.139736		0.204728	0.372558	1.81977	4.88454	2.68415	0.54952
2758.79	16062	0			0.000274	0.001928	7.03404	3649.06	518.772	0.142166		0.203618	0.364305	1.78916	4.91115	2.74495	0.558922
2838.79	16062	0			0.001935	0.015816	8.17318	516.754	63.2256	0.122351		0.489094	1.01239	2.06993	2.0446	0.987761	0.483108
2918.79	16062	0			0.005741	0.074336	12.949	174.195	13.4524	0.077226		1.16454	3.76935	3.23677	0.858708	0.265298	0.30895
2998.79	16062	0			0.007979	0.187788	23.5358	125.332	5.32516	0.042488		1.59548	9.04011	5.66608	0.626771	0.110618	0.176489
3078.79	16062	0			0.015436	0.955123	61.8755	64.7828	1.04699	0.016161		2.93664	35.9387	12.238	0.340525	0.0278251	0.0817125
3158.79	16062	0			0.015782	1.15125	72.9487	63.3649	0.868622	0.013708		3.00052	40.794	13.5956	0.333276	0.0245134	0.073553
3238.79	16062	0			0.028497	1.01563	35.6394	35.091	0.984611	0.028059		5.20305	42.6532	8.19773	0.192195	0.0234449	0.121985
3318.79	16062	0			0.029111	1.20858	41.5156	34.3509	0.82742	0.024087		5.31302	49.8858	9.38935	0.188217	0.0200458	0.106504
1158.79	15982	0			0.059867	4.13203	69.0197	16.7036	0.242012	0.014489		10.2978	120.746	11.7254	0.0971083	0.00828186	0.0852849
1238.79	15982	0			0.018452	1.62019	87.8078	54.196	0.617212	0.011389		3.49279	44.5928	12.7671	0.286304	0.0224251	0.0783263
1318.79	15982	0			0.010289	0.364512	35.4259	97.1871	2.74339	0.028228		2.03342	16.2803	8.00636	0.491782	0.061424	0.124901
1398.79	15982	0			0.007135	0.114683	16.0724	140.146	8.71967	0.062218		1.41426	5.63424	3.98388	0.707084	0.177486	0.251012
1478.79	15982	0			0.003951	0.042591	10.7796	253.097	23.4793	0.092768		0.849682	2.30326	2.71073	1.17691	0.434167	0.368904
1558.79	15982	0			0.002815	0.033265	11.8184	355.279	30.0615	0.084614		0.635442	1.88254	2.96257	1.57371	0.531196	0.337544
1638.79	15982	0			0.012824	0.489015	38.1329	77.979	2.04493	0.026224		2.47214	21.0761	8.52544	0.404508	0.0474471	0.117296
1718.79	15982	0			0.014977	0.632488	42.2305	66.7689	1.58106	0.02368		2.84085	26.5541	9.34723	0.352007	0.037659	0.106984
1798.79	15982	0			0.002515	0.038505	15.3102	397.615	25.9706	0.065316		0.599053	2.27712	3.80119	1.6693	0.439152	0.263075
1878.79	15982	0			0.003483	0.035982	10.3323	287.15	27.7915	0.096784		0.763805	1.98674	2.6011	1.30923	0.503338	0.384452
1958.79	15982	0			0.00641	0.117529	18.3353	156.007	8.50855	0.05454		1.30453	5.87681	4.50491	0.766557	0.17016	0.22198
2038.79	15982	0			0.014457	0.534026	36.9397	69.1721	1.87257	0.027071		2.73105	23.3254	8.54084	0.36616	0.0428717	0.117084
2118.79	15982	0			0.00637	0.11139	17.4879	156.997	8.97743	0.057182		1.29065	5.56496	4.31174	0.774801	0.179696	0.231925
2198.79	15982	0			0.004653	0.133534	28.6987	214.917	7.48872	0.034845		1.04993	7.02652	6.69235	0.95244	0.142318	0.149424
2278.79	15982	0			0.020516	1.09053	53.1546	48.7418	0.916982	0.018813		3.80303	43.6238	11.4708	0.262948	0.0229233	0.087178
2358.79	15982	0			0.000352	0.013355	37.9076	2838.41	74.8769	0.02638		0.258984	2.24548	8.67033	3.86124	0.44534	0.115336
2438.79	15982	0			0.003004	0.071631	23.8417	332.84	13.9604	0.041943		0.69962	4.03036	5.76078	1.42935	0.248117	0.173588
2518.79	15982	0			0.003472	0.077418	22.3003	288.052	12.9169	0.044842		0.75992	4.13302	5.43876	1.31593	0.241954	0.183865
2598.79	15982	0			0.002638	0.028724	10.8903	379.142	34.8147	0.091825		0.603457	1.65121	2.73625	1.65712	0.605617	0.365464
2678.79	15982	0			0.002738	0.031279	11.4229	365.191	31.9702	0.087544		0.613469	1.7579	2.86551	1.63007	0.568861	0.348979
2758.79	15982	0			0.005363	0.067776	12.6365	186.446	14.7545	0.079136		1.11487	3.52482	3.16165	0.896968	0.283703	0.316291
2838.79	15982	0			0.003283	0.038057	11.5914	304.582	26.2766	0.086271		0.730655	2.12496	2.90829	1.36864	0.470598	0.343845
2918.79	15982	0			0.003011	0.032617	10.8315	332.082	30.6589	0.092323		0.664931	1.80943	2.72124	1.50392	0.552659	0.36748
2998.79	15982	0			0.005103	0.065926	12.9181	195.949	15.1685	0.077411		1.06332	3.43376	3.22928	0.940451	0.291226	0.309666
3078.79	15982	0			0.007475	0.234194	31.3307	133.781	4.26997	0.031918		1.52766	11.1047	7.26909	0.654598	0.0900523	0.137569
3158.79	15982	0			0.015653	0.779084	49.7719	63.8852	1.28356	0.020092		2.97284	30.9207	10.401	0.336378	0.0323408	0.0961443
3238.79	15982	0			0.021106	0.511865	24.2521	47.3798	1.95364	0.041234		3.90499	22.7847	5.83477	0.256083	0.043889	0.171386
3318.79	15982	0			0.045408	1.49251	32.8686	22.0224	0.670012	0.030424		8.17404	62.4798	7.64368	0.122339	0.0160052	0.130827
3398.79	15982	0			0.031829	0.678889	21.3294	31.4181	1.473	0.046884		5.81323	30.3091	5.21382	0.172021	0.0329934	0.191798
1158.79	15902	0			0.037312	2.81742	75.5099	26.8011	0.354934	0.013243		6.54675	77.5126	11.8399	0.152748	0.0129011	0.0844604
1238.79	15902	0			0.01622	1.18914	73.3137	61.6527	0.840944	0.01364		3.12543	36.8842	11.8013	0.319956	0.0271119	0.0847362
1318.79	15902	0			0.005986	0.364935	60.9658	167.059	2.74021	0.016403		1.30881	15.919	12.1629	0.764051	0.062818	0.082217
1398.79	15902	0			0.010891	0.290307	26.6566	91.8224	3.44463	0.037514		2.10854	13.3816	6.34638	0.474261	0.0747294	0.15757
1478.79	15902	0			0.017099	0.592603	34.6579	58.4843	1.68747	0.028853		3.20088	25.6868	8.02493	0.312414	0.0389304	0.124612
1558.79	15902	0			0.016839	0.611274	36.3017	59.387	1.63593	0.027547		3.16662	25.9736	8.20232	0.315794	0.0385006	0.121917
1638.79	15902	0			0.010179	0.714756	70.2168	98.2387	1.39908	0.014242		2.07813	26.1084	12.5634	0.481202	0.0383018	0.0795962
1718.79	15902	0			0.019635	0.999064	50.8819	50.9295	1.00094	0.019653		3.65608	38.9288	10.6477	0.273517	0.0256879	0.0939172
1798.79	15902	0			0.009298	0.226303	24.3381	107.547	4.41885	0.041088		1.80933	10.6413	5.88132	0.552689	0.0939737	0.17003
1878.79	15902	0			0.004608	0.06256	13.5758	217.004	15.9846	0.073661		0.946984	3.20898	3.38863	1.05598	0.311626	0.295104
1958.79	15902	0			0.00357	0.03733	10.4581	280.151	26.7878	0.095619		0.786525	2.07087	2.63293	1.27142	0.48289	0.379805
2038.79	15902	0			0.003125	0.04139	13.2434	319.964	24.1602	0.075509		0.710578	2.3502	3.30745	1.40731	0.425495	0.302347
2118.79	15902	0			10.2755	0.053663	0.005222	0.097319	18.6347	191.481		18.2532	3.02602	0.16578	0.0547848	0.330467	6.03209
2198.79	15902	0			0.01236	0.62853	50.854	80.9094	1.59102	0.019664		2.39464	25.7414	10.7496	0.417599	0.0388479	0.0930269
2278.79	15902	0			0.016596	0.921339	55.5153	60.255	1.08538	0.018013		3.11745	36.9281	11.8456	0.320775	0.0270796	0.0844194
2358.79	15902	0			0.005149	0.250888	48.7226	194.2	3.98584	0.020524		1.13342	11.8916	10.4918	0.882289	0.0840929	0.0953122
2438.79	15902	0			0.005459	0.218889	40.0968	183.183	4.56852	0.02494		1.14694	10.5017	9.15629	0.871888	0.0952229	0.109215
2518.79	15902	0			0.002688	0.062069	23.0908	372.02	16.1112	0.043307		0.653551	3.64709	5.58042	1.5301	0.274191	0.179198
2598.79	15902	0			0.004034	0.068732	17.04	247.921	14.5493	0.058685		0.856052	3.60831	4.21506	1.16815	0.277138	0.237245
2678.79	15902	0			0.003453	0.061284	17.7499	289.634	16.3175	0.056338		0.766352	3.35371	4.3762	1.30488	0.298177	0.228509
2758.79	15902	0			0.007017	0.270231	38.512	142.515	3.70053	0.025966		1.42083	12.5644	8.84299	0.703813	0.0795899	0.113084
2838.79	15902	0			0.005817	0.562123	96.6267	171.896	1.77897	0.010349		1.24649	21.9863	17.6387	0.802256	0.0454828	0.0566937
2918.79	15902	0			0.006366	0.158288	24.8633	157.076	6.31759	0.04022		1.29322	7.7487	5.99179	0.773264	0.129054	0.166895
2998.79	15902	0			0.004578	0.070282	15.3535	218.457	14.2285	0.065132		0.945188	3.60684	3.81601	1.05799	0.277251	0.262054
3078.79	15902	0			0.010896	0.340295	31.2311	91.7767	2.93863	0.032019		2.11965	15.4153	7.27255	0.471775	0.0648706	0.137503
3158.79	15902	0			0.016372	0.493552	30.1466	61.0809	2.02613	0.033171		3.08326	21.6018	7.00615	0.324332	0.0462925	0.142732
3238.79	15902	0			0.01675	0.262279	15.6587	59.7023	3.81273	0.063862		3.13639	12.1628	3.87796	0.318838	0.0822179	0.257868
3318.79	15902	0			0.03315	0.486745	14.683	30.1656	2.05446	0.068106		6.03147	22.0077	3.64881	0.165797	0.0454387	0.274062
3398.79	15902	0			0.03286	0.660079	20.0876	30.432	1.51497	0.049782		5.98341	29.3652	4.90777	0.167129	0.0340539	0.203759
1158.79	15822	0			0.056013	68.6471	1225.57	17.8531	0.014567	0.000816		9.62128	249.292	25.9105	0.103936	0.00401135	0.0385943
1238.79	15822	0			0.020525	0.890537	43.3888	48.7221	1.12292	0.023047		3.81731	34.104	8.93405	0.261965	0.0293221	0.111931
1318.79	15822	0			0.008614	0.213434	24.777	116.087	4.68528	0.04036		1.7056	10.136	5.94276	0.586303	0.0986583	0.168272
1398.79	15822	0			0.013076	0.348654	26.6643	76.478	2.86817	0.037503		2.47099	15.8948	6.43257	0.404696	0.0629135	0.155459
1478.79	15822	0			0.008545	0.16874	19.7472	117.028	5.92629	0.05064		1.68776	8.14304	4.82476	0.5925	0.122804	0.207264
1558.79	15822	0			0.018704	0.744376	39.7983	53.4654	1.34341	0.025127		3.48579	31.3322	8.98856	0.286879	0.031916	0.111253
1638.79	15822	0			0.0135	1.22166	90.4958	74.0759	0.818556	0.01105		2.62314	39.8513	15.1922	0.381223	0.0250933	0.0658232
1718.79	15822	0			0.016031	0.46257	28.8553	62.3804	2.16184	0.034656		3.03289	20.2628	6.68103	0.329718	0.0493514	0.149678
1798.79	15822	0			0.92907	1.11506	1.20018	1.07635	0.896816	0.833205		5.36118	16.1073	3.00443	0.186526	0.0620837	0.332842
1878.79	15822	0			0.004446	0.04314	9.70357	224.933	23.1805	0.103055		0.940034	2.3011	2.44789	1.06379	0.434576	0.408516
1958.79	15822	0			0.007298	0.114163	15.6437	137.029	8.75937	0.063924		1.47189	5.70141	3.87354	0.679401	0.175395	0.258162
2038.79	15822	0			0.013742	0.470046	34.2046	72.7686	2.12745	0.029236		2.63181	20.4541	7.77188	0.379966	0.0488898	0.128669
2118.79	15822	0			0.016464	0.760068	46.1663	60.7396	1.31567	0.021661		3.11435	30.4018	9.76184	0.321095	0.0328928	0.10244
2198.79	15822	0			0.014393	1.3336	92.6578	69.4793	0.749849	0.010792		2.76521	43.7847	15.8341	0.361636	0.022839	0.0631546
2278.79	15822	0			0.008723	0.617446	70.7827	114.638	1.61957	0.014128		1.78806	23.9745	13.4081	0.559266	0.041711	0.0745816
2358.79	15822	0			0.010044	0.592512	58.9936	99.5653	1.68773	0.016951		2.0184	23.6077	11.6962	0.495441	0.0423591	0.0854977
2438.79	15822	0			0.009787	0.329301	33.6482	102.18	3.03673	0.029719		1.93075	14.942	7.73896	0.517933	0.0669254	0.129216
2518.79	15822	0			0.007008	0.195481	27.8929	142.689	5.11559	0.035851		1.42706	9.43092	6.60862	0.70074	0.106034	0.151317
2598.79	15822	0			0.003892	0.092437	23.7527	256.962	10.8182	0.0421		0.865935	4.96019	5.72813	1.15482	0.201605	0.174577
2678.79	15822	0			0.004505	0.087798	19.4892	221.979	11.3898	0.05131		0.985118	4.6874	4.75822	1.01511	0.213338	0.210163
2758.79	15822	0			0.005782	0.34715	60.0351	172.937	2.8806	0.016657		1.2597	15.3555	12.1898	0.793837	0.0651231	0.0820358
2838.79	15822	0			0.008865	0.539378	60.8437	112.803	1.85399	0.016436		1.78855	22.1353	12.3762	0.559113	0.0451766	0.0808005
2918.79	15822	0			0.011026	0.615508	55.8225	90.6934	1.62468	0.017914		2.14554	25.4337	11.8543	0.466084	0.0393179	0.0843579
2998.79	15822	0			0.008586	0.280316	32.6498	116.475	3.56741	0.030628		1.7083	12.9704	7.59259	0.585377	0.0770985	0.131707
3078.79	15822	0			0.009788	0.269027	27.4846	102.163	3.7171	0.036384		1.9295	12.5029	6.47986	0.51827	0.0799816	0.154324
3158.79	15822	0			0.020259	0.630738	31.1332	49.3599	1.58544	0.03212		3.75789	27.3027	7.26543	0.266107	0.0366265	0.137638
3238.79	15822	0			0.026476	1.04435	39.4459	37.7707	0.957533	0.025351		4.85478	44.1612	9.09643	0.205982	0.0226443	0.109933
3318.79	15822	0			0.062964	3.04227	48.3174	15.882	0.328702	0.020696		11.2655	120.416	10.6889	0.0887669	0.00830457	0.0935548
3398.79	15822	0			0.032436	1.05531	32.5352	30.83	0.947587	0.030736		5.89446	44.608	7.56777	0.169651	0.0224175	0.132139
1158.79	15742	0			0.047494	3.02745	63.7441	21.0554	0.330311	0.015688		8.35916	99.0815	11.8531	0.119629	0.0100927	0.0843665
1238.79	15742	0			0.040497	48.7638	1204.13	24.6931	0.020507	0.00083		7.08114	180.636	25.5095	0.14122	0.00553599	0.0392011
1318.79	15742	0			0.004076	0.050633	12.4233	245.359	19.7499	0.080494		0.869399	2.70364	3.10979	1.15022	0.369871	0.321565
1398.79	15742	0			0.005756	0.067814	11.7823	173.744	14.7462	0.084873		1.17645	3.47655	2.95512	0.850014	0.287641	0.338396
1478.79	15742	0			0.003535	0.046355	13.1115	282.853	21.5729	0.076269		0.77261	2.53103	3.27595	1.29431	0.395096	0.305255
1558.79	15742	0			0.005271	0.065559	12.4384	189.729	15.2535	0.080396		1.08572	3.38043	3.11355	0.92105	0.29582	0.321177
1638.79	15742	0			0.002826	0.025392	8.98578	353.889	39.3832	0.111287		0.657394	1.49394	2.27252	1.52116	0.669371	0.440041
1718.79	15742	0			0.00758	0.117049	15.4423	131.929	8.54339	0.064757		1.52742	5.84197	3.82474	0.654701	0.171175	0.261456
1798.79	15742	0			0.005372	0.043036	8.01157	186.162	23.2366	0.12482		1.12135	2.28193	2.03499	0.891782	0.438225	0.491404
1878.79	15742	0			0.008353	0.116168	13.9079	119.723	8.60824	0.071901		1.64441	5.69962	3.46606	0.608121	0.17545	0.288512
1958.79	15742	0			0.007732	0.182985	23.6645	129.325	5.46494	0.042257		1.56123	8.86626	5.67903	0.640521	0.112787	0.176087
2038.79	15742	0			0.009326	0.476387	51.0802	107.224	2.09913	0.019577		1.85928	20.2749	10.9047	0.537842	0.049322	0.0917035
2118.79	15742	0			0.00465	0.056999	12.2588	215.069	17.544	0.081574		1.0213	3.13771	3.07228	0.979149	0.318704	0.325491
2198.79	15742	0			0.00462	0.05201	11.2575	216.448	19.2269	0.08883		1.00798	2.85409	2.8315	0.992085	0.350375	0.35317
2278.79	15742	0			0.006521	0.116104	17.8046	153.35	8.61295	0.056165		1.35659	5.91965	4.36363	0.737143	0.168929	0.229167
2358.79	15742	0			0.00565	0.096709	17.1176	177	10.3403	0.058419		1.17188	4.94672	4.22116	0.853326	0.202154	0.236902
2438.79	15742	0			0.006208	0.128268	20.6615	161.081	7.7962	0.048399		1.27058	6.40069	5.03761	0.787042	0.156233	0.198507
2518.79	15742	0			0.002945	0.033277	11.3	339.578	30.0511	0.088495		0.669056	1.89834	2.83734	1.49464	0.526776	0.352443
2598.79	15742	0			0.007373	0.120185	16.3001	135.625	8.3205	0.061349		1.46407	5.90753	4.03499	0.683025	0.169275	0.247832
2678.79	15742	0			0.003904	0.064504	16.5243	256.175	15.5029	0.060517		0.88326	3.60011	4.07594	1.13217	0.277769	0.245342
2758.79	15742	0			0.005267	0.319134	60.589	189.854	3.13348	0.016505		1.1445	14.4085	12.5894	0.873747	0.0694035	0.0794319
2838.79	15742	0			0.013473	0.575811	42.7379	74.2221	1.73668	0.023398		2.57136	24.5137	9.53334	0.388899	0.0407936	0.104895
2918.79	15742	0			0.009491	0.167746	17.675	105.368	5.9614	0.056577		1.86487	8.09621	4.34144	0.536232	0.123515	0.230338
2998.79	15742	0			0.00497	0.084604	17.0228	201.205	11.8197	0.058745		1.05585	4.4318	4.19736	0.9471	0.225642	0.238245
3078.79	15742	0			0.004647	0.0601	12.9328	215.188	16.6389	0.077323		0.97289	3.14521	3.23285	1.02787	0.317944	0.309325
3158.79	15742	0			0.003759	0.036059	9.59247	266.019	27.7321	0.104248		0.813444	1.96838	2.41981	1.22934	0.508032	0.413256
3238.79	15742	0			0.019559	0.553872	28.3175	51.1264	1.80547	0.035314		3.63115	24.4679	6.73834	0.275395	0.0408698	0.148405
3318.79	15742	0			0.020457	0.477842	23.3583	48.8829	2.09274	0.042811		3.78946	21.4126	5.65058	0.26389	0.0467014	0.176973
3398.79	15742	0			0.059729	1.18986	19.921	16.7424	0.840437	0.050198		10.6843	51.823	4.85039	0.0935952	0.0192964	0.206169
1158.79	15662	0			0.044065	3.31772	75.2912	22.6937	0.301412	0.013282		7.69744	95.0737	12.3513	0.129913	0.0105182	0.0809629
1238.79	15662	0			0.040352	2.85199	70.6779	24.782	0.350632	0.014149		6.99961	77.22	11.032	0.142865	0.01295	0.090645
1318.79	15662	0			0.014761	1.11064	75.2402	67.7451	0.900384	0.013291		2.85463	36.9213	12.9338	0.350309	0.0270846	0.0773165
1398.79	15662	0			0.019916	1.35573	68.0721	50.2105	0.737607	0.01469		3.70507	48.9589	13.214	0.269901	0.0204253	0.0756771
1478.79	15662	0			0.021078	1.18197	56.0766	47.4435	0.846048	0.017833		3.90427	45.0941	11.5499	0.25613	0.0221758	0.0865805
1558.79	15662	0			0.009065	0.332576	36.6867	110.311	3.00683	0.027258		1.80737	15.0472	8.32549	0.55329	0.0664574	0.120113
1638.79	15662	0			0.002033	0.019448	9.56497	491.832	51.4202	0.104548		0.499406	1.20453	2.41193	2.00238	0.830197	0.414605
1718.79	15662	0			0.002112	0.020852	9.87389	473.516	47.9564	0.101277		0.516906	1.28626	2.48838	1.93459	0.777449	0.401868
1798.79	15662	0			0.006793	0.1059	15.589	147.205	9.44286	0.064148		1.36818	5.28788	3.86489	0.730895	0.189112	0.25874
1878.79	15662	0			0.017682	0.623237	35.2469	56.5545	1.60453	0.028371		3.30756	26.7337	8.08261	0.302338	0.0374059	0.123722
1958.79	15662	0			0.015014	0.665028	44.2941	66.6048	1.5037	0.022576		2.84388	27.809	9.77856	0.351633	0.0359595	0.102265
2038.79	15662	0			0.005	0.086715	17.3416	199.983	11.532	0.057665		1.06872	4.56132	4.26802	0.935698	0.219235	0.234301
2118.79	15662	0			0.000232	0.002399	10.3312	4306.43	416.836	0.096794		0.173535	0.451086	2.5994	5.76252	2.21687	0.384705
2198.79	15662	0			0.000263	0.002055	7.81684	3803.13	486.53	0.127929		0.195668	0.387909	1.98248	5.11069	2.57792	0.504418
2278.79	15662	0			0.002543	0.024293	9.55415	393.28	41.1633	0.104667		0.594444	1.4326	2.40999	1.68225	0.698031	0.41494
2358.79	15662	0			0.004116	0.055404	13.4602	242.945	18.0492	0.074293		0.879825	2.95598	3.35974	1.13659	0.338297	0.297642
2438.79	15662	0			0.002073	0.02565	12.3758	482.491	38.9866	0.080803		0.518745	1.60733	3.09849	1.92773	0.622151	0.322738
2518.79	15662	0			0.92907	0.004658	0.005013	1.07635	214.689	199.462		5.36118	0.854962	0.159473	0.186526	1.16964	6.27067
2598.79	15662	0			0.006932	0.128495	18.536	144.255	7.78242	0.053949		1.39532	6.35213	4.55244	0.716679	0.157428	0.219663
2678.79	15662	0			0.007366	0.247633	33.62	135.766	4.03823	0.029744		1.50027	11.6509	7.7659	0.666549	0.0858302	0.128768
2758.79	15662	0			0.014413	0.708052	49.1261	69.382	1.41233	0.020356		2.73919	29.1722	10.6499	0.365071	0.0342792	0.0938975
2838.79	15662	0			0.00439	0.065163	14.8449	227.81	15.3461	0.067363		0.942318	3.47608	3.68886	1.06121	0.287681	0.271087
2918.79	15662	0			0.002582	0.018726	7.25143	387.239	53.4018	0.137904		0.608189	1.12031	1.84204	1.64423	0.892612	0.542877
2998.79	15662	0			0.002712	0.020938	7.72016	368.711	47.7594	0.129531		0.6234	1.21984	1.95675	1.60411	0.81978	0.511051
3078.79	15662	0			0.008169	0.091188	11.1633	122.421	10.9664	0.089579		1.59669	4.47664	2.8037	0.626297	0.223382	0.356671
3158.79	15662	0			0.004883	0.059931	12.2731	204.787	16.6857	0.081479		1.04648	3.21789	3.07497	0.955587	0.310763	0.325206
3238.79	15662	0			0.017669	0.629223	35.611	56.5951	1.58926	0.028081		3.30734	26.8696	8.12423	0.302358	0.0372168	0.123089
3318.79	15662	0			0.01939	0.616953	31.8187	51.5739	1.62087	0.031428		3.60553	26.7004	7.4054	0.277352	0.0374526	0.135037
3398.79	15662	0			0.054529	1.40802	25.8215	18.3389	0.710219	0.038727		9.78282	60.2944	6.1633	0.10222	0.0165853	0.162251
3478.79	15662	0			0.031056	0.582676	18.7622	32.2	1.71622	0.053299		5.65192	25.9286	4.58758	0.176931	0.0385674	0.21798
1158.79	15582	0			0.05952	58.8266	988.354	16.8011	0.016999	0.001012		10.0306	215.383	21.4726	0.0996952	0.0046429	0.0465709
1238.79	15582	0			0.018745	10.4779	558.98	53.3484	0.095439	0.001789		3.60402	48.4368	13.4397	0.277468	0.0206455	0.0744065
1318.79	15582	0			0.035073	2.6316	75.0317	28.5118	0.379997	0.013328		6.18004	72.536	11.7371	0.161811	0.0137863	0.0851997
1398.79	15582	0			0.015166	1.16527	76.8352	65.9378	0.858172	0.013015		2.97598	34.2503	11.5089	0.336024	0.0291968	0.0868891
1478.79	15582	0			0.036387	3.22953	88.7553	27.4824	0.309642	0.011267		6.52573	101.313	15.5252	0.15324	0.00987038	0.0644114
1558.79	15582	0			0.007035	0.324388	46.1088	142.141	3.08273	0.021688		1.51655	14.5703	9.60753	0.659392	0.0686328	0.104085
1638.79	15582	0			0.006016	0.105603	17.5527	166.214	9.4694	0.056971		1.22923	5.31796	4.32624	0.813515	0.188042	0.231147
1718.79	15582	0			0.002148	0.022149	10.3127	465.611	45.1493	0.096968		0.525903	1.3654	2.59629	1.90149	0.732388	0.385165
1798.79	15582	0			0.003432	0.032636	9.51056	291.417	30.6414	0.105146		0.754936	1.81159	2.39966	1.32462	0.552003	0.416726
1878.79	15582	0			0.004789	0.047687	9.95814	208.824	20.9702	0.10042		1.01105	2.53983	2.51208	0.989075	0.393728	0.398077
1958.79	15582	0			0.00589	0.095385	16.1949	169.784	10.4838	0.061748		1.217	4.87366	4.00465	0.821692	0.205185	0.24971
2038.79	15582	0			0.005381	0.079881	14.8453	185.844	12.5186	0.067361		1.11162	4.10197	3.69009	0.89959	0.243785	0.270996
2118.79	15582	0			0.001679	0.012392	7.38176	595.695	80.6983	0.135469		0.443046	0.830051	1.87351	2.2571	1.20474	0.533758
2198.79	15582	0			0.002891	0.025561	8.84182	345.911	39.1222	0.113099		0.670121	1.49926	2.23729	1.49227	0.666997	0.446969
2278.79	15582	0			0.007517	0.167086	22.2291	133.04	5.98494	0.044986		1.49853	8.08849	5.3976	0.667319	0.123632	0.185268
2358.79	15582	0			0.007513	0.17581	23.3998	133.097	5.68797	0.042735		1.50152	8.49206	5.65564	0.665992	0.117757	0.176815
2438.79	15582	0			0.003664	0.07095	19.3624	272.903	14.0945	0.051646		0.806529	3.83118	4.75021	1.23988	0.261016	0.210517
2518.79	15582	0			0.004529	0.077574	17.1279	220.793	12.8909	0.058384		0.974886	4.11704	4.2231	1.02576	0.242893	0.236793
2598.79	15582	0			0.005721	0.153035	26.7488	174.788	6.53444	0.037385		1.21464	7.69296	6.33352	0.823288	0.129989	0.15789
2678.79	15582	0			0.007058	0.624898	88.5365	141.681	1.60026	0.011295		1.47966	23.9089	16.1584	0.675833	0.0418255	0.0618873
2758.79	15582	0			0.010336	0.641744	62.0907	96.7531	1.55825	0.016105		2.04878	25.5528	12.4722	0.488094	0.0391347	0.0801786
2838.79	15582	0			0.008465	0.20783	24.5527	118.138	4.81162	0.040729		1.66958	9.87222	5.91301	0.598954	0.101294	0.169119
2918.79	15582	0			0.002308	0.025759	11.1631	433.36	38.8208	0.089581		0.556204	1.55964	2.80408	1.7979	0.641174	0.356624
2998.79	15582	0			0.000246	0.002137	8.68185	4062.24	467.9	0.115183		0.183612	0.402997	2.19483	5.44627	2.48141	0.455616
3078.79	15582	0			0.004213	0.044793	10.6333	237.388	22.325	0.094044		0.898934	2.40502	2.67541	1.11243	0.415797	0.373775
3158.79	15582	0			0.006882	0.201844	29.3292	145.307	4.95433	0.034096		1.45881	9.86149	6.75994	0.685489	0.101405	0.14793
3238.79	15582	0			0.013063	0.459646	35.1882	76.5549	2.17559	0.028419		2.5371	19.779	7.79591	0.394151	0.0505587	0.128272
3318.79	15582	0			0.022978	1.15046	50.0687	43.5204	0.869215	0.019973		4.23287	45.0033	10.6319	0.236246	0.0222206	0.0940569
3398.79	15582	0			0.023525	0.593233	25.2171	42.5079	1.68568	0.039656		4.33272	26.315	6.07356	0.230802	0.0380011	0.164648
1158.79	15502	0			0.052912	53.9678	1019.95	18.8992	0.01853	0.00098		9.00144	198.605	22.0637	0.111093	0.00503511	0.0453232
1238.79	15502	0			0.043416	2.27257	52.3442	23.033	0.440029	0.019104		7.51964	70.951	9.43543	0.132985	0.0140942	0.105983
1318.79	15502	0			0.02925	1.85915	63.5616	34.1886	0.537881	0.015733		5.26245	59.0985	11.2302	0.190025	0.0169209	0.0890455
1398.79	15502	0			0.030574	1.96326	64.2131	32.7075	0.509358	0.015573		5.4775	61.5049	11.2286	0.182565	0.0162589	0.089058
1478.79	15502	0			0.022082	2.0043	90.7676	45.2864	0.498927	0.011017		4.07935	55.6314	13.6373	0.245137	0.0179755	0.0733282
1558.79	15502	0			0.017027	21.8345	1282.38	58.7319	0.045799	0.00078		3.24951	87.6506	26.9735	0.307739	0.0114089	0.0370734
1638.79	15502	0			0.010493	1.67804	159.914	95.2977	0.595933	0.006253		2.14828	40.7068	18.9486	0.465489	0.0245659	0.0527744
1718.79	15502	0			0.006602	0.178063	26.9698	151.462	5.61598	0.037079		1.37478	8.75309	6.36692	0.727391	0.114245	0.157062
1798.79	15502	0			0.003002	0.029609	9.86177	333.062	33.7731	0.101402		0.690579	1.71808	2.48788	1.44806	0.582046	0.401949
1878.79	15502	0			0.002678	0.021145	7.89543	373.386	47.2914	0.126656		0.622707	1.24629	2.0014	1.60589	0.802384	0.49965
1958.79	15502	0			0.002326	0.01967	8.45751	429.966	50.8384	0.118238		0.564541	1.20894	2.14145	1.77135	0.827173	0.466973
2038.79	15502	0			0.002622	0.032202	12.2822	381.413	31.0542	0.081419		0.610339	1.87717	3.07562	1.63843	0.532716	0.325138
2118.79	15502	0			0.92907	0.004605	0.004956	1.07635	217.168	201.765		5.36118	0.845677	0.157741	0.186526	1.18248	6.33952
2198.79	15502	0			0.002304	0.02492	10.8155	434.01	40.1287	0.09246		0.564409	1.53543	2.72042	1.77177	0.651284	0.36759
2278.79	15502	0			0.004949	0.12079	24.4045	202.041	8.27883	0.040976		1.04148	6.13491	5.89059	0.960176	0.163002	0.169762
2358.79	15502	0			0.00788	0.275621	34.9785	126.908	3.62817	0.028589		1.57884	12.7801	8.0946	0.633377	0.0782469	0.123539
2438.79	15502	0			0.004804	0.150442	31.3173	208.169	6.64708	0.031931		1.05411	7.68257	7.28818	0.948665	0.130165	0.137208
2518.79	15502	0			0.005743	0.27589	48.0378	174.119	3.62463	0.020817		1.23737	12.8269	10.3663	0.808168	0.077961	0.0964663
2598.79	15502	0			0.007265	0.599271	82.4892	137.649	1.6687	0.012123		1.57261	22.3393	14.2053	0.635887	0.0447642	0.0703964
2678.79	15502	0			0.008353	0.6674	79.8961	119.712	1.49835	0.012516		1.7344	24.9267	14.372	0.576569	0.0401176	0.0695798
2758.79	15502	0			0.010266	0.899561	87.6228	97.4062	1.11165	0.011413		2.06525	31.2888	15.1502	0.484204	0.0319603	0.0660059
2838.79	15502	0			0.007397	0.281354	38.0352	135.186	3.55424	0.026291		1.51789	13.0215	8.57869	0.658809	0.076796	0.116568
2918.79	15502	0			0.005575	0.136748	24.5266	179.357	7.31274	0.040772		1.17818	6.92188	5.87506	0.848766	0.144469	0.170211
2998.79	15502	0			0.008754	0.174147	19.8925	114.228	5.74229	0.05027		1.71166	8.33824	4.87145	0.58423	0.119929	0.205278
3078.79	15502	0			0.008065	0.155141	19.2358	123.989	6.44575	0.051986		1.65406	7.7147	4.6641	0.604573	0.129623	0.214403
3158.79	15502	0			0.024589	1.33457	54.2753	40.6687	0.749304	0.018425		4.50482	48.8627	10.8468	0.221984	0.0204655	0.0921934
3238.79	15502	0			0.013415	1.11958	83.457	74.5433	0.893194	0.011982		2.61924	36.9291	14.0992	0.38179	0.0270789	0.0709262
1158.79	15422	0			0.03422	0.65796	19.2273	29.2227	1.51985	0.052009		6.22501	29.3291	4.71149	0.160642	0.0340958	0.212247
1238.79	15422	0			0.016766	0.225312	13.4385	59.6438	4.43828	0.074413		3.13148	10.5044	3.35445	0.319337	0.0951983	0.298112
1318.79	15422	0			0.010934	0.157637	14.4169	91.4561	6.34367	0.069363		2.08649	7.49124	3.59035	0.479273	0.133489	0.278525
1398.79	15422	0			0.005977	0.09009	15.0732	167.312	11.1	0.066343		1.21177	4.53858	3.74542	0.82524	0.220333	0.266993
1478.79	15422	0			0.024041	1.86023	77.3788	41.5964	0.537569	0.012923		4.41035	60.555	13.7302	0.226739	0.0165139	0.0728321
1558.79	15422	0			0.041611	2.51134	60.3533	24.0323	0.398193	0.016569		7.37399	84.5777	11.4697	0.135612	0.0118235	0.0871861
1638.79	15422	0			0.032528	1.85592	57.057	30.7432	0.538816	0.017526		5.8717	67.6312	11.5182	0.170308	0.0147861	0.0868195
1718.79	15422	0			0.019957	1.29855	65.0676	50.1081	0.770093	0.015369		3.71232	47.3812	12.7632	0.269373	0.0211054	0.07835
1798.79	15422	0			0.007353	0.094078	12.794	135.994	10.6295	0.078162		1.48018	4.73598	3.19959	0.675591	0.211149	0.31254
1878.79	15422	0			0.002766	0.020394	7.37198	361.479	49.0343	0.135649		0.63695	1.19181	1.87112	1.56998	0.83906	0.534439
1958.79	15422	0			0.000269	0.002015	7.48926	3716.54	496.25	0.133525		0.200058	0.380478	1.90184	4.99855	2.62827	0.525808
2038.79	15422	0			0.004144	0.037718	9.10269	241.336	26.5127	0.109858		0.881097	2.02579	2.29917	1.13495	0.493634	0.434939
2118.79	15422	0			0.002545	0.025357	9.96509	392.991	39.4367	0.10035		0.600102	1.50728	2.51171	1.66638	0.663446	0.398135
2198.79	15422	0			0.005578	0.118881	21.3114	179.266	8.41175	0.046923		1.15076	5.97752	5.19442	0.868992	0.167293	0.192514
2278.79	15422	0			0.008139	0.246551	30.2929	122.867	4.05595	0.033011		1.62431	11.57	7.12301	0.615645	0.0864305	0.14039
2358.79	15422	0			0.009435	0.353265	37.4435	105.993	2.83074	0.026707		1.8685	15.8684	8.4926	0.535188	0.0630181	0.11775
2438.79	15422	0			0.011071	0.276252	24.9525	90.3252	3.61988	0.040076		2.15528	12.7967	5.93738	0.463976	0.0781449	0.168424
2518.79	15422	0			0.01029	0.322586	31.3503	97.1843	3.09995	0.031898		2.02216	14.6796	7.25935	0.494521	0.0681219	0.137753
2598.79	15422	0			0.015923	1.47912	92.8922	62.8025	0.676079	0.010765		3.0466	45.0417	14.7843	0.328235	0.0222017	0.0676395
2678.79	15422	0			0.020498	1.66528	81.24	48.7845	0.600499	0.012309		3.80686	55.9436	14.6955	0.262684	0.0178751	0.0680481
2758.79	15422	0			0.021718	1.67091	76.938	46.0456	0.598476	0.012997		4.01437	59.6698	14.8641	0.249105	0.0167589	0.0672763
2838.79	15422	0			0.010254	0.840228	81.94	97.5212	1.19015	0.012204		2.05246	30.3332	14.7789	0.487221	0.0329672	0.0676638
2918.79	15422	0			0.01168	0.670468	57.4053	85.6198	1.4915	0.01742		2.29968	26.3101	11.4408	0.434843	0.0380082	0.0874067
2998.79	15422	0			0.012393	0.464593	37.4894	80.693	2.15242	0.026674		2.40331	20.0854	8.35738	0.416092	0.0497874	0.119655
3078.79	15422	0			0.009032	0.344216	38.1109	110.718	2.90515	0.026239		1.8626	15.3437	8.23776	0.536884	0.0651735	0.121392
3158.79	15422	0			0.030394	2.24489	73.8599	32.9013	0.445456	0.013539		5.5072	76.8508	13.9546	0.181581	0.0130122	0.0716609
1238.79	15342	0			0.032781	0.364186	11.1098	30.5057	2.74585	0.090011		5.97243	16.6805	2.79292	0.167436	0.0599502	0.358048
1318.79	15342	0			0.066258	1.60276	24.1895	15.0924	0.623924	0.04134		11.9013	69.5134	5.84081	0.0840242	0.0143857	0.171209
1398.79	15342	0			0.017824	0.194368	10.9046	56.1029	5.14488	0.091704		3.31661	9.0874	2.73997	0.301513	0.110042	0.364968
1478.79	15342	0			0.02361	0.610995	25.8785	42.3547	1.63668	0.038642		4.34672	26.9258	6.19452	0.230058	0.037139	0.161433
1558.79	15342	0			0.007892	0.155723	19.7329	126.718	6.42167	0.050677		1.59568	7.65874	4.79968	0.626693	0.13057	0.208347
1638.79	15342	0			0.007984	0.138824	17.3882	125.254	7.20338	0.05751		1.60419	6.85504	4.27322	0.623369	0.145878	0.234015
1718.79	15342	0			0.003506	0.032765	9.34499	285.21	30.5201	0.107009		0.760555	1.793	2.35749	1.31483	0.557723	0.424179
1798.79	15342	0			0.00244	0.021086	8.64136	409.815	47.4248	0.115723		0.578582	1.26454	2.18559	1.72836	0.7908	0.457543
1878.79	15342	0			0.002183	0.016258	7.4466	458.025	61.5078	0.134289		0.533127	1.00744	1.88968	1.87573	0.992617	0.529191
1958.79	15342	0			0.00201	0.013122	6.52783	497.473	76.2081	0.15319		0.516171	0.858829	1.66385	1.93734	1.16438	0.601018
2038.79	15342	0			0.001698	0.014023	8.25856	588.919	71.3102	0.121086		0.444078	0.928346	2.0905	2.25186	1.07718	0.478354
2118.79	15342	0			0.002034	0.020958	10.3057	491.723	47.7135	0.097033		0.51305	1.33169	2.59564	1.94913	0.750924	0.385262
2198.79	15342	0			0.01077	0.255778	23.7492	92.851	3.90965	0.042107		2.07511	11.9079	5.73846	0.481903	0.0839778	0.174263
2278.79	15342	0			0.01309	0.533023	40.721	76.3964	1.87609	0.024557		2.50777	22.855	9.11368	0.398761	0.0437541	0.109725
2358.79	15342	0			0.007402	0.216455	29.2432	135.101	4.6199	0.034196		1.49613	10.318	6.8965	0.668392	0.0969175	0.145001
2438.79	15342	0			0.003369	0.032923	9.7734	296.853	30.3736	0.102319		0.744172	1.83384	2.46427	1.34378	0.545303	0.405799
2518.79	15342	0			0.002637	0.030593	11.6002	379.174	32.6868	0.086205		0.606482	1.76468	2.9097	1.64885	0.566675	0.343678
2598.79	15342	0			0.018084	1.08089	59.7691	55.2964	0.925168	0.016731		3.40764	38.3163	11.2443	0.293458	0.0260985	0.0889343
2678.79	15342	0			0.014497	19.179	1322.93	68.978	0.05214	0.000756		2.82999	78.4812	27.732	0.353359	0.0127419	0.0360594
2758.79	15342	0			0.014481	0.826805	57.0957	69.0559	1.20948	0.017514		2.80432	30.4659	10.8639	0.356592	0.0328236	0.092048
2838.79	15342	0			0.015592	1.15696	74.2021	64.1353	0.864333	0.013477		2.99146	38.5732	12.8944	0.334285	0.0259248	0.0775528
2918.79	15342	0			0.024339	1.36887	56.2428	41.0871	0.73053	0.01778		4.45944	48.7073	10.9223	0.224243	0.0205308	0.0915559
2998.79	15342	0			0.015003	1.36649	91.081	66.6533	0.731803	0.010979		2.90703	40.7629	14.0222	0.343994	0.0245321	0.0713154
3078.79	15342	0			0.022957	1.17213	51.0575	43.5597	0.853149	0.019586		4.22578	42.6736	10.0984	0.236643	0.0234337	0.0990255
1318.79	15262	0			0.014104	0.264878	18.7798	70.8999	3.77532	0.053249		2.65833	12.2757	4.61781	0.376176	0.081462	0.216553
1398.79	15262	0			0.010763	0.12999	12.0775	92.9113	7.69292	0.082799		2.06679	6.25537	3.02661	0.483842	0.159863	0.330402
1478.79	15262	0			0.00687	0.102628	14.9395	145.57	9.74397	0.066937		1.37355	5.09992	3.71296	0.728042	0.196081	0.269327
1558.79	15262	0			0.001926	0.015213	7.89687	519.094	65.7341	0.126632		0.483654	0.96763	2.00067	2.06759	1.03345	0.499834
1638.79	15262	0			0.001975	0.0182	9.21489	506.31	54.9448	0.10852		0.477119	1.10866	2.32365	2.09591	0.901993	0.430358
1718.79	15262	0			0.002415	0.019881	8.23306	414.123	50.3001	0.121462		0.568953	1.18547	2.0836	1.75761	0.843549	0.47994
1798.79	15262	0			0.002891	0.024422	8.44658	345.864	40.9472	0.118391		0.654669	1.39875	2.13658	1.52749	0.714924	0.468038
1878.79	15262	0			0.004369	0.048059	10.9998	228.882	20.8079	0.090911		0.959703	2.65723	2.7688	1.04199	0.376332	0.361167
1958.79	15262	0			0.00307	0.038388	12.5049	325.75	26.0498	0.079969		0.701958	2.197	3.12982	1.42459	0.455166	0.319507
2038.79	15262	0			0.008097	0.123481	15.2493	123.495	8.09839	0.065577		1.60549	6.07356	3.783	0.622864	0.164648	0.26434
2118.79	15262	0			0.004487	0.072294	16.1109	222.853	13.8325	0.06207		0.956084	3.81375	3.98892	1.04593	0.262209	0.250694
2198.79	15262	0			0.006067	0.074225	12.2346	164.831	13.4725	0.081736		1.24098	3.80357	3.06498	0.805818	0.262911	0.326266
2278.79	15262	0			0.006337	0.101838	16.0711	157.81	9.81947	0.062223		1.299	5.16307	3.97465	0.769824	0.193683	0.251594
2358.79	15262	0			0.004205	0.057953	13.7806	237.789	17.2553	0.072566		0.880964	3.0285	3.43771	1.13512	0.330196	0.290891
2438.79	15262	0			0.000221	0.002078	9.40064	4524.55	481.302	0.106376		0.165425	0.392028	2.36982	6.04502	2.55084	0.421973
2518.79	15262	0			0.007513	0.089663	11.9347	133.106	11.1528	0.083789		1.52659	4.5723	2.99512	0.655057	0.218708	0.333877
2598.79	15262	0			0.007875	0.988039	125.465	126.984	1.01211	0.00797		1.71504	28.9271	16.8667	0.583076	0.0345696	0.0592884
2678.79	15262	0			0.009834	12.8302	1304.7	101.691	0.077941	0.000766		2.06487	56.559	27.3911	0.484292	0.0176806	0.0365082
2758.79	15262	0			0.01786	1.36366	76.3547	55.9924	0.733319	0.013097		3.35678	46.9127	13.9755	0.297905	0.0213162	0.0715537
2838.79	15262	0			0.012558	0.443228	35.2943	79.6302	2.25618	0.028333		2.46686	19.0185	7.70959	0.405374	0.0525805	0.129709
2918.79	15262	0			0.013159	1.71429	130.277	75.9947	0.583334	0.007676		2.61485	42.4126	16.2199	0.382432	0.0235779	0.0616526
2998.79	15262	0			0.029441	1.91833	65.1582	33.9662	0.521287	0.015347		5.34495	68.4377	12.8042	0.187093	0.0146118	0.0780994
1478.79	15182	0			0.01449	0.274772	18.9631	69.0142	3.63939	0.052734		2.74019	12.716	4.64056	0.364939	0.078641	0.215491
1558.79	15182	0			0.008506	0.17038	20.03	117.561	5.86924	0.049925		1.71645	8.32924	4.85259	0.582597	0.120059	0.206076
1638.79	15182	0			0.013574	0.349855	25.7736	73.6693	2.85833	0.038799		2.60939	15.7905	6.0514	0.383231	0.0633293	0.165251
1718.79	15182	0			0.007129	0.114504	16.0614	140.27	8.73335	0.062261		1.47565	5.8431	3.95968	0.677668	0.171142	0.252546
1798.79	15182	0			0.006665	0.155323	23.3036	150.033	6.43819	0.042912		1.40182	7.79187	5.5584	0.713359	0.128339	0.179908
1878.79	15182	0			0.008071	0.234133	29.0108	123.907	4.27107	0.03447		1.6047	11.0324	6.87507	0.62317	0.0906421	0.145453
1958.79	15182	0			0.010458	0.2283	21.8311	95.6246	4.3802	0.045806		2.00599	10.6903	5.32919	0.498507	0.0935428	0.187646
2038.79	15182	0			0.008413	0.190539	22.6478	118.862	5.24827	0.044154		1.65434	9.09355	5.49679	0.604472	0.109968	0.181924
2118.79	15182	0			0.009597	0.264178	27.5265	104.197	3.78532	0.036329		1.87741	12.2871	6.54468	0.532648	0.0813863	0.152796
2198.79	15182	0			0.00642	0.206347	32.1406	155.76	4.84621	0.031113		1.3034	9.87597	7.57708	0.767224	0.101256	0.131977
2278.79	15182	0			0.004124	0.05005	12.1377	242.511	19.9801	0.082388		0.8663	2.63356	3.04001	1.15433	0.379714	0.328946
2358.79	15182	0			0.00025	0.001998	7.99961	4003.13	500.416	0.125006		0.186229	0.377379	2.02642	5.36972	2.64986	0.493481
2438.79	15182	0			0.002495	0.019836	7.9512	400.855	50.4144	0.125767		0.580925	1.16956	2.01327	1.72139	0.855021	0.496703
2518.79	15182	0			0.008485	0.129211	15.229	117.862	7.73929	0.065664		1.70912	6.44139	3.76883	0.585095	0.155246	0.265334
2598.79	15182	0			0.021159	1.06915	50.5301	47.262	0.935324	0.01979		3.92011	40.837	10.4173	0.255095	0.0244876	0.095994
2678.79	15182	0			0.011261	0.946912	84.0855	88.7998	1.05607	0.011893		2.25507	32.0304	14.2037	0.443445	0.0312203	0.0704042
2758.79	15182	0			0.028388	2.21114	77.8903	35.2263	0.452255	0.012839		5.16031	74.2529	14.3892	0.193787	0.0134675	0.0694965
2838.79	15182	0			0.0255	0.981087	38.4741	39.2159	1.01928	0.025991		4.66707	39.6929	8.50489	0.214267	0.0251934	0.117579
1638.79	15102	0			0.01987	1.65902	83.492	50.3261	0.602765	0.011977		3.70369	53.368	14.4094	0.270001	0.0187378	0.069399
1718.79	15102	0			0.018049	1.10118	61.012	55.4059	0.908116	0.01639		3.38569	40.9467	12.0941	0.295361	0.024422	0.0826851
1798.79	15102	0			0.000687	0.106929	155.625	1455.42	9.35204	0.006426		0.483071	9.4441	19.5501	2.07009	0.105886	0.0511506
1878.79	15102	0			0.00473	0.105331	22.2672	211.402	9.49386	0.044909		1.02026	5.49781	5.38864	0.980144	0.181891	0.185575
1958.79	15102	0			0.003283	0.042873	13.0589	304.592	23.3245	0.076576		0.70766	2.30945	3.2635	1.41311	0.433003	0.306419
2038.79	15102	0			0.00519	0.063234	12.1834	192.672	15.8143	0.082079		1.05241	3.21077	3.05088	0.950202	0.311452	0.327774
2118.79	15102	0			0.003541	0.052976	14.9617	282.425	18.8766	0.066837		0.761486	2.83407	3.72176	1.31322	0.352849	0.26869
2198.79	15102	0			0.005405	0.08191	15.1538	185.005	12.2085	0.06599		1.1077	4.17059	3.76511	0.902776	0.239774	0.265597
2278.79	15102	0			0.002631	0.034102	12.9632	380.132	29.3239	0.077141		0.60632	1.96461	3.24021	1.64929	0.509008	0.308622
2358.79	15102	0			0.003736	0.0448	11.9908	267.653	22.3216	0.083398		0.822651	2.47278	3.00587	1.21558	0.404403	0.332682
2438.79	15102	0			0.004772	0.066066	13.8434	209.538	15.1363	0.072236		1.0035	3.46328	3.45119	0.996509	0.288743	0.289755
2518.79	15102	0			0.012386	1.6125	130.192	80.7393	0.620155	0.007681		2.4319	45.8103	18.8372	0.411201	0.0218292	0.0530864
2598.79	15102	0			0.007007	0.921266	131.477	142.714	1.08546	0.007606		1.58189	26.769	16.9221	0.632154	0.0373566	0.0590942
2678.79	15102	0			0.011527	1.50414	130.488	86.752	0.66483	0.007664		2.37304	36.3542	15.3197	0.421401	0.0275071	0.0652754
2758.79	15102	0			0.018809	1.00933	53.6613	53.1651	0.990752	0.018635		3.5235	37.6017	10.6717	0.283809	0.0265946	0.0937059
1718.79	15022	0			0.022297	1.4548	65.2467	44.8491	0.687377	0.015326		4.11481	48.7713	11.8526	0.243025	0.0205039	0.0843694
1798.79	15022	0			0.017987	1.08221	60.1659	55.5957	0.924039	0.016621		3.39559	37.7894	11.129	0.2945	0.0264624	0.0898555
1878.79	15022	0			0.011109	1.02063	91.8768	90.0199	0.979789	0.010884		2.19638	35.1689	16.0122	0.455294	0.0284342	0.0624523
1958.79	15022	0			0.005449	0.109155	20.0326	183.524	9.16124	0.049919		1.14364	5.58994	4.88787	0.874405	0.178893	0.204588
2038.79	15022	0			0.00486	0.064591	13.2901	205.758	15.4821	0.075244		1.02652	3.40641	3.3184	0.974162	0.293564	0.30135
2118.79	15022	0			0.006565	0.092349	14.0674	152.329	10.8285	0.071086		1.32544	4.64475	3.50431	0.754467	0.215297	0.285363
2198.79	15022	0			0.009042	0.190213	21.0364	110.594	5.25727	0.047537		1.79131	9.1314	5.09761	0.55825	0.109512	0.19617
2278.79	15022	0			0.010086	0.62745	62.2083	99.1447	1.59375	0.016075		1.98945	25.4129	12.7739	0.502653	0.0393501	0.0782849
2358.79	15022	0			0.01441	0.907921	63.0073	69.3973	1.10142	0.015871		2.76776	33.7988	12.2116	0.361304	0.0295868	0.0818891
2438.79	15022	0			0.007429	0.90621	121.99	134.616	1.1035	0.008197		1.66237	26.6849	16.0524	0.601552	0.0374743	0.062296
2518.79	15022	0			0.016547	1.86334	112.606	60.4325	0.53667	0.00888		3.15861	50.3692	15.9466	0.316595	0.0198534	0.0627093
2598.79	15022	0			0.022504	1.37907	61.2805	44.4361	0.725126	0.016318		4.14946	47.0148	11.3303	0.240995	0.0212699	0.0882586
1878.79	14942	0			0.025804	35.732	1384.76	38.754	0.027986	0.000722		4.69518	135.638	28.8888	0.212984	0.00737256	0.0346155
1958.79	14942	0			0.012664	17.9734	1419.27	78.9647	0.055638	0.000705		2.51634	74.3186	29.5344	0.397403	0.0134556	0.0338588
2038.79	14942	0			0.017377	1.72682	99.3715	57.546	0.5791	0.010063		3.2813	52.598	16.0296	0.304757	0.0190121	0.0623845
2118.79	14942	0			0.042169	3.86444	91.6425	23.7143	0.25877	0.010912		7.59391	132.374	17.4315	0.131685	0.00755438	0.0573673
2198.79	14942	0			0.012746	1.2737	99.9286	78.4553	0.785113	0.010007		2.47479	42.0686	16.9989	0.404075	0.0237707	0.0588275
2278.79	14942	0			0.021524	1.32943	61.7661	46.4605	0.752201	0.01619		3.98152	49.2964	12.3813	0.251161	0.0202855	0.0807669
2358.79	14942	0			0.033917	1.66591	49.1177	29.484	0.600273	0.020359		6.13552	64.8074	10.5627	0.162985	0.0154303	0.0946731
2438.79	14942	0			0.035073	1.46728	41.8347	28.5118	0.681535	0.023904		6.30043	56.5986	8.98329	0.158719	0.0176683	0.111318
2518.79	14942	0			0.032165	1.86299	57.9198	31.0897	0.536771	0.017265		5.81015	67.7525	11.6611	0.172113	0.0147596	0.0857555
1238.79	12942	0			0.038049	0.707295	18.5889	26.2816	1.41384	0.053796		6.87343	31.2353	4.54436	0.145488	0.032015	0.220053
1318.79	12942	0			0.048708	1.29392	26.5645	20.5303	0.772847	0.037644		8.7486	55.2055	6.31021	0.114304	0.0181141	0.158473
1398.79	12942	0			0.101184	1.86305	18.4125	9.88298	0.536754	0.054311		17.4772	77.7136	4.44656	0.0572173	0.0128678	0.224893
1478.79	12942	0			0.050968	1.70498	33.4517	19.62	0.586518	0.029894		9.11297	70.0133	7.68282	0.109734	0.014283	0.130161
1558.79	12942	0			0.08956	1.53719	17.1638	11.1657	0.650539	0.058262		15.4292	64.318	4.16859	0.0648122	0.0155477	0.239889
1638.79	12942	0			0.036211	0.847592	23.4071	27.616	1.17981	0.042722		6.58409	37.3542	5.6734	0.151881	0.0267707	0.176261
1718.79	12942	0			0.096919	5.78897	59.73	10.3179	0.172742	0.016742		16.8224	196.101	11.6572	0.0594447	0.0050994	0.085784
1798.79	12942	0			0.035976	0.784072	21.7945	27.7966	1.27539	0.045883		6.5221	34.4298	5.27895	0.153325	0.0290446	0.189432
1878.79	12942	0			0.026638	0.400796	15.0458	37.5399	2.49504	0.066464		4.87276	18.164	3.72767	0.205223	0.0550539	0.268264
1958.79	12942	0			0.016472	0.358907	21.789	60.7095	2.78624	0.045895		3.09895	16.2641	5.24826	0.32269	0.061485	0.190539
1158.79	12862	0			0.056451	2.38469	42.2433	17.7144	0.419343	0.023672		9.90589	88.2713	8.91099	0.10095	0.0113287	0.112221
1238.79	12862	0			0.129305	5.71515	44.1991	7.73367	0.174974	0.022625		21.1716	175.752	8.3013	0.047233	0.00568983	0.120463
1318.79	12862	0			0.116246	4.51747	38.8612	8.60243	0.221363	0.025733		18.9179	141.964	7.50425	0.0528601	0.00704402	0.133258
1398.79	12862	0			0.058776	2.9559	50.2912	17.0138	0.338306	0.019884		10.1767	99.2608	9.75376	0.098264	0.0100745	0.102525
1478.79	12862	0			0.046874	2.2123	47.1967	21.3338	0.452019	0.021188		8.30146	81.2868	9.79186	0.120461	0.0123021	0.102126
1558.79	12862	0			0.083455	1.58636	19.0084	11.9824	0.630376	0.052608		14.638	67.3955	4.60415	0.0683154	0.0148378	0.217195
1638.79	12862	0			0.013686	0.147675	10.7904	73.0682	6.77162	0.092675		2.59136	7.0378	2.71588	0.385898	0.14209	0.368205
1718.79	12862	0			0.037273	0.655882	17.5968	26.8291	1.52466	0.056829		6.76882	29.35	4.33606	0.147736	0.0340716	0.230624
1798.79	12862	0			0.012965	0.220984	17.0443	77.1293	4.52522	0.058671		2.48004	10.3978	4.19261	0.403219	0.0961738	0.238515
1878.79	12862	0			0.030795	1.6208	52.6312	32.4724	0.61698	0.019		5.56986	59.9169	10.7573	0.179538	0.0166898	0.0929597
1958.79	12862	0			0.100768	4.52383	44.8935	9.92378	0.221052	0.022275		16.9558	148.512	8.75876	0.0589767	0.00673345	0.114171
2038.79	12862	0			0.070218	39.7505	566.102	14.2414	0.025157	0.001766		11.0156	149.514	13.5729	0.0907803	0.00668834	0.0736761
2118.79	12862	0			0.035978	1.40492	39.0499	27.7951	0.711784	0.025608		6.27575	47.4091	7.55434	0.159343	0.021093	0.132374
2198.79	12862	0			0.044721	2.4131	53.9588	22.3608	0.414406	0.018533		7.56839	66.8596	8.83405	0.132128	0.0149567	0.113198
2278.79	12862	0			0.047896	2.36015	49.2764	20.8785	0.423702	0.020294		8.49505	86.7883	10.2163	0.117716	0.0115223	0.0978825
1078.79	12782	0			0.149258	101.765	681.803	6.6998	0.009827	0.001467		23.107	363.646	15.7375	0.043277	0.00274993	0.0635424
1158.79	12782	0			0.083104	3.36814	40.5293	12.0331	0.2969	0.024673		13.3923	98.9393	7.38779	0.07467	0.0101072	0.135358
1238.79	12782	0			0.107297	51.5384	480.335	9.31996	0.019403	0.002082		15.8933	190.217	11.9683	0.0629196	0.00525716	0.0835537
1318.79	12782	0			0.029731	12.9568	435.798	33.6348	0.07718	0.002295		5.11859	56.9962	11.1351	0.195366	0.017545	0.0898059
1398.79	12782	0			0.050231	21.8633	435.252	19.9078	0.045739	0.002298		7.88772	87.7501	11.1249	0.126779	0.011396	0.0898885
1478.79	12782	0			0.014368	0.940193	65.4382	69.6009	1.06361	0.015282		2.81403	31.6754	11.2562	0.355362	0.0315703	0.0888396
1558.79	12782	0			0.008591	0.116283	13.5359	116.405	8.59973	0.073878		1.70199	5.74627	3.37621	0.587547	0.174026	0.29619
1638.79	12782	0			0.006988	0.09208	13.1768	143.101	10.8601	0.075891		1.4105	4.6421	3.2911	0.708968	0.21542	0.30385
1718.79	12782	0			0.016384	0.326335	19.9175	61.0338	3.06434	0.050207		3.07445	14.9309	4.85645	0.325261	0.066975	0.205912
1798.79	12782	0			0.025606	1.85039	72.2634	39.053	0.540426	0.013838		4.65183	54.0459	11.6182	0.214969	0.0185028	0.0860719
1878.79	12782	0			0.017551	1.34648	76.7198	56.9782	0.742679	0.013034		3.39096	34.9246	10.2993	0.294902	0.0286331	0.0970937
1958.79	12782	0			0.029234	16.5219	565.166	34.2071	0.060526	0.001769		5.11282	69.3063	13.5554	0.195587	0.0144287	0.0737713
2038.79	12782	0			0.018194	1.06459	58.5127	54.9627	0.939329	0.01709		3.41425	39.4974	11.5684	0.29289	0.0253181	0.0864424
2118.79	12782	0			0.01949	2.15766	110.708	51.3094	0.463464	0.009033		3.64068	61.294	16.8359	0.274674	0.0163148	0.0593969
2198.79	12782	0			0.031262	2.57934	82.508	31.9881	0.387697	0.01212		5.63529	80.8459	14.3464	0.177453	0.0123692	0.0697041
2278.79	12782	0			0.042409	2.69712	63.5973	23.5797	0.370766	0.015724		7.34082	77.052	10.4964	0.136225	0.0129783	0.095271
2358.79	12782	0			0.240292	2.35092	9.78361	4.16161	0.425365	0.102212		35.5993	91.8913	2.58127	0.0280904	0.0108824	0.387407
2438.79	12782	0			0.048777	2.14323	43.9392	20.5014	0.466585	0.022759		8.68904	82.6852	9.51604	0.115088	0.0120941	0.105086
918.794	12702	0			0.051431	2.91805	56.7366	19.4433	0.342695	0.017625		9.0533	100.519	11.1031	0.110457	0.00994833	0.0900652
998.794	12702	0			0.018846	1.02915	54.6098	53.0629	0.971674	0.018312		3.5292	38.2146	10.8281	0.28335	0.026168	0.0923522
1078.79	12702	0			0.008814	0.384264	43.5991	113.461	2.60238	0.022936		1.82795	16.701	9.13645	0.547061	0.0598768	0.109452
1158.79	12702	0			0.020468	1.43866	70.2872	48.856	0.695091	0.014227		3.81105	46.3239	12.1552	0.262395	0.0215871	0.0822695
1238.79	12702	0			0.029592	2.26226	76.4476	33.7926	0.442036	0.013081		5.32319	67.5823	12.6958	0.187857	0.0147968	0.078766
1318.79	12702	0			0.023749	1.21465	51.1454	42.1072	0.823285	0.019552		4.35379	42.1687	9.68552	0.229685	0.0237143	0.103247
1398.79	12702	0			0.012228	0.342439	28.0041	81.7783	2.92022	0.035709		2.37116	15.482	6.52928	0.421735	0.0645913	0.153156
1478.79	12702	0			0.007637	0.10913	14.2894	130.939	9.16335	0.069982		1.52905	5.43626	3.55531	0.654	0.18395	0.281269
1558.79	12702	0			0.010348	0.138601	13.3943	96.6392	7.21495	0.074659		2.00582	6.70528	3.3429	0.498548	0.149136	0.299141
1638.79	12702	0			0.014677	0.838636	57.1389	68.1332	1.19241	0.017501		2.8154	31.8983	11.3299	0.35519	0.0313496	0.0882617
1718.79	12702	0			0.015301	1.09827	71.7793	65.3569	0.910526	0.013932		2.99471	33.4573	11.1721	0.333922	0.0298889	0.0895084
1798.79	12702	0			0.056498	51.0327	903.268	17.6998	0.019595	0.001107		9.48004	188.471	19.8808	0.105485	0.00530586	0.0502998
1878.79	12702	0			8.86045	10.6342	1.20018	0.112861	0.094036	0.833205		16.3014	48.9764	3.00443	0.0613444	0.020418	0.332842
1958.79	12702	0			7.87787	9.4549	1.20018	0.126938	0.105765	0.833205		14.9461	44.9044	3.00443	0.0669072	0.0222695	0.332842
2038.79	12702	0			0.009045	0.256039	28.3067	110.556	3.90565	0.035327		1.84381	12.0213	6.51981	0.542355	0.0831857	0.153379
2118.79	12702	0			0.014062	0.361824	25.7309	71.1143	2.76377	0.038864		2.67906	16.3348	6.09719	0.373265	0.0612191	0.16401
2198.79	12702	0			0.007457	0.121004	16.2268	134.101	8.26417	0.061627		1.52135	6.08814	4.00179	0.657309	0.164254	0.249888
2278.79	12702	0			0.034871	1.60592	46.0533	28.6773	0.622697	0.021714		6.21384	57.4329	9.24274	0.160931	0.0174116	0.108193
2358.79	12702	0			0.033907	1.53814	45.3636	29.4926	0.650138	0.022044		6.05656	55.56	9.17353	0.16511	0.0179986	0.109009
2438.79	12702	0			0.034529	2.62037	75.8884	28.9609	0.381625	0.013177		6.10617	73.503	12.0375	0.163769	0.0136049	0.0830738
2518.79	12702	0			0.036492	2.21471	60.6903	27.4032	0.451526	0.016477		6.50473	74.4583	11.4468	0.153734	0.0134303	0.0873608
2598.79	12702	0			0.056098	3.2071	57.17	17.826	0.311808	0.017492		9.79192	106.913	10.9184	0.102125	0.00935344	0.0915882
918.794	12622	0			0.023047	0.974011	42.2623	43.39	1.02668	0.023662		4.24375	38.7417	9.12912	0.23564	0.025812	0.10954
998.794	12622	0			0.020404	0.69939	34.2773	49.0103	1.42982	0.029174		3.78863	29.2578	7.72252	0.263948	0.0341789	0.129491
1078.79	12622	0			0.014197	0.456404	32.1485	70.4386	2.19104	0.031106		2.71614	19.9155	7.33229	0.368169	0.0502121	0.136383
1158.79	12622	0			0.004246	0.053374	12.5697	235.505	18.7359	0.079556		0.910923	2.86526	3.14544	1.09779	0.349009	0.31792
1238.79	12622	0			0.003036	0.030876	10.1698	329.374	32.3874	0.09833		0.689551	1.76673	2.56214	1.45022	0.566018	0.390298
1318.79	12622	0			0.00309	0.033263	10.7636	323.592	30.0635	0.092906		0.6868	1.8582	2.7056	1.45603	0.538154	0.369604
1398.79	12622	0			0.003985	0.060147	15.0929	250.932	16.6258	0.066256		0.867812	3.2527	3.74816	1.15232	0.307437	0.266798
1478.79	12622	0			0.036872	1.5457	41.9205	27.1208	0.646956	0.023855		6.60728	59.4141	8.99222	0.151348	0.016831	0.111207
1558.79	12622	0			0.022205	1.04614	47.1135	45.0357	0.955898	0.021225		4.09908	40.5986	9.90431	0.243957	0.0246314	0.100966
1638.79	12622	0			0.03416	2.9201	85.4826	29.2739	0.342454	0.011698		6.04562	77.5981	12.8354	0.165409	0.0128869	0.0779093
1718.79	12622	0			0.024452	17.7894	727.525	40.8965	0.056213	0.001375		4.44064	73.6831	16.5929	0.225193	0.0135716	0.0602667
1798.79	12622	0			0.035772	24.8392	694.365	27.9544	0.040259	0.00144		6.13713	98.0256	15.9725	0.162942	0.0102014	0.0626075
1878.79	12622	0			5.57535	6.69145	1.20018	0.179361	0.149444	0.833205		11.7701	35.3623	3.00443	0.0849613	0.0282787	0.332842
1958.79	12622	0			0.062596	29.5787	472.535	15.9755	0.033808	0.002116		9.67578	114.391	11.8224	0.103351	0.00874193	0.084585
2038.79	12622	0			0.051982	37.8769	728.654	19.2374	0.026401	0.001372		8.60984	143.044	16.614	0.116146	0.00699085	0.0601901
2118.79	12622	0			0.007673	0.202332	26.3676	130.319	4.94238	0.037925		1.55441	9.72532	6.2566	0.643331	0.102824	0.159831
2198.79	12622	0			0.005534	0.060453	10.9245	180.71	16.5418	0.091538		1.12752	3.09564	2.74552	0.886899	0.323035	0.364229
2278.79	12622	0			0.01648	0.262697	15.9405	60.6803	3.80667	0.062733		3.08985	12.1834	3.94306	0.323641	0.0820786	0.25361
2358.79	12622	0			0.028507	2.73929	96.0935	35.0797	0.365058	0.010407		5.1543	77.3851	15.0137	0.194013	0.0129224	0.0666058
2438.79	12622	0			0.04199	2.65338	63.1906	23.8151	0.376878	0.015825		7.23978	73.9384	10.2128	0.138126	0.0135248	0.0979163
2518.79	12622	0			0.042238	2.35611	55.7814	23.6751	0.424428	0.017927		7.45334	79.3986	10.6528	0.134168	0.0125947	0.0938724
2598.79	12622	0			0.00921	0.148552	16.1302	108.583	6.73164	0.061996		1.78818	7.14512	3.99575	0.559228	0.139956	0.250266
2678.79	12622	0			0.041796	1.82678	43.707	23.9257	0.547411	0.02288		7.516	72.5878	9.65777	0.13305	0.0137764	0.103544
838.794	12542	0			0.128651	4.00211	31.1082	7.77294	0.249868	0.032146		20.9829	136.131	6.48773	0.0476579	0.00734584	0.154137
918.794	12542	0			0.044306	1.86948	42.1944	22.5701	0.534908	0.0237		7.69205	63.8276	8.29787	0.130004	0.0156672	0.120513
998.794	12542	0			0.015098	0.460153	30.4773	66.2328	2.17319	0.032811		2.87197	20.1137	7.00346	0.348193	0.0497174	0.142787
1078.79	12542	0			0.006603	0.096328	14.5875	151.436	10.3812	0.068552		1.34769	4.88624	3.62563	0.742009	0.204657	0.275814
1158.79	12542	0			0.001923	0.01825	9.49131	520.067	54.794	0.10536		0.483272	1.15716	2.39442	2.06923	0.864187	0.417637
1238.79	12542	0			0.001386	0.01298	9.36734	721.666	77.0407	0.106754		0.371249	0.876586	2.36118	2.69361	1.14079	0.423517
1318.79	12542	0			0.002063	0.023501	11.3893	484.626	42.5512	0.087802		0.485316	1.38638	2.85664	2.06051	0.721305	0.350061
1398.79	12542	0			0.010658	0.18825	17.6621	93.8224	5.31207	0.056618		2.03853	8.89169	4.36181	0.490549	0.112465	0.229263
1478.79	12542	0			0.033171	2.1638	65.2317	30.1468	0.46215	0.01533		5.98679	76.6764	12.8076	0.167034	0.0130418	0.0780786
1558.79	12542	0			0.043237	3.08266	71.2974	23.1286	0.324395	0.014026		7.52264	87.3288	11.6088	0.132932	0.011451	0.0861415
1638.79	12542	0			0.042453	29.6539	698.504	23.5553	0.033722	0.001432		7.14335	114.65	16.05	0.13999	0.00872216	0.0623054
1718.79	12542	0			0.92907	1.11506	1.20018	1.07635	0.896816	0.833205		5.36118	16.1073	3.00443	0.186526	0.0620837	0.332842
1798.79	12542	0			0.050469	2.23151	44.2159	19.8143	0.448127	0.022616		8.23648	60.5611	7.35279	0.121411	0.0165122	0.136003
1878.79	12542	0			0.042657	19.8446	465.215	23.4429	0.050392	0.00215		6.91281	80.7795	11.6855	0.144659	0.0123794	0.0855763
1958.79	12542	0			0.06216	33.1675	533.58	16.0874	0.03015	0.001874		9.77926	126.783	12.9645	0.102257	0.00788749	0.0771339
2038.79	12542	0			0.021207	19.6785	927.921	47.154	0.050817	0.001078		3.94287	80.206	20.342	0.253622	0.0124679	0.0491593
2118.79	12542	0			0.003147	0.035654	11.3302	317.781	28.0472	0.088259		0.730059	2.07859	2.84715	1.36975	0.481096	0.351228
2198.79	12542	0			0.0023	0.024776	10.7731	434.824	40.3619	0.092823		0.548631	1.48585	2.70828	1.82272	0.673016	0.369238
2278.79	12542	0			0.004285	0.061512	14.3549	233.369	16.2571	0.069663		0.919273	3.28461	3.57305	1.08782	0.30445	0.279873
2358.79	12542	0			0.018763	0.481127	25.6422	53.2961	2.07845	0.038998		3.50636	21.0821	6.01254	0.285196	0.0474336	0.166319
2438.79	12542	0			0.013417	0.963362	71.8038	74.5346	1.03803	0.013927		2.6911	30.1775	11.2138	0.371595	0.0331372	0.0891758
2518.79	12542	0			0.023591	2.31953	98.3225	42.389	0.431122	0.010171		4.32301	57.595	13.3229	0.23132	0.0173626	0.0750588
2598.79	12542	0			0.023107	1.28161	55.4631	43.2762	0.780269	0.01803		4.2548	48.5743	11.4163	0.235029	0.020587	0.0875937
2678.79	12542	0			0.031538	0.724174	22.962	31.7079	1.38088	0.04355		5.73501	31.6805	5.52406	0.174368	0.0315652	0.181026
758.794	12462	0			0.052026	33.9568	652.687	19.2211	0.029449	0.001532		8.52432	129.508	15.1928	0.117311	0.00772151	0.0658206
838.794	12462	0			0.039331	2.14661	54.5783	25.4254	0.465851	0.018322		6.87706	67.3951	9.79998	0.145411	0.0148379	0.102041
918.794	12462	0			0.052755	3.46662	65.7113	18.9554	0.288465	0.015218		9.07268	100.463	11.0731	0.110221	0.00995395	0.090309
998.794	12462	0			0.03285	2.34475	71.3782	30.4417	0.426485	0.01401		5.87498	72.9734	12.421	0.170213	0.0137036	0.0805085
1078.79	12462	0			0.022604	1.1014	48.7261	44.24	0.907934	0.020523		4.16746	42.2604	10.1406	0.239954	0.0236628	0.0986137
1158.79	12462	0			0.010093	0.356379	35.3084	99.0754	2.806	0.028322		2.00529	15.9444	7.95114	0.49868	0.0627181	0.125768
1238.79	12462	0			0.003978	0.0458	11.5126	251.366	21.834	0.086861		0.852498	2.46285	2.88898	1.17302	0.406034	0.346143
1318.79	12462	0			0.00501	0.069844	13.9404	199.593	14.3175	0.071734		1.01336	3.52369	3.47725	0.986821	0.283794	0.287584
1398.79	12462	0			0.013764	0.588332	42.7439	72.6527	1.69972	0.023395		2.60951	25.3053	9.69732	0.383213	0.0395174	0.103121
1478.79	12462	0			0.02147	1.15511	53.8025	46.5776	0.865715	0.018587		3.97352	43.2529	10.8853	0.251666	0.0231198	0.0918671
1558.79	12462	0			0.029776	36.0046	1209.19	33.5844	0.027774	0.000827		5.33425	136.579	25.6043	0.187468	0.00732174	0.039056
1638.79	12462	0			0.046382	2.69043	58.0061	21.5601	0.371687	0.01724		7.84051	72.5987	9.25943	0.127543	0.0137744	0.107998
1718.79	12462	0			0.026292	13.6276	518.312	38.0339	0.07338	0.001929		4.67808	59.3126	12.6788	0.213763	0.0168598	0.0788716
1798.79	12462	0			0.047577	25.3428	532.671	21.0187	0.039459	0.001877		7.70532	99.7645	12.9475	0.12978	0.0100236	0.0772351
1878.79	12462	0			0.074945	47.2918	631.019	13.3431	0.021145	0.001585		11.8718	175.554	14.7874	0.0842331	0.00569627	0.067625
1958.79	12462	0			0.03527	33.2269	942.08	28.3529	0.030096	0.001061		6.1624	126.988	20.6069	0.162274	0.00787475	0.0485274
2038.79	12462	0			0.002853	0.036575	12.8193	350.494	27.3411	0.078007		0.649287	2.08126	3.20545	1.54015	0.480479	0.311969
2118.79	12462	0			0.005183	0.07598	14.659	192.931	13.1613	0.068218		1.05607	3.85359	3.64898	0.946903	0.259498	0.274049
2198.79	12462	0			0.007746	0.155957	20.1329	129.093	6.41204	0.04967		1.52078	7.5111	4.939	0.657559	0.133136	0.20247
2278.79	12462	0			0.003439	0.052669	15.3147	290.774	18.9866	0.065297		0.776445	2.95015	3.79957	1.28792	0.338965	0.263188
2358.79	12462	0			0.012378	0.2927	23.6464	80.787	3.41646	0.04229		2.37424	13.4834	5.67903	0.421188	0.0741654	0.176086
2438.79	12462	0			0.005988	0.090955	15.1901	167.007	10.9945	0.065833		1.23898	4.66799	3.76762	0.807117	0.214225	0.26542
2518.79	12462	0			0.003571	0.054915	15.3801	280.07	18.21	0.065019		0.77879	2.97454	3.81944	1.28404	0.336186	0.261819
2598.79	12462	0			0.010462	0.314111	30.0243	95.585	3.18359	0.033306		2.05234	14.3431	6.98865	0.487248	0.0697198	0.143089
2678.79	12462	0			0.014306	0.35173	24.5863	69.9013	2.84309	0.040673		2.70686	15.9824	5.9044	0.369432	0.062569	0.169365
2758.79	12462	0			0.02529	0.520457	20.5794	39.541	1.92139	0.048592		4.64539	23.3424	5.02485	0.215267	0.0428405	0.199011
758.794	12382	0			0.0301	1.30769	43.4444	33.2223	0.764709	0.023018		5.40933	47.3935	8.76144	0.184866	0.0210999	0.114136
838.794	12382	0			0.013095	0.211712	16.1678	76.3671	4.7234	0.061851		2.51338	10.014	3.98425	0.39787	0.0998607	0.250988
918.794	12382	0			0.016795	0.507982	30.2455	59.5404	1.96857	0.033063		3.15314	22.2617	7.06017	0.317144	0.0449202	0.14164
998.794	12382	0			0.023283	1.12507	48.3227	42.9507	0.88883	0.020694		4.28551	44.2003	10.3139	0.233344	0.0226243	0.0969566
1078.79	12382	0			0.02173	1.63932	75.4385	46.0183	0.610011	0.013256		4.02059	51.1982	12.734	0.24872	0.0195319	0.0785298
1158.79	12382	0			0.030741	1.71447	55.7712	32.5296	0.583269	0.01793		5.53945	60.071	10.8442	0.180523	0.016647	0.0922151
1238.79	12382	0			0.009402	0.694015	73.8148	106.359	1.44089	0.013547		1.93102	25.6477	13.2819	0.51786	0.0389899	0.0752905
1318.79	12382	0			0.004839	0.062281	12.8716	206.67	16.0562	0.07769		1.01152	3.25517	3.2181	0.988614	0.307204	0.310742
1398.79	12382	0			0.002231	0.019997	8.9628	448.208	50.0075	0.111572		0.53641	1.21441	2.26395	1.86424	0.823446	0.441705
1478.79	12382	0			0.008823	0.165119	18.7144	113.339	6.05624	0.053435		1.71184	7.88929	4.60867	0.584168	0.126754	0.216982
1558.79	12382	0			0.022305	31.6068	1417.04	44.8334	0.031639	0.000706		4.11607	121.394	29.4927	0.24295	0.00823764	0.0339067
1638.79	12382	0			0.012791	1.14435	89.4659	78.1804	0.873856	0.011177		2.62427	30.9822	11.806	0.381058	0.0322766	0.0847026
1718.79	12382	0			0.05521	39.1556	709.212	18.1126	0.025539	0.00141		9.07427	147.46	16.2503	0.110202	0.00678151	0.0615373
1798.79	12382	0			0.054573	31.5089	577.371	18.3241	0.031737	0.001732		8.7825	121.056	13.7837	0.113863	0.00826066	0.0725492
1878.79	12382	0			0.029911	19.5179	652.538	33.4327	0.051235	0.001532		5.24368	79.6516	15.19	0.190706	0.0125547	0.0658328
1958.79	12382	0			0.008414	0.272733	32.4153	118.854	3.66659	0.03085		1.68702	12.6654	7.50757	0.592761	0.0789551	0.133199
2038.79	12382	0			0.0027	0.034438	12.7532	370.327	29.0379	0.078411		0.603593	1.92505	3.18931	1.65674	0.519467	0.313547
2118.79	12382	0			0.00904	0.275916	30.5211	110.617	3.62429	0.032764		1.76585	12.7775	7.23586	0.566299	0.0782628	0.138201
2198.79	12382	0			0.013104	0.713584	54.4566	76.3143	1.40138	0.018363		2.51191	29.0303	11.5571	0.398104	0.0344468	0.086527
2278.79	12382	0			0.009025	0.261054	28.9259	110.805	3.83063	0.034571		1.78996	12.1744	6.80152	0.558672	0.0821392	0.147026
2358.79	12382	0			0.009939	0.212742	21.4041	100.611	4.70054	0.04672		1.93034	10.0498	5.20621	0.518043	0.0995047	0.192078
2438.79	12382	0			0.011936	0.254405	21.3137	83.7784	3.93074	0.046918		2.29044	11.8497	5.17355	0.436598	0.0843904	0.193291
2518.79	12382	0			0.006018	0.134992	22.4317	166.171	7.40785	0.04458		1.23073	6.70338	5.44668	0.812528	0.149179	0.183598
2598.79	12382	0			0.011648	0.247414	21.2406	85.8503	4.04181	0.04708		2.23678	11.5462	5.16195	0.447071	0.0866089	0.193725
2678.79	12382	0			0.021455	0.558449	26.0292	46.6099	1.79068	0.038418		3.96606	24.7592	6.24277	0.252139	0.040389	0.160185
2758.79	12382	0			0.014882	0.296365	19.9137	67.1932	3.37422	0.050217		2.80128	13.6489	4.87239	0.356979	0.0732658	0.205238
2838.79	12382	0			0.026102	0.988342	37.8649	38.3116	1.0118	0.02641		4.78764	41.8947	8.7506	0.208871	0.0238694	0.114278
758.794	12302	0			0.02397	0.731023	30.4979	41.7195	1.36795	0.032789		4.40212	30.6481	6.96212	0.227163	0.0326285	0.143634
838.794	12302	0			0.015372	0.238825	15.5366	65.0541	4.18717	0.064364		2.9201	11.1925	3.83291	0.342454	0.0893458	0.260899
918.794	12302	0			0.014886	0.354323	23.803	67.1789	2.82228	0.042011		2.85707	15.9177	5.57131	0.350008	0.0628233	0.179491
998.794	12302	0			0.053548	3.02804	56.5483	18.6749	0.330247	0.017684		9.41992	104.72	11.1169	0.106158	0.00954927	0.0899533
1078.79	12302	0			0.024885	1.51273	60.7892	40.1851	0.661058	0.01645		4.55216	52.6671	11.5697	0.219676	0.0189872	0.0864328
1158.79	12302	0			0.019927	2.08119	104.443	50.1841	0.480494	0.009575		3.7195	57.6402	15.4968	0.268853	0.017349	0.0645296
1238.79	12302	0			0.0153	1.38246	90.3545	65.3579	0.723349	0.011068		2.97678	39.2332	13.1798	0.335933	0.0254886	0.0758739
1318.79	12302	0			0.014401	1.21455	84.3372	69.4391	0.823351	0.011857		2.78436	39.6054	14.2242	0.359149	0.0252491	0.0703025
1398.79	12302	0			0.00632	0.087191	13.7961	158.228	11.4691	0.072484		1.3007	4.47185	3.43804	0.768817	0.223621	0.290864
1478.79	12302	0			0.000224	0.001996	8.90843	4463.93	501.09	0.112253		0.167602	0.376882	2.24867	5.96651	2.65335	0.444707
1558.79	12302	0			0.017125	0.386771	22.5851	58.394	2.58551	0.044277		3.20167	17.5096	5.46891	0.312337	0.0571115	0.182852
1638.79	12302	0			0.019383	1.65551	85.4119	51.5925	0.604043	0.011708		3.62992	49.8611	13.7361	0.275488	0.0200557	0.0728007
1718.79	12302	0			0.012002	0.99894	83.2305	83.3189	1.00106	0.012015		2.51656	28.0383	11.1415	0.397368	0.0356655	0.0897543
1798.79	12302	0			0.05787	46.7607	808.033	17.2802	0.021385	0.001238		9.59825	173.72	18.0991	0.104186	0.0057564	0.0552514
1878.79	12302	0			0.055283	40.8659	739.213	18.0887	0.02447	0.001353		9.1226	153.365	16.8116	0.109618	0.00652038	0.0594828
1958.79	12302	0			0.008561	0.726477	84.8593	116.809	1.37651	0.011784		1.78374	26.11	14.6378	0.560621	0.0382995	0.0683163
2038.79	12302	0			0.005593	0.131816	23.5661	178.78	7.58631	0.042434		1.15574	6.59039	5.70231	0.865247	0.151736	0.175367
2118.79	12302	0			0.009372	0.332161	35.4404	106.697	3.01059	0.028216		1.85689	15.0475	8.10364	0.538536	0.0664561	0.123401
2198.79	12302	0			0.003893	0.058469	15.0178	256.851	17.1031	0.066587		0.875868	3.26347	3.72598	1.14172	0.306423	0.268386
2278.79	12302	0			0.013744	0.538873	39.2076	72.7585	1.85572	0.025505		2.6228	23.1256	8.81716	0.381272	0.043242	0.113415
2358.79	12302	0			0.00486	0.062645	12.8897	205.756	15.9628	0.077581		1.0195	3.28529	3.22245	0.980872	0.304387	0.310323
2438.79	12302	0			0.004359	0.055721	12.7838	229.425	17.9465	0.078224		0.913954	2.92177	3.19685	1.09415	0.342258	0.312808
2518.79	12302	0			0.002099	0.024213	11.535	476.388	41.2993	0.086693		0.5164	1.49462	2.89431	1.93648	0.669065	0.345505
2598.79	12302	0			0.002955	0.034239	11.5875	338.427	29.2062	0.0863		0.659173	1.91573	2.90627	1.51705	0.521993	0.344084
2678.79	12302	0			0.015097	0.467361	30.9562	66.2363	2.13967	0.032304		2.84416	20.7447	7.29379	0.351597	0.0482051	0.137103
2758.79	12302	0			0.014951	0.407417	27.2497	66.884	2.45449	0.036698		2.83361	18.1922	6.42015	0.352907	0.0549686	0.15576
2838.79	12302	0			0.028623	1.3367	46.6998	34.9365	0.748109	0.021413		5.21756	53.1497	10.1867	0.191661	0.0188148	0.0981672
758.794	12222	0			0.025577	0.835822	32.6782	39.0971	1.19643	0.030601		4.68772	35.3641	7.54399	0.213323	0.0282772	0.132556
838.794	12222	0			0.016851	0.727704	43.1848	59.3439	1.37419	0.023156		3.19011	28.9926	9.08827	0.313469	0.0344916	0.110032
918.794	12222	0			0.052515	2.88693	54.974	19.0423	0.346388	0.01819		9.08854	92.3133	10.1571	0.110029	0.0108327	0.0984532
998.794	12222	0			0.009238	0.435491	47.1427	108.252	2.29626	0.021212		1.8681	18.6557	9.98649	0.535304	0.0536028	0.100135
1078.79	12222	0			0.013297	0.377864	28.4179	75.2067	2.64645	0.035189		2.55059	16.9329	6.63881	0.392066	0.0590567	0.150629
1158.79	12222	0			0.017146	0.909053	53.0191	58.3234	1.10005	0.018861		3.23868	34.5073	10.6547	0.308768	0.0289793	0.0938549
1238.79	12222	0			0.01603	0.981064	61.2036	62.3849	1.0193	0.016339		3.06392	34.9093	11.3937	0.32638	0.0286456	0.0877678
1318.79	12222	0			0.024994	2.01551	80.6388	40.0092	0.496153	0.012401		4.56517	61.3188	13.4319	0.21905	0.0163082	0.0744497
1398.79	12222	0			0.013396	0.375268	28.0134	74.6491	2.66476	0.035697		2.55815	16.8798	6.59842	0.390907	0.0592425	0.151551
1478.79	12222	0			0.00487	0.052247	10.728	205.333	19.1398	0.093214		0.989148	2.66548	2.69473	1.01097	0.375166	0.371095
1558.79	12222	0			0.000236	0.001884	7.98046	4235.69	530.758	0.125306		0.176338	0.356247	2.02024	5.67092	2.80704	0.49499
1638.79	12222	0			0.00024	0.002055	8.54825	4160.63	486.724	0.116983		0.179414	0.387759	2.16125	5.5737	2.57892	0.462695
1718.79	12222	0			0.002278	0.020532	9.01173	438.912	48.7045	0.110966		0.581563	1.32767	2.28293	1.7195	0.753201	0.438034
1798.79	12222	0			0.014347	0.876166	61.0687	69.6999	1.14134	0.016375		2.74539	33.5628	12.2252	0.364247	0.0297949	0.0817985
1878.79	12222	0			0.037496	47.2243	1259.46	26.6697	0.021176	0.000794		6.60476	175.32	26.5446	0.151406	0.00570384	0.0376725
1958.79	12222	0			0.026836	29.091	1084.01	37.2629	0.034375	0.000922		4.84505	112.707	23.2623	0.206396	0.00887258	0.042988
2038.79	12222	0			0.0183	2.20477	120.481	54.6458	0.453563	0.0083		3.44461	58.809	17.0728	0.290309	0.0170042	0.0585728
2118.79	12222	0			0.004078	0.052919	12.9774	245.231	18.8968	0.077057		0.869238	2.81947	3.24361	1.15043	0.354677	0.308298
2198.79	12222	0			0.003454	0.040137	11.6201	289.51	24.9145	0.086058		0.751155	2.1892	2.91445	1.33128	0.456788	0.343118
2278.79	12222	0			0.002686	0.03668	13.6544	372.262	27.2631	0.073236		0.614381	2.09319	3.407	1.62765	0.477739	0.293514
2358.79	12222	0			0.012531	0.261362	20.8569	79.8006	3.82611	0.047946		2.38093	12.1308	5.09499	0.420004	0.0824347	0.196271
2438.79	12222	0			0.004699	0.062461	13.2934	212.828	16.01	0.075225		0.984814	3.26921	3.31962	1.01542	0.305885	0.301239
2518.79	12222	0			0.001972	0.022068	11.193	507.215	45.3154	0.089342		0.487452	1.36997	2.81047	2.05148	0.729944	0.355813
2598.79	12222	0			0.92907	1.11506	1.20018	1.07635	0.896816	0.833205		5.36118	16.1073	3.00443	0.186526	0.0620837	0.332842
2678.79	12222	0			0.005561	0.09059	16.2904	179.826	11.0388	0.061386		1.13837	4.59219	4.034	0.878449	0.217761	0.247893
2758.79	12222	0			0.002889	0.035111	12.1515	346.087	28.4809	0.082294		0.698145	2.12651	3.04595	1.43237	0.470253	0.328305
2838.79	12222	0			0.01005	0.297764	29.6284	99.5031	3.35837	0.033751		1.99865	13.6728	6.84103	0.500337	0.0731376	0.146177
2918.79	12222	0			0.032587	2.35431	72.246	30.6867	0.424753	0.013842		5.81649	71.0414	12.2138	0.171925	0.0140763	0.0818746
678.794	12142	0			0.033978	1.49087	43.8781	29.4311	0.670748	0.02279		6.15243	59.6193	9.69038	0.162538	0.0167731	0.103195
758.794	12142	0			0.019114	1.08692	56.8638	52.3167	0.920035	0.017586		3.58745	37.8067	10.5386	0.278749	0.0264503	0.0948892
838.794	12142	0			0.042347	51.4999	1216.13	23.6142	0.019418	0.000822		7.38648	190.084	25.734	0.135382	0.00526084	0.0388591
918.794	12142	0			0.01298	10.1894	785.034	77.0442	0.098141	0.001274		2.68499	47.4406	17.6688	0.372441	0.021079	0.0565969
998.794	12142	0			0.04786	3.75909	78.5441	20.8944	0.266021	0.012732		8.40323	112.736	13.4158	0.119002	0.00887024	0.0745387
1078.79	12142	0			0.030792	2.54375	82.6096	32.4756	0.393121	0.012105		5.55719	80.0737	14.409	0.179947	0.0124885	0.0694009
1158.79	12142	0			0.023317	1.22748	52.6435	42.8876	0.814681	0.018996		4.29018	46.5788	10.8571	0.23309	0.021469	0.0921059
1238.79	12142	0			0.007765	0.701533	90.3401	128.775	1.42545	0.011069		1.64097	25.2785	15.4046	0.609395	0.0395593	0.0649157
1318.79	12142	0			0.014741	1.11959	75.9503	67.8377	0.893186	0.013167		2.81347	40.2713	14.3137	0.355433	0.0248316	0.0698629
1398.79	12142	0			0.009201	0.619491	67.3307	108.687	1.61423	0.014852		1.86881	24.2212	12.9608	0.5351	0.0412862	0.0771559
1478.79	12142	0			0.000232	0.002129	9.1974	4319.13	469.604	0.108726		0.173041	0.401568	2.32066	5.77898	2.49024	0.430912
1558.79	12142	0			0.92907	0.001792	0.001928	1.07635	558.168	518.577		5.36118	0.339093	0.0632497	0.186526	2.94904	15.8104
1638.79	12142	0			0.002213	0.01681	7.59518	451.829	59.4889	0.131662		0.532185	1.02458	1.92523	1.87905	0.976011	0.519419
1718.79	12142	0			0.000264	0.001657	6.27818	3787.87	603.339	0.159282		0.196428	0.314164	1.59938	5.09093	3.18306	0.62524
1798.79	12142	0			0.002403	0.023599	9.82035	416.126	42.3738	0.101829		0.570368	1.41194	2.47549	1.75325	0.708244	0.40396
1878.79	12142	0			8.98381	10.7822	1.20018	0.111311	0.092745	0.833205		16.4716	49.4876	3.00443	0.0607107	0.0202071	0.332842
1958.79	12142	0			0.016596	16.3572	985.597	60.2545	0.061135	0.001015		3.20889	68.7379	21.4211	0.311634	0.014548	0.046683
2038.79	12142	0			0.008321	0.873635	104.994	120.18	1.14464	0.009524		1.76566	28.295	16.0251	0.566359	0.035342	0.062402
2118.79	12142	0			0.081516	1.11506	13.679	12.2675	0.896816	0.073105		4.97463	16.1073	3.23789	0.20102	0.0620837	0.308843
2198.79	12142	0			0.002045	0.023015	11.2537	488.975	43.4502	0.08886		0.486185	1.37293	2.82387	2.05683	0.728371	0.354123
2278.79	12142	0			0.002652	0.0346	13.0471	377.08	28.9013	0.076645		0.6001	1.95668	3.26059	1.66639	0.511069	0.306693
2358.79	12142	0			0.003618	0.062252	17.2054	276.385	16.0638	0.058121		0.787223	3.34728	4.25201	1.27029	0.29875	0.235183
2438.79	12142	0			0.004834	0.126912	26.2559	206.882	7.87946	0.038087		1.02933	6.47059	6.2862	0.971503	0.154545	0.159079
2518.79	12142	0			0.008449	0.159951	18.9311	118.356	6.25192	0.052823		1.66979	7.74578	4.63877	0.598877	0.129102	0.215574
2598.79	12142	0			0.0069	0.117095	16.9704	144.928	8.54007	0.058926		1.3655	5.73445	4.19952	0.732331	0.174385	0.238123
2678.79	12142	0			0.006471	0.116402	17.987	154.525	8.59092	0.055596		1.28895	5.72277	4.43987	0.775825	0.174741	0.225232
2758.79	12142	0			0.002247	0.023258	10.3523	445.109	42.9961	0.096597		0.547488	1.42705	2.60654	1.82652	0.700747	0.38365
2838.79	12142	0			0.010405	0.253895	24.401	96.1068	3.93864	0.040982		2.03937	11.8654	5.81817	0.490347	0.0842785	0.171875
2918.79	12142	0			0.02078	1.22501	58.95	48.1221	0.816319	0.016964		3.86517	41.0654	10.6245	0.258721	0.0243514	0.0941223
678.794	12062	0			0.05581	2.8027	50.2188	17.918	0.356799	0.019913		9.81248	100.296	10.2213	0.101911	0.00997045	0.0978348
758.794	12062	0			0.015766	1.13353	71.8987	63.429	0.8822	0.013908		3.07131	34.1687	11.1251	0.325594	0.0292665	0.0898864
838.794	12062	0			0.030856	1.21027	39.2236	32.4089	0.826262	0.025495		5.52258	44.3118	8.02376	0.181075	0.0225673	0.12463
918.794	12062	0			0.017142	1.21776	71.0412	58.3376	0.82118	0.014076		3.2522	40.6358	12.4949	0.307484	0.0246089	0.0800329
998.794	12062	0			0.005729	0.114124	19.9221	174.565	8.76237	0.050196		1.23201	5.95039	4.82983	0.811683	0.168056	0.207047
1078.79	12062	0			0.003024	0.041323	13.6664	330.721	24.1996	0.073172		0.671021	2.28824	3.41009	1.49027	0.437016	0.293247
1158.79	12062	0			0.004029	0.065001	16.1317	248.175	15.3843	0.06199		0.844553	3.38057	4.00279	1.18406	0.295808	0.249826
1238.79	12062	0			0.0003	0.00642	21.3997	3333.07	155.754	0.04673		0.222128	1.15697	5.20859	4.5019	0.864323	0.191991
1318.79	12062	0			0.011975	0.468559	39.1281	83.5073	2.1342	0.025557		2.30671	20.4501	8.86548	0.433517	0.0488994	0.112797
1398.79	12062	0			0.013886	1.15462	83.1518	72.0168	0.866088	0.012026		2.6507	42.0796	15.8749	0.377258	0.0237645	0.0629927
1478.79	12062	0			0.007469	0.189323	25.3469	133.882	5.28198	0.039452		1.54241	9.2386	5.98973	0.648337	0.108242	0.166953
1558.79	12062	0			0.006603	0.06238	9.44772	151.454	16.0307	0.105846		1.33394	3.18461	2.38737	0.749659	0.314011	0.418871
1638.79	12062	0			0.004252	0.050071	11.7756	235.179	19.9717	0.084922		0.881483	2.60155	2.95133	1.13445	0.384387	0.33883
1718.79	12062	0			0.003295	0.035582	10.7974	303.45	28.104	0.092615		0.717201	1.94582	2.71307	1.39431	0.513922	0.368586
1798.79	12062	0			0.92907	0.001854	0.001996	1.07635	539.326	501.072		5.36118	0.350701	0.0654149	0.186526	2.85143	15.287
1878.79	12062	0			0.008443	0.213407	25.2753	118.437	4.68587	0.039564		1.68794	10.1698	6.02498	0.592439	0.0983303	0.165976
1958.79	12062	0			0.025254	1.45685	57.6876	39.5974	0.686411	0.017335		4.6345	57.2467	12.3523	0.215773	0.0174682	0.0809566
2038.79	12062	0			9.57605	0.039201	0.004094	0.104427	25.5092	244.278		17.2885	2.27169	0.131399	0.057842	0.440201	7.61041
2118.79	12062	0			0.005977	0.089512	14.9761	167.308	11.1716	0.066773		1.2004	4.47097	3.72456	0.833054	0.223665	0.268488
2198.79	12062	0			0.003119	0.06117	19.6132	320.633	16.3478	0.050986		0.712484	3.42441	4.8063	1.40354	0.292021	0.20806
2278.79	12062	0			0.006563	0.164721	25.0983	152.368	6.07086	0.039843		1.33539	8.05272	6.03024	0.748845	0.124182	0.165831
2358.79	12062	0			0.009037	0.302553	33.481	110.662	3.30521	0.029868		1.78897	13.8753	7.75603	0.558982	0.0720706	0.128932
2438.79	12062	0			0.010819	0.485839	44.9052	92.428	2.05829	0.022269		2.10848	20.9262	9.92478	0.474275	0.0477869	0.100758
2518.79	12062	0			0.006927	0.133606	19.2884	144.368	7.48469	0.051845		1.40964	6.64472	4.71378	0.709402	0.150496	0.212144
2598.79	12062	0			0.002063	0.024454	11.8537	484.735	40.893	0.084361		0.484137	1.43792	2.97007	2.06553	0.695449	0.336692
2678.79	12062	0			0.002145	0.022844	10.6495	466.177	43.7744	0.093901		0.511531	1.36931	2.67688	1.95491	0.730297	0.37357
2758.79	12062	0			0.92907	0.003332	0.003586	1.07635	300.148	278.858		5.36118	0.620208	0.115685	0.186526	1.61236	8.64417
2838.79	12062	0			0.005859	0.094449	16.1203	170.678	10.5878	0.062033		1.21342	4.83738	3.98657	0.824119	0.206724	0.250842
2918.79	12062	0			0.027187	1.68388	61.9377	36.7827	0.593865	0.016145		4.9243	54.7874	11.1259	0.203075	0.0182524	0.0898801
678.794	11982	0			0.038901	2.05947	52.941	25.7062	0.485563	0.018889		6.85975	68.5776	9.99709	0.145778	0.014582	0.100029
758.794	11982	0			0.025411	1.01295	39.8618	39.3523	0.987218	0.025087		4.65105	40.6276	8.73514	0.215005	0.0246138	0.11448
838.794	11982	0			0.004728	0.068182	14.42	211.491	14.6666	0.069348		1.00063	3.59045	3.5882	0.999372	0.278516	0.278692
918.794	11982	0			0.003275	0.046135	14.0876	305.357	21.6756	0.070984		0.734831	2.57911	3.5098	1.36086	0.387731	0.284917
998.794	11982	0			0.007421	0.13522	18.2218	134.757	7.39535	0.054879		1.47418	6.61133	4.48474	0.678341	0.151256	0.222978
1078.79	11982	0			0.003003	0.04311	14.356	333.011	23.1966	0.069657		0.685278	2.44922	3.57405	1.45926	0.408294	0.279795
1158.79	11982	0			0.006616	0.124769	18.8593	151.154	8.01482	0.053024		1.32291	6.13718	4.63914	0.755908	0.162941	0.215557
1238.79	11982	0			0.005777	0.139641	24.1703	173.088	7.1612	0.041373		1.19871	6.97782	5.8211	0.834229	0.143311	0.171789
1318.79	11982	0			0.008693	0.314	36.1198	115.031	3.18471	0.027686		1.72501	14.3347	8.30989	0.579706	0.0697609	0.120339
1398.79	11982	0			0.005534	0.385772	69.7148	180.715	2.5922	0.014344		1.21816	16.5756	13.6071	0.82091	0.0603297	0.0734912
1478.79	11982	0			0.011374	0.276948	24.3498	87.922	3.61079	0.041068		2.21506	12.8274	5.79099	0.451456	0.0779583	0.172682
1558.79	11982	0			0.00222	0.012009	5.4091	450.416	83.27	0.184874		0.584386	0.812505	1.39036	1.7112	1.23076	0.71924
1638.79	11982	0			0.000234	0.001719	7.36039	4281.01	581.629	0.135862		0.174532	0.325671	1.86597	5.72961	3.07058	0.535915
1718.79	11982	0			0.003179	0.033679	10.5938	314.551	29.6919	0.094394		0.692893	1.84501	2.66276	1.44323	0.542003	0.37555
1798.79	11982	0			0.002037	0.013389	6.57357	490.98	74.6901	0.152124		0.520778	0.87243	1.67524	1.9202	1.14622	0.596928
1878.79	11982	0			0.015005	0.336314	22.4139	66.6455	2.97341	0.044615		2.83238	15.3388	5.41553	0.35306	0.065194	0.184654
1958.79	11982	0			0.017301	0.832753	48.1336	57.8006	1.20084	0.020776		3.24331	33.9526	10.4685	0.308327	0.0294528	0.0955246
2038.79	11982	0			0.010026	0.366361	36.54	99.7376	2.72955	0.027367		1.96184	16.4363	8.37801	0.509726	0.060841	0.11936
2118.79	11982	0			0.024077	1.81142	75.2342	41.5333	0.552053	0.013292		4.42668	66.6944	15.0665	0.225903	0.0149938	0.0663725
2198.79	11982	0			0.010181	0.680845	66.8749	98.2234	1.46876	0.014953		2.00739	27.047	13.4737	0.49816	0.0369727	0.0742184
2278.79	11982	0			0.009958	0.419333	42.1118	100.426	2.38474	0.023746		1.97411	18.2967	9.26833	0.506557	0.0546546	0.107894
2358.79	11982	0			0.002927	0.027334	9.337	341.59	36.5846	0.107101		0.673326	1.58803	2.35848	1.48516	0.629711	0.424001
2438.79	11982	0			0.00486	0.086833	17.8663	205.755	11.5163	0.055971		1.01683	4.47737	4.40325	0.983445	0.223345	0.227105
2518.79	11982	0			0.009067	0.156845	17.2979	110.287	6.37572	0.057811		1.76822	7.54642	4.2678	0.565539	0.132513	0.234313
2598.79	11982	0			0.002642	0.027887	10.5547	378.478	35.8589	0.094745		0.589216	1.56269	2.65215	1.69717	0.639923	0.377053
2678.79	11982	0			0.007349	0.119534	16.266	136.078	8.36579	0.061478		1.44268	5.81893	4.0334	0.693153	0.171853	0.24793
2758.79	11982	0			0.004907	0.081251	16.5593	203.804	12.3075	0.060389		1.00523	4.12502	4.10355	0.994797	0.242423	0.243691
2838.79	11982	0			0.006291	0.13767	21.8836	158.957	7.26376	0.045696		1.29024	6.8496	5.30879	0.775051	0.145994	0.188367
2918.79	11982	0			0.010779	0.221899	20.5865	92.7743	4.50656	0.048575		2.12324	10.531	4.95987	0.470979	0.094958	0.201618
678.794	11902	0			0.015771	0.383858	24.3392	63.4066	2.60513	0.041086		2.96126	17.3703	5.86583	0.337694	0.0575697	0.170479
758.794	11902	0			0.008806	0.214418	24.3483	113.555	4.66378	0.041071		1.74808	10.1934	5.83116	0.572055	0.0981031	0.171492
838.794	11902	0			0.011388	0.228571	20.0708	87.81	4.37501	0.049824		2.20362	10.7538	4.88007	0.453799	0.0929902	0.204915
918.794	11902	0			0.002317	0.02703	11.668	431.668	36.9958	0.085704		0.539724	1.57894	2.92547	1.8528	0.633335	0.341826
998.794	11902	0			0.00424	0.071431	16.8488	235.873	13.9994	0.059352		0.892276	3.72077	4.16998	1.12073	0.268761	0.239809
1078.79	11902	0			0.009252	0.202004	21.833	108.082	4.95039	0.045802		1.80216	9.57545	5.31331	0.554889	0.104434	0.188207
1158.79	11902	0			0.026307	2.11358	80.3435	38.0129	0.47313	0.012447		4.81387	74.8828	15.5556	0.207733	0.0133542	0.0642854
1238.79	11902	0			0.012215	1.23137	100.811	81.8695	0.812107	0.00992		2.38692	40.4567	16.9493	0.418949	0.0247178	0.0589994
1318.79	11902	0			0.011736	0.641643	54.6721	85.2065	1.5585	0.018291		2.29226	25.8872	11.2933	0.43625	0.0386291	0.0885481
1398.79	11902	0			0.012171	0.578033	47.4944	82.1655	1.73	0.021055		2.3586	24.1063	10.2206	0.42398	0.0414829	0.0978416
1478.79	11902	0			0.007168	0.089903	12.5417	139.503	11.1231	0.079734		1.45937	4.58184	3.13961	0.685228	0.218253	0.318511
1558.79	11902	0			0.002426	0.015668	6.45765	412.149	63.8234	0.154855		0.580648	0.954687	1.64418	1.72221	1.04746	0.608208
1638.79	11902	0			0.001942	0.011335	5.8361	514.876	88.2226	0.171347		0.500831	0.746223	1.48997	1.99668	1.34008	0.671155
1718.79	11902	0			0.002323	0.012706	5.47055	430.553	78.7039	0.182797		0.573554	0.802596	1.39934	1.74351	1.24596	0.714624
1798.79	11902	0			0.001762	0.012876	7.30981	567.697	77.6623	0.136803		0.448969	0.832262	1.85372	2.22732	1.20154	0.539457
1878.79	11902	0			0.004093	0.041042	10.0272	244.319	24.3655	0.099728		0.885297	2.23853	2.52856	1.12956	0.446722	0.395481
1958.79	11902	0			0.00397	0.031697	7.98394	251.88	31.5483	0.125251		0.86513	1.75294	2.02622	1.1559	0.570469	0.49353
2038.79	11902	0			0.012686	0.438703	34.5816	78.8268	2.27944	0.028917		2.42679	19.4049	7.99611	0.412066	0.0515334	0.125061
2118.79	11902	0			0.010023	0.450576	44.9533	99.7686	2.21938	0.022245		1.99386	19.3448	9.70214	0.501539	0.0516936	0.10307
2198.79	11902	0			0.009926	0.377964	38.0791	100.748	2.64575	0.026261		1.9628	16.8006	8.55953	0.509477	0.0595216	0.116829
2278.79	11902	0			0.004989	0.060178	12.0626	200.449	16.6175	0.082901		1.04992	3.17446	3.02352	0.952454	0.315015	0.33074
2358.79	11902	0			0.000279	0.001534	5.50375	3588.26	651.966	0.181694		0.206936	0.291124	1.40683	4.8324	3.43496	0.710819
2438.79	11902	0			0.92907	0.002507	0.002698	1.07635	398.885	370.592		5.36118	0.470838	0.0878235	0.186526	2.12387	11.3865
2518.79	11902	0			0.003762	0.037075	9.85388	265.785	26.9726	0.101483		0.820989	2.0403	2.48517	1.21804	0.490124	0.402386
2598.79	11902	0			0.92907	0.002139	0.002302	1.07635	467.567	434.403		5.36118	0.403277	0.0752217	0.186526	2.47968	13.294
2678.79	11902	0			0.002178	0.019748	9.06534	459.05	50.6379	0.11031		0.524291	1.19996	2.28873	1.90734	0.833361	0.436923
2758.79	11902	0			0.002578	0.032576	12.6377	387.943	30.6972	0.079128		0.61095	1.93168	3.16176	1.63679	0.517684	0.316279
2838.79	11902	0			0.010273	0.248037	24.1454	97.3459	4.03165	0.041416		2.00145	11.5993	5.79543	0.499638	0.0862124	0.17255
2918.79	11902	0			0.013927	0.92552	66.457	71.8051	1.08047	0.015047		2.66718	35.1363	13.1736	0.374927	0.0284606	0.0759096
678.794	11822	0			0.013413	0.466356	34.7699	74.5566	2.14429	0.028761		2.59545	20.0633	7.73016	0.385289	0.0498424	0.129363
758.794	11822	0			0.0135	0.645869	47.8419	74.0737	1.5483	0.020902		2.63036	25.5302	9.70597	0.380177	0.0391693	0.103029
838.794	11822	0			0.016071	0.915355	56.9553	62.222	1.09247	0.017558		3.07278	33.1903	10.8014	0.325438	0.0301293	0.0925808
918.794	11822	0			0.002683	0.030202	11.2581	372.765	33.1107	0.088825		0.623388	1.76247	2.82725	1.60414	0.567384	0.353701
998.794	11822	0			0.007015	0.113534	16.1846	142.553	8.80791	0.061787		1.37758	5.53236	4.01598	0.725908	0.180755	0.249005
1078.79	11822	0			0.008464	0.213479	25.2208	118.142	4.68431	0.03965		1.65285	10.0788	6.09786	0.605016	0.0992178	0.163992
1158.79	11822	0			0.006386	0.106088	16.6132	156.599	9.42614	0.060193		1.32272	5.41682	4.09521	0.756017	0.18461	0.244188
1238.79	11822	0			0.015962	0.717807	44.9704	62.6498	1.39313	0.022237		2.99794	30.3372	10.1194	0.333563	0.0329628	0.0988204
1318.79	11822	0			0.013486	0.494183	36.6437	74.15	2.02354	0.02729		2.568	21.5894	8.40711	0.389409	0.046319	0.118947
1398.79	11822	0			0.00169	0.013503	7.99041	591.742	74.0565	0.12515		0.445562	0.902125	2.02469	2.24436	1.10849	0.493902
1478.79	11822	0			0.001949	0.014048	7.20783	513.077	71.1833	0.138738		0.4903	0.897274	1.83005	2.03957	1.11449	0.546433
1558.79	11822	0			0.000218	0.002136	9.77714	4577.49	468.183	0.102279		0.16357	0.402759	2.4623	6.11359	2.48287	0.406124
1638.79	11822	0			0.004851	0.050747	10.4603	206.125	19.7054	0.095599		1.02193	2.69243	2.63465	0.978538	0.371412	0.379558
1718.79	11822	0			0.003668	0.024707	6.73657	272.654	40.4737	0.148443		0.803456	1.37737	1.71431	1.24462	0.72602	0.583325
1798.79	11822	0			0.00333	0.022506	6.75821	300.291	44.4335	0.147968		0.737892	1.26798	1.71838	1.35521	0.788655	0.581942
1878.79	11822	0			0.000249	0.001541	6.19009	4017.26	648.982	0.161549		0.185597	0.29244	1.57567	5.38801	3.41951	0.634651
1958.79	11822	0			0.92907	0.001993	0.002145	1.07635	501.76	466.171		5.36118	0.37639	0.0702064	0.186526	2.65682	14.2437
2038.79	11822	0			0.00252	0.018009	7.14506	396.755	55.5286	0.139957		0.592273	1.07466	1.81446	1.68841	0.930528	0.551127
2118.79	11822	0			0.002339	0.02079	8.88951	427.585	48.0999	0.112492		0.555907	1.24853	2.24593	1.79886	0.800942	0.445249
2198.79	11822	0			0.92907	0.002633	0.002834	1.07635	379.85	352.908		5.36118	0.493763	0.0920996	0.186526	2.02526	10.8578
2278.79	11822	0			0.000238	0.002206	9.26439	4199.38	453.282	0.10794		0.177813	0.415683	2.33775	5.62389	2.40568	0.427761
2358.79	11822	0			0.004105	0.041706	10.1591	243.587	23.9773	0.098434		0.866726	2.21656	2.5574	1.15377	0.451149	0.391023
2438.79	11822	0			0.00327	0.027352	8.36416	305.792	36.5598	0.119558		0.722569	1.52915	2.11627	1.38395	0.653959	0.472531
2518.79	11822	0			0.000238	0.001633	6.85225	4195.68	612.307	0.145937		0.177965	0.309645	1.73992	5.61909	3.22951	0.574739
2598.79	11822	0			0.001693	0.011078	6.54313	590.656	90.2711	0.152832		0.442578	0.736385	1.66385	2.25949	1.35798	0.601014
2678.79	11822	0			5.97411	0.012415	0.002078	0.167389	80.5475	481.199		12.3201	0.838503	0.0680597	0.0811682	1.1926	14.693
2758.79	11822	0			0.007605	0.130888	17.2116	131.499	7.64013	0.0581		1.49059	6.34552	4.25705	0.670875	0.157591	0.234904
2838.79	11822	0			0.011517	0.464346	40.3184	86.8284	2.15356	0.024803		2.21638	20.3601	9.18617	0.451186	0.0491157	0.108859
2918.79	11822	0			0.007864	0.15547	19.7695	127.159	6.43211	0.050583		1.55751	7.53743	4.8394	0.642049	0.132671	0.206637
678.794	11742	0			0.028679	1.27399	44.4225	34.8688	0.784936	0.022511		5.10388	40.7391	7.98198	0.195929	0.0245464	0.125282
758.794	11742	0			0.035607	2.7347	76.802	28.0842	0.365671	0.013021		6.26041	73.8705	11.7996	0.159734	0.0135372	0.0847484
838.794	11742	0			0.036555	1.60618	43.9386	27.356	0.622595	0.022759		6.3969	53.2493	8.32423	0.156326	0.0187796	0.120131
918.794	11742	0			0.012664	0.43814	34.5965	78.9621	2.28237	0.028905		2.45807	19.0746	7.75999	0.406823	0.0524257	0.128866
998.794	11742	0			0.92907	0.003424	0.003685	1.07635	292.06	271.345		5.36118	0.636754	0.118771	0.186526	1.57047	8.41956
1078.79	11742	0			0.00205	0.020076	9.79133	487.714	49.8108	0.102131		0.492081	1.21342	2.4659	2.03219	0.824116	0.405532
1158.79	11742	0			0.002297	0.021504	9.36247	435.387	46.5034	0.106809		0.539557	1.27384	2.3609	1.85337	0.785028	0.423568
1238.79	11742	0			0.000198	0.002	10.0874	5042.64	499.893	0.099133		0.148898	0.377765	2.53708	6.71602	2.64715	0.394154
1318.79	11742	0			0.000237	0.001757	7.42331	4225.75	569.254	0.134711		0.17674	0.332616	1.88195	5.65804	3.00647	0.531364
1398.79	11742	0			0.002103	0.016036	7.6261	475.573	62.3612	0.131129		0.499718	0.964541	1.93017	2.00113	1.03676	0.518089
1478.79	11742	0			0.001933	0.022899	11.8489	517.438	43.6697	0.084396		0.45697	1.35658	2.96865	2.18833	0.737147	0.336854
1558.79	11742	0			0.002939	0.044699	15.2073	340.212	22.3716	0.065758		0.640403	2.42277	3.78319	1.56152	0.412751	0.264327
1638.79	11742	0			0.00566	0.113107	19.9844	176.686	8.84122	0.050039		1.13504	5.5802	4.91632	0.88103	0.179205	0.203404
1718.79	11742	0			0.005003	0.072202	14.4311	199.871	13.85	0.069295		1.02843	3.69582	3.59365	0.972355	0.270576	0.278269
1798.79	11742	0			0.002659	0.016821	6.32635	376.109	59.4511	0.158069		0.627593	1.01208	1.61264	1.59339	0.988061	0.6201
1878.79	11742	0			0.000265	0.001612	6.08561	3774.91	620.301	0.164322		0.197078	0.305724	1.55129	5.07415	3.27093	0.644626
1958.79	11742	0			0.000266	0.001573	5.91061	3756.7	635.585	0.169187		0.197998	0.298498	1.50758	5.05055	3.35011	0.663314
2038.79	11742	0			0.92907	0.001938	0.002086	1.07635	516.031	479.429		5.36118	0.3662	0.0683057	0.186526	2.73075	14.6401
2118.79	11742	0			0.002684	0.022892	8.52743	372.509	43.6837	0.117269		0.611439	1.31781	2.15527	1.63549	0.758832	0.463979
2198.79	11742	0			0.003839	0.054288	14.1403	260.467	18.4202	0.07072		0.821269	2.89397	3.52378	1.21763	0.345546	0.283786
2278.79	11742	0			0.005776	0.11956	20.7008	173.142	8.364	0.048307		1.17025	5.93323	5.07003	0.854515	0.168542	0.197237
2358.79	11742	0			0.006534	0.101533	15.5381	153.036	9.84906	0.064358		1.31669	5.07505	3.85439	0.759479	0.197042	0.259444
2438.79	11742	0			0.000258	0.001677	6.50665	3880.27	596.355	0.153689		0.191917	0.317776	1.6558	5.21059	3.14687	0.603937
2518.79	11742	0			0.92907	0.002306	0.002482	1.07635	433.59	402.836		5.36118	0.434091	0.0809693	0.186526	2.30366	12.3504
2598.79	11742	0			0.001951	0.020779	10.6488	512.467	48.1245	0.093907		0.47904	1.28238	2.67697	2.08751	0.779803	0.373557
2678.79	11742	0			0.006562	0.102039	15.5496	152.388	9.80014	0.06431		1.3094	5.05488	3.86044	0.763707	0.197829	0.259038
2758.79	11742	0			0.004603	0.069082	15.0077	217.243	14.4755	0.066632		0.992661	3.69777	3.72511	1.00739	0.270433	0.268448
2838.79	11742	0			0.006802	0.230942	33.9515	147.013	4.3301	0.029454		1.39212	10.9591	7.87224	0.718327	0.0912481	0.127029
2918.79	11742	0			0.006356	0.08261	12.9975	157.335	12.105	0.076938		1.27489	4.1414	3.24845	0.784384	0.241464	0.307839
678.794	11662	0			0.036159	35.2677	975.357	27.6558	0.028355	0.001025		6.31361	134.035	21.2295	0.158388	0.00746075	0.0471043
758.794	11662	0			0.019972	1.44502	72.3537	50.0712	0.692033	0.013821		3.72863	46.1127	12.3672	0.268195	0.021686	0.080859
838.794	11662	0			0.013378	17.5848	1314.49	74.7512	0.056867	0.000761		2.64656	72.9767	27.5741	0.377848	0.013703	0.0362659
918.794	11662	0			0.015169	1.44137	95.0194	65.9228	0.693782	0.010524		2.90169	46.089	15.8835	0.344627	0.0216971	0.0629584
998.794	11662	0			0.003332	0.035115	10.5387	300.116	28.4775	0.094888		0.732056	1.9406	2.65089	1.36602	0.515305	0.377232
1078.79	11662	0			0.003365	0.035124	10.4387	297.196	28.4707	0.095798		0.743615	1.95365	2.62724	1.34478	0.511862	0.380628
1158.79	11662	0			0.002854	0.036678	12.8504	350.36	27.2644	0.077818		0.637052	2.04681	3.21293	1.56973	0.488566	0.311242
1238.79	11662	0			0.002545	0.034394	13.5153	392.954	29.0747	0.07399		0.577337	1.94795	3.37402	1.73209	0.513361	0.296382
1318.79	11662	0			0.002431	0.0221	9.09282	411.433	45.248	0.109977		0.577932	1.32758	2.29712	1.73031	0.753251	0.435328
1398.79	11662	0			0.002943	0.021474	7.29752	339.824	46.567	0.137033		0.669326	1.24015	1.85283	1.49404	0.806356	0.539715
1478.79	11662	0			0.001892	0.014445	7.6361	528.636	69.2285	0.130957		0.465893	0.900803	1.9335	2.14641	1.11012	0.517197
1558.79	11662	0			0.000193	0.002244	11.6108	5173.22	445.552	0.086127		0.14524	0.422719	2.91048	6.88514	2.36564	0.343585
1638.79	11662	0			0.00158	0.020198	12.7796	632.724	49.5104	0.07825		0.390276	1.24718	3.19563	2.56229	0.801812	0.312928
1718.79	11662	0			0.002201	0.022659	10.2937	454.279	44.1317	0.097147		0.534289	1.3846	2.59148	1.87165	0.722231	0.38588
1798.79	11662	0			0.000257	0.002392	9.29981	3888.21	418.096	0.107529		0.191539	0.449763	2.34816	5.22088	2.22339	0.425866
1878.79	11662	0			0.000265	0.00157	5.92291	3773.23	637.057	0.168836		0.197162	0.29782	1.51053	5.07197	3.35773	0.662018
1958.79	11662	0			0.001666	0.011983	7.19103	600.114	83.4531	0.139062		0.446251	0.815403	1.82723	2.24089	1.22639	0.547276
2038.79	11662	0			0.003643	0.053012	14.5508	274.478	18.8635	0.068725		0.782461	2.83468	3.62278	1.27802	0.352773	0.276031
2118.79	11662	0			0.002358	0.04693	19.8991	424.017	21.3084	0.050253		0.569826	2.77946	4.87773	1.75492	0.359782	0.205013
2198.79	11662	0			0.003578	0.192882	53.9107	279.501	5.18452	0.018549		0.83082	9.67631	11.6467	1.20363	0.103345	0.0858613
2278.79	11662	0			0.004353	0.192056	44.122	229.735	5.20681	0.022664		0.990849	9.61001	9.69876	1.00924	0.104058	0.103106
2358.79	11662	0			0.003373	0.037663	11.1654	296.456	26.5514	0.089563		0.761362	2.13661	2.8063	1.31343	0.468031	0.356341
2438.79	11662	0			0.001943	0.017148	8.82324	514.537	58.3161	0.113337		0.479157	1.06775	2.22839	2.087	0.936548	0.448754
2518.79	11662	0			0.006201	0.126272	20.3621	161.256	7.91942	0.049111		1.24617	6.22016	4.99144	0.802462	0.160768	0.200343
2598.79	11662	0			0.004438	0.167765	37.8016	225.324	5.9607	0.026454		0.953268	8.35111	8.7605	1.04902	0.119745	0.114149
2678.79	11662	0			0.007034	0.349877	49.7393	142.162	2.85815	0.020105		1.44279	15.6433	10.8424	0.693102	0.0639251	0.0922305
2758.79	11662	0			0.004578	0.392546	85.7483	218.441	2.54747	0.011662		1.04674	16.6307	15.8881	0.955344	0.0601297	0.0629403
2838.79	11662	0			0.007301	0.265804	36.4051	136.963	3.76218	0.027469		1.50943	12.4116	8.22271	0.662501	0.0805696	0.121614
2918.79	11662	0			0.013052	0.464903	35.6195	76.6169	2.15098	0.028075		2.49704	20.376	8.16007	0.400474	0.0490773	0.122548
598.794	11582	0			0.016392	0.655755	40.0034	61.0037	1.52496	0.024998		3.08376	27.7105	8.98596	0.32428	0.0360874	0.111285
678.794	11582	0			0.024846	1.30297	52.4422	40.2482	0.767477	0.019069		4.55483	49.7976	10.9329	0.219547	0.0200813	0.0914669
758.794	11582	0			0.018525	0.76823	41.4701	53.9814	1.30169	0.024114		3.46869	31.0247	8.9442	0.288293	0.0322324	0.111804
838.794	11582	0			0.012587	0.962892	76.4995	79.4476	1.03854	0.013072		2.44759	34.8391	14.234	0.408566	0.0287034	0.0702541
918.794	11582	0			0.015546	0.588087	37.8285	64.3247	1.70043	0.026435		2.93402	25.2045	8.59042	0.340829	0.0396754	0.116409
998.794	11582	0			0.004909	0.067088	13.6653	203.691	14.9057	0.073178		1.06005	3.61108	3.40651	0.943348	0.276925	0.293556
1078.79	11582	0			0.004156	0.059064	14.2115	240.613	16.9309	0.070366		0.878501	3.11059	3.5408	1.1383	0.321482	0.282422
1158.79	11582	0			0.003713	0.052407	14.1128	269.291	19.0814	0.070858		0.782244	2.75254	3.51877	1.27837	0.363301	0.28419
1238.79	11582	0			0.003683	0.064142	17.4172	271.543	15.5904	0.057414		0.788606	3.396	4.30633	1.26806	0.294464	0.232216
1318.79	11582	0			0.006975	0.22371	32.071	143.359	4.47007	0.031181		1.40148	10.5997	7.56323	0.713533	0.0943423	0.132219
1398.79	11582	0			0.004649	0.115848	24.9204	215.114	8.63202	0.040128		1.00692	6.01623	5.97487	0.993125	0.166217	0.167368
1478.79	11582	0			8.96112	0.027185	0.003034	0.111593	36.7844	329.629		16.4403	1.61783	0.0984067	0.0608263	0.618112	10.1619
1558.79	11582	0			0.002549	0.019674	7.71939	392.375	50.8297	0.129544		0.597089	1.16861	1.95718	1.67479	0.855715	0.510938
1638.79	11582	0			0.92907	1.11506	1.20018	1.07635	0.896816	0.833205		5.36118	16.1073	3.00443	0.186526	0.0620837	0.332842
1718.79	11582	0			0.004288	0.060556	14.1221	233.206	16.5135	0.070811		0.905719	3.1872	3.51897	1.1041	0.313755	0.284174
1798.79	11582	0			0.006298	0.142558	22.6366	158.788	7.01469	0.044176		1.28909	7.06554	5.48104	0.775742	0.141532	0.182447
1878.79	11582	0			0.005594	0.072409	12.943	178.749	13.8105	0.077262		1.16351	3.7642	3.23522	0.859471	0.265661	0.309098
1958.79	11582	0			0.005306	0.091017	17.1549	188.48	10.9869	0.058292		1.09526	4.64043	4.23683	0.913025	0.215497	0.236026
2038.79	11582	0			9.68267	0.05892	0.006085	0.103277	16.9722	164.337		17.4355	3.33973	0.191547	0.0573541	0.299425	5.22064
2118.79	11582	0			0.004079	0.176598	43.2953	245.163	5.66258	0.023097		0.907485	8.86007	9.76333	1.10195	0.112866	0.102424
2198.79	11582	0			0.00471	0.191163	40.5885	212.324	5.23113	0.024637		1.0325	9.45407	9.1565	0.968524	0.105775	0.109212
2278.79	11582	0			0.005802	0.432969	74.6277	172.363	2.30964	0.0134		1.24686	18.2115	14.6059	0.802015	0.0549104	0.0684656
2358.79	11582	0			0.006319	0.902575	142.834	158.252	1.10794	0.007001		1.33342	30.2856	22.7128	0.749952	0.0330189	0.044028
2438.79	11582	0			0.005801	0.199119	34.3237	172.378	5.02211	0.029134		1.20675	9.638	7.98676	0.828674	0.103756	0.125207
2518.79	11582	0			0.004558	0.295511	64.8336	219.395	3.38397	0.015424		1.03186	13.5435	13.1253	0.969123	0.0738364	0.0761889
2598.79	11582	0			0.009758	0.699402	71.6716	102.476	1.42979	0.013953		1.92811	27.6203	14.3251	0.518642	0.0362052	0.0698077
2678.79	11582	0			0.008598	0.570779	66.3815	116.3	1.75199	0.015064		1.74182	23.0407	13.228	0.574114	0.0434014	0.0755972
2758.79	11582	0			0.005602	0.126067	22.5045	178.512	7.93231	0.044436		1.19891	6.48588	5.4098	0.834089	0.154181	0.18485
2838.79	11582	0			0.013558	0.472001	34.8141	73.7584	2.11864	0.028724		2.60258	20.4802	7.86919	0.384235	0.0488278	0.127078
2918.79	11582	0			0.011417	0.307914	26.9708	87.5919	3.24766	0.037077		2.24869	14.076	6.25963	0.444704	0.0710431	0.159754
678.794	11502	0			0.012671	0.215207	16.9836	78.9177	4.6467	0.05888		2.40972	10.103	4.19258	0.414986	0.0989809	0.238516
758.794	11502	0			0.015868	0.573323	36.1312	63.0207	1.74422	0.027677		2.99115	24.6671	8.2467	0.33432	0.0405399	0.121261
838.794	11502	0			0.010817	0.394583	36.4766	92.4433	2.53432	0.027415		2.10718	17.5365	8.32224	0.474567	0.057024	0.12016
918.794	11502	0			0.007326	0.138093	18.8499	136.501	7.24148	0.053051		1.45278	6.73266	4.63433	0.688335	0.14853	0.215781
998.794	11502	0			0.016979	0.511099	30.1026	58.8978	1.95657	0.03322		3.17455	22.6262	7.12737	0.315005	0.0441965	0.140304
1078.79	11502	0			0.010184	0.177684	17.4475	98.1942	5.62798	0.057315		1.9769	8.49214	4.29568	0.505842	0.117756	0.232792
1158.79	11502	0			0.003089	0.030647	9.92249	323.772	32.6301	0.100781		0.691152	1.72811	2.50033	1.44686	0.578668	0.399948
1238.79	11502	0			0.004716	0.094498	20.0378	212.045	10.5822	0.049906		0.971495	4.78394	4.92431	1.02934	0.209033	0.203074
1318.79	11502	0			0.009273	0.337368	36.3805	107.836	2.96412	0.027487		1.81296	15.3098	8.44466	0.551583	0.0653174	0.118418
1398.79	11502	0			0.007225	0.681064	94.2687	138.414	1.46829	0.010608		1.47122	26.4036	17.9468	0.67971	0.0378736	0.0557203
1478.79	11502	0			0.012606	0.771094	61.1694	79.3281	1.29686	0.016348		2.39698	31.9376	13.3241	0.417191	0.0313111	0.075052
1558.79	11502	0			0.007045	0.359596	51.0398	141.936	2.7809	0.019593		1.43279	16.0447	11.1982	0.697939	0.0623258	0.0892998
1638.79	11502	0			0.01084	0.763604	70.4412	92.2483	1.30958	0.014196		2.08825	31.0297	14.8592	0.478869	0.0322271	0.0672984
1718.79	11502	0			0.006094	0.216853	35.5833	164.089	4.61142	0.028103		1.24573	10.3443	8.30383	0.802745	0.0966717	0.120426
1798.79	11502	0			0.00744	0.173171	23.2757	134.409	5.77464	0.042963		1.45611	8.27115	5.68031	0.686762	0.120902	0.176047
1878.79	11502	0			0.002796	0.053957	19.2955	357.608	18.5333	0.051826		0.633874	3.00877	4.74664	1.5776	0.332362	0.210676
1958.79	11502	0			0.002087	0.028914	13.856	479.211	34.585	0.072171		0.524841	1.81298	3.45433	1.90534	0.551579	0.289492
2038.79	11502	0			0.006483	0.147817	22.8	154.245	6.76513	0.04386		1.30257	7.22275	5.545	0.767713	0.138451	0.180343
2118.79	11502	0			0.006717	0.241154	35.9014	148.874	4.14674	0.027854		1.35931	11.3562	8.35439	0.735669	0.0880578	0.119698
2198.79	11502	0			0.005842	0.357333	61.1675	171.178	2.79851	0.016349		1.23358	15.8271	12.8303	0.810652	0.0631826	0.0779405
2278.79	11502	0			0.00812	0.389095	47.9197	123.157	2.57007	0.020868		1.65148	17.0703	10.3364	0.605518	0.0585811	0.0967455
2358.79	11502	0			0.004899	0.747848	152.664	204.138	1.33717	0.00655		1.15042	23.9563	20.8238	0.869244	0.0417427	0.0480219
2438.79	11502	0			0.013536	0.697991	51.5666	73.8786	1.43268	0.019392		2.58847	28.5722	11.0383	0.386329	0.034999	0.0905939
2518.79	11502	0			0.00968	0.532784	55.0372	103.301	1.87693	0.01817		1.916	22.305	11.6415	0.521922	0.044833	0.0858999
2598.79	11502	0			0.004218	0.378021	89.6195	237.076	2.64536	0.011158		0.987808	16.1094	16.3083	1.01234	0.0620754	0.0613186
2678.79	11502	0			0.008315	0.214464	25.7912	120.259	4.6628	0.038773		1.65313	10.1904	6.1643	0.604912	0.0981314	0.162224
2758.79	11502	0			0.002831	0.033132	11.7045	353.263	30.1819	0.085438		0.635278	1.8643	2.93462	1.57411	0.536395	0.34076
2838.79	11502	0			0.007023	0.117664	16.7539	142.387	8.49877	0.059688		1.42294	5.88063	4.13274	0.702772	0.17005	0.24197
2918.79	11502	0			0.007535	0.341103	45.2673	132.708	2.93166	0.022091		1.59307	15.1909	9.53563	0.62772	0.0658289	0.10487
678.794	11422	0			0.017089	0.321623	18.821	58.5188	3.10923	0.053132		3.18746	14.7601	4.63067	0.313729	0.0677504	0.215952
758.794	11422	0			0.007667	0.142058	18.5289	130.433	7.03939	0.05397		1.51196	6.89535	4.56053	0.661393	0.145025	0.219273
838.794	11422	0			0.008245	0.265989	32.259	121.279	3.75956	0.030999		1.65611	12.3906	7.48173	0.603825	0.0807066	0.133659
918.794	11422	0			0.014428	0.72137	49.9994	69.3117	1.38625	0.02		2.73824	29.765	10.8701	0.365198	0.0335965	0.0919953
998.794	11422	0			0.01163	0.606755	52.1735	85.9878	1.64811	0.019167		2.24403	25.4204	11.328	0.445627	0.0393384	0.0882765
1078.79	11422	0			0.016609	0.927512	55.8426	60.2069	1.07815	0.017907		3.1204	37.0758	11.8817	0.320471	0.0269718	0.0841629
1158.79	11422	0			0.006365	0.159674	25.086	157.107	6.26275	0.039863		1.3248	7.92544	5.98234	0.754828	0.126176	0.167159
1238.79	11422	0			0.012641	0.37418	29.6015	79.1103	2.67251	0.033782		2.39597	16.9529	7.07561	0.417368	0.0589869	0.141331
1318.79	11422	0			0.004986	0.118319	23.7287	200.548	8.4517	0.042143		1.03332	5.9526	5.76066	0.967754	0.167994	0.173591
1398.79	11422	0			0.012911	0.530039	41.0531	77.453	1.88665	0.024359		2.45806	23.0393	9.37295	0.406824	0.0434041	0.10669
1478.79	11422	0			0.012626	0.465028	36.831	79.2018	2.15041	0.027151		2.41352	20.4486	8.47254	0.414333	0.0489031	0.118028
1558.79	11422	0			0.016098	0.804655	49.9861	62.1211	1.24277	0.020006		3.01965	33.611	11.1307	0.331164	0.0297522	0.0898412
1638.79	11422	0			0.012588	0.529733	42.0827	79.4413	1.88774	0.023763		2.39588	23.0835	9.63466	0.417383	0.0433209	0.103792
1718.79	11422	0			0.002993	0.039965	13.3515	334.079	25.0218	0.074898		0.663981	2.21381	3.33415	1.50607	0.451709	0.299926
1798.79	11422	0			0.002272	0.029684	13.0667	440.199	33.6886	0.07653		0.525266	1.71521	3.26541	1.9038	0.58302	0.30624
1878.79	11422	0			0.003286	0.052254	15.8996	304.276	19.1373	0.062895		0.722259	2.84897	3.94453	1.38454	0.351004	0.253516
1958.79	11422	0			0.005169	0.079084	15.2983	193.444	12.6448	0.065367		1.08041	4.1015	3.79623	0.925573	0.243814	0.263419
2038.79	11422	0			0.002321	0.025107	10.8158	430.796	39.8301	0.092457		0.556221	1.51245	2.71916	1.79785	0.661177	0.36776
2118.79	11422	0			0.00488	0.074008	15.1645	204.904	13.5121	0.065944		0.99726	3.7608	3.77113	1.00275	0.265901	0.265172
2198.79	11422	0			0.008204	0.173983	21.2065	121.888	5.7477	0.047155		1.60846	8.33238	5.18036	0.621714	0.120014	0.193037
2278.79	11422	0			0.008591	0.267312	31.1138	116.395	3.74094	0.03214		1.69345	12.423	7.3359	0.590509	0.0804958	0.136316
2358.79	11422	0			0.007841	0.506996	64.658	127.532	1.9724	0.015466		1.62376	20.7298	12.7666	0.615856	0.0482398	0.0783297
2438.79	11422	0			0.005239	0.387141	73.8945	190.872	2.58304	0.013533		1.20104	16.4068	13.6604	0.832609	0.0609504	0.0732041
2518.79	11422	0			0.00712	12.9779	1822.81	140.455	0.077054	0.000549		1.53891	57.0691	37.0841	0.649811	0.0175226	0.0269657
2598.79	11422	0			0.007147	0.174449	24.41	139.926	5.73233	0.040967		1.43681	8.44962	5.88081	0.695985	0.118349	0.170045
2678.79	11422	0			0.92907	0.005053	0.005438	1.07635	197.917	183.879		5.36118	0.923571	0.17227	0.186526	1.08275	5.80484
2758.79	11422	0			0.002391	0.028537	11.9331	418.168	35.0426	0.0838		0.557423	1.66688	2.99033	1.79397	0.599924	0.334412
2838.79	11422	0			0.003233	0.047938	14.8279	309.312	20.8602	0.06744		0.704878	2.60094	3.68992	1.41869	0.384476	0.271008
2918.79	11422	0			0.008298	0.139611	16.8256	120.518	7.16275	0.059433		1.612	6.71672	4.1667	0.620347	0.148882	0.239998
678.794	11342	0			0.022528	0.237702	10.5516	44.3898	4.20694	0.094773		4.15617	11.0343	2.65492	0.240606	0.0906266	0.376659
758.794	11342	0			0.004074	0.042489	10.4286	245.444	23.5356	0.09589		0.86531	2.27064	2.62408	1.15566	0.440404	0.381086
838.794	11342	0			0.00461	0.065204	14.1431	216.905	15.3364	0.070706		0.96215	3.39073	3.52411	1.03934	0.294922	0.283759
918.794	11342	0			0.007481	0.142075	18.9915	133.672	7.03855	0.052655		1.47174	6.87914	4.67415	0.679468	0.145367	0.213943
998.794	11342	0			0.008156	0.324909	39.8371	122.61	3.07778	0.025102		1.62398	14.7677	9.09353	0.61577	0.0677152	0.109968
1078.79	11342	0			0.013391	1.2589	94.0081	74.6745	0.794342	0.010637		2.58479	42.3462	16.3829	0.386879	0.0236149	0.0610394
1158.79	11342	0			0.016274	1.30757	80.3474	61.4482	0.764781	0.012446		3.08441	44.8299	14.5343	0.324211	0.0223065	0.0688026
1238.79	11342	0			0.009182	0.36924	40.2151	108.913	2.70826	0.024866		1.84991	16.3687	8.84837	0.540568	0.0610924	0.113015
1318.79	11342	0			0.002642	0.025882	9.7983	378.569	38.6362	0.102058		0.611225	1.50961	2.46981	1.63606	0.662422	0.404889
1398.79	11342	0			0.000253	0.001825	7.22535	3958.37	547.844	0.138402		0.188262	0.345356	1.83444	5.31174	2.89556	0.545125
1478.79	11342	0			0.00025	0.001796	7.17861	3997.06	556.801	0.139303		0.186503	0.339909	1.82254	5.36185	2.94196	0.548684
1558.79	11342	0			0.001569	0.013098	8.34596	637.209	76.3494	0.119818		0.411009	0.867281	2.11013	2.43304	1.15303	0.473905
1638.79	11342	0			0.002018	0.021762	10.7863	495.658	45.9524	0.09271		0.478829	1.29724	2.70919	2.08843	0.770869	0.369114
1718.79	11342	0			0.00246	0.029249	11.8893	406.486	34.1893	0.084109		0.577756	1.72181	2.98017	1.73083	0.580784	0.335551
1798.79	11342	0			0.006427	0.133656	20.7965	155.597	7.48192	0.048085		1.27861	6.52128	5.10027	0.782097	0.153344	0.196068
1878.79	11342	0			0.005447	0.148494	27.2603	183.579	6.73427	0.036683		1.13897	7.40704	6.50327	0.877984	0.135007	0.153769
1958.79	11342	0			0.003506	0.106042	30.2472	285.237	9.4302	0.033061		0.810258	5.76155	7.11077	1.23418	0.173564	0.140632
2038.79	11342	0			0.004077	0.049712	12.1948	245.308	20.1157	0.082002		0.874736	2.67208	3.05472	1.1432	0.374241	0.327362
2118.79	11342	0			0.001705	0.01426	8.36373	586.525	70.1273	0.119564		0.44765	0.947667	2.11698	2.23389	1.05522	0.47237
2198.79	11342	0			0.92907	0.00295	0.003175	1.07635	339.01	314.964		5.36118	0.551362	0.102843	0.186526	1.81369	9.72353
2278.79	11342	0			0.00228	0.024496	10.7442	438.617	40.8235	0.093073		0.540061	1.45849	2.7006	1.85164	0.685641	0.370288
2358.79	11342	0			0.005085	0.131196	25.8015	196.664	7.6222	0.038757		1.09331	6.72365	6.14981	0.914654	0.148729	0.162607
2438.79	11342	0			0.004621	0.213407	46.1774	216.382	4.68589	0.021656		1.04089	10.4587	10.0478	0.960719	0.0956146	0.099524
2518.79	11342	0			0.008189	0.579111	70.7185	122.116	1.72679	0.014141		1.66906	23.197	13.8982	0.59914	0.0431091	0.0719517
2598.79	11342	0			0.004556	0.078665	17.2676	219.507	12.7121	0.057912		0.950333	4.05638	4.26838	1.05226	0.246525	0.234281
2678.79	11342	0			0.007349	0.128083	17.4298	136.082	7.80741	0.057373		1.45625	6.26553	4.3025	0.686694	0.159603	0.232423
2758.79	11342	0			0.005323	0.105512	19.8236	187.88	9.47757	0.050445		1.09555	5.32582	4.86134	0.912787	0.187765	0.205705
2838.79	11342	0			0.004466	0.074761	16.7384	223.891	13.3759	0.059743		0.969588	4.00455	4.13015	1.03137	0.249716	0.242122
2918.79	11342	0			0.004601	0.067133	14.5917	217.357	14.8959	0.068532		0.9566	3.47453	3.63216	1.04537	0.287809	0.275318
678.794	11262	0			0.012122	0.172138	14.2	82.4916	5.80928	0.070423		2.33085	8.23285	3.53212	0.429028	0.121465	0.283116
758.794	11262	0			0.013742	0.287785	20.942	72.7695	3.47482	0.047751		2.61303	13.2765	5.08088	0.382698	0.0753212	0.196816
838.794	11262	0			0.003008	0.029917	9.94742	332.501	33.4258	0.100529		0.679958	1.70463	2.50697	1.47068	0.586636	0.398888
918.794	11262	0			0.007279	0.113862	15.6436	137.391	8.78254	0.063924		1.42106	5.52454	3.88762	0.703701	0.181011	0.257227
998.794	11262	0			0.007014	0.194581	27.7416	142.571	5.13925	0.036047		1.41342	9.34813	6.61386	0.707505	0.106973	0.151198
1078.79	11262	0			0.0154	1.26294	82.0079	64.9343	0.791805	0.012194		2.93255	43.5249	14.842	0.341	0.0229754	0.0673764
1158.79	11262	0			0.01756	1.41224	80.4215	56.9462	0.708097	0.012434		3.29475	50.0496	15.1907	0.303513	0.0199802	0.0658297
1238.79	11262	0			0.010206	0.512354	50.2031	97.9852	1.95178	0.019919		2.01437	21.6096	10.7277	0.496432	0.0462758	0.0932168
1318.79	11262	0			0.002196	0.016317	7.43155	455.435	61.284	0.134561		0.534768	1.00847	1.88581	1.86997	0.991601	0.530276
1398.79	11262	0			0.002324	0.018209	7.83487	430.27	54.9173	0.127635		0.55149	1.0945	1.98463	1.81327	0.913656	0.503872
1478.79	11262	0			0.92907	0.002996	0.003224	1.07635	333.805	310.128		5.36118	0.559683	0.104396	0.186526	1.78672	9.57896
1558.79	11262	0			0.003413	0.035498	10.4018	293.023	28.1703	0.096137		0.744618	1.94876	2.61713	1.34297	0.513148	0.382099
1638.79	11262	0			0.00399	0.048322	12.1118	250.647	20.6944	0.082564		0.85147	2.58355	3.03422	1.17444	0.387064	0.329574
1718.79	11262	0			0.00553	0.189475	34.2631	180.832	5.27774	0.029186		1.15871	9.24081	7.97511	0.863031	0.108216	0.12539
1798.79	11262	0			0.008253	0.789282	95.6334	121.165	1.26697	0.010457		1.69194	28.5186	16.8556	0.591039	0.0350648	0.0593274
1878.79	11262	0			7.19453	0.925589	0.128652	0.138995	1.08039	7.77292		14.0035	25.9181	1.85083	0.0714107	0.0385831	0.540299
1958.79	11262	0			0.000504	0.03594	71.273	1983.13	27.8244	0.014031		0.363168	4.96074	13.6596	2.75355	0.201583	0.0732084
2038.79	11262	0			0.005298	0.289839	54.7119	188.767	3.4502	0.018278		1.14926	13.3489	11.6152	0.870127	0.0749126	0.0860939
2118.79	11262	0			0.007056	0.218717	30.9964	141.719	4.57211	0.032262		1.43737	10.4338	7.25895	0.695717	0.0958426	0.137761
2198.79	11262	0			0.009478	0.202145	21.3279	105.508	4.94696	0.046887		1.83306	9.55213	5.21102	0.545535	0.104689	0.191901
2278.79	11262	0			0.00022	0.002124	9.65178	4543.49	470.741	0.103608		0.164757	0.400621	2.43159	6.06955	2.49612	0.411254
2358.79	11262	0			0.003562	0.039914	11.2058	280.746	25.0536	0.089239		0.763755	2.14828	2.81279	1.30932	0.465488	0.355519
2438.79	11262	0			0.002971	0.038939	13.1067	336.593	25.6811	0.076297		0.676544	2.21548	3.27471	1.4781	0.451368	0.305371
2518.79	11262	0			0.009637	0.183693	19.0621	103.772	5.44387	0.05246		1.86172	8.72323	4.68557	0.537137	0.114636	0.213421
2598.79	11262	0			0.007581	0.137257	18.1047	131.904	7.28562	0.055234		1.49487	6.67091	4.46254	0.668955	0.149905	0.224088
2678.79	11262	0			0.005272	0.075119	14.2498	189.697	13.3123	0.070177		1.07941	3.83166	3.54976	0.926429	0.260983	0.281709
2758.79	11262	0			0.004114	0.052714	12.8143	243.093	18.9704	0.078038		0.872703	2.79635	3.20424	1.14586	0.357609	0.312086
2838.79	11262	0			0.008909	0.194168	21.7938	112.242	5.15019	0.045885		1.73934	9.23121	5.30731	0.574931	0.108328	0.188419
2918.79	11262	0			0.012703	0.351417	27.6631	78.7189	2.84563	0.036149		2.41845	15.9609	6.59964	0.413488	0.0626531	0.151523
678.794	11182	0			0.046277	2.94847	63.7135	21.609	0.339159	0.015695		8.24463	103.913	12.6037	0.121291	0.00962348	0.079342
758.794	11182	0			0.011219	0.423021	37.7052	89.1333	2.36395	0.026522		2.18219	18.6116	8.52884	0.458254	0.05373	0.117249
838.794	11182	0			0.008121	0.178076	21.929	123.144	5.61558	0.045602		1.60056	8.54136	5.33648	0.624782	0.117077	0.187389
918.794	11182	0			0.010616	0.217742	20.5109	94.1981	4.59259	0.048755		2.03285	10.2176	5.02622	0.49192	0.0978708	0.198957
998.794	11182	0			0.008129	0.219868	27.0468	123.014	4.54819	0.036973		1.60743	10.4006	6.47031	0.622112	0.0961486	0.154552
1078.79	11182	0			0.010966	0.718767	65.5469	91.1935	1.39127	0.015256		2.15672	28.0489	13.0054	0.463667	0.035652	0.0768913
1158.79	11182	0			0.01372	0.90918	66.2691	72.8889	1.09989	0.01509		2.61556	35.5539	13.5933	0.382328	0.0281263	0.0735659
1238.79	11182	0			0.002876	0.032472	11.2913	347.723	30.7956	0.088564		0.667519	1.89328	2.83629	1.49809	0.528185	0.352574
1318.79	11182	0			0.001876	0.015865	8.45793	533.121	63.0322	0.118232		0.466006	0.996268	2.13789	2.1459	1.00375	0.467751
1398.79	11182	0			0.007593	0.16271	21.4302	131.708	6.14592	0.046663		1.50914	7.87768	5.21997	0.662629	0.126941	0.191572
1478.79	11182	0			0.009394	0.484755	51.6042	106.454	2.0629	0.019378		1.8406	20.9216	11.3668	0.543303	0.0477974	0.0879757
1558.79	11182	0			0.008629	1.10234	127.752	115.891	0.907158	0.007828		1.73772	36.6678	21.1011	0.575467	0.0272719	0.0473909
1638.79	11182	0			0.008791	0.721274	82.0461	113.752	1.38644	0.012188		1.77372	27.438	15.4692	0.563787	0.0364458	0.0646446
1718.79	11182	0			0.013408	1.32642	98.9293	74.5834	0.753906	0.010108		2.58367	44.225	17.1171	0.387046	0.0226116	0.058421
1798.79	11182	0			0.010057	20.6505	2053.28	99.4299	0.048425	0.000487		2.01862	83.5623	41.3958	0.495388	0.0119671	0.0241571
1878.79	11182	0			0.010363	0.951886	91.8555	96.4985	1.05055	0.010887		2.07965	32.5887	15.6703	0.480851	0.0306855	0.063815
1958.79	11182	0			0.000463	0.064067	138.229	2157.57	15.6087	0.007234		0.33563	7.23071	21.5437	2.97947	0.138299	0.0464173
2038.79	11182	0			0.004771	0.238811	50.0539	209.596	4.18741	0.019978		1.06822	11.4498	10.7186	0.936136	0.0873377	0.093296
2118.79	11182	0			0.006795	0.233114	34.3042	147.156	4.28974	0.029151		1.39318	11.0547	7.93489	0.717782	0.0904589	0.126026
2198.79	11182	0			0.006858	0.158523	23.1148	145.813	6.30823	0.043262		1.39982	7.79776	5.57056	0.714379	0.128242	0.179515
2278.79	11182	0			0.000248	0.001934	7.79889	4031.67	516.955	0.128223		0.184956	0.365559	1.97646	5.40668	2.73554	0.505955
2358.79	11182	0			0.92907	0.002059	0.002216	1.07635	485.615	451.171		5.36118	0.388624	0.0724885	0.186526	2.57318	13.7953
2438.79	11182	0			0.005998	0.085333	14.2273	166.727	11.7188	0.070287		1.19159	4.22595	3.54648	0.839215	0.236633	0.28197
2518.79	11182	0			0.002102	0.023436	11.1487	475.701	42.6689	0.089697		0.493243	1.38003	2.79787	2.0274	0.724622	0.357415
2598.79	11182	0			7.52012	0.017482	0.002325	0.132977	57.2007	430.156		14.4526	1.09763	0.0759469	0.0691917	0.911053	13.1671
2678.79	11182	0			0.92907	0.002323	0.002501	1.07635	430.419	399.89		5.36118	0.437209	0.0815508	0.186526	2.28724	12.2623
2758.79	11182	0			0.002405	0.02549	10.5994	415.821	39.2306	0.094345		0.552796	1.47261	2.66393	1.80899	0.679068	0.375386
2838.79	11182	0			0.004023	0.056738	14.1048	248.593	17.6248	0.070898		0.866931	3.04638	3.51398	1.15349	0.328259	0.284578
2918.79	11182	0			0.009629	0.221482	23.0007	103.849	4.51504	0.043477		1.86778	10.423	5.5804	0.535394	0.0959419	0.179199
678.794	11102	0			0.003735	0.061929	16.5828	267.772	16.1476	0.060304		0.785704	3.23122	4.11251	1.27274	0.309481	0.24316
758.794	11102	0			0.003246	0.046329	14.2736	308.091	21.5847	0.070059		0.711927	2.53172	3.55616	1.40464	0.394988	0.281202
838.794	11102	0			0.003	0.041516	13.8385	333.334	24.0874	0.072262		0.669107	2.30937	3.45142	1.49453	0.433019	0.289736
918.794	11102	0			0.002223	0.025648	11.5352	449.751	38.9893	0.086691		0.518703	1.50047	2.89273	1.92789	0.666459	0.345694
998.794	11102	0			0.01105	0.216959	19.6342	90.4974	4.60917	0.050932		2.10124	10.1556	4.83316	0.475909	0.0984676	0.206904
1078.79	11102	0			0.003346	0.048769	14.5774	298.909	20.505	0.0686		0.719406	2.6118	3.63049	1.39004	0.382878	0.275445
1158.79	11102	0			0.0034	0.040998	12.0595	294.145	24.3911	0.082922		0.736818	2.22593	3.021	1.35719	0.44925	0.331016
1238.79	11102	0			0.000231	0.001871	8.10889	4333.51	534.414	0.123321		0.172485	0.353859	2.05153	5.7976	2.82599	0.487441
1318.79	11102	0			0.001811	0.027347	15.1038	552.303	36.5672	0.066209		0.459513	1.72527	3.75457	2.17622	0.579619	0.266342
1398.79	11102	0			0.005564	0.385477	69.2747	179.712	2.59419	0.014435		1.18397	16.7712	14.1652	0.844615	0.059626	0.0705955
1478.79	11102	0			0.006793	0.304291	44.7943	147.209	3.28633	0.022324		1.37359	13.9358	10.1456	0.728021	0.0717574	0.098565
1558.79	11102	0			0.005266	0.23067	43.8068	189.911	4.33521	0.022828		1.15155	11.089	9.62969	0.868398	0.0901792	0.103846
1638.79	11102	0			0.008763	0.619537	70.703	114.122	1.61411	0.014144		1.77317	24.4782	13.8048	0.563961	0.0408526	0.0724387
1718.79	11102	0			0.013732	1.53819	112.016	72.8233	0.650115	0.008927		2.63991	48.8116	18.4899	0.378801	0.0204869	0.0540836
1798.79	11102	0			0.010515	1.05099	99.9471	95.0982	0.951485	0.010005		2.11815	34.102	16.0999	0.47211	0.0293238	0.0621122
1878.79	11102	0			0.00068	0.115189	169.34	1470.11	8.68142	0.005905		0.47867	9.76448	20.3992	2.08912	0.102412	0.0490216
1958.79	11102	0			0.00581	9.7344	1675.4	172.111	0.102728	0.000597		1.33628	45.8695	34.3263	0.748346	0.021801	0.0291322
2038.79	11102	0			0.012005	1.37064	114.176	83.3012	0.729585	0.008758		2.34312	43.7559	18.6742	0.426782	0.0228541	0.0535497
2118.79	11102	0			0.007449	0.130776	17.5571	134.254	7.64669	0.056957		1.52005	6.54615	4.30653	0.657872	0.152762	0.232206
2198.79	11102	0			0.92907	0.002403	0.002587	1.07635	416.112	386.598		5.36118	0.451851	0.0842819	0.186526	2.21312	11.8649
2278.79	11102	0			0.003778	0.031309	8.2873	264.696	31.9399	0.120666		0.810039	1.6983	2.09657	1.23451	0.588823	0.47697
2358.79	11102	0			0.001997	0.018079	9.05367	500.779	55.3123	0.110452		0.488124	1.11544	2.28516	2.04866	0.896505	0.437606
2438.79	11102	0			0.000235	0.002636	11.1988	4247.93	379.321	0.089296		0.175847	0.494432	2.81172	5.68676	2.02252	0.355654
2518.79	11102	0			0.003789	0.070288	18.5492	263.904	14.2272	0.053911		0.807213	3.69208	4.57386	1.23883	0.27085	0.218634
2598.79	11102	0			0.004517	0.087269	19.322	221.407	11.4588	0.051755		0.934721	4.44674	4.75729	1.06984	0.224884	0.210204
2678.79	11102	0			0.003499	0.05562	15.8963	285.803	17.9792	0.062908		0.749439	2.95771	3.94657	1.33433	0.338099	0.253385
2758.79	11102	0			0.005003	0.07285	14.5602	199.864	13.7268	0.068681		1.01732	3.68902	3.62623	0.982978	0.271075	0.275769
2838.79	11102	0			0.008748	0.138042	15.7791	114.306	7.24416	0.063375		1.68949	6.62023	3.91847	0.591893	0.151052	0.255202
2918.79	11102	0			0.014716	0.285375	19.3916	67.9513	3.50416	0.051569		2.76623	13.1719	4.76168	0.361503	0.0759193	0.21001
758.794	11022	0			0.005405	0.080606	14.9124	185.002	12.406	0.067058		1.09228	4.05283	3.71042	0.915514	0.246741	0.269511
838.794	11022	0			0.003245	0.036257	11.1722	308.142	27.5813	0.089508		0.711136	1.99473	2.805	1.4062	0.50132	0.356507
918.794	11022	0			0.002833	0.025618	9.0437	353.025	39.0355	0.110574		0.648525	1.48177	2.28483	1.54196	0.67487	0.43767
998.794	11022	0			0.002815	0.027119	9.63527	355.29	36.8739	0.103785		0.658216	1.60115	2.43256	1.51926	0.624551	0.411089
1078.79	11022	0			0.002924	0.02744	9.38392	341.981	36.4433	0.106565		0.674929	1.59986	2.37041	1.48164	0.625054	0.421867
1158.79	11022	0			0.92907	0.002492	0.002682	1.07635	401.256	372.795		5.36118	0.468131	0.0873186	0.186526	2.13615	11.4523
1238.79	11022	0			0.000228	0.002038	8.94051	4387.83	490.781	0.11185		0.170417	0.384624	2.25696	5.86796	2.59994	0.443075
1318.79	11022	0			0.005085	0.088938	17.4918	196.676	11.2438	0.057169		1.03551	4.47932	4.32574	0.965712	0.223248	0.231174
1398.79	11022	0			0.008363	0.213638	25.5465	119.579	4.68082	0.039144		1.63656	10.0928	6.16711	0.611038	0.0990801	0.16215
1478.79	11022	0			0.005397	0.108021	20.0132	185.272	9.25747	0.049967		1.09752	5.39428	4.91498	0.911148	0.185382	0.203459
1558.79	11022	0			0.011353	0.47943	42.2292	88.0822	2.08581	0.02368		2.18608	20.9349	9.57649	0.457441	0.047767	0.104422
1638.79	11022	0			0.009112	0.660424	72.4771	109.743	1.51418	0.013797		1.82118	26.0806	14.3207	0.549095	0.0383426	0.0698288
1718.79	11022	0			0.010378	1.20872	116.468	96.3569	0.827324	0.008586		2.0743	38.1915	18.4118	0.482091	0.0261839	0.0543131
1798.79	11022	0			0.008727	0.8591	98.4419	114.587	1.16401	0.010158		1.82644	28.5814	15.6487	0.547513	0.0349877	0.063903
1878.79	11022	0			0.00932	1.13615	121.909	107.3	0.880163	0.008203		1.90762	34.9523	18.3225	0.524212	0.0286104	0.0545778
1958.79	11022	0			0.011557	1.15514	99.9533	86.5294	0.865698	0.010005		2.27619	38.1976	16.7813	0.43933	0.0261797	0.05959
2038.79	11022	0			0.003604	0.049949	13.8587	277.454	20.0202	0.072157		0.860179	2.96766	3.45005	1.16255	0.336966	0.289851
2118.79	11022	0			0.00312	0.023477	7.52437	320.496	42.5943	0.132902		0.70933	1.35563	1.91114	1.40978	0.737666	0.523248
2198.79	11022	0			0.000273	0.001693	6.18989	3657.16	590.828	0.161554		0.203184	0.320694	1.57834	4.92164	3.11824	0.633577
2278.79	11022	0			0.003634	0.052378	14.4131	275.175	19.092	0.069381		0.769007	2.76164	3.59118	1.30038	0.362103	0.27846
2358.79	11022	0			0.007525	0.188805	25.0907	132.892	5.29647	0.039855		1.4795	8.99686	6.08102	0.675904	0.11115	0.164446
2438.79	11022	0			0.004609	0.10071	21.8516	216.975	9.92947	0.045763		0.961597	5.13173	5.33667	1.03994	0.194866	0.187383
2518.79	11022	0			0.002952	0.027642	9.36526	338.803	36.1765	0.106778		0.690579	1.63516	2.36781	1.44806	0.611561	0.422331
2598.79	11022	0			0.005238	0.085025	16.2338	190.93	11.7613	0.0616		1.09551	4.39935	4.01578	0.912813	0.227306	0.249017
2678.79	11022	0			0.006984	0.164993	23.6256	143.192	6.06087	0.042327		1.40831	8.03506	5.70545	0.710069	0.124455	0.175271
2758.79	11022	0			0.00557	0.061253	10.9977	179.547	16.3258	0.090928		1.10855	3.05964	2.76004	0.902079	0.326836	0.362314
2838.79	11022	0			0.00162	0.013652	8.42865	617.412	73.2516	0.118643		0.414679	0.883082	2.12955	2.4115	1.1324	0.469582
758.794	10942	0			0.005843	0.080133	13.7153	171.156	12.4792	0.072911		1.19824	4.0982	3.42019	0.83456	0.24401	0.292381
838.794	10942	0			0.008418	0.213476	25.3592	118.792	4.68436	0.039433		1.67521	10.1539	6.06124	0.596939	0.0984847	0.164983
918.794	10942	0			0.005963	0.365064	61.2209	167.699	2.73924	0.016334		1.2987	15.943	12.2762	0.770002	0.0627234	0.0814588
998.794	10942	0			0.008298	0.625276	75.35	120.507	1.59929	0.013271		1.70916	24.1424	14.1253	0.585081	0.0414209	0.0707951
1078.79	10942	0			0.010704	0.80203	74.931	93.4267	1.24684	0.013346		2.12642	29.7237	13.9783	0.470275	0.0336431	0.0715393
1158.79	10942	0			0.005663	0.116583	20.5855	176.573	8.57754	0.048578		1.20273	6.0056	4.99332	0.831445	0.166511	0.200267
1238.79	10942	0			0.002031	0.020721	10.2048	492.473	48.2592	0.097994		0.521939	1.34259	2.57232	1.91593	0.744828	0.388755
1318.79	10942	0			0.003384	0.043807	12.9472	295.55	22.8273	0.077237		0.734358	2.37665	3.23637	1.36173	0.42076	0.308988
1398.79	10942	0			0.002022	0.021336	10.551	494.525	46.8698	0.094777		0.480437	1.27391	2.65158	2.08144	0.784982	0.377134
1478.79	10942	0			0.92907	1.11506	1.20018	1.07635	0.896816	0.833205		5.36118	16.1073	3.00443	0.186526	0.0620837	0.332842
1558.79	10942	0			0.008897	0.360452	40.514	112.398	2.7743	0.024683		1.75292	16.1962	9.23955	0.570476	0.0617428	0.10823
1638.79	10942	0			0.013322	0.946548	71.0508	75.0631	1.05647	0.014074		2.5599	35.6323	13.9194	0.39064	0.0280644	0.071842
1718.79	10942	0			0.010151	0.982324	96.7678	98.509	1.01799	0.010334		2.00907	34.8651	17.3538	0.497742	0.028682	0.0576243
1798.79	10942	0			0.015573	0.877592	56.3527	64.2128	1.13948	0.017745		2.94326	34.8997	11.8575	0.339759	0.0286535	0.0843349
1878.79	10942	0			0.017343	1.61299	93.0066	57.6611	0.619968	0.010752		3.26432	52.949	16.2205	0.306343	0.0188861	0.0616502
1958.79	10942	0			0.0124	0.738518	59.557	80.644	1.35406	0.016791		2.43223	28.1763	11.5845	0.411145	0.0354909	0.0863219
2038.79	10942	0			0.002163	0.016414	7.58951	462.376	60.923	0.131761		0.546334	1.05379	1.92884	1.83038	0.948955	0.518447
2118.79	10942	0			0.000271	0.001686	6.21958	3688.72	593.082	0.160783		0.201511	0.319497	1.58551	4.96252	3.12992	0.630712
2198.79	10942	0			0.001848	0.013365	7.23325	541.19	74.8199	0.138251		0.470121	0.863099	1.83591	2.12711	1.15862	0.544689
2278.79	10942	0			0.005413	0.090122	16.6497	184.747	11.0961	0.060061		1.10157	4.54159	4.12283	0.907794	0.220187	0.242552
2358.79	10942	0			0.008844	0.39102	44.2128	113.07	2.55741	0.022618		1.74172	17.3867	9.98247	0.574144	0.0575152	0.100176
2438.79	10942	0			0.007265	0.384771	52.9633	137.649	2.59895	0.018881		1.46943	17.0029	11.5711	0.680536	0.0588133	0.086422
2518.79	10942	0			0.004153	0.04464	10.7489	240.794	22.4017	0.093032		0.891717	2.41127	2.70407	1.12143	0.414719	0.369812
2598.79	10942	0			0.000301	0.001497	4.98098	3327.37	668.014	0.200764		0.222493	0.284244	1.27754	4.49451	3.51811	0.782755
2678.79	10942	0			0.005659	0.084826	14.9896	176.709	11.7888	0.066713		1.17703	4.38	3.72123	0.849595	0.22831	0.268729
2758.79	10942	0			0.005481	0.082101	14.9792	182.449	12.1801	0.066759		1.1175	4.16181	3.72421	0.894855	0.24028	0.268513
2838.79	10942	0			0.014447	0.362485	25.0904	69.2179	2.75874	0.039856		2.71456	16.507	6.0809	0.368384	0.0605805	0.164449
758.794	10862	0			0.021139	1.06272	50.2739	47.3067	0.94098	0.019891		3.9216	38.5235	9.82342	0.254998	0.0259582	0.101798
838.794	10862	0			0.011131	0.689254	61.9236	89.8415	1.45084	0.016149		2.19671	26.9188	12.2542	0.455227	0.0371488	0.0816049
918.794	10862	0			0.022637	1.16627	51.5212	44.176	0.857434	0.019409		4.17495	47.4385	11.3627	0.239524	0.0210799	0.0880076
998.794	10862	0			0.012615	0.810886	64.2775	79.2683	1.23322	0.015558		2.42528	32.0302	13.2068	0.412324	0.0312205	0.0757185
1078.79	10862	0			0.009486	0.821384	86.5916	105.421	1.21746	0.011548		1.92676	29.2414	15.1765	0.519006	0.0341981	0.0658915
1158.79	10862	0			0.014225	1.07295	75.4293	70.3011	0.932013	0.013257		2.71998	39.1819	14.4052	0.367649	0.025522	0.0694193
1238.79	10862	0			0.010914	1.00489	92.0698	91.6222	0.995138	0.010861		2.13671	36.2081	16.9457	0.46801	0.0276181	0.0590119
1318.79	10862	0			0.006931	0.196901	28.4099	144.285	5.0787	0.035199		1.44557	9.58882	6.63327	0.691771	0.104288	0.150755
1398.79	10862	0			6.78234	0.017844	0.002631	0.147442	56.0414	380.091		13.4349	1.15119	0.0856865	0.0744328	0.868664	11.6704
1478.79	10862	0			0.004251	0.067807	15.9525	235.264	14.7477	0.062686		0.917955	3.62639	3.95051	1.08938	0.275756	0.253132
1558.79	10862	0			0.007478	0.491542	65.7292	133.72	2.03441	0.015214		1.53498	20.4687	13.3348	0.651472	0.0488551	0.0749919
1638.79	10862	0			0.014953	1.12576	75.2841	66.874	0.888289	0.013283		2.83422	42.1243	14.8627	0.35283	0.0237393	0.0672824
1718.79	10862	0			0.009713	0.432804	44.56	102.957	2.31051	0.022442		1.88651	19.1146	10.1322	0.53008	0.0523161	0.0986948
1798.79	10862	0			0.005075	0.175134	34.5113	197.056	5.70991	0.028976		1.08012	8.66232	8.01976	0.925822	0.115443	0.124692
1878.79	10862	0			0.011209	1.10966	98.9982	89.2152	0.90118	0.010101		2.18534	39.1552	17.9172	0.457595	0.0255394	0.0558122
1958.79	10862	0			0.011154	0.716311	64.2176	89.6505	1.39604	0.015572		2.1865	28.1291	12.8649	0.457353	0.0355504	0.0777308
2038.79	10862	0			0.002998	0.022776	7.59699	333.546	43.9049	0.131631		0.684876	1.32081	1.92854	1.46012	0.75711	0.518527
2118.79	10862	0			0.000256	0.00174	6.79421	3905.03	574.759	0.147184		0.190743	0.32949	1.72741	5.24267	3.03499	0.578902
2198.79	10862	0			0.000269	0.001779	6.6115	3715.48	561.972	0.151252		0.200113	0.336842	1.68326	4.99717	2.96875	0.594087
2278.79	10862	0			0.003703	0.034065	9.19954	270.058	29.3556	0.108701		0.803629	1.86701	2.32323	1.24436	0.535615	0.430436
2358.79	10862	0			0.008641	0.208253	24.1008	115.728	4.80184	0.041492		1.70191	9.8884	5.81016	0.587574	0.101129	0.172112
2438.79	10862	0			0.007808	0.345126	44.2013	128.073	2.89749	0.022624		1.57121	15.5247	9.88078	0.636454	0.0644133	0.101207
2518.79	10862	0			0.004807	0.06224	12.9477	208.027	16.0667	0.077234		0.985875	3.19079	3.2365	1.01433	0.313402	0.308975
2598.79	10862	0			0.003109	0.034913	11.231	321.686	28.6427	0.089039		0.685133	1.93152	2.81919	1.45957	0.517727	0.354712
2678.79	10862	0			0.007283	0.226771	31.137	137.306	4.40974	0.032116		1.47698	10.7659	7.2891	0.677057	0.0928863	0.137191
2758.79	10862	0			0.013181	0.533251	40.4563	75.8672	1.87529	0.024718		2.51679	22.9924	9.13558	0.397331	0.0434927	0.109462
838.794	10782	0			0.011502	0.738752	64.2306	86.9447	1.35363	0.015569		2.24673	28.9014	12.8638	0.445092	0.0346004	0.0777376
918.794	10782	0			0.006714	0.146887	21.8772	148.939	6.80797	0.04571		1.35137	7.19514	5.32435	0.739991	0.138983	0.187817
998.794	10782	0			0.010539	0.369981	35.1061	94.8862	2.70284	0.028485		2.04598	16.6226	8.12452	0.488763	0.060159	0.123084
1078.79	10782	0			0.009839	0.585373	59.4922	101.631	1.70831	0.016809		1.95902	23.7801	12.1388	0.51046	0.0420519	0.0823804
1158.79	10782	0			0.009161	0.301728	32.9347	109.154	3.31424	0.030363		1.80717	13.8452	7.66126	0.553351	0.0722272	0.130527
1238.79	10782	0			0.023834	1.51081	63.3888	41.9568	0.661896	0.015776		4.38526	58.6066	13.3644	0.228037	0.0170629	0.0748254
1318.79	10782	0			0.011274	0.984355	87.3151	88.7029	1.01589	0.011453		2.21914	34.7578	15.6628	0.450625	0.0287705	0.0638457
1398.79	10782	0			0.011306	0.692749	61.275	88.452	1.44352	0.01632		2.18864	28.1936	12.8818	0.456905	0.035469	0.0776289
1478.79	10782	0			0.009114	0.252718	27.7274	109.717	3.95698	0.036065		1.77498	11.7857	6.63993	0.563386	0.0848483	0.150604
1558.79	10782	0			0.011907	0.662882	55.6696	83.9811	1.50856	0.017963		2.29486	27.3322	11.9102	0.435757	0.0365869	0.0839617
1638.79	10782	0			0.014465	0.831307	57.471	69.1334	1.20293	0.0174		2.74046	33.6588	12.2822	0.364903	0.0297099	0.0814187
1718.79	10782	0			0.002222	0.032412	14.5887	450.102	30.8528	0.068546		0.547406	1.98678	3.62945	1.8268	0.503327	0.275524
1798.79	10782	0			0.011332	0.547372	48.3034	88.246	1.82691	0.020702		2.18572	23.3953	10.7037	0.457515	0.0427436	0.0934254
1878.79	10782	0			0.006786	0.687272	101.281	147.367	1.45503	0.009874		1.42365	25.552	17.9482	0.70242	0.0391359	0.0557157
1958.79	10782	0			0.005194	0.093462	17.9928	192.515	10.6995	0.055578		1.13235	4.9849	4.40226	0.88312	0.200606	0.227156
2038.79	10782	0			0.001832	0.011456	6.25305	545.843	87.2924	0.159922		0.48073	0.766428	1.5943	2.08017	1.30475	0.627235
2118.79	10782	0			0.000258	0.001748	6.78712	3883.48	572.184	0.147338		0.191763	0.330945	1.7258	5.21476	3.02165	0.579443
2198.79	10782	0			0.001881	0.012484	6.63735	531.679	80.1042	0.150663		0.486047	0.821224	1.6896	2.05741	1.21769	0.591857
2278.79	10782	0			0.002716	0.019883	7.32181	368.241	50.2937	0.136578		0.629076	1.1694	1.85891	1.58963	0.855142	0.537949
2358.79	10782	0			0.000257	0.002748	10.673	3884.16	363.925	0.093694		0.191731	0.514731	2.68465	5.21564	1.94276	0.372488
2438.79	10782	0			0.000238	0.002162	9.09195	4204.42	462.433	0.109987		0.177607	0.40765	2.29524	5.63041	2.45309	0.435685
2518.79	10782	0			0.92907	0.003366	0.003623	1.07635	297.092	276.019		5.36118	0.626358	0.116832	0.186526	1.59653	8.55929
2598.79	10782	0			0.006494	0.185601	28.5791	153.981	5.3879	0.034991		1.31616	8.96346	6.8103	0.759784	0.111564	0.146837
2678.79	10782	0			0.007766	0.492889	63.4682	128.768	2.02886	0.015756		1.62964	20.0808	12.3222	0.613631	0.0497987	0.0811541
838.794	10702	0			0.03058	2.43222	79.5352	32.7007	0.411147	0.012573		5.5411	81.7873	14.7601	0.18047	0.0122268	0.0677501
918.794	10702	0			0.007459	0.157862	21.1647	134.071	6.33465	0.047249		1.52319	7.79145	5.11521	0.656515	0.128346	0.195495
998.794	10702	0			0.00893	0.381828	42.7581	111.983	2.61898	0.023387		1.77029	16.9734	9.58794	0.564881	0.0589158	0.104298
1078.79	10702	0			0.008658	0.227163	26.2366	115.497	4.40212	0.038115		1.69698	10.6947	6.30222	0.589283	0.0935041	0.158674
1158.79	10702	0			0.00365	0.051979	14.239	273.938	19.2385	0.07023		0.789019	2.79891	3.54733	1.2674	0.357282	0.281902
1238.79	10702	0			0.010573	0.292134	27.6314	94.5846	3.42308	0.036191		2.04001	13.4601	6.59805	0.490194	0.0742938	0.15156
1318.79	10702	0			0.01106	0.481894	43.5719	90.4181	2.07515	0.022951		2.16001	20.7015	9.584	0.462961	0.0483056	0.104341
1398.79	10702	0			0.005123	0.134367	26.2277	195.194	7.4423	0.038128		1.09579	6.84874	6.25004	0.912583	0.146012	0.159999
1478.79	10702	0			0.92907	0.003559	0.003831	1.07635	280.966	261.037		5.36118	0.660943	0.123283	0.186526	1.51299	8.11142
1558.79	10702	0			0.007537	0.303081	40.212	132.677	3.29944	0.024868		1.49824	13.9011	9.27832	0.667451	0.0719367	0.107778
1638.79	10702	0			0.012847	0.813697	63.3393	77.8414	1.22896	0.015788		2.4778	31.6376	12.7684	0.403583	0.031608	0.0783183
1718.79	10702	0			0.009584	0.48318	50.4159	104.342	2.06962	0.019835		1.901	20.58	10.8259	0.52604	0.0485909	0.0923711
1798.79	10702	0			0.013234	0.904914	68.3789	75.5639	1.10508	0.014624		2.53865	34.7717	13.6969	0.39391	0.028759	0.073009
1878.79	10702	0			0.00785	1.30344	166.048	127.391	0.767199	0.006022		1.63146	37.3096	22.8688	0.612948	0.0268028	0.0437276
1958.79	10702	0			0.005644	1.12324	199.027	177.189	0.890279	0.005024		1.25388	31.2169	24.8962	0.797522	0.0320339	0.0401668
2038.79	10702	0			0.005642	0.085832	15.214	177.252	11.6506	0.065729		1.16962	4.41539	3.77507	0.854979	0.226481	0.264896
2118.79	10702	0			0.003001	0.032366	10.7866	333.267	30.8963	0.092707		0.662232	1.79475	2.71016	1.51004	0.55718	0.368982
2198.79	10702	0			0.000245	0.001701	6.94653	4083.81	587.893	0.143957		0.182675	0.322265	1.76415	5.47421	3.10303	0.566846
2278.79	10702	0			0.000262	0.001839	7.02426	3819.88	543.813	0.142364		0.194841	0.347865	1.78538	5.13239	2.87468	0.560105
2358.79	10702	0			0.004398	0.08022	18.2405	227.38	12.4656	0.054823		0.918719	4.13385	4.49959	1.08847	0.241905	0.222243
2438.79	10702	0			0.003832	0.065716	17.1502	260.974	15.217	0.058308		0.818998	3.47382	4.24154	1.221	0.287868	0.235763
2518.79	10702	0			0.003354	0.064265	19.1603	298.144	15.5605	0.052191		0.753396	3.54255	4.70211	1.32732	0.282283	0.212671
2598.79	10702	0			0.00936	0.637323	68.0916	106.84	1.56906	0.014686		1.86958	25.3534	13.5611	0.534881	0.0394424	0.0737405
918.794	10622	0			0.022482	1.14596	50.9722	44.4799	0.872631	0.019619		4.14723	45.3444	10.9337	0.241125	0.0220534	0.0914608
998.794	10622	0			0.004817	0.07025	14.5845	207.608	14.2348	0.068566		0.99977	3.62892	3.62976	1.00023	0.275564	0.2755
1078.79	10622	0			0.006774	0.101261	14.9492	147.63	9.87545	0.066893		1.34548	5.00187	3.71755	0.743231	0.199925	0.268995
1158.79	10622	0			0.001584	0.014677	9.2659	631.34	68.1359	0.107923		0.411293	0.961173	2.33696	2.43136	1.04039	0.427907
1238.79	10622	0			0.004552	0.078043	17.1444	219.679	12.8135	0.058328		0.942804	3.99955	4.24218	1.06067	0.250028	0.235728
1318.79	10622	0			0.015415	0.56643	36.7444	64.8702	1.76544	0.027215		2.89464	24.7963	8.56629	0.345467	0.0403286	0.116737
1398.79	10622	0			0.004983	0.080702	16.1955	200.682	12.3912	0.061746		1.02568	4.11782	4.01471	0.974961	0.242847	0.249084
1478.79	10622	0			0.00236	0.0304	12.8829	423.775	32.8944	0.077622		0.538466	1.73429	3.2208	1.85713	0.576605	0.310482
1558.79	10622	0			0.010782	0.264867	24.5667	92.7509	3.77548	0.040706		2.06341	12.2871	5.95477	0.484635	0.081386	0.167933
1638.79	10622	0			0.010079	1.23382	122.417	99.2174	0.810488	0.008169		2.00923	39.3526	19.586	0.497704	0.0254113	0.0510569
1718.79	10622	0			0.004712	0.446398	94.7361	212.224	2.24016	0.010556		1.10049	17.9488	16.3098	0.908684	0.0557139	0.0613128
1798.79	10622	0			0.007922	0.747151	94.3174	126.236	1.33842	0.010602		1.64304	27.0623	16.4708	0.608626	0.0369518	0.0607135
1878.79	10622	0			0.005702	0.655103	114.885	175.369	1.52648	0.008704		1.30574	22.6563	17.3514	0.765852	0.0441378	0.0576323
1958.79	10622	0			0.009797	0.512256	52.2848	102.068	1.95215	0.019126		1.94763	21.4841	11.0309	0.513444	0.0465461	0.0906547
2038.79	10622	0			0.004262	0.202681	47.5504	234.607	4.93386	0.02103		0.9619	10.0155	10.4122	1.03961	0.0998453	0.0960412
2118.79	10622	0			0.002857	0.025244	8.83718	350.073	39.6136	0.113158		0.654141	1.46148	2.23419	1.52872	0.68424	0.44759
2198.79	10622	0			0.001566	0.010528	6.7215	638.414	94.981	0.148776		0.424056	0.724826	1.70927	2.35818	1.37964	0.585045
2278.79	10622	0			0.003255	0.040413	12.4148	307.196	24.7443	0.080549		0.730965	2.27182	3.10798	1.36805	0.440175	0.321753
2358.79	10622	0			0.003322	0.086226	25.9539	300.998	11.5974	0.03853		0.769171	4.77497	6.20794	1.3001	0.209425	0.161084
2438.79	10622	0			0.005017	0.136781	27.2633	199.321	7.31097	0.036679		1.0575	6.89049	6.51585	0.94563	0.145128	0.153472
2518.79	10622	0			0.006798	0.436661	64.2381	147.112	2.29011	0.015567		1.39978	18.6947	13.3554	0.714397	0.0534912	0.074876
1078.79	10542	0			0.012862	0.311191	24.195	77.7498	3.21346	0.041331		2.46874	14.2501	5.77224	0.405066	0.0701748	0.173243
1158.79	10542	0			0.00973	0.226765	23.3049	102.771	4.40986	0.042909		1.91827	10.7186	5.58761	0.521303	0.0932962	0.178967
1238.79	10542	0			0.007563	0.162798	21.5249	132.218	6.14257	0.046458		1.50185	7.87597	5.2442	0.665847	0.126968	0.190687
1318.79	10542	0			0.007129	0.155818	21.8581	140.28	6.41776	0.04575		1.446	7.65353	5.29292	0.691565	0.130659	0.188932
1398.79	10542	0			0.005306	0.080537	15.1772	188.452	12.4167	0.065888		1.09888	4.1415	3.76882	0.910014	0.241459	0.265335
1478.79	10542	0			0.92907	0.002678	0.002883	1.07635	373.4	346.915		5.36118	0.502046	0.0936447	0.186526	1.99185	10.6787
1558.79	10542	0			0.003119	0.030565	9.80069	320.649	32.7169	0.102034		0.687344	1.69698	2.46889	1.45487	0.589283	0.40504
1638.79	10542	0			0.004683	0.071356	15.2362	213.524	14.0142	0.065633		0.978263	3.70264	3.78492	1.02222	0.270077	0.264207
1718.79	10542	0			0.015217	0.538878	35.4128	65.7159	1.85571	0.028238		2.86704	23.5351	8.20884	0.348791	0.0424897	0.12182
1798.79	10542	0			0.006334	0.338159	53.3902	157.885	2.95719	0.01873		1.33102	15.1452	11.3787	0.751305	0.0660273	0.0878835
1878.79	10542	0			0.000513	0.058757	114.62	1950.76	17.0193	0.008724		0.368782	6.8678	18.6229	2.71163	0.145607	0.0536972
1958.79	10542	0			0.006957	0.493856	70.9842	143.735	2.02488	0.014088		1.44511	20.4062	14.1208	0.691989	0.0490048	0.0708174
2038.79	10542	0			0.004244	0.071949	16.9521	235.612	13.8987	0.05899		0.903731	3.78689	4.19028	1.10652	0.264069	0.238647
2118.79	10542	0			0.002477	0.035798	14.4522	403.713	27.9343	0.069193		0.582434	2.09567	3.59813	1.71693	0.477174	0.277922
2198.79	10542	0			0.002377	0.030362	12.7739	420.714	32.9356	0.078285		0.556828	1.77874	3.19441	1.79589	0.562196	0.313047
2278.79	10542	0			0.004846	0.10297	21.2499	206.369	9.71156	0.047059		1.04297	5.37957	5.15796	0.958804	0.185888	0.193875
2358.79	10542	0			0.004484	0.147826	32.9693	223.027	6.76469	0.030331		1.00621	7.64555	7.59838	0.99383	0.130795	0.131607
2438.79	10542	0			0.005601	0.202637	36.1773	178.532	4.93492	0.027642		1.2036	9.89902	8.22452	0.830842	0.10102	0.121588
1158.79	10462	0			0.034878	68.7219	1970.37	28.6716	0.014551	0.000508		6.26309	249.551	39.8446	0.159666	0.0040072	0.0250975
1238.79	10462	0			0.020538	1.36408	66.4164	48.6894	0.733094	0.015057		3.81201	49.5632	13.0019	0.262329	0.0201763	0.0769121
1318.79	10462	0			0.003646	0.055156	15.1262	274.246	18.1305	0.06611		0.786887	2.95867	3.75997	1.27083	0.337989	0.265959
1398.79	10462	0			0.003775	0.048268	12.7862	264.902	20.7178	0.078209		0.801121	2.56147	3.19736	1.24825	0.390401	0.312758
1478.79	10462	0			0.005468	0.084301	15.4163	182.873	11.8623	0.064866		1.10541	4.23464	3.83082	0.904638	0.236147	0.261041
1558.79	10462	0			0.000235	0.002413	10.2553	4250.7	414.487	0.09751		0.175736	0.453576	2.58101	5.69035	2.2047	0.387445
1638.79	10462	0			0.001742	0.014513	8.33035	574.003	68.905	0.120043		0.443841	0.935017	2.10665	2.25306	1.0695	0.474687
1718.79	10462	0			0.001992	0.019488	9.78501	502.105	51.3137	0.102197		0.487781	1.20254	2.46534	2.0501	0.83157	0.405624
1798.79	10462	0			0.005638	0.062287	11.0484	177.378	16.0546	0.090511		1.15863	3.21797	2.77739	0.863087	0.310755	0.36005
1878.79	10462	0			0.006403	0.305539	47.7199	156.183	3.27291	0.020956		1.32365	13.9633	10.5491	0.755486	0.0716165	0.0947952
1958.79	10462	0			0.006593	0.147828	22.4203	151.665	6.76464	0.044602		1.32976	7.24466	5.44808	0.752013	0.138033	0.183551
2038.79	10462	0			0.000228	0.002297	10.0706	4383.87	435.312	0.099299		0.170566	0.432416	2.53518	5.86282	2.31259	0.394449
2118.79	10462	0			0.002845	0.043899	15.4287	351.459	22.7796	0.064814		0.629638	2.41478	3.83518	1.58821	0.414117	0.260744
2198.79	10462	0			0.004018	0.087306	21.7306	248.901	11.454	0.046018		0.87169	4.6134	5.29247	1.1472	0.21676	0.188948
2278.79	10462	0			0.003754	0.125012	33.3007	266.38	7.99924	0.030029		0.857101	6.63109	7.73665	1.16672	0.150805	0.129255
2358.79	10462	0			0.009862	0.559851	56.7713	101.404	1.78619	0.017615		1.94541	23.2764	11.9648	0.51403	0.042962	0.0835788
1238.79	10382	0			0.035513	3.42322	96.3933	28.1587	0.292123	0.010374		6.39688	108.74	16.9989	0.156326	0.00919628	0.0588275
1318.79	10382	0			0.011093	0.442433	39.8827	90.1442	2.26023	0.025074		2.14266	19.4815	9.0922	0.466709	0.0513307	0.109984
1398.79	10382	0			0.00456	0.070552	15.4716	219.292	14.1739	0.064635		0.957879	3.6788	3.84057	1.04397	0.271828	0.260378
1478.79	10382	0			0.008564	0.263666	30.7884	116.77	3.79267	0.03248		1.72829	12.3056	7.12009	0.578607	0.0812641	0.140448
1558.79	10382	0			0.000541	0.018168	33.5795	1848.31	55.0429	0.02978		0.387756	2.91895	7.52781	2.57894	0.342589	0.132841
1638.79	10382	0			0.005492	0.075194	13.6923	182.094	13.299	0.073034		1.14009	3.89275	3.41442	0.877123	0.256888	0.292875
1718.79	10382	0			0.00245	0.028505	11.6369	408.239	35.0813	0.085933		0.565339	1.64968	2.91803	1.76885	0.606179	0.342697
1798.79	10382	0			0.003126	0.033382	10.6776	319.86	29.9561	0.093654		0.698002	1.87428	2.68521	1.43266	0.533538	0.372411
1878.79	10382	0			0.011548	0.313426	27.1408	86.594	3.19055	0.036845		2.20322	14.3728	6.52355	0.453882	0.0695759	0.153291
1958.79	10382	0			0.006289	0.109364	17.389	159.001	9.14377	0.057507		1.2472	5.36707	4.30329	0.801794	0.186321	0.23238
2038.79	10382	0			0.001732	0.018739	10.8214	577.493	53.3658	0.092409		0.430071	1.16896	2.71808	2.3252	0.855458	0.367907
2118.79	10382	0			0.001522	0.018601	12.2172	656.816	53.7616	0.081852		0.388	1.18681	3.05878	2.57732	0.842598	0.326928
2198.79	10382	0			0.003341	0.057681	17.2636	299.296	17.3368	0.057925		0.7356	3.13855	4.26666	1.35944	0.318618	0.234376
2278.79	10382	0			0.00251	0.031112	12.3956	398.424	32.1423	0.080674		0.606174	1.88132	3.1036	1.64969	0.531542	0.322207
1478.79	10302	0			0.017339	1.8221	105.085	57.6726	0.548818	0.009516		3.28588	51.5998	15.7035	0.304332	0.0193799	0.0636802
1558.79	10302	0			0.018645	2.78851	149.555	53.6325	0.358614	0.006687		3.49408	71.1491	20.3627	0.286198	0.014055	0.0491093
1638.79	10302	0			0.007564	0.967526	127.92	132.214	1.03356	0.007817		1.60959	30.2408	18.7878	0.621274	0.0330679	0.053226
1718.79	10302	0			0.00567	1.10242	194.446	176.382	0.907098	0.005143		1.284	29.8361	23.2368	0.778816	0.0335164	0.0430351
1798.79	10302	0			0.009861	0.394795	40.035	101.407	2.53296	0.024978		1.93634	17.5088	9.04222	0.516439	0.0571142	0.110592
1878.79	10302	0			0.003317	0.046911	14.1441	301.514	21.3172	0.070701		0.723953	2.55201	3.5251	1.3813	0.391848	0.28368
1958.79	10302	0			6.79968	0.018627	0.002739	0.147066	53.6848	365.04		13.4589	1.19949	0.0891227	0.0743005	0.833688	11.2205
2038.79	10302	0			0.001957	0.022424	11.4565	510.912	44.5957	0.087286		0.48327	1.38919	2.87456	2.06924	0.719845	0.34788
2118.79	10302	0			0.003009	0.034982	11.6256	332.329	28.5859	0.086017		0.665245	1.93936	2.91526	1.50321	0.515634	0.343023
2198.79	10302	0			0.002767	0.035295	12.7579	361.461	28.3324	0.078383		0.639628	2.04084	3.19066	1.56341	0.489995	0.313415
1638.79	10222	0			0.019406	1.81466	93.509	51.5299	0.551068	0.010694		3.61898	58.724	16.2267	0.276321	0.0170288	0.0616269
1718.79	10222	0			0.013773	1.27045	92.2446	72.6076	0.787121	0.010841		2.6794	40.1407	14.9812	0.373218	0.0249124	0.0667503
1798.79	10222	0			0.018447	1.47346	79.8774	54.2107	0.678674	0.012519		3.45156	51.2184	14.8392	0.289724	0.0195242	0.067389
1878.79	10222	0			0.018393	1.03034	56.0189	54.3694	0.970554	0.017851		3.43861	39.951	11.6184	0.290815	0.0250307	0.0860706
1958.79	10222	0			0.006408	0.35476	55.3621	156.055	2.8188	0.018063		1.33811	15.7637	11.7806	0.747324	0.0634369	0.0848854
1078.79	8302	0			0.207662	138.085	664.952	4.81553	0.007242	0.001504		31.7112	489.059	15.4223	0.0315346	0.00204474	0.0648413
1158.79	8302	0			0.041098	1.11774	27.1972	24.3323	0.894663	0.036769		7.39811	47.4663	6.416	0.13517	0.0210676	0.15586
838.794	8222	0			0.129985	169.598	1304.75	7.69321	0.005896	0.000766		21.8265	597.87	27.392	0.0458159	0.0016726	0.0365071
918.794	8222	0			0.07455	1.89506	25.4201	13.4139	0.527687	0.039339		13.0899	77.9332	5.95368	0.0763946	0.0128315	0.167963
998.794	8222	0			0.208374	93.5162	448.79	4.79906	0.010693	0.002228		29.4567	335.164	11.3782	0.0339481	0.00298361	0.0878875
1078.79	8222	0			0.285447	25.2063	88.3049	3.50328	0.039673	0.011324		21.427	99.2934	4.63403	0.0466701	0.0100712	0.215795
1158.79	8222	0			0.022959	0.347079	15.1176	43.5568	2.88119	0.066148		4.22983	15.8242	3.74111	0.236416	0.0631942	0.267301
1238.79	8222	0			0.014642	0.218864	14.9478	68.2973	4.56905	0.066899		2.77922	10.2962	3.70473	0.359814	0.0971229	0.269925
1318.79	8222	0			0.034636	1.06533	30.7578	28.8717	0.938679	0.032512		6.17607	41.9724	6.79598	0.161915	0.0238252	0.147146
1398.79	8222	0			0.026891	0.939909	34.9522	37.1868	1.06393	0.028611		4.85976	35.166	7.23617	0.205772	0.0284365	0.138195
1478.79	8222	0			0.068176	2.93973	43.1195	14.6678	0.340168	0.023191		10.9335	80.9253	7.40157	0.0914617	0.0123571	0.135107
1558.79	8222	0			0.059338	2.54479	42.8865	16.8526	0.39296	0.023317		9.72419	73.555	7.56413	0.102836	0.0135953	0.132203
1638.79	8222	0			0.017404	0.275158	15.8101	57.458	3.63427	0.063251		3.27806	12.7451	3.88799	0.305059	0.0784618	0.257202
1718.79	8222	0			0.051173	0.71707	14.0125	19.5414	1.39456	0.071365		9.13256	31.8307	3.48541	0.109498	0.0314162	0.28691
758.794	8142	0			0.183127	54.8469	299.502	5.46068	0.018233	0.003339		23.487	201.641	8.58522	0.0425767	0.00495931	0.116479
838.794	8142	0			0.058448	52.4087	896.668	17.1091	0.019081	0.001115		9.77977	193.222	19.7573	0.102252	0.00517539	0.0506141
918.794	8142	0			0.032728	1.70473	52.0882	30.555	0.586602	0.019198		5.85723	59.192	10.1058	0.170729	0.0168942	0.0989531
998.794	8142	0			0.184917	60.5134	327.247	5.40784	0.016525	0.003056		24.297	221.207	9.10428	0.0411573	0.00452065	0.109838
1078.79	8142	0			0.118194	21.9745	185.919	8.46068	0.045507	0.005379		13.6425	88.1339	6.46024	0.0733004	0.0113464	0.154793
1158.79	8142	0			0.06792	101.421	1493.25	14.7232	0.00986	0.00067		11.7231	362.46	30.9184	0.0853017	0.00275893	0.0323432
1238.79	8142	0			0.006606	0.123349	18.671	151.368	8.10711	0.053559		1.38264	6.29446	4.55249	0.723253	0.15887	0.21966
1318.79	8142	0			0.021785	1.36599	62.7035	45.9032	0.732069	0.015948		4.0333	41.0325	10.1734	0.247936	0.0243709	0.0982953
1398.79	8142	0			0.067936	38.941	573.204	14.7198	0.02568	0.001745		10.7048	146.718	13.7058	0.0934156	0.00681578	0.0729619
1478.79	8142	0			0.031227	1.53573	49.1789	32.0232	0.651157	0.020334		5.38478	40.2514	7.47502	0.185708	0.0248439	0.133779
1558.79	8142	0			0.020347	1.45242	71.382	49.147	0.688507	0.014009		3.79943	43.3816	11.4179	0.263197	0.0230512	0.0875817
1638.79	8142	0			0.01364	0.197686	14.4931	73.3139	5.05852	0.068998		2.63629	9.4644	3.59004	0.379321	0.105659	0.278548
1718.79	8142	0			0.018171	0.228122	12.5543	55.0332	4.38363	0.079654		3.39618	10.6749	3.1432	0.294448	0.093678	0.318147
1798.79	8142	0			0.044049	2.11056	47.9138	22.7019	0.473807	0.020871		7.84821	78.9725	10.0625	0.127418	0.0126626	0.099379
1878.79	8142	0			0.057202	54.7074	956.394	17.482	0.018279	0.001046		9.6365	201.159	20.8747	0.103772	0.00497119	0.0479048
678.794	8062	0			0.073183	3.28557	44.8951	13.6643	0.304361	0.022274		11.9998	96.3277	8.02744	0.0833348	0.0103812	0.124573
758.794	8062	0			0.04796	1.4642	30.5295	20.8507	0.682969	0.032755		7.98405	48.7359	6.10416	0.12525	0.0205187	0.163823
838.794	8062	0			0.011627	0.433874	37.3168	86.0083	2.30482	0.026798		2.32551	18.4923	7.95192	0.430013	0.0540766	0.125756
918.794	8062	0			0.015018	1.00014	66.5983	66.5888	0.999858	0.015015		2.90172	34.3976	11.8542	0.344623	0.0290718	0.0843583
998.794	8062	0			0.065616	82.7225	1260.7	15.2401	0.012089	0.000793		11.2126	297.894	26.5679	0.0891856	0.0033569	0.0376395
1078.79	8062	0			0.021156	0.466838	22.066	47.2669	2.14207	0.045319		3.91592	20.7988	5.31135	0.255368	0.0480797	0.188276
1158.79	8062	0			0.004828	0.068606	14.2111	207.141	14.576	0.070367		1.06544	3.76441	3.53321	0.938583	0.265646	0.283029
1238.79	8062	0			0.03284	1.1088	33.7639	30.4508	0.901876	0.029617		5.9043	44.0996	7.46906	0.169368	0.0226759	0.133886
1318.79	8062	0			0.052632	2.65002	50.3496	18.9997	0.377355	0.019861		8.65904	70.4545	8.13653	0.115486	0.0141936	0.122902
1398.79	8062	0			0.020695	1.14459	55.3064	48.3199	0.873676	0.018081		3.85666	37.5866	9.74589	0.259291	0.0266052	0.102607
1478.79	8062	0			0.016916	0.514826	30.434	59.115	1.9424	0.032858		3.21119	21.7641	6.77757	0.311411	0.0459472	0.147545
1558.79	8062	0			0.064079	3.54612	55.3399	15.6058	0.281999	0.01807		10.8381	105.461	9.73051	0.0922669	0.00948222	0.10277
1638.79	8062	0			0.022607	1.64214	72.6398	44.2349	0.608963	0.013767		4.16425	47.0042	11.2876	0.240139	0.0212747	0.088593
1718.79	8062	0			0.006867	0.07837	11.4129	145.627	12.7599	0.08762		1.42478	4.0912	2.87146	0.701864	0.244427	0.348254
1798.79	8062	0			0.016304	0.251001	15.3947	61.3334	3.98405	0.064957		3.0553	11.6642	3.81768	0.3273	0.0857327	0.261939
1878.79	8062	0			0.023996	0.555918	23.1671	41.6735	1.79882	0.043165		4.40594	24.1348	5.47778	0.226966	0.0414339	0.182556
1958.79	8062	0			0.01591	0.365998	23.0037	62.852	2.73226	0.043471		3.07649	16.1796	5.25911	0.325046	0.0618062	0.190146
2038.79	8062	0			0.025304	0.451152	17.8296	39.5202	2.21655	0.056087		4.63451	20.166	4.35127	0.215772	0.0495884	0.229818
598.794	7982	0			0.025633	0.721003	28.1283	39.0127	1.38696	0.035551		4.68925	30.5511	6.51514	0.213254	0.0327321	0.153489
678.794	7982	0			0.012083	0.278643	23.0612	82.7626	3.58882	0.043363		2.35672	12.9018	5.47447	0.424319	0.0775086	0.182666
758.794	7982	0			0.005632	0.079536	14.1223	177.558	12.5729	0.07081		1.22027	4.28419	3.51086	0.819493	0.233416	0.28483
838.794	7982	0			0.005586	0.072917	13.0546	179.035	13.7143	0.076601		1.18702	3.87156	3.26158	0.842445	0.258294	0.3066
918.794	7982	0			0.003842	0.044191	11.5027	260.295	22.6291	0.086936		0.870471	2.51607	2.89046	1.1488	0.397446	0.345965
998.794	7982	0			0.004049	0.046213	11.4121	246.946	21.6389	0.087626		0.920415	2.64158	2.86999	1.08647	0.378561	0.348433
1078.79	7982	0			0.011996	0.201604	16.8057	83.3598	4.96021	0.059504		2.30928	9.55667	4.13837	0.433035	0.104639	0.241641
1158.79	7982	0			0.030966	1.82684	58.995	32.2935	0.547394	0.016951		5.57973	63.2073	11.328	0.17922	0.015821	0.0882767
1238.79	7982	0			0.020709	10.2986	497.314	48.2893	0.0971	0.002011		3.89205	47.8178	12.286	0.256934	0.0209127	0.0813935
1318.79	7982	0			0.050456	2.74809	54.4645	19.8191	0.36389	0.018361		8.43906	74.5471	8.83359	0.118497	0.0134143	0.113204
1398.79	7982	0			0.009863	0.193575	19.6261	101.388	5.16596	0.050952		1.95483	9.30612	4.76057	0.511552	0.107456	0.210059
1478.79	7982	0			0.002836	0.029943	10.5586	352.622	33.3966	0.09471		0.706237	1.88158	2.66423	1.41596	0.531468	0.375342
1558.79	7982	0			0.079832	65.5736	821.397	12.5263	0.01525	0.001217		13.0077	238.68	18.3491	0.0768776	0.00418972	0.0544985
1638.79	7982	0			9.14112	10.971	1.20018	0.109396	0.091149	0.833205		16.6885	50.1395	3.00443	0.0599213	0.0199443	0.332842
1718.79	7982	0			0.031144	1.16996	37.5659	32.1089	0.854734	0.02662		5.61115	45.426	8.09567	0.178217	0.0220138	0.123523
1798.79	7982	0			0.004586	0.054349	11.8506	218.048	18.3998	0.084384		0.992369	2.95071	2.9734	1.00769	0.338902	0.336316
1878.79	7982	0			0.00704	0.088039	12.5054	142.044	11.3586	0.079965		1.46815	4.59825	3.13201	0.68113	0.217474	0.319284
1958.79	7982	0			0.019323	0.462075	23.9127	51.7508	2.16415	0.041819		3.61948	19.9731	5.51823	0.276283	0.0500673	0.181217
2038.79	7982	0			0.021527	0.506203	23.5153	46.4543	1.97549	0.042526		3.98762	21.5596	5.40663	0.250776	0.0463831	0.184958
2118.79	7982	0			0.021806	0.245073	11.2388	45.8588	4.08041	0.088978		4.03006	11.4157	2.83264	0.248135	0.0875985	0.353028
2198.79	7982	0			0.104974	2.49572	23.7746	9.52614	0.400686	0.042062		18.2907	102.566	5.60754	0.0546727	0.00974986	0.178331
598.794	7902	0			0.009719	0.130938	13.4723	102.89	7.63718	0.074226		1.91476	6.43395	3.36018	0.522259	0.155426	0.297603
678.794	7902	0			0.010471	0.165603	15.8158	95.5043	6.03854	0.063228		2.0499	8.00737	3.90622	0.487828	0.124885	0.256002
758.794	7902	0			0.006892	0.095515	13.8596	145.103	10.4695	0.072152		1.40518	4.85173	3.45274	0.711651	0.206112	0.289625
838.794	7902	0			0.004968	0.061338	12.346	201.278	16.3031	0.080998		1.05718	3.26907	3.09225	0.94591	0.305897	0.323389
918.794	7902	0			0.003802	0.0446	11.7293	262.991	22.4217	0.085257		0.849099	2.49958	2.9438	1.17772	0.400067	0.339697
998.794	7902	0			0.03144	1.29408	41.1601	31.8064	0.772748	0.024295		5.67108	49.8503	8.79026	0.176333	0.0200601	0.113762
1078.79	7902	0			0.053369	39.5879	741.783	18.7376	0.02526	0.001348		8.83485	148.952	16.8597	0.113188	0.00671355	0.0593132
1158.79	7902	0			0.056762	17.6165	310.355	17.6173	0.056765	0.003222		8.31632	73.086	8.78827	0.120246	0.0136825	0.113788
1238.79	7902	0			0.043712	23.7109	542.437	22.8771	0.042175	0.001844		7.16895	94.1297	13.1302	0.13949	0.0106236	0.0761604
1318.79	7902	0			0.012918	0.999776	77.3946	77.4119	1.00022	0.012921		2.53845	33.9418	13.3711	0.393941	0.0294622	0.0747884
1398.79	7902	0			0.014278	0.228819	16.0255	70.0357	4.37026	0.062401		2.70239	10.7085	3.96259	0.370042	0.093384	0.25236
1478.79	7902	0			0.003704	0.038279	10.3336	269.957	26.1243	0.096772		0.838938	2.18697	2.60683	1.19198	0.457254	0.383607
1558.79	7902	0			0.037381	27.9576	747.918	26.7519	0.035768	0.001337		6.40925	108.793	16.9744	0.156024	0.00919174	0.0589121
1638.79	7902	0			0.052028	21.6636	416.381	19.2203	0.04616	0.002402		8.08223	87.0606	10.7718	0.123728	0.0114863	0.0928346
1718.79	7902	0			0.92907	1.11506	1.20018	1.07635	0.896816	0.833205		5.36118	16.1073	3.00443	0.186526	0.0620837	0.332842
1798.79	7902	0			0.038751	19.1843	495.06	25.8055	0.052126	0.00202		6.41136	78.4995	12.2438	0.155973	0.0127389	0.0816739
1878.79	7902	0			0.045605	23.9041	524.157	21.9275	0.041834	0.001908		7.41284	94.7968	12.7882	0.134901	0.0105489	0.0781972
1958.79	7902	0			0.034299	15.0724	439.447	29.1557	0.066346	0.002276		5.73946	64.3014	11.2034	0.174232	0.0155518	0.0892587
2038.79	7902	0			0.022198	0.8751	39.4229	45.0496	1.14273	0.025366		4.09871	31.7794	7.75351	0.243979	0.0314669	0.128974
2118.79	7902	0			0.024404	0.427242	17.5071	40.977	2.3406	0.05712		4.47476	19.0756	4.26294	0.223476	0.0524229	0.23458
2198.79	7902	0			0.017635	0.137761	7.81169	56.7047	7.25895	0.128013		3.30359	6.59981	1.99777	0.302701	0.15152	0.500558
2278.79	7902	0			0.068157	0.674678	9.89887	14.672	1.48219	0.101022		12.1033	30.3484	2.50746	0.0826223	0.0329507	0.398811
2358.79	7902	0			0.08473	2.31018	27.2653	11.8022	0.432866	0.036677		14.8756	94.4327	6.34817	0.0672243	0.0105896	0.157526
598.794	7822	0			0.010005	0.124024	12.396	99.9485	8.06297	0.080671		1.94315	6.03174	3.1041	0.514627	0.16579	0.322155
678.794	7822	0			0.003613	0.036329	10.0546	276.762	27.5259	0.099457		0.818816	2.0784	2.5383	1.22128	0.481139	0.393964
758.794	7822	0			0.003807	0.036776	9.66136	262.707	27.1915	0.103505		0.857466	2.09494	2.44318	1.16623	0.477341	0.409303
838.794	7822	0			0.002876	0.028379	9.86851	347.735	35.2368	0.101332		0.668926	1.6654	2.48967	1.49493	0.600455	0.40166
918.794	7822	0			0.003152	0.029247	9.27883	317.257	34.1915	0.107772		0.71655	1.68018	2.34482	1.39558	0.595175	0.426473
998.794	7822	0			0.01711	0.321887	18.8133	58.4468	3.10668	0.053154		3.20593	14.7368	4.59674	0.311922	0.0678571	0.217546
1078.79	7822	0			0.040247	2.32971	57.8851	24.8465	0.429238	0.017276		7.03904	72.2766	10.268	0.142065	0.0138357	0.0973903
1158.79	7822	0			0.046843	35.1609	750.609	21.3479	0.028441	0.001332		7.85126	133.666	17.0248	0.127368	0.00748134	0.0587379
1238.79	7822	0			0.02147	1.26266	58.8109	46.5771	0.79198	0.017004		3.98185	39.9825	10.0412	0.251139	0.0250109	0.0995898
1318.79	7822	0			0.010459	0.309137	29.5565	95.6097	3.23481	0.033833		2.0773	14.1197	6.79714	0.481394	0.0708229	0.147121
1398.79	7822	0			0.003298	0.033008	10.0076	303.184	30.2952	0.099924		0.753467	1.9027	2.52526	1.3272	0.525569	0.395999
1478.79	7822	0			0.006649	0.095727	14.3979	150.405	10.4464	0.069455		1.37787	4.9295	3.57763	0.725759	0.20286	0.279515
1558.79	7822	0			0.035212	16.0003	454.402	28.3996	0.062499	0.002201		5.87863	67.5054	11.4832	0.170108	0.0148136	0.0870839
1638.79	7822	0			0.044144	8.25626	187.032	22.6534	0.12112	0.005347		6.28994	40.7655	6.48108	0.158984	0.0245305	0.154295
1718.79	7822	0			0.92907	1.11506	1.20018	1.07635	0.896816	0.833205		5.36118	16.1073	3.00443	0.186526	0.0620837	0.332842
1798.79	7822	0			0.095114	13.0456	137.157	10.5137	0.076654	0.007291		10.3286	57.3028	5.54797	0.0968186	0.0174512	0.180246
1878.79	7822	0			0.090563	15.2002	167.84	11.042	0.065789	0.005958		10.5754	64.7425	6.12202	0.0945595	0.0154458	0.163345
1958.79	7822	0			0.083232	16.1934	194.558	12.0147	0.061754	0.00514		10.295	68.172	6.62187	0.0971347	0.0146688	0.151015
2038.79	7822	0			0.073799	26.3107	356.52	13.5504	0.038007	0.002805		10.6825	103.107	9.65194	0.0936113	0.0096987	0.103606
2118.79	7822	0			0.033346	1.20445	36.1196	29.9884	0.830253	0.027686		5.87548	42.5815	7.24734	0.170199	0.0234844	0.137982
2198.79	7822	0			0.010948	0.123387	11.2704	91.3422	8.10459	0.088728		2.19725	6.25753	2.8479	0.455115	0.159807	0.351136
2278.79	7822	0			0.010047	0.082153	8.17721	99.5358	12.1723	0.122291		1.97382	4.11485	2.08471	0.506631	0.243022	0.479683
2358.79	7822	0			0.044607	0.655189	14.6881	22.4181	1.52628	0.068082		8.05177	29.3865	3.6497	0.124196	0.0340292	0.273995
2438.79	7822	0			0.029943	0.456056	15.2306	33.3964	2.19271	0.065657		5.46207	20.6275	3.77649	0.183081	0.0484791	0.264796
518.794	7742	0			0.099611	111.336	1117.7	10.039	0.008982	0.000895		16.6033	396.695	23.8926	0.0602291	0.00252083	0.041854
598.794	7742	0			0.018475	0.723186	39.1432	54.126	1.38277	0.025547		3.46399	29.2943	8.45683	0.288685	0.0341363	0.118248
678.794	7742	0			0.011043	0.160739	14.5559	90.5563	6.22126	0.068701		2.17021	7.83294	3.60931	0.460785	0.127666	0.277062
758.794	7742	0			0.006223	0.062512	10.0454	160.696	15.997	0.099548		1.30456	3.31478	2.54091	0.76654	0.30168	0.39356
838.794	7742	0			0.92907	0.001695	0.001825	1.07635	589.818	547.982		5.36118	0.321233	0.0599183	0.186526	3.11301	16.6894
918.794	7742	0			0.92907	0.001202	0.001294	1.07635	831.741	772.746		5.36118	0.229027	0.0427195	0.186526	4.3663	23.4085
998.794	7742	0			0.92907	0.001456	0.001568	1.07635	686.613	637.912		5.36118	0.276667	0.0516055	0.186526	3.61446	19.3778
1078.79	7742	0			0.003428	0.028919	8.43606	291.712	34.5793	0.118539		0.774785	1.65744	2.13923	1.29068	0.60334	0.467459
1158.79	7742	0			0.010696	0.241042	22.5348	93.4892	4.14866	0.044376		2.11415	11.3541	5.37056	0.473004	0.0880735	0.1862
1238.79	7742	0			0.021211	1.1339	53.4576	47.1447	0.881908	0.018706		3.93375	40.3239	10.2508	0.25421	0.0247992	0.0975537
1318.79	7742	0			0.006421	0.07464	11.6249	155.746	13.3977	0.086023		1.31743	3.84584	2.91921	0.759056	0.260021	0.342559
1398.79	7742	0			0.000329	0.002218	6.73467	3035.69	450.755	0.148485		0.24291	0.417957	1.72063	4.11675	2.39259	0.581184
1478.79	7742	0			0.019147	0.414473	21.6466	52.2267	2.4127	0.046197		3.57217	18.4982	5.17843	0.279942	0.0540593	0.193109
1558.79	7742	0			0.038364	28.9051	753.436	26.0658	0.034596	0.001327		6.56209	112.065	17.0777	0.152391	0.00892338	0.058556
1638.79	7742	0			0.032638	9.92324	304.037	30.6389	0.100774	0.003289		5.36577	46.5215	8.67006	0.186366	0.0214954	0.11534
1718.79	7742	0			0.048574	13.44	276.691	20.5871	0.074405	0.003614		7.19068	58.6649	8.15845	0.139069	0.017046	0.122572
1798.79	7742	0			0.047069	10.6432	226.12	21.2455	0.093957	0.004422		6.79495	49.0075	7.21234	0.147168	0.020405	0.138651
1878.79	7742	0			0.92907	1.11506	1.20018	1.07635	0.896816	0.833205		5.36118	16.1073	3.00443	0.186526	0.0620837	0.332842
1958.79	7742	0			6.46109	7.7545	1.20018	0.154773	0.128957	0.833205		12.9918	39.033	3.00443	0.0769715	0.0256194	0.332842
2038.79	7742	0			0.092467	15.4957	167.581	10.8147	0.064534	0.005967		10.7505	65.7629	6.11718	0.0930187	0.0152061	0.163474
2118.79	7742	0			0.104668	43.0123	410.939	9.554	0.023249	0.002433		15.068	160.776	10.67	0.0663657	0.00621982	0.0937203
2198.79	7742	0			0.047175	2.34489	49.7062	21.1977	0.42646	0.020118		7.79396	61.8028	7.92957	0.128304	0.0161805	0.12611
2278.79	7742	0			0.01471	0.16109	10.9514	67.9829	6.2077	0.091313		2.80291	7.74753	2.7641	0.356772	0.129073	0.361781
2358.79	7742	0			0.046482	0.523623	11.2651	21.5138	1.90977	0.088769		8.36671	23.7051	2.83327	0.119521	0.0421849	0.352949
2438.79	7742	0			0.056813	1.02286	18.0041	17.6017	0.977648	0.055543		10.1113	44.476	4.39863	0.098899	0.022484	0.227343
2518.79	7742	0			0.03484	0.513954	14.7517	28.7023	1.9457	0.067789		6.31978	23.1478	3.66276	0.158233	0.0432006	0.273018
518.794	7662	0			0.057173	28.5955	500.154	17.4906	0.034971	0.001999		8.99546	110.996	12.3391	0.111167	0.00900933	0.0810431
598.794	7662	0			0.033679	21.2603	631.266	29.6922	0.047036	0.001584		5.7915	85.668	14.792	0.172667	0.011673	0.0676039
678.794	7662	0			0.02377	1.54318	64.9203	42.0692	0.648013	0.015404		4.34847	45.1103	10.3738	0.229966	0.0221679	0.0963965
758.794	7662	0			0.012754	0.874794	68.5882	78.4049	1.14313	0.01458		2.55928	29.1613	11.3943	0.390736	0.034292	0.0877628
838.794	7662	0			0.013965	0.457231	32.7401	71.6052	2.18708	0.030544		2.70115	19.6676	7.2812	0.370213	0.0508451	0.13734
918.794	7662	0			0.010133	0.278868	27.5211	98.6887	3.58592	0.036336		2.01923	12.9177	6.39734	0.495238	0.0774131	0.156315
998.794	7662	0			0.008699	0.099658	11.4559	114.952	10.0343	0.087291		1.76037	5.07664	2.88385	0.568063	0.196981	0.346759
1078.79	7662	0			0.00233	0.01375	5.9014	429.184	72.7258	0.169451		0.601961	0.911185	1.51369	1.66124	1.09747	0.660636
1158.79	7662	0			0.003078	0.025533	8.29623	324.918	39.1645	0.120537		0.709877	1.49365	2.1041	1.40869	0.669502	0.475264
1238.79	7662	0			0.021192	0.540029	25.4824	47.1871	1.85175	0.039243		3.9231	23.6316	6.0237	0.254901	0.0423163	0.166011
1318.79	7662	0			0.002715	0.020377	7.50411	368.269	49.0757	0.13326		0.655782	1.25269	1.91023	1.5249	0.798279	0.523498
1398.79	7662	0			0.002789	0.022648	8.11925	358.496	44.1539	0.123164		0.674595	1.39221	2.06376	1.48237	0.718285	0.484551
1478.79	7662	0			0.019565	1.21702	62.2025	51.1107	0.821682	0.016077		3.66024	41.3515	11.2975	0.273206	0.0241829	0.0885153
1558.79	7662	0			0.028026	1.71988	61.3679	35.6814	0.581435	0.016295		4.93691	41.2933	8.36419	0.202556	0.024217	0.119557
1638.79	7662	0			0.030772	12.1338	394.313	32.4971	0.082414	0.002536		5.22777	54.1545	10.359	0.191286	0.0184657	0.0965344
1718.79	7662	0			0.032617	14.4744	443.764	30.6585	0.069088	0.002253		5.51539	62.2365	11.2841	0.181311	0.0160678	0.0886199
1798.79	7662	0			0.004557	1.11506	244.691	219.442	0.896816	0.004087		2.13066	16.1073	7.55978	0.469339	0.0620837	0.132279
1878.79	7662	0			0.049049	8.55705	174.458	20.3877	0.116863	0.005732		6.69312	41.8042	6.24584	0.149407	0.0239211	0.160107
1958.79	7662	0			7.51863	1.23366	0.16408	0.133003	0.810599	6.09459		14.4505	29.4833	2.04029	0.0692016	0.0339175	0.490127
2038.79	7662	0			6.36264	7.63635	1.20018	0.157167	0.130953	0.833205		12.856	38.625	3.00443	0.0777845	0.02589	0.332842
2118.79	7662	0			0.072812	16.7592	230.171	13.734	0.059669	0.004345		9.62192	70.126	7.28814	0.103929	0.0142601	0.137209
2198.79	7662	0			0.022284	9.34265	419.261	44.876	0.107036	0.002385		4.11213	44.5168	10.8257	0.243183	0.0224634	0.0923725
2278.79	7662	0			0.007174	0.080913	11.2793	139.399	12.3589	0.088658		1.54429	4.39812	2.848	0.647549	0.22737	0.351124
2358.79	7662	0			0.014083	0.136602	9.69946	71.0053	7.32054	0.103099		2.67161	6.55598	2.45394	0.374306	0.152532	0.407508
2438.79	7662	0			0.019102	0.197572	10.3429	52.35	5.06144	0.096685		3.55297	9.27278	2.60987	0.281455	0.107843	0.383161
2518.79	7662	0			0.118011	3.727	31.5819	8.47382	0.268312	0.031664		20.3737	144.215	7.07848	0.0490828	0.00693408	0.141273
2598.79	7662	0			0.047982	0.939886	19.5882	20.841	1.06396	0.051051		8.56475	40.647	4.74585	0.116758	0.0246021	0.21071
438.794	7582	0			0.09791	34.6316	353.708	10.2134	0.028875	0.002827		13.7341	131.838	9.59933	0.0728114	0.00758505	0.104174
518.794	7582	0			0.04599	24.8036	539.322	21.7437	0.040317	0.001854		7.48956	97.9028	13.0719	0.133519	0.0102142	0.0765
598.794	7582	0			0.040367	1.78379	44.1894	24.7727	0.560604	0.02263		6.948	56.2278	8.09266	0.143926	0.0177848	0.123569
678.794	7582	0			0.030622	2.30938	75.4146	32.6558	0.433016	0.01326		5.44948	62.7751	11.5195	0.183504	0.0159299	0.0868096
758.794	7582	0			6.41002	0.646285	0.100824	0.156006	1.54731	9.91826		12.9214	21.3777	1.65445	0.0773911	0.0467777	0.604432
838.794	7582	0			0.013675	1.36234	99.6259	73.1285	0.734031	0.010038		2.68954	39.3446	14.6287	0.37181	0.0254164	0.0683586
918.794	7582	0			0.007712	7.99729	1036.96	129.665	0.125042	0.000964		1.7814	39.8713	22.3821	0.561358	0.0250807	0.0446786
998.794	7582	0			0.022091	1.80363	81.644	45.2665	0.554438	0.012248		4.08033	56.0315	13.7321	0.245078	0.0178471	0.072822
1078.79	7582	0			0.004344	0.034242	7.88209	230.185	29.2036	0.12687		1.02613	2.07673	2.02385	0.974537	0.481527	0.494108
1158.79	7582	0			0.000334	0.002012	6.02779	2996.48	497.111	0.165898		0.245944	0.379833	1.54439	4.06597	2.63274	0.647505
1238.79	7582	0			0.002554	0.015894	6.22268	391.512	62.9169	0.160702		0.63232	1.00671	1.59209	1.58148	0.993335	0.628105
1318.79	7582	0			0.002369	8.21673	3469.08	422.197	0.121703	0.000288		0.598512	40.629	67.8834	1.67081	0.0246129	0.0147311
1398.79	7582	0			0.005002	0.051128	10.2209	199.909	19.5587	0.097839		1.10162	2.84793	2.58521	0.90775	0.351132	0.386815
1478.79	7582	0			0.014839	14.3847	969.404	67.3915	0.069519	0.001032		2.93239	61.9266	21.1181	0.341018	0.0161481	0.0473527
1558.79	7582	0			0.028191	17.8704	633.904	35.4723	0.055958	0.001578		4.98354	73.9628	14.8414	0.20066	0.0135203	0.0673791
1638.79	7582	0			0.015655	8.86997	566.588	63.8771	0.11274	0.001765		3.15746	42.8847	13.582	0.31671	0.0233184	0.0736268
1718.79	7582	0			9.82103	11.787	1.20018	0.101822	0.084839	0.833205		17.6264	52.9572	3.00443	0.0567331	0.0188832	0.332842
1798.79	7582	0			0.039492	13.4968	341.761	25.3217	0.074092	0.002926		6.27793	58.8608	9.37583	0.159288	0.0169892	0.106657
1878.79	7582	0			0.041632	11.8601	284.881	24.0202	0.084317	0.00351		6.40175	53.2093	8.31168	0.156207	0.0187937	0.120313
1958.79	7582	0			0.067052	18.3994	274.402	14.9137	0.05435	0.003644		9.33866	75.7892	8.11564	0.107082	0.0131945	0.123219
2038.79	7582	0			0.070743	15.6699	221.503	14.1356	0.063817	0.004515		9.31304	66.3645	7.12598	0.107376	0.0150683	0.140332
2118.79	7582	0			0.92907	1.11506	1.20018	1.07635	0.896816	0.833205		5.36118	16.1073	3.00443	0.186526	0.0620837	0.332842
2198.79	7582	0			0.071683	20.1346	280.882	13.9502	0.049666	0.00356		9.92864	81.781	8.23688	0.100719	0.0122278	0.121405
2278.79	7582	0			0.018144	11.9572	659.012	55.1142	0.083632	0.001517		3.49711	53.5448	15.3111	0.28595	0.018676	0.0653119
2358.79	7582	0			0.008231	0.085598	10.3995	121.493	11.6825	0.096158		1.65607	4.35005	2.62673	0.603839	0.229883	0.380702
2438.79	7582	0			0.027096	0.551296	20.3461	36.9059	1.81391	0.049149		4.95003	24.3726	4.92371	0.202019	0.0410298	0.203099
2518.79	7582	0			0.050586	2.32593	45.9796	19.7683	0.429936	0.021749		8.93771	85.9159	9.61273	0.111885	0.0116393	0.104029
2598.79	7582	0			0.021811	0.365373	16.7514	45.8475	2.73693	0.059696		4.03009	16.6163	4.12307	0.248133	0.0601817	0.242538
438.794	7502	0			0.21403	87.3206	407.983	4.67224	0.011452	0.002451		29.56	313.771	10.6147	0.0338295	0.00318704	0.0942087
518.794	7502	0			0.0771	45.2472	586.863	12.9701	0.022101	0.001704		12.0686	168.494	13.9613	0.0828597	0.00593494	0.0716265
598.794	7502	0			0.021368	23.4198	1096.02	46.7991	0.042699	0.000912		3.96494	93.1244	23.487	0.252211	0.0107383	0.0425768
678.794	7502	0			0.017813	1.32208	74.2218	56.1401	0.756383	0.013473		3.37127	42.1598	12.5056	0.296624	0.0237193	0.0799641
758.794	7502	0			0.01502	0.560657	37.3283	66.5796	1.78362	0.026789		2.8601	23.7331	8.29799	0.349638	0.0421353	0.120511
838.794	7502	0			0.023375	1.70547	72.9625	42.7814	0.586348	0.013706		4.29848	57.7147	13.4268	0.232641	0.0173266	0.0744781
918.794	7502	0			0.019679	1.23689	62.8523	50.8147	0.808479	0.01591		3.67477	42.915	11.6783	0.272126	0.0233019	0.0856291
998.794	7502	0			0.015799	0.866163	54.8225	63.2936	1.15452	0.018241		3.02389	32.0352	10.594	0.3307	0.0312156	0.0943926
1078.79	7502	0			0.008908	0.107214	12.0359	112.261	9.32713	0.083085		1.83611	5.55355	3.02463	0.54463	0.180065	0.330619
1158.79	7502	0			0.000349	1.11506	3191.8	2862.46	0.896816	0.000313		0.256911	16.1073	62.696	3.8924	0.0620837	0.01595
1238.79	7502	0			0.000381	1.11506	2929.3	2627.04	0.896816	0.000341		0.278746	16.1073	57.7849	3.5875	0.0620837	0.0173056
1318.79	7502	0			0.002804	8.981	3203.48	356.695	0.111346	0.000312		0.687728	43.2681	62.9145	1.45406	0.0231117	0.0158946
1398.79	7502	0			0.005494	0.055722	10.1415	182	17.9461	0.098605		1.20196	3.0874	2.56863	0.831971	0.323897	0.389313
1478.79	7502	0			0.024499	2.30642	94.142	40.8174	0.433572	0.010622		4.47645	62.1994	13.8948	0.223391	0.0160773	0.0719695
1558.79	7502	0			0.024669	19.4818	789.735	40.5371	0.05133	0.001266		4.47868	79.5269	17.7568	0.22328	0.0125744	0.0563165
1638.79	7502	0			0.018431	7.56319	410.345	54.2555	0.132219	0.002437		3.60003	38.3724	10.6589	0.277776	0.0260604	0.093818
1718.79	7502	0			0.05483	23.9285	436.416	18.2384	0.041791	0.002291		8.51204	94.881	11.1467	0.117481	0.0105395	0.0897128
1798.79	7502	0			0.06824	35.7715	524.204	14.6542	0.027955	0.001908		10.6164	135.774	12.7891	0.0941935	0.00736516	0.0781918
1878.79	7502	0			0.032548	12.2118	375.19	30.7236	0.081888	0.002665		5.44171	54.4239	10.0012	0.183766	0.0183743	0.0999876
1958.79	7502	0			0.033683	10.6022	314.764	29.6885	0.09432	0.003177		5.50867	48.866	8.87074	0.181532	0.0204641	0.11273
2038.79	7502	0			0.038273	7.39661	193.261	26.1284	0.135197	0.005174		5.72892	37.7972	6.59761	0.174553	0.026457	0.15157
2118.79	7502	0			0.053047	10.4378	196.765	18.8513	0.095806	0.005082		7.24853	48.2982	6.66317	0.137959	0.0207047	0.150079
2198.79	7502	0			0.92907	1.11506	1.20018	1.07635	0.896816	0.833205		5.36118	16.1073	3.00443	0.186526	0.0620837	0.332842
2278.79	7502	0			0.042785	14.501	338.931	23.3729	0.068961	0.00295		6.68554	62.3285	9.32287	0.149577	0.016044	0.107263
2358.79	7502	0			0.01197	0.251698	21.0269	83.5402	3.97301	0.047558		2.37989	11.8401	4.97508	0.420188	0.0844585	0.201002
2438.79	7502	0			0.012264	0.167456	13.654	81.5376	5.97172	0.073239		2.35212	8.00627	3.40385	0.425148	0.124902	0.293785
2518.79	7502	0			0.021805	0.632332	28.999	45.8603	1.58145	0.034484		4.03153	26.5217	6.57855	0.248045	0.037705	0.152009
2598.79	7502	0			0.092472	86.0451	930.5	10.8141	0.011622	0.001075		15.1723	309.367	20.3903	0.0659097	0.00323241	0.049043
438.794	7422	0			0.175723	136.053	774.248	5.69077	0.00735	0.001292		27.5973	482.043	17.467	0.0362354	0.0020745	0.0572507
518.794	7422	0			0.019851	0.630271	31.7505	50.376	1.58662	0.031496		3.69288	26.7613	7.24675	0.270792	0.0373673	0.137993
598.794	7422	0			0.011509	0.1968	17.0993	86.8865	5.08131	0.058482		2.22853	9.36606	4.20279	0.448726	0.106769	0.237937
678.794	7422	0			0.012778	0.209305	16.3796	78.257	4.77771	0.061052		2.44013	9.86767	4.04392	0.409815	0.101341	0.247285
758.794	7422	0			0.00499	0.058302	11.6843	200.408	17.152	0.085585		1.0552	3.09453	2.93264	0.947685	0.323151	0.34099
838.794	7422	0			0.012415	0.212993	17.1564	80.5494	4.695	0.058287		2.37594	10.0363	4.22414	0.420887	0.0996385	0.236735
918.794	7422	0			0.011246	0.154858	13.7701	88.9212	6.45755	0.072621		2.18469	7.49351	3.43002	0.457732	0.133449	0.291544
998.794	7422	0			0.013217	0.860546	65.1078	75.6588	1.16205	0.015359		2.56005	32.2443	12.5952	0.390617	0.0310132	0.0793955
1078.79	7422	0			0.007387	0.087381	11.8295	135.379	11.4441	0.084534		1.56215	4.6476	2.97513	0.640144	0.215165	0.33612
1158.79	7422	0			0.002296	0.01409	6.1372	435.585	70.9746	0.162941		0.595908	0.937239	1.57279	1.67811	1.06696	0.635813
1238.79	7422	0			0.000367	1.11506	3035.08	2721.91	0.896816	0.000329		0.269515	16.1073	59.7639	3.71036	0.0620837	0.0167325
1318.79	7422	0			0.003725	0.026182	7.02874	268.455	38.194	0.142273		0.884937	1.59689	1.80452	1.13002	0.626217	0.554163
1398.79	7422	0			0.013157	1.83537	139.494	76.0036	0.54485	0.007169		2.60032	45.2558	17.404	0.384569	0.0220966	0.0574582
1478.79	7422	0			0.023463	30.2225	1288.1	42.6205	0.033088	0.000776		4.30621	116.614	27.0804	0.232223	0.00857529	0.036927
1558.79	7422	0			0.017767	13.5021	759.974	56.2854	0.074062	0.001316		3.42322	58.8793	17.2	0.292122	0.0169839	0.0581396
1638.79	7422	0			0.019288	10.1103	524.182	51.8462	0.098909	0.001908		3.68824	47.1676	12.7886	0.271132	0.021201	0.0781944
1718.79	7422	0			0.032275	15.4038	477.265	30.9836	0.064919	0.002095		5.4946	65.4456	11.9109	0.181997	0.0152799	0.0839566
1798.79	7422	0			0.019506	0.555114	28.4587	51.2664	1.80143	0.035139		3.64369	23.5012	6.44984	0.274447	0.042551	0.155043
1878.79	7422	0			0.024199	0.652914	26.9807	41.3235	1.5316	0.037064		4.43713	27.4646	6.18973	0.225371	0.0364105	0.161558
1958.79	7422	0			0.033583	24.1701	719.707	29.7768	0.041373	0.001389		5.81974	95.7152	16.4466	0.171829	0.0104477	0.0608027
2038.79	7422	0			0.044973	8.46819	188.294	22.2355	0.118089	0.005311		6.37961	41.4974	6.50469	0.156749	0.0240979	0.153735
2118.79	7422	0			0.076366	14.0446	183.911	13.0948	0.071202	0.005437		9.45906	60.7525	6.42268	0.105719	0.0164602	0.155698
2198.79	7422	0			0.92907	1.11506	1.20018	1.07635	0.896816	0.833205		5.36118	16.1073	3.00443	0.186526	0.0620837	0.332842
2278.79	7422	0			0.05892	1.7734	30.0985	16.9721	0.563888	0.033224		8.40963	42.5743	5.06256	0.118911	0.0234884	0.197528
2358.79	7422	0			7.17335	8.60934	1.20018	0.139405	0.116153	0.833205		13.9743	41.9847	3.00443	0.07156	0.0238182	0.332842
2438.79	7422	0			0.001058	0.042006	39.7207	945.594	23.8061	0.025176		0.70932	5.53202	7.79905	1.4098	0.180766	0.128221
2518.79	7422	0			0.012867	0.176195	13.6935	77.7179	5.67553	0.073027		2.51677	8.57231	3.40607	0.397335	0.116655	0.293593
2598.79	7422	0			0.023123	1.18376	51.1938	43.2469	0.844768	0.019534		4.25141	41.6008	9.78517	0.235216	0.024038	0.102195
2678.79	7422	0			0.018775	0.638936	34.0312	53.2624	1.5651	0.029385		3.52803	25.8838	7.33661	0.283444	0.0386342	0.136303
358.794	7342	0			0.013926	0.172758	12.4055	71.8084	5.78844	0.080609		2.64554	8.21998	3.10711	0.377995	0.121655	0.321842
438.794	7342	0			0.004285	0.040744	9.50897	233.384	24.5436	0.105164		0.954509	2.29885	2.40841	1.04766	0.435	0.415212
518.794	7342	0			0.008996	0.097028	10.7858	111.161	10.3063	0.092715		1.76669	4.7978	2.7157	0.566031	0.208429	0.368229
598.794	7342	0			0.006826	0.08332	12.2061	146.497	12.0019	0.081926		1.39561	4.26956	3.05929	0.716535	0.234216	0.326874
678.794	7342	0			0.015748	0.257027	16.3211	63.4997	3.89064	0.06127		2.97101	11.9524	4.02302	0.336586	0.0836651	0.24857
758.794	7342	0			0.006248	0.072505	11.6053	160.062	13.7921	0.086167		1.29938	3.78865	2.91574	0.769597	0.263946	0.342966
838.794	7342	0			0.005324	0.061534	11.5585	187.84	16.2513	0.086517		1.11516	3.23659	2.90235	0.896731	0.308968	0.344549
918.794	7342	0			0.009714	0.183267	18.8657	102.941	5.45652	0.053006		1.89078	8.74663	4.62594	0.528883	0.11433	0.216172
998.794	7342	0			0.003982	0.065755	16.5123	251.117	15.2079	0.060561		0.907095	3.6917	4.06981	1.10242	0.270878	0.245712
1078.79	7342	0			0.004334	0.044196	10.1966	230.715	22.6267	0.098072		0.95658	2.46283	2.57462	1.04539	0.406037	0.388406
1158.79	7342	0			0.92907	0.00101	0.001088	1.07635	989.612	919.419		5.36118	0.192896	0.03598	0.186526	5.18415	27.7932
1238.79	7342	0			0.92907	0.001074	0.001156	1.07635	931.256	865.203		5.36118	0.204841	0.0382081	0.186526	4.88184	26.1724
1318.79	7342	0			11.1974	0.085699	0.007653	0.089306	11.6688	130.66		19.5249	4.63345	0.23731	0.0512167	0.215822	4.2139
1398.79	7342	0			0.009246	13.3342	1442.18	108.156	0.074995	0.000693		1.94571	58.2995	29.9631	0.513951	0.0171528	0.0333744
1478.79	7342	0			0.0304	44.2266	1454.82	32.8946	0.022611	0.000687		5.46267	164.97	30.1994	0.183061	0.00606172	0.0331132
1558.79	7342	0			0.013596	8.68451	638.754	73.5509	0.115148	0.001566		2.82909	42.2443	14.9321	0.353471	0.0236718	0.0669697
1638.79	7342	0			0.018202	10.5388	578.988	54.9388	0.094888	0.001727		3.52157	48.647	13.814	0.283964	0.0205563	0.0723904
1718.79	7342	0			0.015565	12.4661	800.906	64.2467	0.080218	0.001249		3.07819	55.3019	17.9658	0.324867	0.0180826	0.0556615
1798.79	7342	0			0.002497	0.020387	8.16429	400.472	49.0517	0.122485		0.611195	1.26663	2.07238	1.63614	0.789498	0.482537
1878.79	7342	0			0.005657	0.066849	11.8174	176.778	14.9592	0.084621		1.18134	3.50317	2.96542	0.846498	0.285456	0.33722
1958.79	7342	0			0.043862	2.75358	62.7785	22.7989	0.363164	0.015929		7.47884	73.4238	9.81753	0.133711	0.0136196	0.101859
2038.79	7342	0			0.003333	1.11506	334.554	300.033	0.896816	0.002989		1.74303	16.1073	9.24099	0.573715	0.0620837	0.108214
2118.79	7342	0			0.92907	1.11506	1.20018	1.07635	0.896816	0.833205		5.36118	16.1073	3.00443	0.186526	0.0620837	0.332842
2198.79	7342	0			0.92907	1.11506	1.20018	1.07635	0.896816	0.833205		5.36118	16.1073	3.00443	0.186526	0.0620837	0.332842
2278.79	7342	0			0.92907	1.11506	1.20018	1.07635	0.896816	0.833205		5.36118	16.1073	3.00443	0.186526	0.0620837	0.332842
2358.79	7342	0			0.92907	1.11506	1.20018	1.07635	0.896816	0.833205		5.36118	16.1073	3.00443	0.186526	0.0620837	0.332842
2438.79	7342	0			0.036627	16.6869	455.588	27.3022	0.059927	0.002195		6.07334	69.876	11.5054	0.164654	0.0143111	0.086916
2518.79	7342	0			0.012102	0.379367	31.3485	82.6337	2.63597	0.031899		2.43708	16.5331	6.78397	0.410327	0.0604849	0.147406
2598.79	7342	0			0.023032	1.33477	57.9523	43.4176	0.749195	0.017256		4.22903	39.6585	9.37769	0.236461	0.0252153	0.106636
2678.79	7342	0			0.030229	24.0782	796.519	33.0805	0.041531	0.001255		5.33436	95.398	17.8837	0.187464	0.0104824	0.0559169
358.794	7262	0			0.045937	0.344115	7.49099	21.7689	2.90601	0.133494		8.24845	15.7957	1.91499	0.121235	0.0633084	0.522196
438.794	7262	0			0.014795	0.101669	6.87191	67.591	9.83585	0.14552		2.80103	4.92956	1.75991	0.357012	0.202858	0.56821
518.794	7262	0			0.007788	0.069562	8.93206	128.404	14.3757	0.111956		1.58982	3.61339	2.27283	0.629003	0.276748	0.439979
598.794	7262	0			0.01364	0.203511	14.9199	73.3125	4.91374	0.067025		2.59734	9.61226	3.70081	0.38501	0.104034	0.270211
678.794	7262	0			0.014742	1.15369	78.2583	67.8332	0.866786	0.012778		2.84876	38.002	13.3398	0.35103	0.0263144	0.0749634
758.794	7262	0			0.015595	1.17119	75.0996	64.1224	0.853831	0.013316		3.01694	36.7144	12.1694	0.331462	0.0272373	0.0821731
838.794	7262	0			0.005485	0.076304	13.9116	182.317	13.1054	0.071883		1.21688	4.2102	3.45984	0.821776	0.237519	0.289031
918.794	7262	0			0.92907	1.11506	1.20018	1.07635	0.896816	0.833205		5.36118	16.1073	3.00443	0.186526	0.0620837	0.332842
998.794	7262	0			0.004851	0.053004	10.9269	206.153	18.8666	0.091518		1.04375	2.87145	2.75109	0.958083	0.348256	0.363493
1078.79	7262	0			0.92907	0.00164	0.001765	1.07635	609.733	566.485		5.36118	0.310928	0.0579962	0.186526	3.21618	17.2425
1158.79	7262	0			0.004514	0.031358	6.94727	221.546	31.8896	0.143941		0.996961	1.77241	1.77781	1.00305	0.564203	0.562489
1238.79	7262	0			0.009632	0.155786	16.1743	103.824	6.41908	0.061827		1.9454	7.72497	3.9709	0.514034	0.12945	0.251832
1318.79	7262	0			9.40992	0.706108	0.075039	0.106271	1.41621	13.3264		17.0593	24.1525	1.41579	0.058619	0.0414036	0.706317
1398.79	7262	0			0.013329	1.52946	114.746	75.0241	0.653828	0.008715		2.64759	40.0245	15.1174	0.377702	0.0249847	0.0661491
1478.79	7262	0			0.017759	1.86906	105.243	56.308	0.535027	0.009502		3.40371	42.9861	12.6292	0.293797	0.0232633	0.0791816
1558.79	7262	0			0.013226	8.18944	619.199	75.6095	0.122108	0.001615		2.78278	40.5348	14.5663	0.359353	0.0246701	0.0686516
1638.79	7262	0			0.018968	11.6738	615.457	52.721	0.085662	0.001625		3.6262	52.5663	14.4963	0.275771	0.0190236	0.0689833
1718.79	7262	0			0.015182	1.51105	99.5269	65.8662	0.661793	0.010048		2.99934	37.0751	12.3611	0.333407	0.0269723	0.080899
1798.79	7262	0			0.000313	0.002192	6.99844	3192.28	456.141	0.142889		0.231506	0.413139	1.78458	4.31955	2.42049	0.560357
1878.79	7262	0			0.005643	0.07015	12.4318	177.216	14.2551	0.080439		1.17561	3.65946	3.11282	0.850621	0.273264	0.321252
1958.79	7262	0			0.03463	1.56413	45.1673	28.877	0.639334	0.02214		6.18919	57.1925	9.2407	0.161572	0.0174848	0.108217
2038.79	7262	0			0.003074	1.11506	362.784	325.351	0.896816	0.002756		1.64879	16.1073	9.76914	0.606504	0.0620837	0.102363
2118.79	7262	0			0.048998	17.2919	352.911	20.409	0.057831	0.002834		7.50856	71.9652	9.58442	0.133181	0.0138956	0.104336
2198.79	7262	0			5.88249	7.06007	1.20018	0.169996	0.141642	0.833205		12.1937	36.6352	3.00443	0.0820094	0.0272962	0.332842
2278.79	7262	0			0.0391	8.55428	218.781	25.5756	0.116901	0.004571		5.90732	41.7946	7.07505	0.169281	0.0239265	0.141342
2358.79	7262	0			7.30722	8.77001	1.20018	0.136851	0.114025	0.833205		14.1589	42.5395	3.00443	0.0706268	0.0235076	0.332842
2438.79	7262	0			6.79659	8.15716	1.20018	0.147133	0.122592	0.833205		13.4546	40.4233	3.00443	0.0743241	0.0247382	0.332842
2518.79	7262	0			0.032855	1.6252	49.4656	30.4366	0.615308	0.020216		5.6526	43.7624	7.74201	0.17691	0.0228506	0.129165
2598.79	7262	0			0.026419	20.581	779.029	37.8519	0.048589	0.001284		4.74596	83.3223	17.5565	0.210706	0.0120016	0.0569591
2678.79	7262	0			0.018383	10.1138	550.179	54.3988	0.098875	0.001818		3.55401	47.1796	13.275	0.281372	0.0211956	0.0753294
358.794	7182	0			0.029573	0.391147	13.2263	33.8141	2.55658	0.075607		5.39588	17.8205	3.30262	0.185326	0.056115	0.30279
438.794	7182	0			0.022559	0.297243	13.1764	44.3285	3.36425	0.075894		4.16047	13.6873	3.28985	0.240357	0.0730603	0.303965
518.794	7182	0			0.011762	0.129829	11.0382	85.021	7.70244	0.090595		2.30966	6.43992	2.78825	0.432964	0.155281	0.358647
598.794	7182	0			0.016113	0.250203	15.5282	62.0623	3.99675	0.064399		3.02512	11.6364	3.8466	0.330565	0.0859371	0.25997
678.794	7182	0			0.021646	0.777666	35.9262	46.1974	1.2859	0.027835		4.00381	31.7039	7.91843	0.249762	0.0315419	0.126288
758.794	7182	0			0.021335	2.05808	96.464	46.8709	0.48589	0.010367		3.95908	53.0102	13.3895	0.252584	0.0188643	0.0746854
838.794	7182	0			0.013156	16.9626	1289.35	76.0112	0.058953	0.000776		2.61322	70.8281	27.1038	0.38267	0.0141187	0.0368953
918.794	7182	0			0.010282	0.487428	47.4061	97.2576	2.05159	0.021094		2.08883	20.1064	9.62566	0.478736	0.0497354	0.103889
998.794	7182	0			0.009465	0.467845	49.4263	105.647	2.13746	0.020232		1.94883	19.389	9.94908	0.513129	0.0515755	0.100512
1078.79	7182	0			0.011065	0.442598	39.999	90.3733	2.25939	0.025001		2.22227	18.7846	8.4529	0.449991	0.053235	0.118303
1158.79	7182	0			0.010739	1.01373	94.3939	93.1154	0.986455	0.010594		2.17987	32.4067	14.8663	0.458743	0.0308578	0.0672661
1238.79	7182	0			0.012157	13.7949	1134.73	82.2574	0.072491	0.000881		2.47366	59.8902	24.2112	0.404259	0.0166972	0.0413033
1318.79	7182	0			9.43382	11.3223	1.20018	0.106002	0.088321	0.833205		17.0923	51.3525	3.00443	0.058506	0.0194732	0.332842
1398.79	7182	0			0.023455	1.8562	79.1391	42.635	0.538735	0.012636		4.30423	53.8422	12.5091	0.23233	0.0185728	0.0799415
1478.79	7182	0			0.016003	13.528	845.318	62.4865	0.073921	0.001183		3.13719	58.9687	18.7967	0.318756	0.0169581	0.053201
1558.79	7182	0			0.048384	3.2112	66.3698	20.6682	0.31141	0.015067		8.32011	90.5347	10.8814	0.120191	0.0110455	0.0918996
1638.79	7182	0			0.022256	19.6094	881.082	44.9315	0.050996	0.001135		4.10812	79.9676	19.4657	0.24342	0.0125051	0.0513723
1718.79	7182	0			0.009357	0.165284	17.6638	106.869	6.0502	0.056613		1.95051	8.32448	4.26784	0.512686	0.120128	0.23431
1798.79	7182	0			0.003253	0.023075	7.0934	307.4	43.3361	0.140976		0.758071	1.37205	1.80992	1.31914	0.728839	0.552511
1878.79	7182	0			0.003007	0.028242	9.39171	332.538	35.4076	0.106477		0.699873	1.66164	2.37419	1.42883	0.601817	0.421195
1958.79	7182	0			0.044926	65.9312	1467.56	22.2589	0.015167	0.000681		7.88212	239.914	30.4378	0.126869	0.00416815	0.0328539
2038.79	7182	0			0.024381	17.2074	705.764	41.0152	0.058115	0.001417		4.42817	71.6734	16.1858	0.225827	0.0139522	0.0617826
2118.79	7182	0			0.036197	19.4445	537.189	27.6268	0.051428	0.001862		6.09254	79.398	13.032	0.164135	0.0125948	0.0767342
2198.79	7182	0			0.048194	18.2907	379.519	20.7493	0.054673	0.002635		7.4799	75.414	10.0822	0.133692	0.0132601	0.0991845
2278.79	7182	0			0.063723	13.3897	210.123	15.6928	0.074684	0.004759		8.46096	58.4912	6.91307	0.11819	0.0170966	0.144654
2358.79	7182	0			0.006637	1.11506	167.999	150.664	0.896816	0.005952		2.62977	16.1073	6.12499	0.380262	0.0620837	0.163266
2438.79	7182	0			0.058213	13.5758	233.211	17.1784	0.07366	0.004288		8.05088	59.1338	7.34502	0.12421	0.0169108	0.136147
2518.79	7182	0			0.002885	1.11506	386.507	346.625	0.896816	0.002587		1.57714	16.1073	10.213	0.634058	0.0620837	0.0979149
2598.79	7182	0			0.05294	24.3361	459.696	18.8895	0.041091	0.002175		8.31347	96.2884	11.5822	0.120287	0.0103855	0.0863393
2678.79	7182	0			0.016426	8.5024	517.621	60.8794	0.117614	0.001932		3.28563	41.6155	12.6659	0.304356	0.0240295	0.0789521
2758.79	7182	0			0.02745	0.635832	23.1636	36.4303	1.57274	0.043171		4.9818	26.9518	5.41005	0.200731	0.0371032	0.184841
358.794	7102	0			0.059622	2.46144	41.2844	16.7725	0.406267	0.024222		10.6076	97.1729	9.16073	0.0942724	0.0102909	0.109162
438.794	7102	0			0.104583	164.256	1570.57	9.56176	0.006088	0.000637		17.9027	579.425	32.3651	0.0558574	0.00172585	0.0308974
518.794	7102	0			0.016033	0.322294	20.1025	62.373	3.10276	0.049745		3.03886	14.7023	4.8381	0.329071	0.0680166	0.206693
598.794	7102	0			0.006896	0.080402	11.6592	145.011	12.4376	0.08577		1.41985	4.15918	2.92931	0.704302	0.240432	0.341377
678.794	7102	0			0.015484	1.21122	78.2244	64.5831	0.825614	0.012784		2.97647	39.3275	13.2128	0.335968	0.0254275	0.0756843
758.794	7102	0			0.030118	2.28718	75.9404	33.2026	0.437219	0.013168		5.40019	66.7726	12.3649	0.185179	0.0149762	0.0808744
838.794	7102	0			0.023892	2.31732	96.9921	41.8554	0.431534	0.01031		4.37906	63.7366	14.5549	0.22836	0.0156896	0.0687055
918.794	7102	0			0.015615	0.963386	61.6975	64.0423	1.03801	0.016208		3.02124	32.6043	10.7917	0.330989	0.0306708	0.0926639
998.794	7102	0			0.02232	1.17795	52.7749	44.8023	0.848932	0.018948		4.11866	41.6631	10.1157	0.242798	0.0240021	0.0988564
1078.79	7102	0			0.019728	1.83109	92.8162	50.689	0.546122	0.010774		3.68531	54.0037	14.6538	0.271348	0.0185172	0.0682417
1158.79	7102	0			0.010846	11.1919	1031.91	92.2013	0.08935	0.000969		2.28389	50.9023	22.2875	0.437849	0.0196455	0.0448681
1238.79	7102	0			0.021577	25.4733	1180.59	46.3464	0.039257	0.000847		3.99755	100.215	25.0692	0.250153	0.00997853	0.0398896
1318.79	7102	0			0.92907	1.11506	1.20018	1.07635	0.896816	0.833205		5.36118	16.1073	3.00443	0.186526	0.0620837	0.332842
1398.79	7102	0			6.96394	8.35802	1.20018	0.143597	0.119646	0.833205		13.6854	41.1169	3.00443	0.0730704	0.0243209	0.332842
1478.79	7102	0			0.015464	0.661631	42.7843	64.665	1.51142	0.023373		2.95505	26.6467	9.01733	0.338403	0.0375281	0.110898
1558.79	7102	0			0.010135	0.159005	15.6886	98.6672	6.28911	0.063741		2.01068	7.78064	3.86966	0.497345	0.128524	0.258421
[truncated: 23,456 more rows]
