# Supplementary material for: Untargeted pixel-by-pixel metabolite ratio imaging as a novel tool for biomedical discovery in mass spectrometry imaging
Source: eLife. 2025 Mar 18;13:RP96892. doi: 10.7554/eLife.96892 (PMC11919253; doi:10.7554/eLife.96892)
Supplement: Figure 2—source data 1. [file elife-96892-fig2-data1.xlsx]

## Sheet: Figure 2 source data
spotId	raster	x	y	z	Date	LPE 20:4	LPE 22:4	LPE 22:6	LPE 18::1/LPE 22:6	LPE 20:4 /LPE 22:6	LPE 22:4/LPE 22:6	Arachidonic Acid_C20H32O2 /Docosahexaenoic Acid_C22H32O2
0	0	3688	16226			1.97609e+06	735407	4499333	0.0793797	0.439196	0.163448	0.410682
1	0	3768	16226			2.24552e+06	806803	4.40113e+06	0.0828538	0.510214	0.183317	0.388309
2	0	3848	16226			2.17223e+06	842745	4.07156e+06	0.132996	0.533512	0.206983	0.614986
3	0	3928	16226			1.8804e+06	798893	4309026	0.110374	0.436386	0.1854	0.501808
4	0	4008	16226			2.33682e+06	863187	4357266	0.128475	0.536305	0.198103	0.610476
5	0	4088	16226			2.29622e+06	950894	4.80741e+06	0.151224	0.477641	0.197798	0.464411
6	0	4168	16226			1.76098e+06	729276	4.53666e+06	0.118049	0.388166	0.160752	0.390323
7	0	4248	16226			1.51871e+06	677902	4294703	0.118729	0.353624	0.157846	0.569465
8	0	4328	16226			1.44601e+06	696844	4.36756e+06	0.140699	0.331079	0.15955	0.386159
9	0	4408	16226			1.24731e+06	565074	3657424	0.184981	0.341036	0.154501	0.383495
10	0	4488	16226			1.11657e+06	538376	3172236	0.209373	0.351983	0.169715	0.522257
11	0	4568	16226			869925	374625	1.97291e+06	0.348863	0.440934	0.189884	0.449027
12	0	4648	16226			338975	160701	759264	0.395423	0.446452	0.211653	0.67298
13	0	4728	16226			274106	66248.2	384937	0.369849	0.71208	0.172101	0.0438473
14	0	4808	16226			104190	2415.52	155965	0.678833	0.668033	0.0154876	0.95178
15	0	4888	16226			2131.24	2415.52	2228.3	0.822546	0.956444	1.08402	0.95178
16	0	4968	16226			2131.24	2415.52	2228.3	0.822546	0.956444	1.08402	0.95178
17	0	5048	16226			2131.24	2415.52	2228.3	0.822546	0.956444	1.08402	0.95178
18	0	5128	16226			2131.24	2415.52	174769	0.0104875	0.0121947	0.0138212	0.95178
19	0	5208	16226			2131.24	2415.52	2228.3	0.822546	0.956444	1.08402	0.95178
20	0	5288	16226			2131.24	2415.52	2228.3	0.822546	0.956444	1.08402	0.95178
21	0	5368	16226			2131.24	2415.52	2228.3	0.822546	0.956444	1.08402	0.95178
22	0	5448	16226			2131.24	2415.52	2228.3	0.822546	0.956444	1.08402	0.95178
23	0	5528	16226			2131.24	2415.52	2228.3	0.822546	0.956444	1.08402	0.95178
24	0	5608	16226			2131.24	2415.52	2228.3	0.822546	0.956444	1.08402	0.95178
25	0	5688	16226			2131.24	2415.52	2228.3	0.822546	0.956444	1.08402	0.95178
26	0	5768	16226			2131.24	2415.52	2228.3	0.822546	0.956444	1.08402	0.95178
27	0	5848	16226			2131.24	2415.52	2228.3	0.822546	0.956444	1.08402	0.95178
28	0	3208	16146			1.65716e+06	702118	4483997	0.0970997	0.369572	0.156583	0.444046
29	0	3288	16146			1.7449e+06	682464	4.85277e+06	0.102037	0.359568	0.140634	0.574574
30	0	3368	16146			1.80972e+06	655780	4.28028e+06	0.11213	0.422805	0.153209	0.454516
31	0	3448	16146			1.61283e+06	481951	4.22056e+06	0.0971744	0.382136	0.114191	0.445556
32	0	3528	16146			1.7071e+06	631226	4.40953e+06	0.109348	0.387139	0.14315	0.446354
33	0	3608	16146			2.06667e+06	793691	4.76486e+06	0.105104	0.433731	0.166572	0.454497
34	0	3688	16146			1.6477e+06	627470	4.03069e+06	0.109665	0.408789	0.155673	0.54425
35	0	3768	16146			1912725	641420	4.27286e+06	0.114566	0.447646	0.150115	0.51466
36	0	3848	16146			2.14797e+06	647881	4.68978e+06	0.114858	0.45801	0.138147	0.448169
37	0	3928	16146			2.07881e+06	682168	4299512	0.14215	0.483499	0.158662	0.653769
38	0	4008	16146			2.23775e+06	944554	4.54232e+06	0.182245	0.492645	0.207946	0.472818
39	0	4088	16146			2.33505e+06	850624	5380942	0.131132	0.433948	0.158081	0.498487
40	0	4168	16146			2.02977e+06	815188	5177071	0.17998	0.39207	0.157461	0.495005
41	0	4248	16146			1.86155e+06	773562	4.97803e+06	0.166361	0.373952	0.155395	0.477275
42	0	4328	16146			1.78237e+06	737541	5194898	0.166646	0.3431	0.141974	0.283634
43	0	4408	16146			1.51222e+06	700992	4.62926e+06	0.199866	0.326666	0.151427	0.431793
44	0	4488	16146			1400810	473289	4589202	0.184639	0.30524	0.103131	0.435828
45	0	4568	16146			1.45986e+06	637212	4.41698e+06	0.149755	0.330511	0.144264	0.435853
46	0	4648	16146			1.45192e+06	529439	4646789	0.14989	0.312457	0.113937	0.305608
47	0	4728	16146			1.88778e+06	783377	4696283	0.236203	0.401974	0.166808	0.410726
48	0	4808	16146			951517	236143	1.56794e+06	0.293028	0.606859	0.150608	0.491999
49	0	4888	16146			694739	227467	1.81982e+06	0.305017	0.381762	0.124994	0.444347
50	0	4968	16146			454003	142579	1.03764e+06	0.283629	0.437534	0.137407	0.548451
51	0	5048	16146			1.30363e+06	529187	3904572	0.20027	0.333872	0.13553	0.417643
52	0	5128	16146			1490943	664378	4671911	0.163995	0.319129	0.142207	0.442309
53	0	5208	16146			1.65286e+06	701626	4499136	0.19153	0.367372	0.155947	0.315524
54	0	5288	16146			1.30519e+06	558324	3.30868e+06	0.199707	0.394476	0.168745	0.523893
55	0	5368	16146			1.16595e+06	572780	3.32766e+06	0.189839	0.350381	0.172127	0.601136
56	0	5448	16146			1.5832e+06	716640	3779215	0.191347	0.418922	0.189627	0.547036
57	0	5528	16146			1956904	707192	3.93191e+06	0.204731	0.497698	0.17986	0.458398
58	0	5608	16146			1.74433e+06	648945	4.18793e+06	0.194644	0.416515	0.154956	0.580235
59	0	5688	16146			1745988	847725	3.8733e+06	0.170881	0.450775	0.218864	0.692834
60	0	5768	16146			1.95821e+06	896496	4.32689e+06	0.132902	0.452566	0.207192	0.556085
61	0	5848	16146			1.36938e+06	554647	3185649	0.116797	0.429859	0.174108	0.524168
62	0	5928	16146			1.06944e+06	515175	2415272	0.120034	0.442782	0.213299	0.564199
63	0	6008	16146			816878	312090	1.58714e+06	0.119754	0.514687	0.196637	0.80067
64	0	6088	16146			296346	118122	682756	0.272208	0.434043	0.173007	0.365606
65	0	6168	16146			2131.24	2415.52	2228.3	0.822546	0.956444	1.08402	0.95178
66	0	6248	16146			2131.24	2415.52	2228.3	0.822546	0.956444	1.08402	0.95178
67	0	6328	16146			2131.24	2415.52	2228.3	0.822546	0.956444	1.08402	0.95178
68	0	6408	16146			2131.24	2415.52	2228.3	0.822546	0.956444	1.08402	0.95178
69	0	2728	16066			1.00829e+06	212349	2718351	0.0920099	0.370921	0.0781169	0.548593
70	0	2808	16066			1.27571e+06	355727	3.43349e+06	0.102306	0.37155	0.103605	0.461796
71	0	2888	16066			1782131	490029	4877994	0.0990781	0.365341	0.100457	0.284372
72	0	2968	16066			1.66682e+06	434692	4.05341e+06	0.0939068	0.411215	0.107241	0.40753
73	0	3048	16066			1.83231e+06	456822	4.74963e+06	0.135964	0.385779	0.0961805	0.417473
74	0	3128	16066			1.59415e+06	515196	4708140	0.104008	0.338594	0.109427	0.420304
75	0	3208	16066			1.43382e+06	593247	4.09108e+06	0.123104	0.350476	0.14501	0.394472
76	0	3288	16066			1.31588e+06	518308	4294944	0.138784	0.306379	0.120679	0.465879
77	0	3368	16066			1605559	598925	4.40663e+06	0.103021	0.364351	0.135914	0.405994
78	0	3448	16066			2.00915e+06	666895	4939226	0.144281	0.406775	0.13502	0.520803
79	0	3528	16066			2.34367e+06	776007	5.31888e+06	0.130974	0.440633	0.145897	0.405824
80	0	3608	16066			2.08753e+06	796195	5391572	0.154492	0.387183	0.147674	0.386956
81	0	3688	16066			1.92608e+06	664517	4.73109e+06	0.151456	0.40711	0.140457	0.59404
82	0	3768	16066			2.30053e+06	872202	5.57741e+06	0.145313	0.412473	0.156381	0.621269
83	0	3848	16066			2.43077e+06	855283	5.14626e+06	0.152254	0.472338	0.166195	0.626466
84	0	3928	16066			2171245	797570	4.58271e+06	0.180483	0.47379	0.174039	0.501126
85	0	4008	16066			2.751e+06	915142	5552490	0.181852	0.495453	0.164816	0.657356
86	0	4088	16066			2130731	661657	4.78898e+06	0.210855	0.444924	0.138162	0.581365
87	0	4168	16066			2.27501e+06	851139	5140219	0.236362	0.442589	0.165584	0.527305
88	0	4248	16066			2.02642e+06	888925	5083738	0.282665	0.398609	0.174857	0.381651
89	0	4328	16066			1.63804e+06	680210	4.88934e+06	0.253012	0.335022	0.139121	0.304779
90	0	4408	16066			1.89782e+06	669988	5.12026e+06	0.247564	0.370649	0.13085	0.382
91	0	4488	16066			1.85409e+06	711050	4917796	0.204527	0.377017	0.144587	0.303647
92	0	4568	16066			1.4972e+06	574691	5199629	0.193724	0.287944	0.110525	0.248099
93	0	4648	16066			1.67555e+06	549520	5.82104e+06	0.183133	0.287844	0.0944024	0.350512
94	0	4728	16066			1.65671e+06	682589	4954269	0.177357	0.3344	0.137778	0.418181
95	0	4808	16066			1.9841e+06	899922	5273231	0.300223	0.376258	0.170659	0.600105
96	0	4888	16066			1.8655e+06	827213	5.69121e+06	0.213751	0.327785	0.145349	0.459395
97	0	4968	16066			1.616e+06	649510	4626926	0.196794	0.349259	0.140376	0.332835
98	0	5048	16066			1.6206e+06	644497	5.13445e+06	0.191366	0.315633	0.125524	0.280681
99	0	5128	16066			1.74711e+06	659602	5441105	0.177292	0.321094	0.121226	0.331055
100	0	5208	16066			1.5211e+06	662784	5393849	0.188375	0.282007	0.122878	0.34018
101	0	5288	16066			1.72867e+06	732040	5865959	0.173863	0.294695	0.124795	0.343538
102	0	5368	16066			1.77848e+06	614288	4.95011e+06	0.233919	0.35928	0.124096	0.408606
103	0	5448	16066			1.91184e+06	889807	5.64312e+06	0.171397	0.338791	0.15768	0.524437
104	0	5528	16066			2.3795e+06	878680	5.25542e+06	0.188751	0.452771	0.167195	0.507373
105	0	5608	16066			2.56057e+06	840497	5.21532e+06	0.202236	0.49097	0.161159	0.442476
106	0	5688	16066			2.22012e+06	877045	4822382	0.130707	0.460379	0.18187	0.588268
107	0	5768	16066			2.19801e+06	860764	4.29786e+06	0.118368	0.51142	0.200278	0.48784
108	0	5848	16066			2.30145e+06	898099	5.13633e+06	0.119214	0.448073	0.174852	0.444438
109	0	5928	16066			1.98913e+06	746613	4.20738e+06	0.109093	0.472772	0.177453	0.511523
110	0	6008	16066			1.95522e+06	653076	4424465	0.123448	0.44191	0.147606	0.425253
111	0	6088	16066			631001	251424	1.58011e+06	0.155432	0.39934	0.159118	0.487249
112	0	6168	16066			536066	154779	1.13698e+06	0.146296	0.471482	0.136131	0.528943
113	0	6248	16066			885700	347822	2486653	0.125433	0.356182	0.139876	0.412456
114	0	6328	16066			940072	337931	2.45618e+06	0.108932	0.382737	0.137584	0.462248
115	0	6408	16066			635477	207287	1.62589e+06	0.0817733	0.390849	0.127491	0.578964
116	0	6488	16066			277717	134134	735770	0.159082	0.37745	0.182304	0.412061
117	0	6568	16066			169206	37249.4	445434	0.0861133	0.379868	0.083625	0.238763
118	0	6648	16066			121948	48593.4	273194	0.00670907	0.44638	0.177871	0.569119
119	0	6728	16066			70873.7	2415.52	242118	0.00757019	0.292724	0.00997662	0.016888
120	0	6808	16066			45023.8	2415.52	131381	0.330336	0.342697	0.0183856	0.95178
121	0	6888	16066			2131.24	2415.52	2228.3	0.822546	0.956444	1.08402	0.95178
122	0	6968	16066			2131.24	2415.52	79379.7	0.02309	0.0268487	0.03043	0.95178
123	0	2248	15986			676811	227771	1.84709e+06	0.126636	0.36642	0.123313	0.348606
124	0	2328	15986			1.59829e+06	593161	4579203	0.098923	0.349033	0.129534	0.439574
125	0	2408	15986			1.15063e+06	423674	3.46613e+06	0.094747	0.331963	0.122233	0.324608
126	0	2488	15986			1.14695e+06	401270	3281071	0.10139	0.349565	0.122299	0.495716
127	0	2568	15986			1.46732e+06	570270	4935170	0.115085	0.29732	0.115552	0.44009
128	0	2648	15986			1388743	351657	4.40833e+06	0.120422	0.315027	0.0797711	0.393562
129	0	2728	15986			1.12142e+06	389536	3.85721e+06	0.159553	0.290734	0.100989	0.479257
130	0	2808	15986			1.40126e+06	454223	4692450	0.0957283	0.298621	0.0967987	0.386639
131	0	2888	15986			1.30117e+06	362771	3.26616e+06	0.175985	0.39838	0.11107	0.461416
132	0	2968	15986			1334029	395750	3.35961e+06	0.177107	0.397079	0.117796	0.414672
133	0	3048	15986			2003548	619487	5.13536e+06	0.189535	0.390148	0.120632	0.489918
134	0	3128	15986			1.82733e+06	641633	4854246	0.173525	0.37644	0.13218	0.35082
135	0	3208	15986			1927968	577514	6.37026e+06	0.148408	0.302651	0.0906579	0.43572
136	0	3288	15986			1.58982e+06	540022	5.48835e+06	0.147758	0.289672	0.0983944	0.435055
137	0	3368	15986			1.80685e+06	477943	4.91679e+06	0.173087	0.367485	0.0972061	0.612602
138	0	3448	15986			2.29623e+06	646809	5.97412e+06	0.141638	0.384364	0.108269	0.332951
139	0	3528	15986			2.35373e+06	939089	5984034	0.156597	0.393336	0.156932	0.430218
140	0	3608	15986			2.17008e+06	842634	5.31805e+06	0.154454	0.408059	0.158448	0.434911
141	0	3688	15986			2.30467e+06	1.0819e+06	5797588	0.158786	0.397522	0.186613	0.526431
142	0	3768	15986			2.51633e+06	813715	5084658	0.215227	0.494887	0.160033	0.450623
143	0	3848	15986			2154737	838504	5123455	0.222926	0.420563	0.16366	0.59561
144	0	3928	15986			2308098	790049	4.56313e+06	0.213132	0.505815	0.173138	0.518183
145	0	4008	15986			2.15963e+06	892287	5165088	0.187396	0.41812	0.172753	0.744386
146	0	4088	15986			2.22613e+06	771432	5.59569e+06	0.234049	0.397828	0.137862	0.61884
147	0	4168	15986			1967143	807196	5.12893e+06	0.294283	0.383539	0.157381	0.510594
148	0	4248	15986			1.64774e+06	851174	5320022	0.300849	0.309724	0.159994	0.325578
149	0	4328	15986			1.93541e+06	1.11088e+06	4820253	0.340194	0.401515	0.23046	0.340288
150	0	4408	15986			1.93639e+06	859459	5.63626e+06	0.327047	0.343559	0.152487	0.330495
151	0	4488	15986			1.68518e+06	820287	5.18774e+06	0.389138	0.324838	0.15812	0.588409
152	0	4568	15986			1.9154e+06	701822	5.39687e+06	0.245653	0.35491	0.130042	0.371694
153	0	4648	15986			1.66636e+06	630917	5330441	0.233019	0.312612	0.118361	0.313659
154	0	4728	15986			1.72127e+06	720995	5.57953e+06	0.232897	0.308497	0.129221	0.41969
155	0	4808	15986			2.34714e+06	822983	5.68184e+06	0.290127	0.413094	0.144844	0.41792
156	0	4888	15986			2.01141e+06	1.08982e+06	5960725	0.286529	0.337443	0.182833	0.570902
157	0	4968	15986			1.58476e+06	735930	5.40033e+06	0.179081	0.293457	0.136275	0.386784
158	0	5048	15986			1.75373e+06	715869	6453960	0.20475	0.271729	0.110919	0.399637
159	0	5128	15986			1.68408e+06	755165	5864119	0.254049	0.287183	0.128777	0.35056
160	0	5208	15986			2.77428e+06	1.12151e+06	6820717	0.24826	0.406743	0.164426	0.536929
161	0	5288	15986			2148453	880594	5735992	0.217781	0.374556	0.153521	0.296095
162	0	5368	15986			2.0995e+06	656273	4.94306e+06	0.249142	0.424736	0.132767	0.558355
163	0	5448	15986			2.12004e+06	922572	5.62642e+06	0.272552	0.376802	0.163972	0.561901
164	0	5528	15986			2.26068e+06	822307	5.98046e+06	0.252818	0.378011	0.137499	0.468657
165	0	5608	15986			2.2555e+06	927144	5.49453e+06	0.166242	0.410499	0.168739	0.598375
166	0	5688	15986			2.16498e+06	899291	5038514	0.176986	0.429687	0.178483	0.515284
167	0	5768	15986			2.40749e+06	803706	5391434	0.164018	0.446541	0.149071	0.63319
168	0	5848	15986			2244627	755859	4.71475e+06	0.186517	0.476086	0.160318	0.469762
169	0	5928	15986			2.41146e+06	845688	5.03596e+06	0.134938	0.478847	0.16793	0.599513
170	0	6008	15986			2.36213e+06	843173	5.52616e+06	0.116719	0.427444	0.152578	0.590958
171	0	6088	15986			1.703e+06	566327	3.85669e+06	0.219763	0.44157	0.146843	0.407574
172	0	6168	15986			1.55908e+06	572470	3.77118e+06	0.130493	0.41342	0.151801	0.446424
173	0	6248	15986			1.98943e+06	608113	5070945	0.134864	0.39232	0.119921	0.363722
174	0	6328	15986			1.84518e+06	595078	4.62686e+06	0.102784	0.398798	0.128614	0.37695
175	0	6408	15986			2.06834e+06	629118	5.06331e+06	0.0995378	0.408495	0.12425	0.504677
176	0	6488	15986			1.80075e+06	774164	5.56694e+06	0.101081	0.323473	0.139065	0.551558
177	0	6568	15986			1.82914e+06	693185	4.8477e+06	0.0869838	0.377322	0.142992	0.545374
178	0	6648	15986			2.02375e+06	683200	4490021	0.0988307	0.450722	0.15216	0.474428
179	0	6728	15986			1.89132e+06	766422	4911725	0.0747706	0.385063	0.156039	0.531611
180	0	6808	15986			1.53615e+06	589127	3.78266e+06	0.0666153	0.406104	0.155744	0.537059
181	0	6888	15986			1.04914e+06	394323	2.64501e+06	0.081935	0.396649	0.149082	0.534037
182	0	6968	15986			785862	312857	2139167	0.0985285	0.367368	0.146252	0.593891
183	0	7048	15986			311906	153541	950002	0.0889715	0.328321	0.161621	0.455647
184	0	7128	15986			77777.8	2415.52	197705	0.348516	0.393403	0.0122178	0.95178
185	0	7208	15986			2131.24	2415.52	2228.3	0.822546	0.956444	1.08402	0.95178
186	0	1848	15906			2131.24	2415.52	2228.3	0.822546	0.956444	1.08402	0.95178
187	0	1928	15906			355122	120471	964854	0.0890668	0.368057	0.124859	0.426044
188	0	2008	15906			958338	375557	2964427	0.0918105	0.323279	0.126688	0.580922
189	0	2088	15906			503403	148622	1.3243e+06	0.158921	0.380129	0.112228	0.00433312
190	0	2168	15906			1.18235e+06	482916	3.75617e+06	0.0969799	0.314775	0.128566	0.399137
191	0	2248	15906			1665128	545228	5198550	0.137887	0.320306	0.104881	0.362586
192	0	2328	15906			2.01481e+06	586398	5.57832e+06	0.108461	0.361185	0.105121	0.448119
193	0	2408	15906			1371910	414114	4.38505e+06	0.103191	0.312861	0.0944378	0.495018
194	0	2488	15906			1.41526e+06	458007	4.5478e+06	0.147056	0.311196	0.10071	0.313434
195	0	2568	15906			1.28115e+06	341949	3.72474e+06	0.12081	0.343957	0.0918048	0.241838
196	0	2648	15906			803732	256109	2.31211e+06	0.164445	0.347619	0.110769	0.336294
197	0	2728	15906			555064	207124	1.43675e+06	0.189099	0.386334	0.144162	0.522175
198	0	2808	15906			1536698	478640	4.32892e+06	0.195091	0.354984	0.110568	0.41844
199	0	2888	15906			1561196	517426	3.99723e+06	0.214434	0.39057	0.129446	0.39109
200	0	2968	15906			1.75843e+06	497147	4.8088e+06	0.206681	0.365669	0.103383	0.413644
201	0	3048	15906			1.62008e+06	599872	4.62577e+06	0.175997	0.350229	0.12968	0.278295
202	0	3128	15906			1.67768e+06	500874	4791736	0.258235	0.35012	0.104529	0.380344
203	0	3208	15906			1.99425e+06	662985	4929130	0.226862	0.404585	0.134503	0.540103
204	0	3288	15906			1.88827e+06	577878	4.51098e+06	0.251846	0.418595	0.128105	0.639782
205	0	3368	15906			1.98889e+06	602088	4443133	0.207286	0.447631	0.13551	0.514626
206	0	3448	15906			2.14267e+06	725161	5258268	0.193792	0.407486	0.137909	0.408311
207	0	3528	15906			1.92959e+06	562632	4368736	0.215095	0.441682	0.128786	0.690446
208	0	3608	15906			1.56929e+06	469924	3.78809e+06	0.204883	0.414268	0.124053	0.660801
209	0	3688	15906			2.23984e+06	829259	4909992	0.200166	0.45618	0.168892	0.549998
210	0	3768	15906			2.15204e+06	788486	4.93539e+06	0.192875	0.436043	0.159762	0.575835
211	0	3848	15906			2.39571e+06	1.13357e+06	5.51717e+06	0.259129	0.434228	0.205462	0.506972
212	0	3928	15906			1.90611e+06	704400	4.95347e+06	0.210153	0.384803	0.142203	0.551995
213	0	4008	15906			2.21808e+06	762913	5.63411e+06	0.304526	0.393688	0.13541	0.482606
214	0	4088	15906			2.36141e+06	1.09952e+06	4977228	0.366829	0.474443	0.220909	0.450496
215	0	4168	15906			2.17911e+06	811055	6.01307e+06	0.408429	0.362396	0.134882	0.575186
216	0	4248	15906			2.04558e+06	979421	5206127	0.497332	0.392918	0.188128	0.388863
217	0	4328	15906			2.12975e+06	848616	5351579	0.422974	0.397968	0.158573	0.319134
218	0	4408	15906			1.87086e+06	818733	5002672	0.424897	0.373972	0.163659	0.366011
219	0	4488	15906			1.54637e+06	776941	4.74499e+06	0.377159	0.325895	0.163739	0.527916
220	0	4568	15906			2.35553e+06	1.05042e+06	6.54852e+06	0.322468	0.359704	0.160406	0.376877
221	0	4648	15906			1.79126e+06	896024	6.03503e+06	0.270437	0.296811	0.148471	0.357027
222	0	4728	15906			1.79625e+06	686198	5.11388e+06	0.259784	0.351251	0.134183	0.444232
223	0	4808	15906			1.98637e+06	916306	6.72624e+06	0.22785	0.295316	0.136229	0.398617
224	0	4888	15906			2.11419e+06	852142	5.45683e+06	0.264837	0.387439	0.156161	0.401529
225	0	4968	15906			1.70978e+06	523035	5.57467e+06	0.217146	0.306706	0.0938235	0.611213
226	0	5048	15906			1.42634e+06	601402	5347099	0.230266	0.26675	0.112473	0.448161
227	0	5128	15906			2.23576e+06	1.09767e+06	6659825	0.288264	0.335708	0.16482	0.655392
228	0	5208	15906			1.97073e+06	852728	5734717	0.308783	0.343648	0.148696	0.293896
229	0	5288	15906			2.22275e+06	970703	6434740	0.370843	0.34543	0.150854	0.385251
230	0	5368	15906			2.52836e+06	1.02358e+06	6.97641e+06	0.362495	0.362416	0.14672	0.38175
231	0	5448	15906			1.91232e+06	847082	5.37362e+06	0.374194	0.355871	0.157637	0.362157
232	0	5528	15906			2.34834e+06	769613	6005149	0.310772	0.391054	0.128159	0.609277
233	0	5608	15906			2.4805e+06	925041	6253023	0.230122	0.396689	0.147935	0.326292
234	0	5688	15906			2.14423e+06	958190	4.91233e+06	0.256995	0.4365	0.195058	0.641014
235	0	5768	15906			2887292	1.07247e+06	6.14335e+06	0.204821	0.469986	0.174574	0.527209
236	0	5848	15906			2.92148e+06	1154515	5.72816e+06	0.181357	0.51002	0.201551	0.486919
237	0	5928	15906			2.34272e+06	1.02094e+06	5.06741e+06	0.210208	0.462311	0.201471	0.583701
238	0	6008	15906			2415682	935229	5562197	0.140477	0.434304	0.16814	0.560815
239	0	6088	15906			2.43199e+06	865206	5480884	0.192855	0.443723	0.157859	0.499258
240	0	6168	15906			2.06512e+06	739889	5.31251e+06	0.163544	0.388728	0.139273	0.464421
241	0	6248	15906			1.85984e+06	812172	5.00503e+06	0.179022	0.371593	0.162271	0.520729
242	0	6328	15906			2.34892e+06	638342	5.09396e+06	0.167593	0.46112	0.125314	0.327571
243	0	6408	15906			1.79685e+06	646839	5.18345e+06	0.158315	0.346651	0.124789	0.413482
244	0	6488	15906			1.71979e+06	550258	5.14966e+06	0.152471	0.333963	0.106853	0.280624
245	0	6568	15906			2192295	670181	5.18725e+06	0.145415	0.422632	0.129198	0.625803
246	0	6648	15906			1.74231e+06	704213	5.59925e+06	0.0993623	0.311169	0.125769	0.431886
247	0	6728	15906			1711018	626450	5.65587e+06	0.100428	0.302521	0.110761	0.351584
248	0	6808	15906			1.47499e+06	620553	5.08266e+06	0.106269	0.290201	0.122092	0.321889
249	0	6888	15906			1.55108e+06	569705	4810381	0.108498	0.322444	0.118432	0.614784
250	0	6968	15906			1.96507e+06	699230	5.50233e+06	0.0925105	0.357134	0.127079	0.483873
251	0	7048	15906			1.76113e+06	642808	5348049	0.0813789	0.329304	0.120195	0.458237
252	0	7128	15906			1.29515e+06	468020	3.84702e+06	0.0853975	0.336662	0.121658	0.459958
253	0	7208	15906			923426	297385	1919715	0.11267	0.481023	0.154911	0.401967
254	0	7288	15906			279507	114966	485141	0.194439	0.576137	0.236974	0.683102
255	0	7368	15906			2131.24	2415.52	204029	0.00898342	0.0104458	0.0118391	0.95178
256	0	1688	15826			1.08722e+06	448382	3.54006e+06	0.0905496	0.30712	0.12666	0.384434
257	0	1768	15826			1.21617e+06	369244	2.9871e+06	0.125911	0.407142	0.123613	0.555164
258	0	1848	15826			1.31484e+06	505973	4.426e+06	0.087515	0.297072	0.114318	0.400253
259	0	1928	15826			390758	121675	1.43531e+06	0.091031	0.272246	0.0847725	0.380311
260	0	2008	15826			1513298	339378	4969592	0.131132	0.304512	0.0682909	0.343003
261	0	2088	15826			1.4118e+06	423875	5176811	0.127866	0.272716	0.0818795	0.303619
262	0	2168	15826			1.3201e+06	469840	5498001	0.0987533	0.240105	0.0854565	0.413268
263	0	2248	15826			1.68609e+06	469793	5643201	0.155738	0.298783	0.0832494	0.322858
264	0	2328	15826			1.62379e+06	537634	5454078	0.159096	0.297721	0.0985747	0.359973
265	0	2408	15826			1.80226e+06	471784	5321349	0.16153	0.338685	0.0886587	0.308659
266	0	2488	15826			1.71948e+06	643623	5.37164e+06	0.162394	0.320103	0.119819	0.342101
267	0	2568	15826			1.4855e+06	609009	4.62471e+06	0.187368	0.321209	0.131686	0.43766
268	0	2648	15826			899748	291440	2.79633e+06	0.183454	0.321761	0.104222	0.40821
269	0	2728	15826			968500	262064	2471947	0.198051	0.391796	0.106015	0.507273
270	0	2808	15826			1.48318e+06	631796	3.99902e+06	0.207537	0.370885	0.157988	0.353572
271	0	2888	15826			2.15905e+06	847881	5.49762e+06	0.210975	0.392724	0.154227	0.425666
272	0	2968	15826			2.01328e+06	915879	5932156	0.182488	0.339384	0.154392	0.469122
273	0	3048	15826			2282645	864528	5.33499e+06	0.228617	0.427863	0.162049	0.543153
274	0	3128	15826			2.1822e+06	750978	4.88861e+06	0.236807	0.446383	0.153618	0.524332
275	0	3208	15826			1.66536e+06	495313	4.77116e+06	0.217575	0.349047	0.103814	0.392931
276	0	3288	15826			1.96812e+06	799764	5.28363e+06	0.274417	0.372493	0.151366	0.442025
277	0	3368	15826			2142991	772562	6115967	0.217939	0.350393	0.126319	0.404895
278	0	3448	15826			2.13649e+06	762194	5.30012e+06	0.239682	0.403103	0.143807	0.622501
279	0	3528	15826			1.47103e+06	618130	5033043	0.227972	0.292274	0.122814	0.407401
280	0	3608	15826			1.86899e+06	764637	5500652	0.225051	0.339775	0.139008	0.411899
281	0	3688	15826			1939356	806939	4580213	0.251032	0.42342	0.176179	0.418141
282	0	3768	15826			1949959	889348	4.97495e+06	0.177333	0.391956	0.178765	0.49861
283	0	3848	15826			2.0526e+06	986455	5309251	0.290196	0.386608	0.185799	0.29735
284	0	3928	15826			2106604	715923	5.16204e+06	0.310083	0.408095	0.13869	0.737285
285	0	4008	15826			1941016	706882	4.07546e+06	0.408757	0.476269	0.173448	0.5162
286	0	4088	15826			2.48506e+06	1178918	5466133	0.416383	0.454628	0.215677	0.697979
287	0	4168	15826			2.04915e+06	924335	4518165	0.51579	0.453536	0.204582	0.284262
288	0	4248	15826			2.14881e+06	898753	4.96348e+06	0.58702	0.432924	0.181073	0.633916
289	0	4328	15826			2.14892e+06	1.07548e+06	4930644	0.575684	0.43583	0.218121	0.517022
290	0	4408	15826			2.20436e+06	1.02894e+06	5101268	0.53866	0.432119	0.201703	0.49899
291	0	4488	15826			2.28354e+06	905433	6.29788e+06	0.376747	0.362589	0.143768	0.370086
292	0	4568	15826			2.0923e+06	838998	6.21501e+06	0.319689	0.336652	0.134996	0.511278
293	0	4648	15826			1.76108e+06	815949	5.88743e+06	0.275453	0.299125	0.138592	0.568642
294	0	4728	15826			1.72134e+06	701841	5.57062e+06	0.262045	0.309004	0.12599	0.322487
295	0	4808	15826			2125235	854869	5991157	0.311863	0.354729	0.142688	0.441522
296	0	4888	15826			1.99594e+06	814552	5694651	0.283334	0.350494	0.143038	0.34564
297	0	4968	15826			1604340	631342	5823488	0.216938	0.275495	0.108413	0.322261
298	0	5048	15826			2.13578e+06	891773	6.61986e+06	0.249891	0.322632	0.134712	0.312488
299	0	5128	15826			1.75361e+06	718998	4986154	0.237727	0.351695	0.144199	0.368563
300	0	5208	15826			1.96578e+06	742053	5121942	0.438866	0.383795	0.144877	0.513732
301	0	5288	15826			2037120	665551	5.38327e+06	0.468927	0.378417	0.123633	0.404678
302	0	5368	15826			2.2007e+06	860806	5.45864e+06	0.479045	0.403159	0.157696	0.373056
303	0	5448	15826			2315324	930492	5367218	0.433427	0.431383	0.173366	0.461856
304	0	5528	15826			1.76997e+06	867939	4.58333e+06	0.395289	0.386175	0.189369	0.612081
305	0	5608	15826			2.09729e+06	740081	4905087	0.374405	0.427575	0.15088	0.52759
306	0	5688	15826			2.26349e+06	1.0879e+06	4910676	0.329727	0.460933	0.221539	0.728932
307	0	5768	15826			2.74836e+06	1.17085e+06	6087987	0.303054	0.451439	0.192321	0.616708
308	0	5848	15826			2.99129e+06	1.09963e+06	5920961	0.307544	0.505203	0.185718	0.520354
309	0	5928	15826			2.5284e+06	1.16925e+06	6799064	0.243998	0.371875	0.171972	0.528373
310	0	6008	15826			2.7525e+06	1.1189e+06	6819324	0.220026	0.403632	0.164077	0.434437
311	0	6088	15826			2.12131e+06	759619	4794458	0.293155	0.442451	0.158437	0.676427
312	0	6168	15826			2.4224e+06	967648	4624698	0.256665	0.523796	0.209235	0.576671
313	0	6248	15826			2.05211e+06	836878	5.48251e+06	0.209852	0.374302	0.152645	0.484857
314	0	6328	15826			2.47533e+06	977779	5880585	0.229592	0.420932	0.166272	0.489584
315	0	6408	15826			1.92072e+06	726888	5.11254e+06	0.207496	0.375688	0.142177	0.619313
316	0	6488	15826			2.06815e+06	677390	5.07391e+06	0.196798	0.407606	0.133504	0.503033
317	0	6568	15826			1.94349e+06	498468	5.74347e+06	0.147797	0.338382	0.0867888	0.559376
318	0	6648	15826			1.68732e+06	658401	5498601	0.16702	0.306863	0.11974	0.342602
319	0	6728	15826			1.76694e+06	652853	5.98305e+06	0.125616	0.295324	0.109117	0.528191
320	0	6808	15826			1.94566e+06	709348	6.37928e+06	0.128765	0.304997	0.111196	0.333822
321	0	6888	15826			1.74149e+06	550301	5386755	0.110203	0.323292	0.102158	0.36256
322	0	6968	15826			1.52098e+06	506977	5.27826e+06	0.107588	0.288159	0.0960499	0.434635
323	0	7048	15826			1.43826e+06	440498	5.11614e+06	0.0963909	0.281123	0.0860998	0.531831
324	0	7128	15826			1.5607e+06	533660	4943027	0.102552	0.315738	0.107962	0.485676
325	0	7208	15826			1.55229e+06	569728	4.51955e+06	0.0991604	0.343461	0.126058	0.36975
326	0	7288	15826			1.30384e+06	462591	3822803	0.0867633	0.341069	0.121008	0.444996
327	0	7368	15826			1065941	438557	2.92064e+06	0.0891912	0.364968	0.150158	0.512837
328	0	7448	15826			694078	259910	2.18592e+06	0.0753784	0.317522	0.118902	0.316304
329	0	1608	15746			263376	97323.1	728232	0.194641	0.361665	0.133643	0.577571
330	0	1688	15746			1.40601e+06	526674	4.36006e+06	0.0984227	0.322475	0.120795	0.376017
331	0	1768	15746			1.70403e+06	678563	6029244	0.104351	0.282628	0.112545	0.361479
332	0	1848	15746			1.45263e+06	591161	5611363	0.116713	0.258874	0.105351	0.362432
333	0	1928	15746			1.24814e+06	419910	5.26634e+06	0.0994178	0.237003	0.0797347	0.180757
334	0	2008	15746			1363483	536349	5897166	0.149306	0.23121	0.0909503	0.280792
335	0	2088	15746			1.3145e+06	357695	5.58868e+06	0.162688	0.235207	0.0640036	0.308549
336	0	2168	15746			1.37701e+06	309961	5.64916e+06	0.168248	0.243754	0.0548685	0.302578
337	0	2248	15746			1.50541e+06	528148	6.22817e+06	0.15678	0.241711	0.0847999	0.505434
338	0	2328	15746			1.78529e+06	486631	5.07872e+06	0.201918	0.351524	0.0958176	0.518692
339	0	2408	15746			1883642	506109	5.36257e+06	0.244243	0.351257	0.094378	0.54443
340	0	2488	15746			1.63598e+06	659717	4.62206e+06	0.305853	0.353949	0.142732	0.585359
341	0	2568	15746			1.38456e+06	499307	3.84438e+06	0.282177	0.360151	0.12988	0.342322
342	0	2648	15746			857332	281838	2.03291e+06	0.283776	0.421727	0.138638	0.700851
343	0	2728	15746			586530	180244	1.87015e+06	0.327916	0.313627	0.0963795	0.375947
344	0	2808	15746			1.55824e+06	559165	4.16707e+06	0.309676	0.373942	0.134187	0.418548
345	0	2888	15746			1.82466e+06	639929	4.09991e+06	0.293531	0.445048	0.156084	0.538829
346	0	2968	15746			1.83428e+06	809287	5045979	0.319281	0.363513	0.160383	0.465995
347	0	3048	15746			1.74089e+06	652125	4779119	0.30408	0.364271	0.136453	0.621738
348	0	3128	15746			1.84093e+06	875191	4844874	0.313471	0.379975	0.180643	0.497273
349	0	3208	15746			1.85365e+06	856145	5884337	0.332155	0.315015	0.145496	0.390412
350	0	3288	15746			1.74997e+06	815562	5061158	0.331091	0.345765	0.161141	0.402305
351	0	3368	15746			1.89787e+06	726835	5417350	0.319609	0.350331	0.134168	0.453676
352	0	3448	15746			2.08266e+06	877116	5.57336e+06	0.274607	0.373681	0.157376	0.398935
353	0	3528	15746			1.85399e+06	887161	4.81114e+06	0.304604	0.385355	0.184397	0.442616
354	0	3608	15746			1.82987e+06	934848	4703789	0.352105	0.38902	0.198744	0.372771
355	0	3688	15746			1.8348e+06	780271	4.8165e+06	0.307105	0.380941	0.162	0.511342
356	0	3768	15746			2.19677e+06	904602	5324698	0.320746	0.412562	0.169888	0.535476
357	0	3848	15746			2142128	909125	4920263	0.349106	0.435369	0.184772	0.592388
358	0	3928	15746			2319369	1.01686e+06	5.68252e+06	0.348225	0.408158	0.178944	0.525054
359	0	4008	15746			1.97851e+06	1.0038e+06	4.56503e+06	0.421013	0.433407	0.21989	0.347013
360	0	4088	15746			2.69622e+06	1.25941e+06	5.4104e+06	0.662545	0.498341	0.232776	0.709933
361	0	4168	15746			1.92138e+06	1.00275e+06	4.14415e+06	0.836377	0.463637	0.241968	0.279996
362	0	4248	15746			1.98066e+06	1.01201e+06	4.11753e+06	0.68978	0.48103	0.245781	0.474173
363	0	4328	15746			2.3345e+06	1.14032e+06	4960509	0.728631	0.470617	0.229879	0.455487
364	0	4408	15746			2.36795e+06	1135682	5065828	0.626551	0.467435	0.224185	0.535002
365	0	4488	15746			1966192	878325	5233923	0.447548	0.375663	0.167814	0.449986
366	0	4568	15746			2.23104e+06	1.0679e+06	6039250	0.360267	0.369424	0.176827	0.431079
367	0	4648	15746			1.85796e+06	751200	6147019	0.338004	0.302254	0.122206	0.371024
368	0	4728	15746			2.08693e+06	845905	5546281	0.235193	0.376276	0.152517	0.34708
369	0	4808	15746			2.18581e+06	918753	6.18414e+06	0.291519	0.353454	0.148566	0.440887
370	0	4888	15746			2251206	1.05143e+06	6.461e+06	0.308323	0.34843	0.162734	0.391439
371	0	4968	15746			1.70829e+06	704123	5943006	0.257815	0.287446	0.118479	0.41404
372	0	5048	15746			1852266	665103	5.79412e+06	0.29712	0.31968	0.114789	0.477266
373	0	5128	15746			1.86672e+06	800169	5107665	0.291505	0.365474	0.15666	0.476616
374	0	5208	15746			1.59938e+06	610938	4.84019e+06	0.405837	0.330438	0.126222	0.393028
375	0	5288	15746			1.94733e+06	766828	4706355	0.513891	0.413767	0.162935	0.515769
376	0	5368	15746			2286241	964317	5147441	0.583694	0.444151	0.187339	0.714857
377	0	5448	15746			2.62825e+06	1.0223e+06	5559774	0.590042	0.472727	0.183874	0.447322
378	0	5528	15746			2.74901e+06	1.13679e+06	5425089	0.687396	0.506722	0.209543	0.449163
379	0	5608	15746			2.84411e+06	1.32271e+06	6.03358e+06	0.534339	0.471379	0.219224	0.824953
380	0	5688	15746			2.46029e+06	1.16626e+06	5.97644e+06	0.432745	0.411664	0.195142	0.426539
381	0	5768	15746			2.30776e+06	1.02906e+06	5.62759e+06	0.425323	0.41008	0.182859	0.986453
382	0	5848	15746			2.16234e+06	1.04543e+06	4678379	0.329815	0.462199	0.223461	0.583267
383	0	5928	15746			2.20797e+06	940261	5.5186e+06	0.293371	0.400097	0.170381	0.492186
384	0	6008	15746			2.16767e+06	843720	4.84414e+06	0.246598	0.447483	0.174173	0.557633
385	0	6088	15746			2.33307e+06	1.12416e+06	4812845	0.443096	0.484759	0.233576	0.460499
386	0	6168	15746			2.29232e+06	787703	5487137	0.312311	0.417762	0.143554	0.528054
387	0	6248	15746			2.09113e+06	957564	6070368	0.214897	0.344481	0.157744	0.457279
388	0	6328	15746			1.47598e+06	699504	4933753	0.234129	0.299159	0.141779	0.306327
389	0	6408	15746			1.9025e+06	812375	5.04579e+06	0.25366	0.377047	0.161001	0.427464
390	0	6488	15746			2.16139e+06	810283	5.58908e+06	0.239772	0.386716	0.144976	0.409545
391	0	6568	15746			2.48811e+06	935223	6605027	0.222756	0.376699	0.141593	0.542665
392	0	6648	15746			1.96524e+06	627928	5205423	0.202623	0.377537	0.12063	0.332701
393	0	6728	15746			1.41985e+06	538185	4.76449e+06	0.177143	0.298007	0.112958	0.304106
394	0	6808	15746			1.88312e+06	580484	5.96242e+06	0.178708	0.315831	0.0973572	0.348177
395	0	6888	15746			1.75867e+06	641509	6440280	0.135438	0.273074	0.0996088	0.27109
396	0	6968	15746			1561149	550061	5.76785e+06	0.141959	0.270664	0.0953668	0.344374
397	0	7048	15746			1534846	627747	5.56987e+06	0.136997	0.275562	0.112704	0.366117
398	0	7128	15746			1.77468e+06	521819	5.62683e+06	0.11947	0.315396	0.0927376	0.381129
399	0	7208	15746			1.55036e+06	461510	5.13179e+06	0.111537	0.302108	0.0899315	0.539619
400	0	7288	15746			1.54192e+06	616770	5.50088e+06	0.120217	0.280304	0.112122	0.428972
401	0	7368	15746			1.74208e+06	568608	5.57133e+06	0.104001	0.312687	0.10206	0.32548
402	0	7448	15746			1531146	459468	4592082	0.0901352	0.333432	0.100057	0.361484
403	0	7528	15746			1.30189e+06	431202	4315965	0.0819214	0.301645	0.0999085	0.445336
404	0	7608	15746			1.08874e+06	379076	3.04469e+06	0.0767502	0.357587	0.124504	0.488454
405	0	1528	15666			1.68057e+06	499097	4.78842e+06	0.0918227	0.350966	0.10423	0.354676
406	0	1608	15666			1520621	609895	5.37561e+06	0.110562	0.282874	0.113456	0.285299
407	0	1688	15666			1.66831e+06	423279	4979135	0.125065	0.33506	0.0850105	0.418847
408	0	1768	15666			1.62079e+06	506094	6.41422e+06	0.130158	0.252687	0.0789018	0.318194
409	0	1848	15666			1.57781e+06	546557	7223927	0.15101	0.218414	0.0756592	0.289389
410	0	1928	15666			1.46977e+06	440331	6.49974e+06	0.173934	0.226128	0.0677459	0.394536
411	0	2008	15666			1.54213e+06	487218	5.97045e+06	0.176173	0.258294	0.0816049	0.258508
412	0	2088	15666			1.49198e+06	455277	5933478	0.21415	0.251451	0.0767302	0.251139
413	0	2168	15666			1.54951e+06	550338	6.90298e+06	0.245811	0.22447	0.0797246	0.419911
414	0	2248	15666			1.82358e+06	595568	5657708	0.326539	0.322317	0.105267	0.361924
415	0	2328	15666			2.01906e+06	706064	6.03055e+06	0.341487	0.334805	0.117081	0.305116
416	0	2408	15666			2.07962e+06	859285	5.83792e+06	0.249063	0.356226	0.14719	0.338913
417	0	2488	15666			1.99274e+06	669431	4953832	0.241144	0.402262	0.135134	0.469969
418	0	2568	15666			1.22918e+06	308450	3.04187e+06	0.309281	0.404088	0.101401	0.482937
419	0	2648	15666			429632	150902	1.13776e+06	0.332365	0.377613	0.132631	0.403307
420	0	2728	15666			339177	164390	850934	0.369459	0.398594	0.193187	0.354076
421	0	2808	15666			1.26055e+06	555223	3951533	0.328957	0.319004	0.140508	0.452286
422	0	2888	15666			1.57229e+06	691908	4.2953e+06	0.318957	0.366049	0.161085	0.431999
423	0	2968	15666			1.73779e+06	714107	4669962	0.342477	0.372122	0.152915	0.397059
424	0	3048	15666			1.90014e+06	669815	4.29945e+06	0.375536	0.441949	0.155791	0.489344
425	0	3128	15666			2023289	760126	4938451	0.376549	0.409701	0.15392	0.565525
426	0	3208	15666			2276427	902022	5.59509e+06	0.338712	0.406861	0.161217	0.499956
427	0	3288	15666			1.97707e+06	867272	5.48514e+06	0.387433	0.360441	0.158113	0.532963
428	0	3368	15666			1.73512e+06	809848	4.46484e+06	0.349083	0.388618	0.181383	0.564246
429	0	3448	15666			2.04594e+06	629227	4.47839e+06	0.390893	0.456847	0.140503	0.519391
430	0	3528	15666			1.72501e+06	737092	3.72743e+06	0.441809	0.462787	0.197748	0.642647
431	0	3608	15666			2.17632e+06	1.02028e+06	4824665	0.377435	0.451082	0.211472	0.537304
432	0	3688	15666			2.155e+06	895598	4.55458e+06	0.374093	0.47315	0.196637	0.558705
433	0	3768	15666			2193161	954530	4.83172e+06	0.388813	0.453909	0.197555	0.548534
434	0	3848	15666			1855937	710472	4.44069e+06	0.381484	0.417938	0.159991	0.45892
435	0	3928	15666			2.6056e+06	1.11617e+06	5.35739e+06	0.544763	0.486355	0.208342	0.804818
436	0	4008	15666			2.27842e+06	1.21809e+06	4.76624e+06	0.604039	0.478033	0.255567	0.463711
437	0	4088	15666			2.12248e+06	1.03247e+06	3.99454e+06	0.948033	0.531345	0.258469	0.533941
438	0	4168	15666			2.85896e+06	1280604	5138000	1.04201	0.556435	0.249242	0.522993
439	0	4248	15666			2.33531e+06	1.16771e+06	4.72854e+06	0.850357	0.493875	0.246949	0.742961
440	0	4328	15666			2496178	1.20752e+06	5332997	0.746813	0.468063	0.226424	0.35778
441	0	4408	15666			1.9371e+06	942915	4.20402e+06	0.883261	0.460773	0.224289	0.713787
442	0	4488	15666			1761757	986820	5.19049e+06	0.448119	0.33942	0.190121	0.497857
443	0	4568	15666			2.09625e+06	956384	5838972	0.404736	0.359011	0.163793	0.487156
444	0	4648	15666			1.72118e+06	645941	5.37695e+06	0.334469	0.320104	0.120132	0.381785
445	0	4728	15666			2254405	1.00951e+06	6.80077e+06	0.285984	0.331492	0.148441	0.411726
446	0	4808	15666			2.2501e+06	1.04781e+06	6.15284e+06	0.368206	0.365701	0.170297	0.362152
447	0	4888	15666			1.73303e+06	764019	6293600	0.293754	0.275364	0.121396	0.472526
448	0	4968	15666			1930271	740304	5.98891e+06	0.268825	0.322308	0.123613	0.274898
449	0	5048	15666			1.92411e+06	979015	5863644	0.348815	0.328142	0.166964	0.282075
450	0	5128	15666			2113311	811072	5.72859e+06	0.348522	0.368906	0.141583	0.325201
451	0	5208	15666			2.34802e+06	829452	6.19651e+06	0.443605	0.378926	0.133858	0.51901
452	0	5288	15666			2.25701e+06	894236	5631596	0.535131	0.400776	0.158789	0.330809
453	0	5368	15666			2.0856e+06	1367151	4.70229e+06	0.725228	0.443529	0.290742	0.504232
454	0	5448	15666			2.52766e+06	1.01061e+06	5473587	0.76717	0.461793	0.184633	0.639042
455	0	5528	15666			2.76775e+06	1015002	4561673	0.866305	0.606741	0.222507	0.439157
456	0	5608	15666			2.98797e+06	1.50628e+06	6063738	0.641641	0.492761	0.248408	0.615201
457	0	5688	15666			3.02989e+06	1450922	6459255	0.522387	0.469078	0.224627	0.601552
458	0	5768	15666			2.72275e+06	1.09004e+06	6.15533e+06	0.433773	0.44234	0.177089	0.302609
459	0	5848	15666			2.51323e+06	1.04144e+06	4892281	0.404773	0.513712	0.212874	0.438282
460	0	5928	15666			2.35249e+06	1.19558e+06	5361296	0.369378	0.438791	0.223003	0.507317
461	0	6008	15666			2.37963e+06	936607	5.41567e+06	0.32442	0.439397	0.172944	0.526192
462	0	6088	15666			1867841	859873	4326565	0.287027	0.431715	0.198743	0.499331
463	0	6168	15666			1669943	748438	4611556	0.293441	0.362121	0.162296	0.651836
464	0	6248	15666			1.63497e+06	658104	3.7637e+06	0.323649	0.434405	0.174856	0.608662
465	0	6328	15666			239743	78221.2	535527	0.389867	0.447677	0.146064	0.486864
466	0	6408	15666			1.56289e+06	663121	3.95357e+06	0.293615	0.39531	0.167727	0.466122
467	0	6488	15666			2.1048e+06	824542	4966529	0.291209	0.423797	0.16602	0.398815
468	0	6568	15666			1.85923e+06	733174	5128189	0.297828	0.36255	0.142969	0.493045
469	0	6648	15666			2.15901e+06	1.03263e+06	6115232	0.219979	0.353054	0.168862	0.372593
470	0	6728	15666			2.05921e+06	632657	5370808	0.270761	0.383409	0.117796	0.471714
471	0	6808	15666			1.89245e+06	811514	5.80375e+06	0.200859	0.326073	0.139826	0.367651
472	0	6888	15666			1.76661e+06	737806	6847969	0.190799	0.257976	0.107741	0.407685
473	0	6968	15666			2.17416e+06	707850	7196953	0.170594	0.302095	0.0983542	0.380017
474	0	7048	15666			1.82001e+06	644957	5.75141e+06	0.17527	0.316446	0.112139	0.225619
475	0	7128	15666			1.25452e+06	476705	5.39329e+06	0.150239	0.232607	0.0883887	0.327461
476	0	7208	15666			1.61008e+06	506068	5.69223e+06	0.123049	0.282856	0.0889052	0.44962
477	0	7288	15666			1.54685e+06	587141	5201203	0.116189	0.297402	0.112886	0.288544
478	0	7368	15666			1.49382e+06	434453	5242908	0.108718	0.284921	0.0828648	0.314507
479	0	7448	15666			1.61523e+06	480967	5347619	0.126493	0.302046	0.0899404	0.375933
480	0	7528	15666			1.6396e+06	581473	6.17609e+06	0.103328	0.265476	0.0941491	0.449892
481	0	7608	15666			1.71459e+06	502758	5.10264e+06	0.120346	0.33602	0.098529	0.615685
482	0	7688	15666			1288623	455091	3981745	0.104186	0.323633	0.114294	0.455915
483	0	7768	15666			1.00045e+06	368897	2.53714e+06	0.112119	0.394321	0.145398	0.381275
484	0	1528	15586			1108202	391046	3.69984e+06	0.123915	0.299527	0.105693	0.349554
485	0	1608	15586			1.12041e+06	416063	5154944	0.0856813	0.217346	0.0807115	0.274642
486	0	1688	15586			1.36749e+06	483568	5.24171e+06	0.166848	0.260886	0.0922538	0.340261
487	0	1768	15586			1.24417e+06	517563	6.73809e+06	0.171793	0.184648	0.0768115	0.403003
488	0	1848	15586			1613848	614320	6960483	0.181045	0.231859	0.0882583	0.245006
489	0	1928	15586			1.72802e+06	476044	6.57558e+06	0.244286	0.262794	0.0723957	0.412482
490	0	2008	15586			1.33288e+06	469308	5.02421e+06	0.227423	0.265292	0.0934093	0.250169
491	0	2088	15586			1.39861e+06	411501	4.89461e+06	0.323001	0.285745	0.0840722	0.384358
492	0	2168	15586			1.50663e+06	537844	6.40925e+06	0.230693	0.23507	0.0839167	0.476961
493	0	2248	15586			1.85862e+06	694040	6.00882e+06	0.350322	0.309316	0.115504	0.332272
494	0	2328	15586			1.86755e+06	686511	4758802	0.377358	0.392441	0.144261	0.636321
495	0	2408	15586			1.66713e+06	624029	5.27712e+06	0.332421	0.315917	0.118252	0.386524
496	0	2488	15586			1168904	422307	3.13263e+06	0.287501	0.373138	0.134809	0.4734
497	0	2568	15586			1.15346e+06	493030	2.77866e+06	0.428382	0.415116	0.177435	0.259632
498	0	2648	15586			969920	415770	3.39489e+06	0.328754	0.2857	0.12247	0.399237
499	0	2728	15586			1.06095e+06	459426	2619348	0.37033	0.405044	0.175397	0.377777
500	0	2808	15586			1.5424e+06	660960	3313450	0.486085	0.465498	0.199478	0.451815
501	0	2888	15586			1.77174e+06	643738	4.11415e+06	0.415357	0.430644	0.156469	0.447766
502	0	2968	15586			1.88994e+06	980756	5.5375e+06	0.364245	0.341298	0.177112	0.46222
503	0	3048	15586			1.77721e+06	828282	4675512	0.498378	0.38011	0.177153	0.586214
504	0	3128	15586			2027044	906391	4.8605e+06	0.49381	0.417044	0.186481	0.33151
505	0	3208	15586			2.38353e+06	1.1785e+06	5.98768e+06	0.485302	0.398073	0.19682	0.41149
506	0	3288	15586			1.99281e+06	1.00645e+06	5174408	0.449291	0.385128	0.194504	0.613823
507	0	3368	15586			2.2191e+06	728261	4859372	0.446351	0.456665	0.149867	0.506942
508	0	3448	15586			2.1239e+06	783338	4.8128e+06	0.450456	0.441302	0.162762	0.525846
509	0	3528	15586			2.22135e+06	1.00285e+06	4718793	0.496337	0.470745	0.212524	0.463468
510	0	3608	15586			2.35208e+06	1160867	5.53626e+06	0.420292	0.42485	0.209684	0.608873
511	0	3688	15586			2594323	1.17376e+06	4.7619e+06	0.545483	0.544808	0.24649	0.507218
512	0	3768	15586			2.26837e+06	1.07918e+06	4938400	0.515888	0.459333	0.218529	0.516199
513	0	3848	15586			1.88896e+06	1.03239e+06	3.74587e+06	0.577052	0.504278	0.275608	0.566638
514	0	3928	15586			2.43029e+06	1.10695e+06	4747429	0.695807	0.511917	0.233169	0.466224
515	0	4008	15586			2786251	1724410	4876690	0.953496	0.571341	0.353603	0.649328
516	0	4088	15586			2.6355e+06	1.54264e+06	3872402	1.26433	0.680584	0.398368	0.717414
517	0	4168	15586			2.81806e+06	1.27774e+06	4.08212e+06	1.07154	0.690342	0.313009	0.744291
518	0	4248	15586			2.55304e+06	1.29866e+06	4308277	1.06829	0.59259	0.301434	0.76858
519	0	4328	15586			2.17507e+06	1.10295e+06	4.04972e+06	0.901731	0.537091	0.272352	0.506196
520	0	4408	15586			2.04418e+06	949423	4740545	0.572905	0.431211	0.200277	0.212665
521	0	4488	15586			2.04634e+06	1.05094e+06	5194210	0.503342	0.393966	0.20233	0.414235
522	0	4568	15586			2.1849e+06	852847	5507115	0.397275	0.396742	0.154863	0.416283
523	0	4648	15586			1779926	856263	5.42088e+06	0.377479	0.328346	0.157956	0.519079
524	0	4728	15586			1.67661e+06	772664	5929091	0.298028	0.282778	0.130317	0.451182
525	0	4808	15586			2.30796e+06	859113	5468517	0.350702	0.422045	0.157102	0.621782
526	0	4888	15586			2.13653e+06	811640	5.87248e+06	0.287324	0.363822	0.138211	0.37836
527	0	4968	15586			2.02707e+06	985659	6.40831e+06	0.318549	0.316319	0.15381	0.356609
528	0	5048	15586			2190963	783979	6046732	0.448492	0.362338	0.129653	0.321451
529	0	5128	15586			2.03073e+06	829244	6043323	0.344491	0.336029	0.137217	0.468706
530	0	5208	15586			1447569	723417	4.31653e+06	0.559985	0.335355	0.167592	0.480105
531	0	5288	15586			1.44612e+06	708894	3.40497e+06	0.74854	0.42471	0.208194	0.385554
532	0	5368	15586			2.35461e+06	1.05196e+06	4.54298e+06	0.887083	0.518297	0.231558	0.705953
533	0	5448	15586			2.60261e+06	1187132	4805799	0.965634	0.541555	0.247021	0.641463
534	0	5528	15586			2715269	1.53398e+06	5.13383e+06	1.01659	0.528897	0.298798	0.371393
535	0	5608	15586			2.88885e+06	1.45081e+06	5.40549e+06	0.895451	0.534428	0.268395	0.594525
536	0	5688	15586			2.78914e+06	1.19875e+06	4844945	0.82917	0.57568	0.247422	0.561777
537	0	5768	15586			2.70218e+06	1.2092e+06	4900395	0.576738	0.551421	0.246756	1.07328
538	0	5848	15586			2.60732e+06	1.04524e+06	5227302	0.504571	0.498788	0.199958	0.429335
539	0	5928	15586			2532693	1.17275e+06	5.82723e+06	0.454893	0.434631	0.201254	0.644264
540	0	6008	15586			2.27804e+06	1.13057e+06	5244796	0.414945	0.434342	0.215561	0.580142
541	0	6088	15586			2.21422e+06	753697	4807286	0.409634	0.460596	0.156782	0.482802
542	0	6168	15586			2.04609e+06	862238	5.14717e+06	0.387899	0.397518	0.167517	0.455181
543	0	6248	15586			1.22329e+06	486603	3.24408e+06	0.380334	0.377084	0.149998	0.344338
544	0	6328	15586			1283216	517506	3.46477e+06	0.331707	0.370361	0.149362	0.405767
545	0	6408	15586			1.60858e+06	679003	4.35424e+06	0.327772	0.369428	0.155941	0.379767
546	0	6488	15586			1.69507e+06	899621	5712382	0.294976	0.296737	0.157486	0.397881
547	0	6568	15586			1.95027e+06	884227	5099780	0.332334	0.382422	0.173385	0.491741
548	0	6648	15586			1616941	799913	4686354	0.319105	0.345032	0.17069	0.607538
549	0	6728	15586			2.4197e+06	946948	6262097	0.272211	0.386405	0.151219	0.563924
550	0	6808	15586			2.16645e+06	820734	6511942	0.28292	0.332689	0.126035	0.51906
551	0	6888	15586			2.33707e+06	809437	6683708	0.223575	0.349666	0.121106	0.405122
552	0	6968	15586			1.9666e+06	852469	6.29058e+06	0.232206	0.312627	0.135515	0.454703
553	0	7048	15586			2.31281e+06	689196	6965979	0.238191	0.332015	0.0989374	0.32497
554	0	7128	15586			1.46894e+06	504765	5239197	0.198805	0.280375	0.0963441	0.465716
555	0	7208	15586			1.65547e+06	556488	5469929	0.217451	0.302649	0.101736	0.328901
556	0	7288	15586			1.65711e+06	552013	6.26062e+06	0.178638	0.264687	0.0881722	0.33091
557	0	7368	15586			1.43232e+06	555449	6298921	0.148166	0.227392	0.0881817	0.331149
558	0	7448	15586			1.64233e+06	556240	5.97741e+06	0.153585	0.274757	0.093057	0.339934
559	0	7528	15586			1414844	415973	5.41427e+06	0.135196	0.261318	0.0768291	0.42996
560	0	7608	15586			1.28654e+06	562427	5.03001e+06	0.102024	0.255774	0.111814	0.479711
561	0	7688	15586			1.59492e+06	517466	5757755	0.116825	0.277004	0.0898729	0.402757
562	0	7768	15586			1.38361e+06	562101	4963443	0.129964	0.27876	0.113248	0.390278
563	0	7848	15586			1.48433e+06	493673	4.93759e+06	0.0820469	0.300618	0.0999827	0.378149
564	0	1448	15506			964325	495578	4.38022e+06	0.0853191	0.220154	0.11314	0.406683
565	0	1528	15506			1.33923e+06	348148	5.54381e+06	0.126087	0.241572	0.0627995	0.336887
566	0	1608	15506			1276740	359768	5673078	0.156665	0.225052	0.0634166	0.300295
567	0	1688	15506			1.33793e+06	391786	5.45393e+06	0.188713	0.245315	0.0718355	0.413331
568	0	1768	15506			1.29185e+06	224614	5325210	0.22864	0.24259	0.0421794	0.336737
569	0	1848	15506			1.38453e+06	429557	5.53691e+06	0.299332	0.250054	0.0775805	0.488563
570	0	1928	15506			1.50101e+06	593413	5394719	0.345226	0.278237	0.109999	0.38669
571	0	2008	15506			2.0061e+06	634324	6.34645e+06	0.324809	0.316098	0.0999494	0.346624
572	0	2088	15506			1.47959e+06	775871	6275979	0.340744	0.235754	0.123625	0.385731
573	0	2168	15506			2.08602e+06	635227	6.22463e+06	0.353815	0.335123	0.10205	0.432085
574	0	2248	15506			1.78991e+06	822253	4625846	0.525915	0.386937	0.177752	0.416035
575	0	2328	15506			1.88405e+06	810995	4854114	0.448303	0.388134	0.167074	0.490634
576	0	2408	15506			919219	423001	2.4551e+06	0.468219	0.374412	0.172295	0.608215
577	0	2488	15506			899130	346831	2367896	0.418231	0.379717	0.146472	0.419274
578	0	2568	15506			1282184	550168	3648656	0.398391	0.351413	0.150786	0.575629
579	0	2648	15506			1.3419e+06	632924	4.34672e+06	0.419999	0.308716	0.14561	0.434654
580	0	2728	15506			1244195	438926	3.19347e+06	0.513499	0.389606	0.137445	0.571803
581	0	2808	15506			1.49185e+06	691917	3.42514e+06	0.570276	0.435559	0.202012	0.321147
582	0	2888	15506			1.70695e+06	848379	4.52235e+06	0.506315	0.377448	0.187597	0.404943
583	0	2968	15506			2187798	1.01921e+06	4914472	0.467367	0.445175	0.20739	0.553173
584	0	3048	15506			2.07484e+06	901277	5.30698e+06	0.500675	0.390963	0.169829	0.509858
585	0	3128	15506			2.36163e+06	1.03212e+06	5683998	0.533378	0.415488	0.181583	0.570737
586	0	3208	15506			2257024	897139	4789811	0.67115	0.471214	0.187302	0.576736
587	0	3288	15506			2.38351e+06	973169	4550537	0.662904	0.523786	0.213858	0.433479
588	0	3368	15506			2.07555e+06	1.06336e+06	5252348	0.502808	0.395166	0.202454	0.574004
589	0	3448	15506			2.15203e+06	1.09839e+06	4206165	0.675671	0.511636	0.261139	0.69221
590	0	3528	15506			2.27752e+06	1.01196e+06	4.11121e+06	0.705818	0.553977	0.246145	0.684124
591	0	3608	15506			2.65561e+06	1.35753e+06	5.05495e+06	0.701471	0.525348	0.268555	0.733912
592	0	3688	15506			2.82716e+06	1.13417e+06	4590957	0.747002	0.61581	0.247045	0.731708
593	0	3768	15506			2.82987e+06	1.35215e+06	4.53855e+06	0.806839	0.623517	0.297926	0.692597
594	0	3848	15506			1.34793e+06	871153	2.44907e+06	1.01157	0.550383	0.355708	0.593653
595	0	3928	15506			1.69179e+06	1.02039e+06	2.98757e+06	0.919929	0.566278	0.341545	0.590178
596	0	4008	15506			1.82255e+06	1.13351e+06	2748775	1.28353	0.663041	0.412368	0.671784
597	0	4088	15506			1.6545e+06	1.14002e+06	2.72192e+06	1.34429	0.607844	0.41883	0.4307
598	0	4168	15506			1.9501e+06	1.12303e+06	2767823	1.43043	0.704562	0.405744	0.523614
599	0	4248	15506			2.16117e+06	1.07536e+06	3.65315e+06	0.964699	0.591591	0.294366	0.511178
600	0	4328	15506			2.07759e+06	1.0108e+06	4.66014e+06	0.83021	0.445822	0.216903	0.533908
601	0	4408	15506			1.91396e+06	1.07394e+06	5.49063e+06	0.616637	0.348587	0.195595	0.525398
602	0	4488	15506			1.66593e+06	829551	5.168e+06	0.585069	0.322356	0.160517	0.492114
603	0	4568	15506			1.80526e+06	867844	5.57313e+06	0.436294	0.323923	0.155719	0.322574
604	0	4648	15506			1.72018e+06	672991	5247593	0.368423	0.327803	0.128248	0.452859
605	0	4728	15506			1.9937e+06	940075	5.32558e+06	0.413832	0.374363	0.176521	0.47938
606	0	4808	15506			2189831	787776	5.52582e+06	0.418194	0.396291	0.142563	0.572014
607	0	4888	15506			2.05817e+06	854730	5878775	0.310835	0.350102	0.145392	0.360012
608	0	4968	15506			2.06886e+06	1.03114e+06	5767052	0.33434	0.358739	0.178799	0.505428
609	0	5048	15506			2.04848e+06	1.14703e+06	5.93603e+06	0.423668	0.345092	0.193232	0.385592
610	0	5128	15506			2.0668e+06	1.04e+06	6561296	0.429708	0.314999	0.158505	0.468185
611	0	5208	15506			1.81051e+06	1.06381e+06	5482057	0.486419	0.33026	0.194052	0.343141
612	0	5288	15506			2.27565e+06	1.30502e+06	5.18891e+06	0.756559	0.43856	0.251502	0.482038
613	0	5368	15506			2.54646e+06	1.36096e+06	5689983	0.85118	0.447535	0.239185	0.667386
614	0	5448	15506			2.15494e+06	1.47172e+06	4.42565e+06	0.937575	0.48692	0.332543	0.347437
615	0	5528	15506			2.89423e+06	1.59576e+06	5449943	1.04314	0.531057	0.292802	0.801664
616	0	5608	15506			2826441	1.69643e+06	4438923	1.2332	0.63674	0.38217	0.859301
617	0	5688	15506			2.91761e+06	1.43471e+06	4.83723e+06	0.976274	0.603156	0.296598	0.555408
618	0	5768	15506			2.92629e+06	1.71294e+06	4.90508e+06	0.948626	0.596584	0.349218	0.53867
619	0	5848	15506			2692919	1.15005e+06	4676340	0.816805	0.57586	0.24593	0.604032
620	0	5928	15506			2.47899e+06	1185634	4797135	0.568	0.516764	0.247155	0.650996
621	0	6008	15506			1.90724e+06	750744	3255984	0.565464	0.585764	0.230573	0.568779
622	0	6088	15506			1.72308e+06	811280	3.84809e+06	0.5498	0.447775	0.210826	0.56175
623	0	6168	15506			2.06573e+06	866997	5.1358e+06	0.346306	0.402222	0.168814	0.606434
624	0	6248	15506			1.16673e+06	486013	3020538	0.427232	0.386265	0.160903	0.509599
625	0	6328	15506			1.55858e+06	836797	4.06799e+06	0.455427	0.383131	0.205703	0.44336
626	0	6408	15506			1730640	821465	4413414	0.397958	0.392132	0.186129	0.359406
627	0	6488	15506			1.96385e+06	659989	5.02423e+06	0.391513	0.390876	0.131361	0.452381
628	0	6568	15506			2.03647e+06	815161	5337049	0.379238	0.381572	0.152736	0.396882
629	0	6648	15506			2.00223e+06	826194	5.52003e+06	0.38215	0.36272	0.149672	0.410355
630	0	6728	15506			2.29687e+06	921088	6.77877e+06	0.316891	0.338833	0.135878	0.315495
631	0	6808	15506			2.11846e+06	893804	6.66172e+06	0.347164	0.318004	0.13417	0.438574
632	0	6888	15506			1.90548e+06	1.02473e+06	5.68749e+06	0.330914	0.33503	0.180173	0.420673
633	0	6968	15506			1748548	674719	5334124	0.23333	0.327804	0.126491	0.48019
634	0	7048	15506			1.77975e+06	674549	5157732	0.228907	0.345064	0.130784	0.578248
635	0	7128	15506			1.81991e+06	589384	6295912	0.229118	0.289063	0.0936138	0.440738
636	0	7208	15506			1.84453e+06	787956	6221869	0.300804	0.296459	0.126643	0.372663
637	0	7288	15506			1.83708e+06	619393	6.08853e+06	0.210642	0.301728	0.101731	0.341548
638	0	7368	15506			1.7436e+06	579446	6.93773e+06	0.169676	0.251321	0.0835209	0.302837
639	0	7448	15506			1.3371e+06	493548	5279204	0.152863	0.253277	0.0934892	0.249137
640	0	7528	15506			1.42867e+06	554191	5851252	0.195814	0.244164	0.0947132	0.384066
641	0	7608	15506			1.94837e+06	661338	7082310	0.139018	0.275104	0.0933788	0.335476
642	0	7688	15506			1.54261e+06	402151	5719335	0.131988	0.269719	0.0703142	0.473448
643	0	7768	15506			1.31344e+06	479021	5743767	0.110573	0.228672	0.0833985	0.371368
644	0	7848	15506			1.50811e+06	504163	5.99255e+06	0.0900479	0.251665	0.0841317	0.328895
645	0	7928	15506			1.36561e+06	428353	4934567	0.0814553	0.276743	0.0868067	0.397798
646	0	8008	15506			962248	382853	3473411	0.104229	0.277033	0.110224	0.381675
647	0	1368	15426			803560	227508	3.86651e+06	0.123208	0.207826	0.0588406	0.244809
648	0	1448	15426			1.13237e+06	350434	4.46826e+06	0.171135	0.253425	0.0784275	0.128226
649	0	1528	15426			1.03943e+06	304731	5578052	0.167265	0.186343	0.0546303	0.328987
650	0	1608	15426			1.55438e+06	451146	6.52369e+06	0.202572	0.238267	0.069155	0.316733
651	0	1688	15426			1.42027e+06	395960	5328655	0.282681	0.266535	0.0743077	0.282366
652	0	1768	15426			1.28903e+06	611098	5.72448e+06	0.278544	0.225178	0.106752	0.332529
653	0	1848	15426			1.37133e+06	503232	4850285	0.391964	0.282732	0.103753	0.251418
654	0	1928	15426			1.59984e+06	610909	4.90003e+06	0.465918	0.326495	0.124675	0.42306
655	0	2008	15426			1.47023e+06	608502	4639469	0.439001	0.316897	0.131158	0.339727
656	0	2088	15426			2.01617e+06	734449	6.02722e+06	0.440831	0.334511	0.121855	0.358916
657	0	2168	15426			2.07865e+06	761688	6395313	0.384126	0.325027	0.119101	0.343829
658	0	2248	15426			1.31101e+06	566661	4.00329e+06	0.656027	0.327484	0.141549	0.557637
659	0	2328	15426			1.39409e+06	643425	4.13525e+06	0.612619	0.337123	0.155595	0.421996
660	0	2408	15426			1.28689e+06	592091	4.03583e+06	0.532327	0.318867	0.146709	0.584496
661	0	2488	15426			1.11193e+06	467749	3241080	0.507715	0.343074	0.144319	0.543347
662	0	2568	15426			1.18894e+06	638330	3348844	0.464714	0.35503	0.190612	0.285981
663	0	2648	15426			1.98678e+06	955520	4974794	0.547936	0.39937	0.192072	0.409714
664	0	2728	15426			2.29702e+06	887975	4910578	0.601403	0.46777	0.180829	0.448827
665	0	2808	15426			1.54316e+06	861915	4410207	0.478304	0.349906	0.195436	0.597937
666	0	2888	15426			1818334	993059	4.1371e+06	0.617817	0.439519	0.240037	0.373819
667	0	2968	15426			2272335	1168081	5052268	0.593474	0.449765	0.231199	0.682813
668	0	3048	15426			2468256	1190115	4911995	0.735029	0.502496	0.242288	0.85059
669	0	3128	15426			2.95263e+06	1.56762e+06	5.66129e+06	0.792101	0.521547	0.276902	0.656645
670	0	3208	15426			2.61171e+06	1.49732e+06	4.87677e+06	0.824249	0.535542	0.30703	0.821999
671	0	3288	15426			2.11469e+06	1.08244e+06	4.01196e+06	0.972482	0.527095	0.269804	0.518057
672	0	3368	15426			2.37021e+06	1.02232e+06	4.54646e+06	0.838704	0.521331	0.22486	0.405821
673	0	3448	15426			2676281	1.47362e+06	4.35438e+06	0.903792	0.614619	0.338424	0.725488
674	0	3528	15426			2.40425e+06	1.32988e+06	4.0653e+06	0.97308	0.591408	0.32713	0.546383
675	0	3608	15426			2.82175e+06	1.44512e+06	4.80748e+06	1.06985	0.586951	0.300598	0.847842
676	0	3688	15426			3.07276e+06	1720475	4354751	1.07451	0.70561	0.39508	0.683611
677	0	3768	15426			2.33842e+06	1.2565e+06	3767541	1.2078	0.620675	0.333507	1.15388
678	0	3848	15426			2.07541e+06	1.35793e+06	3.14896e+06	1.43089	0.659077	0.43123	0.466998
679	0	3928	15426			1.89851e+06	1320021	2.66494e+06	1.99785	0.712402	0.495329	0.712992
680	0	4008	15426			2729719	1.50961e+06	3.36597e+06	1.69052	0.810977	0.448492	0.636691
681	0	4088	15426			2.07483e+06	1.17642e+06	2.63663e+06	1.69678	0.786928	0.446182	0.422727
682	0	4168	15426			2240141	1.15665e+06	3268137	1.37971	0.685449	0.353917	0.73651
683	0	4248	15426			1.61148e+06	600647	3.02592e+06	0.98445	0.532559	0.198501	0.419602
684	0	4328	15426			1.72991e+06	924050	3.67784e+06	0.922313	0.470359	0.251248	0.473275
685	0	4408	15426			2.34073e+06	1061722	5723636	0.584555	0.408959	0.185498	0.340478
686	0	4488	15426			2.19915e+06	1.08023e+06	5322828	0.597709	0.413155	0.202943	0.332746
687	0	4568	15426			2.10031e+06	910200	5.17159e+06	0.488977	0.406125	0.176	0.387896
688	0	4648	15426			2.17317e+06	901582	6509428	0.42434	0.333849	0.138504	0.583043
689	0	4728	15426			2.20773e+06	933829	5799384	0.390558	0.380683	0.161022	0.392506
690	0	4808	15426			2.35146e+06	1115940	6.01003e+06	0.373473	0.391256	0.18568	0.397263
691	0	4888	15426			1.96723e+06	714331	5354169	0.432709	0.36742	0.133416	0.328468
692	0	4968	15426			1.89685e+06	841776	5573947	0.388216	0.340307	0.15102	0.359857
693	0	5048	15426			2.09717e+06	1.15701e+06	5.697e+06	0.455746	0.368119	0.203091	0.450687
694	0	5128	15426			2.17682e+06	858391	5867435	0.469273	0.371	0.146298	0.443897
695	0	5208	15426			2150938	968740	5.19121e+06	0.540692	0.414342	0.186611	0.398303
696	0	5288	15426			2367715	1.43819e+06	5.43649e+06	0.759917	0.435523	0.264544	0.584358
697	0	5368	15426			2.75972e+06	1.40576e+06	5437142	0.862363	0.507568	0.258547	0.566618
698	0	5448	15426			2.24164e+06	1.26472e+06	4.00453e+06	1.21198	0.559775	0.315822	0.576529
699	0	5528	15426			2.87366e+06	1.56521e+06	5065163	1.03149	0.567338	0.309014	0.667958
700	0	5608	15426			2149535	1.09046e+06	3689342	1.05521	0.582634	0.295572	0.605586
701	0	5688	15426			2.22439e+06	1.05659e+06	3.46186e+06	1.10298	0.642541	0.305208	0.552424
702	0	5768	15426			2.38579e+06	1.27182e+06	3.80778e+06	1.06779	0.626556	0.334006	0.515397
703	0	5848	15426			3.09797e+06	1.7179e+06	5813569	0.824052	0.532886	0.295499	0.572995
704	0	5928	15426			3.09456e+06	1.57394e+06	5854615	0.696109	0.528568	0.268837	0.576665
705	0	6008	15426			2.08029e+06	999064	4391777	0.590383	0.473679	0.227485	0.323192
706	0	6088	15426			1.72218e+06	838584	4.00059e+06	0.529797	0.43048	0.209615	0.6048
707	0	6168	15426			2.10882e+06	956323	4236664	0.59665	0.497754	0.225726	0.715064
708	0	6248	15426			1.9484e+06	924899	4282979	0.540092	0.454916	0.215948	0.538709
709	0	6328	15426			2526030	1.04484e+06	5126049	0.506226	0.492783	0.203829	0.343614
710	0	6408	15426			2.0752e+06	837926	4.83046e+06	0.456253	0.429607	0.173467	0.495302
711	0	6488	15426			1.65922e+06	870979	4644434	0.454421	0.35725	0.187532	0.502792
712	0	6568	15426			2.21906e+06	1.05956e+06	5.83577e+06	0.470242	0.380251	0.181563	0.508334
713	0	6648	15426			2.0486e+06	818852	5.39436e+06	0.391238	0.379767	0.151798	0.457382
714	0	6728	15426			2.17391e+06	717018	6283464	0.435145	0.345974	0.114112	0.43545
715	0	6808	15426			2.24108e+06	1.03662e+06	5843393	0.400629	0.383524	0.1774	0.501048
716	0	6888	15426			1.94698e+06	630814	5.84925e+06	0.365957	0.332859	0.107845	0.495397
717	0	6968	15426			1840047	665912	5207407	0.358355	0.353352	0.127878	0.501193
718	0	7048	15426			1.44065e+06	504971	4.33482e+06	0.314302	0.332345	0.116492	0.557583
719	0	7128	15426			2.01978e+06	984566	5.87116e+06	0.286246	0.344018	0.167695	0.400726
720	0	7208	15426			2.03622e+06	764942	5.52641e+06	0.288766	0.368452	0.138416	0.278502
721	0	7288	15426			2.20246e+06	884468	6833129	0.258341	0.322321	0.129438	0.42615
722	0	7368	15426			2099312	735052	6951489	0.234154	0.301995	0.10574	0.361039
723	0	7448	15426			1.75092e+06	596251	5.56026e+06	0.260581	0.314898	0.107235	0.33018
724	0	7528	15426			1462183	538860	5.54608e+06	0.210007	0.263643	0.0971606	0.26743
725	0	7608	15426			1.84111e+06	684106	6.9982e+06	0.183317	0.263084	0.0977546	0.352962
726	0	7688	15426			1.52009e+06	534495	5.75728e+06	0.162341	0.264028	0.0928381	0.289141
727	0	7768	15426			1.63642e+06	447215	6736948	0.166413	0.242903	0.0663824	0.254188
728	0	7848	15426			1.65907e+06	556165	7.42322e+06	0.132951	0.223497	0.0749223	0.288693
729	0	7928	15426			1.52793e+06	616244	6.81634e+06	0.134268	0.224157	0.0904069	0.332246
730	0	8008	15426			888091	316015	3.52006e+06	0.122352	0.252294	0.0897752	0.299648
731	0	8088	15426			1275691	508792	5.21435e+06	0.094468	0.24465	0.0975753	0.242373
732	0	8168	15426			896806	314275	3276154	0.11798	0.273737	0.0959281	0.361765
733	0	1288	15346			1.22262e+06	327948	5.25138e+06	0.119207	0.232819	0.0624499	0.249206
734	0	1368	15346			1.01216e+06	416865	5496858	0.171912	0.184134	0.0758369	0.278979
735	0	1448	15346			1.05114e+06	418870	4779004	0.230798	0.21995	0.087648	0.300667
736	0	1528	15346			1.12525e+06	376285	5444401	0.2462	0.20668	0.0691141	0.287591
737	0	1608	15346			1100014	560361	5015577	0.281373	0.21932	0.111724	0.238097
738	0	1688	15346			1.13216e+06	626278	4.16846e+06	0.312106	0.2716	0.150242	0.226122
739	0	1768	15346			1.44473e+06	758357	6.00832e+06	0.357323	0.240454	0.126218	0.25722
740	0	1848	15346			2.1479e+06	788117	6193913	0.480972	0.346776	0.127241	0.430188
741	0	1928	15346			1.73774e+06	652719	4898908	0.486574	0.35472	0.133238	0.464895
742	0	2008	15346			1.88149e+06	709334	6.02038e+06	0.447677	0.31252	0.117822	0.370852
743	0	2088	15346			1.34276e+06	811810	4.5836e+06	0.5016	0.292949	0.177112	0.343311
744	0	2168	15346			1.79084e+06	621915	5050567	0.517092	0.354583	0.123138	0.223718
745	0	2248	15346			2366430	1.03734e+06	6.10632e+06	0.592013	0.387538	0.16988	0.273804
746	0	2328	15346			2.64739e+06	1.03847e+06	6429613	0.569733	0.411749	0.161513	0.374129
747	0	2408	15346			2.01315e+06	1.0597e+06	4749299	0.504863	0.423885	0.223127	0.369141
748	0	2488	15346			1.66161e+06	929527	4335915	0.564458	0.383221	0.214378	0.434042
749	0	2568	15346			1669816	724547	3.7399e+06	0.572117	0.446487	0.193734	0.656474
750	0	2648	15346			2.09851e+06	896885	4974507	0.460684	0.421852	0.180296	0.391149
751	0	2728	15346			2.48361e+06	998341	4.64013e+06	0.917205	0.535247	0.215154	0.506298
752	0	2808	15346			2452775	1.03984e+06	4898783	0.739683	0.500691	0.212265	0.541657
753	0	2888	15346			2.66375e+06	1368302	4.65719e+06	0.811856	0.571966	0.293804	0.407501
754	0	2968	15346			2497695	1.27395e+06	4278695	1.00306	0.583752	0.297743	0.790748
755	0	3048	15346			1.75121e+06	1.10883e+06	3362750	1.2089	0.520766	0.329739	0.89959
756	0	3128	15346			2418797	1247921	3231068	1.49924	0.748606	0.386226	0.585633
757	0	3208	15346			2.45822e+06	1174427	3.55588e+06	1.4434	0.691311	0.330277	0.802678
758	0	3288	15346			2.83946e+06	1.6019e+06	3.86187e+06	1.65901	0.735256	0.4148	0.67686
759	0	3368	15346			2.42351e+06	1.52735e+06	2888716	2.54115	0.838957	0.52873	0.923907
760	0	3448	15346			2.37799e+06	1.38387e+06	2542131	2.48379	0.93543	0.544374	0.600438
761	0	3528	15346			2.04355e+06	1485133	2.48306e+06	2.46769	0.822998	0.598107	1.18106
762	0	3608	15346			2247762	1465754	2.71977e+06	2.45706	0.826454	0.538926	0.804331
763	0	3688	15346			2682072	1.59204e+06	2961238	2.45862	0.905727	0.537627	1.19911
764	0	3768	15346			2685482	1576216	3.08802e+06	2.31363	0.869645	0.510429	0.960485
765	0	3848	15346			3070110	1.8681e+06	2.97984e+06	2.80327	1.03029	0.626911	0.896148
766	0	3928	15346			2.75922e+06	1558129	2.71732e+06	2.93292	1.01542	0.573406	0.844747
767	0	4008	15346			1.6156e+06	1172385	2.02321e+06	3.02839	0.798534	0.579468	0.951807
768	0	4088	15346			1.94739e+06	1.35984e+06	1.91479e+06	3.26495	1.01702	0.710179	0.518004
769	0	4168	15346			2563387	1.51949e+06	3.33049e+06	2.43601	0.769672	0.456235	0.742402
770	0	4248	15346			2.97475e+06	1339267	3.50895e+06	1.62001	0.84776	0.381671	0.77833
771	0	4328	15346			2.15468e+06	1.18769e+06	4.66062e+06	0.857406	0.462316	0.254835	0.447807
772	0	4408	15346			2.31278e+06	1.29765e+06	5298332	0.749168	0.43651	0.244916	0.330809
773	0	4488	15346			1.47881e+06	789224	3927176	0.595689	0.376557	0.200965	0.468862
774	0	4568	15346			1.47476e+06	820137	4.45923e+06	0.460161	0.33072	0.183919	0.368678
775	0	4648	15346			1.89494e+06	851042	5.54769e+06	0.435975	0.341572	0.153405	0.335216
776	0	4728	15346			2.47559e+06	1.18069e+06	7127205	0.429269	0.347343	0.16566	0.393814
777	0	4808	15346			1.95062e+06	851312	5.62629e+06	0.357696	0.346698	0.15131	0.492931
778	0	4888	15346			1.8046e+06	838995	5.33516e+06	0.307451	0.338246	0.157258	0.404318
779	0	4968	15346			1.21169e+06	468603	4318083	0.385434	0.280609	0.108521	0.310798
780	0	5048	15346			1.97999e+06	1.05741e+06	4543418	0.479162	0.435794	0.232734	0.382408
781	0	5128	15346			2.37923e+06	1.10054e+06	6217962	0.514796	0.382638	0.176994	0.574591
782	0	5208	15346			2.37332e+06	1.15718e+06	5842415	0.629387	0.406223	0.198065	0.568188
783	0	5288	15346			2.44304e+06	1.12731e+06	5995226	0.762176	0.407497	0.188035	0.44301
784	0	5368	15346			2642555	1.30191e+06	4.07799e+06	1.26006	0.648005	0.319254	0.492741
785	0	5448	15346			2.19176e+06	1169444	2.44899e+06	1.77697	0.894965	0.477521	0.643663
786	0	5528	15346			2.71086e+06	1.53339e+06	3.21646e+06	2.13538	0.842807	0.476731	0.700239
787	0	5608	15346			3.03132e+06	1.80568e+06	3450688	2.15752	0.878469	0.523281	0.553912
788	0	5688	15346			2946198	1.86669e+06	3.62241e+06	1.73689	0.813326	0.515317	0.808861
789	0	5768	15346			2.94112e+06	1.66836e+06	4.23454e+06	1.29511	0.694553	0.393989	0.704117
790	0	5848	15346			3.02748e+06	1.58307e+06	4.22929e+06	1.21562	0.715836	0.374311	0.688489
791	0	5928	15346			2.44769e+06	1.30288e+06	3.90555e+06	0.86956	0.626721	0.333596	1.18712
792	0	6008	15346			1571898	902487	2.82401e+06	0.911046	0.556619	0.319576	0.573409
793	0	6088	15346			2.30476e+06	1.22413e+06	4.26166e+06	0.801923	0.540814	0.287242	0.747406
794	0	6168	15346			2.28588e+06	1.13532e+06	4.64841e+06	0.665838	0.491756	0.244239	0.412261
795	0	6248	15346			2.35476e+06	916618	4819997	0.571537	0.48854	0.19017	0.545182
796	0	6328	15346			2.08883e+06	983438	4826973	0.557708	0.432741	0.203738	0.677817
797	0	6408	15346			1.96658e+06	833704	4934638	0.475197	0.398525	0.168949	0.408016
798	0	6488	15346			2.17297e+06	998963	4577808	0.574557	0.474675	0.218219	0.599351
799	0	6568	15346			2319248	1.1066e+06	5566514	0.504036	0.416643	0.198796	0.549351
800	0	6648	15346			2.24727e+06	959357	5.90555e+06	0.448578	0.380535	0.16245	0.381104
801	0	6728	15346			2284137	1.11823e+06	5733592	0.439823	0.398378	0.195032	0.447865
802	0	6808	15346			2.14175e+06	976955	5396633	0.458499	0.396867	0.18103	0.502226
803	0	6888	15346			2.30026e+06	871784	6284158	0.472182	0.366041	0.138727	0.380423
804	0	6968	15346			2.17006e+06	826810	6.11138e+06	0.385012	0.355085	0.13529	0.504522
805	0	7048	15346			2.24043e+06	857938	5707498	0.449665	0.392541	0.150318	0.358512
806	0	7128	15346			2184970	958632	5.55067e+06	0.481133	0.393641	0.172706	0.377754
807	0	7208	15346			1.96326e+06	993514	6.28473e+06	0.370847	0.312385	0.158084	0.374102
808	0	7288	15346			2.26885e+06	892444	5856580	0.357336	0.387402	0.152383	0.481281
809	0	7368	15346			2241900	869389	5786444	0.332725	0.38744	0.150246	0.430953
810	0	7448	15346			1.71491e+06	755228	4.94386e+06	0.362453	0.346877	0.152761	0.332139
811	0	7528	15346			1.89265e+06	786131	5.38848e+06	0.315806	0.35124	0.145891	0.454045
812	0	7608	15346			1.53629e+06	647209	5.71845e+06	0.243323	0.268656	0.113179	0.539712
813	0	7688	15346			1.74777e+06	545858	5761811	0.230528	0.303337	0.0947372	0.372766
814	0	7768	15346			1.56805e+06	510648	6.32296e+06	0.201089	0.247993	0.0807608	0.40237
815	0	7848	15346			1.42762e+06	580057	6.23989e+06	0.182448	0.228789	0.0929595	0.379184
816	0	7928	15346			1.41944e+06	493488	5.72152e+06	0.203785	0.248088	0.0862512	0.27593
817	0	8008	15346			1.15616e+06	399072	5.43887e+06	0.143605	0.212574	0.073374	0.20913
818	0	8088	15346			1.07155e+06	381643	5.11189e+06	0.129492	0.209618	0.0746578	0.208768
819	0	8168	15346			1.27769e+06	370346	5.15427e+06	0.112354	0.24789	0.0718523	0.356408
820	0	8248	15346			1.28554e+06	439764	4919758	0.112564	0.261302	0.0893872	0.330743
821	0	1208	15266			1.10104e+06	419402	4534246	0.158473	0.242829	0.0924965	0.256955
822	0	1288	15266			1.09485e+06	342947	4.94454e+06	0.15839	0.221427	0.0693587	0.306329
823	0	1368	15266			1.12593e+06	315967	5.06017e+06	0.220331	0.222507	0.062442	0.22651
824	0	1448	15266			1.03998e+06	374887	4459782	0.308754	0.23319	0.0840595	0.372491
825	0	1528	15266			1.09332e+06	454351	4720762	0.335726	0.231598	0.0962452	0.283068
826	0	1608	15266			1.11378e+06	337795	3.19421e+06	0.378253	0.348687	0.105752	0.376125
827	0	1688	15266			1.81313e+06	681056	5.52566e+06	0.473097	0.328128	0.123253	0.308748
828	0	1768	15266			2.19434e+06	950627	6.28182e+06	0.398943	0.349316	0.15133	0.399831
829	0	1848	15266			1.57084e+06	577948	4977858	0.347921	0.315566	0.116104	0.297439
830	0	1928	15266			1.81868e+06	733042	5084758	0.629397	0.357673	0.144165	0.288806
831	0	2008	15266			1.6971e+06	524753	5098223	0.608111	0.332881	0.102929	0.351763
832	0	2088	15266			1849545	729152	5008952	0.700818	0.369248	0.14557	0.387578
833	0	2168	15266			1.8614e+06	768408	5564700	0.643042	0.334502	0.138086	0.36937
834	0	2248	15266			2175095	983535	5.89077e+06	0.553961	0.369238	0.166962	0.553142
835	0	2328	15266			2.1094e+06	894700	5090679	0.618545	0.414365	0.175753	0.573215
836	0	2408	15266			1.55349e+06	689967	3.88974e+06	0.572757	0.399381	0.177381	0.460071
837	0	2488	15266			1.50693e+06	711469	4106877	0.478491	0.366929	0.173238	0.591339
838	0	2568	15266			2.03428e+06	892053	4468674	0.691977	0.455231	0.199624	0.43922
839	0	2648	15266			2179328	1.09325e+06	4404958	0.850847	0.494744	0.248187	0.613788
840	0	2728	15266			2.54328e+06	1.34475e+06	4448288	1.09893	0.571743	0.302307	0.527626
841	0	2808	15266			2535810	1.38354e+06	4.42249e+06	1.03073	0.57339	0.312841	0.53032
842	0	2888	15266			2.23464e+06	1.20643e+06	3.38603e+06	1.58624	0.659959	0.356298	0.69655
843	0	2968	15266			2592984	1.39927e+06	3.12887e+06	2.07607	0.828729	0.447214	1.00457
844	0	3048	15266			2.73932e+06	1601283	2.86171e+06	2.58969	0.957232	0.559555	1.25543
845	0	3128	15266			2.65851e+06	1.95545e+06	3.20437e+06	2.44095	0.829652	0.610246	0.640292
846	0	3208	15266			3.17129e+06	2.06692e+06	3.34476e+06	2.63628	0.948134	0.617957	1.49538
847	0	3288	15266			3205660	2.01945e+06	3.27313e+06	2.95161	0.979387	0.616978	0.743159
848	0	3368	15266			2.23331e+06	1.50202e+06	3.14473e+06	1.99197	0.710175	0.47763	0.680086
849	0	3448	15266			2591457	1318427	3.25581e+06	2.0548	0.795949	0.404946	0.967834
850	0	3528	15266			2.64066e+06	2.09075e+06	3.68855e+06	2.11607	0.715907	0.566823	0.748118
851	0	3608	15266			2.76926e+06	2.117e+06	4013415	1.7829	0.690001	0.52748	1.01364
852	0	3688	15266			2507001	2.17189e+06	3.50846e+06	1.98385	0.714559	0.619045	0.449742
853	0	3768	15266			2.31662e+06	1.49171e+06	2514696	2.38354	0.921232	0.593198	0.538261
854	0	3848	15266			2.01704e+06	1497186	2.50529e+06	2.24395	0.805114	0.59761	0.765919
855	0	3928	15266			2392606	1570465	2.84973e+06	2.14898	0.83959	0.551092	0.833144
856	0	4008	15266			1.90727e+06	1.40726e+06	2.55018e+06	2.20049	0.747897	0.551829	0.854413
857	0	4088	15266			2.71693e+06	1.87988e+06	3.1609e+06	2.50789	0.859542	0.594727	1.07659
858	0	4168	15266			2.25602e+06	1.37626e+06	2.65632e+06	2.80481	0.849301	0.518106	0.820906
859	0	4248	15266			2.39536e+06	1.46416e+06	2690452	2.87595	0.89032	0.544205	0.688108
860	0	4328	15266			2.80768e+06	1.51808e+06	3.60905e+06	1.80262	0.777954	0.420632	1.03987
861	0	4408	15266			2.28469e+06	1217735	5.55562e+06	0.766568	0.411239	0.21919	0.477837
862	0	4488	15266			1.72695e+06	1.04625e+06	5.29392e+06	0.556328	0.326213	0.197632	0.464798
863	0	4568	15266			2.11374e+06	1.04741e+06	5781601	0.446722	0.365597	0.181163	0.470803
864	0	4648	15266			1.98066e+06	824088	5.04839e+06	0.474995	0.392336	0.163238	0.423962
865	0	4728	15266			1.93902e+06	947074	5.79764e+06	0.478517	0.33445	0.163355	0.547931
866	0	4808	15266			2.19383e+06	1.01992e+06	5829386	0.438289	0.37634	0.174961	0.503649
867	0	4888	15266			2309578	969583	5.96515e+06	0.430453	0.387179	0.162541	0.333151
868	0	4968	15266			2.00288e+06	991775	5528655	0.451518	0.362273	0.179388	0.33746
869	0	5048	15266			2.21548e+06	1087055	5789876	0.485272	0.382647	0.187751	0.239369
870	0	5128	15266			1.7754e+06	999340	5859925	0.52765	0.302973	0.170538	0.462315
871	0	5208	15266			2.08479e+06	1.31931e+06	3.85796e+06	1.00588	0.540386	0.341972	0.50705
872	0	5288	15266			2.28703e+06	1.30866e+06	3335822	1.52213	0.685596	0.392306	0.861538
873	0	5368	15266			2.60352e+06	1.73293e+06	3.0983e+06	2.18266	0.840304	0.559316	0.692508
874	0	5448	15266			2176011	1.1573e+06	1.81281e+06	3.35216	1.20035	0.638403	1.1728
875	0	5528	15266			2.16883e+06	1.70003e+06	2.87221e+06	2.33594	0.755108	0.59189	0.877944
876	0	5608	15266			2.27006e+06	1473748	1.93545e+06	3.19225	1.17289	0.76145	0.977531
877	0	5688	15266			2.06813e+06	1.26118e+06	2.34315e+06	2.57077	0.88263	0.538241	0.686462
878	0	5768	15266			1979791	1.37882e+06	3.25905e+06	1.71346	0.607474	0.423075	0.589671
879	0	5848	15266			2.90512e+06	1.65173e+06	4.17067e+06	1.37172	0.696559	0.396036	0.594068
880	0	5928	15266			2.00204e+06	1.06297e+06	3197944	1.0774	0.62604	0.332392	0.924346
881	0	6008	15266			1.99563e+06	1.19382e+06	3239213	1.11411	0.616083	0.368552	0.703547
882	0	6088	15266			2.40679e+06	1.48613e+06	4.17763e+06	1.16678	0.576114	0.355735	0.564746
883	0	6168	15266			2.37139e+06	1.09843e+06	3.92556e+06	0.981637	0.60409	0.279815	0.793493
884	0	6248	15266			2.1e+06	932059	3.70132e+06	0.96217	0.567364	0.251818	0.693916
885	0	6328	15266			2465919	1.33437e+06	4708244	0.708296	0.523745	0.283412	0.71575
886	0	6408	15266			2.43159e+06	1204189	4783355	0.708813	0.508345	0.251746	0.580493
887	0	6488	15266			2204094	910266	4865511	0.628079	0.453004	0.187085	0.425838
888	0	6568	15266			2.006e+06	880302	4800752	0.564134	0.417851	0.183367	0.611519
889	0	6648	15266			2.41318e+06	761215	5.60331e+06	0.52057	0.43067	0.135851	0.433769
890	0	6728	15266			2173826	896840	5.16055e+06	0.550663	0.42124	0.173788	0.521133
891	0	6808	15266			2.51771e+06	1.1179e+06	5.43926e+06	0.674312	0.462877	0.205523	0.539412
892	0	6888	15266			2.03913e+06	1.04481e+06	6105842	0.435016	0.333964	0.171116	0.481175
893	0	6968	15266			1.96582e+06	816272	5717315	0.463874	0.343836	0.142772	0.467472
894	0	7048	15266			1.80707e+06	851573	5474561	0.433873	0.330084	0.155551	0.414511
895	0	7128	15266			1.52902e+06	590650	4573884	0.434833	0.334294	0.129135	0.411072
896	0	7208	15266			1.85003e+06	807236	4.84057e+06	0.362424	0.382193	0.166765	0.596541
897	0	7288	15266			2.26113e+06	898373	6515340	0.389975	0.347047	0.137886	0.406444
898	0	7368	15266			1.97125e+06	948501	5.8845e+06	0.355783	0.334989	0.161186	0.42183
899	0	7448	15266			1.86759e+06	784148	5406109	0.34212	0.345459	0.145048	0.354774
900	0	7528	15266			1.97496e+06	886915	5.70031e+06	0.29118	0.346466	0.155591	0.47206
901	0	7608	15266			1.65178e+06	595146	4.96557e+06	0.391814	0.332647	0.119855	0.358725
902	0	7688	15266			1545868	803439	5.7264e+06	0.311123	0.269954	0.140304	0.395154
903	0	7768	15266			1.95243e+06	757262	6.77795e+06	0.264865	0.288057	0.111724	0.406384
904	0	7848	15266			1.67678e+06	734420	7.70993e+06	0.232138	0.217483	0.0952564	0.224039
905	0	7928	15266			1.36476e+06	596964	6.17049e+06	0.231092	0.221175	0.0967449	0.376683
906	0	8008	15266			1198744	442135	5.46221e+06	0.204834	0.219461	0.0809443	0.239101
907	0	8088	15266			1.27025e+06	447893	6.16198e+06	0.189988	0.206143	0.0726865	0.439406
908	0	8168	15266			1013689	199292	5.76615e+06	0.168569	0.1758	0.0345624	0.221595
909	0	8248	15266			1.1409e+06	500823	6.25866e+06	0.132023	0.182292	0.0800209	0.254555
910	0	8328	15266			1.40633e+06	348849	6140531	0.123802	0.229025	0.0568109	0.354743
911	0	8408	15266			1.05754e+06	361984	4.34584e+06	0.0941636	0.243345	0.0832945	0.322218
912	0	1208	15186			1.01325e+06	333663	5081696	0.196878	0.199392	0.0656599	0.297282
913	0	1288	15186			877196	240624	3.86575e+06	0.145631	0.226915	0.0622451	0.200991
914	0	1368	15186			919946	371204	4972177	0.242975	0.185019	0.0746563	0.335654
915	0	1448	15186			1449167	452783	3.90301e+06	0.406428	0.371295	0.116009	0.460498
916	0	1528	15186			1.50064e+06	392472	4.11016e+06	0.441415	0.365105	0.0954882	0.295693
917	0	1608	15186			1.23669e+06	393187	5.03394e+06	0.372548	0.245669	0.0781071	0.332895
918	0	1688	15186			1.79742e+06	598801	5605436	0.42966	0.320656	0.106825	0.427413
919	0	1768	15186			1945622	873802	6.65554e+06	0.382681	0.292331	0.13129	0.479701
920	0	1848	15186			1.91202e+06	615517	5.43851e+06	0.546119	0.351571	0.113177	0.316984
921	0	1928	15186			1.49057e+06	545170	4.78412e+06	0.493976	0.311566	0.113954	0.289475
922	0	2008	15186			2387653	745130	6065719	0.641869	0.393631	0.122843	0.385764
923	0	2088	15186			2453501	1.02026e+06	6148803	0.666506	0.399021	0.165929	0.447022
924	0	2168	15186			2.29055e+06	975904	5.65918e+06	0.683955	0.40475	0.172446	0.391519
925	0	2248	15186			2.34537e+06	1169373	6.192e+06	0.696126	0.378774	0.188852	0.562208
926	0	2328	15186			1.85481e+06	1.00713e+06	4830965	0.628876	0.383942	0.208474	0.64985
927	0	2408	15186			2.00028e+06	871116	5050925	0.687205	0.396022	0.172467	0.60527
928	0	2488	15186			2.34991e+06	1.25772e+06	4265404	0.948123	0.550924	0.294866	0.68138
929	0	2568	15186			2.35398e+06	1.16417e+06	4027535	1.08523	0.584471	0.289052	0.686192
930	0	2648	15186			2672510	1.84497e+06	4381267	1.40597	0.609986	0.421103	0.539418
931	0	2728	15186			2434749	1.62337e+06	2.65429e+06	2.67888	0.917287	0.611602	0.874722
932	0	2808	15186			2750777	1.73661e+06	3417747	2.19682	0.804851	0.508116	0.627884
933	0	2888	15186			2.31987e+06	1.53559e+06	2616444	2.51507	0.88665	0.586899	0.846622
934	0	2968	15186			2.08347e+06	1.59175e+06	2.14078e+06	2.89678	0.973227	0.743536	0.374072
935	0	3048	15186			2.44287e+06	1.78002e+06	3.1834e+06	2.18807	0.76738	0.559157	0.491199
936	0	3128	15186			2.34584e+06	1.81934e+06	3.05668e+06	2.20331	0.767446	0.595202	0.666035
937	0	3208	15186			2.15077e+06	1.75034e+06	3.28972e+06	2.11553	0.653786	0.532062	1.00185
938	0	3288	15186			2.85139e+06	2010415	3.92834e+06	1.76007	0.72585	0.511772	0.777906
939	0	3368	15186			2525672	1.66908e+06	3.00826e+06	2.14565	0.839579	0.554833	0.662294
940	0	3448	15186			2.74365e+06	1.847e+06	3366838	1.99383	0.814905	0.548587	0.938922
941	0	3528	15186			2.75453e+06	1936714	3.67397e+06	1.93603	0.749741	0.527144	0.896714
942	0	3608	15186			2.54089e+06	1.79168e+06	3.68005e+06	1.52816	0.690449	0.486862	1.1614
943	0	3688	15186			2.36776e+06	1.54516e+06	3.72221e+06	1.44263	0.636116	0.41512	0.715046
944	0	3768	15186			2.77842e+06	2.08609e+06	4.20459e+06	1.67871	0.660806	0.496147	1.11627
945	0	3848	15186			2463418	1.57214e+06	3.30671e+06	1.56222	0.744975	0.475439	0.941168
946	0	3928	15186			2.0447e+06	1.15225e+06	2885616	1.63662	0.708584	0.399309	1.13624
947	0	4008	15186			2.33565e+06	1.80343e+06	3.13976e+06	2.07118	0.743895	0.574386	0.634206
948	0	4088	15186			2176200	1.43486e+06	2.94594e+06	2.11592	0.73871	0.487062	0.63717
949	0	4168	15186			1.78515e+06	981437	2.25469e+06	2.04093	0.791752	0.435288	1.03604
950	0	4248	15186			1.68473e+06	944454	2.19139e+06	2.17865	0.768794	0.430984	0.579668
951	0	4328	15186			1.65456e+06	1.15066e+06	2.1165e+06	2.46411	0.781742	0.54366	0.595843
952	0	4408	15186			1.52371e+06	1.24472e+06	2.03447e+06	2.58899	0.748945	0.611813	0.439568
953	0	4488	15186			954970	568380	1898498	1.24055	0.503013	0.299384	0.376157
954	0	4568	15186			1.59809e+06	974077	4863242	0.580346	0.328606	0.200294	0.426436
955	0	4648	15186			1.65084e+06	873377	4372460	0.480844	0.377554	0.199745	0.369045
956	0	4728	15186			1.96536e+06	1.17505e+06	4.73223e+06	0.48692	0.415315	0.248308	0.652877
957	0	4808	15186			2.19684e+06	1177024	5012736	0.530811	0.438252	0.234807	0.599486
958	0	4888	15186			2003469	1.07431e+06	5721430	0.567156	0.350169	0.18777	0.452478
959	0	4968	15186			1.94154e+06	1.07082e+06	6.01601e+06	0.552593	0.322728	0.177996	0.470375
960	0	5048	15186			2.00851e+06	1.08842e+06	5.61853e+06	0.614452	0.357479	0.19372	0.503707
961	0	5128	15186			2.56544e+06	1.46673e+06	3824210	1.80107	0.670842	0.383538	0.558423
962	0	5208	15186			2.48831e+06	1.24893e+06	3.15134e+06	2.12457	0.789604	0.396317	0.97955
963	0	5288	15186			1.93609e+06	1.25592e+06	2.93467e+06	2.24238	0.65973	0.427959	0.400512
964	0	5368	15186			2.09489e+06	1470711	2.64633e+06	2.45956	0.791621	0.555755	1.04887
965	0	5448	15186			2771525	1.70286e+06	3.57783e+06	2.32035	0.774638	0.475948	0.97853
966	0	5528	15186			2.3838e+06	1.84841e+06	3.15699e+06	2.32846	0.755088	0.585497	0.700457
967	0	5608	15186			2.63177e+06	1.74103e+06	3458182	1.81822	0.761026	0.503454	0.932359
968	0	5688	15186			1.94181e+06	1.42778e+06	2.62939e+06	1.95797	0.738502	0.543009	0.987032
969	0	5768	15186			2.39508e+06	1.75317e+06	3.51818e+06	1.71003	0.680773	0.498319	0.721032
970	0	5848	15186			2.37456e+06	1.58233e+06	2.87161e+06	2.18969	0.826911	0.551026	0.729747
971	0	5928	15186			1.97993e+06	1467795	2.46773e+06	2.01662	0.802327	0.594795	2.02266
972	0	6008	15186			2.37732e+06	1.78497e+06	2.81365e+06	2.14061	0.844924	0.634397	0.831373
973	0	6088	15186			2.06379e+06	1.34014e+06	3.01456e+06	1.87756	0.684606	0.444554	0.521697
974	0	6168	15186			2428963	1.11193e+06	3.36379e+06	1.21289	0.72209	0.330558	0.649568
975	0	6248	15186			2.18594e+06	831372	2962306	1.16062	0.737917	0.28065	0.464637
976	0	6328	15186			1.88073e+06	993530	3.46053e+06	1.12966	0.543479	0.287103	0.522131
977	0	6408	15186			2544108	1.23159e+06	4.64941e+06	1.04385	0.54719	0.264891	0.515037
978	0	6488	15186			2.2649e+06	1.05199e+06	3.88815e+06	0.953294	0.582514	0.270563	0.714708
979	0	6568	15186			2.42112e+06	1.02528e+06	4671357	0.858823	0.51829	0.219482	0.49484
980	0	6648	15186			2.59247e+06	1.25271e+06	5466353	0.5618	0.47426	0.229167	0.471601
981	0	6728	15186			2229434	898018	5247579	0.612539	0.42485	0.17113	0.461532
982	0	6808	15186			2.46463e+06	844500	5137752	0.652577	0.479709	0.164371	0.591087
983	0	6888	15186			2.19349e+06	1154797	5.67191e+06	0.516626	0.386729	0.203599	0.499691
984	0	6968	15186			2324048	1019025	5461621	0.467953	0.425523	0.186579	0.672399
985	0	7048	15186			2.05887e+06	876178	5480323	0.551735	0.375685	0.159877	0.468815
986	0	7128	15186			1.8015e+06	740514	4565239	0.52741	0.394613	0.162207	0.415615
987	0	7208	15186			1583331	757708	4.03206e+06	0.507681	0.392685	0.187921	0.368173
988	0	7288	15186			1.95861e+06	642915	5177137	0.475948	0.378319	0.124184	0.356549
989	0	7368	15186			1.91717e+06	934205	5588250	0.418451	0.343072	0.167173	0.485538
990	0	7448	15186			1862982	788928	5859213	0.404574	0.317958	0.134647	0.470922
991	0	7528	15186			1.90566e+06	711299	5025033	0.332604	0.379234	0.141551	0.26842
992	0	7608	15186			2.00955e+06	741822	5.74863e+06	0.409317	0.34957	0.129043	0.523405
993	0	7688	15186			1.66731e+06	675795	5366693	0.33831	0.310678	0.125924	0.3274
994	0	7768	15186			1.81681e+06	764205	5.8589e+06	0.327795	0.310094	0.130435	0.432301
995	0	7848	15186			1.9264e+06	643027	6365276	0.324019	0.302642	0.101021	0.460454
996	0	7928	15186			2.01611e+06	718436	7178493	0.3519	0.280854	0.100082	0.35557
997	0	8008	15186			1.64284e+06	636441	6260427	0.32047	0.262417	0.101661	0.294705
998	0	8088	15186			1.41924e+06	621871	6510353	0.244912	0.217998	0.0955203	0.283671
999	0	8168	15186			1.33203e+06	381961	6920005	0.214301	0.19249	0.0551967	0.326258
1000	0	8248	15186			1.33419e+06	471712	6.42898e+06	0.210316	0.207527	0.0733727	0.342274
1001	0	8328	15186			1406752	525521	6996973	0.142511	0.201052	0.0751069	0.322318
1002	0	8408	15186			1.36143e+06	412588	6374412	0.127036	0.213577	0.0647257	0.250768
1003	0	8488	15186			825291	252906	3205837	0.1113	0.257434	0.0788892	0.424319
1004	0	1128	15106			595811	190060	3.35713e+06	0.135462	0.177477	0.056614	0.299141
1005	0	1208	15106			738267	208542	3.42358e+06	0.247332	0.215642	0.0609133	0.255351
1006	0	1288	15106			1.32551e+06	427861	5707076	0.252674	0.232258	0.0749702	0.232942
1007	0	1368	15106			1.24887e+06	473701	4938378	0.32821	0.252891	0.0959224	0.369336
1008	0	1448	15106			1.3713e+06	528237	3.89347e+06	0.531404	0.352205	0.135672	0.431854
1009	0	1528	15106			1.24289e+06	424188	3.61223e+06	0.463544	0.34408	0.117431	0.494017
1010	0	1608	15106			1.35899e+06	594237	4.73894e+06	0.382245	0.286771	0.125395	0.371548
1011	0	1688	15106			1.36973e+06	587877	5225621	0.470971	0.262119	0.112499	0.56575
1012	0	1768	15106			1.5785e+06	685074	4476155	0.695324	0.352645	0.15305	0.422202
1013	0	1848	15106			1674694	764200	4835011	0.605361	0.346368	0.158055	0.360313
1014	0	1928	15106			1.81836e+06	912614	5.82867e+06	0.569198	0.311969	0.156573	0.361409
1015	0	2008	15106			1.85397e+06	868089	5.09689e+06	0.671673	0.363746	0.170318	0.476903
1016	0	2088	15106			1274826	642839	3.32397e+06	0.635653	0.383525	0.193395	0.392224
1017	0	2168	15106			2.23454e+06	922023	5481856	0.838036	0.407624	0.168195	0.415571
1018	0	2248	15106			2.79265e+06	1.27559e+06	5295237	0.968385	0.527389	0.240894	0.415538
1019	0	2328	15106			2.70163e+06	1.28478e+06	5.15394e+06	0.979216	0.524188	0.24928	0.55986
1020	0	2408	15106			2.22713e+06	993619	4.2359e+06	1.03878	0.525773	0.234571	0.817306
1021	0	2488	15106			2.55432e+06	1458531	4.1706e+06	1.32195	0.612459	0.349718	0.677774
1022	0	2568	15106			1.98105e+06	1.0378e+06	2.0266e+06	2.7781	0.977527	0.512089	0.606777
1023	0	2648	15106			1.72514e+06	1.15136e+06	2.23156e+06	2.25511	0.773065	0.515941	0.543102
1024	0	2728	15106			2.30412e+06	1.72498e+06	3.15924e+06	2.05311	0.729328	0.54601	0.598331
1025	0	2808	15106			2.32014e+06	1.77506e+06	2.61515e+06	2.46981	0.887191	0.678759	1.14105
1026	0	2888	15106			1995539	1.39894e+06	2.38598e+06	2.29562	0.836361	0.586317	1.17693
1027	0	2968	15106			1.50535e+06	891912	2.18294e+06	1.77189	0.689597	0.408583	1.12244
1028	0	3048	15106			1.39617e+06	764887	2219942	1.49543	0.628922	0.344553	0.731491
1029	0	3128	15106			2.11506e+06	1.36379e+06	1.90916e+06	2.1976	1.10785	0.714339	0.917343
1030	0	3208	15106			2788386	2.22643e+06	3.20279e+06	2.17842	0.870613	0.695155	0.801442
1031	0	3288	15106			3040036	2.39481e+06	3.90755e+06	1.85492	0.777991	0.612868	0.817251
1032	0	3368	15106			1.91047e+06	1.1546e+06	3.47833e+06	1.09822	0.549251	0.331942	0.658745
1033	0	3448	15106			2.35734e+06	1.49718e+06	4.16954e+06	1.18574	0.565373	0.359077	1.19381
1034	0	3528	15106			1.73607e+06	1.2066e+06	4.26889e+06	0.807493	0.40668	0.282651	0.518877
1035	0	3608	15106			1389380	1.00933e+06	4.17245e+06	0.672249	0.332989	0.241903	0.372718
1036	0	3688	15106			1.48899e+06	1.19489e+06	4.39608e+06	0.693016	0.338708	0.271809	0.504531
1037	0	3768	15106			1.39515e+06	923174	3960529	0.726705	0.352263	0.233094	0.470438
1038	0	3848	15106			1.36686e+06	1.05324e+06	3.80972e+06	0.654727	0.358783	0.27646	0.763503
1039	0	3928	15106			1.19091e+06	869253	3519537	0.702298	0.338371	0.246979	0.402365
1040	0	4008	15106			1252702	917678	3.27616e+06	0.834942	0.382369	0.280108	0.564036
1041	0	4088	15106			1.54037e+06	1.09391e+06	3.22701e+06	1.07698	0.477338	0.338985	0.525695
1042	0	4168	15106			1.42227e+06	1.02202e+06	2.20203e+06	1.73782	0.64589	0.464127	0.567512
1043	0	4248	15106			742687	702163	1.53146e+06	1.74637	0.484955	0.458493	0.678096
1044	0	4328	15106			1.4966e+06	1.33379e+06	2452300	2.12162	0.610282	0.543892	0.660685
1045	0	4408	15106			1.64304e+06	1244508	2.15357e+06	2.52007	0.762936	0.577881	0.800192
1046	0	4488	15106			2.08655e+06	1.18421e+06	2.61278e+06	1.90108	0.798596	0.453239	0.345717
1047	0	4568	15106			1.92095e+06	1.38251e+06	3284567	1.53375	0.58484	0.42091	1.04521
1048	0	4648	15106			2109406	1.44674e+06	3563147	1.80726	0.592006	0.406028	0.692819
1049	0	4728	15106			2.14683e+06	1.94383e+06	3.37846e+06	2.0916	0.635448	0.575361	0.776055
1050	0	4808	15106			2.35101e+06	1.73969e+06	3870313	1.6762	0.607447	0.449496	1.02954
1051	0	4888	15106			1.69081e+06	1.36881e+06	3102721	1.89106	0.544944	0.441164	0.650461
1052	0	4968	15106			1.96344e+06	1.7336e+06	3047684	1.95439	0.644241	0.568825	0.742474
1053	0	5048	15106			2133090	1.88735e+06	3.50095e+06	1.94783	0.609289	0.539096	0.839368
1054	0	5128	15106			2.31405e+06	2.04372e+06	3.87617e+06	1.93562	0.596994	0.527253	0.65707
1055	0	5208	15106			2.26682e+06	1.31515e+06	2.96815e+06	2.18547	0.763713	0.443086	0.321212
1056	0	5288	15106			1892007	1.61345e+06	3.10604e+06	2.03696	0.609138	0.519457	0.878787
1057	0	5368	15106			2.00154e+06	1.44748e+06	3111654	2.22765	0.643241	0.46518	0.835903
1058	0	5448	15106			1.94091e+06	1.47099e+06	2.64057e+06	2.44077	0.735034	0.557073	124.799
1059	0	5528	15106			2.56317e+06	2.10009e+06	3560692	2.29304	0.719852	0.589797	0.755998
1060	0	5608	15106			2473386	2197943	3.17449e+06	2.4588	0.779144	0.692377	0.79823
1061	0	5688	15106			1.74872e+06	1.51507e+06	2.72701e+06	1.83772	0.641259	0.555579	1.08723
1062	0	5768	15106			2.3665e+06	1.90302e+06	3.25989e+06	2.06335	0.725946	0.583768	0.710555
1063	0	5848	15106			1.88605e+06	1725503	2.8242e+06	2.21424	0.667816	0.61097	0.767891
1064	0	5928	15106			2.10793e+06	1.68065e+06	2.63408e+06	2.10564	0.800254	0.638041	0.831079
1065	0	6008	15106			2.51429e+06	1737665	3.2739e+06	1.85627	0.767981	0.530762	1.0323
1066	0	6088	15106			2.21065e+06	1.51125e+06	2945577	2.18407	0.750499	0.513059	0.952876
1067	0	6168	15106			1990967	1.37707e+06	2.36836e+06	2.47134	0.840654	0.581444	1.06642
1068	0	6248	15106			1.76021e+06	1.05339e+06	2.3096e+06	1.9614	0.762125	0.456091	0.635574
1069	0	6328	15106			2037853	921401	2.45198e+06	1.99799	0.831104	0.375778	1.33361
1070	0	6408	15106			2.03544e+06	1064591	2.94042e+06	1.3815	0.692226	0.362054	0.748611
1071	0	6488	15106			2.28533e+06	1.21175e+06	3.15872e+06	1.43061	0.7235	0.383622	0.994963
1072	0	6568	15106			2.59984e+06	1.29113e+06	4406387	1.1558	0.590017	0.293012	0.501604
1073	0	6648	15106			2450072	1.23653e+06	4473407	0.988569	0.547697	0.276418	0.597446
1074	0	6728	15106			2.56765e+06	1.23191e+06	4.88826e+06	0.884536	0.525267	0.252013	0.491478
1075	0	6808	15106			2419168	1.01198e+06	4.73973e+06	0.812013	0.510402	0.21351	0.512294
1076	0	6888	15106			2159422	1.08839e+06	5154103	0.69009	0.418971	0.21117	0.453269
1077	0	6968	15106			2.59489e+06	1.20149e+06	5.77089e+06	0.694945	0.449651	0.208199	0.43794
1078	0	7048	15106			2.16461e+06	961582	5.44879e+06	0.622973	0.397264	0.176476	0.47766
1079	0	7128	15106			2.20784e+06	1085034	5027323	0.628584	0.439169	0.215827	0.447638
1080	0	7208	15106			1.86919e+06	987220	4721024	0.6261	0.395928	0.209111	0.582821
1081	0	7288	15106			1.51552e+06	847725	4.26999e+06	0.53115	0.354924	0.198531	0.460818
1082	0	7368	15106			2.06422e+06	716949	5266667	0.455729	0.391941	0.13613	0.276125
1083	0	7448	15106			1491651	528033	3.93657e+06	0.427639	0.378922	0.134135	0.430627
1084	0	7528	15106			1.4695e+06	760005	4957321	0.399954	0.296431	0.15331	0.182897
1085	0	7608	15106			1.83158e+06	716304	5.69786e+06	0.346052	0.321451	0.125715	0.302622
1086	0	7688	15106			1.62446e+06	654077	5.45577e+06	0.366865	0.297751	0.119887	0.222291
1087	0	7768	15106			1.69401e+06	554140	4.69564e+06	0.440903	0.360763	0.118012	0.00257369
1088	0	7848	15106			2.16627e+06	727618	5.24445e+06	0.574771	0.413059	0.138741	0.55005
1089	0	7928	15106			1.78861e+06	584379	6.08652e+06	0.402461	0.293865	0.096012	0.273988
1090	0	8008	15106			1.35904e+06	604950	6142053	0.373152	0.221269	0.0984932	0.338029
1091	0	8088	15106			1.46153e+06	470411	5684077	0.333037	0.257127	0.0827595	0.329571
1092	0	8168	15106			1.69994e+06	416751	6834656	0.297152	0.248723	0.0609761	0.261308
1093	0	8248	15106			1107711	428725	5449151	0.258995	0.203281	0.0786774	0.379201
1094	0	8328	15106			1.15697e+06	400280	5061039	0.205247	0.228604	0.0790906	0.211518
1095	0	8408	15106			1.445e+06	415471	6203793	0.165838	0.232921	0.0669704	0.239063
1096	0	8488	15106			1.09321e+06	306821	5611058	0.0963	0.194831	0.0546815	0.345454
1097	0	8568	15106			1.11626e+06	342176	4.78159e+06	0.0860554	0.233449	0.0715611	0.357625
1098	0	8648	15106			307249	95384.2	1067467	0.0910852	0.28783	0.0893556	0.31231
1099	0	1048	15026			826750	155900	3.40029e+06	0.161409	0.243141	0.045849	0.00318457
1100	0	1128	15026			892882	256124	3.43215e+06	0.266751	0.260152	0.0746248	0.310295
1101	0	1208	15026			909642	402261	5.01229e+06	0.225286	0.181482	0.080255	0.344028
1102	0	1288	15026			1.27228e+06	485691	5234643	0.291589	0.24305	0.092784	0.286072
1103	0	1368	15026			1.37252e+06	361677	4.90666e+06	0.316898	0.279726	0.0737113	0.183856
1104	0	1448	15026			1.28103e+06	524365	4.79779e+06	0.434031	0.267005	0.109293	0.336552
1105	0	1528	15026			1.34282e+06	576872	4.15069e+06	0.436117	0.323519	0.138982	0.496003
1106	0	1608	15026			1.11486e+06	700228	3.36247e+06	0.720154	0.33156	0.208248	0.488726
1107	0	1688	15026			1.48063e+06	615989	4231313	0.679783	0.349923	0.145579	0.39604
1108	0	1768	15026			1.56991e+06	919550	5.03681e+06	0.641606	0.311687	0.182566	0.448236
1109	0	1848	15026			2.16567e+06	674442	5321041	0.527469	0.407001	0.12675	0.28969
1110	0	1928	15026			2395322	1.01851e+06	5673813	0.677154	0.422171	0.179511	0.331002
1111	0	2008	15026			1.99004e+06	958583	4622097	0.775584	0.43055	0.207391	0.586895
1112	0	2088	15026			2.27669e+06	1.05887e+06	5237907	0.831243	0.434656	0.202156	0.406547
1113	0	2168	15026			2.26835e+06	1.03335e+06	4.90822e+06	1.09537	0.462154	0.210534	0.617262
1114	0	2248	15026			2.36123e+06	1.30779e+06	4482259	1.16081	0.526795	0.29177	0.544213
1115	0	2328	15026			3.12358e+06	1.47447e+06	4508501	1.44154	0.692819	0.327043	0.674131
1116	0	2408	15026			2.50493e+06	1.37759e+06	3276644	2.09406	0.764479	0.420426	0.628069
1117	0	2488	15026			2.05741e+06	1.22052e+06	2.33722e+06	2.58446	0.880281	0.52221	0.685602
1118	0	2568	15026			836337	658004	1.00598e+06	2.70722	0.831362	0.65409	0.587994
1119	0	2648	15026			211821	170713	290552	2.66447	0.729032	0.587548	1.63441
1120	0	2728	15026			924289	536660	1126852	1.94236	0.82024	0.476247	0.68465
1121	0	2808	15026			907148	520914	1.21925e+06	1.58049	0.744021	0.427241	1.06101
1122	0	2888	15026			828597	566226	1.26376e+06	1.55801	0.655662	0.448049	0.797958
1123	0	2968	15026			1.00586e+06	594494	1.55914e+06	1.43777	0.645138	0.381295	0.858089
1124	0	3048	15026			1713522	917198	1.45887e+06	2.40481	1.17456	0.628706	1.62053
1125	0	3128	15026			2.33892e+06	1759284	3.39977e+06	1.76559	0.687963	0.517472	0.703561
1126	0	3208	15026			1.97305e+06	1388381	5.00722e+06	0.865481	0.394041	0.277276	0.742982
1127	0	3288	15026			2.05109e+06	1.48317e+06	5256062	0.725327	0.390234	0.282183	0.569263
1128	0	3368	15026			906038	632526	2410840	0.810346	0.375819	0.262367	0.66808
1129	0	3448	15026			1.70372e+06	867361	3909610	0.680766	0.435779	0.221853	0.845344
1130	0	3528	15026			1.55844e+06	1.02133e+06	3.23509e+06	0.894216	0.481728	0.315705	0.512389
1131	0	3608	15026			1.14812e+06	625011	2.48016e+06	0.813862	0.46292	0.252004	0.455239
1132	0	3688	15026			910939	643114	2223085	0.917576	0.409763	0.289289	0.771763
1133	0	3768	15026			992491	543313	2.03455e+06	0.896378	0.487818	0.267043	0.615569
1134	0	3848	15026			281533	149253	507245	1.06364	0.555024	0.294242	0.674878
1135	0	3928	15026			343491	133159	684952	0.789214	0.501481	0.194406	0.517923
1136	0	4008	15026			698058	418915	1526515	0.896468	0.457289	0.274426	0.474882
1137	0	4088	15026			425945	159269	749227	0.994389	0.568513	0.212578	0.58117
1138	0	4168	15026			495098	308643	1.15609e+06	0.847351	0.428254	0.266972	0.561114
1139	0	4248	15026			556900	391203	1.29239e+06	0.957086	0.430906	0.302697	0.737116
1140	0	4328	15026			1.63039e+06	833363	2.93347e+06	1.10334	0.555787	0.284088	0.730267
1141	0	4408	15026			1.6601e+06	1.18456e+06	2176623	1.92551	0.762696	0.544218	0.736276
1142	0	4488	15026			1.3557e+06	1.12065e+06	1746446	2.33741	0.776264	0.641677	0.859545
1143	0	4568	15026			1.71054e+06	1.39741e+06	2.60827e+06	2.10652	0.655812	0.535762	0.668488
1144	0	4648	15026			1.81102e+06	1.74703e+06	2.69056e+06	2.10733	0.673102	0.649319	0.823271
1145	0	4728	15026			2.05879e+06	1.68863e+06	2935437	1.97782	0.701356	0.575256	0.860266
1146	0	4808	15026			2.01469e+06	1.75547e+06	2415993	2.54966	0.833896	0.726604	0.543813
1147	0	4888	15026			2.0214e+06	1.98274e+06	2504388	2.8515	0.807145	0.791708	0.593997
1148	0	4968	15026			1.85326e+06	1.39962e+06	2792650	1.95124	0.66362	0.501179	0.898
1149	0	5048	15026			1.94043e+06	1.58951e+06	3.34148e+06	2.09365	0.580708	0.475691	0.00409874
1150	0	5128	15026			2464760	1.91015e+06	3145653	2.33856	0.783545	0.607234	0.638463
1151	0	5208	15026			2375801	2.28649e+06	3.4031e+06	2.31847	0.698129	0.671886	1.00302
1152	0	5288	15026			2.22423e+06	1.77584e+06	3.25451e+06	2.20978	0.683431	0.545654	0.665554
1153	0	5368	15026			2.64693e+06	1.74934e+06	3.1333e+06	2.09173	0.844774	0.558308	0.693524
1154	0	5448	15026			2.22231e+06	1.75799e+06	2969918	2.1077	0.748272	0.591933	0.742917
1155	0	5528	15026			1.98317e+06	1.44883e+06	2.37795e+06	2.30684	0.833982	0.609278	0.547195
1156	0	5608	15026			2.99353e+06	1.98919e+06	2.49439e+06	2.57283	1.20011	0.797464	1.1903
1157	0	5688	15026			2.85627e+06	2.13735e+06	3.25215e+06	2.26692	0.878272	0.657211	1.13158
1158	0	5768	15026			3105410	2.60562e+06	2.74483e+06	2.66486	1.13137	0.949283	1.13329
1159	0	5848	15026			1.62474e+06	1161229	2318272	1.56265	0.700842	0.500903	0.556269
1160	0	5928	15026			1.69158e+06	991409	2.07938e+06	1.86552	0.813501	0.476781	0.618565
1161	0	6008	15026			1.78955e+06	965105	2.22765e+06	1.78573	0.803336	0.433239	0.656836
1162	0	6088	15026			2.09598e+06	1.29062e+06	2.62969e+06	2.21114	0.797047	0.490788	0.578688
1163	0	6168	15026			1630386	1.11243e+06	1.96843e+06	1.98417	0.828266	0.565136	0.933373
1164	0	6248	15026			1.73109e+06	1.25084e+06	2238561	2.39283	0.773303	0.558771	0.77897
1165	0	6328	15026			2120201	1.29105e+06	2.21564e+06	2.51446	0.956925	0.582697	0.872119
1166	0	6408	15026			1.76391e+06	1293853	2.49902e+06	2.02742	0.705842	0.517744	0.837936
1167	0	6488	15026			2.20321e+06	1338786	2.53448e+06	2.68741	0.869296	0.52823	0.919915
1168	0	6568	15026			2416493	1.49099e+06	3258100	2.04361	0.741688	0.457626	0.763901
1169	0	6648	15026			2204771	1.28375e+06	3.83532e+06	1.35406	0.57486	0.334717	0.740576
1170	0	6728	15026			2.50211e+06	1.18882e+06	3.9826e+06	1.27989	0.628261	0.298505	0.73987
1171	0	6808	15026			2.60436e+06	1.06329e+06	4264234	1.06268	0.610745	0.24935	0.829885
1172	0	6888	15026			2790935	1.20018e+06	4.46112e+06	1.05513	0.625613	0.269031	0.464659
1173	0	6968	15026			3.1415e+06	1.46981e+06	5.06402e+06	0.999219	0.620356	0.290247	0.584638
1174	0	7048	15026			2.40628e+06	1.28511e+06	5429484	0.936453	0.443188	0.236691	0.749126
1175	0	7128	15026			2210943	1.11283e+06	5360575	0.731769	0.412445	0.207594	0.538952
1176	0	7208	15026			2.52297e+06	1.0809e+06	5267911	0.774589	0.478931	0.205186	0.528569
1177	0	7288	15026			1573781	660344	3.58143e+06	0.628658	0.439428	0.18438	0.605195
1178	0	7368	15026			1.73212e+06	741659	5055859	0.482686	0.342597	0.146693	0.461834
1179	0	7448	15026			1.64714e+06	771011	4453026	0.508091	0.369892	0.173143	0.358305
1180	0	7528	15026			1823396	877681	5.2105e+06	0.53636	0.349946	0.168445	0.345669
1181	0	7608	15026			1.64722e+06	679412	5694483	0.468806	0.289265	0.119311	0.268568
1182	0	7688	15026			1.53401e+06	651020	4.75714e+06	0.533471	0.322464	0.136851	0.402591
1183	0	7768	15026			1.802e+06	832275	5.03335e+06	0.41496	0.358012	0.165352	0.288341
1184	0	7848	15026			1.62736e+06	692819	5.64323e+06	0.505875	0.288374	0.12277	0.492195
1185	0	7928	15026			1.63195e+06	664489	4816177	0.515863	0.338848	0.13797	0.375473
1186	0	8008	15026			1.22313e+06	534798	4.6359e+06	0.420017	0.263838	0.11536	0.351456
1187	0	8088	15026			1.35167e+06	569196	4.80706e+06	0.427156	0.281185	0.118408	0.342612
1188	0	8168	15026			1.577e+06	487357	5057856	0.406636	0.311793	0.0963565	0.254343
1189	0	8248	15026			1.34635e+06	510252	5088628	0.374952	0.26458	0.100273	0.261211
1190	0	8328	15026			1.08785e+06	527906	5.67265e+06	0.291629	0.19177	0.0930617	0.284638
1191	0	8408	15026			980726	434000	4559122	0.293581	0.215113	0.0951937	0.255231
1192	0	8488	15026			1.09974e+06	432263	6.31164e+06	0.16341	0.174241	0.0684866	0.168952
1193	0	8568	15026			1.33419e+06	559279	6950177	0.145259	0.191965	0.0804697	0.378413
1194	0	8648	15026			1.08424e+06	376872	4300284	0.0908129	0.252133	0.0876389	0.638844
1195	0	8728	15026			342827	112133	1.17429e+06	0.19199	0.291943	0.0954899	0.0202969
1196	0	8808	15026			322230	182355	1.2872e+06	0.228695	0.250334	0.141668	0.95178
1197	0	968	14946			218417	2415.52	1.25524e+06	0.229113	0.174005	0.00192435	0.00778701
1198	0	1048	14946			678023	209894	2.87937e+06	0.205062	0.235476	0.0728956	0.350381
1199	0	1128	14946			1.02771e+06	570538	5635454	0.279254	0.182366	0.101241	0.227024
1200	0	1208	14946			1.25399e+06	375565	4.40311e+06	0.304263	0.284797	0.0852953	0.322001
1201	0	1288	14946			984687	406213	3462565	0.482686	0.284381	0.117316	0.327744
1202	0	1368	14946			1.25088e+06	538524	3.72381e+06	0.425951	0.335913	0.144617	0.447433
1203	0	1448	14946			1.26932e+06	472794	4435180	0.388867	0.286194	0.106601	0.519387
1204	0	1528	14946			1.50875e+06	868533	5296372	0.461391	0.284865	0.163986	0.345112
1205	0	1608	14946			1.8713e+06	730947	5898208	0.584099	0.317265	0.123927	0.350544
1206	0	1688	14946			2202854	828471	5.89314e+06	0.624597	0.373799	0.140582	0.255582
1207	0	1768	14946			1.65745e+06	640199	4.64487e+06	0.806185	0.356835	0.137829	0.386858
1208	0	1848	14946			1.59496e+06	547786	4070573	0.691171	0.391827	0.134572	0.397678
1209	0	1928	14946			1.95812e+06	846958	4.96928e+06	0.787565	0.394046	0.170439	0.51552
1210	0	2008	14946			2.70315e+06	1.3241e+06	5386029	0.95921	0.501882	0.245839	0.622884
1211	0	2088	14946			2.55176e+06	1.13686e+06	4.72826e+06	1.14412	0.539683	0.24044	0.725843
1212	0	2168	14946			2.70461e+06	1.19797e+06	4.36625e+06	1.35107	0.619435	0.274371	0.74478
1213	0	2248	14946			2.76456e+06	1.37284e+06	3602203	2.04167	0.767463	0.381111	0.957685
1214	0	2328	14946			2.46806e+06	1274529	2.94447e+06	2.59709	0.838201	0.432855	1.00132
1215	0	2408	14946			2.82552e+06	1.81094e+06	2.89134e+06	2.69888	0.977236	0.626332	0.678125
1216	0	2488	14946			1.94496e+06	1443583	2454568	2.49486	0.792384	0.588121	1.03061
1217	0	2568	14946			513872	491713	639686	2.25897	0.803319	0.768678	0.669738
1218	0	2648	14946			99768	70034.2	130517	1.83296	0.764407	0.536591	0.811455
1219	0	2728	14946			535979	240370	760471	1.59331	0.704799	0.31608	0.621197
1220	0	2808	14946			711056	434184	1.31292e+06	1.25667	0.541584	0.330701	0.628375
1221	0	2888	14946			1.04118e+06	541221	1237277	1.78024	0.841506	0.437429	0.407468
1222	0	2968	14946			2377748	1.64001e+06	2.06687e+06	2.59908	1.15041	0.793475	0.71514
1223	0	3048	14946			2.493e+06	1975456	2722544	2.51066	0.915688	0.725592	1.06999
1224	0	3128	14946			2402230	1.65037e+06	4818992	1.12165	0.498492	0.342471	0.587885
1225	0	3208	14946			1.97702e+06	1.65144e+06	5.44003e+06	0.842539	0.363421	0.303571	0.585539
1226	0	3288	14946			1.89117e+06	1.00975e+06	4.38259e+06	0.711005	0.431519	0.230401	0.570403
1227	0	3368	14946			1.71901e+06	1.34508e+06	4441779	0.90155	0.387009	0.302824	0.709205
1228	0	3448	14946			1.62446e+06	1.32941e+06	3.75263e+06	0.920848	0.432886	0.354261	0.506004
1229	0	3528	14946			1.27032e+06	908956	3.03318e+06	0.805736	0.418806	0.299671	0.576589
1230	0	3608	14946			1.04104e+06	529784	1.98633e+06	0.6701	0.524103	0.266715	0.591798
1231	0	3688	14946			582276	296369	1.0961e+06	0.810705	0.531226	0.270385	0.50836
1232	0	3768	14946			655732	380280	1.30511e+06	0.760618	0.502434	0.291378	0.480863
1233	0	3848	14946			526645	303262	1.00253e+06	0.907558	0.525317	0.302497	0.944259
1234	0	3928	14946			459171	191423	889249	0.707102	0.516358	0.215263	0.720433
1235	0	4008	14946			418801	170888	758343	0.671911	0.552258	0.225345	0.656189
1236	0	4088	14946			1.20754e+06	572763	2.39741e+06	0.58305	0.503687	0.238909	0.824882
1237	0	4168	14946			920385	530281	2.00456e+06	0.69205	0.459145	0.264537	0.688352
1238	0	4248	14946			1.34446e+06	769589	3020921	0.721106	0.445051	0.254753	0.603349
1239	0	4328	14946			1.25162e+06	756033	2.73052e+06	0.673424	0.458382	0.276883	0.725036
1240	0	4408	14946			1.13351e+06	945046	3.6522e+06	0.645995	0.310364	0.25876	0.479174
1241	0	4488	14946			1.5082e+06	801253	3.47452e+06	0.772318	0.434076	0.230608	0.770843
1242	0	4568	14946			1.4895e+06	1.35217e+06	2.53552e+06	1.68703	0.587452	0.533289	0.896681
1243	0	4648	14946			1300981	1.17302e+06	1.58335e+06	2.28802	0.821666	0.740847	0.851752
1244	0	4728	14946			2.23498e+06	1.38029e+06	2.82697e+06	2.12841	0.790594	0.488258	1.11076
1245	0	4808	14946			2.5695e+06	1.67599e+06	3.35681e+06	2.01879	0.76546	0.49928	0.632036
1246	0	4888	14946			2677975	2.0889e+06	3.64848e+06	2.18496	0.733997	0.57254	1.2612
1247	0	4968	14946			2.56135e+06	1.67086e+06	3520075	1.8133	0.72764	0.474665	0.804306
1248	0	5048	14946			2.65756e+06	1.87948e+06	3798892	2.08841	0.699563	0.494745	0.6216
1249	0	5128	14946			1.67982e+06	1.12214e+06	3.03952e+06	1.28265	0.552661	0.369184	1.10157
1250	0	5208	14946			1.95303e+06	1.18464e+06	4.26394e+06	0.876638	0.458034	0.277827	0.683838
1251	0	5288	14946			1.5587e+06	1.00913e+06	3667749	0.875843	0.424976	0.275137	0.795316
1252	0	5368	14946			2.0598e+06	1.26822e+06	4.10999e+06	0.890694	0.501168	0.308569	0.575657
1253	0	5448	14946			2.46093e+06	1.32373e+06	4.67841e+06	0.804058	0.526018	0.282945	1.10235
1254	0	5528	14946			2.5002e+06	1.3447e+06	4.54031e+06	0.951802	0.550667	0.296169	0.454294
1255	0	5608	14946			1.91704e+06	1.56698e+06	2.36499e+06	2.10913	0.810593	0.662575	0.757497
1256	0	5688	14946			2595030	1914601	2709236	2.48349	0.957846	0.706694	1.2808
1257	0	5768	14946			2.34992e+06	1.54752e+06	2.66731e+06	2.07035	0.881006	0.580179	1.11069
1258	0	5848	14946			1.69146e+06	932176	2156983	1.56347	0.784181	0.432167	0.64974
1259	0	5928	14946			1.57714e+06	741851	2.08077e+06	1.20714	0.75796	0.356526	0.593891
1260	0	6008	14946			1.33128e+06	803971	2.11116e+06	1.20571	0.630592	0.380819	0.780951
1261	0	6088	14946			1.21745e+06	682695	1.91292e+06	1.27139	0.636437	0.356886	0.68897
1262	0	6168	14946			1.33194e+06	740256	2.03685e+06	1.50773	0.653919	0.363431	0.870185
1263	0	6248	14946			1.60636e+06	1.32568e+06	2.40626e+06	1.77118	0.667575	0.550929	0.785413
1264	0	6328	14946			2.49496e+06	2.13687e+06	2.99046e+06	2.41471	0.834308	0.714563	0.744398
1265	0	6408	14946			2.49034e+06	2.36242e+06	2.76064e+06	2.96711	0.902087	0.85575	0.774598
1266	0	6488	14946			2325685	1841273	2.63311e+06	2.66654	0.883246	0.699276	0.806253
1267	0	6568	14946			1.69221e+06	1.38884e+06	2.63659e+06	2.0403	0.641817	0.526754	0.970956
1268	0	6648	14946			2.1559e+06	1.3885e+06	2.72494e+06	2.32153	0.791172	0.509551	0.819287
1269	0	6728	14946			2.7699e+06	1.34125e+06	2785574	2.69713	0.994374	0.481498	0.626129
1270	0	6808	14946			2.79561e+06	1.61417e+06	4.1382e+06	1.63628	0.675562	0.390067	0.636367
1271	0	6888	14946			2710632	1.60628e+06	4.57448e+06	1.3773	0.592555	0.351139	0.73326
1272	0	6968	14946			2.35141e+06	1.34702e+06	3.72251e+06	1.42273	0.631673	0.361858	0.663971
1273	0	7048	14946			1.97925e+06	957335	3.59909e+06	1.33706	0.549931	0.265993	0.784885
1274	0	7128	14946			2.37054e+06	1.32192e+06	5.2866e+06	1.00576	0.448406	0.250051	0.378924
1275	0	7208	14946			2.06457e+06	963416	4.27037e+06	0.827137	0.483463	0.225605	0.677311
1276	0	7288	14946			1.94812e+06	1.04955e+06	4.40475e+06	0.640511	0.442277	0.238276	0.493951
1277	0	7368	14946			2.06063e+06	789086	4.92883e+06	0.580982	0.418077	0.160096	0.471905
1278	0	7448	14946			1.95577e+06	852044	5.09576e+06	0.619155	0.383804	0.167206	0.587115
1279	0	7528	14946			1.47915e+06	755704	4.41083e+06	0.521262	0.335344	0.171329	0.380775
1280	0	7608	14946			2.09977e+06	870347	5.85295e+06	0.62804	0.358753	0.148702	0.697414
1281	0	7688	14946			2499818	1.18598e+06	7.30497e+06	0.535928	0.342208	0.162353	0.310593
1282	0	7768	14946			2.07252e+06	945886	5.74071e+06	0.553568	0.361021	0.164768	0.513178
1283	0	7848	14946			1.85116e+06	732882	6.26473e+06	0.445969	0.29549	0.116985	0.33713
1284	0	7928	14946			1.39078e+06	589224	5.13715e+06	0.494925	0.27073	0.114699	0.380109
1285	0	8008	14946			1.34586e+06	654772	4.6638e+06	0.503086	0.288576	0.140394	0.613954
1286	0	8088	14946			1.29305e+06	477360	4.43072e+06	0.537486	0.291837	0.107739	0.415286
1287	0	8168	14946			1.75817e+06	540937	5725383	0.383369	0.307083	0.0944805	0.324194
1288	0	8248	14946			1.42716e+06	463975	5.72027e+06	0.33457	0.249492	0.0811106	0.334596
1289	0	8328	14946			1.0274e+06	405987	4182600	0.296239	0.245638	0.0970656	0.328305
1290	0	8408	14946			976152	308847	4581271	0.310142	0.213075	0.0674151	0.298191
1291	0	8488	14946			1.00529e+06	287539	4890425	0.227167	0.205564	0.0587963	0.225649
1292	0	8568	14946			1.23817e+06	446528	6184104	0.146248	0.200219	0.0722057	0.235155
1293	0	8648	14946			1.44343e+06	462712	6985809	0.113075	0.206623	0.066236	0.237129
1294	0	8728	14946			1.18974e+06	373549	4.7562e+06	0.108517	0.250146	0.0785395	0.36266
1295	0	8808	14946			492256	198998	1.91496e+06	0.137612	0.257058	0.103918	0.516021
1296	0	8888	14946			199781	2415.52	1.03414e+06	0.111182	0.193184	0.00233577	0.0117754
1297	0	968	14866			564596	198395	2.25148e+06	0.157036	0.250766	0.0881173	0.00292604
1298	0	1048	14866			614830	141372	3.02184e+06	0.192564	0.203462	0.0467835	0.217274
1299	0	1128	14866			1.1948e+06	585580	5.13443e+06	0.268598	0.232703	0.11405	0.274168
1300	0	1208	14866			1.68351e+06	636740	5.54293e+06	0.424038	0.303723	0.114874	0.258801
1301	0	1288	14866			1.67757e+06	473851	4.74423e+06	0.384211	0.353603	0.0998795	0.369053
1302	0	1368	14866			1581235	726952	5.04356e+06	0.510789	0.313516	0.144135	0.385612
1303	0	1448	14866			1.77253e+06	860584	5866257	0.519633	0.302157	0.146701	0.403183
1304	0	1528	14866			1.35727e+06	567428	4.84716e+06	0.546551	0.280014	0.117064	0.443894
1305	0	1608	14866			1.85715e+06	919888	5440535	0.583601	0.341354	0.16908	0.394605
1306	0	1688	14866			2.61068e+06	1.04789e+06	6.72199e+06	0.578749	0.388379	0.15589	0.465147
1307	0	1768	14866			2.54485e+06	1.09552e+06	5.01775e+06	0.851109	0.507169	0.21833	0.578936
1308	0	1848	14866			2.55226e+06	1.03625e+06	5518483	0.792935	0.462493	0.187778	0.387494
1309	0	1928	14866			1.91957e+06	748424	3.73112e+06	1.14509	0.514476	0.200589	0.737
1310	0	2008	14866			2.27318e+06	1.24783e+06	3579444	1.35253	0.635065	0.348611	0.436101
1311	0	2088	14866			2561008	1.30629e+06	3.5806e+06	1.75259	0.715246	0.364825	0.519019
1312	0	2168	14866			2.55469e+06	1175983	2.86262e+06	2.46824	0.892432	0.410807	0.603758
1313	0	2248	14866			2.58199e+06	1.66157e+06	2.64704e+06	3.31248	0.975424	0.62771	1.08263
1314	0	2328	14866			2.48822e+06	1.60332e+06	2711226	2.59454	0.917748	0.591362	0.663435
1315	0	2408	14866			1.9008e+06	1.28044e+06	2.13884e+06	2.45542	0.888704	0.59866	0.780769
1316	0	2488	14866			1.15394e+06	837404	1.1757e+06	2.36365	0.981491	0.712262	1.54095
1317	0	2568	14866			452456	240233	675097	1.54758	0.670209	0.35585	0.623484
1318	0	2648	14866			536380	281572	959545	1.32589	0.558994	0.293443	0.592342
1319	0	2728	14866			647241	345635	979645	1.23203	0.660689	0.352816	0.470934
1320	0	2808	14866			686208	340337	1.01541e+06	1.57265	0.675795	0.335173	0.443467
1321	0	2888	14866			1.75e+06	1.1312e+06	1.46948e+06	2.64162	1.1909	0.769798	1.15141
1322	0	2968	14866			2392171	1.82621e+06	2.68856e+06	2.66363	0.889759	0.679252	1.30419
1323	0	3048	14866			2205234	1.77038e+06	4.27937e+06	1.24122	0.515317	0.413702	0.549489
1324	0	3128	14866			1.99665e+06	1.50398e+06	4.60064e+06	0.82721	0.433993	0.326908	0.769362
1325	0	3208	14866			1842305	1.41859e+06	5.08123e+06	0.789874	0.362571	0.279183	0.435682
1326	0	3288	14866			1.63007e+06	1490249	4.74616e+06	0.782146	0.343449	0.31399	0.56819
1327	0	3368	14866			1297117	864054	2.7508e+06	0.988768	0.471542	0.31411	1.04288
1328	0	3448	14866			1.36852e+06	1.11233e+06	3122455	0.806195	0.438284	0.356234	0.757684
1329	0	3528	14866			2.03073e+06	1.00878e+06	3.76207e+06	0.573661	0.53979	0.268146	0.691226
1330	0	3608	14866			1.23511e+06	505883	2.20058e+06	0.622103	0.561265	0.229886	0.788513
1331	0	3688	14866			213174	99531.5	369508	0.769307	0.576911	0.269362	0.56912
1332	0	3768	14866			292726	110160	517138	0.797021	0.566049	0.213018	0.709653
1333	0	3848	14866			911732	580600	2.01193e+06	0.696714	0.453162	0.288579	0.669782
1334	0	3928	14866			990368	614887	2465845	0.706641	0.401634	0.249362	0.566659
1335	0	4008	14866			1224858	833229	3.58488e+06	0.481867	0.341674	0.232429	0.629605
1336	0	4088	14866			990300	715634	3.2049e+06	0.565238	0.308995	0.223294	0.526937
1337	0	4168	14866			1.38779e+06	757875	4.13265e+06	0.478677	0.335812	0.183387	0.507271
1338	0	4248	14866			1415284	747686	3011518	0.673947	0.469957	0.248275	1.08478
1339	0	4328	14866			1.634e+06	934323	4.08241e+06	0.61033	0.400254	0.228866	0.618743
1340	0	4408	14866			1.48893e+06	920501	4165917	0.633291	0.357407	0.22096	0.531268
1341	0	4488	14866			1.90693e+06	907039	4461202	0.607894	0.427447	0.203317	0.597662
1342	0	4568	14866			1.66998e+06	955166	3.89126e+06	0.574227	0.429162	0.245464	0.729477
1343	0	4648	14866			2.13473e+06	1.1508e+06	4305247	0.780248	0.495843	0.267302	0.646327
1344	0	4728	14866			2132902	1.36007e+06	3269167	1.07685	0.65243	0.41603	0.868311
1345	0	4808	14866			2625949	1.90687e+06	3.94926e+06	1.36175	0.664922	0.482843	0.720062
1346	0	4888	14866			2.37002e+06	1.59469e+06	3878332	1.56506	0.611092	0.411178	0.893737
1347	0	4968	14866			2.38559e+06	1.27176e+06	4652267	0.91236	0.51278	0.273363	0.745284
1348	0	5048	14866			2.12764e+06	1.02923e+06	4213976	0.734202	0.504901	0.244243	0.738308
1349	0	5128	14866			1.7883e+06	1122706	4.17896e+06	0.742428	0.427931	0.268657	0.645333
1350	0	5208	14866			1.75907e+06	1.16772e+06	3.58376e+06	0.850502	0.490847	0.325836	0.804328
1351	0	5288	14866			1.22944e+06	814517	2.43653e+06	1.06835	0.504586	0.334294	0.757426
1352	0	5368	14866			1.9297e+06	998133	3.58582e+06	0.879041	0.538147	0.278356	0.606018
1353	0	5448	14866			2.36755e+06	1.22566e+06	4.4874e+06	0.754074	0.5276	0.273134	0.886366
1354	0	5528	14866			2.22078e+06	1.33907e+06	5.02213e+06	0.871881	0.442199	0.266633	0.850148
1355	0	5608	14866			2500685	1942122	4486125	1.34157	0.557427	0.432917	0.445774
1356	0	5688	14866			2.68223e+06	1.72727e+06	2.95228e+06	2.38264	0.908529	0.585062	0.807668
1357	0	5768	14866			2565625	1.85454e+06	2.95033e+06	2.61051	0.869605	0.628585	0.509784
1358	0	5848	14866			2.72494e+06	2.4454e+06	2.65224e+06	2.73585	1.02741	0.922013	0.881464
1359	0	5928	14866			1.33325e+06	891409	2.02631e+06	1.31975	0.657966	0.439917	0.915987
1360	0	6008	14866			1.18532e+06	727059	1.75082e+06	1.30547	0.677006	0.415267	0.900404
1361	0	6088	14866			2000623	1.43491e+06	2.82513e+06	1.40215	0.708152	0.507908	0.793959
1362	0	6168	14866			1.85172e+06	1.03408e+06	3.11618e+06	1.00424	0.594227	0.331842	0.728404
1363	0	6248	14866			1.43338e+06	737573	2154097	1.06906	0.665418	0.342405	0.930251
1364	0	6328	14866			1.48158e+06	863173	2.01395e+06	1.54878	0.735658	0.428597	0.88547
1365	0	6408	14866			1538632	1.04873e+06	2226765	1.58001	0.690972	0.470967	0.753698
1366	0	6488	14866			2.39517e+06	1.66961e+06	2.25141e+06	2.64919	1.06385	0.741584	0.644146
1367	0	6568	14866			2.14195e+06	1.52813e+06	2.73757e+06	2.2448	0.782427	0.558206	1.1674
1368	0	6648	14866			2118449	1.53674e+06	2705765	2.37111	0.782939	0.56795	1.11231
1369	0	6728	14866			2.06172e+06	1.37598e+06	2.60753e+06	2.28332	0.790677	0.527695	0.447885
1370	0	6808	14866			2.33789e+06	1.58419e+06	2.90921e+06	2.55163	0.803618	0.544544	0.911309
1371	0	6888	14866			2.37201e+06	1.20146e+06	2.85818e+06	2.41214	0.829903	0.420358	0.746071
1372	0	6968	14866			2469725	1.28071e+06	3.04016e+06	2.05286	0.812366	0.421265	0.618854
1373	0	7048	14866			1.98742e+06	1.10545e+06	2963638	1.41959	0.670602	0.373006	0.819432
1374	0	7128	14866			1.96213e+06	1102702	3.53345e+06	1.12601	0.555302	0.312075	0.443348
1375	0	7208	14866			2.26577e+06	946815	3611148	1.26365	0.627438	0.262192	0.468654
1376	0	7288	14866			1.60784e+06	786884	3.2818e+06	0.829496	0.489927	0.239772	0.458142
1377	0	7368	14866			1.92235e+06	969846	4525466	0.793835	0.424786	0.214309	0.555278
1378	0	7448	14866			1.53449e+06	947684	3803337	0.757624	0.403458	0.249172	0.612617
1379	0	7528	14866			1.5162e+06	693247	3.80891e+06	0.75813	0.398068	0.182007	0.424509
1380	0	7608	14866			2.07872e+06	902534	5518730	0.672944	0.376665	0.16354	0.548509
1381	0	7688	14866			2.15506e+06	838113	5240623	0.576835	0.411221	0.159926	0.281832
1382	0	7768	14866			2.17147e+06	793062	5.95612e+06	0.549051	0.364578	0.133151	0.408307
1383	0	7848	14866			1.88593e+06	921856	6.10358e+06	0.590118	0.308988	0.151035	0.441779
1384	0	7928	14866			1596903	660348	4643942	0.608388	0.343868	0.142195	0.441129
1385	0	8008	14866			1.47575e+06	460506	4.05169e+06	0.594771	0.364231	0.113658	0.442504
1386	0	8088	14866			1.28235e+06	590009	4.50591e+06	0.493147	0.284594	0.130941	0.351305
1387	0	8168	14866			1.82628e+06	567588	4.75728e+06	0.491773	0.383892	0.119309	0.326718
1388	0	8248	14866			1.58014e+06	595296	5.65646e+06	0.415482	0.279351	0.105242	0.330942
1389	0	8328	14866			1.29683e+06	491620	5.14297e+06	0.390774	0.252155	0.0955906	0.437917
1390	0	8408	14866			668328	318870	3.00281e+06	0.333488	0.222568	0.106191	0.363839
1391	0	8488	14866			1.32783e+06	442803	5412518	0.250612	0.245325	0.081811	0.310374
1392	0	8568	14866			1.13095e+06	423698	5654713	0.204371	0.200001	0.0749283	0.295568
1393	0	8648	14866			1.1284e+06	396863	6024476	0.178691	0.187303	0.0658751	0.228429
1394	0	8728	14866			1.37539e+06	434677	6090592	0.0913992	0.225822	0.0713686	0.263986
1395	0	8808	14866			1.26237e+06	532549	5.84113e+06	0.100509	0.216117	0.0911723	0.2875
1396	0	8888	14866			362751	87097.2	1.40147e+06	0.208199	0.258836	0.0621471	0.00971822
1397	0	8968	14866			125573	2415.52	389810	0.341853	0.322139	0.00619665	0.0252597
1398	0	9048	14866			2131.24	2415.52	355413	0.00515704	0.00599653	0.00679638	0.95178
1399	0	888	14786			2131.24	2415.52	740313	0.00247582	0.00287884	0.00326283	0.00602469
1400	0	968	14786			539027	262398	2.87335e+06	0.192198	0.187596	0.0913214	0.323969
1401	0	1048	14786			1.04231e+06	390399	4424004	0.22726	0.235603	0.0882456	0.3332
1402	0	1128	14786			1.30847e+06	427642	5.37405e+06	0.355112	0.243479	0.0795753	0.293462
1403	0	1208	14786			1.47873e+06	507946	4912477	0.520561	0.301014	0.103399	0.306005
1404	0	1288	14786			1.5274e+06	650926	3.91304e+06	0.535829	0.390336	0.166348	0.329274
1405	0	1368	14786			1.43865e+06	618637	4164783	0.57016	0.345433	0.14854	0.381089
1406	0	1448	14786			1.86136e+06	758862	4752779	0.650539	0.391636	0.159667	0.4033
1407	0	1528	14786			1.76842e+06	633665	5.16764e+06	0.6286	0.34221	0.122622	0.40535
1408	0	1608	14786			1.93995e+06	1.03741e+06	4644658	0.699902	0.417673	0.223356	0.455654
1409	0	1688	14786			1.81441e+06	780936	3.60789e+06	0.896549	0.502901	0.216452	0.585203
1410	0	1768	14786			2.18304e+06	1.10412e+06	4658900	0.990907	0.468574	0.236992	0.395689
1411	0	1848	14786			2.59764e+06	1.14798e+06	4757201	1.06971	0.546044	0.241315	0.5207
1412	0	1928	14786			2337466	1.22325e+06	3.84667e+06	1.26577	0.60766	0.318003	0.586817
1413	0	2008	14786			1002904	518856	1.60015e+06	1.7721	0.626755	0.324254	0.813668
1414	0	2088	14786			692126	386994	764136	2.62488	0.905763	0.506447	1.18738
1415	0	2168	14786			2.04622e+06	1.17475e+06	1.80382e+06	3.32716	1.13438	0.651256	0.982632
1416	0	2248	14786			1.86863e+06	1.61485e+06	2.00766e+06	2.89282	0.930753	0.804348	0.777837
1417	0	2328	14786			2.01037e+06	1.56773e+06	1957689	3.28761	1.02691	0.800808	0.95178
1418	0	2408	14786			1.54549e+06	929358	1290981	2.78328	1.19715	0.719885	1.23138
1419	0	2488	14786			750851	448013	1.13386e+06	1.71448	0.66221	0.395123	0.886088
1420	0	2568	14786			637932	327879	900826	1.60379	0.708164	0.363976	0.860865
1421	0	2648	14786			614265	295161	1.02465e+06	1.48172	0.599488	0.28806	0.695463
1422	0	2728	14786			636906	363938	941105	1.46494	0.676764	0.386714	0.677512
1423	0	2808	14786			607394	410560	752410	2.34161	0.807265	0.54566	1.28479
1424	0	2888	14786			1.63964e+06	1.17218e+06	1.75192e+06	2.44536	0.93591	0.669081	0.990785
1425	0	2968	14786			2248266	1.45637e+06	2.46634e+06	2.27451	0.91158	0.590498	0.66688
1426	0	3048	14786			1.5046e+06	1.20227e+06	3.08121e+06	1.11866	0.488314	0.390194	0.754956
1427	0	3128	14786			1.5672e+06	920663	2.98676e+06	1.16128	0.524717	0.308248	0.853777
1428	0	3208	14786			1.5004e+06	1.0669e+06	3.42786e+06	0.840268	0.437708	0.311243	0.451025
1429	0	3288	14786			1.52866e+06	914999	3377263	0.857052	0.452633	0.270929	0.631678
1430	0	3368	14786			1343002	758002	2.96894e+06	0.830821	0.45235	0.25531	0.595315
1431	0	3448	14786			1.13601e+06	765692	2776319	0.755116	0.409178	0.275794	0.477934
1432	0	3528	14786			1.45278e+06	580939	2749701	0.607693	0.52834	0.211273	0.647583
1433	0	3608	14786			1.09125e+06	451425	2.2527e+06	0.590916	0.484421	0.200393	0.754932
1434	0	3688	14786			914434	248104	1.5785e+06	0.680751	0.579305	0.157177	0.591207
1435	0	3768	14786			762189	421634	2.09527e+06	0.569528	0.363767	0.201232	0.634424
1436	0	3848	14786			1.29626e+06	868242	3.83319e+06	0.536175	0.338168	0.226506	0.600072
1437	0	3928	14786			1.55403e+06	1.05766e+06	4449160	0.470753	0.349285	0.237721	0.711983
1438	0	4008	14786			1.73702e+06	839294	4.65797e+06	0.495722	0.372915	0.180184	0.728795
1439	0	4088	14786			1.43076e+06	857735	4.08604e+06	0.531126	0.350159	0.209919	0.695388
1440	0	4168	14786			1.52258e+06	1.07501e+06	5026554	0.404022	0.302907	0.213865	0.640582
1441	0	4248	14786			1462416	902114	4.64291e+06	0.365285	0.314979	0.194299	0.509207
1442	0	4328	14786			1.55844e+06	1.12176e+06	4.62906e+06	0.424974	0.336664	0.242329	0.532245
1443	0	4408	14786			1.63204e+06	926739	4500526	0.502047	0.362633	0.205918	0.557198
1444	0	4488	14786			2146654	830362	4552010	0.529467	0.471584	0.182417	0.8362
1445	0	4568	14786			1.84804e+06	863235	3.73435e+06	0.605536	0.494875	0.231161	0.667101
1446	0	4648	14786			1.81116e+06	1.08051e+06	4532559	0.661622	0.399588	0.238388	0.622163
1447	0	4728	14786			1.15669e+06	878574	3.37155e+06	0.630417	0.343073	0.260585	0.791567
1448	0	4808	14786			2.34393e+06	865100	3.58422e+06	0.656804	0.653958	0.241364	0.752281
1449	0	4888	14786			1.64448e+06	885358	4122637	0.642995	0.39889	0.214755	0.548133
1450	0	4968	14786			1.85998e+06	889160	3.55941e+06	0.70001	0.522554	0.249805	0.862163
1451	0	5048	14786			1.89603e+06	816590	3536931	0.869016	0.536068	0.230875	0.545579
1452	0	5128	14786			2.08182e+06	1064301	3868523	0.743319	0.538142	0.275118	0.514686
1453	0	5208	14786			2.54611e+06	1.2063e+06	4.93263e+06	0.638106	0.516177	0.244554	0.616778
1454	0	5288	14786			2.1195e+06	852319	4.20649e+06	0.746993	0.503864	0.20262	0.821035
1455	0	5368	14786			2.2229e+06	1.56328e+06	4217992	0.807302	0.527005	0.370622	0.754908
1456	0	5448	14786			2.91572e+06	1.33649e+06	5.17045e+06	0.735513	0.563921	0.258486	0.817714
1457	0	5528	14786			2166155	1.39548e+06	4.72153e+06	0.830909	0.458782	0.295556	0.828866
1458	0	5608	14786			2.66369e+06	1.65417e+06	5.42451e+06	1.10336	0.491047	0.304944	0.803291
1459	0	5688	14786			3.64453e+06	2.60222e+06	4.94128e+06	1.70121	0.737569	0.526629	1.22971
1460	0	5768	14786			3.95382e+06	2579256	3.81245e+06	2.70828	1.03708	0.676535	1.34311
1461	0	5848	14786			3.50139e+06	2.50048e+06	3.20774e+06	2.69538	1.09154	0.779513	1.5318
1462	0	5928	14786			2.4327e+06	1.94394e+06	3.07946e+06	2.20027	0.789977	0.631261	1.15679
1463	0	6008	14786			1.794e+06	1.13433e+06	1.96784e+06	1.80171	0.911661	0.576436	0.870292
1464	0	6088	14786			1.34708e+06	779252	2.08165e+06	1.33174	0.647122	0.374343	1.11938
1465	0	6168	14786			2.2789e+06	880858	2446229	1.12264	0.931599	0.360088	1.40353
1466	0	6248	14786			2.1678e+06	978933	3140066	1.01857	0.690367	0.311756	1.04323
1467	0	6328	14786			1764553	1.11132e+06	2.96072e+06	1.09428	0.595987	0.375355	0.80754
1468	0	6408	14786			1.46671e+06	637415	1.85943e+06	1.34808	0.788797	0.342802	1.33375
1469	0	6488	14786			1.12004e+06	644885	1.58524e+06	1.40322	0.706543	0.406806	1.03364
1470	0	6568	14786			2.0287e+06	1.32229e+06	2.53605e+06	1.83347	0.799944	0.521398	1.08776
1471	0	6648	14786			3.22983e+06	2.22543e+06	3.35862e+06	2.59188	0.961656	0.662603	0.876048
1472	0	6728	14786			2574469	1.92667e+06	2.76713e+06	2.61767	0.930374	0.69627	0.81118
1473	0	6808	14786			2.64043e+06	1.69594e+06	3.27537e+06	2.20343	0.806149	0.517787	0.788356
1474	0	6888	14786			2097326	1.76983e+06	3.05097e+06	2.01441	0.68743	0.580089	0.640457
1475	0	6968	14786			1.87358e+06	1.21792e+06	2.8124e+06	2.0519	0.666183	0.433054	0.99543
1476	0	7048	14786			2.42671e+06	1.80376e+06	3369856	1.89424	0.720124	0.535263	0.935575
1477	0	7128	14786			3.06435e+06	1.61999e+06	3692471	1.96458	0.829891	0.438727	0.791379
1478	0	7208	14786			2.77317e+06	1.32108e+06	3.83489e+06	1.56526	0.723142	0.344489	1.13482
1479	0	7288	14786			2.51765e+06	1.60121e+06	3.92654e+06	1.5731	0.641188	0.407792	0.528956
1480	0	7368	14786			2249363	1.04604e+06	3.97605e+06	1.19318	0.565728	0.263085	0.641739
1481	0	7448	14786			2.13978e+06	880940	4.72583e+06	0.998009	0.452784	0.18641	0.685951
1482	0	7528	14786			1.86787e+06	942006	4664114	0.888649	0.400476	0.201969	0.312821
1483	0	7608	14786			2201064	1244898	5398892	0.736822	0.407688	0.230584	0.438838
1484	0	7688	14786			2.08469e+06	1.01888e+06	4715637	0.785141	0.442081	0.216065	0.493173
1485	0	7768	14786			2.12658e+06	863974	4965624	0.71413	0.42826	0.173991	0.485404
1486	0	7848	14786			1.57903e+06	652697	4.69777e+06	0.575717	0.336122	0.138938	0.374949
1487	0	7928	14786			2.04039e+06	605520	5.21741e+06	0.723547	0.391074	0.116057	0.439596
1488	0	8008	14786			1.61928e+06	516454	4.54277e+06	0.676959	0.356453	0.113687	0.368994
1489	0	8088	14786			1.53426e+06	744946	5194162	0.524887	0.295382	0.14342	0.265054
1490	0	8168	14786			1.65733e+06	703454	5116760	0.543663	0.323903	0.13748	0.349286
1491	0	8248	14786			1.38765e+06	519563	4.54958e+06	0.527616	0.305005	0.1142	0.408746
1492	0	8328	14786			657316	308549	2944128	0.398116	0.223263	0.104802	0.247121
1493	0	8408	14786			861507	481540	3.92266e+06	0.435746	0.219623	0.122759	0.395075
1494	0	8488	14786			1.62347e+06	591549	7000711	0.316735	0.231901	0.0844984	0.309103
1495	0	8568	14786			1.45397e+06	469982	6804213	0.312531	0.213687	0.0690722	0.274005
1496	0	8648	14786			994835	299384	5210090	0.228039	0.190944	0.0574623	0.286218
1497	0	8728	14786			1.48825e+06	515782	7242531	0.165887	0.205488	0.0712158	0.266238
1498	0	8808	14786			1381737	500719	6901818	0.117276	0.200199	0.0725488	0.343183
1499	0	8888	14786			1.16011e+06	447526	4645477	0.105258	0.249728	0.0963359	0.2401
1500	0	8968	14786			301069	110183	1.16285e+06	0.1734	0.258906	0.0947526	0.502807
1501	0	9048	14786			242888	64174.4	724235	0.195507	0.335372	0.0886098	0.0126882
1502	0	9128	14786			25837.4	2415.52	130792	0.313428	0.197546	0.0184684	0.0909834
1503	0	808	14706			2131.24	2415.52	399376	0.593863	0.00533644	0.00604824	0.00618205
1504	0	888	14706			85448.6	2415.52	197286	0.00929049	0.433122	0.0122438	0.366901
1505	0	968	14706			2131.24	2415.52	152035	0.422702	0.0140182	0.015888	0.523487
1506	0	1048	14706			592743	157903	1.79608e+06	0.308792	0.330021	0.0879154	0.420271
1507	0	1128	14706			1.34844e+06	490716	4342355	0.319963	0.310532	0.113007	0.406988
1508	0	1208	14706			1.33886e+06	598239	4456544	0.405064	0.300427	0.134238	0.392261
1509	0	1288	14706			1.32861e+06	692916	3819549	0.590141	0.347845	0.181413	0.374176
1510	0	1368	14706			1.19188e+06	641394	3.4464e+06	0.626629	0.345834	0.186106	0.439721
1511	0	1448	14706			1.06918e+06	506348	2674822	0.684493	0.399721	0.189302	0.757918
1512	0	1528	14706			1.95102e+06	627261	4.26659e+06	0.829233	0.457277	0.147017	0.434391
1513	0	1608	14706			2076345	811295	4504620	0.764341	0.460937	0.180103	0.509314
1514	0	1688	14706			1.93399e+06	1.11802e+06	4507706	0.908382	0.429042	0.248024	0.377409
1515	0	1768	14706			3.20213e+06	1.57412e+06	5.2496e+06	1.17722	0.609977	0.299855	0.415154
1516	0	1848	14706			2.66485e+06	1.6828e+06	4.6324e+06	1.65621	0.575264	0.363268	0.942394
1517	0	1928	14706			2.29617e+06	1150558	3.38528e+06	1.83017	0.678281	0.339871	0.699475
1518	0	2008	14706			296734	213245	317312	3.17114	0.935149	0.672035	0.995093
1519	0	2088	14706			53052.2	23137.8	38944.9	2.93872	1.36224	0.594116	1.51629
1520	0	2168	14706			1.87169e+06	1155142	1553931	3.1536	1.20449	0.743368	0.862604
1521	0	2248	14706			2.15936e+06	1.52037e+06	1.73868e+06	3.70841	1.24195	0.874442	1.09846
1522	0	2328	14706			1.58261e+06	907120	1.27312e+06	2.99993	1.2431	0.712516	1.08639
1523	0	2408	14706			792665	435453	1.01268e+06	2.00153	0.782741	0.430002	0.711043
1524	0	2488	14706			890384	503392	1.23236e+06	1.84427	0.722506	0.408479	1.03736
1525	0	2568	14706			651264	343194	913366	1.70579	0.713037	0.375747	0.492498
1526	0	2648	14706			531275	348648	848589	1.79766	0.626068	0.410855	0.932691
1527	0	2728	14706			351416	183108	420218	1.87055	0.836269	0.435744	1.10414
1528	0	2808	14706			28945.3	30932.1	33547.2	1.32805	0.862823	0.922046	1.57935
1529	0	2888	14706			1.01332e+06	798178	1.20262e+06	2.65939	0.842591	0.6637	0.944735
1530	0	2968	14706			2.12527e+06	1.24371e+06	2.12678e+06	2.1984	0.999287	0.584785	0.673804
1531	0	3048	14706			1.66175e+06	1.27684e+06	2.67325e+06	1.55441	0.621622	0.477634	0.991208
1532	0	3128	14706			1.63538e+06	1.14415e+06	2.90717e+06	1.32167	0.562534	0.393562	0.497059
1533	0	3208	14706			1432730	912237	2.71606e+06	1.00583	0.527504	0.335868	0.776041
1534	0	3288	14706			1.15836e+06	863668	2963495	0.844872	0.390878	0.291435	0.462572
1535	0	3368	14706			1.13682e+06	700086	2.48338e+06	0.960197	0.457773	0.281909	0.616315
1536	0	3448	14706			1.51922e+06	691712	2.84207e+06	0.803094	0.534546	0.243383	0.558122
1537	0	3528	14706			1.28919e+06	631543	2583410	0.696573	0.499028	0.244461	0.736012
1538	0	3608	14706			1230726	838385	2569091	0.620751	0.479051	0.326335	0.557157
1539	0	3688	14706			1.4234e+06	821168	2.97741e+06	0.669019	0.478068	0.2758	0.688702
1540	0	3768	14706			1.50408e+06	851118	3.30936e+06	0.658616	0.454493	0.257185	0.932696
1541	0	3848	14706			2183920	906924	4315219	0.538169	0.506097	0.210169	0.644795
1542	0	3928	14706			2.42856e+06	1310751	5.09001e+06	0.556442	0.477122	0.257514	0.851706
1543	0	4008	14706			2.51703e+06	1.4351e+06	5719934	0.507177	0.440045	0.250894	0.630448
1544	0	4088	14706			2215340	1.07911e+06	5.45771e+06	0.537978	0.40591	0.197722	0.743366
1545	0	4168	14706			1.94306e+06	859635	4.93315e+06	0.482612	0.393877	0.174257	0.50012
1546	0	4248	14706			1.22413e+06	748331	3.67194e+06	0.478575	0.333375	0.203797	0.658161
1547	0	4328	14706			1.67814e+06	821596	4.32696e+06	0.49318	0.387833	0.189879	0.78324
1548	0	4408	14706			1.43022e+06	878295	3.87661e+06	0.501727	0.368937	0.226563	0.702526
1549	0	4488	14706			1677122	828800	3924272	0.535685	0.427371	0.211199	0.633286
1550	0	4568	14706			2028754	1.0994e+06	4.19029e+06	0.565109	0.484156	0.262367	0.52658
1551	0	4648	14706			1.87628e+06	992554	5.16357e+06	0.40103	0.363369	0.192222	0.634036
1552	0	4728	14706			1639486	832927	4.87319e+06	0.452153	0.33643	0.17092	0.425317
1553	0	4808	14706			1.89495e+06	858933	3.85659e+06	0.544969	0.491353	0.222718	0.484602
1554	0	4888	14706			1.82124e+06	1.00278e+06	4353406	0.513282	0.418348	0.230344	0.652211
1555	0	4968	14706			1.97861e+06	1.02724e+06	4.99013e+06	0.502585	0.396505	0.205855	0.498698
1556	0	5048	14706			1.80746e+06	1.06206e+06	4.97782e+06	0.511518	0.363103	0.213359	0.530114
1557	0	5128	14706			2.2633e+06	1.20038e+06	4.90783e+06	0.553537	0.46116	0.244585	0.55721
1558	0	5208	14706			2.6305e+06	1.3264e+06	5744587	0.53706	0.45791	0.230896	0.562078
1559	0	5288	14706			1.9847e+06	1.0288e+06	4.19317e+06	0.606373	0.473318	0.245353	0.384547
1560	0	5368	14706			2370275	1.04135e+06	4412285	0.733456	0.537199	0.236012	0.603008
1561	0	5448	14706			2.45799e+06	1.58829e+06	4382911	0.998267	0.560813	0.362383	0.929461
1562	0	5528	14706			2.47268e+06	1.49141e+06	4.23556e+06	1.24815	0.58379	0.352117	0.949919
1563	0	5608	14706			2.5474e+06	1.76336e+06	3700666	1.77301	0.688363	0.476497	0.629996
1564	0	5688	14706			3.04958e+06	2.12924e+06	3162219	2.43302	0.96438	0.673337	1.37731
1565	0	5768	14706			3.11911e+06	2.2382e+06	3119433	2.91624	0.999895	0.717501	0.877045
1566	0	5848	14706			3.15627e+06	2.62404e+06	3526564	2.58588	0.894997	0.744079	1.12429
1567	0	5928	14706			3.61249e+06	2.33936e+06	3.74963e+06	2.43462	0.963428	0.623892	0.559798
1568	0	6008	14706			2.7603e+06	2.18616e+06	3.07334e+06	2.36883	0.898143	0.71133	0.768259
1569	0	6088	14706			2150982	943081	2.2008e+06	1.5534	0.977363	0.428517	1.20826
1570	0	6168	14706			2.20334e+06	936224	2.49997e+06	1.31129	0.881349	0.374495	1.36612
1571	0	6248	14706			1.92576e+06	874896	2.33394e+06	1.42649	0.825111	0.374858	0.607847
1572	0	6328	14706			1.81738e+06	923161	2.21343e+06	1.17236	0.821072	0.417073	0.68356
1573	0	6408	14706			1.48224e+06	938596	2.04681e+06	1.61728	0.724173	0.458566	0.686519
1574	0	6488	14706			2.31221e+06	946190	2.81859e+06	1.15873	0.820344	0.335697	1.21133
1575	0	6568	14706			2.5829e+06	1.20624e+06	4416089	0.758546	0.584884	0.273146	0.75026
1576	0	6648	14706			3.68579e+06	1.73645e+06	4541347	1.15283	0.811607	0.382364	0.746467
1577	0	6728	14706			2.45409e+06	1589099	2.50752e+06	2.81728	0.97869	0.633732	0.467379
1578	0	6808	14706			2.39472e+06	1.59559e+06	2.85158e+06	2.21031	0.839787	0.559545	0.731868
1579	0	6888	14706			3.07053e+06	1.91367e+06	2.61215e+06	2.70637	1.17548	0.732602	0.843094
1580	0	6968	14706			2.54862e+06	2.17382e+06	2956779	2.44881	0.861957	0.7352	0.944657
1581	0	7048	14706			2.53248e+06	1785867	3.21542e+06	2.00283	0.787606	0.555408	0.823012
1582	0	7128	14706			2.69064e+06	1.36169e+06	2.82566e+06	2.4899	0.952217	0.4819	0.718249
1583	0	7208	14706			1.88794e+06	1.19264e+06	2.44742e+06	2.55571	0.771401	0.487306	0.797009
1584	0	7288	14706			2.6589e+06	1.39923e+06	3.21577e+06	2.34629	0.826831	0.435115	0.791423
1585	0	7368	14706			2.22078e+06	1.23717e+06	3355321	1.62731	0.661867	0.368718	0.75395
1586	0	7448	14706			2.64709e+06	1248024	4035314	1.33878	0.655981	0.309276	0.596969
1587	0	7528	14706			2322850	952360	3.85639e+06	1.17513	0.602338	0.246957	0.568091
1588	0	7608	14706			2.30688e+06	1.08679e+06	4629547	0.841092	0.498294	0.234752	0.603472
1589	0	7688	14706			1672272	734885	3264464	0.856525	0.512265	0.225117	0.418385
1590	0	7768	14706			2.06593e+06	951356	4214447	1.02026	0.490201	0.225737	0.490921
1591	0	7848	14706			1.81844e+06	1.06686e+06	4.72461e+06	0.829919	0.384887	0.22581	0.364534
1592	0	7928	14706			2.19833e+06	955057	5.07367e+06	0.674528	0.433282	0.188238	0.458205
1593	0	8008	14706			1.99448e+06	946550	5.27868e+06	0.756187	0.377837	0.179316	0.391239
1594	0	8088	14706			1.56321e+06	745256	4061265	0.707308	0.384907	0.183503	0.393726
1595	0	8168	14706			1.43722e+06	719650	4704694	0.552728	0.305486	0.152964	0.344681
1596	0	8248	14706			1.81547e+06	739310	4986940	0.650027	0.364045	0.148249	0.534389
1597	0	8328	14706			1.54672e+06	477545	5556082	0.44933	0.278383	0.08595	0.44345
1598	0	8408	14706			1.32755e+06	517667	3.8655e+06	0.570204	0.343435	0.13392	0.355283
1599	0	8488	14706			1.44391e+06	451369	5576983	0.421669	0.258906	0.0809342	0.321741
1600	0	8568	14706			1625503	628340	5907808	0.361406	0.275145	0.106357	0.253172
1601	0	8648	14706			973741	413640	5.38781e+06	0.297941	0.18073	0.0767733	0.161912
1602	0	8728	14706			1.6327e+06	573214	6.48068e+06	0.307331	0.251933	0.0884496	0.294165
1603	0	8808	14706			1.29486e+06	504480	7.49861e+06	0.164191	0.17268	0.0672764	0.279384
1604	0	8888	14706			1.38927e+06	458554	7.45345e+06	0.113598	0.186393	0.0615223	0.259653
1605	0	8968	14706			1.17317e+06	414906	4.47568e+06	0.0999525	0.26212	0.0927021	0.312167
1606	0	9048	14706			219265	107050	1261608	0.190345	0.173798	0.0848522	0.017708
1607	0	9128	14706			164347	2415.52	735041	0.201476	0.223589	0.00328624	0.0390732
1608	0	728	14626			2131.24	2415.52	2228.3	0.822546	0.956444	1.08402	0.95178
1609	0	808	14626			2131.24	2415.52	745863	0.00245739	0.00285742	0.00323855	0.0047728
1610	0	888	14626			2131.24	2415.52	321956	0.330702	0.00661968	0.00750265	0.0110765
1611	0	968	14626			2131.24	2415.52	13456.6	0.136207	0.158379	0.179504	0.856972
1612	0	1048	14626			117007	29490.9	225062	0.415846	0.519887	0.131034	0.398546
1613	0	1128	14626			165309	83739.6	443050	0.505292	0.373115	0.189007	0.447594
1614	0	1208	14626			649777	275311	2011880	0.450761	0.32297	0.136843	0.334294
1615	0	1288	14626			908737	541405	3.09884e+06	0.529677	0.293251	0.174712	0.329865
1616	0	1368	14626			701093	330170	1.80762e+06	0.802218	0.387855	0.182655	0.407968
1617	0	1448	14626			2.00454e+06	854405	4.73447e+06	0.751696	0.423392	0.180465	0.428376
1618	0	1528	14626			1.9139e+06	963823	5.31191e+06	0.721639	0.360304	0.181446	0.500981
1619	0	1608	14626			1.97916e+06	957434	4350017	0.813479	0.454977	0.220099	0.582828
1620	0	1688	14626			1.58967e+06	865255	3444875	1.29418	0.46146	0.251172	0.713281
1621	0	1768	14626			2.22274e+06	1.05563e+06	3.04517e+06	1.65927	0.729925	0.346659	0.68117
1622	0	1848	14626			2985593	1.46946e+06	3.81494e+06	2.15825	0.782605	0.385185	0.630023
1623	0	1928	14626			2574621	1.5517e+06	2.85293e+06	2.93044	0.902447	0.543895	0.781206
1624	0	2008	14626			1.65427e+06	1112546	1.55427e+06	3.16186	1.06434	0.715799	1.27897
1625	0	2088	14626			1.4769e+06	969707	1.19109e+06	3.57018	1.23996	0.814136	1.4918
1626	0	2168	14626			1.57587e+06	1.50635e+06	1.48887e+06	3.20248	1.05843	1.01174	1.51947
1627	0	2248	14626			1457563	916359	1.37515e+06	2.98708	1.05993	0.666369	1.33756
1628	0	2328	14626			1.09202e+06	641378	1.19407e+06	2.35201	0.914533	0.537134	0.867701
1629	0	2408	14626			797835	372213	825844	2.24285	0.966084	0.450706	1.12807
1630	0	2488	14626			686554	345744	737835	2.24834	0.930498	0.468593	0.812716
1631	0	2568	14626			597014	341071	731703	2.18054	0.815924	0.466134	0.903609
1632	0	2648	14626			633599	349284	826485	1.88331	0.766619	0.422614	1.22474
1633	0	2728	14626			566256	275349	602455	2.0415	0.939915	0.457045	1.07636
1634	0	2808	14626			1.00866e+06	746506	981846	2.69159	1.02731	0.760309	0.821421
1635	0	2888	14626			1.66545e+06	1065138	1.58183e+06	2.67823	1.05286	0.673356	0.70657
1636	0	2968	14626			2.49964e+06	1.95086e+06	2.11652e+06	3.10842	1.18101	0.921726	1.15616
1637	0	3048	14626			2.68793e+06	2015475	2.67749e+06	2.85331	1.0039	0.752748	1.13912
1638	0	3128	14626			2.1573e+06	1.67516e+06	2389543	2.51555	0.902807	0.701039	1.27565
1639	0	3208	14626			1.44116e+06	784666	1.99279e+06	1.6585	0.723185	0.393752	0.878284
1640	0	3288	14626			1.41827e+06	917277	2.37235e+06	1.4847	0.597833	0.386653	1.04352
1641	0	3368	14626			1.24731e+06	919026	2689403	1.05996	0.463789	0.341721	0.805003
1642	0	3448	14626			1.37621e+06	791750	2.79207e+06	0.873959	0.492898	0.283571	0.505355
1643	0	3528	14626			1.33661e+06	917938	3.06318e+06	0.865592	0.436348	0.299669	0.919482
1644	0	3608	14626			1.37425e+06	949121	3127919	0.783124	0.43935	0.303435	0.751247
1645	0	3688	14626			1.5774e+06	958390	3.28156e+06	0.876409	0.480686	0.292054	0.854303
1646	0	3768	14626			1.72407e+06	790948	3.41547e+06	0.777484	0.504783	0.231578	0.771384
1647	0	3848	14626			1.79685e+06	750047	4029105	0.61629	0.445969	0.186157	0.863185
1648	0	3928	14626			3053160	1.18657e+06	5.73545e+06	0.474859	0.532332	0.206884	0.587861
1649	0	4008	14626			2.37435e+06	1.00357e+06	5.30288e+06	0.497109	0.447747	0.189249	0.833103
1650	0	4088	14626			2.52118e+06	1.32701e+06	5721402	0.477278	0.440657	0.231938	0.708279
1651	0	4168	14626			1.97389e+06	808797	4177715	0.570809	0.472481	0.193598	0.695829
1652	0	4248	14626			2121213	856773	5033996	0.492967	0.421378	0.170197	0.730331
1653	0	4328	14626			1.98156e+06	947481	4.91876e+06	0.41242	0.402856	0.192626	0.549827
1654	0	4408	14626			2.621e+06	1.27464e+06	6490508	0.448308	0.40382	0.196386	0.538113
1655	0	4488	14626			2.06942e+06	977483	4.80581e+06	0.4713	0.430608	0.203396	0.71551
1656	0	4568	14626			1907016	812395	5.25313e+06	0.43096	0.363025	0.15465	0.625134
1657	0	4648	14626			1904923	922479	5671304	0.375282	0.335888	0.162657	0.525803
1658	0	4728	14626			2.16896e+06	1.08482e+06	4840490	0.446412	0.448087	0.224113	0.5529
1659	0	4808	14626			2.11524e+06	1.04471e+06	5.21063e+06	0.414617	0.405947	0.200496	0.802156
1660	0	4888	14626			2.31244e+06	958420	5564567	0.431704	0.415566	0.172236	0.650139
1661	0	4968	14626			1.86016e+06	1.04238e+06	4.82648e+06	0.403315	0.385407	0.215972	0.593158
1662	0	5048	14626			1.6865e+06	897653	4.23968e+06	0.450117	0.39779	0.211727	0.419406
1663	0	5128	14626			2048602	1.07442e+06	4.71637e+06	0.519277	0.43436	0.227806	0.797412
1664	0	5208	14626			2.25323e+06	1.11733e+06	4469006	0.628812	0.50419	0.250017	0.508639
1665	0	5288	14626			2850642	1.17407e+06	6123447	0.532092	0.465529	0.191733	0.708337
1666	0	5368	14626			3.01535e+06	1.62821e+06	6.02948e+06	0.744415	0.500101	0.270041	0.629427
1667	0	5448	14626			2489643	1.85884e+06	4766533	1.34098	0.522317	0.389978	0.613079
1668	0	5528	14626			2351662	1.58928e+06	3.08397e+06	1.88472	0.762544	0.515337	1.10198
1669	0	5608	14626			2.85495e+06	2.42703e+06	3.0193e+06	2.47927	0.945568	0.803839	1.16191
1670	0	5688	14626			2115313	1.677e+06	2.13805e+06	2.52371	0.989364	0.784357	1.10396
1671	0	5768	14626			2.47509e+06	1.65565e+06	2.87478e+06	2.48944	0.860967	0.575924	1.24984
1672	0	5848	14626			3243551	2.32909e+06	3.15477e+06	2.86576	1.02814	0.738275	0.415417
1673	0	5928	14626			2.70733e+06	1.88286e+06	2696135	2.70437	1.00415	0.698355	1.09556
1674	0	6008	14626			3.08213e+06	2176703	3.13435e+06	2.35458	0.983339	0.694468	0.729673
1675	0	6088	14626			2.47528e+06	1.84517e+06	2.55771e+06	2.03105	0.967772	0.721413	1.04017
1676	0	6168	14626			1.95651e+06	818457	2.3741e+06	1.42736	0.824106	0.344745	0.921184
1677	0	6248	14626			1.47568e+06	827070	2.35733e+06	1.18242	0.626	0.350851	0.648422
1678	0	6328	14626			2416239	1.16236e+06	3.76301e+06	0.909667	0.642103	0.308891	0.921076
1679	0	6408	14626			2.31889e+06	1.00751e+06	2.58304e+06	1.2802	0.897737	0.390049	1.31904
1680	0	6488	14626			2.48729e+06	1.03141e+06	2.86091e+06	1.21355	0.869406	0.360518	1.13632
1681	0	6568	14626			3127565	1453539	4.10238e+06	0.980022	0.762378	0.354316	0.577061
1682	0	6648	14626			2.97325e+06	1.5612e+06	3357653	1.84331	0.885514	0.464969	0.891234
1683	0	6728	14626			3.24828e+06	1.30832e+06	4085743	1.27655	0.795027	0.320215	0.680895
1684	0	6808	14626			2.7658e+06	1.7566e+06	3.15615e+06	2.55596	0.876321	0.556564	1.16391
1685	0	6888	14626			3.15482e+06	1.74482e+06	3.4431e+06	2.61385	0.916273	0.506758	1.24117
1686	0	6968	14626			3.70262e+06	1.64066e+06	4388341	1.34085	0.84374	0.373867	0.796715
1687	0	7048	14626			2.91924e+06	1.15862e+06	3537528	1.61532	0.82522	0.327524	1.20496
1688	0	7128	14626			2.09369e+06	1.61874e+06	2.80436e+06	2.46987	0.746584	0.577225	0.986802
1689	0	7208	14626			2.93802e+06	1.60191e+06	2.7854e+06	2.77991	1.05479	0.575111	0.958531
1690	0	7288	14626			2332229	1.58047e+06	2588311	2.83571	0.901062	0.610619	0.858993
1691	0	7368	14626			2158594	1.60232e+06	2.62786e+06	2.43466	0.821426	0.609741	0.872498
1692	0	7448	14626			2.34187e+06	1.52165e+06	3.25937e+06	2.1939	0.718503	0.466855	1.10097
1693	0	7528	14626			2.40933e+06	1.45614e+06	3318211	1.77482	0.726092	0.438831	0.997654
1694	0	7608	14626			1.78215e+06	941432	2.84346e+06	1.44579	0.626755	0.331087	0.910035
1695	0	7688	14626			2.30003e+06	1.44203e+06	4425135	1.26525	0.519765	0.325872	0.61879
1696	0	7768	14626			2730911	1.31966e+06	4.92133e+06	1.0919	0.554913	0.268151	0.566926
1697	0	7848	14626			2.199e+06	1.09308e+06	4.95149e+06	0.927062	0.444108	0.220758	0.485924
1698	0	7928	14626			2.06462e+06	793192	5070350	0.827078	0.407194	0.156437	0.362623
1699	0	8008	14626			2352214	1068815	5.74068e+06	0.679704	0.409745	0.186183	0.411631
1700	0	8088	14626			1.8208e+06	722450	4393854	0.911126	0.414397	0.164423	0.417492
1701	0	8168	14626			2.00601e+06	810912	5276919	0.689592	0.380147	0.153671	0.465964
1702	0	8248	14626			1612503	666453	5.39122e+06	0.518313	0.299098	0.123618	0.457001
1703	0	8328	14626			1.64025e+06	626632	4881251	0.572725	0.336031	0.128375	0.281583
1704	0	8408	14626			1.30437e+06	534379	4.67604e+06	0.411635	0.278948	0.11428	0.372618
1705	0	8488	14626			1.5996e+06	713798	5.74155e+06	0.40823	0.2786	0.124322	0.25108
1706	0	8568	14626			1530831	558662	5169327	0.446842	0.296137	0.108072	0.282179
1707	0	8648	14626			1.69451e+06	512272	6673000	0.414539	0.253936	0.0767679	0.358401
1708	0	8728	14626			1.0501e+06	553175	6627639	0.255309	0.158443	0.0834649	0.220718
1709	0	8808	14626			1.55327e+06	491942	7.42846e+06	0.170443	0.209097	0.0662239	0.305548
1710	0	8888	14626			1.40623e+06	414117	6999340	0.166814	0.200908	0.0591651	0.322404
1711	0	8968	14626			1.21005e+06	424292	6045935	0.117443	0.200142	0.0701781	0.392054
1712	0	9048	14626			976673	316008	3.77705e+06	0.116419	0.258581	0.0836654	0.206897
1713	0	9128	14626			699861	177985	2.76261e+06	0.212481	0.253334	0.0644265	0.00438399
1714	0	728	14546			2131.24	2415.52	2228.3	0.822546	0.956444	1.08402	0.95178
1715	0	808	14546			2131.24	2415.52	995509	0.23709	0.00214086	0.00242642	0.00535761
1716	0	888	14546			336703	112992	1.12458e+06	0.225349	0.299404	0.100475	0.318875
1717	0	968	14546			202682	69192.2	619463	0.406645	0.327189	0.111697	0.545115
1718	0	1048	14546			224410	103241	556635	0.497652	0.403154	0.185474	0.382922
1719	0	1128	14546			310863	113534	755059	0.453624	0.411707	0.150365	0.787055
1720	0	1208	14546			407746	128134	1.0352e+06	0.549977	0.39388	0.123777	0.362412
1721	0	1288	14546			1.51212e+06	730215	4064868	0.563365	0.371998	0.179641	0.412193
1722	0	1368	14546			1.84177e+06	820567	4185750	0.75855	0.440009	0.196038	0.458462
1723	0	1448	14546			1.89248e+06	882013	4268407	0.787635	0.443369	0.206638	0.477619
1724	0	1528	14546			2.10474e+06	854137	3555923	0.97082	0.591896	0.240201	0.588992
1725	0	1608	14546			1.96349e+06	968790	3109088	1.39792	0.631532	0.3116	0.476971
1726	0	1688	14546			1.85228e+06	1.06002e+06	2.49036e+06	1.82914	0.743778	0.425648	0.826299
1727	0	1768	14546			2642976	1.43223e+06	3.27589e+06	2.19113	0.806796	0.437204	1.27691
1728	0	1848	14546			3.04914e+06	1.55119e+06	2.90797e+06	3.17958	1.04855	0.533428	0.794299
1729	0	1928	14546			2606843	1.75167e+06	2.74162e+06	2.85174	0.950841	0.638918	1.70929
1730	0	2008	14546			2.48813e+06	1958113	2.75858e+06	2.96661	0.901962	0.709827	0.807297
1731	0	2088	14546			1850406	1.24497e+06	1.34347e+06	3.99696	1.37733	0.926681	1.5516
1732	0	2168	14546			2.19116e+06	1475805	1.80323e+06	3.49081	1.21513	0.818421	1.10677
1733	0	2248	14546			1.72183e+06	1.13179e+06	1.61801e+06	2.82797	1.06417	0.699496	0.764856
1734	0	2328	14546			867371	514271	903874	2.30377	0.959615	0.568963	0.927075
1735	0	2408	14546			816545	550275	890186	2.62831	0.917275	0.618158	0.68891
1736	0	2488	14546			1.0107e+06	592116	1.20598e+06	2.3282	0.83807	0.490983	0.822509
1737	0	2568	14546			842709	429595	1.04297e+06	1.73587	0.807992	0.411897	0.927789
1738	0	2648	14546			747795	395130	805055	2.44989	0.928874	0.490811	0.90993
1739	0	2728	14546			1192016	549189	911529	2.44154	1.30771	0.602492	1.18131
1740	0	2808	14546			2196559	1.6674e+06	2.09349e+06	2.54835	1.04923	0.796468	1.18698
1741	0	2888	14546			2.35621e+06	1.89068e+06	2.09703e+06	3.094	1.12359	0.9016	1.38374
1742	0	2968	14546			2.30312e+06	1.93984e+06	2.35961e+06	2.93206	0.976061	0.822105	0.787358
1743	0	3048	14546			3.07529e+06	2024403	2.41921e+06	3.26911	1.2712	0.836803	0.907347
1744	0	3128	14546			2.33641e+06	1.63777e+06	2405415	2.60745	0.971313	0.680868	0.628952
1745	0	3208	14546			2.30799e+06	1.74789e+06	2.41616e+06	2.57751	0.95523	0.723418	0.989423
1746	0	3288	14546			1.55492e+06	986109	1.74041e+06	2.46264	0.893423	0.566595	1.04399
1747	0	3368	14546			1.91147e+06	1.29239e+06	2.18866e+06	2.16825	0.87335	0.590492	0.974625
1748	0	3448	14546			1.71252e+06	1.02458e+06	2.12571e+06	2.06132	0.805622	0.481994	0.720448
1749	0	3528	14546			1454619	930706	1.8978e+06	1.9887	0.766477	0.490413	0.540369
1750	0	3608	14546			1.43147e+06	965021	1.78412e+06	1.84708	0.802336	0.540893	0.815345
1751	0	3688	14546			1670221	987274	2.35532e+06	1.48506	0.709128	0.419168	0.995738
1752	0	3768	14546			2.18137e+06	1.33803e+06	3.09901e+06	1.45236	0.703891	0.431761	0.570988
1753	0	3848	14546			1.97833e+06	1.163e+06	3759814	1.11041	0.526177	0.309324	0.822109
1754	0	3928	14546			2.19308e+06	1.14462e+06	4.28332e+06	0.939439	0.512005	0.267227	0.716046
1755	0	4008	14546			2.05355e+06	1277105	4124939	0.853084	0.497837	0.309606	0.657595
1756	0	4088	14546			2.59523e+06	1562611	4.9876e+06	0.683431	0.520337	0.313299	0.715686
1757	0	4168	14546			3006744	1.60037e+06	6.28604e+06	0.722737	0.478321	0.254592	0.630253
1758	0	4248	14546			2711091	1.13504e+06	5.66225e+06	0.505859	0.478801	0.200457	0.739852
1759	0	4328	14546			2.43728e+06	1.19779e+06	5.6514e+06	0.403346	0.431271	0.211946	0.615972
1760	0	4408	14546			2.26924e+06	945706	4698837	0.520606	0.482937	0.201264	0.715008
1761	0	4488	14546			2.04176e+06	1.0571e+06	4750697	0.473394	0.429782	0.222514	0.672587
1762	0	4568	14546			1.98463e+06	1.17871e+06	6.57002e+06	0.351854	0.302075	0.179408	0.495106
1763	0	4648	14546			2.18538e+06	863490	5.54276e+06	0.335842	0.394276	0.155787	0.518615
1764	0	4728	14546			1.89719e+06	1.05689e+06	4751252	0.447987	0.399304	0.222445	0.761516
1765	0	4808	14546			1.76296e+06	742860	3.12662e+06	0.568351	0.563856	0.237592	0.751062
1766	0	4888	14546			1.77086e+06	719574	4182650	0.44438	0.423383	0.172038	0.615814
1767	0	4968	14546			1.75642e+06	686128	3.72396e+06	0.426336	0.471654	0.184247	0.775281
1768	0	5048	14546			1894144	1.07755e+06	4570059	0.386682	0.414468	0.235785	0.596137
1769	0	5128	14546			1882407	986988	5.60411e+06	0.420666	0.335898	0.176119	0.461953
1770	0	5208	14546			1764876	992024	4988141	0.392072	0.353814	0.198877	0.455824
1771	0	5288	14546			2.04066e+06	863943	4243749	0.588714	0.480863	0.20358	0.833618
1772	0	5368	14546			2.0844e+06	1.17558e+06	4331792	0.712814	0.481187	0.271383	0.609022
1773	0	5448	14546			2.0301e+06	1.49884e+06	3.59792e+06	1.19666	0.564242	0.416585	0.625761
1774	0	5528	14546			2.37436e+06	1.93939e+06	2849609	2.20684	0.833224	0.680582	0.966
1775	0	5608	14546			3.00101e+06	2.54229e+06	2.64808e+06	2.61827	1.13328	0.960048	0.828322
1776	0	5688	14546			2.76522e+06	2.415e+06	3.0089e+06	2.63617	0.919013	0.802621	1.06001
1777	0	5768	14546			2.69724e+06	2283842	2.6893e+06	2.68983	1.00295	0.849233	1.02043
1778	0	5848	14546			3175897	2.38025e+06	3.15185e+06	3.00825	1.00763	0.755191	1.97453
1779	0	5928	14546			2.34412e+06	1.99087e+06	2.44796e+06	2.84661	0.957579	0.813277	1.52629
1780	0	6008	14546			3.53515e+06	2.13805e+06	3.3153e+06	2.48367	1.06631	0.644902	0.913896
1781	0	6088	14546			3.12268e+06	2446145	3338273	2.45048	0.935419	0.732758	1.146
1782	0	6168	14546			2.81643e+06	1.80773e+06	2.76114e+06	2.21894	1.02002	0.654703	1.27462
1783	0	6248	14546			2106930	959061	2.72976e+06	1.23194	0.771836	0.351335	1.07386
1784	0	6328	14546			2188583	950240	2.42594e+06	1.44131	0.902158	0.391699	1.2822
1785	0	6408	14546			2.00505e+06	869512	2.29392e+06	1.31753	0.874071	0.379051	1.15652
1786	0	6488	14546			2.78777e+06	1.56815e+06	3.35419e+06	1.4928	0.831129	0.467518	0.994134
1787	0	6568	14546			3.05548e+06	1.64973e+06	4.35587e+06	1.04019	0.701464	0.378738	0.632966
1788	0	6648	14546			3315576	1.79474e+06	4.32439e+06	1.2199	0.766715	0.415027	0.875618
1789	0	6728	14546			3.05804e+06	1.69284e+06	4.45546e+06	1.10246	0.686358	0.379948	0.6247
1790	0	6808	14546			2.38555e+06	1.39319e+06	2.44651e+06	2.59309	0.975084	0.569458	0.935822
1791	0	6888	14546			2533477	1.18572e+06	3.13576e+06	1.40961	0.807931	0.378128	0.655124
1792	0	6968	14546			2810265	924015	3.9335e+06	0.898945	0.714444	0.234909	0.882517
1793	0	7048	14546			2.97118e+06	1.63262e+06	3.68249e+06	1.87533	0.806839	0.443346	0.756364
1794	0	7128	14546			3.50978e+06	1.38962e+06	4.10388e+06	1.67099	0.855234	0.338611	0.777533
1795	0	7208	14546			2.8721e+06	1.25787e+06	3645518	1.42833	0.787843	0.345044	0.724873
1796	0	7288	14546			2656397	1.60484e+06	3.11775e+06	2.59875	0.852024	0.514742	0.911669
1797	0	7368	14546			2.09667e+06	1.15995e+06	2686895	2.32509	0.780333	0.431708	0.807592
1798	0	7448	14546			1.72889e+06	1.47155e+06	2289637	2.70029	0.755096	0.642699	1.12908
1799	0	7528	14546			2.84403e+06	1.50948e+06	3.04822e+06	2.52983	0.933012	0.495201	0.992299
1800	0	7608	14546			2.88747e+06	1.86652e+06	3.75739e+06	2.36885	0.768478	0.496761	0.839614
1801	0	7688	14546			2578082	1.26749e+06	4.07192e+06	1.60417	0.633136	0.311276	0.645661
1802	0	7768	14546			2260360	1.06423e+06	3.85807e+06	1.35178	0.585878	0.275845	0.581609
1803	0	7848	14546			2207742	1.14112e+06	4262974	1.13062	0.517888	0.267682	0.346933
1804	0	7928	14546			2.10582e+06	1.09354e+06	4.76302e+06	0.903705	0.442119	0.229591	0.583232
1805	0	8008	14546			1.96511e+06	905589	4806679	0.965068	0.408828	0.188402	0.180238
1806	0	8088	14546			2.16803e+06	756484	5953259	0.785445	0.364175	0.127071	0.477694
1807	0	8168	14546			2.08178e+06	905316	5056590	0.8935	0.411696	0.179037	0.67762
1808	0	8248	14546			1.80628e+06	537702	4544732	0.690455	0.397444	0.118313	0.354604
1809	0	8328	14546			1.30908e+06	771017	4.41273e+06	0.618371	0.29666	0.174725	0.408682
1810	0	8408	14546			1.18075e+06	654328	4.07811e+06	0.58773	0.289534	0.160449	0.295035
1811	0	8488	14546			1326411	630954	4315803	0.580972	0.307338	0.146196	0.335683
1812	0	8568	14546			1.3154e+06	534258	4.60698e+06	0.587142	0.285523	0.115967	0.389011
1813	0	8648	14546			1769393	603844	5.92113e+06	0.496462	0.298827	0.101981	0.339548
1814	0	8728	14546			1.41143e+06	623692	5.59366e+06	0.344311	0.252327	0.1115	0.344001
1815	0	8808	14546			1.22385e+06	546186	6144606	0.278028	0.199174	0.0888886	0.361405
1816	0	8888	14546			1464071	509218	7.64327e+06	0.183315	0.19155	0.066623	0.250377
1817	0	8968	14546			1.51791e+06	579905	7.9591e+06	0.14346	0.190714	0.0728606	0.313023
1818	0	9048	14546			1.42819e+06	489191	6690264	0.112093	0.213473	0.0731198	0.232913
1819	0	9128	14546			631793	200228	2.38087e+06	0.179936	0.265362	0.0840983	0.321258
1820	0	9208	14546			87512.6	25400.6	289923	0.248929	0.301848	0.0876117	0.0688304
1821	0	648	14466			2131.24	2415.52	2228.3	0.822546	0.956444	1.08402	0.95178
1822	0	728	14466			2131.24	2415.52	2228.3	0.822546	0.956444	1.08402	0.95178
1823	0	808	14466			323151	2415.52	1.07451e+06	0.243233	0.300741	0.00224801	0.435945
1824	0	888	14466			930532	374420	2443440	0.336345	0.380828	0.153235	0.377769
1825	0	968	14466			419697	212122	1.24081e+06	0.386295	0.338243	0.170954	0.516195
1826	0	1048	14466			484812	260360	1.76682e+06	0.345459	0.274397	0.147361	0.330329
1827	0	1128	14466			533422	291951	1.99696e+06	0.441635	0.267116	0.146198	0.335696
1828	0	1208	14466			1.009e+06	536533	2919397	0.618655	0.345619	0.183782	0.404586
1829	0	1288	14466			1227990	472604	2934863	0.732702	0.418415	0.161031	0.539673
1830	0	1368	14466			2115086	907379	4433055	0.778365	0.477117	0.204685	0.497098
1831	0	1448	14466			1.65122e+06	710916	2994722	1.01766	0.551378	0.23739	0.563613
1832	0	1528	14466			1.54228e+06	733562	2.72326e+06	0.929927	0.566338	0.269369	0.546648
1833	0	1608	14466			1.80953e+06	732218	2266854	1.71113	0.798256	0.32301	0.564667
1834	0	1688	14466			1.9287e+06	946308	2283473	1.92932	0.844633	0.414416	0.949571
1835	0	1768	14466			2.52864e+06	1.17357e+06	1.92995e+06	4.182	1.31021	0.608086	0.759907
1836	0	1848	14466			2.86737e+06	2.06019e+06	2.54789e+06	3.96417	1.12539	0.808588	1.34209
1837	0	1928	14466			2.80122e+06	2.19769e+06	2.33758e+06	3.88012	1.19834	0.940157	1.11712
1838	0	2008	14466			2.85778e+06	1.86575e+06	2340872	3.27928	1.22082	0.797033	1.37495
1839	0	2088	14466			3.11693e+06	2.11086e+06	2.61914e+06	3.04565	1.19006	0.805936	0.788681
1840	0	2168	14466			2.68359e+06	2.00803e+06	2.38652e+06	3.09392	1.12448	0.841408	1.07279
1841	0	2248	14466			2.21859e+06	1609996	1.87409e+06	3.37689	1.18383	0.859083	1.15592
1842	0	2328	14466			1.21991e+06	691770	1.1816e+06	2.64359	1.03243	0.585454	1.06733
1843	0	2408	14466			1.04532e+06	484515	1.00285e+06	2.43509	1.04236	0.483139	1.19025
1844	0	2488	14466			1.11207e+06	566489	862495	2.78961	1.28936	0.656803	1.41808
1845	0	2568	14466			1.46392e+06	648991	1.07017e+06	2.48492	1.36793	0.606437	1.52988
1846	0	2648	14466			959150	474581	851976	2.65393	1.12579	0.557036	1.56617
1847	0	2728	14466			1.98256e+06	1.41459e+06	1.36115e+06	3.55557	1.45653	1.03926	1.24685
1848	0	2808	14466			2.2413e+06	1.58474e+06	1.84341e+06	3.40069	1.21585	0.85968	1.12341
1849	0	2888	14466			2.14686e+06	1.28981e+06	1853386	2.95253	1.15834	0.695921	0.996882
1850	0	2968	14466			2.33301e+06	1.44547e+06	1.99514e+06	3.21101	1.16935	0.724495	1.73358
1851	0	3048	14466			2.18575e+06	1.66683e+06	2.1244e+06	2.68615	1.02888	0.78461	1.47465
1852	0	3128	14466			2572116	1.48242e+06	2.42554e+06	2.69693	1.06043	0.611173	0.621392
1853	0	3208	14466			2541689	1.85757e+06	2.46614e+06	3.09733	1.03064	0.753229	1.62253
1854	0	3288	14466			2.48902e+06	1.84643e+06	2.88088e+06	2.82123	0.863981	0.640927	1.24554
1855	0	3368	14466			3.03968e+06	2167357	3277488	2.77939	0.927441	0.661286	1.22615
1856	0	3448	14466			2.06244e+06	1.43148e+06	2.32098e+06	2.41484	0.88861	0.616759	0.625141
1857	0	3528	14466			2215964	1.23627e+06	2828830	1.728	0.78335	0.437026	0.887639
1858	0	3608	14466			1.64905e+06	1.02346e+06	2507688	1.34589	0.657596	0.408127	0.615114
1859	0	3688	14466			2118856	1.35818e+06	3.1375e+06	1.37765	0.675333	0.432887	0.829666
1860	0	3768	14466			2152565	1.23933e+06	2.74555e+06	1.44367	0.784019	0.451397	1.58181
1861	0	3848	14466			2.053e+06	1.08952e+06	4371664	0.617552	0.469614	0.249224	0.89867
1862	0	3928	14466			1.78061e+06	974013	3801141	0.763582	0.468441	0.256242	0.670736
1863	0	4008	14466			2.06566e+06	1.20184e+06	5252712	0.621462	0.393256	0.228804	0.457598
1864	0	4088	14466			2.82669e+06	1.38268e+06	6.71097e+06	0.583776	0.421204	0.206033	0.675916
1865	0	4168	14466			3102895	1.41784e+06	5837196	0.674254	0.531573	0.242897	0.659126
1866	0	4248	14466			2.66164e+06	1264266	5.94382e+06	0.522307	0.447799	0.212703	0.99111
1867	0	4328	14466			2.24896e+06	1.0079e+06	5.35545e+06	0.528801	0.419938	0.1882	0.712544
1868	0	4408	14466			2.12082e+06	914944	4.80626e+06	0.445573	0.441263	0.190365	0.698166
1869	0	4488	14466			1.82662e+06	709793	5.43484e+06	0.339443	0.336094	0.1306	0.558473
1870	0	4568	14466			2363150	978878	5.74357e+06	0.337272	0.411443	0.17043	0.513201
1871	0	4648	14466			2.77473e+06	1.1921e+06	5107948	0.400221	0.543217	0.233382	0.818851
1872	0	4728	14466			2.60558e+06	988094	3838417	0.606352	0.678816	0.257422	0.843904
1873	0	4808	14466			1.23834e+06	685193	2440583	0.598268	0.507395	0.28075	0.806721
1874	0	4888	14466			2.01565e+06	735372	3342000	0.564938	0.603128	0.220039	0.713044
1875	0	4968	14466			1.53196e+06	617125	2.90204e+06	0.551686	0.527892	0.212652	0.770983
1876	0	5048	14466			2.57101e+06	864996	4.70837e+06	0.45625	0.546051	0.183715	0.812393
1877	0	5128	14466			2.24833e+06	1.05675e+06	5.62828e+06	0.448982	0.399469	0.187757	0.748541
1878	0	5208	14466			2286382	1057509	5.86373e+06	0.393163	0.389919	0.180347	0.590832
1879	0	5288	14466			2.09681e+06	943806	5461043	0.436388	0.383957	0.172825	0.461578
1880	0	5368	14466			1.56175e+06	977840	4228372	0.56207	0.36935	0.231257	0.69716
1881	0	5448	14466			2.30965e+06	1.01068e+06	4542466	0.615977	0.508458	0.222497	0.623985
1882	0	5528	14466			2.16576e+06	1.02779e+06	4620415	0.622312	0.468736	0.222446	0.889583
1883	0	5608	14466			2.19871e+06	1.42573e+06	4.18891e+06	0.912422	0.524889	0.340359	0.843431
1884	0	5688	14466			2846059	2278573	3.38461e+06	2.3425	0.840882	0.673215	1.2862
1885	0	5768	14466			2.87268e+06	2.21077e+06	2.97224e+06	2.69423	0.966504	0.743804	0.989242
1886	0	5848	14466			2.25548e+06	1583421	2.46964e+06	2.44746	0.913281	0.641154	0.862399
1887	0	5928	14466			3.31751e+06	2.16825e+06	3.22983e+06	2.8012	1.02715	0.671321	1.1802
1888	0	6008	14466			3.3548e+06	2.39842e+06	3.30045e+06	2.60388	1.01647	0.726694	1.34205
1889	0	6088	14466			2.8773e+06	2.07318e+06	2.46244e+06	3.16731	1.16848	0.841923	1.31422
1890	0	6168	14466			3.21234e+06	2.03983e+06	2649596	2.91126	1.21239	0.769864	0.733032
1891	0	6248	14466			2.7995e+06	1.46267e+06	2.78521e+06	2.43569	1.00513	0.525156	1.32614
1892	0	6328	14466			2.41398e+06	1.47701e+06	2.2989e+06	2.63263	1.05006	0.642485	0.939044
1893	0	6408	14466			1.99247e+06	872794	2.11833e+06	1.6961	0.940584	0.41202	1.55984
1894	0	6488	14466			3.1252e+06	1.1159e+06	3131981	1.23062	0.997836	0.356291	1.22212
1895	0	6568	14466			3.02685e+06	1.51518e+06	3947419	1.14391	0.766792	0.38384	0.788574
1896	0	6648	14466			3.1319e+06	1.52298e+06	3.80915e+06	1.28964	0.822204	0.39982	1.20284
1897	0	6728	14466			2639045	1.04912e+06	3.55811e+06	1.09751	0.741699	0.294853	1.0972
1898	0	6808	14466			3.6287e+06	1.71042e+06	3.44363e+06	2.39199	1.05374	0.496692	1.00402
1899	0	6888	14466			3.69902e+06	2.03535e+06	4.17071e+06	2.25327	0.886904	0.488011	0.83201
1900	0	6968	14466			3402685	1.32029e+06	4.52169e+06	0.945695	0.752526	0.291991	0.881474
1901	0	7048	14466			3587997	1.3899e+06	5115092	1.07431	0.701453	0.271726	0.988681
1902	0	7128	14466			2299626	1.26248e+06	2.46014e+06	2.76874	0.934753	0.513172	1.14826
1903	0	7208	14466			2.48052e+06	1.34934e+06	2.97069e+06	2.28487	0.834998	0.454218	1.21866
1904	0	7288	14466			2.05643e+06	954998	3.30731e+06	0.90946	0.621784	0.288754	0.691293
1905	0	7368	14466			2.82514e+06	1.10125e+06	4262444	1.32688	0.662799	0.258362	1.02338
1906	0	7448	14466			2.94383e+06	1.68768e+06	2.96832e+06	3.33592	0.991751	0.568564	0.89857
1907	0	7528	14466			2.30731e+06	1.21714e+06	2197168	3.57202	1.05013	0.553957	0.800193
1908	0	7608	14466			2.14295e+06	1.39604e+06	2431003	3.07328	0.881507	0.574267	0.830379
1909	0	7688	14466			2.54443e+06	1.10218e+06	2.61587e+06	2.36577	0.972691	0.421343	0.529757
1910	0	7768	14466			2.08508e+06	1.1835e+06	3.16346e+06	2.0815	0.659114	0.374115	0.504209
1911	0	7848	14466			2.33984e+06	1.05476e+06	3.90297e+06	1.42703	0.599501	0.270244	0.690365
1912	0	7928	14466			2.06623e+06	978436	4095164	1.00738	0.504554	0.238925	0.588171
1913	0	8008	14466			2.05329e+06	999014	4.22972e+06	0.798149	0.485444	0.236189	0.458804
1914	0	8088	14466			1.5358e+06	858598	4.3758e+06	0.818642	0.350975	0.196215	0.549057
1915	0	8168	14466			2.07354e+06	981716	4931225	0.895413	0.420491	0.199082	0.391918
1916	0	8248	14466			1.80229e+06	902132	5.48048e+06	0.613877	0.328856	0.164608	0.312462
1917	0	8328	14466			1.69202e+06	811343	5.02685e+06	0.809888	0.336596	0.161402	0.276025
1918	0	8408	14466			1.92645e+06	847394	5211548	0.638588	0.36965	0.162599	0.410127
1919	0	8488	14466			1.20642e+06	407503	3.48568e+06	0.642138	0.346107	0.116908	0.420964
1920	0	8568	14466			1.19499e+06	419178	4512452	0.426826	0.26482	0.0928936	0.322381
1921	0	8648	14466			1469666	437706	5347437	0.486586	0.274836	0.0818533	0.387194
1922	0	8728	14466			1.24337e+06	537942	5656236	0.327959	0.219823	0.095106	0.301424
1923	0	8808	14466			1.57142e+06	747258	6.40981e+06	0.370191	0.245159	0.11658	0.407115
1924	0	8888	14466			1318148	485995	6.86356e+06	0.235474	0.19205	0.070808	0.317736
1925	0	8968	14466			1.32932e+06	511037	6.33385e+06	0.196899	0.209875	0.0806834	0.350624
1926	0	9048	14466			1.12821e+06	494076	5.73082e+06	0.140981	0.196867	0.0862138	0.231626
1927	0	9128	14466			1.28216e+06	445534	4.66729e+06	0.104647	0.274712	0.0954587	0.308755
1928	0	9208	14466			654641	219903	2.86289e+06	0.218363	0.228664	0.0768117	0.413995
1929	0	568	14386			2131.24	2415.52	2228.3	0.822546	0.956444	1.08402	0.95178
1930	0	648	14386			2131.24	2415.52	2228.3	0.822546	0.956444	1.08402	0.00535907
1931	0	728	14386			253551	2415.52	239888	0.00764055	1.05696	0.0100693	0.95178
1932	0	808	14386			2131.24	2415.52	653753	0.575712	0.00326001	0.00369485	0.00348164
1933	0	888	14386			560469	255397	1.63262e+06	0.370358	0.343295	0.156434	0.63833
1934	0	968	14386			299978	141414	1.09572e+06	0.351567	0.273773	0.129061	0.356744
1935	0	1048	14386			223673	111400	722156	0.459176	0.30973	0.15426	0.54485
1936	0	1128	14386			434258	188356	1120132	0.490654	0.387685	0.168155	0.935218
1937	0	1208	14386			763847	328918	2.02166e+06	0.668238	0.377832	0.162697	0.516095
1938	0	1288	14386			1.7255e+06	813328	3542928	0.672827	0.487026	0.229564	0.37582
1939	0	1368	14386			1.62411e+06	836850	3382367	0.778058	0.48017	0.247415	0.543551
1940	0	1448	14386			2.09597e+06	951922	3704728	1.02139	0.565755	0.256948	0.588896
1941	0	1528	14386			594878	357269	963562	1.41465	0.617374	0.370779	0.747536
1942	0	1608	14386			2.60266e+06	1.35535e+06	3741157	1.94087	0.695684	0.36228	0.807681
1943	0	1688	14386			2.66425e+06	1.27661e+06	2.37188e+06	3.17047	1.12327	0.538226	0.961688
1944	0	1768	14386			1.63123e+06	1.11987e+06	1.75368e+06	3.8543	0.930174	0.638582	0.553928
1945	0	1848	14386			3.04259e+06	2167643	2.13685e+06	4.56235	1.42387	1.01441	0.94898
1946	0	1928	14386			3.79983e+06	2413908	3.2537e+06	3.14293	1.16785	0.741895	1.20486
1947	0	2008	14386			3.72749e+06	1.58441e+06	3811253	1.8256	0.978021	0.415718	0.626372
1948	0	2088	14386			3.42329e+06	2.06736e+06	3.32349e+06	2.41067	1.03003	0.622044	1.3268
1949	0	2168	14386			2.85602e+06	1.72063e+06	2.11252e+06	3.16926	1.35195	0.814492	1.13813
1950	0	2248	14386			1.48745e+06	742732	1.39098e+06	2.49818	1.06935	0.533962	1.37471
1951	0	2328	14386			1.08776e+06	573785	1.00925e+06	2.77723	1.07779	0.568526	1.15683
1952	0	2408	14386			650664	312912	590576	2.42666	1.10175	0.529842	1.09298
1953	0	2488	14386			600137	325212	617790	2.27881	0.971426	0.526412	2.04958
1954	0	2568	14386			808062	410574	703746	2.47845	1.14823	0.583413	1.78074
1955	0	2648	14386			2.07347e+06	1.5885e+06	1.8668e+06	3.05145	1.11071	0.850919	1.41061
1956	0	2728	14386			2.42916e+06	1.74671e+06	2296333	3.29558	1.05784	0.76065	0.60179
1957	0	2808	14386			2674955	1.90251e+06	2.37022e+06	3.35859	1.12857	0.802671	1.35718
1958	0	2888	14386			2420584	1.61238e+06	2.36318e+06	3.12649	1.02429	0.682293	0.82337
1959	0	2968	14386			2.32561e+06	1670653	2.28362e+06	2.93147	1.01839	0.731581	1.45782
1960	0	3048	14386			2.31739e+06	1445409	1.93825e+06	3.36808	1.19561	0.74573	1.30942
1961	0	3128	14386			3.03426e+06	1.91104e+06	2.4518e+06	3.77659	1.23756	0.779442	1.24767
1962	0	3208	14386			2.96102e+06	1.68418e+06	2.79095e+06	2.62823	1.06093	0.603442	0.920673
1963	0	3288	14386			2839581	1.53199e+06	3898033	1.44749	0.728465	0.393016	0.651394
1964	0	3368	14386			2.82716e+06	1.84482e+06	4.64588e+06	1.12677	0.60853	0.397086	0.614605
1965	0	3448	14386			2.24185e+06	1.51667e+06	4413140	0.961077	0.507994	0.343672	0.645775
1966	0	3528	14386			1.71897e+06	1146872	4.06943e+06	0.915103	0.42241	0.281826	0.636048
1967	0	3608	14386			1.89536e+06	1.21267e+06	4483284	0.710422	0.422762	0.270487	0.595515
1968	0	3688	14386			2.1776e+06	1371159	5.11939e+06	0.766141	0.425364	0.267836	0.666252
1969	0	3768	14386			2.33559e+06	1.26736e+06	4668166	0.733679	0.500323	0.27149	0.440355
1970	0	3848	14386			2472123	1069864	3.75712e+06	0.858762	0.657983	0.284756	0.444987
1971	0	3928	14386			2281894	975475	5.40829e+06	0.492226	0.421925	0.180367	0.438689
1972	0	4008	14386			2.19471e+06	749834	4.4572e+06	0.579572	0.492396	0.16823	0.575674
1973	0	4088	14386			2402254	1.13385e+06	5.42982e+06	0.471313	0.442419	0.20882	0.376784
1974	0	4168	14386			2.38892e+06	1.13658e+06	6.55409e+06	0.385577	0.364493	0.173416	0.586583
1975	0	4248	14386			2.39397e+06	1.11158e+06	6513874	0.465951	0.367519	0.170648	0.607108
1976	0	4328	14386			2.52264e+06	1.19801e+06	7037853	0.345656	0.358439	0.170224	0.629637
1977	0	4408	14386			2152379	983565	5.388e+06	0.371405	0.399477	0.182547	0.607736
1978	0	4488	14386			2.06504e+06	878826	4775513	0.393043	0.432422	0.184028	0.431073
1979	0	4568	14386			2.34902e+06	992374	5200235	0.426625	0.451714	0.190833	0.755112
1980	0	4648	14386			3.11641e+06	852215	4.13874e+06	0.541819	0.752986	0.205912	0.947187
1981	0	4728	14386			2.6968e+06	902693	3.82592e+06	0.558485	0.704876	0.235942	1.06522
1982	0	4808	14386			3241313	791656	4464334	0.535565	0.726046	0.177329	1.24288
1983	0	4888	14386			2.54594e+06	1.01191e+06	3696615	0.676074	0.688721	0.27374	0.814663
1984	0	4968	14386			2.48974e+06	918615	3.88385e+06	0.617655	0.641049	0.236522	0.915096
1985	0	5048	14386			2.28284e+06	982047	3.58819e+06	0.605526	0.636208	0.273689	0.781673
1986	0	5128	14386			3.19694e+06	2.17226e+06	4.18086e+06	0.996558	0.764661	0.519573	0.612931
1987	0	5208	14386			2.44256e+06	1244512	5431212	0.450831	0.449726	0.229141	0.576975
1988	0	5288	14386			2167136	990018	5576617	0.386796	0.388611	0.17753	0.563606
1989	0	5368	14386			2.02286e+06	1.02748e+06	4306579	0.549867	0.469713	0.238583	0.353697
1990	0	5448	14386			1.77097e+06	707660	4208842	0.65374	0.420775	0.168137	1.09609
1991	0	5528	14386			2.20345e+06	1.10329e+06	4.15755e+06	0.634122	0.529989	0.26537	0.601792
1992	0	5608	14386			2785200	1.185e+06	3479039	1.04654	0.800566	0.340611	0.640529
1993	0	5688	14386			2.36118e+06	1449285	3.23106e+06	1.30965	0.730776	0.448547	0.929884
1994	0	5768	14386			2503911	1513141	3.6959e+06	1.42675	0.677483	0.40941	0.575316
1995	0	5848	14386			2.63394e+06	1.5814e+06	3.07595e+06	1.75375	0.856301	0.514119	0.787075
1996	0	5928	14386			2.62501e+06	1.6724e+06	3.15737e+06	2.06508	0.831391	0.529681	0.663731
1997	0	6008	14386			2.92303e+06	2.09351e+06	2.8234e+06	2.80256	1.03529	0.741487	0.762833
1998	0	6088	14386			2.98829e+06	1.9374e+06	3008146	2.66931	0.993398	0.644051	1.82471
[truncated: 50,088 more rows]
