# Supplementary material for: Untargeted pixel-by-pixel metabolite ratio imaging as a novel tool for biomedical discovery in mass spectrometry imaging
Source: eLife. 2025 Mar 18;13:RP96892. doi: 10.7554/eLife.96892 (PMC11919253; doi:10.7554/eLife.96892)
Supplement: Figure 3—source data 1. [file elife-96892-fig3-data1.xlsx]

## Sheet: Figure 3 B-H
soptId	raster	x	y	z	Date	Hexose Phosphate/Hexose	FA 18:1/FA 18:0	FA 18:0 /FA 16:0	FA 22:6/ FA 20:4	LPE 20:4 /LPE 22:6	PE 38:4/LPE 20:4	PE 38:4/LPE 18:0
3590	Regions/em	713.064	1297.34	0		0.0430426	0.376855	3.21678	0.854039	0.344821	0.494442	1.0886
3591	Regions/em	723.064	1297.34	0		0.0371213	0.433314	3.29782	1.08994	0.274367	0.739271	1.44874
3592	Regions/em	733.064	1297.34	0		0.0322967	0.325198	2.95391	0.950605	0.266721	0.779884	1.88808
3593	Regions/em	743.064	1297.34	0		0.0428477	0.334457	2.85222	0.969489	0.233184	0.661041	0.954896
3594	Regions/em	753.064	1297.34	0		0.0428973	0.372222	3.84667	0.907389	0.254409	0.725603	1.45597
3595	Regions/em	763.064	1297.34	0		0.0385938	0.453918	2.86565	0.965434	0.232059	0.823154	1.64218
3596	Regions/em	773.064	1297.34	0		0.0474729	0.39302	3.24062	1.0153	0.21187	0.722366	1.51033
3597	Regions/em	783.064	1297.34	0		0.0623577	0.293489	3.6307	1.11716	0.199817	0.872007	1.43669
3598	Regions/em	793.064	1297.34	0		0.0468775	0.2746	4.30442	0.955	0.244385	0.612625	1.07752
3599	Regions/em	803.064	1297.34	0		0.044875	0.462927	2.82041	1.02508	0.176561	0.843606	1.68628
3600	Regions/em	813.064	1297.34	0		0.035038	0.409465	3.77249	1.19078	0.202324	0.757713	1.73708
3601	Regions/em	823.064	1297.34	0		0.0410943	0.502314	3.45985	1.29748	0.194712	0.779904	1.68473
3602	Regions/em	833.064	1297.34	0		0.0286763	0.425869	3.38496	1.21714	0.189637	0.756019	1.44627
3603	Regions/em	843.064	1297.34	0		0.0318592	0.437499	4.06008	1.10768	0.163778	0.872598	1.4816
3604	Regions/em	853.064	1297.34	0		0.0393028	0.491507	3.73109	1.21622	0.166945	0.786736	1.20796
3605	Regions/em	863.064	1297.34	0		0.0424771	0.451591	2.98512	1.27507	0.180512	0.713339	1.14394
3606	Regions/em	873.064	1297.34	0		0.0396278	0.442885	3.193	1.17747	0.189773	0.873197	1.60884
3607	Regions/em	883.064	1297.34	0		0.0371147	0.399071	3.48539	1.12996	0.159049	0.979384	1.63965
3608	Regions/em	893.064	1297.34	0		0.0564192	0.454062	3.27556	1.18544	0.175323	0.794688	1.55884
3609	Regions/em	903.064	1297.34	0		0.062413	0.520047	3.01179	1.31	0.173303	0.736227	1.23946
3610	Regions/em	913.064	1297.34	0		0.0396873	0.410915	2.88338	1.0848	0.17574	0.733655	1.35712
3611	Regions/em	923.064	1297.34	0		0.0605118	0.543591	2.56192	1.07252	0.146135	0.928016	1.43789
3612	Regions/em	933.064	1297.34	0		0.0553124	0.37812	3.52247	1.04467	0.167381	0.933262	1.55283
3789	Regions/em	633.064	1287.34	0		0.0408132	0.367836	3.70118	0.891731	0.214188	0.764192	1.24257
3790	Regions/em	643.064	1287.34	0		0.0521347	0.320425	3.17915	0.999453	0.22582	0.749699	1.15732
3791	Regions/em	653.064	1287.34	0		0.0353116	0.306658	3.90224	1.1953	0.239529	0.615946	1.26877
3792	Regions/em	663.064	1287.34	0		0.0310819	0.321667	3.27723	1.05606	0.274389	0.586011	1.40433
3793	Regions/em	673.064	1287.34	0		0.0419089	0.30292	3.35559	0.885547	0.33856	0.485666	1.37823
3794	Regions/em	683.064	1287.34	0		0.0859668	0.265278	3.491	0.825527	0.341426	0.463194	0.865151
3795	Regions/em	693.064	1287.34	0		0.0413047	0.338459	3.09746	0.908237	0.359182	0.45045	1.16674
3796	Regions/em	703.064	1287.34	0		0.0512631	0.304874	3.65406	0.83443	0.352433	0.436602	1.15411
3797	Regions/em	713.064	1287.34	0		0.0449491	0.327519	2.88383	0.906025	0.311592	0.536893	1.12287
3798	Regions/em	723.064	1287.34	0		0.0461973	0.393271	2.72858	0.810262	0.41276	0.298767	0.626092
3799	Regions/em	733.064	1287.34	0		0.0379777	0.492361	2.81656	0.929293	0.266745	0.521661	0.816014
3800	Regions/em	743.064	1287.34	0		0.052125	0.33048	2.94177	0.90512	0.273385	0.590582	1.02191
3801	Regions/em	753.064	1287.34	0		0.0501526	0.363029	3.83073	0.84198	0.276972	0.495822	1.18464
3802	Regions/em	763.064	1287.34	0		0.0643095	0.371098	3.53621	0.881262	0.275754	0.508094	1.01463
3803	Regions/em	773.064	1287.34	0		0.0492868	0.330297	3.67398	0.976228	0.229858	0.570433	1.26133
3804	Regions/em	783.064	1287.34	0		0.065441	0.343652	3.22762	0.947694	0.225604	0.715014	1.32096
3805	Regions/em	793.064	1287.34	0		0.0362321	0.3702	3.43813	0.952308	0.25522	0.602346	1.48861
3806	Regions/em	803.064	1287.34	0		0.0461276	0.363492	3.61795	1.06424	0.223617	0.836068	1.65837
3807	Regions/em	813.064	1287.34	0		0.0397323	0.404152	3.51509	0.99418	0.193418	0.71663	1.37664
3808	Regions/em	823.064	1287.34	0		0.0355035	0.434011	4.01732	1.1052	0.190483	0.819014	1.37881
3809	Regions/em	833.064	1287.34	0		0.0499833	0.418349	3.29981	1.05306	0.225514	0.66084	1.44025
3810	Regions/em	843.064	1287.34	0		0.0408511	0.366904	3.73555	1.04063	0.197803	0.860993	1.33511
3811	Regions/em	853.064	1287.34	0		0.0422873	0.389362	4.24818	1.11242	0.206349	0.820777	1.47404
3812	Regions/em	863.064	1287.34	0		0.0443227	0.381838	3.37724	1.08963	0.206667	0.703008	1.36304
3813	Regions/em	873.064	1287.34	0		0.0443362	0.408158	3.18456	0.990078	0.20577	0.693728	1.16771
3814	Regions/em	883.064	1287.34	0		0.0505652	0.320247	4.11393	1.07166	0.18535	0.816846	1.34703
3815	Regions/em	893.064	1287.34	0		0.0567578	0.390241	3.33868	1.18478	0.184191	0.747911	1.66067
3816	Regions/em	903.064	1287.34	0		0.0657065	0.39044	4.22524	1.14116	0.171784	0.752062	1.59162
3817	Regions/em	913.064	1287.34	0		0.0529994	0.399799	3.17982	1.18844	0.194953	0.664641	1.34685
3818	Regions/em	923.064	1287.34	0		0.0736962	0.45897	3.94627	1.07463	0.167893	0.803119	1.35925
3819	Regions/em	933.064	1287.34	0		0.0369222	0.457223	3.13954	1.06832	0.194652	0.728352	1.66013
3820	Regions/em	943.064	1287.34	0		0.0570321	0.453231	3.50103	1.04519	0.17613	0.940564	1.87439
3821	Regions/em	953.064	1287.34	0		0.0572669	0.451449	3.28389	1.25415	0.181995	0.744788	1.40555
3822	Regions/em	963.064	1287.34	0		0.0560107	0.497563	2.55127	1.06097	0.185498	0.633077	0.963046
3823	Regions/em	973.064	1287.34	0		0.0514556	0.504417	2.95944	1.20241	0.178347	0.830679	1.36516
3824	Regions/em	983.064	1287.34	0		0.0606648	0.493059	3.26102	1.06889	0.19062	0.677105	1.05756
3825	Regions/em	993.064	1287.34	0		0.0758796	0.38657	4.09234	0.995319	0.179825	0.658334	0.953293
3826	Regions/em	1003.06	1287.34	0		0.0555058	0.528851	3.73765	0.975896	0.188801	0.83771	1.38881
3994	Regions/em	613.064	1277.34	0		0.0423532	0.351076	3.05299	1.08484	0.247237	0.553839	0.980628
3995	Regions/em	623.064	1277.34	0		0.0560421	0.377704	3.21603	1.08105	0.226808	0.786473	1.3017
3996	Regions/em	633.064	1277.34	0		0.0430862	0.298502	3.58389	0.960847	0.242882	0.786603	1.18107
3997	Regions/em	643.064	1277.34	0		0.035916	0.280546	3.66559	1.07529	0.277408	0.614667	1.32143
3998	Regions/em	653.064	1277.34	0		0.0481692	0.259943	4.2063	0.923282	0.257544	0.65885	1.17233
3999	Regions/em	663.064	1277.34	0		0.0693669	0.290372	3.6047	0.822424	0.292925	0.615922	1.19098
4000	Regions/em	673.064	1277.34	0		0.0680606	0.296246	2.6682	0.911567	0.309685	0.509315	0.908523
4001	Regions/em	683.064	1277.34	0		0.0595412	0.332149	3.06737	0.862416	0.389306	0.432865	1.08821
4002	Regions/em	693.064	1277.34	0		0.0534018	0.37701	2.58241	0.871771	0.37245	0.421025	1.30964
4003	Regions/em	703.064	1277.34	0		0.0511931	0.309932	2.3589	0.784637	0.410467	0.417747	1.01767
4004	Regions/em	713.064	1277.34	0		0.0534504	0.344804	2.78799	0.812843	0.40799	0.398124	1.06968
4005	Regions/em	723.064	1277.34	0		0.0735517	0.407447	2.60511	0.768506	0.403188	0.45678	1.02686
4006	Regions/em	733.064	1277.34	0		0.0800894	0.343369	3.0743	0.7697	0.369433	0.374374	0.692018
4007	Regions/em	743.064	1277.34	0		0.0612675	0.29459	3.23399	0.857195	0.329259	0.418359	0.839396
4008	Regions/em	753.064	1277.34	0		0.0461527	0.519267	3.00432	0.948837	0.323191	0.48728	1.43644
4009	Regions/em	763.064	1277.34	0		0.0678627	0.335966	2.87524	0.850438	0.331622	0.490503	1.22716
4010	Regions/em	773.064	1277.34	0		0.0604185	0.362959	4.4867	0.809812	0.270972	0.457464	1.02312
4011	Regions/em	783.064	1277.34	0		0.0690544	0.41983	2.98792	0.938984	0.278217	0.605433	1.52696
4012	Regions/em	793.064	1277.34	0		0.0614882	0.423401	4.30664	0.919154	0.321015	0.466231	1.66728
4013	Regions/em	803.064	1277.34	0		0.04397	0.43904	3.18997	0.881798	0.320472	0.518058	1.03975
4014	Regions/em	813.064	1277.34	0		0.0567347	0.412365	2.92017	0.846359	0.317901	0.523932	1.51931
4015	Regions/em	823.064	1277.34	0		0.0385611	0.325984	3.25444	0.934651	0.279882	0.71032	1.80825
4016	Regions/em	833.064	1277.34	0		0.0435404	0.323876	3.79217	0.784755	0.274838	0.663973	1.35105
4017	Regions/em	843.064	1277.34	0		0.0414529	0.444029	3.20461	1.02545	0.29435	0.565629	1.44305
4018	Regions/em	853.064	1277.34	0		0.0417057	0.37816	3.76067	0.943248	0.233561	0.721515	1.03254
4019	Regions/em	863.064	1277.34	0		0.0481371	0.455217	3.66216	0.957352	0.232738	0.667352	1.11106
4020	Regions/em	873.064	1277.34	0		0.0452599	0.453771	2.76114	1.09669	0.234349	0.746641	1.23863
4021	Regions/em	883.064	1277.34	0		0.0508236	0.463238	2.93229	1.0162	0.219941	0.710224	1.17893
4022	Regions/em	893.064	1277.34	0		0.0425776	0.40533	2.89571	1.04112	0.227431	0.687733	1.35429
4023	Regions/em	903.064	1277.34	0		0.0617512	0.370611	3.73661	1.02827	0.184436	0.749358	1.16511
4024	Regions/em	913.064	1277.34	0		0.0711922	0.456875	3.44752	1.01892	0.202642	0.695764	1.23657
4025	Regions/em	923.064	1277.34	0		0.0813045	0.395342	3.63825	0.96201	0.215445	0.690953	1.26876
4026	Regions/em	933.064	1277.34	0		0.0873977	0.530657	2.774	1.09667	0.21176	0.744441	1.50264
4027	Regions/em	943.064	1277.34	0		0.0768396	0.385793	3.38183	1.0164	0.21739	0.706781	1.25686
4028	Regions/em	953.064	1277.34	0		0.0703643	0.374483	3.65929	0.874648	0.206616	0.641394	1.08928
4029	Regions/em	963.064	1277.34	0		0.0740021	0.440034	3.49168	0.866055	0.224717	0.687471	1.20517
4030	Regions/em	973.064	1277.34	0		0.059544	0.48913	3.14654	1.03137	0.200596	0.813345	1.48785
4031	Regions/em	983.064	1277.34	0		0.0588885	0.481709	3.41157	0.987822	0.201376	0.848022	1.71431
4032	Regions/em	993.064	1277.34	0		0.0442266	0.504568	3.43193	1.15605	0.212403	0.736404	1.40619
4033	Regions/em	1003.06	1277.34	0		0.0568903	0.457444	3.63767	1.08254	0.200839	0.64297	0.97147
4034	Regions/em	1013.06	1277.34	0		0.052193	0.452058	3.06869	0.972772	0.182021	0.752754	1.00933
4035	Regions/em	1023.06	1277.34	0		0.0512052	0.427082	4.42223	0.998433	0.210388	0.592879	1.07877
4036	Regions/em	1033.06	1277.34	0		0.0400861	0.478225	3.78911	1.07869	0.216044	0.594614	1.2175
4037	Regions/em	1043.06	1277.34	0		0.0466119	0.439202	4.35735	1.08877	0.215354	0.658917	1.54452
4038	Regions/em	1053.06	1277.34	0		0.0462582	0.501063	3.8883	1.13911	0.216406	0.755396	1.58826
4200	Regions/em	603.064	1267.34	0		0.0500726	0.324884	3.78793	1.03135	0.23658	0.63584	1.35196
4201	Regions/em	613.064	1267.34	0		0.0457264	0.357559	2.89493	0.986812	0.259649	0.609238	1.38851
4202	Regions/em	623.064	1267.34	0		0.0645759	0.333821	3.29889	0.95027	0.260341	0.667683	1.14641
4203	Regions/em	633.064	1267.34	0		0.0473303	0.298127	3.22861	0.837716	0.264397	0.676432	1.36983
4204	Regions/em	643.064	1267.34	0		0.0361825	0.303638	3.28732	1.04	0.305922	0.71567	1.29222
4205	Regions/em	653.064	1267.34	0		0.0549978	0.306015	3.05253	0.772354	0.266128	0.602772	1.03778
4206	Regions/em	663.064	1267.34	0		0.0650416	0.339012	3.43089	0.806203	0.315094	0.598787	1.29994
4207	Regions/em	673.064	1267.34	0		0.0874901	0.292007	3.25662	0.763855	0.276752	0.683498	1.13975
4208	Regions/em	683.064	1267.34	0		0.0550305	0.32753	2.72402	0.81	0.35477	0.493901	1.46174
4209	Regions/em	693.064	1267.34	0		0.057324	0.389895	2.83307	0.819546	0.430138	0.426097	1.24069
4210	Regions/em	703.064	1267.34	0		0.0351516	0.377789	2.77223	0.875192	0.485295	0.365159	0.952441
4211	Regions/em	713.064	1267.34	0		0.0584809	0.357306	2.80794	0.781185	0.507836	0.355701	1.15457
4212	Regions/em	723.064	1267.34	0		0.0749239	0.384348	3.21719	0.766135	0.480744	0.367061	0.977057
4213	Regions/em	733.064	1267.34	0		0.0738101	0.353189	2.78802	0.757863	0.424379	0.443717	1.07773
4214	Regions/em	743.064	1267.34	0		0.0737879	0.408605	2.89658	0.853631	0.424526	0.700279	1.47772
4215	Regions/em	753.064	1267.34	0		0.0892926	0.353937	2.67671	0.692544	0.415891	0.558959	1.47419
4216	Regions/em	763.064	1267.34	0		0.0752875	0.428577	2.50634	0.81068	0.37698	0.403302	1.0976
4217	Regions/em	773.064	1267.34	0		0.0587041	0.391837	3.04345	0.797309	0.442324	0.388852	1.26692
4218	Regions/em	783.064	1267.34	0		0.0552658	0.484669	3.49435	1.06469	0.400099	0.465158	1.40369
4219	Regions/em	793.064	1267.34	0		0.0566347	0.577254	2.10188	0.809	0.442724	0.445276	1.62573
4220	Regions/em	803.064	1267.34	0		0.0473573	0.419111	3.37234	0.702354	0.432782	0.576547	1.7278
4221	Regions/em	813.064	1267.34	0		0.0414029	0.434676	3.16241	0.785454	0.422513	0.499701	1.47851
4222	Regions/em	823.064	1267.34	0		0.0502548	0.359474	3.2149	0.713002	0.495022	0.464928	1.33107
4223	Regions/em	833.064	1267.34	0		0.041079	0.420127	3.86983	0.760567	0.445477	0.58592	1.45577
4224	Regions/em	843.064	1267.34	0		0.036395	0.34224	3.77689	0.792251	0.382661	0.561201	1.89373
4225	Regions/em	853.064	1267.34	0		0.0579555	0.378705	3.42371	0.827976	0.367438	0.456016	0.962868
4226	Regions/em	863.064	1267.34	0		0.0403213	0.476854	3.62346	0.841125	0.313432	0.559986	1.5184
4227	Regions/em	873.064	1267.34	0		0.0465441	0.520272	3.43606	0.91635	0.322273	0.481595	1.3598
4228	Regions/em	883.064	1267.34	0		0.0406747	0.447601	3.42155	0.943305	0.290976	0.53387	1.10197
4229	Regions/em	893.064	1267.34	0		0.0397624	0.390767	3.27752	1.00588	0.303091	0.677991	1.51274
4230	Regions/em	903.064	1267.34	0		0.0592847	0.400087	3.21532	0.836185	0.273175	0.71129	1.52191
4231	Regions/em	913.064	1267.34	0		0.0549473	0.448472	3.47302	0.897896	0.282945	0.564201	1.25871
4232	Regions/em	923.064	1267.34	0		0.0489417	0.478783	3.89921	0.980774	0.273928	0.641733	1.31284
4233	Regions/em	933.064	1267.34	0		0.0516605	0.495507	3.29118	1.04464	0.269035	0.555654	0.845669
4234	Regions/em	943.064	1267.34	0		0.0735133	0.44803	3.39347	0.876171	0.230317	0.701424	1.44479
4235	Regions/em	953.064	1267.34	0		0.0597285	0.461962	4.06829	0.935648	0.23505	0.651426	1.46305
4236	Regions/em	963.064	1267.34	0		0.0618408	0.428804	3.55043	0.891176	0.231391	0.77807	1.43075
4237	Regions/em	973.064	1267.34	0		0.0442246	0.523567	3.32051	1.06826	0.224361	0.807377	1.56219
4238	Regions/em	983.064	1267.34	0		0.0520892	0.509651	3.50482	0.980469	0.239504	0.7901	1.46897
4239	Regions/em	993.064	1267.34	0		0.0431891	0.594847	3.41123	1.08516	0.224531	0.616781	1.075
4240	Regions/em	1003.06	1267.34	0		0.0535317	0.614096	3.08018	1.00119	0.249525	0.585241	1.35347
4241	Regions/em	1013.06	1267.34	0		0.0637752	0.513501	4.19099	1.03501	0.235907	0.780562	1.40962
4242	Regions/em	1023.06	1267.34	0		0.0597768	0.443609	4.01519	0.939323	0.221448	0.679696	1.41847
4243	Regions/em	1033.06	1267.34	0		0.0533993	0.414493	3.45047	0.979544	0.217497	0.666233	1.25861
4244	Regions/em	1043.06	1267.34	0		0.0473558	0.561548	3.83805	1.01661	0.248545	0.672526	1.6949
4245	Regions/em	1053.06	1267.34	0		0.0536568	0.442594	3.86607	1.05236	0.23626	0.660588	1.32383
4246	Regions/em	1063.06	1267.34	0		0.0504635	0.450376	3.03033	1.12269	0.236613	0.655708	1.48676
4247	Regions/em	1073.06	1267.34	0		0.0503901	0.418381	3.36421	0.903735	0.247384	0.642207	1.38185
4248	Regions/em	1083.06	1267.34	0		0.0583793	0.477745	3.88444	0.996609	0.247731	0.584709	1.55311
4249	Regions/em	1093.06	1267.34	0		0.0449319	0.493843	3.33584	1.06522	0.229317	0.792215	1.73184
4250	Regions/em	1103.06	1267.34	0		0.0617894	0.378706	2.79794	1.04277	0.237456	0.648494	1.10532
4405	Regions/em	583.064	1257.34	0		0.0593204	0.299962	3.73274	1.09318	0.217103	0.535173	0.954899
4406	Regions/em	593.064	1257.34	0		0.0417131	0.387549	3.0495	1.09319	0.28844	0.513328	1.36804
4407	Regions/em	603.064	1257.34	0		0.0653249	0.33403	3.43433	0.995345	0.30371	0.448659	1.07912
4408	Regions/em	613.064	1257.34	0		0.0560771	0.314486	3.56996	1.0427	0.300495	0.403701	1.36218
4409	Regions/em	623.064	1257.34	0		0.0541348	0.371997	3.02902	0.952049	0.282602	0.477622	0.981055
4410	Regions/em	633.064	1257.34	0		0.0597733	0.342756	3.13363	0.914228	0.314915	0.479914	0.921727
4411	Regions/em	643.064	1257.34	0		0.0465448	0.461152	3.15185	0.971856	0.328254	0.553276	1.45769
4412	Regions/em	653.064	1257.34	0		0.0692303	0.3095	3.63098	0.786965	0.316251	0.6283	1.33419
4413	Regions/em	663.064	1257.34	0		0.0857469	0.352465	2.76652	0.705143	0.312168	0.635454	1.15074
4414	Regions/em	673.064	1257.34	0		0.0732365	0.33696	2.57375	0.771271	0.371713	0.493711	1.22373
4415	Regions/em	683.064	1257.34	0		0.0729695	0.318824	3.01362	0.763031	0.419997	0.395155	0.880909
4416	Regions/em	693.064	1257.34	0		0.0478986	0.443654	2.36821	0.814509	0.412216	0.409237	1.08492
4417	Regions/em	703.064	1257.34	0		0.0564688	0.347524	2.81214	0.901976	0.496182	0.346312	0.877077
4418	Regions/em	713.064	1257.34	0		0.0652188	0.317418	2.64136	0.795377	0.486947	0.51283	1.25513
4419	Regions/em	723.064	1257.34	0		0.0407714	0.512071	2.47695	0.942457	0.473415	0.4363	1.10099
4420	Regions/em	733.064	1257.34	0		0.0409217	0.30526	3.2114	0.751359	0.54808	0.41499	1.29399
4421	Regions/em	743.064	1257.34	0		0.0744862	0.331053	3.05193	0.654559	0.588931	0.351341	1.04734
4422	Regions/em	753.064	1257.34	0		0.0559563	0.416322	2.92881	0.775319	0.472559	0.542567	1.38433
4423	Regions/em	763.064	1257.34	0		0.0472662	0.420787	3.11301	0.817327	0.461098	0.418657	1.04631
4424	Regions/em	773.064	1257.34	0		0.0498255	0.388569	3.13718	0.727431	0.447344	0.458685	1.06157
4425	Regions/em	783.064	1257.34	0		0.047798	0.405599	2.8089	0.808253	0.438505	0.346143	1.11881
4426	Regions/em	793.064	1257.34	0		0.0473574	0.569523	2.50997	0.87312	0.488369	0.22858	0.697583
4427	Regions/em	803.064	1257.34	0		0.0515339	0.328657	3.67941	0.783869	0.442523	0.444513	1.07987
4428	Regions/em	813.064	1257.34	0		0.0525978	0.367572	2.98432	0.652795	0.532388	0.471161	1.43117
4429	Regions/em	823.064	1257.34	0		0.0621999	0.373849	2.6074	0.705605	0.535637	0.5176	1.21718
4430	Regions/em	833.064	1257.34	0		0.0568562	0.353838	2.7039	0.748407	0.489984	0.466018	1.41265
4431	Regions/em	843.064	1257.34	0		0.0433626	0.415786	3.03826	0.765015	0.375989	0.549193	1.0823
4432	Regions/em	853.064	1257.34	0		0.0378163	0.542903	2.75071	0.809013	0.337798	0.821381	1.47397
4433	Regions/em	863.064	1257.34	0		0.0316209	0.458384	3.25085	0.81053	0.304096	0.792685	1.40602
4434	Regions/em	873.064	1257.34	0		0.0316475	0.422997	3.03404	0.824051	0.383153	0.473987	1.1266
4435	Regions/em	883.064	1257.34	0		0.0344788	0.406408	3.11033	0.901	0.279761	0.712141	0.968819
4436	Regions/em	893.064	1257.34	0		0.0330394	0.44304	2.02104	0.691143	0.237468	0.728587	0.862611
4437	Regions/em	903.064	1257.34	0		0.0412785	0.419743	2.8784	0.73751	0.305364	0.854277	1.31171
4438	Regions/em	913.064	1257.34	0		0.0496796	0.409229	3.09841	0.835467	0.384593	0.6435	1.29386
4439	Regions/em	923.064	1257.34	0		0.0434285	0.435262	3.21496	0.847862	0.373368	0.629092	1.54619
4440	Regions/em	933.064	1257.34	0		0.0445798	0.445439	3.62924	0.858614	0.272051	0.62705	1.29437
4441	Regions/em	943.064	1257.34	0		0.036175	0.473129	3.06868	0.914204	0.313747	0.592271	1.51027
4442	Regions/em	953.064	1257.34	0		0.0369902	0.466246	3.05934	0.910865	0.215269	0.869863	1.347
4443	Regions/em	963.064	1257.34	0		0.0382146	0.479312	2.82983	0.908032	0.278716	0.915523	2.17936
4444	Regions/em	973.064	1257.34	0		0.0376549	0.431106	3.0639	0.903538	0.265716	0.8215	1.7279
4445	Regions/em	983.064	1257.34	0		0.0485472	0.481125	4.88436	0.956612	0.294937	0.708459	2.07675
4446	Regions/em	993.064	1257.34	0		0.0371201	0.514511	3.65674	1.09442	0.288873	0.610132	1.26421
4447	Regions/em	1003.06	1257.34	0		0.047644	0.526346	3.45606	0.923522	0.257611	0.582857	1.11296
4448	Regions/em	1013.06	1257.34	0		0.0712247	0.44384	3.61788	0.945608	0.261681	0.504593	0.976421
4449	Regions/em	1023.06	1257.34	0		0.0676895	0.481057	2.8502	0.804898	0.23434	0.67783	1.09772
4450	Regions/em	1033.06	1257.34	0		0.0478442	0.462359	3.54045	0.881345	0.274974	0.584144	1.3688
4451	Regions/em	1043.06	1257.34	0		0.0370981	0.459467	3.25805	0.686588	0.329541	0.55453	1.53524
4452	Regions/em	1053.06	1257.34	0		0.0778617	0.484152	3.261	0.886895	0.364092	0.470075	1.11393
4453	Regions/em	1063.06	1257.34	0		0.0932559	0.469576	3.55312	0.839045	0.32472	0.430306	1.09441
4454	Regions/em	1073.06	1257.34	0		0.0523272	0.582417	3.294	0.96691	0.279345	0.537579	1.1633
4455	Regions/em	1083.06	1257.34	0		0.0581888	0.451639	4.27333	1.02653	0.2537	0.549909	1.14969
4456	Regions/em	1093.06	1257.34	0		0.0642224	0.379868	3.79421	1.00639	0.255659	0.667081	1.73063
4457	Regions/em	1103.06	1257.34	0		0.0593089	0.465643	3.0882	1.01092	0.249581	0.707085	1.3897
4458	Regions/em	1113.06	1257.34	0		0.0436199	0.445844	3.9668	0.980282	0.245703	0.648601	1.38311
4459	Regions/em	1123.06	1257.34	0		0.0463281	0.395657	3.15183	0.960087	0.246608	0.702537	1.51553
4460	Regions/em	1133.06	1257.34	0		0.0571948	0.469072	3.16074	0.969193	0.251843	0.632666	1.72489
4461	Regions/em	1143.06	1257.34	0		0.056211	0.525851	2.91774	0.988109	0.274711	0.645213	1.45995
4462	Regions/em	1153.06	1257.34	0		0.0910309	0.384764	3.19406	0.847	0.28565	0.689831	1.26111
4610	Regions/em	563.064	1247.34	0		0.0665331	0.306357	3.10873	1.08346	0.208829	0.66938	1.31042
4611	Regions/em	573.064	1247.34	0		0.0515068	0.254804	3.93781	1.1373	0.246787	0.706703	1.56577
4612	Regions/em	583.064	1247.34	0		0.0563286	0.367223	3.39483	1.14358	0.285201	0.522738	1.37628
4613	Regions/em	593.064	1247.34	0		0.0461617	0.355838	3.52883	1.01238	0.287979	0.592407	1.76315
4614	Regions/em	603.064	1247.34	0		0.0359689	0.364685	2.90448	0.930606	0.312842	0.619664	1.63174
4615	Regions/em	613.064	1247.34	0		0.044269	0.477752	3.00624	1.10226	0.312524	0.550379	1.09327
4616	Regions/em	623.064	1247.34	0		0.0544159	0.392426	3.16592	0.919813	0.353518	0.424338	1.23073
4617	Regions/em	633.064	1247.34	0		0.0570461	0.367408	3.01414	0.845407	0.344765	0.526807	1.58532
4618	Regions/em	643.064	1247.34	0		0.0600567	0.354323	4.08644	0.772622	0.351861	0.467501	1.20324
4619	Regions/em	653.064	1247.34	0		0.0624576	0.404556	3.39149	0.940838	0.374512	0.522231	1.24798
4620	Regions/em	663.064	1247.34	0		0.0664403	0.347848	3.19058	0.728447	0.371568	0.511042	1.2013
4621	Regions/em	673.064	1247.34	0		0.0616741	0.393555	2.75386	0.785627	0.316148	0.610437	1.25332
4622	Regions/em	683.064	1247.34	0		0.0657528	0.487705	2.99711	0.818	0.334926	0.475697	0.844953
4623	Regions/em	693.064	1247.34	0		0.0581033	0.456529	2.45961	0.828496	0.436477	0.51093	1.30941
4624	Regions/em	703.064	1247.34	0		0.0455847	0.471805	2.34583	0.81881	0.419865	0.393631	0.968401
4625	Regions/em	713.064	1247.34	0		0.0740886	0.369839	3.21375	0.890155	0.432438	0.455345	0.974352
4626	Regions/em	723.064	1247.34	0		0.0483024	0.381263	3.31658	1.00324	0.497858	0.432207	0.863847
4627	Regions/em	733.064	1247.34	0		0.0394812	0.357143	3.04602	0.814167	0.506393	0.537807	1.0964
4628	Regions/em	743.064	1247.34	0		0.0462773	0.29653	3.22514	0.719789	0.453967	0.746333	1.46768
4629	Regions/em	753.064	1247.34	0		0.0397653	0.347383	2.48147	0.837207	0.566602	0.449168	1.13552
4630	Regions/em	763.064	1247.34	0		0.0579224	0.356032	2.7859	0.51318	0.508904	0.568328	1.1073
4631	Regions/em	773.064	1247.34	0		0.0741105	0.371543	3.5683	0.636284	0.5073	0.494751	1.1284
4632	Regions/em	783.064	1247.34	0		0.0499078	0.419325	3.63329	0.728448	0.384149	0.718746	1.73233
4633	Regions/em	793.064	1247.34	0		0.036317	0.39822	2.39683	0.93186	0.500769	0.332193	0.878368
4634	Regions/em	803.064	1247.34	0		0.0362976	0.533637	2.29248	0.841588	0.355979	0.6794	1.31083
4635	Regions/em	813.064	1247.34	0		0.0415437	0.315648	3.08346	0.757	0.417218	0.707393	1.33591
4636	Regions/em	823.064	1247.34	0		0.041507	0.428957	2.57123	0.793489	0.470895	0.550257	1.24824
4637	Regions/em	833.064	1247.34	0		0.0501994	0.332827	2.83155	0.765471	0.542323	0.587574	1.27836
4638	Regions/em	843.064	1247.34	0		0.0425526	0.403051	3.01548	0.719608	0.550856	0.683206	1.27954
4639	Regions/em	853.064	1247.34	0		0.0333995	0.367611	2.764	0.864178	0.371457	0.723545	0.963272
4640	Regions/em	863.064	1247.34	0		0.0340694	0.392202	3.04891	0.902664	0.391171	0.854657	1.14919
4641	Regions/em	873.064	1247.34	0		0.0311564	0.53057	2.16663	0.904873	0.311524	0.858103	1.21821
4642	Regions/em	883.064	1247.34	0		0.0301375	0.385809	3.14477	1.05	0.320775	0.654722	0.896318
4643	Regions/em	893.064	1247.34	0		0.027618	0.431673	2.50845	0.969281	0.293375	0.710643	1.0379
4644	Regions/em	903.064	1247.34	0		0.0290797	0.34345	2.93953	0.907953	0.259634	0.817607	1.28424
4645	Regions/em	913.064	1247.34	0		0.032787	0.417788	2.67181	0.835044	0.278685	1.07883	1.41015
4646	Regions/em	923.064	1247.34	0		0.0343632	0.377204	3.0161	0.846	0.371027	0.716637	1.18067
4647	Regions/em	933.064	1247.34	0		0.0353957	0.403416	3.383	0.863197	0.301376	0.550345	1.11259
4648	Regions/em	943.064	1247.34	0		0.0378932	0.481737	3.01865	0.877901	0.37289	0.649992	1.31326
4649	Regions/em	953.064	1247.34	0		0.0381264	0.430005	2.95405	0.781752	0.350761	0.732634	1.67139
4650	Regions/em	963.064	1247.34	0		0.0308537	0.468304	3.15533	0.949559	0.274119	0.835214	1.4082
4651	Regions/em	973.064	1247.34	0		0.0314404	0.444763	3.05765	1.10119	0.334031	0.866457	1.41774
4652	Regions/em	983.064	1247.34	0		0.0438513	0.344046	2.73326	0.886167	0.324338	0.563976	1.30814
4653	Regions/em	993.064	1247.34	0		0.0355659	0.430536	3.17503	0.939718	0.320593	0.471063	1.02868
4654	Regions/em	1003.06	1247.34	0		0.0373846	0.530819	3.51747	0.852658	0.328262	0.534667	1.01545
4655	Regions/em	1013.06	1247.34	0		0.0373862	0.555317	3.43578	0.898035	0.334978	0.532606	1.49352
4656	Regions/em	1023.06	1247.34	0		0.0436259	0.565116	3.51601	1.01532	0.338983	0.485978	1.21709
4657	Regions/em	1033.06	1247.34	0		0.0423225	0.497916	4.15948	0.833026	0.412233	0.526691	1.31121
4658	Regions/em	1043.06	1247.34	0		0.0442489	0.485708	3.0646	0.81663	0.462063	0.445268	1.25992
4659	Regions/em	1053.06	1247.34	0		0.0378963	0.561113	3.47275	0.670102	0.450207	0.4071	1.37306
4660	Regions/em	1063.06	1247.34	0		0.0527788	0.551133	3.32216	0.874045	0.364857	0.45167	1.37307
4661	Regions/em	1073.06	1247.34	0		0.0598715	0.639845	2.67157	0.979047	0.279935	0.551887	1.04328
4662	Regions/em	1083.06	1247.34	0		0.0779256	0.562591	3.42796	1.04665	0.249041	0.487341	1.10343
4663	Regions/em	1093.06	1247.34	0		0.0525934	0.46883	3.13333	1.06602	0.263828	0.545122	1.0471
4664	Regions/em	1103.06	1247.34	0		0.0444803	0.435946	3.73308	0.921	0.273543	0.617461	1.31239
4665	Regions/em	1113.06	1247.34	0		0.0396546	0.431078	3.24078	0.872071	0.295412	0.610658	1.33278
4666	Regions/em	1123.06	1247.34	0		0.0373018	0.407705	3.86175	0.849332	0.268704	0.681873	1.19032
4667	Regions/em	1133.06	1247.34	0		0.0509447	0.415269	3.34901	0.920451	0.335014	0.6215	1.22488
4668	Regions/em	1143.06	1247.34	0		0.0542811	0.46712	2.8898	0.867479	0.329716	0.656436	1.33512
4669	Regions/em	1153.06	1247.34	0		0.0534618	0.451998	3.09989	1.02298	0.389859	0.537585	1.26102
4670	Regions/em	1163.06	1247.34	0		0.0625439	0.516254	3.09929	0.818113	0.456598	0.392202	1.04394
4671	Regions/em	1173.06	1247.34	0		0.0530843	0.417326	2.83938	0.900654	0.491078	0.513061	1.63534
4672	Regions/em	1183.06	1247.34	0		0.0481434	0.400153	2.88694	0.82141	0.455214	0.477429	1.15856
4673	Regions/em	1193.06	1247.34	0		0.049974	0.487261	2.6853	1.03572	0.377155	0.463662	1.25464
4674	Regions/em	1203.06	1247.34	0		0.0592784	0.414406	2.51146	1.01025	0.329626	0.503351	1.05084
4816	Regions/em	553.064	1237.34	0		0.0479622	0.354761	3.32444	1.26	0.194573	0.685881	1.27153
4817	Regions/em	563.064	1237.34	0		0.0505782	0.365291	2.89831	1.13765	0.229107	0.740315	1.57695
4818	Regions/em	573.064	1237.34	0		0.053359	0.387397	2.99617	1.14251	0.23511	0.762025	1.5426
4819	Regions/em	583.064	1237.34	0		0.0533379	0.339005	3.50492	0.877015	0.3072	0.557141	1.48025
4820	Regions/em	593.064	1237.34	0		0.0445393	0.320003	3.33812	0.924442	0.338812	0.520991	1.40948
4821	Regions/em	603.064	1237.34	0		0.0585175	0.343615	3.39666	0.807195	0.419855	0.391304	1.29413
4822	Regions/em	613.064	1237.34	0		0.0354994	0.50208	3.55378	0.881168	0.395074	0.422258	1.15275
4823	Regions/em	623.064	1237.34	0		0.0534706	0.340132	3.57695	0.614196	0.446225	0.387284	1.21375
4824	Regions/em	633.064	1237.34	0		0.0645846	0.362034	4.08999	0.724614	0.409308	0.420953	1.2266
4825	Regions/em	643.064	1237.34	0		0.056881	0.352889	2.60396	0.851153	0.399744	0.393107	0.922437
4826	Regions/em	653.064	1237.34	0		0.0608254	0.424264	2.93092	0.815296	0.378423	0.349464	0.875744
4827	Regions/em	663.064	1237.34	0		0.0513925	0.349911	3.91728	0.86575	0.352765	0.433362	1.11638
4828	Regions/em	673.064	1237.34	0		0.0582853	0.348024	3.15939	0.665593	0.375849	0.525392	1.02273
4829	Regions/em	683.064	1237.34	0		0.0715355	0.297923	3.15237	0.760325	0.396682	0.405077	1.02874
4830	Regions/em	693.064	1237.34	0		0.067676	0.400517	2.71696	0.837602	0.462289	0.438364	0.919558
4831	Regions/em	703.064	1237.34	0		0.0559411	0.306182	3.24249	0.855493	0.444881	0.439849	1.17264
4832	Regions/em	713.064	1237.34	0		0.0494297	0.437723	2.91724	1.09133	0.397633	0.596698	1.19693
4833	Regions/em	723.064	1237.34	0		0.0447893	0.376349	3.06773	0.921337	0.371571	0.730206	1.23591
4834	Regions/em	733.064	1237.34	0		0.0349966	0.359152	2.69328	0.860746	0.507673	0.466348	0.89097
4835	Regions/em	743.064	1237.34	0		0.0343787	0.380703	2.55934	0.824	0.417877	0.583181	0.9539
4836	Regions/em	753.064	1237.34	0		0.0248005	0.255109	2.5694	0.609	0.572179	0.592501	1.41157
4837	Regions/em	763.064	1237.34	0		0.0423587	0.432033	2.91288	0.76	0.624747	0.442883	1.1655
4838	Regions/em	773.064	1237.34	0		0.0458934	0.353347	3.00827	0.672127	0.630894	0.515595	1.25175
4839	Regions/em	783.064	1237.34	0		0.0321607	0.452845	2.20136	1.06385	0.386173	0.673294	1.25848
4840	Regions/em	793.064	1237.34	0		0.0277683	0.0509732	2.23936	0.72021	0.416306	0.819549	1.33582
4841	Regions/em	803.064	1237.34	0		0.0459736	0.318002	3.00398	1.06871	0.351807	0.690771	1.04531
4842	Regions/em	813.064	1237.34	0		0.0388145	0.588477	2.18368	1.0109	0.448108	0.747199	1.24004
4843	Regions/em	823.064	1237.34	0		0.0450193	0.431057	2.64841	0.847002	0.426389	0.74717	1.11873
4844	Regions/em	833.064	1237.34	0		0.0517016	0.393204	3.40874	0.786645	0.495884	0.677556	1.07979
4845	Regions/em	843.064	1237.34	0		0.060767	0.381328	3.13024	0.772909	0.499336	0.674169	1.28259
4846	Regions/em	853.064	1237.34	0		0.0452665	0.502642	2.40032	1.1	0.503564	0.877591	1.60797
4847	Regions/em	863.064	1237.34	0		0.0422919	0.438901	2.26821	0.908211	0.338444	0.972054	1.29849
4848	Regions/em	873.064	1237.34	0		0.0324957	0.383129	2.59205	0.872623	0.473441	0.847888	1.18053
4849	Regions/em	883.064	1237.34	0		0.0440027	0.325985	3.33051	0.974421	0.224972	0.870354	1.06061
4850	Regions/em	893.064	1237.34	0		0.0297468	0.414875	3.78353	0.966	0.30137	0.699304	0.858872
4851	Regions/em	903.064	1237.34	0		0.0249421	0.348019	3.06567	1.0429	0.249837	0.844575	1.15204
4852	Regions/em	913.064	1237.34	0		0.0250749	0.365673	3.30982	0.896	0.338071	0.761688	1.15804
4853	Regions/em	923.064	1237.34	0		0.0565799	0.335858	3.057	1.047	0.404557	1.01364	1.11939
4854	Regions/em	933.064	1237.34	0		0.0413246	0.310988	2.71916	0.805267	0.356555	0.714957	0.997293
4855	Regions/em	943.064	1237.34	0		0.0456503	0.307857	3.08067	0.878702	0.384674	0.969507	1.05371
4856	Regions/em	953.064	1237.34	0		0.042704	0.390049	2.51446	0.864253	0.383489	1.0244	1.30025
4857	Regions/em	963.064	1237.34	0		0.0430822	0.285957	2.64102	0.804605	0.368011	0.854142	1.24061
4858	Regions/em	973.064	1237.34	0		0.0283274	0.40548	3.02098	0.781	0.436982	0.893403	1.98609
4859	Regions/em	983.064	1237.34	0		0.0253238	0.336778	3.34368	0.92	0.468913	0.746616	1.14042
4860	Regions/em	993.064	1237.34	0		0.0369565	0.340812	3.46135	0.842	0.29602	0.783679	1.04954
4861	Regions/em	1003.06	1237.34	0		0.0381374	0.337836	3.03143	0.697	0.427234	0.648906	1.26584
4862	Regions/em	1013.06	1237.34	0		0.0401914	0.418072	3.20029	0.882822	0.499928	0.497919	1.22596
4863	Regions/em	1023.06	1237.34	0		0.0372921	0.656705	3.19116	0.899625	0.413952	0.450389	0.770375
4864	Regions/em	1033.06	1237.34	0		0.0508585	0.648539	2.54441	0.938951	0.524081	0.358373	1.07458
4865	Regions/em	1043.06	1237.34	0		0.0504699	0.550334	3.39778	0.733016	0.54915	0.361374	1.01283
4866	Regions/em	1053.06	1237.34	0		0.0403205	0.64973	3.1842	0.679084	0.522709	0.450535	1.45634
4867	Regions/em	1063.06	1237.34	0		0.0483625	0.593382	3.15334	0.8146	0.48719	0.402923	1.33834
4868	Regions/em	1073.06	1237.34	0		0.0541816	0.744303	3.17624	0.927169	0.347742	0.525217	1.21794
4869	Regions/em	1083.06	1237.34	0		0.0586409	0.539393	3.33844	0.854259	0.351702	0.556886	1.17696
4870	Regions/em	1093.06	1237.34	0		0.0397461	0.503886	2.40258	0.854542	0.322688	0.553249	0.838207
4871	Regions/em	1103.06	1237.34	0		0.0304003	0.438151	3.04312	0.862838	0.266371	0.953821	1.43737
4872	Regions/em	1113.06	1237.34	0		0.0408443	0.514289	3.48292	0.904604	0.384711	0.739826	1.426
4873	Regions/em	1123.06	1237.34	0		0.0458493	0.460043	3.06057	0.78158	0.413938	0.579352	1.35455
4874	Regions/em	1133.06	1237.34	0		0.0558652	0.566743	3.11638	0.765145	0.412386	0.494223	1.2191
4875	Regions/em	1143.06	1237.34	0		0.0556517	0.615921	3.36199	0.867226	0.432729	0.541173	1.38078
4876	Regions/em	1153.06	1237.34	0		0.0586079	0.52576	3.27835	0.763767	0.44542	0.505569	1.2173
4877	Regions/em	1163.06	1237.34	0		0.0535776	0.50385	3.20111	0.80961	0.501775	0.413946	1.12502
4878	Regions/em	1173.06	1237.34	0		0.0509082	0.433436	3.04796	0.813788	0.498317	0.416488	1.12477
4879	Regions/em	1183.06	1237.34	0		0.0401436	0.43843	2.83021	0.967327	0.573085	0.438473	1.67649
4880	Regions/em	1193.06	1237.34	0		0.0431271	0.492355	3.08755	1.01227	0.453914	0.481311	1.41116
4881	Regions/em	1203.06	1237.34	0		0.0449877	0.50282	3.01264	1.06132	0.387968	0.452662	1.31107
4882	Regions/em	1213.06	1237.34	0		0.0453469	0.414399	3.26691	0.918013	0.353459	0.543353	1.39118
4883	Regions/em	1223.06	1237.34	0		0.047807	0.399301	3.46331	0.950299	0.378877	0.443462	1.01036
4884	Regions/em	1233.06	1237.34	0		0.0399693	0.409268	2.61996	0.876247	0.333778	0.539303	1.06532
4885	Regions/em	1243.06	1237.34	0		0.047159	0.422353	2.69002	1.03	0.330877	0.479913	1.17706
4886	Regions/em	1253.06	1237.34	0		0.0407032	0.404902	3.43908	1.07661	0.314195	0.465787	1.06206
5021	Regions/em	533.064	1227.34	0		0.0611706	0.267736	3.19731	1.02817	0.143052	1.08109	1.48684
5022	Regions/em	543.064	1227.34	0		0.0433632	0.410551	3.70632	1.21118	0.141656	1.13222	1.6504
5023	Regions/em	553.064	1227.34	0		0.0569099	0.360378	3.65223	1.13	0.194753	0.79363	1.58898
5024	Regions/em	563.064	1227.34	0		0.0541533	0.433446	3.39161	1.06106	0.222823	0.615125	1.09131
5025	Regions/em	573.064	1227.34	0		0.0483449	0.421163	4.87721	1.11	0.290337	0.829817	1.45245
5026	Regions/em	583.064	1227.34	0		0.0486832	0.324279	2.80879	0.968741	0.27352	0.647352	1.30015
5027	Regions/em	593.064	1227.34	0		0.0563541	0.275206	3.72225	0.817239	0.398669	0.415341	1.17034
5028	Regions/em	603.064	1227.34	0		0.0532531	0.442071	3.47837	0.742532	0.460583	0.441794	1.15206
5029	Regions/em	613.064	1227.34	0		0.0411015	0.398263	2.33581	0.81439	0.475964	0.391693	1.53276
5030	Regions/em	623.064	1227.34	0		0.0716236	0.363386	3.70694	0.703476	0.414831	0.459775	1.15591
5031	Regions/em	633.064	1227.34	0		0.0533511	0.363514	3.44855	0.766825	0.481945	0.30189	0.851036
5032	Regions/em	643.064	1227.34	0		0.0472092	0.373491	3.04354	0.799353	0.337871	0.625149	1.65907
5033	Regions/em	653.064	1227.34	0		0.0369196	0.428503	3.34247	0.949942	0.342636	0.723196	1.45385
5034	Regions/em	663.064	1227.34	0		0.0389745	0.398431	3.60575	0.664435	0.4153	0.486312	0.957947
5035	Regions/em	673.064	1227.34	0		0.0465502	0.389341	2.61982	0.810171	0.399683	0.585754	1.057
5036	Regions/em	683.064	1227.34	0		0.0796061	0.32318	2.73017	0.717198	0.400621	0.497168	1.04371
5037	Regions/em	693.064	1227.34	0		0.0400304	0.367962	3.86338	0.845446	0.38354	0.489247	0.921429
5038	Regions/em	703.064	1227.34	0		0.0409784	0.493614	3.13377	0.976643	0.445771	0.393016	0.70933
5039	Regions/em	713.064	1227.34	0		0.0327599	0.308916	2.46168	1.09	0.335634	0.829622	1.2495
5040	Regions/em	723.064	1227.34	0		0.0255934	0.359187	1.85896	0.887353	0.291399	0.828149	0.942013
5041	Regions/em	733.064	1227.34	0		0.0261453	0.309945	2.96529	0.982	0.276023	0.699321	1.16338
5042	Regions/em	743.064	1227.34	0		0.0321689	0.41787	2.93749	0.839716	0.395515	0.701564	1.01105
5043	Regions/em	753.064	1227.34	0		0.0279714	0.417015	3.0049	0.964	0.401128	0.790913	1.30407
5044	Regions/em	763.064	1227.34	0		0.0361861	0.450226	2.75271	0.959	0.342629	0.65652	0.888487
5045	Regions/em	773.064	1227.34	0		0.0352152	0.362302	3.03854	0.736187	0.582636	0.356923	0.754392
5046	Regions/em	783.064	1227.34	0		0.0308628	0.46958	3.24671	0.892	0.346754	0.546662	0.9618
5047	Regions/em	793.064	1227.34	0		0.0239682	0.335031	2.51474	1.22407	0.285133	0.00590417	0.008203
5048	Regions/em	803.064	1227.34	0		0.0294061	0.342792	2.58704	0.849373	0.290202	0.846875	0.927092
5049	Regions/em	813.064	1227.34	0		0.0300857	0.282196	2.22855	1.13718	0.374094	0.934885	1.18053
5050	Regions/em	823.064	1227.34	0		0.0519548	0.433123	2.8646	0.956623	0.557376	0.773338	1.22313
5051	Regions/em	833.064	1227.34	0		0.0461638	0.391123	2.41368	0.840117	0.497769	0.827711	1.25467
5052	Regions/em	843.064	1227.34	0		0.0460701	0.45418	2.32783	0.973066	0.503809	0.763561	1.37119
5053	Regions/em	853.064	1227.34	0		0.0536814	0.373802	2.66126	0.886664	0.426081	0.838023	1.14848
5054	Regions/em	863.064	1227.34	0		0.0361626	0.366616	2.72324	0.875666	0.42369	0.869805	1.41826
5055	Regions/em	873.064	1227.34	0		0.0466044	0.329614	2.61448	0.916528	0.419602	0.979309	1.00608
5056	Regions/em	883.064	1227.34	0		0.0279403	0.245263	2.58837	0.989725	0.323568	0.610521	0.77068
5057	Regions/em	893.064	1227.34	0		0.0305691	0.377108	2.75636	0.918	0.325549	0.722061	1.15971
5058	Regions/em	903.064	1227.34	0		0.0385581	0.363449	2.80159	0.902711	0.298858	0.903122	0.89969
5059	Regions/em	913.064	1227.34	0		0.0434303	0.318458	2.99642	0.911	0.384452	0.845567	1.00012
5060	Regions/em	923.064	1227.34	0		0.0417858	0.288792	2.91633	0.946166	0.413143	1.08808	1.37542
5061	Regions/em	933.064	1227.34	0		0.0346609	0.394248	1.82608	0.826	0.337207	1.00949	1.34553
5062	Regions/em	943.064	1227.34	0		0.0343857	0.276066	2.65752	0.919569	0.369573	1.18105	1.28875
5063	Regions/em	953.064	1227.34	0		0.0374449	0.548214	2.53128	1.02	0.457488	0.812959	1.49854
5064	Regions/em	963.064	1227.34	0		0.0495854	0.351104	2.48314	0.725	0.636231	1.18798	1.48228
5065	Regions/em	973.064	1227.34	0		0.035604	0.378438	3.33226	0.789382	0.527198	0.80257	1.3982
5066	Regions/em	983.064	1227.34	0		0.0384465	0.341566	2.86932	0.632402	0.62945	0.685471	1.24269
5067	Regions/em	993.064	1227.34	0		0.0327579	0.359991	2.42139	0.79971	0.599475	0.630964	1.25086
5068	Regions/em	1003.06	1227.34	0		0.0349846	0.389819	2.85455	0.747031	0.63834	0.571444	1.24659
5069	Regions/em	1013.06	1227.34	0		0.0480667	0.373834	3.38858	0.608058	0.753456	0.543604	1.57604
5070	Regions/em	1023.06	1227.34	0		0.0380148	0.639849	2.15308	0.725	0.550933	0.437952	1.02984
5071	Regions/em	1033.06	1227.34	0		0.0401605	0.587531	2.73575	0.805405	0.64912	0.347229	1.13647
5072	Regions/em	1043.06	1227.34	0		0.0450402	0.567729	3.0506	0.775361	0.582294	0.409244	1.21283
5073	Regions/em	1053.06	1227.34	0		0.039109	0.618493	3.36389	0.675385	0.586463	0.337863	1.04697
5074	Regions/em	1063.06	1227.34	0		0.0457226	0.496138	3.84715	0.726238	0.550548	0.422973	1.48725
5075	Regions/em	1073.06	1227.34	0		0.0452312	0.57935	2.8976	0.730862	0.496004	0.487255	1.7096
5076	Regions/em	1083.06	1227.34	0		0.0461279	0.602049	2.86778	0.727048	0.43986	0.476107	1.03276
5077	Regions/em	1093.06	1227.34	0		0.0372365	0.581845	2.29915	0.826589	0.333155	0.502406	0.770341
5078	Regions/em	1103.06	1227.34	0		0.0408197	0.427219	2.86986	0.86397	0.399069	0.562993	1.12596
5079	Regions/em	1113.06	1227.34	0		0.0387903	0.433607	3.94783	0.811211	0.490424	0.565742	1.48307
5080	Regions/em	1123.06	1227.34	0		0.0421656	0.539499	2.92737	0.835161	0.464671	0.516272	1.40769
5081	Regions/em	1133.06	1227.34	0		0.0426615	0.526473	4.57649	0.774173	0.358014	0.62359	1.28244
5082	Regions/em	1143.06	1227.34	0		0.0430524	0.507499	3.14922	0.682237	0.386114	0.584563	1.46842
5083	Regions/em	1153.06	1227.34	0		0.0522763	0.596819	3.47992	0.818798	0.471779	0.396578	1.22998
5084	Regions/em	1163.06	1227.34	0		0.0579292	0.474617	3.31811	0.797957	0.437771	0.415049	1.04679
5085	Regions/em	1173.06	1227.34	0		0.0598984	0.530261	2.90773	0.812234	0.49542	0.368862	1.09489
5086	Regions/em	1183.06	1227.34	0		0.0623287	0.61162	2.88768	0.796673	0.500524	0.357669	1.10779
5087	Regions/em	1193.06	1227.34	0		0.0595556	0.471003	3.30137	0.860694	0.425402	0.371309	0.912307
5088	Regions/em	1203.06	1227.34	0		0.0531566	0.576822	3.11024	0.968097	0.443279	0.345671	1.08068
5089	Regions/em	1213.06	1227.34	0		0.0585693	0.482174	2.74702	0.819658	0.394328	0.494433	1.1113
5090	Regions/em	1223.06	1227.34	0		0.0460819	0.461074	3.06308	0.979452	0.311951	0.479348	1.16743
5091	Regions/em	1233.06	1227.34	0		0.0526433	0.462894	2.85282	1.01201	0.360323	0.485383	0.980027
5092	Regions/em	1243.06	1227.34	0		0.0539823	0.414638	3.19132	0.902135	0.341061	0.580763	1.26332
5093	Regions/em	1253.06	1227.34	0		0.0603273	0.403258	2.94494	1.02841	0.286839	0.630299	1.08446
5094	Regions/em	1263.06	1227.34	0		0.0431273	0.424408	3.31509	1.21456	0.222203	0.726115	1.22257
5095	Regions/em	1273.06	1227.34	0		0.0469781	0.441791	2.64727	1.09504	0.221563	0.710258	1.25129
5096	Regions/em	1283.06	1227.34	0		0.0618662	0.377709	3.16217	1.07124	0.209865	0.607148	1.11293
5097	Regions/em	1293.06	1227.34	0		0.0735182	0.350344	2.93948	1.12085	0.203361	0.85085	1.40329
5098	Regions/em	1303.06	1227.34	0		0.0666362	0.336361	3.46901	1.12571	0.177661	0.745792	1.31028
5099	Regions/em	1313.06	1227.34	0		0.0683545	0.310962	3.45494	1.11765	0.158099	0.915402	1.57838
5227	Regions/em	523.064	1217.34	0		0.0630394	0.312997	3.33977	0.985096	0.141839	1.13353	1.6836
5228	Regions/em	533.064	1217.34	0		0.0687236	0.277127	3.40529	1.05059	0.125404	1.06407	1.4699
5229	Regions/em	543.064	1217.34	0		0.0833567	0.350835	3.01094	1.02717	0.158868	0.993122	1.642
5230	Regions/em	553.064	1217.34	0		0.0709103	0.392658	2.96161	0.940859	0.213447	0.709873	1.43818
5231	Regions/em	563.064	1217.34	0		0.0871696	0.31653	4.16519	0.816782	0.228026	0.703065	1.13936
5232	Regions/em	573.064	1217.34	0		0.0924171	0.340522	4.21003	0.83972	0.262672	0.634769	1.41513
5233	Regions/em	583.064	1217.34	0		0.0508533	0.335941	3.04096	0.937702	0.294282	0.565413	1.0624
5234	Regions/em	593.064	1217.34	0		0.0594555	0.341252	2.67945	0.878	0.402458	0.604547	1.44905
5235	Regions/em	603.064	1217.34	0		0.0368836	0.271353	2.54517	0.738	0.401212	0.55351	1.40122
5236	Regions/em	613.064	1217.34	0		0.0472998	0.38582	2.66798	0.688168	0.530395	0.363879	1.00524
5237	Regions/em	623.064	1217.34	0		0.0531091	0.300121	3.06886	0.671903	0.521483	0.480273	1.58171
5238	Regions/em	633.064	1217.34	0		0.0441286	0.34923	3.13563	0.673	0.535546	0.401847	1.06265
5239	Regions/em	643.064	1217.34	0		0.0420241	0.400603	3.31552	0.697184	0.475466	0.38478	1.29944
5240	Regions/em	653.064	1217.34	0		0.0430665	0.328279	4.19051	0.819794	0.420768	0.588021	1.10474
5241	Regions/em	663.064	1217.34	0		0.0425419	0.386898	3.16081	0.790051	0.455447	0.636533	1.61426
5242	Regions/em	673.064	1217.34	0		0.0641227	0.361021	3.03059	0.707749	0.470366	0.409615	0.712146
5243	Regions/em	683.064	1217.34	0		0.0438675	0.377019	2.77569	0.952	0.518064	0.64987	1.01134
5244	Regions/em	693.064	1217.34	0		0.04466	0.395415	2.89933	0.85918	0.47353	0.699607	0.988998
5245	Regions/em	703.064	1217.34	0		0.0391423	0.374126	2.37536	0.875	0.320806	0.859212	0.822678
5246	Regions/em	713.064	1217.34	0		0.0312344	0.4254	2.94104	0.873	0.297688	0.959084	1.13486
5247	Regions/em	723.064	1217.34	0		0.0310525	0.310666	2.72404	0.990615	0.360439	0.964876	0.991434
5248	Regions/em	733.064	1217.34	0		0.0351219	0.350144	3.22852	0.931	0.386301	0.641997	1.33654
5249	Regions/em	743.064	1217.34	0		0.0313412	0.359096	2.37593	0.877141	0.275406	0.97283	1.27914
5250	Regions/em	753.064	1217.34	0		0.0302259	0.389093	2.14169	0.79923	0.400317	0.910778	1.05469
5251	Regions/em	763.064	1217.34	0		0.0312596	0.35293	3.02286	0.878546	0.271497	0.697781	0.920543
5252	Regions/em	773.064	1217.34	0		0.0323054	0.34186	2.48551	1.01	0.373459	0.0020484	0.0043911
5253	Regions/em	783.064	1217.34	0		0.0279442	0.368856	3.30167	0.985685	0.325877	0.840082	1.11665
5254	Regions/em	793.064	1217.34	0		0.0341054	0.431369	2.11128	1.11657	0.340952	0.0066645	0.780591
5255	Regions/em	803.064	1217.34	0		0.0295041	0.349531	2.76549	0.995	0.264745	0.619783	0.860247
5256	Regions/em	813.064	1217.34	0		0.0336728	0.393599	2.47452	1.0366	0.418978	0.753068	0.896612
5257	Regions/em	823.064	1217.34	0		0.0613924	0.331775	2.36692	0.793835	0.442663	0.81287	1.00441
5258	Regions/em	833.064	1217.34	0		0.0545286	0.396018	2.59616	0.767103	0.385382	0.898758	0.942639
5259	Regions/em	843.064	1217.34	0		0.0506425	0.371341	2.44226	0.77	0.483138	0.79884	1.03988
5260	Regions/em	853.064	1217.34	0		0.0602752	0.29633	2.37242	0.938249	0.467931	0.808703	0.858865
5261	Regions/em	863.064	1217.34	0		0.0366208	0.37185	2.43829	0.883029	0.43636	0.779909	1.23572
5262	Regions/em	873.064	1217.34	0		0.0394895	0.351905	2.34732	1.01507	0.459968	0.959577	1.41127
5263	Regions/em	883.064	1217.34	0		0.0447001	0.36751	2.54151	0.897905	0.427856	0.988876	1.1035
5264	Regions/em	893.064	1217.34	0		0.0352997	0.408955	2.34939	0.868985	0.352654	0.825807	1.00292
5265	Regions/em	903.064	1217.34	0		0.0487601	0.319871	3.49783	1.07769	0.411141	0.795203	0.768966
5266	Regions/em	913.064	1217.34	0		0.0433693	0.30376	2.73337	0.774734	0.432219	0.860772	1.19418
5267	Regions/em	923.064	1217.34	0		0.0441763	0.3774	2.73115	0.997868	0.446635	0.925081	1.3509
5268	Regions/em	933.064	1217.34	0		0.0382722	0.278205	2.83999	1.00791	0.431902	1.13966	1.60297
5269	Regions/em	943.064	1217.34	0		0.0480072	0.313046	2.70349	0.924487	0.426749	1.01371	1.22132
5270	Regions/em	953.064	1217.34	0		0.0410965	0.338366	2.87903	0.820606	0.400434	1.05026	1.2839
5271	Regions/em	963.064	1217.34	0		0.0496849	0.383633	2.63773	0.824861	0.495485	0.825305	1.38791
5272	Regions/em	973.064	1217.34	0		0.0517299	0.352455	2.58192	0.737753	0.558558	0.830933	1.19565
5273	Regions/em	983.064	1217.34	0		0.0519558	0.350162	2.56761	0.629537	0.674945	0.775409	1.84268
5274	Regions/em	993.064	1217.34	0		0.0408478	0.340942	3.03988	0.698277	0.640563	0.857698	1.62836
5275	Regions/em	1003.06	1217.34	0		0.0463497	0.427615	3.49679	0.892987	0.738928	0.712074	1.58985
5276	Regions/em	1013.06	1217.34	0		0.0382575	0.451966	2.50032	0.769101	0.674298	0.649632	1.66954
5277	Regions/em	1023.06	1217.34	0		0.0369643	0.652755	2.47721	0.721	0.667391	0.452004	1.49072
5278	Regions/em	1033.06	1217.34	0		0.0330606	0.604208	2.77087	0.719	0.679903	0.33678	1.3304
5279	Regions/em	1043.06	1217.34	0		0.0483001	0.631241	3.05801	0.665208	0.642688	0.309918	1.00046
5280	Regions/em	1053.06	1217.34	0		0.0354525	0.573294	3.44023	0.722	0.712077	0.363625	1.61117
5281	Regions/em	1063.06	1217.34	0		0.0433182	0.549144	3.0702	0.691661	0.566273	0.526597	1.48308
5282	Regions/em	1073.06	1217.34	0		0.0482643	0.464591	2.98306	0.625326	0.622554	0.473979	1.39402
5283	Regions/em	1083.06	1217.34	0		0.0395371	0.500391	2.46766	0.720411	0.537873	0.500789	1.21749
5284	Regions/em	1093.06	1217.34	0		0.0384432	0.482117	2.56401	0.704	0.594046	0.529658	1.24794
5285	Regions/em	1103.06	1217.34	0		0.0376659	0.52113	3.45363	0.759481	0.477289	0.664044	1.33998
5286	Regions/em	1113.06	1217.34	0		0.0450556	0.417945	3.04901	0.657262	0.541778	0.499194	1.34743
5287	Regions/em	1123.06	1217.34	0		0.0379289	0.631137	2.73601	0.743467	0.482989	0.469593	1.2138
5288	Regions/em	1133.06	1217.34	0		0.0367737	0.571736	3.43381	0.770921	0.421765	0.537266	1.39896
5289	Regions/em	1143.06	1217.34	0		0.0429929	0.659138	3.13201	0.789923	0.394537	0.510917	1.47786
5290	Regions/em	1153.06	1217.34	0		0.0338546	0.644633	3.52048	0.770274	0.424805	0.438659	1.33155
5291	Regions/em	1163.06	1217.34	0		0.0494699	0.533989	4.01608	0.612096	0.473149	0.498797	1.53101
5292	Regions/em	1173.06	1217.34	0		0.0699745	0.51425	3.48032	0.678521	0.439555	0.404697	0.947184
5293	Regions/em	1183.06	1217.34	0		0.0587165	0.506589	3.32976	0.819107	0.449923	0.381544	0.936597
5294	Regions/em	1193.06	1217.34	0		0.0605498	0.555287	3.09973	0.819486	0.449488	0.415079	1.19928
5295	Regions/em	1203.06	1217.34	0		0.0568666	0.515867	3.93352	0.75598	0.465425	0.382935	1.20355
5296	Regions/em	1213.06	1217.34	0		0.0517711	0.527502	3.28746	0.934789	0.39837	0.405161	1.14168
5297	Regions/em	1223.06	1217.34	0		0.057364	0.54266	3.57235	0.974889	0.388278	0.453522	1.24109
5298	Regions/em	1233.06	1217.34	0		0.052425	0.362455	2.85523	0.857986	0.322866	0.51373	0.905845
5299	Regions/em	1243.06	1217.34	0		0.0491384	0.37963	4.33901	0.944695	0.327162	0.455511	0.943144
5300	Regions/em	1253.06	1217.34	0		0.0493114	0.428756	3.11624	1.0472	0.272039	0.687907	0.981383
5301	Regions/em	1263.06	1217.34	0		0.0421994	0.479179	3.5609	1.00761	0.263067	0.598908	0.978808
5302	Regions/em	1273.06	1217.34	0		0.0746375	0.397627	3.25823	0.976349	0.265212	0.572264	0.987625
5303	Regions/em	1283.06	1217.34	0		0.0714258	0.370164	3.02628	1.07066	0.206619	0.591143	0.873148
5304	Regions/em	1293.06	1217.34	0		0.0675363	0.388661	2.80281	1.2349	0.208327	0.638623	0.998266
5305	Regions/em	1303.06	1217.34	0		0.0561623	0.332958	3.40579	1.10796	0.224096	0.605321	1.11176
5306	Regions/em	1313.06	1217.34	0		0.0533415	0.307705	3.305	0.989968	0.187125	0.801396	1.33515
5307	Regions/em	1323.06	1217.34	0		0.0543995	0.335725	3.46904	0.939327	0.172952	0.867225	1.24141
5308	Regions/em	1333.06	1217.34	0		0.0596599	0.378381	2.698	1.19226	0.165441	0.998857	1.58466
5432	Regions/em	503.064	1207.34	0		0.056741	0.288645	2.67949	1.33576	0.154305	0.876754	1.14345
5433	Regions/em	513.064	1207.34	0		0.0569212	0.260977	4.85217	1.07952	0.156615	0.987278	1.37419
5434	Regions/em	523.064	1207.34	0		0.0837491	0.293591	3.61238	1.01246	0.176065	0.968422	1.5454
5435	Regions/em	533.064	1207.34	0		0.0814532	0.341333	3.21633	1.04679	0.157633	1.08763	1.58321
5436	Regions/em	543.064	1207.34	0		0.0832256	0.398943	3.58542	1.05893	0.185436	0.886526	1.33666
5437	Regions/em	553.064	1207.34	0		0.0816263	0.332101	3.47739	0.931664	0.215386	0.832131	1.27138
5438	Regions/em	563.064	1207.34	0		0.0708265	0.341321	3.46169	1.09782	0.246241	0.604058	1.09337
5439	Regions/em	573.064	1207.34	0		0.0532264	0.38745	3.45187	0.962031	0.289741	0.682821	1.43934
5440	Regions/em	583.064	1207.34	0		0.03411	0.394615	3.22277	1.02169	0.309092	0.627785	1.23887
5441	Regions/em	593.064	1207.34	0		0.035476	0.328367	3.07854	0.859982	0.366442	0.563857	1.12709
5442	Regions/em	603.064	1207.34	0		0.0589363	0.380114	3.06655	0.695504	0.497628	0.554646	1.3961
5443	Regions/em	613.064	1207.34	0		0.0411904	0.361308	3.10017	0.78797	0.480695	0.550539	1.32578
5444	Regions/em	623.064	1207.34	0		0.0644676	0.373262	2.92012	0.701107	0.434815	0.659561	1.62551
5445	Regions/em	633.064	1207.34	0		0.0824648	0.290152	2.95357	0.587904	0.609127	0.445972	1.17511
5446	Regions/em	643.064	1207.34	0		0.0887668	0.346434	2.88813	0.682317	0.509591	0.533862	0.934474
5447	Regions/em	653.064	1207.34	0		0.0440744	0.375659	2.5468	0.721393	0.47355	0.703349	1.47073
5448	Regions/em	663.064	1207.34	0		0.0543842	0.25181	2.83126	0.810854	0.513762	0.681044	0.983509
5449	Regions/em	673.064	1207.34	0		0.0410365	0.365156	2.77252	0.955349	0.361884	0.78787	0.955846
5450	Regions/em	683.064	1207.34	0		0.0342153	0.390144	2.76462	0.9941	0.473864	0.681638	1.04586
5451	Regions/em	693.064	1207.34	0		0.037816	0.355555	2.63037	0.87039	0.412616	0.97715	1.32099
5452	Regions/em	703.064	1207.34	0		0.0511924	0.33658	2.43425	0.767728	0.4611	0.838578	1.09224
5453	Regions/em	713.064	1207.34	0		0.0408025	0.356443	2.7155	0.865148	0.462545	1.02201	1.77966
5454	Regions/em	723.064	1207.34	0		0.037791	0.333017	3.50078	0.924143	0.399365	0.916513	1.75398
5455	Regions/em	733.064	1207.34	0		0.0465069	0.321142	2.83289	0.850038	0.346141	1.02988	0.983899
5456	Regions/em	743.064	1207.34	0		0.0277887	0.233392	2.98631	0.884	0.259194	1.16656	1.78505
5457	Regions/em	753.064	1207.34	0		0.0320284	0.379499	2.3317	0.967	0.415432	0.657604	0.832678
5458	Regions/em	763.064	1207.34	0		0.034275	0.313232	2.63604	1.03099	0.266452	0.924958	0.898582
5459	Regions/em	773.064	1207.34	0		0.0308157	0.381661	3.25441	0.882648	0.321774	0.660326	0.892802
5460	Regions/em	783.064	1207.34	0		0.0227476	0.314213	2.91623	1.04069	0.28529	0.747663	0.992555
5461	Regions/em	793.064	1207.34	0		0.0267422	0.570695	1.70633	0.405891	0.359486	0.808399	0.794455
5462	Regions/em	803.064	1207.34	0		0.0244458	0.525987	2.18989	0.729	0.376217	0.654816	0.85484
5463	Regions/em	813.064	1207.34	0		0.0306615	0.466017	2.31409	1.01	0.373385	0.886639	1.46096
5464	Regions/em	823.064	1207.34	0		0.030353	0.368719	2.7109	0.971855	0.474852	0.639435	1.06297
5465	Regions/em	833.064	1207.34	0		0.0439428	0.390878	2.84251	0.83144	0.412657	0.60445	0.731139
5466	Regions/em	843.064	1207.34	0		0.0445203	0.425989	2.63078	0.835548	0.397813	0.677379	0.952795
5467	Regions/em	853.064	1207.34	0		0.0455748	0.425704	2.32528	0.854093	0.532315	0.755153	1.52863
5468	Regions/em	863.064	1207.34	0		0.0412174	0.458071	2.22114	1.1	0.417716	1.01628	1.10281
5469	Regions/em	873.064	1207.34	0		0.0323548	0.433212	2.99593	0.832329	0.375582	1.09844	1.43067
5470	Regions/em	883.064	1207.34	0		0.0391054	0.332561	2.74071	0.985224	0.432805	1.11007	1.36657
5471	Regions/em	893.064	1207.34	0		0.0479866	0.352072	2.91684	0.972513	0.428131	0.968166	1.03453
5472	Regions/em	903.064	1207.34	0		0.0403489	0.331906	2.92391	0.962362	0.432396	1.02243	1.03551
5473	Regions/em	913.064	1207.34	0		0.035903	0.308496	2.62288	0.897636	0.418378	1.06691	1.25925
5474	Regions/em	923.064	1207.34	0		0.0433026	0.298152	2.77235	1.00592	0.309327	1.28634	1.27373
5475	Regions/em	933.064	1207.34	0		0.0524627	0.332678	2.73129	0.878	0.356596	1.04589	1.18105
5476	Regions/em	943.064	1207.34	0		0.0372069	0.445163	2.10063	0.862	0.506267	0.892631	1.16931
5477	Regions/em	953.064	1207.34	0		0.0345779	0.36129	2.53498	0.817616	0.517572	1.03261	1.71524
5478	Regions/em	963.064	1207.34	0		0.0416572	0.409132	2.10249	0.688639	0.555839	0.859719	1.34129
5479	Regions/em	973.064	1207.34	0		0.0528965	0.355281	2.03558	0.721881	0.443159	0.852564	1.42195
5480	Regions/em	983.064	1207.34	0		0.0417023	0.348788	2.54706	0.91055	0.550884	0.818605	1.33257
5481	Regions/em	993.064	1207.34	0		0.0474205	0.345871	2.42239	0.916649	0.478968	0.602738	0.919872
5482	Regions/em	1003.06	1207.34	0		0.0402742	0.420909	2.39125	0.783679	0.535432	0.625676	1.23563
5483	Regions/em	1013.06	1207.34	0		0.0440918	0.438456	2.44693	0.821672	0.643038	0.597379	1.54337
5484	Regions/em	1023.06	1207.34	0		0.0363881	0.610907	2.76129	0.773114	0.768602	0.474532	1.81247
5485	Regions/em	1033.06	1207.34	0		0.0347527	0.528987	2.61103	0.666315	0.630232	0.482494	1.48131
5486	Regions/em	1043.06	1207.34	0		0.0561673	0.53151	2.89899	0.689265	0.74816	0.293406	0.881944
5487	Regions/em	1053.06	1207.34	0		0.0533149	0.64148	3.07482	0.743914	0.686775	0.368619	1.14304
5488	Regions/em	1063.06	1207.34	0		0.0460354	0.456674	3.14417	0.63121	0.632648	0.486947	1.299
5489	Regions/em	1073.06	1207.34	0		0.0452768	0.50689	2.64875	0.695537	0.692821	0.420873	1.4585
5490	Regions/em	1083.06	1207.34	0		0.0455461	0.503371	2.88264	0.536577	0.787959	0.4852	1.42664
5491	Regions/em	1093.06	1207.34	0		0.0423313	0.45686	2.75476	0.617875	0.622527	0.553058	0.961726
5492	Regions/em	1103.06	1207.34	0		0.0336154	0.565361	3.25932	0.748902	0.601319	0.495923	1.35477
5493	Regions/em	1113.06	1207.34	0		0.0427575	0.525468	3.02791	0.68223	0.65041	0.574438	1.79496
5494	Regions/em	1123.06	1207.34	0		0.0530771	0.642454	4.07606	0.609644	0.539363	0.555393	1.41849
5495	Regions/em	1133.06	1207.34	0		0.04916	0.583807	3.09925	0.624633	0.426377	0.663733	1.34927
5496	Regions/em	1143.06	1207.34	0		0.0456291	0.699653	3.30659	0.724865	0.436899	0.568094	1.50041
5497	Regions/em	1153.06	1207.34	0		0.0377002	0.825598	4.64399	0.765643	0.399047	0.513704	1.47072
5498	Regions/em	1163.06	1207.34	0		0.0402438	0.646409	4.04244	0.808707	0.415421	0.56039	1.69366
5499	Regions/em	1173.06	1207.34	0		0.046489	0.606999	3.8657	0.797663	0.414875	0.569068	1.61985
5500	Regions/em	1183.06	1207.34	0		0.0521071	0.616741	4.53147	0.738946	0.417379	0.418376	1.06489
5501	Regions/em	1193.06	1207.34	0		0.0578831	0.698096	2.62434	0.850413	0.391573	0.456329	1.21157
5502	Regions/em	1203.06	1207.34	0		0.0396861	0.500131	3.86221	0.867903	0.412764	0.38127	1.23404
5503	Regions/em	1213.06	1207.34	0		0.0671971	0.510758	3.23199	0.818754	0.395399	0.385102	0.925915
5504	Regions/em	1223.06	1207.34	0		0.0587746	0.497655	3.42038	0.961748	0.383908	0.52449	1.57088
5505	Regions/em	1233.06	1207.34	0		0.0584381	0.459751	3.87999	0.804917	0.359003	0.502504	1.01043
5506	Regions/em	1243.06	1207.34	0		0.0589809	0.466154	3.66356	0.837405	0.354688	0.592186	1.14105
5507	Regions/em	1253.06	1207.34	0		0.0553965	0.419124	3.70638	0.881475	0.315942	0.528686	0.995919
5508	Regions/em	1263.06	1207.34	0		0.0429925	0.446163	2.57651	1.0435	0.308312	0.430242	0.778953
5509	Regions/em	1273.06	1207.34	0		0.049352	0.362435	3.38616	0.896593	0.264578	0.520362	0.92172
5510	Regions/em	1283.06	1207.34	0		0.0682726	0.397312	3.06131	0.979558	0.244486	0.538318	0.824193
5511	Regions/em	1293.06	1207.34	0		0.0518579	0.403898	2.99353	1.10739	0.233979	0.632718	1.00928
5512	Regions/em	1303.06	1207.34	0		0.0596039	0.413995	3.34653	1.02386	0.219374	0.572565	1.04627
5513	Regions/em	1313.06	1207.34	0		0.0484914	0.362352	3.60579	1.14217	0.20981	0.663029	1.16256
5514	Regions/em	1323.06	1207.34	0		0.0370483	0.427254	3.92407	1.03529	0.22509	0.733389	1.30564
5515	Regions/em	1333.06	1207.34	0		0.0425693	0.393171	3.26401	1.20889	0.195743	0.911303	1.62019
5516	Regions/em	1343.06	1207.34	0		0.0509197	0.38453	2.54298	1.13197	0.205978	0.91013	1.51602
5517	Regions/em	1353.06	1207.34	0		0.0436871	0.390204	3.55642	1.07848	0.192393	0.790828	1.59338
5637	Regions/em	483.064	1197.34	0		0.0531156	0.371561	3.35901	1.09822	0.16954	1.09192	1.73203
5638	Regions/em	493.064	1197.34	0		0.048337	0.391488	3.27447	1.14579	0.16742	1.00204	1.89978
5639	Regions/em	503.064	1197.34	0		0.079508	0.369828	2.88974	1.01357	0.173224	0.810997	1.34385
5640	Regions/em	513.064	1197.34	0		0.0793373	0.356848	3.80972	1.06517	0.152657	1.07996	1.62897
5641	Regions/em	523.064	1197.34	0		0.0733192	0.2836	3.5686	1.0405	0.154436	1.01385	1.49582
5642	Regions/em	533.064	1197.34	0		0.0640634	0.434095	2.73837	1.11848	0.140447	1.22334	1.48227
5643	Regions/em	543.064	1197.34	0		0.0803199	0.318183	2.95769	0.873169	0.220729	0.782696	1.42801
5644	Regions/em	553.064	1197.34	0		0.0572315	0.351346	3.52711	0.903127	0.233891	0.705083	1.13742
5645	Regions/em	563.064	1197.34	0		0.040833	0.353951	3.61995	0.980622	0.284597	0.611786	1.62
5646	Regions/em	573.064	1197.34	0		0.0402314	0.439179	3.02333	0.904472	0.278517	0.614325	1.29856
5647	Regions/em	583.064	1197.34	0		0.0411792	0.418731	2.87585	0.991145	0.3219	0.628066	1.26305
5648	Regions/em	593.064	1197.34	0		0.0456382	0.361726	3.93934	0.788792	0.372381	0.570219	1.13178
5649	Regions/em	603.064	1197.34	0		0.0473043	0.330583	2.90345	0.960986	0.466484	0.674475	1.41838
5650	Regions/em	613.064	1197.34	0		0.0352421	0.321843	2.78161	0.710839	0.538052	0.749837	1.23383
5651	Regions/em	623.064	1197.34	0		0.0458738	0.279193	2.86814	0.688738	0.50411	0.693821	1.23411
5652	Regions/em	633.064	1197.34	0		0.0371558	0.356129	2.73772	0.863871	0.418476	0.808994	1.04661
5653	Regions/em	643.064	1197.34	0		0.0454825	0.289447	2.76336	0.84	0.506221	0.79947	1.1084
5654	Regions/em	653.064	1197.34	0		0.0414311	0.372125	2.31175	1.02383	0.404368	0.857541	1.58287
5655	Regions/em	663.064	1197.34	0		0.0359027	0.376584	2.80931	0.950757	0.46899	0.764506	1.06706
5656	Regions/em	673.064	1197.34	0		0.0411745	0.381007	2.40217	0.851547	0.516798	0.926916	1.34075
5657	Regions/em	683.064	1197.34	0		0.052516	0.312066	2.61812	0.78909	0.460637	0.954176	1.04777
5658	Regions/em	693.064	1197.34	0		0.0459822	0.390949	2.19199	1.11202	0.537331	1.18932	1.99459
5659	Regions/em	703.064	1197.34	0		0.0554517	0.31899	2.71131	0.907918	0.427048	1.07356	1.52626
5660	Regions/em	713.064	1197.34	0		0.0418584	0.393264	2.85985	0.888074	0.414375	0.91327	1.20916
5661	Regions/em	723.064	1197.34	0		0.0365454	0.331667	3.06904	0.95465	0.377372	0.888689	1.22425
5662	Regions/em	733.064	1197.34	0		0.0375305	0.354693	2.95098	0.908213	0.321314	1.13801	1.47612
5663	Regions/em	743.064	1197.34	0		0.0233749	0.413431	3.22489	0.905662	0.267686	0.902249	1.23434
5664	Regions/em	753.064	1197.34	0		0.0315888	0.325874	2.7472	1.09019	0.287635	0.613816	0.741195
5665	Regions/em	763.064	1197.34	0		0.0312268	0.377344	3.00262	0.884443	0.324341	0.744733	1.30091
5666	Regions/em	773.064	1197.34	0		0.0270552	0.332818	2.69854	0.837339	0.356752	0.803592	0.967584
5667	Regions/em	783.064	1197.34	0		0.0402753	0.469841	2.21473	0.900545	0.283465	0.877694	0.847573
5668	Regions/em	793.064	1197.34	0		0.023943	0.427434	2.04727	0.978112	0.401074	0.591807	1.08258
5669	Regions/em	803.064	1197.34	0		0.0339906	0.41958	2.52107	0.787977	0.384537	0.762094	0.930729
5670	Regions/em	813.064	1197.34	0		0.0445909	0.41215	2.45259	0.773388	0.50861	0.585381	0.810904
5671	Regions/em	823.064	1197.34	0		0.0432247	0.370201	2.72141	0.730868	0.380375	0.80461	1.07482
5672	Regions/em	833.064	1197.34	0		0.0387187	0.42117	2.30244	0.844452	0.440012	0.614954	0.974864
5673	Regions/em	843.064	1197.34	0		0.043965	0.349609	1.91268	0.780546	0.589662	0.688633	1.06244
5674	Regions/em	853.064	1197.34	0		0.0425179	0.42258	2.17149	0.835464	0.5577	0.868023	1.52534
5675	Regions/em	863.064	1197.34	0		0.03819	0.568643	1.48874	1.01465	0.588259	0.836223	1.07369
5676	Regions/em	873.064	1197.34	0		0.0471629	0.304976	2.31417	0.871446	0.433243	1.02036	1.11541
5677	Regions/em	883.064	1197.34	0		0.0295135	0.391874	2.67469	0.858872	0.393072	1.01652	1.26698
5678	Regions/em	893.064	1197.34	0		0.0391037	0.341452	2.63392	1.03145	0.31513	1.26773	1.38494
5679	Regions/em	903.064	1197.34	0		0.0334387	0.368583	2.41609	0.961975	0.478026	0.853118	1.29682
5680	Regions/em	913.064	1197.34	0		0.038491	0.380189	2.74781	0.886701	0.342238	0.933821	1.0531
5681	Regions/em	923.064	1197.34	0		0.0382937	0.348635	2.56127	1.1	0.421045	1.15705	1.25125
5682	Regions/em	933.064	1197.34	0		0.0397297	0.331483	2.84839	1.06	0.390407	0.910397	1.10363
5683	Regions/em	943.064	1197.34	0		0.0471958	0.356865	2.40856	1.07281	0.355244	1.12147	1.00355
5684	Regions/em	953.064	1197.34	0		0.0412156	0.301534	2.75353	0.900342	0.509347	0.943507	1.34176
5685	Regions/em	963.064	1197.34	0		0.042915	0.369904	2.22867	0.74432	0.565327	0.828133	1.35285
5686	Regions/em	973.064	1197.34	0		0.0492872	0.418533	2.30273	0.83703	0.431565	0.781669	0.993485
5687	Regions/em	983.064	1197.34	0		0.0503158	0.353799	2.38023	0.844874	0.385792	0.767406	0.939142
5688	Regions/em	993.064	1197.34	0		0.0597886	0.3883	2.61106	0.840113	0.604286	0.739216	1.09721
5689	Regions/em	1003.06	1197.34	0		0.0619772	0.369045	2.52789	0.736309	0.634808	0.781999	1.17359
5690	Regions/em	1013.06	1197.34	0		0.048579	0.365688	2.4994	0.829023	0.632085	0.653328	1.32855
5691	Regions/em	1023.06	1197.34	0		0.0399228	0.532976	2.05346	0.863121	0.688521	0.532424	1.21971
5692	Regions/em	1033.06	1197.34	0		0.053408	0.527803	2.87975	0.76728	0.688252	0.357909	0.907765
5693	Regions/em	1043.06	1197.34	0		0.0471488	0.526639	2.83659	0.820439	0.664178	0.381417	0.879064
5694	Regions/em	1053.06	1197.34	0		0.0530524	0.457087	3.30304	0.652381	0.715651	0.490591	1.55283
5695	Regions/em	1063.06	1197.34	0		0.0373112	0.502766	2.6729	0.638975	0.668923	0.54294	1.51904
5696	Regions/em	1073.06	1197.34	0		0.0359944	0.455705	3.05527	0.636289	0.831197	0.534046	1.98577
5697	Regions/em	1083.06	1197.34	0		0.055852	0.532407	2.74185	0.608274	0.706837	0.481102	1.36767
5698	Regions/em	1093.06	1197.34	0		0.0349625	0.613432	3.3601	0.627883	0.753453	0.607204	1.54419
5699	Regions/em	1103.06	1197.34	0		0.0346449	0.453745	3.34149	0.539	0.744699	0.684367	1.74401
5700	Regions/em	1113.06	1197.34	0		0.0310222	0.611033	2.42785	0.683572	0.675033	0.573704	2.44246
5701	Regions/em	1123.06	1197.34	0		0.042858	0.558266	2.49482	0.598392	0.641342	0.591143	1.87563
5702	Regions/em	1133.06	1197.34	0		0.0411277	0.634984	2.88588	0.642744	0.473342	0.594518	1.71063
5703	Regions/em	1143.06	1197.34	0		0.0503867	0.630376	3.8611	0.718123	0.440857	0.512917	1.24133
5704	Regions/em	1153.06	1197.34	0		0.0479249	0.697134	4.68033	0.648238	0.409516	0.591203	1.32037
5705	Regions/em	1163.06	1197.34	0		0.0520539	0.722599	3.76571	0.776811	0.41229	0.567009	1.33034
5706	Regions/em	1173.06	1197.34	0		0.0387456	0.874347	3.03403	0.754406	0.347188	0.525049	1.09878
5707	Regions/em	1183.06	1197.34	0		0.051485	0.76684	5.06861	0.867599	0.365775	0.513571	1.00035
5708	Regions/em	1193.06	1197.34	0		0.0393878	0.625406	3.87554	0.873294	0.383283	0.463396	1.0156
5709	Regions/em	1203.06	1197.34	0		0.0748655	0.587823	4.11624	0.772908	0.444584	0.37033	1.03669
5710	Regions/em	1213.06	1197.34	0		0.058424	0.509799	4.045	0.770321	0.43585	0.466506	1.31941
5711	Regions/em	1223.06	1197.34	0		0.0526461	0.599958	3.40738	0.721302	0.425878	0.450102	1.16787
5712	Regions/em	1233.06	1197.34	0		0.0487689	0.436983	3.17554	0.714308	0.410719	0.438235	1.08426
5713	Regions/em	1243.06	1197.34	0		0.0415885	0.446972	3.6957	0.795934	0.388072	0.542436	1.32115
5714	Regions/em	1253.06	1197.34	0		0.0383825	0.458447	2.43706	0.854163	0.3969	0.42094	0.963488
5715	Regions/em	1263.06	1197.34	0		0.0411599	0.453325	2.45709	0.944429	0.326844	0.528638	1.00898
5716	Regions/em	1273.06	1197.34	0		0.0643214	0.328106	3.73818	0.904885	0.317034	0.444304	0.838733
5717	Regions/em	1283.06	1197.34	0		0.0516587	0.451876	3.34029	0.898609	0.29091	0.538672	0.956278
5718	Regions/em	1293.06	1197.34	0		0.0595561	0.423515	3.22056	1.1157	0.270518	0.603302	1.19209
5719	Regions/em	1303.06	1197.34	0		0.0498629	0.542659	3.34933	1.13335	0.251908	0.547755	0.990721
5720	Regions/em	1313.06	1197.34	0		0.0481474	0.527548	2.5464	1.14803	0.261158	0.668706	1.20086
5721	Regions/em	1323.06	1197.34	0		0.0363155	0.48927	3.79754	0.984599	0.288924	0.67123	1.59457
5722	Regions/em	1333.06	1197.34	0		0.0294842	0.420116	2.6687	0.982	0.280573	0.759568	1.78579
5723	Regions/em	1343.06	1197.34	0		0.0439329	0.407562	3.78907	0.912656	0.215732	0.891807	1.90188
5724	Regions/em	1353.06	1197.34	0		0.0465255	0.387674	4.11255	1.10275	0.213387	0.827417	1.50551
5725	Regions/em	1363.06	1197.34	0		0.0542366	0.381807	3.33225	1.09755	0.191517	0.832285	1.63443
5726	Regions/em	1373.06	1197.34	0		0.0462554	0.347808	3.71919	1.23472	0.172721	0.985361	1.95043
5843	Regions/em	473.064	1187.34	0		0.0404083	0.415304	2.84999	1.07417	0.24324	0.708954	1.80738
5844	Regions/em	483.064	1187.34	0		0.037022	0.380582	3.09489	1.10546	0.169098	0.872982	2.08404
5845	Regions/em	493.064	1187.34	0		0.0455219	0.412453	3.42924	1.0287	0.147834	0.946084	1.6541
5846	Regions/em	503.064	1187.34	0		0.070685	0.419208	2.77324	1.0454	0.170427	1.01915	1.714
5847	Regions/em	513.064	1187.34	0		0.071774	0.345329	3.23817	0.884406	0.167357	1.01343	1.06936
5848	Regions/em	523.064	1187.34	0		0.0553245	0.332619	4.63409	1.02101	0.1881	0.754118	1.70604
5849	Regions/em	533.064	1187.34	0		0.065107	0.407057	3.42011	1.15125	0.180559	0.992681	1.49497
5850	Regions/em	543.064	1187.34	0		0.0661651	0.332939	3.36219	0.883828	0.222468	0.635913	1.18082
5851	Regions/em	553.064	1187.34	0		0.0565913	0.385279	3.68215	0.936256	0.285493	0.571902	1.42034
5852	Regions/em	563.064	1187.34	0		0.0451153	0.344432	3.41449	0.909574	0.325203	0.569293	1.23912
5853	Regions/em	573.064	1187.34	0		0.0409116	0.429387	3.14181	0.898	0.329271	0.623973	1.49399
5854	Regions/em	583.064	1187.34	0		0.0491436	0.333384	2.67539	0.763315	0.38142	0.689524	1.52244
5855	Regions/em	593.064	1187.34	0		0.0462353	0.363723	2.06966	0.903356	0.409637	0.722445	1.29007
5856	Regions/em	603.064	1187.34	0		0.0322545	0.392535	2.65415	0.74	0.451719	1.01922	1.57177
5857	Regions/em	613.064	1187.34	0		0.0472148	0.372712	3.28476	0.728339	0.511563	0.847258	1.33114
5858	Regions/em	623.064	1187.34	0		0.0404093	0.273406	2.63553	0.819899	0.477371	0.983062	1.18778
5859	Regions/em	633.064	1187.34	0		0.0386619	0.352032	2.19581	0.855512	0.418996	0.725957	1.18323
5860	Regions/em	643.064	1187.34	0		0.0307216	0.353036	3.08111	0.862	0.546942	0.723828	1.33521
5861	Regions/em	653.064	1187.34	0		0.0395271	0.302522	2.24289	0.775339	0.486841	0.813449	1.03767
5862	Regions/em	663.064	1187.34	0		0.0448593	0.403601	2.55295	0.831	0.37601	1.14966	1.25978
5863	Regions/em	673.064	1187.34	0		0.0322596	0.329992	3.10159	0.981041	0.500334	0.971216	1.5752
5864	Regions/em	683.064	1187.34	0		0.0443488	0.284158	2.62714	0.928	0.616857	0.85272	1.25787
5865	Regions/em	693.064	1187.34	0		0.0509477	0.400143	2.8644	0.877267	0.43054	1.02629	1.44311
5866	Regions/em	703.064	1187.34	0		0.042009	0.331313	2.51587	0.792414	0.401874	1.12996	1.3804
5867	Regions/em	713.064	1187.34	0		0.0331475	0.31825	2.83132	0.801024	0.500787	0.794684	1.12907
5868	Regions/em	723.064	1187.34	0		0.0266334	0.432542	2.04965	1.16603	0.416098	0.766827	0.998169
5869	Regions/em	733.064	1187.34	0		0.0350852	0.363785	3.26799	0.964	0.355555	0.842641	0.946193
5870	Regions/em	743.064	1187.34	0		0.028401	0.357874	2.53723	0.94	0.360266	1.03987	1.04399
5871	Regions/em	753.064	1187.34	0		0.0313363	0.394377	2.60767	1.02	0.390615	0.879407	1.36167
5872	Regions/em	763.064	1187.34	0		0.0284232	0.400996	2.4534	0.981	0.415347	0.731776	1.01541
5873	Regions/em	773.064	1187.34	0		0.0449961	0.323253	2.64728	0.91	0.366342	1.12044	0.972018
5874	Regions/em	783.064	1187.34	0		0.0352844	0.289359	2.92748	0.996786	0.35824	0.946207	1.09754
5875	Regions/em	793.064	1187.34	0		0.0309449	0.352998	2.99279	0.95	0.309194	1.25178	1.14559
5876	Regions/em	803.064	1187.34	0		0.0421836	0.361226	2.31895	0.963082	0.463063	0.73976	0.956918
5877	Regions/em	813.064	1187.34	0		0.029879	0.489354	2.66804	0.903375	0.429643	0.826037	1.33183
5878	Regions/em	823.064	1187.34	0		0.03027	0.589231	1.97604	1.09	0.496167	0.823329	1.10337
5879	Regions/em	833.064	1187.34	0		0.0445334	0.485125	2.29669	0.882	0.362167	1.17341	1.19164
5880	Regions/em	843.064	1187.34	0		0.0503925	0.378542	1.99886	0.866436	0.482861	0.963532	1.17088
5881	Regions/em	853.064	1187.34	0		0.0500914	0.394694	2.2415	1.00905	0.412103	1.11777	1.17705
5882	Regions/em	863.064	1187.34	0		0.0432093	0.364552	2.70592	0.977	0.476597	0.967603	1.39808
5883	Regions/em	873.064	1187.34	0		0.0612676	0.424895	2.35882	0.932864	0.425527	0.99092	0.966208
5884	Regions/em	883.064	1187.34	0		0.031606	0.340498	2.10042	0.933	0.369422	1.09704	1.33537
5885	Regions/em	893.064	1187.34	0		0.0506125	0.35167	2.53288	0.979287	0.296792	1.30449	1.14963
5886	Regions/em	903.064	1187.34	0		0.0388154	0.381594	2.23789	1.00162	0.404819	0.737021	0.827472
5887	Regions/em	913.064	1187.34	0		0.043657	0.340852	2.78856	0.790839	0.456328	0.942697	0.906826
5888	Regions/em	923.064	1187.34	0		0.0471712	0.488427	2.21673	0.934	0.460455	1.24835	1.24318
5889	Regions/em	933.064	1187.34	0		0.0415117	0.36923	2.73023	0.994339	0.431581	1.25094	1.32814
5890	Regions/em	943.064	1187.34	0		0.0395784	0.343744	2.60186	0.922	0.508473	0.723946	0.910004
5891	Regions/em	953.064	1187.34	0		0.0466517	0.347231	2.57246	0.966046	0.549587	0.840958	1.33055
5892	Regions/em	963.064	1187.34	0		0.0427916	0.446517	2.19676	0.960981	0.481707	0.842377	1.33975
5893	Regions/em	973.064	1187.34	0		0.0398005	0.404541	2.56494	0.881479	0.462261	0.930924	1.24415
5894	Regions/em	983.064	1187.34	0		0.0352693	0.476733	1.89698	0.839494	0.470169	0.829876	1.35461
5895	Regions/em	993.064	1187.34	0		0.038137	0.511076	1.95042	0.912609	0.565135	0.82189	1.12979
5896	Regions/em	1003.06	1187.34	0		0.0487917	0.474274	2.51076	0.928991	0.521263	0.742217	1.09403
5897	Regions/em	1013.06	1187.34	0		0.0389688	0.428462	2.17907	0.889778	0.585439	0.812478	1.56017
5898	Regions/em	1023.06	1187.34	0		0.051942	0.403339	2.51851	0.972945	0.577612	0.594187	0.985568
5899	Regions/em	1033.06	1187.34	0		0.0495935	0.488748	2.06256	0.854063	0.587403	0.793644	1.2401
5900	Regions/em	1043.06	1187.34	0		0.0388989	0.303632	2.85149	0.928952	0.563792	0.526554	1.12036
5901	Regions/em	1053.06	1187.34	0		0.031343	0.468816	2.6506	0.821659	0.620356	0.536428	1.07948
5902	Regions/em	1063.06	1187.34	0		0.0298903	0.531453	2.651	0.838155	0.708044	0.518667	1.42755
5903	Regions/em	1073.06	1187.34	0		0.0341887	0.609702	2.8235	0.762565	0.644366	0.541984	1.73264
5904	Regions/em	1083.06	1187.34	0		0.0340557	0.587497	2.63691	0.749276	0.665913	0.43031	1.09296
5905	Regions/em	1093.06	1187.34	0		0.0323239	0.564017	2.08389	0.821966	0.585115	0.626419	1.82553
5906	Regions/em	1103.06	1187.34	0		0.0288109	0.551791	2.83608	0.68587	0.656597	0.455761	1.43517
5907	Regions/em	1113.06	1187.34	0		0.0367774	0.450788	3.47541	0.596118	0.652334	0.597596	1.80369
5908	Regions/em	1123.06	1187.34	0		0.0388079	0.552232	3.08368	0.586686	0.741765	0.63358	1.58605
5909	Regions/em	1133.06	1187.34	0		0.0423278	0.522537	3.0207	0.711552	0.663184	0.575413	1.32241
5910	Regions/em	1143.06	1187.34	0		0.0341965	0.625035	3.35152	0.692199	0.607836	0.497043	1.28711
5911	Regions/em	1153.06	1187.34	0		0.0341547	0.634241	4.13381	0.773124	0.50541	0.621226	1.58132
5912	Regions/em	1163.06	1187.34	0		0.0570371	0.733291	3.69453	0.648475	0.438776	0.647236	1.19583
5913	Regions/em	1173.06	1187.34	0		0.0437944	0.684773	3.79419	0.757459	0.462766	0.399973	0.769476
5914	Regions/em	1183.06	1187.34	0		0.0347396	0.721051	3.28592	0.703604	0.361298	0.601758	1.23548
5915	Regions/em	1193.06	1187.34	0		0.0428856	0.680925	3.66218	0.738285	0.391277	0.499136	1.00241
5916	Regions/em	1203.06	1187.34	0		0.0489035	0.567907	3.52866	0.710176	0.379525	0.452687	1.37257
5917	Regions/em	1213.06	1187.34	0		0.0492304	0.625679	3.8818	0.715925	0.470603	0.430179	1.16202
5918	Regions/em	1223.06	1187.34	0		0.0389686	0.559795	3.2226	0.765588	0.503759	0.446604	1.19704
5919	Regions/em	1233.06	1187.34	0		0.0496647	0.528364	3.94705	0.741738	0.469493	0.42802	1.09883
5920	Regions/em	1243.06	1187.34	0		0.059028	0.45654	3.22649	0.665048	0.438699	0.525933	1.28453
5921	Regions/em	1253.06	1187.34	0		0.057729	0.403805	3.87844	0.753551	0.429479	0.485298	1.17022
5922	Regions/em	1263.06	1187.34	0		0.0420023	0.54931	2.83642	0.921313	0.41786	0.49667	1.31532
5923	Regions/em	1273.06	1187.34	0		0.0409898	0.473559	3.45524	0.901007	0.329667	0.449347	0.960238
5924	Regions/em	1283.06	1187.34	0		0.0620657	0.487995	3.49415	1.06243	0.335222	0.462983	0.838371
5925	Regions/em	1293.06	1187.34	0		0.0614951	0.467384	3.07483	0.978489	0.280791	0.518959	1.04573
5926	Regions/em	1303.06	1187.34	0		0.0688716	0.428412	3.26946	0.907128	0.272972	0.537684	0.858822
5927	Regions/em	1313.06	1187.34	0		0.0624897	0.382612	3.03683	1.01719	0.276473	0.554964	1.04207
5928	Regions/em	1323.06	1187.34	0		0.057519	0.445605	2.99429	0.833895	0.28898	0.770601	1.62997
5929	Regions/em	1333.06	1187.34	0		0.0460812	0.350442	2.87148	0.773732	0.268299	0.870797	1.55556
5930	Regions/em	1343.06	1187.34	0		0.0462081	0.424229	3.37423	1.05222	0.275298	0.707891	1.70432
5931	Regions/em	1353.06	1187.34	0		0.0545209	0.459995	3.45413	1.04389	0.225913	0.818523	1.4957
5932	Regions/em	1363.06	1187.34	0		0.0433222	0.360415	3.39237	1.13036	0.190143	0.87424	1.47648
5933	Regions/em	1373.06	1187.34	0		0.0482312	0.384072	2.7323	1.08049	0.152484	1.0691	1.67617
5934	Regions/em	1383.06	1187.34	0		0.0452203	0.404782	3.10675	1.12565	0.195547	0.930224	1.59322
5935	Regions/em	1393.06	1187.34	0		0.0492472	0.342737	2.88643	1.09598	0.185969	1.03675	1.36053
6049	Regions/em	463.064	1177.34	0		0.0423975	0.367592	3.56428	0.931034	0.244778	0.710314	1.39257
6050	Regions/em	473.064	1177.34	0		0.0441298	0.370993	3.52688	1.00978	0.221226	0.656352	1.65835
6051	Regions/em	483.064	1177.34	0		0.040884	0.468667	2.86565	1.19858	0.152171	1.15182	2.14654
6052	Regions/em	493.064	1177.34	0		0.0579831	0.443836	2.87126	1.11642	0.154527	0.956341	1.63855
6053	Regions/em	503.064	1177.34	0		0.0594279	0.294498	3.64793	0.995141	0.18331	0.869645	1.83973
6054	Regions/em	513.064	1177.34	0		0.062983	0.357137	3.81457	1.08191	0.179006	0.891127	1.84397
6055	Regions/em	523.064	1177.34	0		0.0742192	0.31785	3.25641	1.0625	0.220614	0.616315	1.25198
6056	Regions/em	533.064	1177.34	0		0.0668799	0.35606	4.04665	0.987871	0.240351	0.626032	1.33612
6057	Regions/em	543.064	1177.34	0		0.04998	0.403142	2.91003	1.11396	0.261864	0.695837	1.32752
6058	Regions/em	553.064	1177.34	0		0.0505079	0.418427	3.38511	0.994227	0.329223	0.465953	0.884088
6059	Regions/em	563.064	1177.34	0		0.0405071	0.466112	2.89164	0.92132	0.317486	0.690174	1.18438
6060	Regions/em	573.064	1177.34	0		0.0454629	0.316765	3.74965	0.891464	0.373943	0.662207	1.49304
6061	Regions/em	583.064	1177.34	0		0.0474598	0.440704	2.85008	0.966686	0.360179	0.763995	1.46414
6062	Regions/em	593.064	1177.34	0		0.0485009	0.349947	2.887	0.819608	0.451662	0.847494	1.19255
6063	Regions/em	603.064	1177.34	0		0.0332396	0.386604	2.49602	0.823138	0.427881	1.0742	1.58776
6064	Regions/em	613.064	1177.34	0		0.0392086	0.411762	2.70044	0.807857	0.439391	1.22212	1.51643
6065	Regions/em	623.064	1177.34	0		0.049053	0.370424	2.56037	0.871	0.491602	1.04299	1.29979
6066	Regions/em	633.064	1177.34	0		0.0285374	0.372029	2.44259	0.996672	0.424279	0.978467	1.45162
6067	Regions/em	643.064	1177.34	0		0.031811	0.348275	3.60421	0.959	0.413711	1.21525	1.52233
6068	Regions/em	653.064	1177.34	0		0.0347742	0.355539	1.92904	0.895569	0.367792	1.24365	1.32361
6069	Regions/em	663.064	1177.34	0		0.0288833	0.427194	2.52505	0.810796	0.570472	0.870467	1.12309
6070	Regions/em	673.064	1177.34	0		0.0375434	0.463991	2.25913	0.875	0.504746	0.976789	1.44215
6071	Regions/em	683.064	1177.34	0		0.0481204	0.352338	2.42929	0.847041	0.469847	1.18749	1.20671
6072	Regions/em	693.064	1177.34	0		0.0498114	0.321805	2.74407	0.789494	0.457062	1.11723	1.42712
6073	Regions/em	703.064	1177.34	0		0.0574856	0.295467	2.08952	0.838185	0.461089	1.32843	1.29615
6074	Regions/em	713.064	1177.34	0		0.0479438	0.360242	2.66544	0.875	0.534615	0.9349	1.07096
6075	Regions/em	723.064	1177.34	0		0.0343577	0.260245	3.18187	1.00455	0.405754	0.940256	1.03065
6076	Regions/em	733.064	1177.34	0		0.0323291	0.359373	3.51767	0.898318	0.435187	1.03459	1.26756
6077	Regions/em	743.064	1177.34	0		0.0368081	0.363686	2.84489	1.11	0.355374	1.52033	1.21111
6078	Regions/em	753.064	1177.34	0		0.0325135	0.395236	2.98549	0.954	0.305014	0.764483	0.881547
6079	Regions/em	763.064	1177.34	0		0.0297367	0.344381	3.00865	0.936725	0.336773	0.927807	0.992595
6080	Regions/em	773.064	1177.34	0		0.0243944	0.27654	2.36635	1.00468	0.370345	1.10625	1.34008
6081	Regions/em	783.064	1177.34	0		0.0307544	0.453647	2.89183	0.915	0.46863	0.869041	0.995316
6082	Regions/em	793.064	1177.34	0		0.0290883	0.336914	2.32961	0.95589	0.50432	0.645162	0.950729
6083	Regions/em	803.064	1177.34	0		0.0284452	0.460763	2.81751	0.923842	0.311929	1.38425	1.31981
6084	Regions/em	813.064	1177.34	0		0.0348842	0.382713	2.46913	0.99857	0.470195	0.894824	1.191
6085	Regions/em	823.064	1177.34	0		0.0375477	0.445298	2.11752	1.00272	0.397929	1.12955	1.31474
6086	Regions/em	833.064	1177.34	0		0.0454868	0.354792	2.95944	1.06347	0.526966	0.832611	1.097
6087	Regions/em	843.064	1177.34	0		0.0493103	0.43339	2.03737	0.842	0.425564	1.01849	1.67591
6088	Regions/em	853.064	1177.34	0		0.0370314	0.387242	2.01098	0.803	0.583716	0.690115	0.962363
6089	Regions/em	863.064	1177.34	0		0.0506466	0.27247	2.32366	0.812272	0.445225	1.33619	1.18659
6090	Regions/em	873.064	1177.34	0		0.0434617	0.287663	2.3309	0.926074	0.419439	1.0068	1.15868
6091	Regions/em	883.064	1177.34	0		0.0414157	0.387378	2.6059	0.964	0.407126	0.975721	1.12009
6092	Regions/em	893.064	1177.34	0		0.0321069	0.357004	2.10539	0.791796	0.377793	1.06004	1.37909
6093	Regions/em	903.064	1177.34	0		0.0260694	0.550499	1.67375	0.887	0.459255	0.561744	0.84352
6094	Regions/em	913.064	1177.34	0		0.0409157	0.33681	2.12007	0.798	0.472085	0.825073	1.11958
6095	Regions/em	923.064	1177.34	0		0.0463444	0.371693	2.25996	0.766999	0.577778	0.941273	1.19244
6096	Regions/em	933.064	1177.34	0		0.0470366	0.373243	2.39209	0.895218	0.459642	1.0359	1.20899
6097	Regions/em	943.064	1177.34	0		0.0516805	0.341529	1.88765	0.872816	0.488393	1.05766	1.17244
6098	Regions/em	953.064	1177.34	0		0.058434	0.298789	2.55198	0.894969	0.523128	0.844132	1.05503
6099	Regions/em	963.064	1177.34	0		0.0380254	0.364351	2.10962	0.945018	0.503096	1.10959	1.50196
6100	Regions/em	973.064	1177.34	0		0.0403958	0.454542	2.60017	1.05247	0.53035	0.949595	1.3086
6101	Regions/em	983.064	1177.34	0		0.0487105	0.426088	2.54832	0.868862	0.436634	1.0585	1.35691
6102	Regions/em	993.064	1177.34	0		0.0486274	0.338688	2.48659	0.901527	0.591541	0.935987	1.2614
6103	Regions/em	1003.06	1177.34	0		0.047317	0.399206	2.99242	0.900784	0.51198	0.960334	1.38741
6104	Regions/em	1013.06	1177.34	0		0.0339175	0.375247	2.92716	0.955807	0.523098	0.779488	1.46356
6105	Regions/em	1023.06	1177.34	0		0.0496627	0.347359	2.13693	0.932	0.617056	0.96443	1.93349
6106	Regions/em	1033.06	1177.34	0		0.0380707	0.374075	3.00474	0.911837	0.47545	0.951194	1.6118
6107	Regions/em	1043.06	1177.34	0		0.0363837	0.446679	2.01208	1.14	0.562447	0.834201	1.67339
6108	Regions/em	1053.06	1177.34	0		0.0527893	0.399119	2.28864	0.858	0.624988	0.605903	0.962809
6109	Regions/em	1063.06	1177.34	0		0.048692	0.408008	2.85817	0.84463	0.675679	0.654805	1.23441
6110	Regions/em	1073.06	1177.34	0		0.0414058	0.492809	2.68972	0.856709	0.680737	0.603831	1.35256
6111	Regions/em	1083.06	1177.34	0		0.0408372	0.612641	2.46909	0.875858	0.594301	0.561549	1.35471
6112	Regions/em	1093.06	1177.34	0		0.0345361	0.577379	2.55097	0.788394	0.681118	0.46595	1.18762
6113	Regions/em	1103.06	1177.34	0		0.034496	0.528557	3.00591	0.798947	0.626246	0.45694	1.04244
6114	Regions/em	1113.06	1177.34	0		0.0291427	0.587336	3.07034	0.675934	0.738669	0.499999	1.85055
6115	Regions/em	1123.06	1177.34	0		0.0293268	0.536894	2.69891	0.661601	0.774653	0.605704	1.56454
6116	Regions/em	1133.06	1177.34	0		0.031259	0.506688	2.86735	0.730637	0.745901	0.535178	1.35197
6117	Regions/em	1143.06	1177.34	0		0.0320589	0.51827	3.53589	0.767262	0.667793	0.601762	1.4696
6118	Regions/em	1153.06	1177.34	0		0.0414515	0.46097	3.35682	0.814341	0.537457	0.659892	1.32683
6119	Regions/em	1163.06	1177.34	0		0.0351232	0.662493	3.16575	0.751178	0.52865	0.670943	1.47417
6120	Regions/em	1173.06	1177.34	0		0.0416489	0.592746	3.18855	0.72569	0.541159	0.481864	1.24293
6121	Regions/em	1183.06	1177.34	0		0.0339108	0.759898	3.05111	0.813023	0.530092	0.479641	1.19369
6122	Regions/em	1193.06	1177.34	0		0.0560519	0.611712	3.08604	0.7772	0.444658	0.545002	1.13126
6123	Regions/em	1203.06	1177.34	0		0.0535956	0.824314	3.63399	0.805662	0.410359	0.665261	1.35889
6124	Regions/em	1213.06	1177.34	0		0.0537614	0.526939	3.4021	0.675532	0.506283	0.437531	1.32996
6125	Regions/em	1223.06	1177.34	0		0.0358102	0.548321	3.65023	0.676833	0.658732	0.393607	1.34433
6126	Regions/em	1233.06	1177.34	0		0.0571777	0.514843	3.79128	0.690691	0.553632	0.436673	1.31325
6127	Regions/em	1243.06	1177.34	0		0.0329443	0.6034	3.26859	0.816311	0.458643	0.456334	1.55453
6128	Regions/em	1253.06	1177.34	0		0.0370085	0.623357	3.13709	0.8673	0.478136	0.537908	1.61279
6129	Regions/em	1263.06	1177.34	0		0.0416116	0.462739	3.11978	0.794739	0.483347	0.482694	1.07507
6130	Regions/em	1273.06	1177.34	0		0.0458329	0.539227	3.47132	0.78645	0.460194	0.554336	1.25153
6131	Regions/em	1283.06	1177.34	0		0.0536412	0.510509	3.2803	0.856383	0.321237	0.551322	1.09543
6132	Regions/em	1293.06	1177.34	0		0.0525297	0.549218	3.26244	0.943212	0.290838	0.586989	1.18802
6133	Regions/em	1303.06	1177.34	0		0.0612895	0.402194	3.75181	0.849492	0.335479	0.634985	1.07789
6134	Regions/em	1313.06	1177.34	0		0.0706624	0.360351	2.85626	0.936942	0.281599	0.611902	1.22811
6135	Regions/em	1323.06	1177.34	0		0.0473172	0.459342	3.13307	0.949554	0.320746	0.612951	1.42687
6136	Regions/em	1333.06	1177.34	0		0.0477572	0.490751	3.03414	0.93098	0.295368	0.684163	1.38804
6137	Regions/em	1343.06	1177.34	0		0.0476228	0.364909	3.23866	0.901233	0.297832	0.567868	1.30082
6138	Regions/em	1353.06	1177.34	0		0.0545951	0.332539	3.90237	0.970845	0.234134	0.706072	1.11783
6139	Regions/em	1363.06	1177.34	0		0.044704	0.431084	3.31763	1.06656	0.193057	0.998126	1.45473
6140	Regions/em	1373.06	1177.34	0		0.0452594	0.434891	3.01751	1.08461	0.18847	0.842961	1.51979
6141	Regions/em	1383.06	1177.34	0		0.0380768	0.435513	2.69671	1.11	0.238114	0.546352	0.87617
6142	Regions/em	1393.06	1177.34	0		0.042645	0.388169	3.36527	1.05	0.213899	1.0008	2.13053
6143	Regions/em	1403.06	1177.34	0		0.0395408	0.323624	3.42425	1.08766	0.172246	0.958825	1.59094
6144	Regions/em	1413.06	1177.34	0		0.0426818	0.370799	3.24933	1.14239	0.170167	0.986677	1.47727
6255	Regions/em	453.064	1167.34	0		0.0538268	0.364012	3.49868	1.0464	0.254131	0.635644	1.23675
6256	Regions/em	463.064	1167.34	0		0.0399172	0.391026	3.42797	1.06	0.23599	0.865226	1.71672
6257	Regions/em	473.064	1167.34	0		0.0578715	0.389195	4.03502	1.13046	0.203052	0.741603	1.40636
6258	Regions/em	483.064	1167.34	0		0.0456908	0.39593	3.00515	1.0907	0.145179	1.07953	1.49599
6259	Regions/em	493.064	1167.34	0		0.0439023	0.442061	3.4184	1.22491	0.179209	0.726415	1.18018
6260	Regions/em	503.064	1167.34	0		0.0477135	0.334252	3.42741	1.00578	0.167317	0.936581	1.66856
6261	Regions/em	513.064	1167.34	0		0.0516022	0.395594	3.85265	1.06558	0.189121	0.941925	1.72696
6262	Regions/em	523.064	1167.34	0		0.0505942	0.331653	3.889	0.970153	0.216933	0.690278	1.61854
6263	Regions/em	533.064	1167.34	0		0.0495086	0.38809	3.75744	0.964696	0.228346	0.824293	1.36426
6264	Regions/em	543.064	1167.34	0		0.0423834	0.437106	3.55681	0.905114	0.279261	0.757424	1.68017
6265	Regions/em	553.064	1167.34	0		0.0437363	0.390224	3.37692	0.937826	0.336563	0.615564	1.05294
6266	Regions/em	563.064	1167.34	0		0.0496522	0.292875	3.62616	1.02662	0.320901	0.69865	1.05931
6267	Regions/em	573.064	1167.34	0		0.0451381	0.304372	3.36939	0.902141	0.401467	0.738276	1.4021
6268	Regions/em	583.064	1167.34	0		0.0395838	0.288623	3.30984	0.920094	0.42883	0.736403	1.51355
6269	Regions/em	593.064	1167.34	0		0.029809	0.402169	2.21099	0.906724	0.339038	1.01714	1.22889
6270	Regions/em	603.064	1167.34	0		0.0436058	0.271564	2.63485	0.940382	0.425187	0.939442	1.11847
6271	Regions/em	613.064	1167.34	0		0.0424617	0.303484	3.04442	0.833801	0.438226	1.01539	1.16089
6272	Regions/em	623.064	1167.34	0		0.0347896	0.462631	2.56217	1.05583	0.432251	1.12623	1.42653
6273	Regions/em	633.064	1167.34	0		0.0453215	0.30184	2.50359	0.754995	0.455713	1.07149	1.00802
6274	Regions/em	643.064	1167.34	0		0.0498674	0.293668	2.03837	0.872	0.51382	1.0799	1.86763
6275	Regions/em	653.064	1167.34	0		0.0337668	0.36406	2.33458	1.02912	0.407473	0.928531	1.09268
6276	Regions/em	663.064	1167.34	0		0.029945	0.361403	3.60849	0.961706	0.427072	1.53829	1.12648
6277	Regions/em	673.064	1167.34	0		0.0328474	0.424669	2.50636	0.988979	0.468226	1.11315	1.28215
6278	Regions/em	683.064	1167.34	0		0.0307602	0.372068	2.46519	0.973697	0.50269	1.13172	1.45991
6279	Regions/em	693.064	1167.34	0		0.0474057	0.277281	2.61257	0.830411	0.518539	1.09822	1.66663
6280	Regions/em	703.064	1167.34	0		0.045999	0.326656	2.77318	0.947123	0.480463	1.07896	1.41591
6281	Regions/em	713.064	1167.34	0		0.0490569	0.329809	2.69664	0.795	0.527751	1.20891	1.19032
6282	Regions/em	723.064	1167.34	0		0.0420686	0.303213	2.6449	0.854178	0.401812	1.03513	1.02933
6283	Regions/em	733.064	1167.34	0		0.0403344	0.42332	2.33943	0.973053	0.376665	0.908388	0.796183
6284	Regions/em	743.064	1167.34	0		0.0308287	0.394972	2.52098	1.01	0.386991	1.07171	1.04452
6285	Regions/em	753.064	1167.34	0		0.0239406	0.512944	2.52617	1.1364	0.424376	1.118	1.22775
6286	Regions/em	763.064	1167.34	0		0.0256645	0.465423	2.54461	0.84	0.268467	1.09424	1.44827
6287	Regions/em	773.064	1167.34	0		0.0218389	0.339725	2.87963	0.9	0.502965	0.73312	1.03447
6288	Regions/em	783.064	1167.34	0		0.0383255	0.366463	2.02979	0.878375	0.381446	0.914383	1.09354
6289	Regions/em	793.064	1167.34	0		0.0292334	0.360627	2.72061	1.20282	0.504978	1.10137	1.12724
6290	Regions/em	803.064	1167.34	0		0.0283245	0.367501	2.9327	1.11399	0.455361	0.775891	1.18214
6291	Regions/em	813.064	1167.34	0		0.0338819	0.366164	2.64633	1.09476	0.470944	0.746233	1.04812
6292	Regions/em	823.064	1167.34	0		0.0391722	0.545374	2.74047	1.01	0.453744	1.34525	1.17085
6293	Regions/em	833.064	1167.34	0		0.0408787	0.27984	3.03978	1.13938	0.48735	0.80055	1.1895
6294	Regions/em	843.064	1167.34	0		0.0492792	0.375965	2.52306	0.819134	0.426665	1.0395	1.16462
6295	Regions/em	853.064	1167.34	0		0.0401268	0.313464	2.43723	0.94976	0.549857	0.839134	1.11132
6296	Regions/em	863.064	1167.34	0		0.0517294	0.334015	2.8344	0.900226	0.47197	1.02894	1.24791
6297	Regions/em	873.064	1167.34	0		0.0535956	0.380133	2.39031	0.819658	0.379648	1.13493	1.10217
6298	Regions/em	883.064	1167.34	0		0.0394986	0.347636	2.35168	0.854359	0.781199	0.565758	0.896646
6299	Regions/em	893.064	1167.34	0		0.0455607	0.456566	2.32559	0.823824	0.418985	1.20026	1.15626
6300	Regions/em	903.064	1167.34	0		0.0286624	0.397605	2.55709	0.976	0.447634	0.738831	0.989918
6301	Regions/em	913.064	1167.34	0		0.0307656	0.376299	2.47511	0.868186	0.470415	1.02854	1.66279
6302	Regions/em	923.064	1167.34	0		0.0350055	0.447308	2.05738	0.929044	0.539102	0.890304	1.26823
6303	Regions/em	933.064	1167.34	0		0.055476	0.373022	2.13854	0.887335	0.547021	0.714374	0.914324
6304	Regions/em	943.064	1167.34	0		0.0434272	0.432651	2.36896	1.02241	0.597161	0.686513	1.16368
6305	Regions/em	953.064	1167.34	0		0.0355347	0.386559	2.47083	0.975516	0.673479	0.774876	1.48694
6306	Regions/em	963.064	1167.34	0		0.0456288	0.408231	2.59585	0.788954	0.657697	0.648624	1.50158
6307	Regions/em	973.064	1167.34	0		0.0441172	0.401096	2.27364	0.855587	0.58221	0.741427	0.957542
6308	Regions/em	983.064	1167.34	0		0.0382056	0.482774	2.59877	0.984849	0.627787	0.877142	1.51371
6309	Regions/em	993.064	1167.34	0		0.0351208	0.345163	2.30485	1.13	0.600385	1.00838	1.7847
6310	Regions/em	1003.06	1167.34	0		0.0387666	0.463698	2.08329	0.849	0.502096	0.75928	1.03312
6311	Regions/em	1013.06	1167.34	0		0.0422881	0.438304	2.09242	0.950769	0.518099	0.847537	1.25337
6312	Regions/em	1023.06	1167.34	0		0.0334854	0.387135	2.16716	1.01125	0.561878	0.746199	1.16422
6313	Regions/em	1033.06	1167.34	0		0.0266986	0.477539	2.14763	1.04	0.588822	0.825421	1.44135
6314	Regions/em	1043.06	1167.34	0		0.0344662	0.334098	2.82758	1.07687	0.713106	0.722688	1.22105
6315	Regions/em	1053.06	1167.34	0		0.0432497	0.434446	2.63714	0.911955	0.718356	0.613397	0.907577
6316	Regions/em	1063.06	1167.34	0		0.0382494	0.405661	2.36362	0.801638	0.634095	0.822986	1.33621
6317	Regions/em	1073.06	1167.34	0		0.0563781	0.50202	1.88259	0.843	0.719847	0.631084	1.2043
6318	Regions/em	1083.06	1167.34	0		0.0515735	0.446665	3.03784	0.771894	0.65174	0.535361	0.984966
6319	Regions/em	1093.06	1167.34	0		0.0487038	0.484115	2.39941	0.978717	0.733117	0.467973	1.02664
6320	Regions/em	1103.06	1167.34	0		0.0454573	0.449591	2.91076	0.798371	0.723119	0.540942	1.3106
6321	Regions/em	1113.06	1167.34	0		0.0269722	0.539238	2.75473	0.823297	0.742431	0.560162	1.61205
6322	Regions/em	1123.06	1167.34	0		0.0278794	0.428993	3.21648	0.775013	0.694633	0.604616	1.45574
6323	Regions/em	1133.06	1167.34	0		0.0358537	0.450748	3.36646	0.727913	0.617642	0.63528	1.49919
6324	Regions/em	1143.06	1167.34	0		0.03492	0.419577	3.3486	0.756094	0.55486	0.579407	1.23252
6325	Regions/em	1153.06	1167.34	0		0.0320015	0.469642	3.65088	0.82333	0.613711	0.600772	1.18408
6326	Regions/em	1163.06	1167.34	0		0.0438584	0.523774	2.64829	0.702	0.655515	0.430559	0.939442
6327	Regions/em	1173.06	1167.34	0		0.0364501	0.493129	3.43049	0.737909	0.529603	0.641585	1.59997
6328	Regions/em	1183.06	1167.34	0		0.0376636	0.619944	2.88838	0.7611	0.541108	0.575196	1.29056
6329	Regions/em	1193.06	1167.34	0		0.032392	0.664962	2.99291	0.788679	0.49657	0.486911	1.03314
6330	Regions/em	1203.06	1167.34	0		0.0389171	0.610386	3.47392	0.869755	0.450091	0.54896	1.25607
6331	Regions/em	1213.06	1167.34	0		0.0398618	0.57483	3.30835	0.668757	0.601363	0.46773	1.41936
6332	Regions/em	1223.06	1167.34	0		0.0486611	0.53413	3.66706	0.647008	0.777095	0.401443	1.27202
6333	Regions/em	1233.06	1167.34	0		0.0456517	0.566142	2.81779	0.691173	0.699256	0.369744	1.57987
6334	Regions/em	1243.06	1167.34	0		0.0360384	0.65811	3.26944	0.65	0.529298	0.395742	1.56518
6335	Regions/em	1253.06	1167.34	0		0.0511971	0.575917	3.5168	0.656437	0.582397	0.437974	1.15863
6336	Regions/em	1263.06	1167.34	0		0.0499928	0.628209	2.9486	0.798692	0.578406	0.453736	1.39225
6337	Regions/em	1273.06	1167.34	0		0.0510503	0.59619	2.37014	0.705334	0.49935	0.485571	1.41299
6338	Regions/em	1283.06	1167.34	0		0.0483567	0.463832	3.21946	0.613786	0.595627	0.517878	1.51558
6339	Regions/em	1293.06	1167.34	0		0.0452508	0.455109	2.82355	0.715702	0.517129	0.534334	1.54447
6340	Regions/em	1303.06	1167.34	0		0.0420995	0.369512	3.61544	0.783497	0.494345	0.460846	1.32011
6341	Regions/em	1313.06	1167.34	0		0.0560417	0.375311	3.53106	0.710227	0.435469	0.563356	1.7425
6342	Regions/em	1323.06	1167.34	0		0.0499521	0.471825	2.81776	0.837621	0.32381	0.621229	1.49471
6343	Regions/em	1333.06	1167.34	0		0.0546768	0.382449	2.9757	0.777177	0.340907	0.538819	1.35108
6344	Regions/em	1343.06	1167.34	0		0.0434374	0.397156	3.33038	0.88299	0.311091	0.74254	2.00728
6345	Regions/em	1353.06	1167.34	0		0.0622267	0.461985	2.76539	0.947455	0.233615	0.741597	1.25113
6346	Regions/em	1363.06	1167.34	0		0.0615146	0.44286	2.95463	0.972665	0.215492	0.891148	1.81421
6347	Regions/em	1373.06	1167.34	0		0.0509573	0.333199	3.33405	0.960241	0.240593	0.757207	1.55938
6348	Regions/em	1383.06	1167.34	0		0.0366406	0.347525	2.82409	1.07958	0.251436	0.723841	1.78549
6349	Regions/em	1393.06	1167.34	0		0.0421602	0.376373	2.99015	1.07129	0.242322	0.771783	1.50002
6350	Regions/em	1403.06	1167.34	0		0.0490799	0.326575	3.76582	1.11727	0.203327	0.84231	1.30332
6351	Regions/em	1413.06	1167.34	0		0.0429544	0.36131	3.94902	1.05	0.208554	0.862826	1.38543
6352	Regions/em	1423.06	1167.34	0		0.0582123	0.368069	2.83889	1.10818	0.175141	1.1567	1.40666
6353	Regions/em	1433.06	1167.34	0		0.0468776	0.324388	2.87955	1.04631	0.184806	1.00594	1.24204
6462	Regions/em	453.064	1157.34	0		0.0403895	0.451709	2.74248	1.03491	0.229516	0.711072	2.03982
6463	Regions/em	463.064	1157.34	0		0.0409152	0.37136	2.86992	1.23921	0.265959	0.637346	1.59479
6464	Regions/em	473.064	1157.34	0		0.0570209	0.397695	3.06369	1.16231	0.212987	0.76465	1.4521
6465	Regions/em	483.064	1157.34	0		0.0396974	0.332583	2.85078	1.14166	0.165243	0.954726	1.26451
6466	Regions/em	493.064	1157.34	0		0.0528085	0.530191	3.52686	1.11636	0.187376	0.848731	1.44422
6467	Regions/em	503.064	1157.34	0		0.045704	0.37143	3.42619	1.06629	0.236363	0.688775	1.5507
6468	Regions/em	513.064	1157.34	0		0.051803	0.354632	3.69241	1.11769	0.199675	0.794716	1.73896
6469	Regions/em	523.064	1157.34	0		0.0707803	0.34932	3.46618	0.936598	0.227134	0.694403	1.38979
6470	Regions/em	533.064	1157.34	0		0.0446235	0.376974	3.60147	0.917427	0.232349	0.896134	1.14275
6471	Regions/em	543.064	1157.34	0		0.0399051	0.379781	4.00634	0.919971	0.26058	0.75525	1.17867
6472	Regions/em	553.064	1157.34	0		0.040327	0.399961	3.15156	1.04737	0.300389	0.754204	1.2383
6473	Regions/em	563.064	1157.34	0		0.0298358	0.383561	2.44991	1.03	0.316254	0.708184	1.13975
6474	Regions/em	573.064	1157.34	0		0.0380013	0.324519	2.79592	0.997848	0.418823	0.891	1.21243
6475	Regions/em	583.064	1157.34	0		0.0331342	0.328242	4.57707	0.960259	0.375648	0.897781	1.20222
6476	Regions/em	593.064	1157.34	0		0.0320247	0.304772	2.62055	0.862462	0.49331	0.892484	1.35125
6477	Regions/em	603.064	1157.34	0		0.0528391	0.359836	2.69199	0.924019	0.544823	0.77066	1.17173
6478	Regions/em	613.064	1157.34	0		0.0428948	0.356302	2.68899	0.962037	0.524736	0.851785	1.11008
6479	Regions/em	623.064	1157.34	0		0.0429303	0.305144	2.79161	0.946989	0.53898	1.10906	1.4851
6480	Regions/em	633.064	1157.34	0		0.0335889	0.31739	2.30991	0.911902	0.522006	0.972974	1.23239
6481	Regions/em	643.064	1157.34	0		0.0270585	0.348302	2.07356	0.923194	0.523421	0.954067	1.32121
6482	Regions/em	653.064	1157.34	0		0.0326075	0.315386	3.35647	0.941642	0.395683	1.18325	0.989728
6483	Regions/em	663.064	1157.34	0		0.0394485	0.300866	2.84989	0.911966	0.500795	1.23126	1.09122
6484	Regions/em	673.064	1157.34	0		0.0433388	0.337533	2.12461	0.848535	0.541826	1.01775	1.13949
6485	Regions/em	683.064	1157.34	0		0.0389123	0.31575	2.33894	0.880982	0.53439	1.15203	1.647
6486	Regions/em	693.064	1157.34	0		0.0361798	0.445721	2.47273	0.937065	0.52555	1.14759	1.41964
6487	Regions/em	703.064	1157.34	0		0.0640493	0.415516	1.97766	1.05	0.397327	1.44883	1.17721
6488	Regions/em	713.064	1157.34	0		0.0396084	0.437295	2.07458	0.882786	0.445231	1.18388	1.28822
6489	Regions/em	723.064	1157.34	0		0.0394532	0.367453	2.45246	0.889527	0.437418	1.05472	0.91267
6490	Regions/em	733.064	1157.34	0		0.0261914	0.431273	2.17648	0.991622	0.355073	1.05721	1.13207
6491	Regions/em	743.064	1157.34	0		0.0279357	0.279747	2.47266	0.919	0.381919	1.1985	1.11317
6492	Regions/em	753.064	1157.34	0		0.0447547	0.421745	2.15749	0.859053	0.501578	1.11541	1.11213
6493	Regions/em	763.064	1157.34	0		0.0380554	0.344448	2.36288	0.804	0.461217	0.687193	0.660644
6494	Regions/em	773.064	1157.34	0		0.0276608	0.447628	1.89875	1.01	0.426162	0.810352	0.985673
6495	Regions/em	783.064	1157.34	0		0.0375591	0.361481	2.48222	0.895336	0.562483	0.863715	1.15822
6496	Regions/em	793.064	1157.34	0		0.0441539	0.358412	2.21554	1.06395	0.657799	0.728622	0.871007
6497	Regions/em	803.064	1157.34	0		0.0328067	0.340248	2.09743	0.795835	0.420827	0.914814	1.08633
6498	Regions/em	813.064	1157.34	0		0.0462309	0.418523	2.45191	0.948878	0.526569	0.8353	1.06606
6499	Regions/em	823.064	1157.34	0		0.0455512	0.487141	2.01204	0.879304	0.53529	1.06213	1.55621
6500	Regions/em	833.064	1157.34	0		0.0363688	0.450781	2.10042	0.855	0.567728	0.743355	0.979511
6501	Regions/em	843.064	1157.34	0		0.0346078	0.488635	1.69328	0.760947	0.480945	0.822734	0.905241
6502	Regions/em	853.064	1157.34	0		0.0283623	0.436836	1.94638	0.905539	0.557917	0.74768	1.00318
6503	Regions/em	863.064	1157.34	0		0.047986	0.36822	2.10541	0.847803	0.77739	0.892421	1.31989
6504	Regions/em	873.064	1157.34	0		0.0372104	0.376522	2.37054	0.84264	0.569312	0.980148	1.26793
6505	Regions/em	883.064	1157.34	0		0.0390869	0.510278	2.18449	0.760317	0.542629	0.995173	1.35311
6506	Regions/em	893.064	1157.34	0		0.030234	0.421347	1.9435	0.769	0.568625	0.755607	1.40084
6507	Regions/em	903.064	1157.34	0		0.0316638	0.583165	2.17502	0.866	0.649597	0.498037	0.982867
6508	Regions/em	913.064	1157.34	0		0.0334937	0.437158	2.40417	0.792589	0.559879	0.672792	1.28189
6509	Regions/em	923.064	1157.34	0		0.0370646	0.704754	1.95244	0.807036	0.764103	0.56105	1.27058
6510	Regions/em	933.064	1157.34	0		0.0401185	0.515093	1.39196	0.760371	0.673186	0.661784	1.15201
6511	Regions/em	943.064	1157.34	0		0.0372566	0.610199	1.50843	0.808032	0.727875	0.617136	1.62477
6512	Regions/em	953.064	1157.34	0		0.0394534	0.526056	1.76172	0.681544	0.807239	0.567577	1.22809
6513	Regions/em	963.064	1157.34	0		0.0445972	0.495646	2.05169	0.892344	0.700431	0.615963	1.11818
6514	Regions/em	973.064	1157.34	0		0.044601	0.383016	2.74571	0.935843	0.63585	0.739172	1.29277
6515	Regions/em	983.064	1157.34	0		0.0353475	0.439363	2.1776	0.930282	0.722808	0.687807	1.2661
6516	Regions/em	993.064	1157.34	0		0.0421184	0.428888	2.02724	0.959543	0.726355	0.610936	1.15408
6517	Regions/em	1003.06	1157.34	0		0.0307608	0.436817	2.082	0.890545	0.62228	0.693192	1.60467
6518	Regions/em	1013.06	1157.34	0		0.0387188	0.524826	1.85029	0.959647	0.727378	0.686609	1.72202
6519	Regions/em	1023.06	1157.34	0		0.0401984	0.476642	1.91338	0.877572	0.743242	0.763882	1.58942
6520	Regions/em	1033.06	1157.34	0		0.045478	0.494772	1.82456	0.79786	0.665589	0.614975	1.51012
6521	Regions/em	1043.06	1157.34	0		0.0409153	0.506439	1.64719	0.751145	0.934803	0.541743	1.37839
6522	Regions/em	1053.06	1157.34	0		0.042049	0.562864	2.14945	0.815241	0.751774	0.506051	0.954806
6523	Regions/em	1063.06	1157.34	0		0.0500399	0.419513	2.64233	0.855752	0.850187	0.59116	1.27183
6524	Regions/em	1073.06	1157.34	0		0.0333451	0.570604	1.63394	0.854785	0.681012	0.732286	1.82498
6525	Regions/em	1083.06	1157.34	0		0.0372096	0.615259	2.18098	0.905336	0.785862	0.567402	1.67888
6526	Regions/em	1093.06	1157.34	0		0.0402952	0.590195	1.82909	0.849734	0.841082	0.561588	1.5711
6527	Regions/em	1103.06	1157.34	0		0.041299	0.448982	2.21937	0.844814	0.721857	0.642573	1.30754
6528	Regions/em	1113.06	1157.34	0		0.0311301	0.437332	2.11616	0.94498	0.848394	0.390748	1.06276
6529	Regions/em	1123.06	1157.34	0		0.028665	0.497208	2.47729	0.904292	0.573901	0.540741	1.25943
6530	Regions/em	1133.06	1157.34	0		0.0396926	0.383768	3.02808	0.780821	0.590765	0.5676	1.06847
6531	Regions/em	1143.06	1157.34	0		0.0269963	0.470879	2.88456	0.82302	0.642283	0.663838	1.18104
6532	Regions/em	1153.06	1157.34	0		0.0471911	0.470045	3.36772	0.86519	0.665897	0.671123	1.45687
6533	Regions/em	1163.06	1157.34	0		0.0429222	0.477688	2.98452	0.827964	0.598125	0.625208	1.21601
6534	Regions/em	1173.06	1157.34	0		0.0415238	0.500802	2.98699	0.941314	0.582298	0.627276	1.42599
6535	Regions/em	1183.06	1157.34	0		0.0406941	0.515098	3.33485	0.801443	0.552426	0.564328	1.34982
6536	Regions/em	1193.06	1157.34	0		0.0341632	0.526047	3.30214	0.82819	0.480335	0.612032	1.13057
6537	Regions/em	1203.06	1157.34	0		0.0368033	0.532555	3.43174	0.802442	0.586078	0.474421	1.0463
6538	Regions/em	1213.06	1157.34	0		0.0390643	0.512841	3.07958	0.672479	0.677613	0.563508	1.55471
6539	Regions/em	1223.06	1157.34	0		0.0499896	0.568789	2.82228	0.58729	0.828782	0.371951	1.28763
6540	Regions/em	1233.06	1157.34	0		0.0471663	0.47958	3.5669	0.688423	0.703356	0.400982	1.36339
6541	Regions/em	1243.06	1157.34	0		0.0509763	0.49941	3.56062	0.756531	0.61967	0.455777	1.37201
6542	Regions/em	1253.06	1157.34	0		0.0376247	0.607335	3.10446	0.729401	0.57675	0.488377	1.43354
6543	Regions/em	1263.06	1157.34	0		0.0584772	0.509669	2.95503	0.642264	0.653989	0.448814	1.28756
6544	Regions/em	1273.06	1157.34	0		0.0397727	0.517388	3.52884	0.657798	0.79007	0.410809	1.93386
6545	Regions/em	1283.06	1157.34	0		0.0505252	0.516384	2.82401	0.690312	0.696488	0.45007	1.27431
6546	Regions/em	1293.06	1157.34	0		0.0402781	0.517437	2.86104	0.84029	0.643983	0.459339	1.31816
6547	Regions/em	1303.06	1157.34	0		0.0355301	0.513701	2.88324	0.804042	0.61379	0.447357	1.41575
6548	Regions/em	1313.06	1157.34	0		0.0496831	0.51303	3.17406	0.824039	0.392454	0.570312	1.23321
6549	Regions/em	1323.06	1157.34	0		0.0531107	0.520897	2.58275	0.831787	0.412049	0.502572	1.31287
6550	Regions/em	1333.06	1157.34	0		0.0535187	0.457299	3.15004	0.85743	0.405727	0.454369	1.27018
6551	Regions/em	1343.06	1157.34	0		0.0512636	0.466943	2.36074	0.895988	0.317205	0.613314	1.68491
6552	Regions/em	1353.06	1157.34	0		0.0420651	0.455144	2.69883	1.06331	0.260463	0.757441	1.76397
6553	Regions/em	1363.06	1157.34	0		0.0596247	0.385896	3.09405	0.723647	0.231803	0.730319	1.40216
6554	Regions/em	1373.06	1157.34	0		0.0546988	0.360211	2.88213	0.900237	0.215373	0.91671	1.48376
6555	Regions/em	1383.06	1157.34	0		0.051566	0.388005	2.84541	1.01217	0.21474	0.76443	1.54474
6556	Regions/em	1393.06	1157.34	0		0.0456724	0.421786	4.06478	1.00456	0.224695	0.765972	1.39773
6557	Regions/em	1403.06	1157.34	0		0.050324	0.381888	5.10411	1.04508	0.213081	0.728418	1.32526
6558	Regions/em	1413.06	1157.34	0		0.0428748	0.348398	3.18551	1.13554	0.215049	0.730989	1.41244
6559	Regions/em	1423.06	1157.34	0		0.053295	0.304486	3.08415	1.32024	0.210279	0.822102	1.37091
6560	Regions/em	1433.06	1157.34	0		0.0588131	0.32714	3.21228	1.12585	0.184283	1.04464	1.44131
6561	Regions/em	1443.06	1157.34	0		0.0508817	0.346015	3.2786	1.01576	0.194874	0.899019	1.51118
6562	Regions/em	1453.06	1157.34	0		0.053321	0.371171	3.24343	1.08333	0.17854	0.88378	1.26991
6668	Regions/em	443.064	1147.34	0		0.0347548	0.359822	3.37143	1.08371	0.212192	0.814707	1.28917
6669	Regions/em	453.064	1147.34	0		0.0363428	0.329818	2.96193	1.00915	0.208551	0.968279	1.2303
6670	Regions/em	463.064	1147.34	0		0.0247729	0.509237	2.35545	0.976772	0.173825	1.09921	1.67151
6671	Regions/em	473.064	1147.34	0		0.0354533	0.396389	2.7857	1.05269	0.193603	1.01281	1.65083
6672	Regions/em	483.064	1147.34	0		0.0524471	0.367411	3.80726	0.923659	0.175653	0.83677	1.36947
6673	Regions/em	493.064	1147.34	0		0.0423603	0.40149	3.29773	0.983243	0.207717	0.865885	1.54074
6674	Regions/em	503.064	1147.34	0		0.0464719	0.354083	2.71927	1.17829	0.213427	0.797407	1.33644
6675	Regions/em	513.064	1147.34	0		0.0495484	0.437399	4.18365	1.13975	0.233299	0.668586	1.67748
6676	Regions/em	523.064	1147.34	0		0.0576804	0.327792	3.35417	0.842823	0.270607	0.628883	1.36105
6677	Regions/em	533.064	1147.34	0		0.045574	0.408844	3.33753	1.09368	0.272267	0.589842	1.50945
6678	Regions/em	543.064	1147.34	0		0.0388823	0.448548	3.39582	1.01229	0.329692	0.668742	1.56544
6679	Regions/em	553.064	1147.34	0		0.0338575	0.419035	3.75482	0.898523	0.425142	0.690645	1.29804
6680	Regions/em	563.064	1147.34	0		0.031904	0.367376	2.53686	1.02918	0.387839	0.732415	0.990857
6681	Regions/em	573.064	1147.34	0		0.0310692	0.272548	3.01937	0.984637	0.46699	0.737833	1.29898
6682	Regions/em	583.064	1147.34	0		0.034231	0.314746	3.57886	1.13202	0.454088	0.630172	1.0793
6683	Regions/em	593.064	1147.34	0		0.0303282	0.318976	3.10372	0.915382	0.515691	0.606036	1.1161
6684	Regions/em	603.064	1147.34	0		0.0341718	0.280521	2.96482	0.942436	0.436802	1.06003	1.24316
6685	Regions/em	613.064	1147.34	0		0.0381572	0.367017	2.30762	1.06088	0.511172	0.846877	1.18776
6686	Regions/em	623.064	1147.34	0		0.0490558	0.293768	3.20159	0.982327	0.456902	0.968423	1.16606
6687	Regions/em	633.064	1147.34	0		0.0372923	0.365452	2.40138	0.967865	0.492847	1.09642	1.27244
6688	Regions/em	643.064	1147.34	0		0.0375379	0.343424	2.68857	0.988427	0.434049	1.05644	1.17027
6689	Regions/em	653.064	1147.34	0		0.0297289	0.380439	2.60018	0.889383	0.543261	1.16389	1.65719
6690	Regions/em	663.064	1147.34	0		0.0310195	0.370729	2.71694	0.811246	0.605233	0.958597	1.09238
6691	Regions/em	673.064	1147.34	0		0.0380001	0.355827	2.48715	0.994838	0.464091	1.20395	1.50296
6692	Regions/em	683.064	1147.34	0		0.0352996	0.328875	2.66609	0.938366	0.602808	0.98185	1.25739
6693	Regions/em	693.064	1147.34	0		0.0486831	0.33202	2.46956	0.841246	0.592611	0.84831	1.20882
6694	Regions/em	703.064	1147.34	0		0.0474909	0.359104	2.82575	1.0065	0.539003	0.807103	1.22561
6695	Regions/em	713.064	1147.34	0		0.033004	0.338854	3.24723	0.848	0.466285	0.80999	1.10914
6696	Regions/em	723.064	1147.34	0		0.0472352	0.445881	2.17017	0.933	0.435587	1.24177	1.12029
6697	Regions/em	733.064	1147.34	0		0.0421903	0.381495	2.17607	0.788066	0.527743	0.796052	0.95673
6698	Regions/em	743.064	1147.34	0		0.0321967	0.379889	2.26128	0.980807	0.523353	0.849088	1.05785
6699	Regions/em	753.064	1147.34	0		0.0406934	0.409322	2.25068	0.965783	0.396958	0.733514	0.944051
6700	Regions/em	763.064	1147.34	0		0.0279963	0.543195	1.8722	0.921333	0.428875	0.800835	1.21975
6701	Regions/em	773.064	1147.34	0		0.0284866	0.44136	2.09921	0.881752	0.68282	0.802482	1.39919
6702	Regions/em	783.064	1147.34	0		0.0317746	0.53526	2.07237	0.705398	0.561658	0.692603	1.32395
6703	Regions/em	793.064	1147.34	0		0.0248749	0.628757	1.50149	0.655362	0.766743	0.688833	2.38711
6704	Regions/em	803.064	1147.34	0		0.0346882	0.401203	2.13226	0.943	0.561511	0.773581	1.40688
6705	Regions/em	813.064	1147.34	0		0.0361601	0.48846	2.68588	0.861168	0.432299	0.937723	1.43845
6706	Regions/em	823.064	1147.34	0		0.0413843	0.523342	2.0038	0.776228	0.674575	0.629828	1.06704
6707	Regions/em	833.064	1147.34	0		0.0443225	0.446541	2.01131	0.904	0.656362	0.684967	1.13643
6708	Regions/em	843.064	1147.34	0		0.0450684	0.439769	1.97889	0.787565	0.708272	0.874776	1.26118
6709	Regions/em	853.064	1147.34	0		0.0456611	0.449928	2.19242	0.811445	0.8601	0.666247	1.00176
6710	Regions/em	863.064	1147.34	0		0.0409382	0.453821	2.05966	0.806937	0.603691	0.885766	1.37207
6711	Regions/em	873.064	1147.34	0		0.0255475	0.523477	1.9666	0.828975	0.863478	0.682915	1.18917
6712	Regions/em	883.064	1147.34	0		0.0415786	0.483959	1.88454	0.829	0.63181	0.630194	0.890135
6713	Regions/em	893.064	1147.34	0		0.038661	0.618772	1.30796	0.635	0.978022	0.385273	0.879714
6714	Regions/em	903.064	1147.34	0		0.0265409	0.464313	1.7181	0.881	0.788077	0.51859	1.57923
6715	Regions/em	913.064	1147.34	0		0.0321469	0.765921	1.8043	0.731807	1.00062	0.502988	1.51052
6716	Regions/em	923.064	1147.34	0		0.0417605	0.683025	1.37197	0.697277	0.944464	0.48325	1.98908
6717	Regions/em	933.064	1147.34	0		0.0341535	0.857213	1.21293	0.71374	1.04025	0.394046	1.55235
6718	Regions/em	943.064	1147.34	0		0.0304519	0.789925	1.52243	0.75803	0.915195	0.411338	1.241
6719	Regions/em	953.064	1147.34	0		0.0378545	0.681126	1.57628	0.618311	1.11423	0.361386	1.14742
6720	Regions/em	963.064	1147.34	0		0.0425544	0.563273	1.73964	0.855	0.694213	0.598206	1.5141
6721	Regions/em	973.064	1147.34	0		0.0353956	0.538633	2.18127	0.692176	0.947939	0.446104	1.18313
6722	Regions/em	983.064	1147.34	0		0.0279244	0.582774	2.01105	0.839863	0.751689	0.593927	1.84993
6723	Regions/em	993.064	1147.34	0		0.0443631	0.537175	1.66926	0.698906	0.938312	0.668854	1.41598
6724	Regions/em	1003.06	1147.34	0		0.0342223	0.656452	1.52787	0.819149	0.899941	0.576462	1.43725
6725	Regions/em	1013.06	1147.34	0		0.0338063	0.457409	2.34678	0.779284	0.790002	0.614308	1.98373
6726	Regions/em	1023.06	1147.34	0		0.0422521	0.532173	1.89793	0.719333	0.870958	0.59682	1.39209
6727	Regions/em	1033.06	1147.34	0		0.0547742	0.635622	1.77712	0.659221	0.934174	0.559561	1.15658
6728	Regions/em	1043.06	1147.34	0		0.0502367	0.600985	1.54605	0.659615	1.14456	0.506736	1.21755
6729	Regions/em	1053.06	1147.34	0		0.0365653	0.686791	1.44764	0.756139	1.06169	0.468678	1.40485
6730	Regions/em	1063.06	1147.34	0		0.0371801	0.778575	1.25971	0.701113	1.21612	0.509738	1.95574
6731	Regions/em	1073.06	1147.34	0		0.0401136	0.643353	1.43868	0.721957	0.902094	0.524064	1.46176
6732	Regions/em	1083.06	1147.34	0		0.0311343	0.781374	1.94666	0.70644	1.03614	0.433439	1.41748
6733	Regions/em	1093.06	1147.34	0		0.0392772	0.671114	1.72326	0.700051	1.01898	0.474943	1.9212
6734	Regions/em	1103.06	1147.34	0		0.0328466	0.575838	1.72516	0.735846	0.819662	0.482283	1.55673
6735	Regions/em	1113.06	1147.34	0		0.0310984	0.588272	1.75307	0.816833	0.815715	0.474606	1.25039
6736	Regions/em	1123.06	1147.34	0		0.0288995	0.483903	2.3173	0.893441	0.720692	0.6534	1.55342
6737	Regions/em	1133.06	1147.34	0		0.0309837	0.555176	1.95192	0.909958	0.686021	0.555296	1.47076
6738	Regions/em	1143.06	1147.34	0		0.0446126	0.350211	2.7327	0.828472	0.554919	0.694277	1.16495
6739	Regions/em	1153.06	1147.34	0		0.0483762	0.455236	2.73927	0.938787	0.572668	0.680056	1.18801
6740	Regions/em	1163.06	1147.34	0		0.0289929	0.477504	2.19519	0.9	0.620612	0.559511	1.46223
6741	Regions/em	1173.06	1147.34	0		0.0419491	0.512924	2.87632	0.845108	0.490737	0.81708	1.37907
6742	Regions/em	1183.06	1147.34	0		0.0285656	0.476638	2.48456	0.965987	0.474587	0.67368	1.2425
6743	Regions/em	1193.06	1147.34	0		0.0364831	0.410474	3.06901	0.876667	0.558446	0.553913	1.12437
6744	Regions/em	1203.06	1147.34	0		0.0382536	0.480289	2.95241	1.01094	0.65018	0.506327	1.18466
6745	Regions/em	1213.06	1147.34	0		0.044928	0.439706	2.97581	0.720166	0.775369	0.458906	1.28558
6746	Regions/em	1223.06	1147.34	0		0.0522164	0.497591	3.06571	0.640062	0.954549	0.337537	1.2937
6747	Regions/em	1233.06	1147.34	0		0.0565346	0.49757	2.76733	0.552148	0.869595	0.403289	1.21101
6748	Regions/em	1243.06	1147.34	0		0.0317066	0.608338	2.5728	0.626397	0.737928	0.440135	1.33827
6749	Regions/em	1253.06	1147.34	0		0.0387324	0.500991	3.35837	0.607262	0.893736	0.44538	1.95429
6750	Regions/em	1263.06	1147.34	0		0.0367526	0.6125	3.01598	0.632334	0.818083	0.432221	1.61886
6751	Regions/em	1273.06	1147.34	0		0.0376148	0.599108	3.10716	0.784352	0.84341	0.418929	1.1717
6752	Regions/em	1283.06	1147.34	0		0.0296852	0.508709	2.78384	0.640484	0.791075	0.482523	2.17167
6753	Regions/em	1293.06	1147.34	0		0.0380346	0.496996	2.77722	0.526115	1.06385	0.370076	1.54795
6754	Regions/em	1303.06	1147.34	0		0.0407763	0.457905	2.90427	0.7705	0.565879	0.578426	1.37357
6755	Regions/em	1313.06	1147.34	0		0.0471449	0.383198	3.39101	0.960786	0.50313	0.519347	1.40986
6756	Regions/em	1323.06	1147.34	0		0.0436029	0.455396	4.21129	0.833992	0.3569	0.606753	1.52012
6757	Regions/em	1333.06	1147.34	0		0.0404583	0.493266	3.76271	0.971744	0.348231	0.462078	1.17457
6758	Regions/em	1343.06	1147.34	0		0.0419422	0.397565	3.16717	0.971764	0.292018	0.604773	1.90299
6759	Regions/em	1353.06	1147.34	0		0.0503583	0.388001	2.68236	0.953439	0.228015	0.844257	1.51406
6760	Regions/em	1363.06	1147.34	0		0.0548701	0.45552	3.16512	1.0709	0.211076	0.833167	1.7377
6761	Regions/em	1373.06	1147.34	0		0.0534869	0.412836	2.76618	0.959189	0.219898	0.776352	1.52442
6762	Regions/em	1383.06	1147.34	0		0.0657321	0.336018	3.44465	0.970468	0.216321	0.779787	1.3398
6763	Regions/em	1393.06	1147.34	0		0.0647969	0.365319	3.51854	0.970955	0.226712	0.801998	1.45097
6764	Regions/em	1403.06	1147.34	0		0.0571853	0.363973	3.06993	1.03212	0.251405	0.665848	1.26602
6765	Regions/em	1413.06	1147.34	0		0.0558397	0.440423	3.5616	0.994	0.22256	0.72796	1.13615
6766	Regions/em	1423.06	1147.34	0		0.0416133	0.383815	2.99066	1.05804	0.221207	0.808662	1.44784
6767	Regions/em	1433.06	1147.34	0		0.0548288	0.398064	3.45136	0.968763	0.215988	0.931783	1.33485
6768	Regions/em	1443.06	1147.34	0		0.0532993	0.37972	3.1601	1.06552	0.208275	0.852441	1.27841
6769	Regions/em	1453.06	1147.34	0		0.0521827	0.449272	3.48245	1.2279	0.181151	0.883479	1.42191
6770	Regions/em	1463.06	1147.34	0		0.0540998	0.381185	3.48038	1.1847	0.16085	0.798659	1.27036
6771	Regions/em	1473.06	1147.34	0		0.0489339	0.372871	2.73533	1.22042	0.150606	0.888745	1.24934
6875	Regions/em	443.064	1137.34	0		0.046867	0.346851	3.14141	1.03429	0.200157	0.984645	1.41391
6876	Regions/em	453.064	1137.34	0		0.0227484	0.441199	2.87252	1.11905	0.195908	0.893023	1.16592
6877	Regions/em	463.064	1137.34	0		0.0305491	0.340135	3.13111	1.14817	0.199815	1.05643	1.44936
6878	Regions/em	473.064	1137.34	0		0.0473871	0.366057	3.01164	1.00583	0.257495	0.639025	1.3017
6879	Regions/em	483.064	1137.34	0		0.0507073	0.357244	2.70271	1.02458	0.210631	0.921407	1.55579
6880	Regions/em	493.064	1137.34	0		0.0465118	0.373001	3.39954	0.891166	0.26541	0.642409	1.57539
6881	Regions/em	503.064	1137.34	0		0.0438151	0.392354	3.09062	1.0403	0.245987	0.632096	1.09791
6882	Regions/em	513.064	1137.34	0		0.0581634	0.357454	4.06195	0.837323	0.263028	0.601858	1.2309
6883	Regions/em	523.064	1137.34	0		0.0507526	0.536281	2.91543	0.895304	0.304962	0.487781	1.34085
6884	Regions/em	533.064	1137.34	0		0.061358	0.434451	3.37919	0.856622	0.319086	0.524147	1.20595
6885	Regions/em	543.064	1137.34	0		0.0496635	0.450821	3.13734	0.901248	0.373948	0.523661	1.17771
6886	Regions/em	553.064	1137.34	0		0.0310779	0.344634	2.76492	1.00405	0.397065	0.696219	1.33544
6887	Regions/em	563.064	1137.34	0		0.0389733	0.364459	3.14095	0.708788	0.512653	0.70308	1.00923
6888	Regions/em	573.064	1137.34	0		0.0348488	0.428126	2.3056	1.10437	0.39716	0.652695	0.947614
6889	Regions/em	583.064	1137.34	0		0.0357515	0.310097	3.09347	0.914346	0.433392	0.633017	0.973315
6890	Regions/em	593.064	1137.34	0		0.0290828	0.342173	3.29229	0.961	0.434796	0.903322	1.02834
6891	Regions/em	603.064	1137.34	0		0.0402977	0.294129	2.62835	0.897823	0.477779	0.934499	1.21209
6892	Regions/em	613.064	1137.34	0		0.0394054	0.325323	2.75486	1.00695	0.541834	0.943757	1.10214
6893	Regions/em	623.064	1137.34	0		0.0350948	0.306655	2.89748	1.02542	0.513435	0.869759	1.09577
6894	Regions/em	633.064	1137.34	0		0.0289035	0.30977	3.17312	0.995952	0.429577	1.00623	1.05738
6895	Regions/em	643.064	1137.34	0		0.0366645	0.319391	2.37563	1.0262	0.435234	0.985287	1.06537
6896	Regions/em	653.064	1137.34	0		0.0410763	0.280549	2.87186	1.01368	0.406617	0.949909	0.916523
6897	Regions/em	663.064	1137.34	0		0.0360501	0.299957	3.16497	1.03149	0.389699	0.99045	1.26361
6898	Regions/em	673.064	1137.34	0		0.0335455	0.341114	2.79458	0.779538	0.503105	0.979331	1.05877
6899	Regions/em	683.064	1137.34	0		0.0410853	0.372826	2.22809	0.878963	0.651305	0.772238	1.18045
6900	Regions/em	693.064	1137.34	0		0.0323734	0.337984	2.61562	0.907642	0.565036	1.09206	1.1478
6901	Regions/em	703.064	1137.34	0		0.0367439	0.477068	2.1656	0.961668	0.623975	1.02722	1.33932
6902	Regions/em	713.064	1137.34	0		0.0287522	0.365323	2.16149	0.927821	0.663327	0.75725	1.26078
6903	Regions/em	723.064	1137.34	0		0.0461198	0.334572	2.17516	0.925	0.547093	0.881381	1.19357
6904	Regions/em	733.064	1137.34	0		0.043289	0.402485	1.93802	0.818539	0.593495	0.925706	1.34825
6905	Regions/em	743.064	1137.34	0		0.0347767	0.335064	2.37731	0.842	0.627902	0.706942	1.07937
6906	Regions/em	753.064	1137.34	0		0.039637	0.444925	2.08113	0.910614	0.810653	0.630497	1.21417
6907	Regions/em	763.064	1137.34	0		0.0350551	0.469412	1.93222	0.840592	0.79744	0.66739	1.36943
6908	Regions/em	773.064	1137.34	0		0.0269667	0.536702	1.86107	0.754	0.881643	0.602204	1.16494
6909	Regions/em	783.064	1137.34	0		0.0381685	0.62921	1.62063	0.773203	1.0359	0.516895	1.59945
6910	Regions/em	793.064	1137.34	0		0.034472	0.650189	1.51444	0.553392	1.56117	0.425333	2.52458
6911	Regions/em	803.064	1137.34	0		0.0303357	0.514314	1.77911	0.659164	0.748418	0.569135	1.45243
6912	Regions/em	813.064	1137.34	0		0.0231019	0.489704	1.70878	0.793895	1.23253	0.419182	2.04258
6913	Regions/em	823.064	1137.34	0		0.0353593	0.719891	1.60293	0.714086	1.16114	0.490604	1.7554
6914	Regions/em	833.064	1137.34	0		0.0472339	0.550694	2.09139	0.701473	0.877487	0.603673	1.89492
6915	Regions/em	843.064	1137.34	0		0.0385907	0.516736	1.92329	0.799794	0.809636	0.55762	1.32529
6916	Regions/em	853.064	1137.34	0		0.0411303	0.486224	1.78497	1.00638	1.0163	0.566163	1.27807
6917	Regions/em	863.064	1137.34	0		0.0442176	0.457546	1.81965	0.765367	0.804031	0.589468	1.16622
6918	Regions/em	873.064	1137.34	0		0.0369396	0.542551	1.84688	0.819831	0.903481	0.558084	1.26222
6919	Regions/em	883.064	1137.34	0		0.0416397	0.682805	1.67716	0.692591	1.07458	0.383589	1.1278
6920	Regions/em	893.064	1137.34	0		0.0328309	0.61917	1.41027	0.669674	0.968355	0.541779	1.607
6921	Regions/em	903.064	1137.34	0		0.0359065	0.55532	1.86179	0.810748	0.890093	0.455427	1.67079
6922	Regions/em	913.064	1137.34	0		0.0297917	0.754572	1.38111	0.79004	1.00335	0.361125	1.30519
6923	Regions/em	923.064	1137.34	0		0.0362148	0.815581	1.18656	0.574146	0.936401	0.452084	1.8199
6924	Regions/em	933.064	1137.34	0		0.0410035	0.716999	1.47196	0.584408	1.14184	0.433752	1.99458
6925	Regions/em	943.064	1137.34	0		0.0269252	0.775235	1.20134	0.581	1.30249	0.336669	1.2908
6926	Regions/em	953.064	1137.34	0		0.0354342	0.854527	1.13499	0.635731	0.94019	0.471842	1.76762
6927	Regions/em	963.064	1137.34	0		0.0338901	0.713572	1.34625	0.650059	1.05017	0.404141	1.37421
6928	Regions/em	973.064	1137.34	0		0.0425853	0.636163	1.37871	0.563506	1.41376	0.383919	1.52545
6929	Regions/em	983.064	1137.34	0		0.0325419	0.704236	1.24243	0.621714	1.01528	0.455854	1.7202
6930	Regions/em	993.064	1137.34	0		0.0305367	0.821081	1.24511	0.552581	0.951116	0.454763	1.76167
6931	Regions/em	1003.06	1137.34	0		0.0332963	0.839886	1.53983	0.743	1.09956	0.422093	1.4206
6932	Regions/em	1013.06	1137.34	0		0.0305457	0.68366	1.10908	0.686122	0.91036	0.431631	1.58616
6933	Regions/em	1023.06	1137.34	0		0.0575544	0.689521	1.45903	0.56992	1.10146	0.465324	1.44052
6934	Regions/em	1033.06	1137.34	0		0.0397884	0.656145	1.31971	0.665448	1.13237	0.461663	1.5002
6935	Regions/em	1043.06	1137.34	0		0.0353408	0.729688	1.23542	0.732448	1.16422	0.44449	1.41684
6936	Regions/em	1053.06	1137.34	0		0.0422404	0.712321	1.45294	0.584	0.965619	0.511313	1.66987
6937	Regions/em	1063.06	1137.34	0		0.0432896	0.833813	1.28748	0.679439	1.06944	0.425244	2.21689
6938	Regions/em	1073.06	1137.34	0		0.0400204	0.89278	1.10579	0.614171	1.0077	0.589161	1.82448
6939	Regions/em	1083.06	1137.34	0		0.0437893	0.792458	1.29572	0.678832	1.10119	0.58575	1.87049
6940	Regions/em	1093.06	1137.34	0		0.0461285	0.675106	1.45976	0.678488	0.938336	0.434783	1.50258
6941	Regions/em	1103.06	1137.34	0		0.0368832	0.702764	1.34764	0.692348	1.14255	0.44461	1.68454
6942	Regions/em	1113.06	1137.34	0		0.0311028	0.713492	1.55194	0.683553	0.829831	0.5195	1.49853
6943	Regions/em	1123.06	1137.34	0		0.0351302	0.494039	2.21042	0.734334	0.75906	0.599319	1.46719
6944	Regions/em	1133.06	1137.34	0		0.0474454	0.48192	2.33891	1.05396	0.733559	0.683264	1.16198
6945	Regions/em	1143.06	1137.34	0		0.0519212	0.449607	2.42393	0.955314	0.633242	0.673489	1.21712
6946	Regions/em	1153.06	1137.34	0		0.0523944	0.481877	2.63993	0.985345	0.633689	0.695468	1.48036
6947	Regions/em	1163.06	1137.34	0		0.0363407	0.469476	2.20985	1.01237	0.603432	0.571733	1.0427
6948	Regions/em	1173.06	1137.34	0		0.0482666	0.375778	2.75464	0.935987	0.553577	0.6279	1.13537
6949	Regions/em	1183.06	1137.34	0		0.0306953	0.468364	2.84361	0.975804	0.524224	0.702118	1.43993
6950	Regions/em	1193.06	1137.34	0		0.0378156	0.478849	2.35359	1.00427	0.669754	0.584778	1.2684
6951	Regions/em	1203.06	1137.34	0		0.0276141	0.447618	2.99671	0.870528	0.648466	0.64639	1.48828
6952	Regions/em	1213.06	1137.34	0		0.0485333	0.388716	3.28599	0.892289	0.797203	0.467411	1.21631
6953	Regions/em	1223.06	1137.34	0		0.0482759	0.415022	3.39184	0.810352	0.798605	0.455854	1.30974
6954	Regions/em	1233.06	1137.34	0		0.048295	0.444633	2.55155	0.721205	0.863402	0.45965	1.38483
6955	Regions/em	1243.06	1137.34	0		0.040821	0.50164	3.07654	0.680444	0.783273	0.503078	1.35043
6956	Regions/em	1253.06	1137.34	0		0.04121	0.50805	3.01965	0.650323	0.895825	0.473573	1.38823
6957	Regions/em	1263.06	1137.34	0		0.0539504	0.445875	3.3585	0.589254	0.828539	0.452864	1.44489
6958	Regions/em	1273.06	1137.34	0		0.0439056	0.608508	2.96686	0.597953	0.807004	0.458521	1.3053
6959	Regions/em	1283.06	1137.34	0		0.0391624	0.606867	3.16003	0.554313	0.872009	0.475071	1.4798
6960	Regions/em	1293.06	1137.34	0		0.0366351	0.435104	2.78436	0.735844	0.814942	0.526261	1.81759
6961	Regions/em	1303.06	1137.34	0		0.0363074	0.412963	3.06893	0.811373	0.680235	0.580039	1.56238
6962	Regions/em	1313.06	1137.34	0		0.0505261	0.403751	2.93451	0.837	0.455752	0.538238	1.30953
6963	Regions/em	1323.06	1137.34	0		0.043149	0.410434	3.94463	0.81204	0.374724	0.516356	1.23468
6964	Regions/em	1333.06	1137.34	0		0.0424928	0.550878	3.34356	0.966312	0.301209	0.643448	1.70052
6965	Regions/em	1343.06	1137.34	0		0.0461775	0.477411	4.39823	1.00178	0.273798	0.624513	1.62264
6966	Regions/em	1353.06	1137.34	0		0.0493198	0.343421	4.01262	0.989888	0.2679	0.584537	1.2277
6967	Regions/em	1363.06	1137.34	0		0.0413338	0.478969	2.89912	1.04638	0.221874	0.611327	1.03702
6968	Regions/em	1373.06	1137.34	0		0.0586559	0.375512	3.44951	1.01492	0.224345	0.729545	1.45568
6969	Regions/em	1383.06	1137.34	0		0.070502	0.457214	3.61178	1.03613	0.191827	0.777682	1.28429
6970	Regions/em	1393.06	1137.34	0		0.0527578	0.40447	3.12954	0.972087	0.205713	0.769263	1.45443
6971	Regions/em	1403.06	1137.34	0		0.0473933	0.460151	2.98933	1.08201	0.194658	0.930623	1.50978
6972	Regions/em	1413.06	1137.34	0		0.0618692	0.364902	2.61145	0.895455	0.20024	0.938636	1.63586
6973	Regions/em	1423.06	1137.34	0		0.050279	0.328563	3.07932	1.11048	0.247525	0.734203	1.30098
6974	Regions/em	1433.06	1137.34	0		0.035312	0.439947	3.30207	1.08	0.260071	0.719064	1.40976
6975	Regions/em	1443.06	1137.34	0		0.0534797	0.423311	2.81598	0.956382	0.209094	0.846766	1.23755
6976	Regions/em	1453.06	1137.34	0		0.05063	0.352668	2.9213	1.16796	0.186676	0.99809	1.33767
6977	Regions/em	1463.06	1137.34	0		0.0481567	0.323947	3.28506	1.10221	0.168518	0.997414	1.6264
6978	Regions/em	1473.06	1137.34	0		0.0551288	0.427074	2.59722	1.13485	0.16208	1.02248	1.57241
6979	Regions/em	1483.06	1137.34	0		0.0711984	0.403369	2.32785	1.26063	0.160437	1.10777	1.08622
7082	Regions/em	443.064	1127.34	0		0.0413153	0.417509	3.39885	0.971056	0.212286	1.01273	1.77854
7083	Regions/em	453.064	1127.34	0		0.0375467	0.438101	4.15172	1.09076	0.217056	0.860479	1.37653
7084	Regions/em	463.064	1127.34	0		0.03657	0.364834	3.05857	1.03453	0.236512	0.776462	1.9088
7085	Regions/em	473.064	1127.34	0		0.0359868	0.485335	2.9918	1.09329	0.239572	0.602419	1.12715
7086	Regions/em	483.064	1127.34	0		0.0513989	0.378164	2.73331	0.872517	0.256498	0.742001	1.57009
7087	Regions/em	493.064	1127.34	0		0.0496606	0.417212	2.52755	0.918183	0.277617	0.603713	1.34967
7088	Regions/em	503.064	1127.34	0		0.0707032	0.32633	3.84479	0.868271	0.310234	0.535048	1.40857
7089	Regions/em	513.064	1127.34	0		0.0706111	0.424039	3.08978	0.888977	0.320335	0.515279	1.33336
7090	Regions/em	523.064	1127.34	0		0.0593095	0.415621	3.66986	0.905116	0.31833	0.500285	1.13735
7091	Regions/em	533.064	1127.34	0		0.0536024	0.495525	4.81354	0.877939	0.348442	0.369167	1.11857
7092	Regions/em	543.064	1127.34	0		0.0489004	0.39354	3.44907	0.949532	0.408868	0.516331	1.36994
7093	Regions/em	553.064	1127.34	0		0.0511317	0.337102	3.13038	0.931224	0.465655	0.444388	0.873955
7094	Regions/em	563.064	1127.34	0		0.0421225	0.37537	3.02733	0.887609	0.443438	0.686129	1.10056
7095	Regions/em	573.064	1127.34	0		0.0337595	0.277592	2.7996	1.22069	0.404528	0.902209	1.26447
7096	Regions/em	583.064	1127.34	0		0.0480707	0.314099	3.31226	0.941	0.284708	0.929193	1.17674
7097	Regions/em	593.064	1127.34	0		0.0275161	0.313904	3.14329	0.967136	0.344192	0.908264	1.0205
7098	Regions/em	603.064	1127.34	0		0.035126	0.352201	2.73103	1.06573	0.422439	0.96016	1.01754
7099	Regions/em	613.064	1127.34	0		0.0293699	0.194658	2.67277	0.956	0.461363	0.743558	1.21752
7100	Regions/em	623.064	1127.34	0		0.0283948	0.344077	2.41884	1.00153	0.563865	0.753088	0.996252
7101	Regions/em	633.064	1127.34	0		0.0375981	0.373826	2.55045	1.05458	0.600355	0.700634	1.00617
7102	Regions/em	643.064	1127.34	0		0.0257181	0.264372	3.16633	1.00181	0.438045	1.11022	1.6773
7103	Regions/em	653.064	1127.34	0		0.0316539	0.302858	2.43218	1.09922	0.572066	0.915967	0.996383
7104	Regions/em	663.064	1127.34	0		0.0401891	0.328502	2.47686	0.76206	0.547589	0.957177	1.39775
7105	Regions/em	673.064	1127.34	0		0.0254931	0.429192	2.20036	0.944649	0.559209	0.966558	1.61684
7106	Regions/em	683.064	1127.34	0		0.0324127	0.355037	2.73413	0.982768	0.621654	0.814035	1.32893
7107	Regions/em	693.064	1127.34	0		0.0331406	0.410699	2.3208	0.947684	0.701853	0.853482	1.51693
7108	Regions/em	703.064	1127.34	0		0.0458778	0.389498	2.30513	0.886965	0.563434	0.909481	1.42407
7109	Regions/em	713.064	1127.34	0		0.0407065	0.312012	2.09286	0.863472	0.672479	0.803055	1.33249
7110	Regions/em	723.064	1127.34	0		0.0493298	0.469685	2.00664	0.862035	0.794033	0.626434	1.15231
7111	Regions/em	733.064	1127.34	0		0.0380376	0.403393	2.06419	0.823178	0.839322	0.570812	1.06676
7112	Regions/em	743.064	1127.34	0		0.0261448	0.553908	1.78981	0.784981	1.02195	0.525853	1.28412
7113	Regions/em	753.064	1127.34	0		0.0363194	0.577174	1.51338	0.647641	1.02873	0.508673	1.61535
7114	Regions/em	763.064	1127.34	0		0.0468285	0.574137	1.4807	0.641793	1.11321	0.545704	1.88478
7115	Regions/em	773.064	1127.34	0		0.0398383	0.566238	1.53235	0.757073	1.08728	0.51183	1.42913
7116	Regions/em	783.064	1127.34	0		0.033016	0.555916	1.57838	0.595996	0.851196	0.464715	1.43894
7117	Regions/em	793.064	1127.34	0		0.0167823	0.718496	1.34235	0.605828	1.3608	0.391027	124.602
7118	Regions/em	803.064	1127.34	0		0.0398154	0.610429	1.37905	0.685318	0.82644	0.48404	1.49767
7119	Regions/em	813.064	1127.34	0		0.0344733	0.649991	1.6799	0.71023	1.06323	0.420692	1.36474
7120	Regions/em	823.064	1127.34	0		0.0270318	0.826538	1.20397	0.735522	1.21791	0.400006	1.50618
7121	Regions/em	833.064	1127.34	0		0.0447116	0.736409	1.40777	0.687508	1.0925	0.464641	2.09902
7122	Regions/em	843.064	1127.34	0		0.0297254	0.508515	1.96535	0.669267	0.765045	0.453005	1.24108
7123	Regions/em	853.064	1127.34	0		0.0335159	0.615744	2.00484	0.700822	0.894381	0.472045	1.04824
7124	Regions/em	863.064	1127.34	0		0.0338542	0.608605	1.59161	0.741786	1.00839	0.509785	1.4784
7125	Regions/em	873.064	1127.34	0		0.0295571	0.645533	1.38215	0.766694	1.16027	0.478078	1.58709
7126	Regions/em	883.064	1127.34	0		0.0307387	0.537694	1.59843	0.667	0.870371	0.485326	1.47792
7127	Regions/em	893.064	1127.34	0		0.0313928	0.682873	1.46327	0.706241	1.11449	0.433223	1.6088
7128	Regions/em	903.064	1127.34	0		0.0285724	1.01958	0.998808	0.696966	1.0041	0.353587	1.29285
7129	Regions/em	913.064	1127.34	0		0.0277648	0.699915	1.23914	0.589293	1.03124	0.281151	1.19964
7130	Regions/em	923.064	1127.34	0		0.0317028	0.975181	0.954657	0.481438	1.16561	0.383227	1.99033
7131	Regions/em	933.064	1127.34	0		0.0317008	0.783949	1.18587	0.528413	1.01494	0.494776	1.61976
7132	Regions/em	943.064	1127.34	0		0.0381101	0.822665	1.15584	0.510647	1.01565	0.477679	2.1549
7133	Regions/em	953.064	1127.34	0		0.0360636	0.799748	1.21929	0.597309	0.874096	0.360299	1.1497
7134	Regions/em	963.064	1127.34	0		0.0332264	1.00907	0.926902	0.536	1.22371	0.381701	1.79241
7135	Regions/em	973.064	1127.34	0		0.0456123	0.875419	1.23181	0.546108	1.05297	0.298485	1.09369
7136	Regions/em	983.064	1127.34	0		0.0371121	0.703363	1.55938	0.510788	1.02792	0.338889	1.50754
7137	Regions/em	993.064	1127.34	0		0.0306353	0.662596	1.34337	0.602436	1.06188	0.480601	1.50866
7138	Regions/em	1003.06	1127.34	0		0.0501686	0.810958	1.18691	0.60116	1.27598	0.435773	1.90959
7139	Regions/em	1013.06	1127.34	0		0.0479201	0.828973	1.14353	0.670637	1.13027	0.355379	1.37458
7140	Regions/em	1023.06	1127.34	0		0.038907	0.678832	1.26535	0.633492	0.980329	0.444525	1.3205
7141	Regions/em	1033.06	1127.34	0		0.0295103	0.834716	1.18452	0.756059	0.971721	0.414289	1.20441
7142	Regions/em	1043.06	1127.34	0		0.030374	0.911625	1.34943	0.559947	1.17082	0.349037	1.26347
7143	Regions/em	1053.06	1127.34	0		0.0276304	0.924045	1.14338	0.557358	1.42956	0.421343	1.75442
7144	Regions/em	1063.06	1127.34	0		0.0290828	0.862488	1.28575	0.473	1.14255	0.477059	1.9516
7145	Regions/em	1073.06	1127.34	0		0.0310542	0.889234	1.14866	0.583226	1.17313	0.504298	1.56055
7146	Regions/em	1083.06	1127.34	0		0.0332083	0.882967	1.35861	0.691886	1.01823	0.441868	1.82731
7147	Regions/em	1093.06	1127.34	0		0.029254	0.594474	1.99527	0.729742	0.702696	0.556569	1.53489
7148	Regions/em	1103.06	1127.34	0		0.0404631	0.700415	1.54064	0.714	0.988729	0.431107	1.14639
7149	Regions/em	1113.06	1127.34	0		0.0299794	0.61059	1.7051	0.683333	0.795915	0.518277	1.57823
7150	Regions/em	1123.06	1127.34	0		0.0326306	0.618677	1.37539	0.726	0.640439	0.531321	1.90772
7151	Regions/em	1133.06	1127.34	0		0.0377697	0.729052	1.71136	0.594008	0.801338	0.612533	1.88763
7152	Regions/em	1143.06	1127.34	0		0.044411	0.535932	1.82433	0.825228	0.960967	0.499861	1.10231
7153	Regions/em	1153.06	1127.34	0		0.0410104	0.597747	1.87721	0.794593	0.839781	0.670398	1.61381
7154	Regions/em	1163.06	1127.34	0		0.0704969	0.526795	1.95271	0.8053	0.882069	0.646427	1.35632
7155	Regions/em	1173.06	1127.34	0		0.0408033	0.509154	2.08804	0.854358	0.731868	0.637028	1.53995
7156	Regions/em	1183.06	1127.34	0		0.038833	0.464299	2.04851	1.01789	0.590709	0.76633	1.61927
7157	Regions/em	1193.06	1127.34	0		0.0350539	0.494093	2.28079	0.816971	0.759578	0.681484	1.48099
7158	Regions/em	1203.06	1127.34	0		0.0385502	0.454494	2.28533	0.890459	0.733988	0.501212	1.05363
7159	Regions/em	1213.06	1127.34	0		0.0455155	0.414936	2.93706	0.902281	0.66634	0.578016	1.38381
7160	Regions/em	1223.06	1127.34	0		0.0395878	0.426755	2.72632	0.974185	0.828714	0.458638	1.1787
7161	Regions/em	1233.06	1127.34	0		0.0384445	0.428557	2.74133	0.833517	0.750304	0.497612	1.0978
7162	Regions/em	1243.06	1127.34	0		0.0470588	0.391359	2.69994	0.756284	0.953551	0.358679	0.846597
7163	Regions/em	1253.06	1127.34	0		0.0430692	0.477704	2.38338	0.707744	0.793418	0.545978	1.67317
7164	Regions/em	1263.06	1127.34	0		0.0460325	0.424441	3.11631	0.751075	0.844467	0.535102	1.56065
7165	Regions/em	1273.06	1127.34	0		0.0403263	0.404293	2.95219	0.688893	0.685083	0.573751	1.50374
7166	Regions/em	1283.06	1127.34	0		0.0359771	0.438734	2.59389	0.748483	0.734244	0.511732	1.64821
7167	Regions/em	1293.06	1127.34	0		0.0419689	0.341974	2.0404	0.765837	0.699528	0.572062	1.32712
7168	Regions/em	1303.06	1127.34	0		0.037598	0.375198	2.73886	0.814719	0.586785	0.559328	1.09159
7169	Regions/em	1313.06	1127.34	0		0.0466456	0.505844	2.81068	0.86039	0.39062	0.538055	1.05481
7170	Regions/em	1323.06	1127.34	0		0.0533737	0.470306	3.37713	0.814335	0.328159	0.552365	1.34575
7171	Regions/em	1333.06	1127.34	0		0.0638106	0.503467	3.92134	0.867719	0.309468	0.679407	1.43102
7172	Regions/em	1343.06	1127.34	0		0.0512031	0.544048	3.05429	0.98431	0.258402	0.693204	1.57245
7173	Regions/em	1353.06	1127.34	0		0.0598671	0.438797	3.33797	0.940884	0.262968	0.594205	1.15128
7174	Regions/em	1363.06	1127.34	0		0.0567351	0.434199	3.47044	0.98791	0.214331	0.614705	1.33893
7175	Regions/em	1373.06	1127.34	0		0.0724984	0.465885	3.45181	0.904072	0.193252	0.775686	1.58785
7176	Regions/em	1383.06	1127.34	0		0.0553973	0.458108	3.95322	0.928123	0.205872	0.82161	1.21106
7177	Regions/em	1393.06	1127.34	0		0.0621734	0.479589	3.51299	1.01481	0.195797	0.775612	1.34719
7178	Regions/em	1403.06	1127.34	0		0.0662187	0.376416	3.55636	0.949658	0.186254	0.998577	1.38139
7179	Regions/em	1413.06	1127.34	0		0.0580503	0.421881	3.32353	0.942425	0.230374	0.844418	1.30954
7180	Regions/em	1423.06	1127.34	0		0.0618792	0.355348	3.2139	0.996285	0.218658	0.815482	1.38938
7181	Regions/em	1433.06	1127.34	0		0.0531488	0.354869	4.03441	0.974529	0.239511	0.859274	1.41151
7182	Regions/em	1443.06	1127.34	0		0.0420283	0.395657	3.00895	0.977013	0.198453	0.843588	1.44354
7183	Regions/em	1453.06	1127.34	0		0.0474501	0.372807	3.23543	1.10051	0.164288	0.971393	1.55916
7184	Regions/em	1463.06	1127.34	0		0.0412957	0.40394	2.72344	1.27	0.173039	0.896242	1.38327
7185	Regions/em	1473.06	1127.34	0		0.0602197	0.356499	2.82948	1.23156	0.163637	0.94342	1.16278
7186	Regions/em	1483.06	1127.34	0		0.0648102	0.410407	3.0641	1.20692	0.197791	0.816959	1.22543
7187	Regions/em	1493.06	1127.34	0		0.0615157	0.351461	3.56032	1.17697	0.144364	0.956104	1.51234
7188	Regions/em	1503.06	1127.34	0		0.0510215	0.312782	3.41844	1.439	0.1499	1.10755	1.56204
7288	Regions/em	433.064	1117.34	0		0.0426718	0.351336	3.01749	1.06147	0.161183	1.11467	1.79879
7289	Regions/em	443.064	1117.34	0		0.0439101	0.398824	2.84493	1.10578	0.238719	0.74246	1.39888
7290	Regions/em	453.064	1117.34	0		0.0391851	0.404859	4.03539	1.12135	0.224602	0.644526	0.892174
7291	Regions/em	463.064	1117.34	0		0.0438645	0.374568	3.56968	0.98651	0.198046	0.874018	1.25833
7292	Regions/em	473.064	1117.34	0		0.0619731	0.364902	2.93452	1.01635	0.197822	0.694532	1.27625
7293	Regions/em	483.064	1117.34	0		0.0532744	0.348428	2.4452	0.918561	0.278864	0.742088	1.42203
7294	Regions/em	493.064	1117.34	0		0.0619514	0.422196	3.22453	0.822848	0.370374	0.500032	1.26653
7295	Regions/em	503.064	1117.34	0		0.0576825	0.492811	3.35258	0.911295	0.317517	0.443823	1.28724
7296	Regions/em	513.064	1117.34	0		0.0618226	0.408694	4.01797	0.76313	0.285253	0.497441	0.965931
7297	Regions/em	523.064	1117.34	0		0.0477853	0.478841	3.04267	0.78	0.374143	0.370337	1.06976
7298	Regions/em	533.064	1117.34	0		0.0593443	0.43992	3.61881	0.785806	0.396832	0.361608	1.19775
7299	Regions/em	543.064	1117.34	0		0.0530303	0.452238	4.24724	0.910647	0.427926	0.32609	0.823724
7300	Regions/em	553.064	1117.34	0		0.073627	0.341761	3.63706	0.805227	0.437736	0.575719	1.03869
7301	Regions/em	563.064	1117.34	0		0.0545816	0.307678	2.83787	0.840172	0.509372	0.470011	0.959425
7302	Regions/em	573.064	1117.34	0		0.0434741	0.3267	2.59112	0.94943	0.485186	0.687434	0.982143
7303	Regions/em	583.064	1117.34	0		0.0396401	0.326747	2.79712	0.953993	0.528374	0.801264	1.18252
7304	Regions/em	593.064	1117.34	0		0.0376038	0.31185	2.93475	0.946689	0.457001	0.988869	1.11469
7305	Regions/em	603.064	1117.34	0		0.057457	0.274848	3.23624	0.841525	0.510003	0.997661	0.968809
7306	Regions/em	613.064	1117.34	0		0.0341905	0.267487	2.92053	1.0384	0.601201	0.826993	1.2767
7307	Regions/em	623.064	1117.34	0		0.0382157	0.385492	2.85178	0.835407	0.497097	0.852695	1.02296
7308	Regions/em	633.064	1117.34	0		0.0307809	0.317759	2.53465	1.01	0.656485	0.964614	1.3327
7309	Regions/em	643.064	1117.34	0		0.0320024	0.330075	2.91271	0.954442	0.589528	1.00018	1.52368
7310	Regions/em	653.064	1117.34	0		0.0358924	0.379699	2.52877	0.981	0.596815	0.954219	1.29736
7311	Regions/em	663.064	1117.34	0		0.0381821	0.307943	3.22291	1.00551	0.522729	0.979465	1.51278
7312	Regions/em	673.064	1117.34	0		0.0287437	0.382742	2.97008	0.954	0.677316	0.875719	1.81555
7313	Regions/em	683.064	1117.34	0		0.0379252	0.347763	2.19186	0.949	0.638946	0.774492	1.09469
7314	Regions/em	693.064	1117.34	0		0.0468732	0.373724	2.16663	0.843265	0.692759	0.679978	1.31372
7315	Regions/em	703.064	1117.34	0		0.0486306	0.342272	2.35777	0.956169	0.810611	0.617813	1.17591
7316	Regions/em	713.064	1117.34	0		0.0439038	0.397271	2.37992	0.819653	0.818386	0.604084	1.25545
7317	Regions/em	723.064	1117.34	0		0.0377331	0.483731	1.76418	0.818	0.77116	0.688147	1.37061
7318	Regions/em	733.064	1117.34	0		0.0282938	0.491472	2.15072	0.770728	1.01073	0.416282	1.19611
7319	Regions/em	743.064	1117.34	0		0.0267234	0.627843	1.70397	0.688636	1.23917	0.548846	1.74983
7320	Regions/em	753.064	1117.34	0		0.0279435	0.603651	1.57397	0.68085	1.19625	0.447018	1.70008
7321	Regions/em	763.064	1117.34	0		0.0281579	0.541056	1.4905	0.71133	0.898053	0.476952	1.55656
7322	Regions/em	773.064	1117.34	0		0.0302891	0.724088	1.20107	0.587907	1.11274	0.466544	1.22146
7323	Regions/em	783.064	1117.34	0		0.0307419	0.798919	1.15202	0.686225	0.984642	0.461794	1.52154
7324	Regions/em	793.064	1117.34	0		0.0249472	0.695095	1.31608	0.650725	0.906979	0.522706	1.81808
7325	Regions/em	803.064	1117.34	0		0.0239343	0.75288	1.18284	0.630427	0.974536	0.424865	1.5659
7326	Regions/em	813.064	1117.34	0		0.0301232	0.886936	0.966859	0.473578	1.56833	0.458517	2.00456
7327	Regions/em	823.064	1117.34	0		0.033517	0.831843	1.30179	0.497011	1.12748	0.362971	1.57727
7328	Regions/em	833.064	1117.34	0		0.0188189	0.799968	1.27455	0.628227	1.14251	0.458109	1.61927
7329	Regions/em	843.064	1117.34	0		0.0275539	0.57833	1.84334	0.767231	1.08588	0.461383	1.32375
7330	Regions/em	853.064	1117.34	0		0.0350217	0.674555	1.41723	0.538548	1.14695	0.409955	1.58657
7331	Regions/em	863.064	1117.34	0		0.0417839	0.852748	1.09089	0.555324	1.31748	0.404686	1.63192
7332	Regions/em	873.064	1117.34	0		0.0388288	0.805658	1.25059	0.575248	1.21261	0.393263	1.7065
7333	Regions/em	883.064	1117.34	0		0.0352497	0.744924	1.25927	0.504506	1.04165	0.44913	1.53377
7334	Regions/em	893.064	1117.34	0		0.0381436	0.765174	1.33129	0.6038	1.04732	0.540416	1.61817
7335	Regions/em	903.064	1117.34	0		0.0297565	1.03769	1.26972	0.615	0.94158	0.441586	1.51671
7336	Regions/em	913.064	1117.34	0		0.0324266	0.876802	1.35203	0.641453	1.03812	0.395144	1.53467
7337	Regions/em	923.064	1117.34	0		0.0305063	1.12231	1.05688	0.532166	1.19458	0.370773	1.71837
7338	Regions/em	933.064	1117.34	0		0.0446076	1.08337	1.03552	0.466298	1.35989	0.403421	2.35234
7339	Regions/em	943.064	1117.34	0		0.0342671	1.03368	0.923824	0.427181	1.00693	0.461141	1.95057
7340	Regions/em	953.064	1117.34	0		0.041574	1.04357	0.857678	0.508646	1.1616	0.301789	1.81396
7341	Regions/em	963.064	1117.34	0		0.0386105	0.859291	1.08911	0.520407	0.930055	0.406021	1.84703
7342	Regions/em	973.064	1117.34	0		0.0409193	0.890825	1.09238	0.571	0.997443	0.365163	1.22082
7343	Regions/em	983.064	1117.34	0		0.0334122	0.977051	1.51515	0.538189	1.00791	0.504317	1.35062
7344	Regions/em	993.064	1117.34	0		0.0317918	0.878	1.05613	0.556	1.13906	0.465434	1.44034
7345	Regions/em	1003.06	1117.34	0		0.0303203	0.907742	1.22128	0.514092	1.03137	0.54598	1.7361
7346	Regions/em	1013.06	1117.34	0		0.0382233	0.923356	0.994064	0.499056	1.22297	0.38192	1.57629
7347	Regions/em	1023.06	1117.34	0		0.0396806	1.01623	0.95099	0.569	1.07381	0.40639	1.54368
7348	Regions/em	1033.06	1117.34	0		0.0286724	0.908904	1.27336	0.592	1.22782	0.407794	1.7752
7349	Regions/em	1043.06	1117.34	0		0.031994	0.905923	1.13047	0.467614	1.24708	0.386937	1.13282
7350	Regions/em	1053.06	1117.34	0		0.0271346	0.771765	1.34107	0.534	1.11678	0.35283	1.5551
7351	Regions/em	1063.06	1117.34	0		0.0331169	0.946097	1.28736	0.509664	1.22899	0.425548	1.65209
7352	Regions/em	1073.06	1117.34	0		0.0260943	1.08788	1.05996	0.591774	1.08777	0.400019	2.32736
7353	Regions/em	1083.06	1117.34	0		0.0295924	0.995289	1.03727	0.525722	1.29149	0.470766	1.90259
7354	Regions/em	1093.06	1117.34	0		0.0320869	0.829642	1.20968	0.547784	0.936807	0.53102	1.29827
7355	Regions/em	1103.06	1117.34	0		0.0310149	0.696036	1.56182	0.603041	0.795889	0.442042	1.21999
7356	Regions/em	1113.06	1117.34	0		0.0307502	0.81911	1.45042	0.661	0.947305	0.474829	1.52855
7357	Regions/em	1123.06	1117.34	0		0.0326198	0.753988	1.51557	0.707341	0.841285	0.557952	1.43198
7358	Regions/em	1133.06	1117.34	0		0.0454745	0.715348	1.29943	0.592561	0.82877	0.554683	1.08991
7359	Regions/em	1143.06	1117.34	0		0.0467169	0.631153	1.45736	0.670386	0.807091	0.631967	1.54202
7360	Regions/em	1153.06	1117.34	0		0.0407032	0.57874	1.86701	0.698801	0.791962	0.704982	1.63613
7361	Regions/em	1163.06	1117.34	0		0.051749	0.623577	1.66363	0.670963	0.777518	0.664684	1.68553
7362	Regions/em	1173.06	1117.34	0		0.0562195	0.572625	1.50289	0.738171	0.789516	0.643275	1.34853
7363	Regions/em	1183.06	1117.34	0		0.0438035	0.70158	1.69273	0.746731	0.812954	0.615499	1.50637
7364	Regions/em	1193.06	1117.34	0		0.0517034	0.582544	1.46199	0.775326	0.89032	0.579843	1.47831
7365	Regions/em	1203.06	1117.34	0		0.0529456	0.618149	1.72028	0.698129	0.88145	0.488626	1.82883
7366	Regions/em	1213.06	1117.34	0		0.0471471	0.492048	1.93806	0.804097	0.974365	0.491494	1.5404
7367	Regions/em	1223.06	1117.34	0		0.0562345	0.493414	2.02846	0.886167	0.865478	0.496384	1.26495
7368	Regions/em	1233.06	1117.34	0		0.0563984	0.371531	2.64341	0.888599	0.705183	0.614267	1.30769
7369	Regions/em	1243.06	1117.34	0		0.0421764	0.423685	2.81201	0.869147	0.669581	0.511404	1.22739
7370	Regions/em	1253.06	1117.34	0		0.0375102	0.452242	2.52483	0.846823	0.714177	0.526846	1.70356
7371	Regions/em	1263.06	1117.34	0		0.0388402	0.387553	2.93836	0.919346	0.783253	0.483867	1.10105
7372	Regions/em	1273.06	1117.34	0		0.0357031	0.409729	2.82837	0.893692	0.642021	0.598829	1.48961
7373	Regions/em	1283.06	1117.34	0		0.036279	0.302622	2.90086	0.739246	0.739548	0.54723	1.48756
7374	Regions/em	1293.06	1117.34	0		0.0357671	0.463091	2.64502	0.877869	0.686526	0.637718	1.44491
7375	Regions/em	1303.06	1117.34	0		0.0343456	0.394733	2.48014	0.803584	0.70785	0.577818	1.53372
7376	Regions/em	1313.06	1117.34	0		0.0302148	0.486931	3.08035	0.9041	0.453713	0.578043	1.2806
7377	Regions/em	1323.06	1117.34	0		0.0359151	0.379869	3.59692	0.901591	0.38953	0.711437	1.91448
7378	Regions/em	1333.06	1117.34	0		0.0434664	0.438791	3.47789	0.801377	0.336462	0.581679	1.70003
7379	Regions/em	1343.06	1117.34	0		0.0548137	0.47192	3.61565	0.805556	0.37076	0.622902	1.76128
7380	Regions/em	1353.06	1117.34	0		0.0562227	0.52535	3.10888	1.01927	0.306031	0.507757	1.37122
7381	Regions/em	1363.06	1117.34	0		0.0554155	0.509529	3.91031	0.968981	0.253106	0.658242	1.18449
7382	Regions/em	1373.06	1117.34	0		0.0683632	0.436316	3.94508	0.823219	0.237721	0.687535	1.29826
7383	Regions/em	1383.06	1117.34	0		0.0645455	0.488118	3.16555	1.05534	0.222169	0.679697	1.44916
7384	Regions/em	1393.06	1117.34	0		0.0545184	0.499259	3.90225	0.870513	0.19205	0.697153	1.19207
7385	Regions/em	1403.06	1117.34	0		0.0521165	0.425065	3.15607	0.892694	0.219671	0.845352	1.18477
7386	Regions/em	1413.06	1117.34	0		0.0617995	0.502503	3.43539	1.02011	0.201826	0.803409	1.06387
7387	Regions/em	1423.06	1117.34	0		0.0525066	0.46331	3.16373	0.934095	0.213655	0.769412	1.3238
7388	Regions/em	1433.06	1117.34	0		0.0579677	0.369628	3.91807	0.951425	0.215179	0.904866	1.45186
7389	Regions/em	1443.06	1117.34	0		0.0499513	0.444367	2.84367	0.977435	0.187231	0.857381	1.16518
7390	Regions/em	1453.06	1117.34	0		0.0472368	0.387297	3.34039	1.01767	0.172792	1.06772	1.79449
7391	Regions/em	1463.06	1117.34	0		0.0738547	0.322763	3.9958	0.927053	0.160936	0.976079	1.70056
7392	Regions/em	1473.06	1117.34	0		0.0685037	0.365328	4.09917	0.940859	0.159203	0.976503	1.42069
7393	Regions/em	1483.06	1117.34	0		0.0577025	0.343183	3.43017	1.19042	0.15983	0.756304	1.18218
7394	Regions/em	1493.06	1117.34	0		0.0513738	0.360686	2.94089	1.13742	0.168974	1.03714	1.88625
7395	Regions/em	1503.06	1117.34	0		0.059278	0.361291	3.49686	1.09625	0.153291	1.17089	1.55785
7396	Regions/em	1513.06	1117.34	0		0.0523366	0.339557	3.01325	1.20348	0.17351	0.841752	1.44586
7495	Regions/em	433.064	1107.34	0		0.0507226	0.431243	2.59517	1.14866	0.198085	0.855217	1.37794
7496	Regions/em	443.064	1107.34	0		0.0441964	0.393979	2.5962	1.15705	0.216728	0.936049	1.53179
7497	Regions/em	453.064	1107.34	0		0.0351222	0.454677	2.39917	0.970477	0.226207	0.83733	1.97387
7498	Regions/em	463.064	1107.34	0		0.0520952	0.35701	3.7639	1.05192	0.205115	0.800882	1.475
7499	Regions/em	473.064	1107.34	0		0.0501713	0.500005	2.55261	1.0797	0.22591	0.58612	1.068
7500	Regions/em	483.064	1107.34	0		0.0679213	0.424509	4.34273	0.842284	0.299726	0.574271	1.11047
7501	Regions/em	493.064	1107.34	0		0.0545966	0.417518	3.58373	0.783337	0.337101	0.440278	1.14646
7502	Regions/em	503.064	1107.34	0		0.0721987	0.468001	4.52032	0.682697	0.403363	0.346142	1.12849
7503	Regions/em	513.064	1107.34	0		0.0594586	0.591648	3.75973	0.709368	0.446036	0.370361	1.16008
7504	Regions/em	523.064	1107.34	0		0.0888032	0.445105	3.66842	0.733348	0.403147	0.354896	0.961816
7505	Regions/em	533.064	1107.34	0		0.0489196	0.502588	2.66861	0.775962	0.444123	0.453224	1.24344
7506	Regions/em	543.064	1107.34	0		0.0548067	0.550989	3.40639	0.78792	0.516639	0.385405	1.54898
7507	Regions/em	553.064	1107.34	0		0.0585741	0.359993	3.44955	0.83263	0.551555	0.467207	1.07359
7508	Regions/em	563.064	1107.34	0		0.0605633	0.32247	2.90184	0.844182	0.538163	0.709721	1.15089
7509	Regions/em	573.064	1107.34	0		0.0437964	0.292364	3.34001	0.861874	0.615423	0.84049	1.27466
7510	Regions/em	583.064	1107.34	0		0.0528646	0.199512	3.4055	0.923757	0.469643	0.968714	1.21459
7511	Regions/em	593.064	1107.34	0		0.0441936	0.334182	3.48403	0.919228	0.426886	0.895969	1.02061
7512	Regions/em	603.064	1107.34	0		0.0286655	0.267979	2.35297	0.895	0.468899	0.87316	0.895104
7513	Regions/em	613.064	1107.34	0		0.0362591	0.327426	2.84609	0.974613	0.585318	0.595612	0.92779
7514	Regions/em	623.064	1107.34	0		0.049897	0.291845	2.82374	0.911342	0.499913	0.886833	0.987808
7515	Regions/em	633.064	1107.34	0		0.0455752	0.331137	2.59227	1.0072	0.567424	0.793931	0.962745
7516	Regions/em	643.064	1107.34	0		0.03482	0.412024	2.56149	0.99101	0.692709	0.732004	1.55312
7517	Regions/em	653.064	1107.34	0		0.0366147	0.379673	2.58615	0.948473	0.493674	0.814646	1.03017
7518	Regions/em	663.064	1107.34	0		0.0375444	0.350864	2.49271	1.04	0.735008	0.717923	1.12407
7519	Regions/em	673.064	1107.34	0		0.0320012	0.306704	2.63338	0.987612	0.733015	0.668032	1.34412
7520	Regions/em	683.064	1107.34	0		0.0272058	0.367112	2.35277	0.764939	0.739721	0.679741	1.58036
7521	Regions/em	693.064	1107.34	0		0.0376216	0.429714	2.18128	0.751409	0.794493	0.531857	1.05073
7522	Regions/em	703.064	1107.34	0		0.0432279	0.425356	2.35819	0.845463	1.08129	0.453629	1.46585
7523	Regions/em	713.064	1107.34	0		0.0455088	0.476592	1.78063	0.708586	0.68952	0.718927	1.2889
7524	Regions/em	723.064	1107.34	0		0.0259872	0.582988	1.81667	0.684436	1.07316	0.521934	1.56018
7525	Regions/em	733.064	1107.34	0		0.0336699	0.61528	1.38262	0.712046	1.19633	0.421668	1.61702
7526	Regions/em	743.064	1107.34	0		0.0294995	0.688023	1.421	0.55783	1.12838	0.475532	1.85001
7527	Regions/em	753.064	1107.34	0		0.0311143	0.751225	1.28413	0.58996	1.03091	0.467593	1.47902
7528	Regions/em	763.064	1107.34	0		0.0222052	0.741008	1.36957	0.54185	1.16977	0.468447	1.42543
7529	Regions/em	773.064	1107.34	0		0.0289702	0.821936	1.1786	0.491	1.58628	0.457967	1.51086
7530	Regions/em	783.064	1107.34	0		0.0273191	0.855115	1.10348	0.515558	1.01717	0.503601	2.01457
7531	Regions/em	793.064	1107.34	0		0.0203575	0.984547	1.00342	0.624699	1.14274	0.395222	1.21454
7532	Regions/em	803.064	1107.34	0		0.0312697	0.70068	1.45742	0.572976	0.917796	0.449267	1.71096
7533	Regions/em	813.064	1107.34	0		0.0301621	1.1096	0.957986	0.516794	1.38767	0.441134	2.20113
7534	Regions/em	823.064	1107.34	0		0.0216755	0.937134	1.14621	0.581835	1.43433	0.401904	1.77718
7535	Regions/em	833.064	1107.34	0		0.0278257	0.84752	1.18403	0.580596	1.29332	0.366619	1.25804
7536	Regions/em	843.064	1107.34	0		0.0281137	1.0391	1.10298	0.52147	1.15907	0.479126	1.59148
7537	Regions/em	853.064	1107.34	0		0.0394844	1.06787	0.892578	0.570298	1.3168	0.372468	1.14226
7538	Regions/em	863.064	1107.34	0		0.0384757	0.950829	1.10257	0.558606	1.27578	0.381371	2.07493
7539	Regions/em	873.064	1107.34	0		0.0299358	0.882082	1.17011	0.544078	1.38947	0.3067	1.30897
7540	Regions/em	883.064	1107.34	0		0.0321165	0.624825	1.36304	0.466612	1.55454	0.385765	1.44411
7541	Regions/em	893.064	1107.34	0		0.03525	0.78415	1.0934	0.472226	1.21649	0.388411	1.66626
7542	Regions/em	903.064	1107.34	0		0.0364802	0.780566	1.08924	0.494	1.21391	0.354036	1.84399
7543	Regions/em	913.064	1107.34	0		0.0370118	0.793675	1.21546	0.531585	1.01113	0.403547	1.42722
7544	Regions/em	923.064	1107.34	0		0.0378814	0.749507	1.39414	0.540372	0.917251	0.427936	2.06896
7545	Regions/em	933.064	1107.34	0		0.0304317	0.889451	1.06256	0.598	0.905455	0.399151	1.72885
7546	Regions/em	943.064	1107.34	0		0.0359688	0.928033	1.1807	0.461777	1.10175	0.419623	1.59592
7547	Regions/em	953.064	1107.34	0		0.035104	0.954133	1.00775	0.526099	1.02829	0.435282	1.98684
7548	Regions/em	963.064	1107.34	0		0.0352911	0.855591	1.34351	0.536694	0.999489	0.459724	1.56793
7549	Regions/em	973.064	1107.34	0		0.0306783	0.948187	0.929603	0.50647	1.30685	0.367504	1.5818
7550	Regions/em	983.064	1107.34	0		0.0302903	0.87331	1.3238	0.586	0.835474	0.507051	2.17247
7551	Regions/em	993.064	1107.34	0		0.0303499	0.844263	1.19222	0.555637	1.07593	0.40302	1.61262
7552	Regions/em	1003.06	1107.34	0		0.0397383	1.01831	1.06311	0.45782	1.28029	0.462381	2.07762
7553	Regions/em	1013.06	1107.34	0		0.0401262	0.992703	1.1123	0.439418	1.29074	0.380788	2.16904
7554	Regions/em	1023.06	1107.34	0		0.0337575	1.07304	0.829441	0.561581	1.34152	0.447208	2.04718
7555	Regions/em	1033.06	1107.34	0		0.0301158	0.945823	1.30988	0.504359	1.07211	0.52256	1.91728
7556	Regions/em	1043.06	1107.34	0		0.0225928	0.973587	1.05522	0.432	1.31997	0.391181	1.40733
7557	Regions/em	1053.06	1107.34	0		0.0262308	0.908319	1.18554	0.465087	1.35377	0.520491	2.13688
7558	Regions/em	1063.06	1107.34	0		0.0245272	0.996208	1.1403	0.498849	1.37679	0.362722	1.7607
7559	Regions/em	1073.06	1107.34	0		0.0271218	1.01374	1.08307	0.531032	1.23636	0.526373	2.2839
7560	Regions/em	1083.06	1107.34	0		0.0246653	0.915631	1.17975	0.614	0.959485	0.427131	1.53611
7561	Regions/em	1093.06	1107.34	0		0.0249442	1.06526	1.18083	0.445521	1.45251	0.464922	2.60957
7562	Regions/em	1103.06	1107.34	0		0.028934	0.962986	1.2467	0.533838	0.99211	0.476865	1.77293
7563	Regions/em	1113.06	1107.34	0		0.028578	0.872081	1.0296	0.535297	0.894094	0.592655	1.73547
7564	Regions/em	1123.06	1107.34	0		0.0350549	0.832438	1.45084	0.568563	0.841832	0.562721	1.49182
7565	Regions/em	1133.06	1107.34	0		0.0332249	0.650911	1.29002	0.580152	0.800122	0.50376	1.32846
7566	Regions/em	1143.06	1107.34	0		0.0279279	0.66515	1.21015	0.693957	0.628744	0.601192	1.51769
7567	Regions/em	1153.06	1107.34	0		0.0388726	0.587928	1.33001	0.684776	0.703422	0.741261	1.6823
7568	Regions/em	1163.06	1107.34	0		0.0570033	0.669112	1.46537	0.578372	0.740691	0.730578	1.84107
7569	Regions/em	1173.06	1107.34	0		0.0734846	0.636349	1.48304	0.545106	0.910633	0.549935	1.47295
7570	Regions/em	1183.06	1107.34	0		0.0620803	0.648151	1.44038	0.652064	0.73998	0.597846	1.52954
7571	Regions/em	1193.06	1107.34	0		0.0673767	0.723217	1.30556	0.708349	0.8249	0.606981	1.57599
7572	Regions/em	1203.06	1107.34	0		0.074273	0.654472	1.32934	0.692348	0.877937	0.74114	1.93047
7573	Regions/em	1213.06	1107.34	0		0.0540404	0.575017	1.58885	0.737943	1.00353	0.596701	1.96332
7574	Regions/em	1223.06	1107.34	0		0.0550357	0.558833	1.62771	0.784789	0.845674	0.496447	1.70503
7575	Regions/em	1233.06	1107.34	0		0.0617183	0.397117	1.84261	0.766109	0.851637	0.447436	1.28613
7576	Regions/em	1243.06	1107.34	0		0.0509084	0.451033	1.81452	0.815104	0.896358	0.467607	1.19532
7577	Regions/em	1253.06	1107.34	0		0.0499146	0.535402	2.22134	0.876006	0.853397	0.553913	1.59223
7578	Regions/em	1263.06	1107.34	0		0.0420278	0.376427	2.43077	0.872224	0.63286	0.560427	1.12418
7579	Regions/em	1273.06	1107.34	0		0.0486518	0.361884	2.18184	0.729132	0.79026	0.590943	1.28963
7580	Regions/em	1283.06	1107.34	0		0.0338321	0.458437	2.23806	0.977537	0.588175	0.658328	1.79628
7581	Regions/em	1293.06	1107.34	0		0.0286735	0.436831	2.45437	0.921764	0.735324	0.578615	1.36356
7582	Regions/em	1303.06	1107.34	0		0.0363088	0.333803	2.71552	0.918	0.487563	0.689725	1.28724
7583	Regions/em	1313.06	1107.34	0		0.0287717	0.325495	2.51253	0.97906	0.613596	0.689738	1.329
7584	Regions/em	1323.06	1107.34	0		0.029591	0.318511	2.71415	0.899794	0.444437	0.719201	1.27374
7585	Regions/em	1333.06	1107.34	0		0.0381137	0.444544	2.82298	0.844496	0.390587	0.647917	1.54277
7586	Regions/em	1343.06	1107.34	0		0.0424249	0.558589	2.91966	0.785332	0.425862	0.465187	1.27328
7587	Regions/em	1353.06	1107.34	0		0.0507418	0.550994	3.85464	0.88461	0.360463	0.475492	1.33391
7588	Regions/em	1363.06	1107.34	0		0.0571532	0.510025	3.79625	0.802896	0.306397	0.601889	1.35728
7589	Regions/em	1373.06	1107.34	0		0.0545537	0.521931	4.24203	0.839639	0.268167	0.656922	1.26125
7590	Regions/em	1383.06	1107.34	0		0.0666659	0.482431	3.66316	0.856643	0.269262	0.615143	1.213
7591	Regions/em	1393.06	1107.34	0		0.0558463	0.419448	3.28252	0.89315	0.263991	0.628158	1.38575
7592	Regions/em	1403.06	1107.34	0		0.0563157	0.483501	3.4522	0.898503	0.204321	0.66919	1.08555
7593	Regions/em	1413.06	1107.34	0		0.0515282	0.435233	3.39019	0.869207	0.200743	0.940744	1.55045
7594	Regions/em	1423.06	1107.34	0		0.0441952	0.399688	3.55076	0.90412	0.221494	0.805946	1.20597
7595	Regions/em	1433.06	1107.34	0		0.0510508	0.383569	3.11048	0.848391	0.201384	0.911351	1.58693
7596	Regions/em	1443.06	1107.34	0		0.0624235	0.547061	3.30408	1.0108	0.211985	0.883734	1.23994
7597	Regions/em	1453.06	1107.34	0		0.0636522	0.376884	2.45224	1.09484	0.172212	0.951669	1.30749
7598	Regions/em	1463.06	1107.34	0		0.0524004	0.432885	3.36624	1.11597	0.142467	1.07403	1.77213
7599	Regions/em	1473.06	1107.34	0		0.0613258	0.428193	3.02273	1.02894	0.162605	0.944077	1.3707
7600	Regions/em	1483.06	1107.34	0		0.0483405	0.412445	2.73173	1.05292	0.157778	1.0313	1.93743
7601	Regions/em	1493.06	1107.34	0		0.0554967	0.36561	3.15912	1.22667	0.151744	1.16568	1.83763
7602	Regions/em	1503.06	1107.34	0		0.0566457	0.36882	2.85739	1.15516	0.12462	1.23771	1.67722
7603	Regions/em	1513.06	1107.34	0		0.05499	0.377629	3.12196	1.20597	0.137576	0.99672	1.6313
7604	Regions/em	1523.06	1107.34	0		0.0577789	0.356513	3.70707	1.12895	0.188827	0.915819	1.74522
7701	Regions/em	423.064	1097.34	0		0.0416282	0.395972	2.95754	1.19253	0.207322	0.916948	1.27256
7702	Regions/em	433.064	1097.34	0		0.0537385	0.347825	2.91259	1.12014	0.234525	0.678734	1.36756
7703	Regions/em	443.064	1097.34	0		0.0404098	0.43461	2.48193	1.04258	0.213429	0.779583	1.29794
7704	Regions/em	453.064	1097.34	0		0.0488222	0.350342	3.6887	0.934649	0.23537	0.881091	1.87182
7705	Regions/em	463.064	1097.34	0		0.0699498	0.459621	2.59499	0.88747	0.256859	0.603348	1.68052
7706	Regions/em	473.064	1097.34	0		0.0587103	0.385725	2.97896	0.989753	0.269169	0.725449	1.55678
7707	Regions/em	483.064	1097.34	0		0.0484998	0.471074	3.19056	0.896954	0.293568	0.523617	1.46423
7708	Regions/em	493.064	1097.34	0		0.068851	0.482348	4.40477	0.747954	0.396764	0.336777	0.950883
7709	Regions/em	503.064	1097.34	0		0.0799574	0.432377	3.46623	0.67905	0.449527	0.343886	0.955017
7710	Regions/em	513.064	1097.34	0		0.0592418	0.363632	4.8935	0.660134	0.457022	0.427301	1.27777
7711	Regions/em	523.064	1097.34	0		0.0695532	0.408426	2.79766	0.716368	0.547075	0.280917	0.87013
7712	Regions/em	533.064	1097.34	0		0.055969	0.408161	3.51146	0.704745	0.534055	0.338995	1.10334
7713	Regions/em	543.064	1097.34	0		0.0772523	0.446897	3.46229	0.720605	0.532805	0.437618	0.999652
7714	Regions/em	553.064	1097.34	0		0.0726417	0.389343	3.03407	0.731197	0.505144	0.574292	1.19033
7715	Regions/em	563.064	1097.34	0		0.0529439	0.338403	2.82554	0.856366	0.556062	0.789377	1.18668
7716	Regions/em	573.064	1097.34	0		0.0477249	0.335446	3.07137	0.794	0.540532	1.02885	1.56307
7717	Regions/em	583.064	1097.34	0		0.0450246	0.30803	2.85095	0.831853	0.604818	0.751503	1.10856
7718	Regions/em	593.064	1097.34	0		0.0417122	0.270648	2.65095	1.03297	0.525034	1.16517	1.3047
7719	Regions/em	603.064	1097.34	0		0.0338881	0.297182	3.85689	0.867815	0.562474	1.00056	1.43367
7720	Regions/em	613.064	1097.34	0		0.0369075	0.286523	2.93283	1.00216	0.609717	0.89328	1.30491
7721	Regions/em	623.064	1097.34	0		0.0345756	0.3747	3.06069	0.924119	0.565082	0.7824	1.0965
7722	Regions/em	633.064	1097.34	0		0.0336465	0.307201	2.48553	0.893241	0.679419	0.892516	1.13401
7723	Regions/em	643.064	1097.34	0		0.0373011	0.321362	3.60099	1.03183	0.719542	0.704887	1.50958
7724	Regions/em	653.064	1097.34	0		0.0540677	0.337353	2.44238	0.875665	0.523022	0.828306	1.21508
7725	Regions/em	663.064	1097.34	0		0.0549478	0.392888	2.42898	0.988681	0.543937	0.764593	1.17929
7726	Regions/em	673.064	1097.34	0		0.0302387	0.346822	2.485	0.896624	0.781534	0.623031	1.43892
7727	Regions/em	683.064	1097.34	0		0.0251665	0.409079	2.0708	0.730345	0.984539	0.44206	1.39146
7728	Regions/em	693.064	1097.34	0		0.0243708	0.428729	2.41077	0.86689	1.25485	0.441164	2.30471
7729	Regions/em	703.064	1097.34	0		0.0287677	0.377366	1.97773	0.806611	0.793222	0.452544	1.50368
7730	Regions/em	713.064	1097.34	0		0.0273135	0.487365	1.84848	0.673616	1.05267	0.449798	1.77361
7731	Regions/em	723.064	1097.34	0		0.0273177	0.520649	1.85397	0.741359	0.9155	0.514957	1.65006
7732	Regions/em	733.064	1097.34	0		0.0182011	0.624521	1.52544	0.563	0.924348	0.473487	1.2406
7733	Regions/em	743.064	1097.34	0		0.0302461	0.88423	1.2135	0.497063	1.40667	0.460377	2.62188
7734	Regions/em	753.064	1097.34	0		0.0306598	0.841169	1.11818	0.518164	1.41325	0.466716	1.75254
7735	Regions/em	763.064	1097.34	0		0.0231243	0.736454	1.22597	0.521298	1.24238	0.427824	1.66182
7736	Regions/em	773.064	1097.34	0		0.0219022	0.950449	1.08934	0.464638	1.08316	0.497037	2.17003
7737	Regions/em	783.064	1097.34	0		0.0415927	0.590534	1.65703	0.529	1.05014	0.356563	0.894986
7738	Regions/em	793.064	1097.34	0		0.0253007	1.1215	0.81446	0.581	1.41731	0.405224	1.08097
7739	Regions/em	803.064	1097.34	0		0.0389668	0.751353	1.25551	0.49148	1.16096	0.463289	1.99294
7740	Regions/em	813.064	1097.34	0		0.036518	0.744094	1.12256	0.498146	1.27744	0.430072	1.9607
7741	Regions/em	823.064	1097.34	0		0.0338508	0.962673	0.940648	0.472009	1.23753	0.390975	1.55906
7742	Regions/em	833.064	1097.34	0		0.0240757	0.952547	1.35536	0.561297	1.0562	0.477234	1.85915
7743	Regions/em	843.064	1097.34	0		0.0354426	0.771947	1.19825	0.695119	1.06701	0.423257	1.46005
7744	Regions/em	853.064	1097.34	0		0.0467883	0.805558	1.07136	0.507437	1.19961	0.411185	1.37604
7745	Regions/em	863.064	1097.34	0		0.0447846	0.973754	0.918821	0.441	1.05492	0.377665	0.981717
7746	Regions/em	873.064	1097.34	0		0.0311164	1.2871	0.887953	0.502629	1.36949	0.431624	2.26762
7747	Regions/em	883.064	1097.34	0		0.0268159	0.950159	1.04069	0.558	1.2386	0.306871	1.3271
7748	Regions/em	893.064	1097.34	0		0.0329154	0.89504	0.996265	0.522082	1.48248	0.328873	1.47889
7749	Regions/em	903.064	1097.34	0		0.038146	0.890468	1.03701	0.477322	1.10119	0.506751	2.80591
7750	Regions/em	913.064	1097.34	0		0.0374985	0.803484	1.2427	0.525939	1.19686	0.39025	2.4159
7751	Regions/em	923.064	1097.34	0		0.0310976	1.17957	0.788391	0.57198	1.27711	0.404659	1.5228
7752	Regions/em	933.064	1097.34	0		0.0385428	0.93396	0.993753	0.553115	1.26604	0.379842	1.4164
7753	Regions/em	943.064	1097.34	0		0.0372443	0.983289	0.940113	0.568958	1.14366	0.371351	1.83593
7754	Regions/em	953.064	1097.34	0		0.0374216	0.788128	1.1052	0.532756	1.17331	0.445534	1.61034
7755	Regions/em	963.064	1097.34	0		0.0407343	1.00004	0.987879	0.512603	1.44468	0.361774	1.62804
7756	Regions/em	973.064	1097.34	0		0.0303696	0.880359	1.37686	0.557431	1.00377	0.37112	1.63838
7757	Regions/em	983.064	1097.34	0		0.025458	0.786145	1.3209	0.700703	0.98831	0.320142	1.09323
7758	Regions/em	993.064	1097.34	0		0.0295756	1.26924	0.906223	0.453	1.28236	0.284717	1.51569
7759	Regions/em	1003.06	1097.34	0		0.0288978	0.909318	1.28232	0.447454	1.06506	0.367022	1.42961
7760	Regions/em	1013.06	1097.34	0		0.0334219	0.918823	1.20492	0.538834	1.26367	0.476196	2.21905
7761	Regions/em	1023.06	1097.34	0		0.0287007	0.927065	1.01526	0.415	1.1625	0.544308	2.11368
7762	Regions/em	1033.06	1097.34	0		0.026998	1.10214	0.853841	0.403189	1.46402	0.432812	2.19167
7763	Regions/em	1043.06	1097.34	0		0.0215536	0.915362	1.2401	0.541	1.31369	0.418524	2.39589
7764	Regions/em	1053.06	1097.34	0		0.0333425	0.799631	1.46596	0.588568	0.970137	0.430416	1.53054
7765	Regions/em	1063.06	1097.34	0		0.0320247	1.01374	1.0653	0.63935	0.788367	0.614519	1.67989
7766	Regions/em	1073.06	1097.34	0		0.0249443	1.14245	1.01614	0.405019	1.46216	0.459271	2.28173
7767	Regions/em	1083.06	1097.34	0		0.0222663	0.994995	1.21072	0.502646	1.56848	0.456446	1.85948
7768	Regions/em	1093.06	1097.34	0		0.0344363	0.982917	1.37494	0.485797	1.15681	0.475134	1.92178
7769	Regions/em	1103.06	1097.34	0		0.0314525	0.937792	1.35885	0.513356	1.09956	0.567491	2.25992
7770	Regions/em	1113.06	1097.34	0		0.0317817	0.817158	1.18788	0.519691	0.825455	0.607449	1.4727
7771	Regions/em	1123.06	1097.34	0		0.0336761	0.792985	1.09405	0.594085	0.676769	0.52428	1.17455
7772	Regions/em	1133.06	1097.34	0		0.0235936	0.650029	1.25063	0.559988	0.648014	0.465615	1.22056
7773	Regions/em	1143.06	1097.34	0		0.0260872	0.560136	1.23555	0.814765	0.454052	0.545247	0.890863
7774	Regions/em	1153.06	1097.34	0		0.0438382	0.618023	1.46182	0.622328	0.536077	0.758243	1.71287
7775	Regions/em	1163.06	1097.34	0		0.0495367	0.501659	1.78739	0.844077	0.542681	0.525058	1.00106
7776	Regions/em	1173.06	1097.34	0		0.0483579	0.699602	1.21264	0.647102	0.726261	0.510635	1.17014
7777	Regions/em	1183.06	1097.34	0		0.0800705	0.708653	1.21881	0.527031	1.07316	0.729494	2.04191
7778	Regions/em	1193.06	1097.34	0		0.0799677	0.748087	1.13039	0.535446	0.886021	0.570761	1.89656
7779	Regions/em	1203.06	1097.34	0		0.0609471	0.713666	1.15719	0.582494	0.80719	0.56898	1.56402
7780	Regions/em	1213.06	1097.34	0		0.0474563	0.696022	1.39188	0.685563	0.840993	0.583525	1.72652
7781	Regions/em	1223.06	1097.34	0		0.0599922	0.623113	1.38961	0.736784	1.06385	0.514441	1.64576
7782	Regions/em	1233.06	1097.34	0		0.0420872	0.476293	1.73045	0.828558	0.814318	0.579243	1.91786
7783	Regions/em	1243.06	1097.34	0		0.0668576	0.474829	1.89472	0.681946	0.878961	0.549182	2.04125
7784	Regions/em	1253.06	1097.34	0		0.0507607	0.411269	1.79359	0.767169	0.869494	0.54264	1.51787
7785	Regions/em	1263.06	1097.34	0		0.0401477	0.360397	1.6942	0.731198	0.834315	0.520358	1.93861
7786	Regions/em	1273.06	1097.34	0		0.0286054	0.484512	1.99349	1.0273	0.717735	0.60637	2.20242
7787	Regions/em	1283.06	1097.34	0		0.0300543	0.420318	1.95443	0.809685	0.969832	0.495832	1.97432
7788	Regions/em	1293.06	1097.34	0		0.0260662	0.441505	2.37308	1.03971	0.694918	0.566404	1.75177
7789	Regions/em	1303.06	1097.34	0		0.0328421	0.343061	2.78741	1.07745	0.480785	0.647713	1.6086
7790	Regions/em	1313.06	1097.34	0		0.0257768	0.324516	2.99636	1.05956	0.590391	0.658323	1.6524
7791	Regions/em	1323.06	1097.34	0		0.0324451	0.359359	3.27496	1.08165	0.49584	0.757638	1.6322
7792	Regions/em	1333.06	1097.34	0		0.0313423	0.354259	3.29887	0.903733	0.476214	0.592878	1.11138
7793	Regions/em	1343.06	1097.34	0		0.0359694	0.43312	3.23759	0.908	0.493679	0.565329	1.47153
7794	Regions/em	1353.06	1097.34	0		0.0386753	0.471247	3.33169	0.729274	0.468396	0.659319	1.59185
7795	Regions/em	1363.06	1097.34	0		0.0468827	0.415064	3.26998	0.700134	0.468469	0.647207	1.72122
7796	Regions/em	1373.06	1097.34	0		0.0527963	0.440463	3.26098	0.700484	0.37799	0.495119	1.13713
7797	Regions/em	1383.06	1097.34	0		0.0526702	0.590584	3.52144	0.886136	0.317424	0.665366	1.45623
7798	Regions/em	1393.06	1097.34	0		0.0570369	0.47285	3.41641	0.837127	0.260896	0.610645	1.24757
7799	Regions/em	1403.06	1097.34	0		0.0502167	0.493932	3.12372	0.872967	0.233741	0.788977	1.54999
7800	Regions/em	1413.06	1097.34	0		0.0420897	0.476587	3.41854	0.966089	0.252734	0.647884	1.23094
7801	Regions/em	1423.06	1097.34	0		0.0465818	0.546819	3.8949	0.931886	0.2978	0.764182	1.85425
7802	Regions/em	1433.06	1097.34	0		0.0508128	0.484581	3.27762	0.859738	0.268037	0.597703	0.991
7803	Regions/em	1443.06	1097.34	0		0.0539508	0.510809	3.04243	0.705604	0.24691	0.722374	1.10257
7804	Regions/em	1453.06	1097.34	0		0.0435506	0.427801	3.19747	0.951336	0.226238	0.77093	1.54029
7805	Regions/em	1463.06	1097.34	0		0.0763815	0.439064	4.01807	1.06933	0.174358	0.806536	1.1031
7806	Regions/em	1473.06	1097.34	0		0.0583294	0.536928	2.90778	1.00068	0.169726	0.93116	1.36007
7807	Regions/em	1483.06	1097.34	0		0.0654048	0.369241	4.33414	0.955327	0.172604	0.790522	1.30965
7808	Regions/em	1493.06	1097.34	0		0.0540255	0.296146	3.47051	1.07252	0.186	0.736994	1.07352
7809	Regions/em	1503.06	1097.34	0		0.0582701	0.341849	3.08503	1.18702	0.149356	0.969578	1.86024
7810	Regions/em	1513.06	1097.34	0		0.0563434	0.323463	3.7036	1.19593	0.176937	0.892951	1.1643
7811	Regions/em	1523.06	1097.34	0		0.0469857	0.350954	3.19174	1.15479	0.210766	0.755511	1.27198
7812	Regions/em	1533.06	1097.34	0		0.0484331	0.318419	3.43589	1.02966	0.232418	0.696948	1.23123
7908	Regions/em	423.064	1087.34	0		0.0695753	0.386379	2.93531	1.0208	0.246524	0.66026	1.32525
7909	Regions/em	433.064	1087.34	0		0.0470087	0.359298	2.99851	0.990758	0.297735	0.578796	1.12886
7910	Regions/em	443.064	1087.34	0		0.0435753	0.352609	4.01266	0.968715	0.279872	0.607531	1.13908
7911	Regions/em	453.064	1087.34	0		0.041355	0.477649	2.83692	0.987188	0.263915	0.648887	1.36728
7912	Regions/em	463.064	1087.34	0		0.0559934	0.42035	2.90421	0.836571	0.296042	0.589218	1.33509
7913	Regions/em	473.064	1087.34	0		0.057206	0.401054	3.19811	0.873685	0.280596	0.55589	1.526
7914	Regions/em	483.064	1087.34	0		0.0708581	0.424681	2.2507	0.90089	0.295662	0.475582	1.1385
7915	Regions/em	493.064	1087.34	0		0.0796664	0.405791	3.50057	0.716765	0.385253	0.378304	0.903572
7916	Regions/em	503.064	1087.34	0		0.0942924	0.355972	4.09913	0.549677	0.464506	0.468831	1.45906
7917	Regions/em	513.064	1087.34	0		0.0660094	0.368485	3.6107	0.588074	0.529171	0.399151	1.51497
7918	Regions/em	523.064	1087.34	0		0.05651	0.488116	3.55814	0.68213	0.490127	0.476048	1.13472
7919	Regions/em	533.064	1087.34	0		0.0580459	0.475584	2.53757	0.783031	0.522078	0.58571	1.24882
7920	Regions/em	543.064	1087.34	0		0.0414947	0.429358	3.17365	0.813866	0.510041	0.591017	1.47133
7921	Regions/em	553.064	1087.34	0		0.0546288	0.312631	3.01914	0.650962	0.52792	0.61301	1.23132
7922	Regions/em	563.064	1087.34	0		0.0486721	0.317741	3.29275	0.800505	0.596438	0.735596	1.12359
7923	Regions/em	573.064	1087.34	0		0.042061	0.37375	2.32224	1.04039	0.628095	0.923974	1.45915
7924	Regions/em	583.064	1087.34	0		0.0504255	0.329336	2.3357	0.897546	0.573726	0.941823	1.48168
7925	Regions/em	593.064	1087.34	0		0.0400236	0.294126	3.24291	0.851131	0.646047	0.808598	1.12801
7926	Regions/em	603.064	1087.34	0		0.0338476	0.331966	2.57318	0.831627	0.615934	0.844409	1.50269
7927	Regions/em	613.064	1087.34	0		0.033665	0.296155	2.39985	0.920443	0.63052	1.00861	1.49679
7928	Regions/em	623.064	1087.34	0		0.0341805	0.264712	2.80688	0.899	0.718941	0.602514	1.20488
7929	Regions/em	633.064	1087.34	0		0.0336221	0.332423	3.02005	0.925582	0.686334	0.731081	1.10929
7930	Regions/em	643.064	1087.34	0		0.0438628	0.42159	2.29668	0.870998	0.626293	0.751478	1.22272
7931	Regions/em	653.064	1087.34	0		0.0651892	0.37102	2.61642	0.8813	0.622258	0.685825	1.0818
7932	Regions/em	663.064	1087.34	0		0.0821971	0.349078	2.49302	0.816284	0.785716	0.602264	1.14833
7933	Regions/em	673.064	1087.34	0		0.0447486	0.416286	2.11279	0.854949	1.11237	0.452734	1.77365
7934	Regions/em	683.064	1087.34	0		0.0386953	0.444716	1.82286	0.774308	1.18351	0.483783	1.68847
7935	Regions/em	693.064	1087.34	0		0.028397	0.540143	1.58033	0.705522	1.2418	0.436484	2.32878
7936	Regions/em	703.064	1087.34	0		0.0373802	0.491297	1.85593	0.684	1.11491	0.430309	1.83394
7937	Regions/em	713.064	1087.34	0		0.0249332	0.53779	1.74567	0.613432	1.19714	0.560154	1.96677
7938	Regions/em	723.064	1087.34	0		0.0233337	0.712993	1.42395	0.663343	0.976008	0.49681	1.86801
7939	Regions/em	733.064	1087.34	0		0.0239446	0.684296	1.43011	0.66498	1.05681	0.419572	1.55727
7940	Regions/em	743.064	1087.34	0		0.0354648	0.703069	1.52809	0.692546	0.971158	0.555107	1.30667
7941	Regions/em	753.064	1087.34	0		0.0354718	0.780382	1.24393	0.538279	1.31659	0.53591	1.85098
7942	Regions/em	763.064	1087.34	0		0.0335106	0.692007	1.48485	0.656618	1.05363	0.54553	1.88337
7943	Regions/em	773.064	1087.34	0		0.0259946	0.878117	1.19742	0.484245	1.30638	0.484241	2.52774
7944	Regions/em	783.064	1087.34	0		0.0536277	0.703604	1.15596	0.538065	1.2643	0.398944	1.66316
7945	Regions/em	793.064	1087.34	0		0.0323321	1.34157	0.70747	0.500312	1.20786	0.425123	1.69142
7946	Regions/em	803.064	1087.34	0		0.0347791	1.05665	1.20689	0.438681	1.15761	0.433831	1.64245
7947	Regions/em	813.064	1087.34	0		0.0385092	1.24961	0.877161	0.399802	1.48202	0.399831	2.75401
7948	Regions/em	823.064	1087.34	0		0.0276974	0.886245	1.34596	0.450228	1.13405	0.365909	1.44718
7949	Regions/em	833.064	1087.34	0		0.0265481	0.992721	1.13478	0.413	1.46726	0.401595	2.03831
7950	Regions/em	843.064	1087.34	0		0.0280679	0.979778	1.04109	0.475	1.39121	0.399461	1.48393
7951	Regions/em	853.064	1087.34	0		0.024965	0.894001	1.14863	0.550468	1.42971	0.285287	1.63533
7952	Regions/em	863.064	1087.34	0		0.029697	1.01825	1.19432	0.52	1.60919	0.367187	1.97732
7953	Regions/em	873.064	1087.34	0		0.0315171	1.17992	0.896502	0.391659	1.29234	0.39049	1.34545
7954	Regions/em	883.064	1087.34	0		0.0363681	0.941255	1.00962	0.465411	1.36171	0.399956	2.38168
7955	Regions/em	893.064	1087.34	0		0.0451384	0.962088	0.949773	0.44503	1.2178	0.466288	2.06414
7956	Regions/em	903.064	1087.34	0		0.0323924	1.12561	0.903795	0.511336	1.10398	0.35396	1.41851
7957	Regions/em	913.064	1087.34	0		0.0366029	0.989802	1.06777	0.548	0.956055	0.338599	1.80474
7958	Regions/em	923.064	1087.34	0		0.0268611	1.26347	0.890846	0.584	1.20145	0.348664	1.6299
7959	Regions/em	933.064	1087.34	0		0.0314915	0.842099	0.931988	0.558009	1.17886	0.379805	1.69374
7960	Regions/em	943.064	1087.34	0		0.0369587	1.08124	1.0488	0.486165	1.12171	0.322773	1.36887
7961	Regions/em	953.064	1087.34	0		0.0371004	0.996018	0.96166	0.54619	1.19296	0.401803	1.92991
7962	Regions/em	963.064	1087.34	0		0.0358543	0.828103	1.20903	0.571998	1.07336	0.399997	1.51766
7963	Regions/em	973.064	1087.34	0		0.032419	1.07573	1.08569	0.516847	1.03375	0.354647	1.5802
7964	Regions/em	983.064	1087.34	0		0.0334735	0.963476	1.27806	0.537	1.43286	0.396611	1.75156
7965	Regions/em	993.064	1087.34	0		0.0328383	1.01178	0.965915	0.545	1.28573	0.360721	1.25338
7966	Regions/em	1003.06	1087.34	0		0.0217606	1.1789	1.12966	0.439	1.24124	0.467511	2.01204
7967	Regions/em	1013.06	1087.34	0		0.0340691	0.980242	0.962171	0.453147	1.57279	0.381157	1.86712
7968	Regions/em	1023.06	1087.34	0		0.0298358	0.888472	1.17281	0.418786	1.2088	0.435583	1.75425
7969	Regions/em	1033.06	1087.34	0		0.0247405	0.975107	1.26488	0.48203	1.1134	0.410931	1.39689
7970	Regions/em	1043.06	1087.34	0		0.0285075	1.02366	1.10742	0.538562	0.989146	0.464799	2.05805
7971	Regions/em	1053.06	1087.34	0		0.0290818	0.843625	1.38761	0.498929	1.15585	0.394621	1.38339
7972	Regions/em	1063.06	1087.34	0		0.0267899	1.03916	1.16243	0.471637	1.37974	0.399441	1.62893
7973	Regions/em	1073.06	1087.34	0		0.0276296	1.09459	1.02104	0.407913	1.35168	0.462531	1.43124
7974	Regions/em	1083.06	1087.34	0		0.0306837	0.74693	1.64608	0.469105	0.888932	0.578835	1.62698
7975	Regions/em	1093.06	1087.34	0		0.0378488	0.979824	1.07651	0.49184	1.19725	0.464057	1.53777
7976	Regions/em	1103.06	1087.34	0		0.0410679	1.04832	1.15795	0.463999	1.3025	0.455515	1.65548
7977	Regions/em	1113.06	1087.34	0		0.0445428	0.923993	1.51134	0.569	0.694986	0.614911	1.48177
7978	Regions/em	1123.06	1087.34	0		0.0309709	1.05472	0.907018	0.555018	0.580459	0.736063	1.55781
7979	Regions/em	1133.06	1087.34	0		0.0288272	0.591083	1.4747	0.675	0.666425	0.504505	1.12787
7980	Regions/em	1143.06	1087.34	0		0.0192996	0.665453	1.35898	0.715	0.503031	0.716056	1.20216
7981	Regions/em	1153.06	1087.34	0		0.0242164	0.579634	1.37627	0.727529	0.530157	0.695948	1.79295
7982	Regions/em	1163.06	1087.34	0		0.0319242	0.676821	1.46721	0.65	0.540895	0.566558	0.996874
7983	Regions/em	1173.06	1087.34	0		0.0360769	0.623377	1.5026	0.643	0.54645	0.749917	1.40044
7984	Regions/em	1183.06	1087.34	0		0.0581136	0.495127	1.33801	0.685804	0.65988	0.523687	1.30555
7985	Regions/em	1193.06	1087.34	0		0.0617694	0.694204	1.27658	0.649536	0.676559	0.631472	1.39939
7986	Regions/em	1203.06	1087.34	0		0.0485809	0.97587	0.87905	0.537917	0.807272	0.617189	1.39907
7987	Regions/em	1213.06	1087.34	0		0.0565528	0.628907	1.43679	0.488424	0.9793	0.57716	1.85893
7988	Regions/em	1223.06	1087.34	0		0.0630632	0.669017	1.35198	0.576174	1.10721	0.569916	2.2343
7989	Regions/em	1233.06	1087.34	0		0.0563928	0.557231	1.4242	0.634818	1.0666	0.545007	1.66609
7990	Regions/em	1243.06	1087.34	0		0.0511105	0.516378	1.47038	0.636756	1.02263	0.549132	2.16943
7991	Regions/em	1253.06	1087.34	0		0.0406811	0.472384	1.70791	0.723942	0.966343	0.641093	2.51733
7992	Regions/em	1263.06	1087.34	0		0.0440331	0.437261	1.66294	0.745343	0.847795	0.621342	2.50335
7993	Regions/em	1273.06	1087.34	0		0.0412949	0.418203	1.47113	0.712193	0.952887	0.394157	1.42915
7994	Regions/em	1283.06	1087.34	0		0.0429064	0.454487	2.01667	0.831468	0.795248	0.526104	2.06116
7995	Regions/em	1293.06	1087.34	0		0.033453	0.412098	1.99765	0.986546	0.824974	0.387395	1.14574
7996	Regions/em	1303.06	1087.34	0		0.0364056	0.392487	2.49391	1.05293	0.629185	0.557788	1.23606
7997	Regions/em	1313.06	1087.34	0		0.0250964	0.340334	2.86832	1.03225	0.672887	0.534031	1.44547
7998	Regions/em	1323.06	1087.34	0		0.0238855	0.350584	2.5133	1.0773	0.606977	0.65272	1.39503
7999	Regions/em	1333.06	1087.34	0		0.0299628	0.292866	2.4229	1.13702	0.606447	0.430657	0.929902
8000	Regions/em	1343.06	1087.34	0		0.0365956	0.341173	2.421	1.01185	0.511453	0.604405	1.24286
8001	Regions/em	1353.06	1087.34	0		0.0377948	0.400936	2.77045	0.864413	0.570433	0.581934	1.48745
8002	Regions/em	1363.06	1087.34	0		0.0395464	0.466141	3.38134	0.641191	0.573596	0.589693	1.60602
8003	Regions/em	1373.06	1087.34	0		0.0497342	0.344385	3.06547	0.655378	0.5561	0.583059	1.57228
8004	Regions/em	1383.06	1087.34	0		0.0714028	0.472628	2.87943	0.703747	0.469636	0.585823	1.50472
8005	Regions/em	1393.06	1087.34	0		0.0694897	0.409428	3.55633	0.696421	0.371549	0.584997	1.21056
8006	Regions/em	1403.06	1087.34	0		0.0479181	0.509262	3.48299	1.05472	0.325257	0.645751	1.45132
8007	Regions/em	1413.06	1087.34	0		0.0684583	0.468163	2.85644	0.760073	0.298718	0.713879	1.17253
8008	Regions/em	1423.06	1087.34	0		0.071388	0.450692	4.13004	0.816344	0.264674	0.643209	1.19816
8009	Regions/em	1433.06	1087.34	0		0.0524583	0.475734	2.93998	1.06929	0.2877	0.564249	1.13684
8010	Regions/em	1443.06	1087.34	0		0.0489377	0.432445	3.71894	0.859851	0.27781	0.498064	0.903391
8011	Regions/em	1453.06	1087.34	0		0.0600464	0.428632	3.59199	0.943799	0.20732	0.718208	1.23164
8012	Regions/em	1463.06	1087.34	0		0.0616224	0.477738	3.30565	1.07037	0.179317	0.792637	1.2264
8013	Regions/em	1473.06	1087.34	0		0.0571617	0.400866	3.08053	0.924067	0.179506	0.986257	1.44189
8014	Regions/em	1483.06	1087.34	0		0.0595534	0.388903	3.30461	0.935207	0.167388	1.07312	1.53505
8015	Regions/em	1493.06	1087.34	0		0.0527737	0.354538	3.68175	0.939496	0.18473	0.917095	1.41219
8016	Regions/em	1503.06	1087.34	0		0.0597118	0.365476	2.76802	1.03714	0.188547	0.880672	1.3049
8017	Regions/em	1513.06	1087.34	0		0.0406553	0.44286	2.86519	1.21	0.190831	0.901314	1.68049
8018	Regions/em	1523.06	1087.34	0		0.0543266	0.400242	3.38703	1.22256	0.189712	0.826552	1.31337
8019	Regions/em	1533.06	1087.34	0		0.0658888	0.310013	2.9511	1.01619	0.20901	0.719288	1.32094
8020	Regions/em	1543.06	1087.34	0		0.0450154	0.474213	2.99817	0.977112	0.229296	0.698417	1.37275
8114	Regions/em	413.064	1077.34	0		0.0512376	0.329561	2.96873	0.860899	0.256489	0.63646	1.29906
8115	Regions/em	423.064	1077.34	0		0.0454127	0.450244	2.72776	1.02728	0.288772	0.537473	1.00688
8116	Regions/em	433.064	1077.34	0		0.0472644	0.368423	3.22908	0.855588	0.238847	0.809419	1.18463
8117	Regions/em	443.064	1077.34	0		0.0427973	0.394508	3.95994	0.96706	0.273378	0.583912	1.08662
8118	Regions/em	453.064	1077.34	0		0.0424496	0.434676	2.97844	1.01594	0.306106	0.542088	1.27163
8119	Regions/em	463.064	1077.34	0		0.0509046	0.312499	3.97086	0.742268	0.317732	0.452839	1.33942
8120	Regions/em	473.064	1077.34	0		0.072392	0.37403	3.64524	0.817581	0.324957	0.512103	1.23475
8121	Regions/em	483.064	1077.34	0		0.0515984	0.368564	2.86899	0.851645	0.397649	0.500974	1.69638
8122	Regions/em	493.064	1077.34	0		0.0705771	0.418069	2.83756	0.721407	0.416546	0.431021	1.05392
8123	Regions/em	503.064	1077.34	0		0.0541795	0.486303	3.36652	0.747527	0.505524	0.442316	1.03105
8124	Regions/em	513.064	1077.34	0		0.0482001	0.391621	3.43817	0.734891	0.586486	0.462768	1.42384
8125	Regions/em	523.064	1077.34	0		0.0346748	0.465521	2.79341	0.846	0.5064	0.628003	1.9127
8126	Regions/em	533.064	1077.34	0		0.043927	0.378608	2.87831	0.903566	0.59788	0.546109	1.23526
8127	Regions/em	543.064	1077.34	0		0.0444804	0.419759	2.21849	0.834112	0.52698	0.778928	1.02202
8128	Regions/em	553.064	1077.34	0		0.0306375	0.384906	2.45712	0.866431	0.543101	0.740207	1.33736
8129	Regions/em	563.064	1077.34	0		0.0261759	0.290509	2.52747	0.852	0.634944	0.91571	1.8997
8130	Regions/em	573.064	1077.34	0		0.0398914	0.391376	2.65714	0.922806	0.649857	0.782766	1.26083
8131	Regions/em	583.064	1077.34	0		0.040378	0.311139	3.31002	0.857458	0.53109	0.9227	1.33668
8132	Regions/em	593.064	1077.34	0		0.0417251	0.383804	2.51416	0.880901	0.595756	0.945205	1.48837
8133	Regions/em	603.064	1077.34	0		0.0502765	0.304703	2.73743	0.832744	0.610063	0.974173	1.30589
8134	Regions/em	613.064	1077.34	0		0.0523187	0.305346	2.87767	0.876324	0.769222	0.739955	1.1659
8135	Regions/em	623.064	1077.34	0		0.0474823	0.309801	2.2914	0.762233	0.668421	0.841173	1.35055
8136	Regions/em	633.064	1077.34	0		0.0351694	0.355034	2.59366	0.877319	0.791764	0.72653	1.54956
8137	Regions/em	643.064	1077.34	0		0.0401326	0.338076	2.56867	0.807592	0.908495	0.586472	1.37848
8138	Regions/em	653.064	1077.34	0		0.042905	0.317908	2.38582	0.767	0.914529	0.542507	1.40437
8139	Regions/em	663.064	1077.34	0		0.0428332	0.410942	2.11289	0.826	1.19092	0.522675	1.61887
8140	Regions/em	673.064	1077.34	0		0.0429747	0.499747	1.78501	0.712659	1.25613	0.371025	1.53242
8141	Regions/em	683.064	1077.34	0		0.0458861	0.595959	1.93337	0.650599	1.11412	0.436305	1.48361
8142	Regions/em	693.064	1077.34	0		0.0258547	0.600746	1.43627	0.649	1.30549	0.353569	1.53435
8143	Regions/em	703.064	1077.34	0		0.0373274	0.658773	1.5348	0.717731	1.22783	0.434034	2.21306
8144	Regions/em	713.064	1077.34	0		0.028084	0.575581	1.41494	0.680837	0.99331	0.448521	1.61122
8145	Regions/em	723.064	1077.34	0		0.0246137	0.737004	1.17618	0.506466	1.15473	0.546489	1.90548
8146	Regions/em	733.064	1077.34	0		0.031833	0.846035	1.13526	0.469569	1.24473	0.608096	1.77056
8147	Regions/em	743.064	1077.34	0		0.0240434	0.90024	1.32106	0.481	1.09237	0.464897	1.51885
8148	Regions/em	753.064	1077.34	0		0.0282405	0.879409	1.12439	0.535443	1.26762	0.645238	2.54412
8149	Regions/em	763.064	1077.34	0		0.0268602	0.773106	1.2195	0.612	1.17826	0.408084	1.5753
8150	Regions/em	773.064	1077.34	0		0.0290143	0.788069	1.33703	0.506032	1.42067	0.386083	1.50173
8151	Regions/em	783.064	1077.34	0		0.0296451	0.984295	1.28408	0.633	1.1848	0.45487	1.58451
8152	Regions/em	793.064	1077.34	0		0.0202092	1.27472	0.924967	0.424358	0.973149	0.49256	2.2568
8153	Regions/em	803.064	1077.34	0		0.0330706	0.908603	1.00485	0.492422	1.30055	0.40505	1.36747
8154	Regions/em	813.064	1077.34	0		0.0290897	1.02528	1.08753	0.503778	1.37032	0.464367	1.53208
8155	Regions/em	823.064	1077.34	0		0.0350189	1.14033	0.924492	0.507661	1.3203	0.377027	1.66233
8156	Regions/em	833.064	1077.34	0		0.0402041	1.06166	1.0336	0.517135	1.17266	0.446749	1.86283
8157	Regions/em	843.064	1077.34	0		0.0394474	1.16046	1.00001	0.440657	1.66238	0.348182	1.77571
8158	Regions/em	853.064	1077.34	0		0.0377153	0.955334	1.11861	0.519369	1.36937	0.409404	2.03421
8159	Regions/em	863.064	1077.34	0		0.0332082	0.86424	1.14409	0.412641	1.47169	0.465578	1.46343
8160	Regions/em	873.064	1077.34	0		0.0249455	1.18584	0.902105	0.523529	1.32645	0.413715	1.96204
8161	Regions/em	883.064	1077.34	0		0.0257244	1.25086	0.942294	0.46758	1.30483	0.411867	1.80754
8162	Regions/em	893.064	1077.34	0		0.0311948	1.0535	1.00191	0.427466	1.20757	0.418786	2.2221
8163	Regions/em	903.064	1077.34	0		0.0297206	0.953729	0.992251	0.49083	1.53191	0.296977	1.67188
8164	Regions/em	913.064	1077.34	0		0.0325134	1.07809	0.988271	0.499937	1.25552	0.274371	1.30122
8165	Regions/em	923.064	1077.34	0		0.0312699	0.952581	1.07702	0.499518	1.41407	0.355986	1.50905
8166	Regions/em	933.064	1077.34	0		0.0339646	1.11292	0.858388	0.53746	1.21058	0.39761	1.59372
8167	Regions/em	943.064	1077.34	0		0.0334194	1.03645	0.949552	0.536796	1.18082	0.256363	1.16669
8168	Regions/em	953.064	1077.34	0		0.0305171	1.20205	0.915157	0.486759	1.2984	0.310937	1.64677
8169	Regions/em	963.064	1077.34	0		0.0331785	1.14249	0.842853	0.497	1.27085	0.368084	1.36281
8170	Regions/em	973.064	1077.34	0		0.0451026	0.948107	1.00121	0.496746	1.44349	0.459472	1.89381
8171	Regions/em	983.064	1077.34	0		0.0357333	1.00057	1.01733	0.477325	1.27547	0.370591	1.63159
8172	Regions/em	993.064	1077.34	0		0.0338622	0.923214	1.28912	0.576605	0.861294	0.517496	1.55348
8173	Regions/em	1003.06	1077.34	0		0.0288438	0.927622	0.998528	0.50931	1.15648	0.421143	1.41289
8174	Regions/em	1013.06	1077.34	0		0.0291525	0.999904	1.00707	0.401915	1.30113	0.360599	2.22592
8175	Regions/em	1023.06	1077.34	0		0.0241395	0.932875	1.20556	0.527765	1.0865	0.390371	1.48685
8176	Regions/em	1033.06	1077.34	0		0.0322544	0.903237	1.07205	0.40998	1.20279	0.396287	1.42
8177	Regions/em	1043.06	1077.34	0		0.0277543	1.0674	1.22971	0.424897	1.28821	0.493177	1.91915
8178	Regions/em	1053.06	1077.34	0		0.0280702	0.980597	1.27664	0.492437	1.08151	0.501261	1.77891
8179	Regions/em	1063.06	1077.34	0		0.0286404	0.887181	1.24421	0.475197	1.09769	0.49189	2.31218
8180	Regions/em	1073.06	1077.34	0		0.0287805	0.862869	1.24374	0.50465	1.04036	0.490376	1.99591
8181	Regions/em	1083.06	1077.34	0		0.0333254	0.917649	1.22443	0.518969	1.18525	0.433901	1.7824
8182	Regions/em	1093.06	1077.34	0		0.0387011	0.803774	1.16148	0.49839	1.109	0.423225	1.34198
8183	Regions/em	1103.06	1077.34	0		0.0458248	0.880805	1.2046	0.47163	1.12987	0.514209	1.81625
8184	Regions/em	1113.06	1077.34	0		0.0348204	0.764881	1.19024	0.572498	0.764573	0.566815	1.61579
8185	Regions/em	1123.06	1077.34	0		0.0363464	0.923665	1.22883	0.462333	0.975877	0.601	1.54152
8186	Regions/em	1133.06	1077.34	0		0.0358371	0.683171	1.24952	0.62012	0.608541	0.670237	1.27461
8187	Regions/em	1143.06	1077.34	0		0.0312752	0.657099	1.15843	0.539798	0.595107	0.372514	1.33457
8188	Regions/em	1153.06	1077.34	0		0.0263895	0.621644	1.43706	0.651318	0.554236	0.51649	0.963199
8189	Regions/em	1163.06	1077.34	0		0.0304882	0.536005	1.5216	0.633412	0.469269	0.544294	0.978385
8190	Regions/em	1173.06	1077.34	0		0.0324868	0.756494	1.21179	0.578058	0.534636	0.735573	1.97743
8191	Regions/em	1183.06	1077.34	0		0.0645013	0.619848	1.54113	0.568138	0.739014	0.497367	1.10226
8192	Regions/em	1193.06	1077.34	0		0.0559398	0.777406	1.10792	0.4958	0.838482	0.699354	1.45246
8193	Regions/em	1203.06	1077.34	0		0.0400016	0.768453	1.32531	0.628117	0.582166	0.492056	0.94364
8194	Regions/em	1213.06	1077.34	0		0.0582669	0.604471	1.53622	0.605798	0.716539	0.71509	1.49926
8195	Regions/em	1223.06	1077.34	0		0.0492249	0.628965	1.36961	0.617703	1.05457	0.490183	1.9098
8196	Regions/em	1233.06	1077.34	0		0.0667541	0.719877	1.23616	0.601876	0.84762	0.608691	2.0854
8197	Regions/em	1243.06	1077.34	0		0.0644203	0.569509	1.42497	0.7192	0.816977	0.598319	1.66247
8198	Regions/em	1253.06	1077.34	0		0.0475341	0.483292	1.5072	0.608483	0.933605	0.500136	2.04551
8199	Regions/em	1263.06	1077.34	0		0.0465769	0.462825	1.68919	0.670277	0.852604	0.551003	2.11348
8200	Regions/em	1273.06	1077.34	0		0.0513175	0.448971	1.61464	0.678953	0.89071	0.581491	2.18415
8201	Regions/em	1283.06	1077.34	0		0.0689855	0.442608	1.61284	0.778566	1.02894	0.450804	1.63804
8202	Regions/em	1293.06	1077.34	0		0.0365437	0.52222	2.12836	0.920022	0.590869	0.514715	1.93676
8203	Regions/em	1303.06	1077.34	0		0.0382253	0.379628	2.08643	0.736354	0.944981	0.571878	1.92365
8204	Regions/em	1313.06	1077.34	0		0.0430208	0.431181	1.9365	0.926242	0.854056	0.546622	1.55128
8205	Regions/em	1323.06	1077.34	0		0.0445892	0.335944	2.69507	0.921578	0.549093	0.813654	1.82993
8206	Regions/em	1333.06	1077.34	0		0.0468585	0.403057	2.57084	1.05561	0.610182	0.588859	1.76996
8207	Regions/em	1343.06	1077.34	0		0.0372411	0.345696	3.07303	0.96304	0.550546	0.590905	1.49021
8208	Regions/em	1353.06	1077.34	0		0.0350265	0.343325	3.07175	0.902541	0.538089	0.597284	1.11508
8209	Regions/em	1363.06	1077.34	0		0.04545	0.335689	2.96572	0.823616	0.659927	0.619238	1.6431
8210	Regions/em	1373.06	1077.34	0		0.0345403	0.354529	3.50647	0.724357	0.613326	0.665665	1.67032
8211	Regions/em	1383.06	1077.34	0		0.0392348	0.331112	2.81794	0.762657	0.588318	0.575386	1.29403
8212	Regions/em	1393.06	1077.34	0		0.0446152	0.326008	3.23668	0.741164	0.532962	0.594714	1.47653
8213	Regions/em	1403.06	1077.34	0		0.0520724	0.391309	3.45784	0.84793	0.387757	0.631047	1.28193
8214	Regions/em	1413.06	1077.34	0		0.0515492	0.483342	2.87097	0.81317	0.424918	0.479829	1.26197
8215	Regions/em	1423.06	1077.34	0		0.0651169	0.461024	3.17778	0.851616	0.385886	0.54388	1.39952
8216	Regions/em	1433.06	1077.34	0		0.0597152	0.48983	2.68281	0.948238	0.292541	0.666431	1.2005
8217	Regions/em	1443.06	1077.34	0		0.0625315	0.41693	3.42071	0.87272	0.276569	0.630248	1.00186
8218	Regions/em	1453.06	1077.34	0		0.0598811	0.443545	4.04328	0.827194	0.255234	0.670833	1.35417
8219	Regions/em	1463.06	1077.34	0		0.0583619	0.415713	3.58748	1.06681	0.241337	0.638478	1.22249
8220	Regions/em	1473.06	1077.34	0		0.060185	0.442021	2.90906	0.941515	0.232016	0.713597	1.22296
8221	Regions/em	1483.06	1077.34	0		0.0527203	0.323629	3.15184	1.00178	0.215333	0.752728	1.29578
8222	Regions/em	1493.06	1077.34	0		0.0451514	0.320874	3.48281	0.901973	0.205946	0.840191	1.34057
8223	Regions/em	1503.06	1077.34	0		0.0487349	0.398269	4.07229	1.0407	0.16206	0.929332	1.03668
8224	Regions/em	1513.06	1077.34	0		0.0521886	0.410891	2.97949	1.03288	0.1973	0.956145	1.25813
8225	Regions/em	1523.06	1077.34	0		0.0667904	0.339837	3.43809	1.01945	0.186669	0.979435	1.35087
8226	Regions/em	1533.06	1077.34	0		0.0691894	0.307928	3.86974	1.07679	0.192716	0.903351	1.45977
8227	Regions/em	1543.06	1077.34	0		0.0608521	0.366209	2.90399	1.07207	0.191271	0.793791	1.45338
8228	Regions/em	1553.06	1077.34	0		0.0628517	0.431979	3.15463	1.20327	0.194852	0.814693	1.21062
8321	Regions/em	413.064	1067.34	0		0.0379063	0.256909	3.21898	0.996166	0.266053	0.613498	1.17118
8322	Regions/em	423.064	1067.34	0		0.0333226	0.370951	3.38567	0.962001	0.251949	0.733227	1.3393
8323	Regions/em	433.064	1067.34	0		0.031498	0.312861	3.31077	0.923	0.278169	0.780542	1.18985
8324	Regions/em	443.064	1067.34	0		0.0414544	0.434776	2.81301	1.14	0.326719	0.379985	1.038
8325	Regions/em	453.064	1067.34	0		0.0647926	0.370777	3.08252	0.96922	0.336282	0.582204	1.30824
8326	Regions/em	463.064	1067.34	0		0.0556951	0.427893	2.9578	0.883413	0.331889	0.445008	1.09328
8327	Regions/em	473.064	1067.34	0		0.0415902	0.433595	3.19769	0.928101	0.335095	0.464236	1.99751
8328	Regions/em	483.064	1067.34	0		0.0398214	0.471548	2.63347	0.871122	0.378174	0.540791	1.29681
8329	Regions/em	493.064	1067.34	0		0.0612964	0.431383	2.88056	0.809646	0.384043	0.466471	1.25035
8330	Regions/em	503.064	1067.34	0		0.0703959	0.423849	2.69771	0.811215	0.492833	0.47706	0.904815
8331	Regions/em	513.064	1067.34	0		0.0636842	0.363111	3.31844	0.743803	0.50026	0.622828	1.03737
8332	Regions/em	523.064	1067.34	0		0.0457393	0.468191	2.4882	0.901862	0.430505	0.711592	1.1165
8333	Regions/em	533.064	1067.34	0		0.0376264	0.350037	2.58812	0.876903	0.59416	0.662711	1.29531
8334	Regions/em	543.064	1067.34	0		0.0310647	0.337411	2.86879	0.799	0.508542	0.779297	1.23968
8335	Regions/em	553.064	1067.34	0		0.0296737	0.393531	2.6293	0.904	0.642422	0.887903	1.6149
8336	Regions/em	563.064	1067.34	0		0.0413442	0.368421	2.90802	0.85615	0.691499	0.92208	1.82652
8337	Regions/em	573.064	1067.34	0		0.0398797	0.308406	2.58327	0.85	0.633365	0.82056	1.55105
8338	Regions/em	583.064	1067.34	0		0.0374519	0.294509	3.38551	0.874917	0.569181	0.828021	1.6062
8339	Regions/em	593.064	1067.34	0		0.0357888	0.318215	2.33041	0.824596	0.697487	0.813013	1.38945
8340	Regions/em	603.064	1067.34	0		0.031717	0.417247	2.11624	0.915322	0.606661	0.823484	1.70417
8341	Regions/em	613.064	1067.34	0		0.0521401	0.319145	2.59419	0.856711	0.773798	0.774374	1.2496
8342	Regions/em	623.064	1067.34	0		0.0377055	0.372848	2.15264	0.861919	0.818528	0.59813	1.27542
8343	Regions/em	633.064	1067.34	0		0.0360112	0.438138	2.2532	0.842391	1.04563	0.56944	1.63067
8344	Regions/em	643.064	1067.34	0		0.0494181	0.423561	2.00803	0.808006	1.02809	0.517405	2.17273
8345	Regions/em	653.064	1067.34	0		0.0534923	0.409305	1.80939	0.680082	0.916919	0.449013	1.53881
8346	Regions/em	663.064	1067.34	0		0.0616139	0.497728	1.8174	0.727351	1.45689	0.380951	1.78954
8347	Regions/em	673.064	1067.34	0		0.0578055	0.542578	1.69602	0.700026	1.39001	0.412819	2.11153
8348	Regions/em	683.064	1067.34	0		0.0547269	0.426366	1.62927	0.67005	1.39589	0.362795	1.35017
8349	Regions/em	693.064	1067.34	0		0.0356759	0.584449	1.26522	0.608054	1.09154	0.428533	1.34845
8350	Regions/em	703.064	1067.34	0		0.0394316	0.564417	1.46273	0.566562	1.11075	0.541582	1.59166
8351	Regions/em	713.064	1067.34	0		0.0385716	0.636079	1.32645	0.529621	1.11858	0.488336	1.4553
8352	Regions/em	723.064	1067.34	0		0.0329056	0.821761	1.37415	0.492241	1.12805	0.448645	1.22443
8353	Regions/em	733.064	1067.34	0		0.0266265	0.741253	1.27873	0.540895	1.14078	0.574169	1.94917
8354	Regions/em	743.064	1067.34	0		0.0256441	0.769867	1.37809	0.534134	1.18999	0.505456	2.02358
8355	Regions/em	753.064	1067.34	0		0.0270677	1.16054	0.898536	0.424	1.74502	0.408801	2.26314
8356	Regions/em	763.064	1067.34	0		0.0396313	0.87273	1.14765	0.460957	1.32389	0.496836	1.42673
8357	Regions/em	773.064	1067.34	0		0.0311599	0.902179	1.02842	0.484198	1.15819	0.587312	1.7829
8358	Regions/em	783.064	1067.34	0		0.0378273	0.889503	1.05671	0.597054	1.39584	0.455962	3.05264
8359	Regions/em	793.064	1067.34	0		0.0305167	1.27306	0.942317	0.474299	2.09214	0.398004	2.05552
8360	Regions/em	803.064	1067.34	0		0.0297886	0.878131	1.30329	0.519	1.34346	0.36106	1.62511
8361	Regions/em	813.064	1067.34	0		0.0302238	0.997312	1.10698	0.508961	1.34418	0.401792	1.86558
8362	Regions/em	823.064	1067.34	0		0.03579	0.786827	1.34748	0.481	1.25938	0.407729	2.03128
8363	Regions/em	833.064	1067.34	0		0.0260046	0.99138	1.07306	0.495	1.13699	0.462484	1.66894
8364	Regions/em	843.064	1067.34	0		0.0283446	1.1111	0.922553	0.450046	1.30402	0.485757	1.74299
8365	Regions/em	853.064	1067.34	0		0.028111	0.996109	1.14889	0.453518	1.16601	0.491253	1.78947
8366	Regions/em	863.064	1067.34	0		0.0386958	0.903472	1.06484	0.469033	1.19434	0.478483	2.39257
8367	Regions/em	873.064	1067.34	0		0.0348079	1.04815	0.898	0.372441	1.42731	0.433943	1.90064
[truncated: 10,336 more rows]

## Sheet: Figure 3 I-Q
spotId	raster	x	y	z	Date	GSSG/GSH	ADP/AMP	ATP/ADP	ATP/AMP	IDP/IMP	IMP/AMP	Oleic Acid C18H34O2 /Stearic Acid C18H36O2	Oleic Acid C18H34O2/Palmitate C16H32O2	Docosahexaenoic Acid C22H32O2/Arachidonic Acid C20H32O2
0	0	28641.7	9437.05	0		0.234452	0.77117	0.00645392	0.00497707	0.00641034	0.718158	1.1311	3.633	0.65538
1	0	28651.7	9437.05	0		0.0144751	0.768379	0.0102886	0.00790558	0.010376	0.704742	0.911279	2.12481	0.742045
2	0	28661.7	9437.05	0		0.0275969	0.580484	0.0175545	0.0101901	0.0153178	0.615333	1.01984	3.04093	0.83124
3	0	28671.7	9437.05	0		0.0202363	0.706285	0.012301	0.00868798	0.0126573	0.634901	0.939564	2.63918	0.657474
4	0	28681.7	9437.05	0		0.0254331	0.791795	0.182861	0.144789	0.0214101	0.547389	1.12099	2.56134	0.869626
5	0	28691.7	9437.05	0		0.0294301	0.694288	0.0151231	0.0104998	0.0216885	0.447796	0.887877	2.80818	0.822112
6	0	28701.7	9437.05	0		0.018391	0.603253	0.0132727	0.00800681	0.00943449	0.784998	1.01391	2.30689	0.752568
7	0	28711.7	9437.05	0		0.0174346	0.670435	0.0123151	0.00825647	0.0106416	0.717656	0.928904	1.86215	0.870284
8	0	28721.7	9437.05	0		0.258652	0.627072	0.0145104	0.00909904	0.0114751	0.733446	1.0209	2.73941	0.654685
9	0	28491.7	9427.05	0		0.17073	0.891062	0.164318	0.146418	0.00925545	0.764626	0.943795	2.07237	1.02428
10	0	28501.7	9427.05	0		0.163028	0.524736	0.0203308	0.0106683	0.0149923	0.658195	1.04751	1.72971	0.732338
11	0	28511.7	9427.05	0		0.0142041	0.530214	0.0166061	0.00880481	0.0115491	0.705181	1.16088	2.20495	0.898837
12	0	28521.7	9427.05	0		0.144936	0.53464	0.0144287	0.00771414	0.0083337	0.856204	0.89277	1.82777	0.590195
13	0	28531.7	9427.05	0		0.0254468	0.653241	0.0228771	0.0149443	0.021062	0.656302	1.03207	2.02422	0.803156
14	0	28541.7	9427.05	0		0.040629	0.942367	0.0259893	0.0244915	0.033618	0.673861	1.05681	2.84401	0.895993
15	0	28551.7	9427.05	0		0.237068	0.683608	0.0113283	0.00774414	0.00841969	0.850756	1.04181	2.01604	0.623486
16	0	28561.7	9427.05	0		0.29077	0.998353	0.0121497	0.0121297	0.00863588	1.29918	0.639329	15.8075	0.0917303
17	0	28571.7	9427.05	0		0.0581638	0.759335	0.0273251	0.0207489	0.036505	0.52574	0.801987	2.7225	0.521514
18	0	28581.7	9427.05	0		0.030597	0.288384	0.0417355	0.0120359	0.0134037	0.830577	1.50485	2.53171	0.575429
19	0	28591.7	9427.05	0		0.0282634	0.743281	0.018776	0.0139559	0.0141533	0.912067	1.00353	2.22214	0.665632
20	0	28601.7	9427.05	0		0.0289975	0.989661	0.0206225	0.0204093	0.0279498	0.675424	0.974759	2.63943	0.898221
21	0	28611.7	9427.05	0		0.181289	0.767016	0.0175433	0.013456	0.0165771	0.750819	1.10321	2.56267	0.775273
22	0	28621.7	9427.05	0		0.0330139	0.832395	0.0211641	0.0176169	0.0266948	0.610422	1.08277	3.08453	0.757452
23	0	28631.7	9427.05	0		0.0193481	0.81865	0.012105	0.00990977	0.157273	0.845111	1.10109	3.01563	0.846199
24	0	28641.7	9427.05	0		0.0201741	0.814918	0.0109939	0.00895911	0.00994179	0.833543	0.96473	3.91242	0.808651
25	0	28651.7	9427.05	0		0.0180281	0.718305	0.0127801	0.00917999	0.00971004	0.874478	0.903836	2.56425	0.663359
26	0	28661.7	9427.05	0		0.0171251	0.61348	0.135021	0.0828329	0.00650119	0.99835	0.750746	2.73874	0.618906
27	0	28671.7	9427.05	0		0.2985	0.496058	0.0180964	0.00897686	0.0175844	0.472199	0.927623	3.11478	0.931822
28	0	28681.7	9427.05	0		0.287396	0.546428	0.0162391	0.0088735	0.0126912	0.646724	0.898927	3.00714	0.709269
29	0	28691.7	9427.05	0		0.0240852	0.558497	0.181042	0.101111	0.0139802	0.695926	0.885217	2.54514	0.887589
30	0	28701.7	9427.05	0		0.242854	0.566673	0.0126555	0.00717151	0.00671106	0.988433	0.917433	2.75099	0.76818
31	0	28711.7	9427.05	0		0.0227935	0.630611	0.018161	0.0114525	0.00960041	1.10342	0.846612	2.66418	0.747671
32	0	28721.7	9427.05	0		0.028587	0.677037	0.0180826	0.0122426	0.015329	0.73873	0.938538	3.11039	0.863892
33	0	28731.7	9427.05	0		0.0543901	0.593979	0.0457168	0.0271548	0.0648492	0.38732	1.15497	2.59577	0.80418
34	0	28741.7	9427.05	0		0.0538641	0.401658	0.0613704	0.0246499	0.0573741	0.397399	1.37837	2.55068	0.778808
35	0	28751.7	9427.05	0		0.0251877	0.460628	0.0220505	0.0101571	0.0164343	0.571672	1.30328	2.20334	0.747198
36	0	28761.7	9427.05	0		0.169086	0.790221	0.121632	0.0961162	0.00955299	0.674689	1.29167	1.79275	0.103412
37	0	28771.7	9427.05	0		0.20599	0.915429	0.180992	0.165685	0.0135976	0.570815	0.91752	16.579	0.742045
38	0	28781.7	9427.05	0		0.213107	1.02717	0.0849714	0.0872799	0.0100714	0.639581	0.705844	2.41397	0.762809
39	0	28421.7	9417.05	0		0.0662811	0.525538	0.0452154	0.0237624	0.025098	0.875745	1.08997	2.01432	0.695823
40	0	28431.7	9417.05	0		0.0125949	0.769004	0.115329	0.0886884	0.00586446	1.02341	1.07462	2.06363	0.487032
41	0	28441.7	9417.05	0		0.0317999	0.892148	0.0153643	0.0137072	0.254497	0.864497	1.44127	2.01279	0.770716
42	0	28451.7	9417.05	0		0.022626	0.837984	0.0200461	0.0167983	0.0203537	0.763394	0.658252	3.44681	0.77822
43	0	28461.7	9417.05	0		0.0141516	0.93683	0.186699	0.174905	0.0144041	0.746597	1.00368	20.0824	0.112057
44	0	28471.7	9417.05	0		0.155357	0.930548	0.13528	0.125885	0.00995467	0.747752	1.09221	1.66075	0.933148
45	0	28481.7	9417.05	0		0.150488	1.20404	0.0805333	0.0969655	0.00785908	0.942296	1.38176	1.11302	0.771427
46	0	28491.7	9417.05	0		0.201923	0.948344	0.0925295	0.0877498	0.00606396	0.956935	0.693285	1.96038	1.44802
47	0	28501.7	9417.05	0		0.203262	1.01913	0.120997	0.123312	0.00568258	1.05811	0.859695	1.78858	5.57243
48	0	28511.7	9417.05	0		0.0141804	0.786843	0.011746	0.00924228	0.00856419	0.998206	1.25762	2.32809	0.875338
49	0	28521.7	9417.05	0		0.0102401	0.856731	0.201594	0.172712	0.00698895	1.06425	0.798665	2.15594	0.927497
50	0	28531.7	9417.05	0		0.0158013	0.735924	0.0145955	0.0107412	0.0115622	0.859293	0.797919	1.85658	0.663252
51	0	28541.7	9417.05	0		0.0323059	0.593555	0.0244681	0.0145232	0.0212424	0.63239	1.04335	2.35614	0.837474
52	0	28551.7	9417.05	0		0.0158431	0.683516	0.0135499	0.0092616	0.0108201	0.791738	0.923258	1.94027	0.960708
53	0	28561.7	9417.05	0		0.0276019	0.573204	0.0240635	0.0137933	0.0196239	0.650145	1.08394	1.87242	0.928126
54	0	28571.7	9417.05	0		0.0467756	0.520022	0.0399581	0.0207791	0.0502217	0.382704	1.12511	2.05418	0.818045
55	0	28581.7	9417.05	0		0.0244875	0.649218	0.0204052	0.0132474	0.0166496	0.735961	0.940239	2.08543	0.747157
56	0	28591.7	9417.05	0		0.266498	0.548517	0.0202221	0.0110922	0.0108742	0.943509	0.896585	3.44128	0.904459
57	0	28601.7	9417.05	0		0.0239413	0.731843	0.0154069	0.0112754	0.0113342	0.920173	0.993002	2.72002	0.906673
58	0	28611.7	9417.05	0		0.0263231	0.750616	0.0157226	0.0118017	0.00925937	1.17893	1.05857	2.69327	0.970954
59	0	28621.7	9417.05	0		0.0421164	0.6465	0.02872	0.0185675	0.0213953	0.802715	1.03594	2.86363	0.885799
60	0	28631.7	9417.05	0		0.400236	0.514301	0.0197069	0.0101353	0.00879655	1.06574	0.995508	2.8703	0.788787
61	0	28641.7	9417.05	0		0.032879	0.81909	0.0220086	0.018027	0.0321261	0.519032	1.00802	3.0445	0.672244
62	0	28651.7	9417.05	0		0.0307864	0.502256	0.0290546	0.0145928	0.0174038	0.775573	1.0457	2.51664	0.603543
63	0	28661.7	9417.05	0		0.0258887	0.439057	0.291139	0.127827	0.0099966	0.692282	0.942936	2.7416	0.746455
64	0	28671.7	9417.05	0		0.0252208	0.514959	0.0206495	0.0106336	0.0159664	0.616031	0.967838	2.75955	0.872365
65	0	28681.7	9417.05	0		0.0246327	0.53787	0.0158395	0.00851958	0.00796284	0.989641	0.997214	2.46883	0.786754
66	0	28691.7	9417.05	0		0.0378433	0.540176	0.33977	0.183536	0.0303078	0.51487	1.02108	2.65035	0.69939
67	0	28701.7	9417.05	0		0.0288011	0.638224	0.0182725	0.011662	0.011638	0.926873	0.991059	2.80346	0.773214
68	0	28711.7	9417.05	0		0.0653915	0.531863	0.0580511	0.0308753	0.0443352	0.644154	1.04479	2.62001	0.601048
69	0	28721.7	9417.05	0		0.0430565	0.386532	0.0388058	0.0149997	0.0238676	0.5813	1.01207	2.46192	0.711351
70	0	28731.7	9417.05	0		0.0375719	0.369216	0.0386392	0.0142662	0.0221699	0.595213	0.805239	3.05338	0.921471
71	0	28741.7	9417.05	0		0.0268058	0.433369	0.0213147	0.00923711	0.0123877	0.68972	0.994312	2.33554	0.607588
72	0	28751.7	9417.05	0		0.140171	0.583143	0.0114227	0.00666109	0.00932979	0.660391	0.870978	2.38547	0.561043
73	0	28761.7	9417.05	0		0.180044	0.575493	0.122039	0.0702326	0.0097086	0.509259	1.13951	1.5339	7.97424
74	0	28771.7	9417.05	0		0.147474	0.580297	0.0105959	0.00614878	0.00912164	0.62351	0.870842	2.42861	0.916574
75	0	28781.7	9417.05	0		0.187498	0.807505	0.00997103	0.00805165	0.00956811	0.778371	0.861457	1.80634	0.933149
76	0	28791.7	9417.05	0		0.179673	0.905954	0.0909975	0.0824396	0.00906617	0.687654	1.113	1.81064	1.10477
77	0	28801.7	9417.05	0		0.206523	0.416194	0.0153138	0.00637353	0.00986186	0.59779	0.836258	22.8489	0.677138
78	0	28811.7	9417.05	0		0.0269942	0.296903	0.0375115	0.0111373	0.0187847	0.548406	1.36961	2.41448	0.587883
79	0	28821.7	9417.05	0		0.585471	0.0670887	0.718835	0.0482257	0.0526994	0.846448	1.27469	2.39278	0.771745
80	0	28831.7	9417.05	0		0.071845	0.540495	0.0531088	0.0287051	0.071275	0.372519	1.14846	2.50965	0.724112
81	0	28371.7	9407.05	0		0.29264	0.99376	0.0156664	0.0155686	0.0244113	0.589912	1.14671	11.6432	0.133986
82	0	28381.7	9407.05	0		0.18869	1.1818	0.0903283	0.10675	0.0109986	0.702041	0.858145	1.84381	0.795253
83	0	28391.7	9407.05	0		0.183194	1.03775	0.160327	0.166378	0.00877342	0.861477	1.08088	1.99383	0.81846
84	0	28401.7	9407.05	0		0.0222397	0.568437	0.0190446	0.0108257	0.0104989	0.953756	0.913142	1.83057	0.864107
85	0	28411.7	9407.05	0		0.0622905	0.463616	0.0525581	0.0243668	0.0274163	0.822087	1.21609	2.02295	0.835752
86	0	28421.7	9407.05	0		0.068283	1.2117	0.0346893	0.0420332	0.037076	1.04864	1.25947	2.25738	0.73381
87	0	28431.7	9407.05	0		0.0393421	0.700869	0.0227178	0.0159222	0.0150533	0.978359	1.14325	2.43888	0.773911
88	0	28441.7	9407.05	0		0.585471	0.680393	0.0518026	0.0352461	0.0476723	0.683869	1.24819	2.135	0.857999
89	0	28451.7	9407.05	0		0.0185334	0.866039	0.0183545	0.0158957	0.0159425	0.922256	1.18393	2.02734	0.69016
90	0	28461.7	9407.05	0		0.210166	0.765906	0.015237	0.0116701	0.0137148	0.787067	4.49566	1.87091	1.02307
91	0	28471.7	9407.05	0		0.122903	0.771049	0.138681	0.10693	0.00910811	0.772627	1.17838	1.52282	1.00982
92	0	28481.7	9407.05	0		0.167906	0.676971	0.0106418	0.00720418	0.00734661	0.907036	0.812155	2.11908	0.731398
93	0	28491.7	9407.05	0		0.213495	0.736938	0.0128903	0.00949932	0.00756016	1.16222	0.803413	1.96658	0.989405
94	0	28501.7	9407.05	0		0.247152	0.743444	0.0178571	0.0132757	0.0112736	1.08924	0.944752	2.04033	1.00697
95	0	28511.7	9407.05	0		0.0284811	0.593739	0.0201446	0.0119606	0.00974958	1.13474	1.14274	1.8317	0.80322
96	0	28521.7	9407.05	0		0.0140237	0.825391	0.0134629	0.0111122	0.153718	1.30907	1.06407	1.82838	0.648267
97	0	28531.7	9407.05	0		0.0145202	0.666282	0.0134466	0.00895921	0.0109493	0.756854	0.639786	1.64887	0.674259
98	0	28541.7	9407.05	0		0.011447	0.591002	0.0120228	0.00710548	0.00754146	0.871495	0.874393	2.01869	0.96896
99	0	28551.7	9407.05	0		0.197765	0.583791	0.0110268	0.00643733	0.00909506	0.654678	0.876537	1.70612	0.519297
100	0	28561.7	9407.05	0		0.00803319	0.738988	0.00859803	0.00635385	0.0070415	0.83464	0.978354	1.88703	0.0786659
101	0	28571.7	9407.05	0		0.010572	0.606699	0.0118864	0.00721147	0.00804795	0.828831	0.745097	2.37162	1.06797
102	0	28581.7	9407.05	0		0.0339433	0.0261959	0.718835	0.0188305	0.0193584	0.899748	1.04485	1.85408	0.898877
103	0	28591.7	9407.05	0		0.0326775	0.55989	0.0270715	0.015157	0.0155278	0.902885	0.828649	2.68745	0.693145
104	0	28601.7	9407.05	0		0.0135841	0.573523	0.0104655	0.00600218	0.00454205	1.22232	0.665617	2.90647	0.593154
105	0	28611.7	9407.05	0		0.0188272	0.664186	0.0123698	0.00821587	0.00654973	1.16027	0.917213	2.25341	0.63994
106	0	28621.7	9407.05	0		0.0261876	0.526367	0.0237993	0.0125272	0.0154107	0.751898	0.992844	2.37543	0.817003
107	0	28631.7	9407.05	0		0.0320791	0.468364	0.0306315	0.0143467	0.015787	0.840581	1.15584	2.69402	0.858562
108	0	28641.7	9407.05	0		0.03993	0.48402	0.039371	0.0190564	0.0398597	0.442215	1.08686	3.07668	0.823782
109	0	28651.7	9407.05	0		0.051012	0.376339	0.0496697	0.0186927	0.0253045	0.683283	1.20433	2.54964	0.616715
110	0	28661.7	9407.05	0		0.219408	0.406492	0.0178618	0.00726066	0.00966463	0.694894	1.03579	2.87182	0.814409
111	0	28671.7	9407.05	0		0.139516	0.652574	0.00964824	0.00629619	0.00566516	1.028	0.865016	1.58973	0.688311
112	0	28681.7	9407.05	0		0.172028	0.592455	0.00894481	0.0052994	0.0048564	1.00934	0.844428	2.29548	0.921537
113	0	28691.7	9407.05	0		0.0162313	0.612808	0.0115296	0.00706542	0.0054201	1.20575	0.94246	2.53882	0.649759
114	0	28701.7	9407.05	0		0.0287601	0.751777	0.0202969	0.0152587	0.0155727	0.906321	1.01962	2.57615	0.727194
115	0	28711.7	9407.05	0		0.0529275	0.465339	0.0525184	0.0244388	0.0563691	0.401021	1.0536	2.34533	0.821288
116	0	28721.7	9407.05	0		0.0610738	0.563855	0.0412697	0.0232701	0.045652	0.471483	0.998774	2.51369	0.813007
117	0	28731.7	9407.05	0		0.0346795	0.444991	0.0296811	0.0132078	0.0145668	0.838674	1.18902	2.58632	0.857104
118	0	28741.7	9407.05	0		0.0359295	0.414643	0.0334873	0.0138853	0.0324752	0.395485	1.06749	2.71055	0.770157
119	0	28751.7	9407.05	0		0.191779	0.406561	0.0187975	0.00764231	0.00996023	0.709713	1.03972	2.23887	0.715625
120	0	28761.7	9407.05	0		0.175137	0.729699	0.00766305	0.00559172	0.00702855	0.73588	1.13296	1.67734	0.148409
121	0	28771.7	9407.05	0		0.150087	0.540239	0.0113369	0.00612466	0.00923475	0.613457	1.06258	2.21372	0.71776
122	0	28781.7	9407.05	0		0.201431	0.708861	0.00841246	0.00596326	0.00752374	0.733125	1.20592	2.58534	1.39016
123	0	28791.7	9407.05	0		0.14826	0.785195	0.0105635	0.00829441	0.0114692	0.668927	1.088	1.8994	0.607257
124	0	28801.7	9407.05	0		0.135912	0.658211	0.0106828	0.00703151	0.00954798	0.681185	0.963838	3.07953	1.12646
125	0	28811.7	9407.05	0		0.0429698	0.489639	0.0330722	0.0161934	0.0237842	0.629765	1.37226	2.15004	0.585784
126	0	28821.7	9407.05	0		0.0552888	0.511011	0.056084	0.0286595	0.0529587	0.500563	1.40272	2.22511	0.816234
127	0	28831.7	9407.05	0		0.0581604	0.939295	0.0455775	0.0428107	0.373367	0.106058	1.21318	2.2254	0.781965
128	0	28841.7	9407.05	0		0.0686615	0.272225	0.082695	0.0225116	0.0437546	0.475894	1.07909	2.38125	0.798602
129	0	28851.7	9407.05	0		0.0176734	0.49255	0.0166384	0.00819522	0.00833957	0.90896	1.11343	2.09327	0.80309
130	0	28861.7	9407.05	0		0.144014	0.682051	0.122863	0.0837986	0.00787065	0.894256	1.16248	1.71866	1.17103
131	0	28871.7	9407.05	0		0.169794	1.02679	0.00680048	0.00698268	0.0086468	0.746956	0.824043	18.6572	1.57107
132	0	28881.7	9407.05	0		0.231842	0.998815	0.00743957	0.00743075	0.0104066	0.660467	0.986781	1.46965	0.85656
133	0	28891.7	9407.05	0		0.185166	0.940494	0.107317	0.100931	0.00868099	0.753361	1.14259	1.27596	0.925326
134	0	28901.7	9407.05	0		0.178348	1.11666	0.119119	0.133015	0.00785387	0.732342	0.812598	2.66951	0.770016
135	0	28911.7	9407.05	0		0.309057	1.27236	0.00998143	0.0127	0.0156164	0.752227	6.45138	1.87091	0.742045
136	0	28921.7	9407.05	0		0.0160667	1.31226	0.194547	0.255297	0.0163286	0.678069	1.11295	14.5575	0.889442
137	0	28931.7	9407.05	0		0.0191721	0.778876	0.0144535	0.0112575	0.0144649	0.719866	1.3019	9.85812	0.742045
138	0	28941.7	9407.05	0		0.01875	0.742952	0.0155603	0.0115605	0.0131149	0.815342	1.04687	1.91454	0.770704
139	0	28341.7	9397.05	0		0.256795	1.00074	0.135261	0.135361	0.0100525	0.776847	0.660436	1.75483	0.123639
140	0	28351.7	9397.05	0		0.253841	0.88984	0.0103757	0.00923273	0.0117631	0.725997	0.869499	1.77221	0.822861
141	0	28361.7	9397.05	0		0.17057	0.868469	0.0119268	0.0103581	0.012608	0.759909	0.654645	1.78935	0.800481
142	0	28371.7	9397.05	0		0.233351	0.833007	0.0130919	0.0109056	0.0122953	0.820424	0.596186	2.03331	1.21821
143	0	28381.7	9397.05	0		0.207323	1.031	0.0102367	0.0105541	0.0149155	0.654502	0.977659	2.20002	0.704765
144	0	28391.7	9397.05	0		0.150238	0.725744	0.0112464	0.00816203	0.0109417	0.689988	0.763481	1.95882	0.70501
145	0	28401.7	9397.05	0		0.231453	0.496393	0.0193364	0.00959848	0.0152287	0.583	1.0328	1.66704	0.884475
146	0	28411.7	9397.05	0		0.0279193	0.488513	0.0245378	0.0119871	0.0132492	0.836853	1.08282	1.69268	0.868708
147	0	28421.7	9397.05	0		0.0299338	0.537601	0.0328705	0.0176712	0.0179025	0.913024	0.928136	1.92265	0.890683
148	0	28431.7	9397.05	0		0.057961	0.643864	0.0459925	0.0296129	0.036797	0.744382	0.959216	2.21741	0.868982
149	0	28441.7	9397.05	0		0.0560008	0.667763	0.0357529	0.0238744	0.0228717	0.965522	0.816422	2.22325	0.903869
150	0	28451.7	9397.05	0		0.0111122	0.546887	0.0155244	0.00849008	0.00731066	1.07419	0.782809	2.39086	0.808301
151	0	28461.7	9397.05	0		0.0140942	0.677753	0.0149257	0.0101159	0.0101605	0.920915	0.573653	2.13585	0.634462
152	0	28471.7	9397.05	0		0.0165491	0.509764	0.0185368	0.00944937	0.00905862	0.964869	0.899451	1.67014	0.845275
153	0	28481.7	9397.05	0		0.0311557	0.556574	0.0252014	0.0140264	0.0131616	0.985752	0.677699	2.13934	0.917472
154	0	28491.7	9397.05	0		0.0498705	0.452956	0.0410698	0.0186028	0.0237337	0.725006	0.809509	2.01074	0.932024
155	0	28501.7	9397.05	0		0.0651596	0.349237	0.0660036	0.0230509	0.0292339	0.729339	0.924995	1.83701	0.886818
156	0	28511.7	9397.05	0		0.0377409	0.330357	0.0492685	0.0162762	0.0193327	0.778733	0.925543	2.33029	0.978545
157	0	28521.7	9397.05	0		0.0112858	0.548051	0.0122891	0.00673502	0.00565487	1.10165	0.98916	1.55056	0.999617
158	0	28531.7	9397.05	0		0.219024	0.393705	0.0221047	0.00870271	0.0107981	0.745476	0.680895	2.20908	0.820786
159	0	28541.7	9397.05	0		0.049581	0.55113	0.0360049	0.0198434	0.0269361	0.681411	0.878718	2.16663	1.04446
160	0	28551.7	9397.05	0		0.0289593	0.495605	0.0299524	0.0148445	0.0234611	0.585256	0.730157	1.76805	0.940851
161	0	28561.7	9397.05	0		0.15017	0.728343	0.10098	0.0735482	0.0049291	0.775084	0.82559	2.41796	1.21822
162	0	28571.7	9397.05	0		0.152392	0.721774	0.00663742	0.00479072	0.00490867	0.902744	0.615898	2.23271	0.701796
163	0	28581.7	9397.05	0		0.00869954	0.521305	0.0136134	0.00709674	0.00722865	0.908091	0.730599	3.21817	1.22635
164	0	28591.7	9397.05	0		0.0141686	0.433342	0.0212706	0.00921746	0.00832766	1.0238	0.636998	2.11901	1.02376
165	0	28601.7	9397.05	0		0.0159964	0.577306	0.0187893	0.0108472	0.0118539	0.846413	0.761062	2.24672	1.09423
166	0	28611.7	9397.05	0		0.0175907	0.565641	0.162736	0.0920502	0.00947782	0.936051	0.868378	2.092	1.09388
167	0	28621.7	9397.05	0		0.0248598	0.380462	0.028047	0.0106708	0.0102353	0.96433	0.86823	2.3081	1.08111
168	0	28631.7	9397.05	0		0.0326742	0.399462	0.0300037	0.0119853	0.0120238	0.922011	1.15443	2.28793	0.95637
169	0	28641.7	9397.05	0		0.0236126	0.598229	0.0257391	0.0153979	0.0207859	0.685205	1.01255	2.67909	0.884456
170	0	28651.7	9397.05	0		0.0300839	0.393303	0.0277782	0.0109253	0.0105605	0.956919	1.04977	2.47205	0.745468
171	0	28661.7	9397.05	0		0.0190956	0.441068	0.0171618	0.00756953	0.00660712	1.0597	0.824363	1.82415	0.81221
172	0	28671.7	9397.05	0		0.0217217	0.480599	0.0209949	0.0100901	0.00814422	1.14598	0.80975	2.03652	1.15991
173	0	28681.7	9397.05	0		0.022172	0.726384	0.0180078	0.0130806	0.0102858	1.1763	0.714019	2.17347	0.944586
174	0	28691.7	9397.05	0		0.0164009	0.704897	0.0120972	0.00852727	0.0062235	1.26737	0.610172	3.41122	0.794453
175	0	28701.7	9397.05	0		0.0324031	0.456547	0.0363498	0.0165954	0.0197913	0.775605	0.67742	3.03673	0.786698
176	0	28711.7	9397.05	0		0.0466142	0.299372	0.0653774	0.0195721	0.0153793	1.17714	0.84312	3.02557	0.872161
177	0	28721.7	9397.05	0		0.0389594	0.398659	0.0431576	0.0172051	0.0281162	0.566016	0.7929	2.6102	0.825231
178	0	28731.7	9397.05	0		0.0234041	0.41383	0.028351	0.0117325	0.0120804	0.89833	0.785565	2.56197	0.905466
179	0	28741.7	9397.05	0		0.0266214	0.614792	0.0194372	0.0119498	0.0108102	1.02248	1.13181	2.36752	0.566207
180	0	28751.7	9397.05	0		0.0318894	0.399178	0.0377036	0.0150504	0.0252627	0.551057	0.984149	2.00668	0.686235
181	0	28761.7	9397.05	0		0.209689	0.525685	0.170068	0.0894023	0.00864393	0.877337	0.956679	1.77647	0.596433
182	0	28771.7	9397.05	0		0.137587	0.563396	0.0135837	0.00765301	0.00833779	0.849002	0.661093	1.92514	0.762456
183	0	28781.7	9397.05	0		0.164044	0.509204	0.0179622	0.00914641	0.0124537	0.679326	0.89227	1.61037	1.2909
184	0	28791.7	9397.05	0		0.032129	0.402417	0.0321302	0.0129297	0.023517	0.508551	1.03958	1.70984	0.929793
185	0	28801.7	9397.05	0		0.161848	0.672149	0.14617	0.0982477	0.00732957	0.880885	0.978565	2.1047	0.750136
186	0	28811.7	9397.05	0		0.0157019	0.89226	0.014346	0.0128003	0.008615	1.37434	0.735505	2.76608	0.797755
187	0	28821.7	9397.05	0		0.0305555	0.715886	0.0285953	0.020471	0.019902	0.951413	1.17023	2.39184	0.80354
188	0	28831.7	9397.05	0		0.585471	0.418377	0.0775649	0.0324514	0.0494834	0.606599	1.36826	2.05272	0.74954
189	0	28841.7	9397.05	0		0.585471	0.414703	0.0632189	0.0262171	0.0442044	0.548588	1.25088	1.95955	0.881417
190	0	28851.7	9397.05	0		0.0231368	0.310752	0.0255454	0.00793828	0.0103849	0.707055	0.995623	2.43209	0.890021
191	0	28861.7	9397.05	0		0.169864	0.925651	0.00643664	0.00595809	0.00606085	0.909286	1.17678	2.88405	0.667068
192	0	28871.7	9397.05	0		0.00994914	1.22955	0.0973064	0.119643	0.0106853	0.765515	0.891544	2.27518	0.742045
193	0	28881.7	9397.05	0		0.213487	0.844732	0.148638	0.125559	0.00721105	0.820092	0.879714	2.70774	0.875482
194	0	28891.7	9397.05	0		0.115957	0.907108	0.00637758	0.00578516	0.0073417	0.728864	1.00267	2.87003	0.557801
195	0	28901.7	9397.05	0		0.128918	1.05851	0.00727334	0.00769891	0.141556	0.668921	0.846932	2.04243	0.742045
196	0	28911.7	9397.05	0		0.0103054	1.21029	0.163987	0.198472	0.00927735	0.967295	1.07616	1.83709	0.582659
197	0	28921.7	9397.05	0		0.196283	1.04426	0.129423	0.135151	0.010973	0.725883	1.07528	2.50406	1.28057
198	0	28931.7	9397.05	0		0.0159811	0.702543	0.0133807	0.00940054	0.0114088	0.762151	0.627632	24.7044	0.787156
199	0	28941.7	9397.05	0		0.00914341	0.733567	0.00702949	0.0051566	0.0047882	0.996136	1.14108	2.00339	0.0719711
200	0	28951.7	9397.05	0		0.219589	0.778793	0.00797644	0.00621199	0.0060448	0.950554	1.14319	2.00166	0.0637923
201	0	28961.7	9397.05	0		0.178823	0.719449	0.11095	0.0798229	0.00499259	1.02173	1.01795	2.19415	0.662621
202	0	28971.7	9397.05	0		0.0128255	0.930672	0.00866919	0.00806817	0.0077103	0.967902	1.04164	1.86891	0.9643
203	0	28981.7	9397.05	0		0.026603	0.546168	0.0239498	0.0130806	0.016914	0.715336	1.02936	1.67121	0.683689
204	0	28991.7	9397.05	0		0.240606	0.909884	0.0123283	0.0112173	0.0107915	0.961466	1.20204	2.22623	0.432961
205	0	29001.7	9397.05	0		0.193045	0.853695	0.0119849	0.0102315	0.0136564	0.692992	0.839011	1.61534	1.00321
206	0	29011.7	9397.05	0		0.25009	0.936527	0.00630377	0.00590365	0.00835723	0.65341	0.793864	2.02619	0.941155
207	0	29021.7	9397.05	0		0.196758	0.747762	0.0854827	0.0639208	0.00793675	0.575575	0.857765	2.62669	0.669089
208	0	28291.7	9387.05	0		0.0343044	0.445538	0.0449468	0.0200255	0.0253332	0.731174	1.19948	1.1535	0.745386
209	0	28301.7	9387.05	0		0.0353028	0.453245	0.0437283	0.0198197	0.0175626	1.04384	0.881604	1.87973	0.943879
210	0	28311.7	9387.05	0		0.0497657	0.590943	0.0378415	0.0223622	0.0167137	1.23757	1.02439	1.82774	1.05725
211	0	28321.7	9387.05	0		0.258767	0.769335	0.0144401	0.0111092	0.00885946	1.15986	0.88435	1.72805	0.899323
212	0	28331.7	9387.05	0		0.222798	0.788208	0.0121864	0.00960546	0.00945603	0.939586	0.977957	1.77576	1.24857
213	0	28341.7	9387.05	0		0.182135	0.739205	0.167293	0.123664	0.0147676	0.677443	0.50848	3.09809	0.887642
214	0	28351.7	9387.05	0		0.158438	0.905926	0.0126599	0.011469	0.0134179	0.790618	0.771765	1.62429	0.608125
215	0	28361.7	9387.05	0		0.182105	0.944995	0.0114106	0.010783	0.0158131	0.630742	0.610579	2.19396	1.60756
216	0	28371.7	9387.05	0		0.151549	0.75329	0.144676	0.108983	0.00993376	0.699876	0.93389	1.60415	1.03401
217	0	28381.7	9387.05	0		0.157738	0.965666	0.0097131	0.00937961	0.0103417	0.838923	0.761457	2.9144	1.1091
218	0	28391.7	9387.05	0		0.146073	0.80361	0.0127343	0.0102334	0.0114008	0.83026	0.861248	1.85859	1.47116
219	0	28401.7	9387.05	0		0.173719	0.517617	0.0254691	0.0131832	0.018339	0.664926	0.787836	1.45122	1.11971
220	0	28411.7	9387.05	0		0.156045	0.426809	0.0190944	0.00814968	0.00851398	0.885392	0.641426	1.80431	1.0404
221	0	28421.7	9387.05	0		0.0274355	0.471668	0.0203358	0.00959176	0.00947406	0.936461	0.662726	1.888	1.07695
222	0	28431.7	9387.05	0		0.0260928	0.243435	0.054803	0.013341	0.0148166	0.832851	0.802173	2.04777	1.12405
223	0	28441.7	9387.05	0		0.368207	0.346637	0.0405759	0.0140651	0.015062	0.863753	0.667224	2.54813	1.09009
224	0	28451.7	9387.05	0		0.0205046	0.504509	0.0224694	0.011336	0.0126658	0.827856	0.652092	2.05132	1.08003
225	0	28461.7	9387.05	0		0.0297355	0.35644	0.034089	0.0121507	0.0137311	0.818508	0.716891	1.64253	1.20465
226	0	28471.7	9387.05	0		0.170055	0.613643	0.0152337	0.00934805	0.0093518	0.924599	0.824599	1.59522	0.878306
227	0	28481.7	9387.05	0		0.207153	0.652531	0.0100256	0.00654202	0.00670047	0.903097	0.691947	1.90706	0.754827
228	0	28491.7	9387.05	0		0.0254559	0.39304	0.0308826	0.0121381	0.0119268	0.94136	0.738576	2.07112	1.10764
229	0	28501.7	9387.05	0		0.0145434	0.595469	0.0128342	0.00764239	0.0063265	1.11736	0.581001	2.86915	1.06522
230	0	28511.7	9387.05	0		0.205341	0.681275	0.0125791	0.00856981	0.00848972	0.933696	0.71089	2.79584	11.9982
231	0	28521.7	9387.05	0		0.0111509	0.707138	0.0114857	0.00812196	0.00926963	0.81045	0.714101	1.82266	0.854917
232	0	28531.7	9387.05	0		0.353483	0.281016	0.0422337	0.0118683	0.0132306	0.829732	0.707436	2.18417	1.23557
233	0	28541.7	9387.05	0		0.338136	0.35287	0.0434872	0.0153453	0.0187518	0.756939	0.683252	1.86813	1.11649
234	0	28551.7	9387.05	0		0.206004	0.609844	0.113945	0.0694885	0.00759911	0.702766	0.639507	1.9725	1.14429
235	0	28561.7	9387.05	0		0.207876	0.797414	0.159861	0.127476	0.00632515	0.847569	0.685956	2.49752	0.856418
236	0	28571.7	9387.05	0		0.206955	0.69062	0.0100564	0.00694515	0.00749522	0.857087	0.684243	3.18479	1.06945
237	0	28581.7	9387.05	0		0.0186731	0.44178	0.0222511	0.00983009	0.0108163	0.840631	0.07887	14.4344	0.893966
238	0	28591.7	9387.05	0		0.00782221	0.363951	0.0137518	0.00500499	0.0682745	0.943068	0.516596	2.23366	1.19364
239	0	28601.7	9387.05	0		0.0122453	0.54242	0.0122368	0.00663747	0.0706146	1.20028	0.56954	2.22384	1.14372
240	0	28611.7	9387.05	0		0.0163132	0.375839	0.020125	0.00756374	0.00548905	1.27458	0.585557	2.02496	0.886438
241	0	28621.7	9387.05	0		0.0257785	0.356803	0.033134	0.0118223	0.00959323	1.1399	0.649409	1.96156	1.09806
242	0	28631.7	9387.05	0		0.0342188	0.465409	0.0416471	0.0193829	0.0149474	1.19945	0.67983	2.18476	1.22942
243	0	28641.7	9387.05	0		0.310772	0.382163	0.020424	0.00780531	0.00685845	1.05267	0.859356	2.21233	0.986049
244	0	28651.7	9387.05	0		0.0273401	0.304134	0.0396157	0.0120485	0.0108238	1.02963	0.776082	2.07878	0.791759
245	0	28661.7	9387.05	0		0.258916	0.585049	0.0222668	0.0130272	0.0132725	0.907871	0.648843	2.28254	1.08649
246	0	28671.7	9387.05	0		0.0403328	0.51631	0.0481329	0.0248515	0.0311265	0.7385	0.704822	2.68843	1.08155
247	0	28681.7	9387.05	0		0.0333969	0.717422	0.0290832	0.0208649	0.0248755	0.77584	0.711603	2.16664	1.02048
248	0	28691.7	9387.05	0		0.0321744	0.607951	0.028904	0.0175722	0.0173546	0.936565	0.650421	2.9933	1.05885
249	0	28701.7	9387.05	0		0.0196055	0.670635	0.0201471	0.0135114	0.152006	0.968215	0.576365	2.93052	1.02496
250	0	28711.7	9387.05	0		0.0348579	0.491671	0.0373942	0.0183857	0.0213307	0.797263	0.656068	2.52024	1.0246
251	0	28721.7	9387.05	0		0.0295436	0.425675	0.035158	0.0149659	0.189466	0.518917	0.763547	2.16366	1.05097
252	0	28731.7	9387.05	0		0.0226535	0.345451	0.0264996	0.00915432	0.0105599	0.801852	0.721936	2.13186	0.815907
253	0	28741.7	9387.05	0		0.0179397	0.282738	0.0242158	0.00684672	0.084981	1.11874	0.726633	2.52643	0.791107
254	0	28751.7	9387.05	0		0.19656	0.494439	0.0133403	0.00659598	0.006417	0.950769	0.824602	1.91618	0.859951
255	0	28761.7	9387.05	0		0.167697	0.557994	0.093881	0.052385	0.00502369	0.899921	0.868599	1.83616	0.936245
256	0	28771.7	9387.05	0		0.00924425	0.538081	0.0116919	0.00629119	0.00750869	0.774991	0.915922	1.95874	0.96214
257	0	28781.7	9387.05	0		0.165111	0.732959	0.0108916	0.00798307	0.00654208	1.12871	1.23268	1.19207	0.969843
258	0	28791.7	9387.05	0		0.0307469	0.301292	0.0442814	0.0133416	0.0183967	0.670807	0.895386	2.34258	0.92652
259	0	28801.7	9387.05	0		0.0269118	0.554057	0.0219303	0.0121506	0.0151278	0.742931	0.813952	1.93655	0.853462
260	0	28811.7	9387.05	0		0.0174786	0.699934	0.241032	0.168707	0.0100794	0.917643	0.881353	1.85335	0.725287
261	0	28821.7	9387.05	0		0.0477134	0.299426	0.0679393	0.0203428	0.0274032	0.686654	0.83626	2.71112	0.844731
262	0	28831.7	9387.05	0		0.0674548	0.452437	0.0493508	0.0223281	0.0252441	0.818126	0.994839	1.68049	0.832219
263	0	28841.7	9387.05	0		0.0554176	0.257894	0.0817158	0.0210741	0.0285221	0.68343	1.1205	1.96253	0.840224
264	0	28851.7	9387.05	0		0.0386381	0.373476	0.0354684	0.0132466	0.0177165	0.691597	1.05262	1.66356	0.767098
265	0	28861.7	9387.05	0		0.230584	0.560202	0.0121615	0.00681291	0.00900466	0.699831	0.833543	1.95751	0.56387
266	0	28871.7	9387.05	0		0.192249	0.844466	0.00835553	0.00705596	0.008217	0.794274	0.888187	2.4547	0.900531
267	0	28881.7	9387.05	0		0.270093	0.608198	0.0149541	0.00909503	0.01135	0.741198	1.10261	1.69299	0.939179
268	0	28891.7	9387.05	0		0.0164346	0.697482	0.0150795	0.0105177	0.0159297	0.610714	0.866122	2.42989	0.65061
269	0	28901.7	9387.05	0		0.0127474	1.26312	0.00873466	0.011033	0.00929115	1.09837	0.756414	1.70157	0.742045
270	0	28911.7	9387.05	0		0.171429	0.999154	0.0093296	0.0093217	0.008853	0.973941	0.948501	1.43649	0.676498
271	0	28921.7	9387.05	0		0.145345	0.650367	0.0111398	0.00724498	0.00911932	0.734856	0.844684	2.123	0.427326
272	0	28931.7	9387.05	0		0.183272	0.731978	0.00915209	0.00669913	0.00879932	0.704201	0.831359	2.84087	0.704895
273	0	28941.7	9387.05	0		0.182174	0.875233	0.11273	0.0986648	0.00786007	0.80775	1.0775	2.17916	0.0808446
274	0	28951.7	9387.05	0		0.0117408	0.850962	0.0107007	0.00910587	0.00918074	0.917427	0.975747	3.24802	0.755574
275	0	28961.7	9387.05	0		0.139003	1.13089	0.00675742	0.00764187	0.00751913	0.940068	1.03758	3.26813	0.124391
276	0	28971.7	9387.05	0		0.168728	0.745637	0.00941782	0.00702228	0.00738695	0.879308	0.898286	2.45874	0.698451
277	0	28981.7	9387.05	0		0.025953	0.404284	0.0247823	0.0100191	0.0132266	0.700658	1.06376	1.92814	0.732158
278	0	28991.7	9387.05	0		0.0675904	0.286687	0.0655193	0.0187835	0.0199626	0.870338	1.11423	1.73581	0.651705
279	0	29001.7	9387.05	0		0.0338963	0.594199	0.0218465	0.0129811	0.013018	0.92235	1.07562	2.302	0.670852
280	0	29011.7	9387.05	0		0.209307	0.653525	0.0131508	0.00859437	0.0119118	0.667364	1.08574	1.83243	0.815053
281	0	29021.7	9387.05	0		0.141428	0.804537	0.0584237	0.047004	0.00746603	0.669133	1.01362	2.54958	0.98522
282	0	29031.7	9387.05	0		0.138421	0.856499	0.062107	0.0531945	0.00784905	0.590169	0.816127	2.84486	0.826324
283	0	29041.7	9387.05	0		0.157282	0.926565	0.068351	0.0633317	0.00647244	0.784836	0.922077	2.08154	0.894128
284	0	29051.7	9387.05	0		0.0139551	0.856075	0.184715	0.15813	0.00966942	0.862432	1.0414	2.54443	0.458343
285	0	28251.7	9377.05	0		0.0119428	0.784258	0.1165	0.0913657	0.00956308	0.770186	0.925135	2.08805	0.882939
286	0	28261.7	9377.05	0		0.17581	0.947744	0.00647086	0.00613272	0.00677713	0.837018	1.02601	2.79523	0.778948
287	0	28271.7	9377.05	0		0.173747	0.68072	0.0118634	0.00807566	0.00874266	0.854402	0.789655	1.65966	0.736435
288	0	28281.7	9377.05	0		0.0218394	0.551189	0.0225989	0.0124563	0.0139262	0.827336	0.97059	1.97167	0.901184
289	0	28291.7	9377.05	0		0.0454754	0.467567	0.0500998	0.023425	0.0214646	1.00945	0.958853	1.97163	1.04788
290	0	28301.7	9377.05	0		0.0648212	0.217925	0.0884272	0.0192705	0.0179353	0.993833	0.732865	2.10316	1.11864
291	0	28311.7	9377.05	0		0.0503111	0.314267	0.0569096	0.0178848	0.0150988	1.09564	0.807561	1.97958	1.05635
292	0	28321.7	9377.05	0		0.0349493	0.241257	0.0681969	0.016453	0.0152868	0.995533	0.852619	1.63895	1.42074
293	0	28331.7	9377.05	0		0.115226	0.562337	0.0154246	0.00867382	0.00916141	0.875742	1.01551	1.27086	1.09075
294	0	28341.7	9377.05	0		0.207331	0.735839	0.01009	0.00742464	0.00887774	0.773572	0.671673	2.43983	1.27671
295	0	28351.7	9377.05	0		0.228766	0.672326	0.0138412	0.00930582	0.00982868	0.875764	0.681272	2.27664	1.02273
296	0	28361.7	9377.05	0		0.224818	0.487451	0.0168124	0.00819521	0.0100295	0.755801	0.730789	1.62173	1.12883
297	0	28371.7	9377.05	0		0.187717	0.472215	0.0185429	0.00875622	0.0101152	0.800702	0.69121	1.74358	0.888787
298	0	28381.7	9377.05	0		0.14561	0.588233	0.0168841	0.00993177	0.0121523	0.755957	0.6961	1.8316	1.19706
299	0	28391.7	9377.05	0		0.190682	0.814453	0.0106542	0.00867737	0.0106947	0.750491	0.61693	2.0702	0.882019
300	0	28401.7	9377.05	0		0.126904	0.579952	0.0126286	0.00732401	0.0091988	0.736453	0.664101	1.47895	1.1564
301	0	28411.7	9377.05	0		0.19244	0.574448	0.0125701	0.00722088	0.00754734	0.884961	0.636544	1.98436	1.28788
302	0	28421.7	9377.05	0		0.0266722	0.446711	0.0257617	0.0115081	0.0117611	0.905067	0.522026	2.16758	1.05671
303	0	28431.7	9377.05	0		0.0573132	0.328907	0.0618437	0.0203408	0.0262187	0.717604	0.68297	1.93139	1.2462
304	0	28441.7	9377.05	0		0.0728004	0.277694	0.109931	0.0305272	0.0263243	1.07265	0.663653	2.15166	1.18917
305	0	28451.7	9377.05	0		0.0623998	0.308972	0.0735173	0.0227148	0.029195	0.71966	0.636365	2.35869	1.33429
306	0	28461.7	9377.05	0		0.231136	0.485274	0.0212069	0.0102912	0.0115677	0.822894	0.564679	1.88347	1.03038
307	0	28471.7	9377.05	0		0.121863	0.636279	0.118838	0.0756138	0.0079045	0.890468	0.617658	1.82663	0.990874
308	0	28481.7	9377.05	0		0.190225	0.675755	0.00995957	0.00673023	0.00683327	0.911021	0.596207	1.82218	0.628165
309	0	28491.7	9377.05	0		0.146584	0.653303	0.012033	0.00786118	0.00714197	1.01812	0.649526	1.94592	0.810702
310	0	28501.7	9377.05	0		0.183717	0.685099	0.0126131	0.00864121	0.0070422	1.13499	0.729101	1.81725	1.29987
311	0	28511.7	9377.05	0		0.230833	0.599848	0.0118428	0.00710386	0.00711477	0.923552	0.631072	1.78346	1.11961
312	0	28521.7	9377.05	0		0.163416	0.683111	0.00963895	0.00658447	0.0072621	0.838661	0.708019	1.52178	0.719117
313	0	28531.7	9377.05	0		0.147596	0.580132	0.0096604	0.0056043	0.00697154	0.743568	0.523463	1.96484	1.42448
314	0	28541.7	9377.05	0		0.200714	0.471872	0.0125394	0.00591699	0.00645006	0.848524	0.593461	2.13918	0.986832
315	0	28551.7	9377.05	0		0.171523	0.600025	0.00920432	0.00552282	0.00704849	0.724757	0.603378	1.56117	1.21207
316	0	28561.7	9377.05	0		0.187846	0.671225	0.0797078	0.0535018	0.00602953	0.844484	0.738142	2.16355	1.11517
317	0	28571.7	9377.05	0		0.144198	0.77746	0.00751489	0.00584253	0.0060987	0.886117	0.719644	2.09305	1.05755
318	0	28581.7	9377.05	0		0.0171223	0.808235	0.0180556	0.0145931	0.0133958	1.00764	0.44585	1.93096	1.55557
319	0	28591.7	9377.05	0		0.0252708	0.34587	0.0329995	0.0114135	0.0111251	0.948947	0.650396	1.81802	0.997786
320	0	28601.7	9377.05	0		0.0374734	0.298233	0.0623231	0.0185868	0.0196237	0.876094	0.561939	1.96509	1.16296
321	0	28611.7	9377.05	0		0.0399285	0.319099	0.0513241	0.0163775	0.0162153	0.934219	0.543645	2.20747	1.25932
322	0	28621.7	9377.05	0		0.0326004	0.36981	0.0479956	0.0177493	0.0150637	1.08987	0.516116	2.37433	1.27136
323	0	28631.7	9377.05	0		0.0317706	0.286399	0.0476215	0.0136388	0.0100413	1.25636	0.585991	1.98888	1.15907
324	0	28641.7	9377.05	0		0.0399292	0.217574	0.0488827	0.0106356	0.00911547	1.07922	0.538508	2.77625	1.26632
325	0	28651.7	9377.05	0		0.330069	0.399966	0.0350443	0.0140165	0.0143049	0.906323	0.561148	2.39063	1.16804
326	0	28661.7	9377.05	0		0.028413	0.511021	0.0392132	0.0200388	0.0207432	0.893557	0.562037	2.58613	1.0787
327	0	28671.7	9377.05	0		0.0308954	0.316281	0.0452192	0.014302	0.016527	0.800439	0.597087	2.53096	0.987939
328	0	28681.7	9377.05	0		0.0356645	0.874851	0.0201625	0.0176392	0.0153531	1.0627	0.617762	1.8536	1.01527
329	0	28691.7	9377.05	0		0.0294801	0.370297	0.034984	0.0129545	0.0107241	1.11735	0.43319	3.17559	1.2369
330	0	28701.7	9377.05	0		0.0260839	0.477264	0.0289783	0.0138303	0.0176519	0.724714	0.523351	2.33006	1.13831
331	0	28711.7	9377.05	0		0.0318454	0.440294	0.0335201	0.0147587	0.0154486	0.883666	0.516203	2.98492	1.09125
332	0	28721.7	9377.05	0		0.0286139	0.439019	0.0254747	0.0111839	0.0103952	0.995152	0.64164	2.51342	1.14563
333	0	28731.7	9377.05	0		0.0426056	0.356952	0.0531413	0.0189689	0.0205535	0.85366	0.691846	2.30308	0.925028
334	0	28741.7	9377.05	0		0.0247473	0.331016	0.0356223	0.0117915	0.0101541	1.07413	0.673014	2.11645	1.02767
335	0	28751.7	9377.05	0		0.00824492	0.472138	0.0111628	0.00527038	0.0047662	1.02281	0.781086	1.77146	0.999817
336	0	28761.7	9377.05	0		0.0108331	0.527421	0.0118382	0.00624372	0.00604596	0.955224	0.529411	1.81267	1.00061
337	0	28771.7	9377.05	0		0.138749	0.648805	0.0111548	0.00723731	0.00649618	1.0305	0.671606	2.15857	1.03485
338	0	28781.7	9377.05	0		0.178144	0.771226	0.00850182	0.00655682	0.0067071	0.904246	0.601928	2.0644	1.41472
339	0	28791.7	9377.05	0		0.251902	0.639283	0.0153428	0.00980838	0.00954466	0.950527	0.682462	1.87308	0.92928
340	0	28801.7	9377.05	0		0.0786755	0.342438	0.0625132	0.0214069	0.0544263	0.363808	0.957137	1.78602	1.11636
341	0	28811.7	9377.05	0		0.0273857	0.541289	0.0218566	0.0118307	0.0105501	1.03724	0.806608	1.74536	1.20612
342	0	28821.7	9377.05	0		0.0115254	0.686538	0.0107804	0.00740119	0.00784996	0.872091	0.684057	2.24776	1.10398
343	0	28831.7	9377.05	0		0.0190155	0.48719	0.0219496	0.0106936	0.0129571	0.763391	0.919128	1.85325	0.793936
344	0	28841.7	9377.05	0		0.0310186	0.447531	0.0280285	0.0125436	0.0121339	0.956203	0.892058	1.91912	1.10181
345	0	28851.7	9377.05	0		0.0131908	0.648215	0.228165	0.1479	0.0102074	0.797732	0.952725	1.97836	0.719544
346	0	28861.7	9377.05	0		0.150132	0.71576	0.133133	0.0952911	0.00925163	0.776422	0.880401	1.92019	0.60234
347	0	28871.7	9377.05	0		0.0193215	0.458922	0.0199024	0.00913362	0.0132118	0.639453	1.12491	1.67267	0.972021
348	0	28881.7	9377.05	0		0.271261	0.383019	0.0225656	0.00864303	0.0131349	0.608648	1.12902	1.60771	0.980203
349	0	28891.7	9377.05	0		0.228017	0.57767	0.0178703	0.0103231	0.0121155	0.788129	1.00897	1.8545	0.581748
350	0	28901.7	9377.05	0		0.168506	0.928973	0.00774536	0.00719523	0.00799396	0.83255	1.06717	1.72761	0.788913
351	0	28911.7	9377.05	0		0.178558	0.63055	0.0134319	0.00846949	0.00824537	0.950112	0.704798	2.71841	0.609354
352	0	28921.7	9377.05	0		0.152426	0.558251	0.119143	0.0665114	0.00921419	0.659499	1.0605	2.37966	0.632072
353	0	28931.7	9377.05	0		0.108421	0.599788	0.132175	0.0792771	0.0092585	0.738543	1.25342	1.65862	0.549976
354	0	28941.7	9377.05	0		0.145314	0.849149	0.145055	0.123173	0.00892916	0.849006	1.46937	1.36655	0.930091
355	0	28951.7	9377.05	0		0.0142052	0.986543	0.0132235	0.0130456	0.0112181	1.07565	0.942056	1.73404	0.0568828
356	0	28961.7	9377.05	0		0.14138	1.14504	0.143758	0.164609	0.00832537	1.02669	0.995877	2.36812	0.0706081
357	0	28971.7	9377.05	0		0.0142886	0.705211	0.182753	0.128879	0.0108439	0.798661	0.887798	1.90623	0.721304
358	0	28981.7	9377.05	0		0.0320945	0.432367	0.028724	0.0124193	0.0181484	0.632975	1.07728	2.47338	0.785207
359	0	28991.7	9377.05	0		0.199228	0.480555	0.0143176	0.0068804	0.00825221	0.771208	0.966487	2.27938	0.827329
360	0	29001.7	9377.05	0		0.0268572	0.413635	0.0320051	0.0132384	0.0195828	0.6253	1.11374	2.17129	0.845898
361	0	29011.7	9377.05	0		0.0312825	0.338595	0.032491	0.0110013	0.0188438	0.540012	1.44792	1.52152	0.721472
362	0	29021.7	9377.05	0		0.180736	0.577748	0.00896093	0.00517716	0.0086628	0.552791	0.93359	2.35447	0.689873
363	0	29031.7	9377.05	0		0.142409	0.702974	0.110634	0.0777727	0.00775195	0.698499	1.04529	2.02734	0.861579
364	0	29041.7	9377.05	0		0.159596	0.760548	0.00624288	0.00474801	0.00640853	0.6853	0.696029	3.31832	0.678055
365	0	29051.7	9377.05	0		0.23871	0.666185	0.0075717	0.00504416	0.00699552	0.666954	0.923974	2.2361	0.845261
366	0	29061.7	9377.05	0		0.113351	0.897307	0.00677391	0.00607828	0.00807267	0.696452	0.744539	1.60347	0.118551
367	0	29071.7	9377.05	0		0.166282	0.899097	0.00662374	0.00595538	0.00997125	0.552443	0.772761	2.16359	0.624039
368	0	29081.7	9377.05	0		0.143412	0.772927	0.00849505	0.00656605	0.0119896	0.506554	0.972188	2.57957	0.750615
369	0	28171.7	9367.05	0		0.585471	0.0667124	0.718835	0.0479552	0.373367	0.118803	1.19997	2.30259	0.970048
370	0	28181.7	9367.05	0		0.190096	1.04577	0.0911876	0.095361	0.00807261	0.828928	0.806654	2.25303	1.10807
371	0	28191.7	9367.05	0		0.173577	0.840944	0.0954451	0.080264	0.00710418	0.817683	0.836024	1.89409	0.99454
372	0	28201.7	9367.05	0		0.183313	1.02966	0.0895519	0.0922078	0.00513493	1.09422	0.835446	2.15111	0.920188
373	0	28211.7	9367.05	0		0.179097	1.34009	0.185788	0.248972	0.00615907	1.20241	0.863294	1.74081	0.846417
374	0	28221.7	9367.05	0		0.113295	1.0142	0.150144	0.152276	0.00640103	0.967193	0.810598	1.97348	0.957835
375	0	28231.7	9367.05	0		0.188333	0.675756	0.174536	0.117943	0.0121915	0.884906	0.927952	1.54195	0.909515
376	0	28241.7	9367.05	0		0.267021	0.595157	0.189737	0.112923	0.0150022	0.779005	0.992447	1.5395	0.816775
377	0	28251.7	9367.05	0		0.202719	0.761734	0.0131164	0.00999121	0.00870474	1.06167	0.749596	2.44575	1.15595
378	0	28261.7	9367.05	0		0.0387395	0.583271	0.0337655	0.0196944	0.0221505	0.82241	0.747399	2.06175	1.42541
379	0	28271.7	9367.05	0		0.0363875	0.420132	0.0396198	0.0166456	0.0175002	0.8798	0.682742	2.10067	1.15853
380	0	28281.7	9367.05	0		0.0429258	0.364823	0.0601046	0.0219275	0.022539	0.899875	0.683511	1.92764	1.20439
381	0	28291.7	9367.05	0		0.029972	0.212943	0.0539645	0.0114914	0.00931345	1.14127	0.695714	1.92057	1.41049
382	0	28301.7	9367.05	0		0.0204698	0.383529	0.0232465	0.00891569	0.0912535	1.1258	0.644171	1.97134	1.12855
383	0	28311.7	9367.05	0		0.247063	0.364828	0.0236768	0.00863794	0.00739241	1.08082	0.765739	1.68633	1.09601
384	0	28321.7	9367.05	0		0.20083	0.548108	0.0136203	0.0074654	0.0065657	1.05172	0.639538	1.45312	1.16465
385	0	28331.7	9367.05	0		0.151433	0.537059	0.0130004	0.00698197	0.00740122	0.872574	0.732977	1.79205	1.21871
386	0	28341.7	9367.05	0		0.126474	0.614574	0.114982	0.0706646	0.00844754	0.802355	0.812877	1.70329	1.03011
387	0	28351.7	9367.05	0		0.232167	0.456209	0.0167064	0.0076216	0.0102895	0.68514	0.537837	2.13229	1.31946
388	0	28361.7	9367.05	0		0.0262587	0.30401	0.0449113	0.0136535	0.0171719	0.735449	0.650293	1.59618	1.11647
389	0	28371.7	9367.05	0		0.0328169	0.193671	0.0608687	0.0117885	0.0163888	0.665332	0.583228	1.31437	1.22392
390	0	28381.7	9367.05	0		0.177532	0.487508	0.0188211	0.00917543	0.013943	0.608694	0.664725	1.67844	1.17739
391	0	28391.7	9367.05	0		0.169733	0.69336	0.0105836	0.00733821	0.0107689	0.630301	0.552103	2.10403	0.998277
392	0	28401.7	9367.05	0		0.152298	0.642928	0.0136869	0.00879967	0.0115656	0.70376	0.493862	2.4983	1.0805
393	0	28411.7	9367.05	0		0.243113	0.53499	0.0139304	0.00745264	0.00941006	0.732564	0.634899	1.52646	1.04997
394	0	28421.7	9367.05	0		0.0182199	0.372502	0.0252626	0.00941039	0.00946535	0.919599	0.480577	1.96032	1.07294
395	0	28431.7	9367.05	0		0.0534902	0.25115	0.0643209	0.0161542	0.0150212	0.994734	0.500847	2.36897	1.22828
396	0	28441.7	9367.05	0		0.0377282	0.26125	0.0480869	0.0125627	0.148856	0.946848	0.557401	2.1806	1.35818
397	0	28451.7	9367.05	0		0.0345373	0.295721	0.0464939	0.0137492	0.0146093	0.870514	0.498339	2.14389	1.2954
398	0	28461.7	9367.05	0		0.0141864	0.440693	0.0188567	0.00831	0.00669005	1.14894	0.527373	2.0405	1.19732
399	0	28471.7	9367.05	0		0.131339	0.560382	0.0108596	0.00608552	0.00640056	0.879441	0.467757	1.8857	1.54735
400	0	28481.7	9367.05	0		0.137472	0.537271	0.0101134	0.00543363	0.00648812	0.774637	0.531998	1.61381	1.0752
401	0	28491.7	9367.05	0		0.16225	0.565463	0.010332	0.00584235	0.00598514	0.902902	0.546509	2.34017	0.842319
402	0	28501.7	9367.05	0		0.0151472	0.482648	0.0221998	0.0107147	0.00930587	1.065	0.486417	2.06324	1.25621
403	0	28511.7	9367.05	0		0.0370301	0.249059	0.0609376	0.0151771	0.0136454	1.02879	0.474721	2.14533	1.32958
404	0	28521.7	9367.05	0		0.158108	0.599066	0.139017	0.0832805	0.00554713	0.994102	0.420812	2.10365	1.17487
405	0	28531.7	9367.05	0		0.20869	0.57269	0.0133821	0.00766381	0.00803098	0.882681	0.337569	3.27571	1.26763
406	0	28541.7	9367.05	0		0.195831	0.565989	0.0102471	0.00579974	0.00786889	0.681745	0.561187	1.93983	1.26477
407	0	28551.7	9367.05	0		0.220554	0.621068	0.00886476	0.00550562	0.00830239	0.613381	0.556554	2.17367	1.03423
408	0	28561.7	9367.05	0		0.225749	0.555839	0.120464	0.0669587	0.00516975	0.934827	0.528535	1.71317	1.0332
409	0	28571.7	9367.05	0		0.141282	0.70223	0.0090196	0.00633384	0.0811977	1.02045	0.718014	1.81854	0.981067
410	0	28581.7	9367.05	0		0.158828	0.633669	0.0951153	0.0602716	0.0671421	0.940345	0.649679	1.97957	1.16955
411	0	28591.7	9367.05	0		0.13842	0.456913	0.165376	0.0755625	0.00438869	1.08792	0.50363	2.15194	1.12784
412	0	28601.7	9367.05	0		0.317593	0.347903	0.0385502	0.0134117	0.0113786	1.09024	0.525547	2.27211	1.20455
413	0	28611.7	9367.05	0		0.21756	0.423869	0.0416438	0.0176515	0.0167319	0.975806	0.446638	2.61944	1.22303
414	0	28621.7	9367.05	0		0.0401163	0.427091	0.0344164	0.0146989	0.00991415	1.37138	0.44965	2.72223	1.17411
415	0	28631.7	9367.05	0		0.047361	0.328944	0.0621777	0.020453	0.0148267	1.27597	0.450111	2.61852	1.16986
416	0	28641.7	9367.05	0		0.0292686	0.487062	0.0383398	0.0186739	0.100772	1.18914	0.472483	2.41719	1.20021
417	0	28651.7	9367.05	0		0.0329948	0.596979	0.0377311	0.0225247	0.0258	0.807546	0.463162	2.42516	1.35647
418	0	28661.7	9367.05	0		0.0240892	0.499211	0.0252815	0.0126208	0.0117026	0.997549	0.58358	2.45855	1.31367
419	0	28671.7	9367.05	0		0.0210971	0.271927	0.0329153	0.00895056	0.00861317	0.961202	0.59176	2.35102	1.10886
420	0	28681.7	9367.05	0		0.0272777	0.321577	0.0371071	0.0119328	0.0119259	0.925506	0.400512	2.22334	1.13934
421	0	28691.7	9367.05	0		0.511002	0.406466	0.041113	0.016711	0.0175108	0.882721	0.548004	2.37682	1.23424
422	0	28701.7	9367.05	0		0.0292808	0.328308	0.0549197	0.0180306	0.0170441	0.978507	0.483287	2.58298	1.21486
423	0	28711.7	9367.05	0		0.0290317	0.349753	0.0318677	0.0111458	0.0093518	1.10242	0.529266	2.63025	1.16164
424	0	28721.7	9367.05	0		0.0323295	0.448153	0.0368393	0.0165096	0.0162994	0.936899	0.477614	2.9175	1.18519
425	0	28731.7	9367.05	0		0.0450708	0.383975	0.0520949	0.0200031	0.0213986	0.86465	0.538972	2.53227	1.06313
426	0	28741.7	9367.05	0		0.0224517	0.278366	0.0375351	0.0104485	0.00922185	1.048	0.514909	2.75138	1.19465
427	0	28751.7	9367.05	0		0.0235368	0.381983	0.0265653	0.0101475	0.00884249	1.06148	0.545664	2.45801	1.16335
428	0	28761.7	9367.05	0		0.055747	0.539425	0.0329991	0.0178005	0.0152539	1.07939	0.550265	2.11327	1.25391
429	0	28771.7	9367.05	0		0.019643	0.548273	0.0222988	0.0122258	0.009956	1.13585	0.660677	2.15793	1.13569
430	0	28781.7	9367.05	0		0.16893	0.731054	0.00976853	0.00714132	0.00634696	1.04073	0.664718	1.93689	0.860103
431	0	28791.7	9367.05	0		0.130226	0.639928	0.0131645	0.00842433	0.00751739	1.03656	0.620671	1.92214	1.0366
432	0	28801.7	9367.05	0		0.197287	0.727212	0.0160362	0.0116617	0.00980795	1.0998	0.601156	2.20335	1.01596
433	0	28811.7	9367.05	0		0.0230473	0.447453	0.0239851	0.0107322	0.0152008	0.653056	0.785694	1.84556	1.00756
434	0	28821.7	9367.05	0		0.169062	0.819893	0.00966472	0.00792403	0.100595	0.852318	0.58706	2.5091	0.889094
435	0	28831.7	9367.05	0		0.178836	0.974839	0.0848458	0.0827109	0.00776782	0.91891	0.812695	1.92356	1.47381
436	0	28841.7	9367.05	0		0.175337	0.72127	0.0104343	0.00752591	0.00718659	0.968642	0.658506	2.03761	0.951735
437	0	28851.7	9367.05	0		0.144018	0.657146	0.0111114	0.0073018	0.00562407	1.2009	0.551605	2.62917	1.03752
438	0	28861.7	9367.05	0		0.218046	0.566941	0.142207	0.0806231	0.0141773	0.573383	0.913105	1.87129	1.00353
439	0	28871.7	9367.05	0		0.183228	0.488026	0.0145401	0.00709596	0.00980245	0.669583	0.838747	2.1585	0.973272
440	0	28881.7	9367.05	0		0.141252	0.594956	0.0860688	0.0512072	0.00861961	0.644576	0.708908	1.6665	0.976108
441	0	28891.7	9367.05	0		0.158974	0.810887	0.00798401	0.00647412	0.00654833	0.914488	0.779355	2.30399	0.937499
442	0	28901.7	9367.05	0		0.199879	0.911917	0.130891	0.119362	0.00617817	1.08245	1.12711	1.82651	0.663776
443	0	28911.7	9367.05	0		0.177701	0.951669	0.00732065	0.00696684	0.00697624	0.923722	0.841477	2.93242	0.86772
444	0	28921.7	9367.05	0		0.169798	0.882545	0.0110326	0.00973679	0.010047	0.896413	0.872268	2.07632	0.714986
445	0	28931.7	9367.05	0		0.154695	0.882377	0.0105757	0.00933178	0.00982866	0.878209	1.36576	1.34838	1.12867
446	0	28941.7	9367.05	0		0.150683	1.06973	0.10452	0.111808	0.00779932	0.975005	0.804991	2.32132	0.77702
447	0	28951.7	9367.05	0		0.16035	1.0924	0.00816301	0.00891728	0.00861968	0.956906	0.9858	2.52069	0.997223
448	0	28961.7	9367.05	0		0.0218616	0.655795	0.018084	0.0118594	0.00989423	1.10868	1.11444	2.13328	0.821442
449	0	28971.7	9367.05	0		0.0168728	0.481171	0.0163002	0.00784318	0.00988969	0.733563	0.811295	2.04933	0.725842
450	0	28981.7	9367.05	0		0.0225567	0.326014	0.0312505	0.0101881	0.0140977	0.668456	0.894034	2.05445	0.890513
451	0	28991.7	9367.05	0		0.247897	0.419918	0.0199447	0.00837515	0.0114431	0.67698	1.32389	2.0623	0.74802
452	0	29001.7	9367.05	0		0.189303	0.547856	0.0121217	0.00664095	0.00844283	0.727561	1.10633	2.68546	0.807176
453	0	29011.7	9367.05	0		0.0122322	0.495108	0.0164886	0.00816365	0.0153397	0.49226	1.38737	1.87749	0.832861
454	0	29021.7	9367.05	0		0.0113579	0.572822	0.0131928	0.0075571	0.0105166	0.664673	1.09365	2.37331	0.521747
455	0	29031.7	9367.05	0		0.141393	0.425121	0.0104992	0.00446342	0.00691395	0.59713	1.00415	3.02872	0.557382
456	0	29041.7	9367.05	0		0.190363	0.397576	0.0182699	0.00726367	0.00987592	0.680309	1.25502	2.07966	0.605475
457	0	29051.7	9367.05	0		0.0340958	0.323515	0.03153	0.0102004	0.0136193	0.692776	1.26654	2.03451	0.690439
458	0	29061.7	9367.05	0		0.0170755	0.494898	0.016868	0.00834793	0.0123686	0.624288	0.980131	2.20937	0.935932
459	0	29071.7	9367.05	0		0.00908207	0.634149	0.0112837	0.00715557	0.010575	0.625882	1.13245	15.7746	0.102709
460	0	29081.7	9367.05	0		0.00999631	0.443814	0.0163224	0.00724411	0.0138312	0.484455	1.20951	2.08073	0.640475
461	0	29091.7	9367.05	0		0.223357	0.486058	0.0203449	0.00988879	0.0209137	0.437361	1.24492	18.2438	0.742045
462	0	29101.7	9367.05	0		0.203891	0.687872	0.00953961	0.00656203	0.00967813	0.627154	1.20061	1.35783	0.766232
463	0	29111.7	9367.05	0		0.0184345	0.410883	0.0174592	0.00717368	0.0101279	0.655165	0.827823	3.02035	0.963155
464	0	29121.7	9367.05	0		0.0268638	0.256264	0.043879	0.0112446	0.0142252	0.73116	1.11935	2.51194	0.776164
465	0	28091.7	9357.05	0		0.216492	0.946247	0.147217	0.139303	0.00672301	0.6951	1.05382	2.77774	0.703886
466	0	28101.7	9357.05	0		0.192391	1.21299	0.171435	0.207949	0.0076083	1.00449	1.04965	1.61463	0.694545
467	0	28111.7	9357.05	0		0.0121075	1.14377	0.162738	0.186134	0.00611564	1.03327	0.819587	1.9954	0.670548
468	0	28121.7	9357.05	0		0.0614403	0.439498	0.304352	0.133762	0.0310334	0.545587	1.16115	2.02069	0.740559
469	0	28131.7	9357.05	0		0.0628896	0.425059	0.300308	0.127649	0.0276026	0.683869	1.28307	1.4948	0.916792
470	0	28141.7	9357.05	0		0.274869	0.672929	0.149206	0.100405	0.0190754	0.756946	1.18479	2.10122	0.777002
471	0	28151.7	9357.05	0		0.178674	1.21407	0.138074	0.167632	0.00636707	1.0888	0.933644	2.49527	0.587719
472	0	28161.7	9357.05	0		0.231106	0.883206	0.0110918	0.00979634	0.008369	1.08272	1.41849	1.54918	0.798945
473	0	28171.7	9357.05	0		0.17981	0.689079	0.00825449	0.005688	0.00671315	0.783719	1.01941	2.27881	0.708692
474	0	28181.7	9357.05	0		0.150026	0.748751	0.00923487	0.00691462	0.00734477	0.870798	0.801544	2.48801	0.883538
475	0	28191.7	9357.05	0		0.144046	0.586136	0.120505	0.0706322	0.101496	0.879839	0.715246	1.76375	0.726568
476	0	28201.7	9357.05	0		0.22886	0.834495	0.189038	0.157751	0.00853223	0.842902	0.666158	2.38309	0.66287
477	0	28211.7	9357.05	0		0.251792	0.894271	0.122808	0.109823	0.00736249	1.07727	0.933202	1.95354	0.661485
478	0	28221.7	9357.05	0		0.0109484	1.01443	0.12367	0.125454	0.0985163	0.9901	0.789696	2.45971	1.07286
479	0	28231.7	9357.05	0		0.15435	0.863246	0.013735	0.0118567	0.010986	0.998273	0.387948	1.82444	0.798348
480	0	28241.7	9357.05	0		0.123521	0.868706	0.0113293	0.00984186	0.00847102	1.07466	0.693806	2.01116	1.01234
481	0	28251.7	9357.05	0		0.133611	0.814017	0.142541	0.116031	0.00720882	1.13802	0.39698	2.1692	1.31662
482	0	28261.7	9357.05	0		0.237937	0.551987	0.0188684	0.0104151	0.00891258	1.08091	0.690553	1.89623	0.88622
483	0	28271.7	9357.05	0		0.052075	0.264588	0.0613936	0.016244	0.0187253	0.802403	0.726878	1.67894	1.12549
484	0	28281.7	9357.05	0		0.0597846	0.199309	0.0985511	0.0196421	0.0216022	0.841041	0.622504	1.86277	1.38129
485	0	28291.7	9357.05	0		0.0729277	0.404403	0.0631309	0.0255304	0.0294398	0.802139	0.627597	1.87113	1.55148
486	0	28301.7	9357.05	0		0.20682	0.32013	0.0297471	0.00952296	0.00784953	1.12216	0.565784	2.13597	1.25237
487	0	28311.7	9357.05	0		0.163279	0.639259	0.120308	0.0769081	0.00591311	1.16321	0.505416	1.79307	0.902458
488	0	28321.7	9357.05	0		0.147159	0.713148	0.104149	0.0742739	0.00666437	0.983714	0.592359	2.28167	1.28811
489	0	28331.7	9357.05	0		0.184113	0.550824	0.0119488	0.00658172	0.00759716	0.801337	0.581996	1.62143	1.11641
490	0	28341.7	9357.05	0		0.222014	0.410546	0.0156629	0.00643034	0.00932151	0.638081	0.508799	2.81007	1.12678
491	0	28351.7	9357.05	0		0.213409	0.498101	0.135491	0.0674885	0.00945278	0.677358	0.639331	2.01802	1.10354
492	0	28361.7	9357.05	0		0.163782	0.499926	0.0141255	0.00706173	0.00727871	0.897396	0.49782	1.97943	0.919706
493	0	28371.7	9357.05	0		0.177332	0.603188	0.185736	0.112034	0.00896954	0.819338	0.476273	1.89272	1.10061
494	0	28381.7	9357.05	0		0.169136	0.586675	0.104997	0.0615989	0.00949025	0.758487	0.6479	1.98205	1.19621
495	0	28391.7	9357.05	0		0.170875	0.471452	0.0126773	0.00597673	0.00772445	0.715688	0.58583	2.12028	1.10427
496	0	28401.7	9357.05	0		0.137664	0.605056	0.0121959	0.00737919	0.00923059	0.739447	0.595897	2.45514	1.28879
497	0	28411.7	9357.05	0		0.169549	0.563872	0.0130053	0.00733335	0.00849643	0.798351	0.482928	2.2679	1.03316
498	0	28421.7	9357.05	0		0.174634	0.419851	0.0222261	0.00933165	0.0100272	0.860812	0.596879	1.95748	1.40245
499	0	28431.7	9357.05	0		0.0285135	0.202365	0.0754837	0.0152753	0.0172553	0.818832	0.503613	2.05196	1.24182
500	0	28441.7	9357.05	0		0.022895	0.320796	0.0305527	0.00980119	0.00889724	1.01895	0.475313	1.897	1.17277
501	0	28451.7	9357.05	0		0.130409	0.349933	0.0205018	0.00717426	0.00632203	1.04966	0.435028	2.04594	1.15525
502	0	28461.7	9357.05	0		0.0162859	0.375139	0.0232175	0.00870979	0.00682989	1.17956	0.430456	2.16023	1.14583
503	0	28471.7	9357.05	0		0.14894	0.460828	0.0148255	0.00683198	0.00583287	1.08341	0.480094	2.14363	0.833062
504	0	28481.7	9357.05	0		0.205643	0.445499	0.0219548	0.00978085	0.0102308	0.884287	0.418275	2.21403	1.28724
505	0	28491.7	9357.05	0		0.223848	0.413932	0.0165814	0.00686357	0.00683511	0.928822	0.511645	2.30872	1.20197
506	0	28501.7	9357.05	0		0.0287879	0.285484	0.0475874	0.0135854	0.0125598	1.00051	0.464595	2.07619	1.38243
507	0	28511.7	9357.05	0		0.112235	0.293682	0.114349	0.0335821	0.02808	1.10621	0.465316	2.35407	1.44807
508	0	28521.7	9357.05	0		0.257398	0.320766	0.0321734	0.0103201	0.0108016	0.883743	0.449237	1.9464	1.32919
509	0	28531.7	9357.05	0		0.175433	0.542352	0.0125897	0.00682802	0.00725251	0.870832	0.485271	2.47619	1.34951
510	0	28541.7	9357.05	0		0.125124	0.554826	0.0114939	0.00637711	0.00831395	0.709486	0.620592	2.64723	0.912998
511	0	28551.7	9357.05	0		0.153093	0.450461	0.142011	0.0639705	0.00750603	0.697249	0.629841	1.80307	1.11738
512	0	28561.7	9357.05	0		0.145002	0.633803	0.00959576	0.00608182	0.0586717	1.04846	0.474926	2.42629	1.13389
513	0	28571.7	9357.05	0		0.167347	0.611904	0.00998595	0.00611045	0.00669439	0.844286	0.43207	2.07004	1.83594
514	0	28581.7	9357.05	0		0.174205	0.613381	0.111234	0.0682291	0.00535973	0.926744	0.542879	2.07457	1.1705
515	0	28591.7	9357.05	0		0.166688	0.632899	0.00917932	0.00580958	0.00501633	1.07124	0.619511	2.91295	1.27925
516	0	28601.7	9357.05	0		0.0287845	0.295855	0.0416643	0.0123266	0.00808179	1.41079	0.458299	2.08427	0.989168
517	0	28611.7	9357.05	0		0.0436032	0.239977	0.0855317	0.0205256	0.0166201	1.14233	0.486613	2.26768	1.3157
518	0	28621.7	9357.05	0		0.0331199	0.435175	0.0406979	0.0177107	0.0109408	1.49732	0.440724	2.70872	1.24482
519	0	28631.7	9357.05	0		0.0373521	0.468019	0.0403274	0.018874	0.0134579	1.29723	0.404004	2.90444	1.34006
520	0	28641.7	9357.05	0		0.0421983	0.362435	0.0360969	0.0130828	0.0106393	1.13741	0.440929	3.10828	1.33294
521	0	28651.7	9357.05	0		0.0241533	0.437078	0.0237683	0.0103886	0.00904343	1.06255	0.395553	2.83393	1.18897
522	0	28661.7	9357.05	0		0.0209353	0.35456	0.0222593	0.00789228	0.00695491	1.04964	0.463896	2.35117	1.11478
523	0	28671.7	9357.05	0		0.0271162	0.336124	0.0427744	0.0143775	0.01607	0.827552	0.415083	2.53616	1.40202
524	0	28681.7	9357.05	0		0.0252617	0.249903	0.0478145	0.011949	0.0128334	0.86123	0.479886	2.54145	1.28887
525	0	28691.7	9357.05	0		0.0344618	0.303459	0.0369851	0.0112235	0.00852327	1.218	0.544849	2.11268	1.45386
526	0	28701.7	9357.05	0		0.0377529	0.328632	0.0476669	0.0156649	0.0166048	0.872611	0.500477	2.35387	1.30077
527	0	28711.7	9357.05	0		0.0233215	0.399403	0.0294372	0.0117573	0.0111611	0.974385	0.468173	2.34103	1.25521
528	0	28721.7	9357.05	0		0.0294963	0.350674	0.0335912	0.0117796	0.00870705	1.25137	0.490963	2.62325	1.22771
529	0	28731.7	9357.05	0		0.0356428	0.402176	0.0365133	0.0146848	0.0123556	1.09934	0.509335	2.25847	1.30105
530	0	28741.7	9357.05	0		0.0644062	0.281596	0.067755	0.0190795	0.0196565	0.89782	0.541177	2.28031	1.34491
531	0	28751.7	9357.05	0		0.0251758	0.296507	0.0468815	0.0139007	0.011451	1.12284	0.541832	2.42901	1.10808
532	0	28761.7	9357.05	0		0.148576	0.372791	0.0164717	0.00614049	0.00493057	1.15195	0.594526	1.59909	1.13335
533	0	28771.7	9357.05	0		0.172176	0.372138	0.0270177	0.0100543	0.012282	0.757197	0.5459	1.87616	1.20045
534	0	28781.7	9357.05	0		0.122938	0.63815	0.142935	0.0912143	0.00775044	0.934699	0.526211	2.10045	1.42529
535	0	28791.7	9357.05	0		0.188042	0.786342	0.0133485	0.0104965	0.00950585	1.02137	0.668009	1.83725	1.3744
536	0	28801.7	9357.05	0		0.0129755	0.583742	0.0149688	0.00873792	0.00933547	0.865763	0.616385	1.81699	0.924437
537	0	28811.7	9357.05	0		0.130849	0.467536	0.0153801	0.00719073	0.00981462	0.677684	0.521644	1.72627	1.21898
538	0	28821.7	9357.05	0		0.313946	0.551998	0.0187076	0.0103265	0.0124699	0.765987	0.661494	2.06701	1.35212
539	0	28831.7	9357.05	0		0.154927	0.766531	0.112295	0.0860773	0.00808554	0.888833	0.660012	2.36078	1.15153
540	0	28841.7	9357.05	0		0.165022	0.792342	0.0112392	0.00890526	0.0100802	0.817158	0.667265	2.60567	0.998237
541	0	28851.7	9357.05	0		0.178098	0.602971	0.0148134	0.00893203	0.0101856	0.811131	0.694449	2.28382	0.87982
542	0	28861.7	9357.05	0		0.168422	0.850544	0.0104445	0.00888349	0.010126	0.811475	0.744008	2.24827	0.973216
543	0	28871.7	9357.05	0		0.162821	0.683213	0.0137921	0.00942295	0.0140174	0.621794	0.83408	1.98308	0.92296
544	0	28881.7	9357.05	0		0.106915	0.678295	0.0122586	0.00831492	0.0108638	0.707955	0.660497	1.9633	0.852188
545	0	28891.7	9357.05	0		0.196828	0.834146	0.00990414	0.0082615	0.00670085	1.1404	0.80546	1.93631	1.01677
546	0	28901.7	9357.05	0		0.151683	0.911871	0.00934235	0.00851902	0.00697409	1.12987	0.824823	1.9845	1.58096
547	0	28911.7	9357.05	0		0.198709	1.20077	0.00665068	0.00798594	0.0893415	1.01626	0.803472	1.85433	0.833354
548	0	28921.7	9357.05	0		0.201692	0.799643	0.0105942	0.00847162	0.00776506	1.00913	0.724701	2.53073	0.987726
549	0	28931.7	9357.05	0		0.168775	0.774185	0.00853941	0.00661108	0.00686256	0.891073	0.94838	1.78185	0.522791
550	0	28941.7	9357.05	0		0.289838	0.298878	0.0468387	0.0139991	0.0197681	0.65503	1.26197	1.49147	0.854769
551	0	28951.7	9357.05	0		0.0307174	0.435158	0.0262476	0.0114219	0.0112465	0.939391	1.06286	1.63814	0.692555
552	0	28961.7	9357.05	0		0.0302532	0.481629	0.0336367	0.0162004	0.0163292	0.917675	1.09806	1.58079	0.982591
553	0	28971.7	9357.05	0		0.185612	0.645028	0.0138768	0.0089509	0.00868068	0.953763	0.850848	1.94297	0.940837
554	0	28981.7	9357.05	0		0.239093	0.433452	0.0208901	0.00905486	0.0117388	0.713488	1.01169	1.59317	1.1112
555	0	28991.7	9357.05	0		0.0121831	0.614957	0.0136841	0.00841517	0.0116847	0.666151	1.25035	3.78444	0.538342
556	0	29001.7	9357.05	0		0.167065	0.645239	0.0109201	0.00704609	0.00887992	0.73395	1.17796	2.4168	0.0609203
557	0	29011.7	9357.05	0		0.18566	0.604158	0.0127482	0.00770194	0.00827674	0.860733	0.842718	2.45002	0.480375
558	0	29021.7	9357.05	0		0.016284	0.46612	0.0165499	0.00771422	0.0103949	0.686434	1.14358	2.19489	0.857323
559	0	29031.7	9357.05	0		0.0448666	0.25263	0.0513832	0.012981	0.0169011	0.710429	1.37923	2.05408	0.703995
560	0	29041.7	9357.05	0		0.0658354	0.341665	0.397131	0.135686	0.0331294	0.552535	1.30071	2.53775	0.621667
561	0	29051.7	9357.05	0		0.0767927	0.343864	0.0621259	0.0213629	0.0337601	0.585306	1.39082	2.21285	0.722336
562	0	29061.7	9357.05	0		0.016534	0.375448	0.0160105	0.0060111	0.0101264	0.549067	1.26276	2.17031	0.87325
563	0	29071.7	9357.05	0		0.020461	0.458519	0.0243251	0.0111535	0.0187324	0.550738	1.68058	2.37131	0.59402
564	0	29081.7	9357.05	0		0.0359247	0.2944	0.0387013	0.0113937	0.0215964	0.487988	1.23601	2.17579	0.692611
565	0	29091.7	9357.05	0		0.138813	0.458221	0.0156988	0.00719351	0.0112232	0.592859	1.08891	1.46656	1.22726
566	0	29101.7	9357.05	0		0.1582	0.52467	0.0123502	0.0064798	0.010891	0.550328	0.888442	3.20181	0.526446
567	0	29111.7	9357.05	0		0.0196823	0.309159	0.0268835	0.00831128	0.0144678	0.531363	1.10056	3.29027	0.623231
568	0	29121.7	9357.05	0		0.033163	0.46727	0.0308078	0.0143956	0.0371937	0.358003	1.47945	1.96501	0.916532
569	0	29131.7	9357.05	0		0.0307945	0.862375	0.0140038	0.0120766	0.0207208	0.539093	0.842233	2.45639	0.0916227
570	0	29141.7	9357.05	0		0.0123055	0.720442	0.0111973	0.00806702	0.0129875	0.574533	0.754525	1.456	0.776995
571	0	29151.7	9357.05	0		0.224412	0.588797	0.00786495	0.00463086	0.00811463	0.527862	0.701447	2.16535	1.05762
572	0	28051.7	9347.05	0		0.224862	1.24321	0.0941122	0.117001	0.00754363	0.887735	0.857912	2.12159	0.82292
573	0	28061.7	9347.05	0		0.198572	1.25698	0.0705823	0.0887203	0.00531932	0.873964	0.857878	2.00721	1.41961
574	0	28071.7	9347.05	0		0.208148	1.10016	0.0884994	0.0973636	0.00687656	0.877707	0.868016	2.49335	0.0919987
575	0	28081.7	9347.05	0		0.207933	1.24011	0.118388	0.146815	0.00674509	0.970774	0.907629	1.61147	0.594259
576	0	28091.7	9347.05	0		0.153556	0.891283	0.0839976	0.0748656	0.0046346	0.887592	0.947721	2.95196	0.592497
577	0	28101.7	9347.05	0		0.0165808	0.887269	0.134679	0.119496	0.0892131	1.15664	1.0838	2.08175	0.828767
578	0	28111.7	9347.05	0		0.0204237	1.18241	0.00990796	0.0117153	0.00853413	1.26976	1.37371	1.42532	0.555026
579	0	28121.7	9347.05	0		0.0103525	1.26297	0.12105	0.152883	0.00938499	0.907298	0.940118	2.43747	0.768866
580	0	28131.7	9347.05	0		0.0110885	1.06407	0.00817339	0.00869709	0.00888464	0.905445	1.28662	1.71377	4.85964
581	0	28141.7	9347.05	0		0.144123	0.81858	0.133148	0.108992	0.00656413	0.906565	1.00335	1.71218	1.33672
582	0	28151.7	9347.05	0		0.160562	0.928061	0.0074486	0.00691276	0.00630125	1.01473	0.646244	3.10062	0.961139
583	0	28161.7	9347.05	0		0.146504	0.934112	0.134739	0.125861	0.00642432	1.19112	0.632336	1.86168	0.981034
584	0	28171.7	9347.05	0		0.196486	0.850119	0.124722	0.106028	0.00640175	0.887184	0.882721	2.60706	1.48007
585	0	28181.7	9347.05	0		0.173483	0.673514	0.0138491	0.00932758	0.0971639	1.03879	0.719679	1.5483	1.09244
586	0	28191.7	9347.05	0		0.153698	0.518401	0.0184813	0.00958071	0.00812459	1.09075	0.797688	1.69385	1.08913
587	0	28201.7	9347.05	0		0.187605	0.692813	0.145133	0.10055	0.00658026	1.02263	0.800848	1.69487	0.983065
588	0	28211.7	9347.05	0		0.233128	0.720171	0.10892	0.0784409	0.00684292	0.980948	0.732873	1.94145	1.14485
589	0	28221.7	9347.05	0		0.221265	0.708742	0.0133883	0.00948887	0.0100414	0.874077	0.984942	1.85623	1.05136
590	0	28231.7	9347.05	0		0.156626	0.504673	0.229225	0.115684	0.0120143	0.849935	0.500392	1.82542	1.45043
591	0	28241.7	9347.05	0		0.0386554	0.115081	0.133811	0.0153991	0.0176894	0.805212	0.563023	1.72961	1.35502
592	0	28251.7	9347.05	0		0.222663	0.508398	0.019623	0.00997629	0.0137641	0.670425	0.725054	1.3134	1.1063
593	0	28261.7	9347.05	0		0.224657	0.595621	0.0133976	0.00797987	0.00805185	0.916701	0.568746	2.32534	0.97891
594	0	28271.7	9347.05	0		0.0256085	0.29759	0.0375565	0.0111764	0.0130325	0.793235	0.608848	1.57605	1.351
595	0	28281.7	9347.05	0		0.196804	0.411088	0.0193322	0.00794726	0.00723009	1.01672	0.540276	2.14396	1.19517
596	0	28291.7	9347.05	0		0.0309891	0.321667	0.0547065	0.0175973	0.0158937	1.02411	0.538401	2.36184	1.37356
597	0	28301.7	9347.05	0		0.368254	0.184485	0.525915	0.0970232	0.0235905	0.760844	0.560526	1.98005	1.30349
598	0	28311.7	9347.05	0		0.189762	0.315561	0.0320715	0.0101205	0.00976377	0.958768	0.469699	2.18276	1.38079
599	0	28321.7	9347.05	0		0.166802	0.512513	0.0122672	0.00628708	0.0725323	0.937621	0.502756	2.73915	1.20619
600	0	28331.7	9347.05	0		0.213468	0.510409	0.0148631	0.00758626	0.00836232	0.839128	0.538847	2.34634	1.18697
601	0	28341.7	9347.05	0		0.238689	0.541272	0.013328	0.0072141	0.00943855	0.706975	0.491483	2.06462	1.13334
602	0	28351.7	9347.05	0		0.210786	0.512061	0.0177635	0.00909599	0.00944411	0.890874	0.647405	2.14079	1.35509
603	0	28361.7	9347.05	0		0.207632	0.464177	0.0180347	0.00837129	0.00817046	0.947705	0.325558	2.16547	1.11307
604	0	28371.7	9347.05	0		0.232729	0.512658	0.0156345	0.00801514	0.00731052	1.01412	0.568834	1.78054	1.35872
605	0	28381.7	9347.05	0		0.223825	0.380912	0.0182961	0.00696921	0.00879315	0.733106	0.536895	2.64156	1.33567
606	0	28391.7	9347.05	0		0.00991205	0.484045	0.0158817	0.00768745	0.0108586	0.654842	0.467261	2.74694	1.19919
607	0	28401.7	9347.05	0		0.171525	0.46039	0.0143075	0.00658705	0.0089354	0.681875	0.483383	2.40503	1.0683
608	0	28411.7	9347.05	0		0.13804	0.512048	0.013333	0.00682715	0.00845979	0.746462	0.425724	2.35048	1.25728
609	0	28421.7	9347.05	0		0.0134939	0.31434	0.0265916	0.0083588	0.0099602	0.776253	0.453609	2.50414	1.0877
610	0	28431.7	9347.05	0		0.170446	0.455021	0.015245	0.00693681	0.00847744	0.756872	0.548624	1.59837	1.16304
611	0	28441.7	9347.05	0		0.157916	0.357859	0.0228607	0.0081809	0.00949849	0.796662	0.570008	2.29099	1.50416
612	0	28451.7	9347.05	0		0.120579	0.37769	0.0187377	0.00707703	0.00660223	0.991489	0.416025	2.36499	1.37509
613	0	28461.7	9347.05	0		0.0352323	0.291044	0.0465216	0.0135399	0.0129823	0.964696	0.481075	2.0482	1.01879
614	0	28471.7	9347.05	0		0.029587	0.343546	0.0428296	0.014714	0.012387	1.09873	0.458048	2.40442	1.23072
615	0	28481.7	9347.05	0		0.0514426	0.30048	0.0629443	0.0189135	0.0174648	1.0017	0.499474	2.08146	1.28039
616	0	28491.7	9347.05	0		0.323191	0.195941	0.0541449	0.0106092	0.0136271	0.720124	0.425798	2.34791	1.35683
617	0	28501.7	9347.05	0		0.0387859	0.240574	0.0597386	0.0143716	0.0189615	0.701068	0.408284	2.26788	1.4411
618	0	28511.7	9347.05	0		0.154528	0.243154	0.0294048	0.0071499	0.0516614	1.06726	0.495788	2.26293	1.39197
619	0	28521.7	9347.05	0		0.126568	0.409084	0.0165917	0.00678742	0.00660555	0.950436	0.458425	2.09138	1.19177
620	0	28531.7	9347.05	0		0.183207	0.276711	0.0222462	0.00615579	0.0066899	0.851122	0.464587	2.18624	1.16782
621	0	28541.7	9347.05	0		0.191859	0.415416	0.0116056	0.00482117	0.0054175	0.823153	0.433188	2.01235	1.19859
622	0	28551.7	9347.05	0		0.213403	0.561309	0.0953296	0.0535094	0.00604016	0.830321	0.573531	2.08226	1.14794
623	0	28561.7	9347.05	0		0.162315	0.578221	0.0119837	0.00692925	0.00692989	0.924884	0.454829	2.32668	1.07146
624	0	28571.7	9347.05	0		0.186617	0.466301	0.0126724	0.00590916	0.00680696	0.802971	0.429149	2.31432	1.17053
625	0	28581.7	9347.05	0		0.138595	0.628048	0.0103673	0.00651116	0.00720372	0.836044	0.448059	1.81901	1.42347
626	0	28591.7	9347.05	0		0.124243	0.612184	0.123053	0.0753313	0.00508803	0.939192	0.422846	2.74983	1.10205
627	0	28601.7	9347.05	0		0.0151224	0.47028	0.0144489	0.00679505	0.00609977	1.0304	0.454753	2.1358	1.17839
628	0	28611.7	9347.05	0		0.0272508	0.375586	0.044082	0.0165566	0.0103633	1.47774	0.482451	2.07531	1.23258
629	0	28621.7	9347.05	0		0.0404007	0.286167	0.0459803	0.013158	0.0105416	1.15455	0.375519	2.50583	1.38954
630	0	28631.7	9347.05	0		0.0305532	0.423726	0.0336736	0.0142684	0.0129121	1.02213	0.391586	2.93346	1.38036
631	0	28641.7	9347.05	0		0.0356221	0.43261	0.0467449	0.0202223	0.0171192	1.09263	0.424524	2.76544	1.32739
632	0	28651.7	9347.05	0		0.0329343	0.359178	0.0348114	0.0125035	0.00906571	1.27573	0.42384	2.60468	1.32864
633	0	28661.7	9347.05	0		0.0465737	0.455417	0.0315359	0.014362	0.0115237	1.15279	0.434192	2.79657	1.13464
634	0	28671.7	9347.05	0		0.0365489	0.398714	0.0411016	0.0163878	0.0165602	0.91534	0.423377	2.65895	1.20693
635	0	28681.7	9347.05	0		0.0367635	0.344769	0.0584003	0.0201346	0.0176538	1.05495	0.53473	2.38413	1.42504
636	0	28691.7	9347.05	0		0.0297629	0.314369	0.0399269	0.0125518	0.0141052	0.823103	0.53393	2.19195	1.16778
637	0	28701.7	9347.05	0		0.0259397	0.256631	0.0455403	0.011687	0.180784	0.917865	0.503959	2.34053	1.19671
638	0	28711.7	9347.05	0		0.29277	0.242785	0.0542804	0.0131785	0.0148684	0.819839	0.472551	2.32278	1.33021
639	0	28721.7	9347.05	0		0.0322201	0.304817	0.040756	0.0124231	0.0111324	1.03221	0.531893	2.03892	1.26755
640	0	28731.7	9347.05	0		0.0357095	0.198843	0.0711274	0.0141432	0.0123272	1.06123	0.477355	2.19169	1.27344
641	0	28741.7	9347.05	0		0.0234596	0.429234	0.033815	0.0145145	0.00994516	1.34995	0.513545	2.12915	1.20517
642	0	28751.7	9347.05	0		0.0393396	0.436752	0.0340652	0.0148781	0.01233	1.11612	0.55591	2.06615	1.11157
643	0	28761.7	9347.05	0		0.0155028	0.542774	0.0142289	0.0077231	0.00647304	1.1036	0.50404	2.00893	1.21955
644	0	28771.7	9347.05	0		0.194061	0.51937	0.0132944	0.0069047	0.00625352	1.02129	0.501347	1.84899	1.11811
645	0	28781.7	9347.05	0		0.0119625	0.68456	0.0112728	0.0077169	0.00717272	0.995146	0.544371	2.22121	0.919884
646	0	28791.7	9347.05	0		0.183968	0.737647	0.0102422	0.00755512	0.007942	0.879911	0.638994	1.61723	1.3489
647	0	28801.7	9347.05	0		0.142168	0.632446	0.0120157	0.00759927	0.0881018	0.858017	0.56902	1.9286	1.17668
648	0	28811.7	9347.05	0		0.150468	0.463604	0.012751	0.00591141	0.00903008	0.605518	0.502158	1.97494	1.20815
649	0	28821.7	9347.05	0		0.165149	0.463294	0.0145353	0.00673411	0.00896549	0.694758	0.593957	1.89915	1.11814
650	0	28831.7	9347.05	0		0.12474	0.674968	0.00989053	0.00667579	0.00872532	0.707699	0.550083	1.98713	1.28429
651	0	28841.7	9347.05	0		0.167588	0.812294	0.0804766	0.0653707	0.00751064	0.7833	0.586112	1.7151	1.29141
652	0	28851.7	9347.05	0		0.235187	0.633816	0.0117915	0.00747363	0.00803462	0.860387	0.622121	2.37131	1.11022
653	0	28861.7	9347.05	0		0.131557	0.817595	0.0991246	0.0810438	0.0100714	0.798085	0.744931	1.779	0.995211
654	0	28871.7	9347.05	0		0.14548	0.557041	0.0156792	0.00873398	0.0101385	0.796827	0.770257	2.13126	1.28773
655	0	28881.7	9347.05	0		0.185075	0.532983	0.0143733	0.0076607	0.00878045	0.807011	0.607269	2.13292	1.05221
656	0	28891.7	9347.05	0		0.124292	0.636986	0.100511	0.0640241	0.00546436	0.983059	0.612983	2.77537	1.06794
657	0	28901.7	9347.05	0		0.0149895	0.848948	0.0125012	0.0106129	0.0096925	1.01281	0.529901	2.35357	1.01878
658	0	28911.7	9347.05	0		0.185863	1.05189	0.109118	0.11478	0.00655916	0.976891	0.828801	1.80905	1.44538
659	0	28921.7	9347.05	0		0.23517	0.724987	0.14971	0.108538	0.00849554	0.806156	0.808546	2.79238	1.00975
660	0	28931.7	9347.05	0		0.123064	0.740063	0.00900462	0.00666398	0.00735134	0.838484	0.922103	2.19874	1.38948
661	0	28941.7	9347.05	0		0.157948	0.608562	0.119458	0.0726977	0.00790981	0.81425	0.994776	1.65524	0.765372
662	0	28951.7	9347.05	0		0.0152404	0.560912	0.01493	0.00837442	0.00870624	0.889716	0.967886	1.92762	0.86891
663	0	28961.7	9347.05	0		0.00997175	0.893628	0.101647	0.090835	0.00682815	0.964913	0.934915	2.29312	0.850947
664	0	28971.7	9347.05	0		0.217955	0.634631	0.0128213	0.00813677	0.00748457	1.00557	0.644627	2.228	0.826163
665	0	28981.7	9347.05	0		0.0128633	0.681408	0.0115744	0.00788691	0.00908531	0.802962	0.769891	2.60812	0.943459
666	0	28991.7	9347.05	0		0.0139739	0.612967	0.015212	0.00932446	0.00924644	0.932775	0.863823	2.5776	0.643201
667	0	29001.7	9347.05	0		0.00975802	0.835874	0.00902106	0.00754047	0.00781108	0.892924	0.759604	20.0437	0.631835
668	0	29011.7	9347.05	0		0.171969	0.684003	0.0122554	0.00838275	0.00797062	0.972797	0.954841	1.9444	0.708686
669	0	29021.7	9347.05	0		0.182257	0.606914	0.00928405	0.00563462	0.00715975	0.727938	0.811363	3.02528	0.719843
670	0	29031.7	9347.05	0		0.0367418	0.277805	0.0592474	0.0164593	0.0200846	0.758011	1.20192	2.20871	0.670144
671	0	29041.7	9347.05	0		0.0669862	0.505381	0.0496254	0.0250797	0.0398066	0.582767	1.15001	2.44349	0.70301
672	0	29051.7	9347.05	0		0.0515555	0.216389	0.0713301	0.015435	0.0303471	0.470455	1.27627	2.1233	0.657044
673	0	29061.7	9347.05	0		0.0314384	0.328232	0.032798	0.0107654	0.0174262	0.571419	0.987406	2.21829	0.941261
674	0	29071.7	9347.05	0		0.238632	0.380842	0.0230615	0.00878278	0.0114651	0.708567	1.08437	2.04207	0.672782
675	0	29081.7	9347.05	0		0.0432307	0.425857	0.0412268	0.0175567	0.0232922	0.697204	1.19672	2.26248	0.631129
676	0	29091.7	9347.05	0		0.225969	0.519289	0.0128656	0.00668096	0.00989709	0.624395	1.02271	2.2451	0.825701
677	0	29101.7	9347.05	0		0.0246371	0.3585	0.0250081	0.00896542	0.0146413	0.566393	0.993235	2.1905	0.821249
678	0	29111.7	9347.05	0		0.166907	0.458202	0.016895	0.00774131	0.0141256	0.506914	1.20955	2.339	0.641891
679	0	29121.7	9347.05	0		0.0191608	0.672481	0.0150122	0.0100954	0.0141635	0.6593	1.30884	2.17359	0.787557
680	0	29131.7	9347.05	0		0.0106989	0.726802	0.00861946	0.00626464	0.0105941	0.546965	0.777196	24.4441	0.755422
681	0	29141.7	9347.05	0		0.15447	0.768492	0.105044	0.0807252	0.00672988	0.647785	1.29927	1.47716	7.6069
682	0	29151.7	9347.05	0		0.00923629	0.735374	0.00649533	0.0047765	0.00624392	0.707587	1.15307	1.74842	0.917896
683	0	29161.7	9347.05	0		0.0194664	0.754269	0.111366	0.0839997	0.00975566	0.684162	0.870591	2.80302	0.789129
684	0	28011.7	9337.05	0		0.015192	0.949797	0.129333	0.12284	0.00806375	0.677741	1.41197	2.92006	0.51185
685	0	28021.7	9337.05	0		0.346075	2.31521	0.201544	0.466617	0.00921411	1.11443	1.05628	2.77133	1.12047
686	0	28031.7	9337.05	0		0.218794	1.7874	0.146689	0.262191	0.00695952	1.32452	1.01287	2.79435	0.717094
687	0	28041.7	9337.05	0		0.182241	1.31572	0.0943318	0.124114	0.00797177	0.887554	1.18935	1.69346	0.955466
688	0	28051.7	9337.05	0		0.187458	0.949546	0.0734118	0.0697078	0.00692266	0.796639	0.961914	1.81364	0.0868562
689	0	28061.7	9337.05	0		0.20763	0.97063	0.144852	0.140598	0.00479926	0.963865	0.637975	2.29605	1.12953
690	0	28071.7	9337.05	0		0.132057	1.14461	0.127201	0.145595	0.00709234	0.983929	0.752308	14.3379	0.105805
691	0	28081.7	9337.05	0		0.10802	1.00042	0.134477	0.134534	0.00720418	0.925309	0.902692	1.98764	0.766142
692	0	28091.7	9337.05	0		0.129965	0.990515	0.0946859	0.0937878	0.00565932	1.13066	0.904007	18.3627	0.998903
693	0	28101.7	9337.05	0		0.219149	1.12447	0.117593	0.13223	0.00619751	0.967491	0.740975	1.83333	7.96227
694	0	28111.7	9337.05	0		0.130202	1.24941	0.0806196	0.100727	0.00711424	0.959907	1.18768	1.33661	0.774618
695	0	28121.7	9337.05	0		0.153116	1.30739	0.101282	0.132415	0.00746814	1.00985	0.614563	2.78896	0.141746
696	0	28131.7	9337.05	0		0.177606	1.38349	0.0990768	0.137071	0.00825764	0.949351	0.651237	2.03032	0.77673
697	0	28141.7	9337.05	0		0.183029	1.04688	0.0907658	0.0950207	0.0830882	0.978238	0.75761	2.72888	0.742775
698	0	28151.7	9337.05	0		0.215036	0.820625	0.00901453	0.00739755	0.00617918	1.10735	0.600838	2.01213	1.09438
699	0	28161.7	9337.05	0		0.0339019	0.375939	0.0376806	0.0141656	0.014293	0.916724	0.580355	1.86789	1.05206
700	0	28171.7	9337.05	0		0.168637	0.398507	0.0285269	0.0113682	0.0109203	0.962903	0.539164	2.24516	1.08146
701	0	28181.7	9337.05	0		0.218554	0.403415	0.0367554	0.0148277	0.0138561	0.989825	0.604698	1.90047	1.35166
702	0	28191.7	9337.05	0		0.0638239	0.0270805	0.718835	0.0194664	0.024571	0.732808	0.672182	1.75209	1.4293
703	0	28201.7	9337.05	0		0.212857	0.431209	0.0288367	0.0124346	0.0119922	0.959091	0.639094	2.01065	1.20271
704	0	28211.7	9337.05	0		0.184901	0.525307	0.155242	0.0815499	0.0091382	0.829783	0.666973	2.85664	1.26528
705	0	28221.7	9337.05	0		0.182453	0.623649	0.0133821	0.00834572	0.00970082	0.795761	0.605422	1.80168	1.38212
706	0	28231.7	9337.05	0		0.218487	0.557663	0.0167439	0.00933748	0.010584	0.816035	0.726356	1.84809	1.05629
707	0	28241.7	9337.05	0		0.20416	0.411924	0.219398	0.0903752	0.0130276	0.683116	0.529046	2.31078	1.45707
708	0	28251.7	9337.05	0		0.215239	0.460562	0.017272	0.00795483	0.00966069	0.761641	0.511114	2.27776	1.35159
709	0	28261.7	9337.05	0		0.174141	0.523053	0.0154995	0.00810703	0.00995859	0.752994	0.563948	2.13341	1.11553
710	0	28271.7	9337.05	0		0.160551	0.562469	0.0157556	0.00886202	0.00830765	0.986693	0.681317	2.13179	1.16778
711	0	28281.7	9337.05	0		0.1478	0.536963	0.0114293	0.00613711	0.00700908	0.809898	0.555129	2.78781	1.2902
712	0	28291.7	9337.05	0		0.0385975	0.0258001	0.718835	0.018546	0.0156972	1.09284	0.696991	1.45957	1.05377
713	0	28301.7	9337.05	0		0.0380776	0.137727	0.0950299	0.0130882	0.013791	0.877827	0.539214	2.0513	1.09903
714	0	28311.7	9337.05	0		0.206788	0.238315	0.0427601	0.0101904	0.0120487	0.78231	0.475472	1.85192	1.34326
715	0	28321.7	9337.05	0		0.175059	0.385669	0.0158011	0.00609401	0.00638467	0.882861	0.475151	2.02409	1.39906
716	0	28331.7	9337.05	0		0.213878	0.508588	0.0154618	0.00786367	0.00920964	0.789787	0.4613	3.20706	1.23399
717	0	28341.7	9337.05	0		0.256603	0.347646	0.0217796	0.00757158	0.00943452	0.742325	0.434647	2.50647	1.43086
718	0	28351.7	9337.05	0		0.215353	0.489615	0.0166713	0.00816253	0.0105038	0.718794	0.53637	2.25744	1.11819
719	0	28361.7	9337.05	0		0.215913	0.474939	0.0164107	0.0077941	0.00800729	0.900343	0.520039	1.74455	1.29706
720	0	28371.7	9337.05	0		0.241302	0.40898	0.0173478	0.0070949	0.0063706	1.03013	0.508086	1.64678	1.27998
721	0	28381.7	9337.05	0		0.177861	0.451086	0.0177207	0.00799356	0.00896439	0.824797	0.505026	2.31373	1.11058
722	0	28391.7	9337.05	0		0.10192	0.401507	0.0174797	0.0070182	0.00882339	0.73573	0.404409	2.35456	0.935238
723	0	28401.7	9337.05	0		0.222157	0.357358	0.0162273	0.00579897	0.00847615	0.632819	0.435296	2.16667	1.43577
724	0	28411.7	9337.05	0		0.155461	0.397443	0.126025	0.0500877	0.00823086	0.684175	0.534977	2.35512	1.21223
725	0	28421.7	9337.05	0		0.181743	0.4256	0.0164762	0.00701229	0.00861757	0.752667	0.459486	2.35221	1.08461
726	0	28431.7	9337.05	0		0.197741	0.499986	0.0120722	0.00603595	0.0071242	0.783676	0.474441	2.24704	1.26822
727	0	28441.7	9337.05	0		0.0104178	0.500909	0.0195197	0.00977762	0.00907485	0.9966	0.315453	3.24368	1.21744
728	0	28451.7	9337.05	0		0.171955	0.39826	0.0161795	0.00644366	0.0979857	1.07332	0.440594	2.57024	1.22962
729	0	28461.7	9337.05	0		0.11215	0.353087	0.0141578	0.00499893	0.0051275	0.901777	0.415267	2.15516	1.06635
730	0	28471.7	9337.05	0		0.157861	0.325584	0.0241061	0.00784857	0.00603999	1.20194	0.35104	2.51524	1.3426
731	0	28481.7	9337.05	0		0.0589453	0.258323	0.0582609	0.0150501	0.0142558	0.976507	0.400022	2.85124	1.51309
732	0	28491.7	9337.05	0		0.0324789	0.210769	0.0565553	0.0119201	0.0120581	0.914389	0.409727	2.60614	1.23053
733	0	28501.7	9337.05	0		0.039925	0.204075	0.0764153	0.0155944	0.0137373	1.05002	0.428586	2.21909	1.34833
734	0	28511.7	9337.05	0		0.159787	0.382225	0.0157103	0.00600485	0.081567	0.960538	0.455775	2.14068	1.42324
735	0	28521.7	9337.05	0		0.0130195	0.40923	0.143204	0.0586034	0.00733024	0.879003	0.446884	2.32166	1.22763
736	0	28531.7	9337.05	0		0.0248495	0.203013	0.053616	0.0108847	0.0125437	0.80264	0.403449	2.43937	1.29969
737	0	28541.7	9337.05	0		0.145865	0.271264	0.0334949	0.00908597	0.0100351	0.837482	0.412465	2.39454	1.19488
738	0	28551.7	9337.05	0		0.14459	0.480667	0.0108292	0.00520525	0.0637653	0.958602	0.454826	2.26658	1.01956
739	0	28561.7	9337.05	0		0.110945	0.354257	0.0248076	0.00878827	0.00982545	0.82733	0.507698	1.77917	1.17073
740	0	28571.7	9337.05	0		0.15988	0.347459	0.0183349	0.00637064	0.0741767	0.904731	0.426515	1.88811	1.17937
741	0	28581.7	9337.05	0		0.177971	0.540355	0.0100024	0.00540483	0.00521543	0.95856	0.513582	2.29729	1.03017
742	0	28591.7	9337.05	0		0.164114	0.624927	0.113767	0.0710959	0.00445512	0.954037	0.418628	2.383	1.3959
743	0	28601.7	9337.05	0		0.154917	0.501124	0.00983024	0.00492617	0.0494566	1.21977	0.48568	1.86548	1.02903
744	0	28611.7	9337.05	0		0.15944	0.41769	0.0182147	0.00760809	0.00508784	1.38315	0.446259	1.91222	1.09566
745	0	28621.7	9337.05	0		0.0103311	0.493067	0.0117719	0.00580434	0.00373291	1.43824	0.439057	2.54305	1.11569
746	0	28631.7	9337.05	0		0.0197092	0.363055	0.0235952	0.00856635	0.0069155	1.14578	0.384578	2.63305	1.04486
747	0	28641.7	9337.05	0		0.0366864	0.355138	0.0445841	0.0158335	0.0149352	0.980601	0.420254	2.91656	1.50502
748	0	28651.7	9337.05	0		0.0254939	0.24945	0.049735	0.0124064	0.0145285	0.789864	0.424124	2.55195	1.31501
749	0	28661.7	9337.05	0		0.0385791	0.301363	0.0616082	0.0185665	0.0194415	0.883336	0.443199	2.64737	1.46073
750	0	28671.7	9337.05	0		0.425089	0.345311	0.0466444	0.0161068	0.0147194	1.01215	0.500971	2.35671	1.35978
751	0	28681.7	9337.05	0		0.026313	0.336509	0.0355122	0.0119502	0.0109508	1.00938	0.488729	2.31401	1.27383
752	0	28691.7	9337.05	0		0.0271655	0.26127	0.0352911	0.00922051	0.00910975	0.936215	0.536491	2.14148	1.18822
753	0	28701.7	9337.05	0		0.0294002	0.324537	0.0441282	0.0143212	0.0115228	1.14961	0.432991	2.5512	1.09826
754	0	28711.7	9337.05	0		0.0298075	0.290404	0.0481171	0.0139734	0.0145093	0.890809	0.409052	2.50568	1.3082
755	0	28721.7	9337.05	0		0.0337667	0.318656	0.0446971	0.014243	0.00868899	1.51621	0.46261	2.18932	1.37414
756	0	28731.7	9337.05	0		0.0152227	0.376798	0.024235	0.00913168	0.00735973	1.14767	0.457328	2.68422	1.55634
757	0	28741.7	9337.05	0		0.251503	0.482819	0.0185455	0.00895415	0.00655151	1.26418	0.542143	2.08035	1.51411
758	0	28751.7	9337.05	0		0.0228936	0.220552	0.0560507	0.0123621	0.0129559	0.882573	0.458835	2.67081	1.37494
759	0	28761.7	9337.05	0		0.179084	0.675261	0.0134643	0.00909189	0.00785239	1.07098	0.547301	2.16061	1.1854
760	0	28771.7	9337.05	0		0.226729	0.465084	0.0174151	0.00809947	0.0082108	0.912428	0.509489	1.90964	1.16718
761	0	28781.7	9337.05	0		0.0331989	0.414449	0.0437642	0.0181381	0.0196747	0.852726	0.489353	1.95055	1.21845
762	0	28791.7	9337.05	0		0.204422	0.498917	0.0170176	0.00849037	0.0100194	0.78381	0.515315	1.58537	1.2476
763	0	28801.7	9337.05	0		0.15632	0.501925	0.0194664	0.00977067	0.0115266	0.784065	0.558358	2.05733	1.11621
764	0	28811.7	9337.05	0		0.122988	0.366103	0.0198432	0.00726465	0.00904467	0.742932	0.533693	1.91942	1.20382
765	0	28821.7	9337.05	0		0.20745	0.608499	0.0114899	0.00699159	0.0090318	0.716026	0.458907	1.89493	1.17968
766	0	28831.7	9337.05	0		0.167688	0.680084	0.0110195	0.00749421	0.00905439	0.765586	0.672721	1.79735	1.35018
767	0	28841.7	9337.05	0		0.227456	0.557048	0.0140391	0.00782046	0.00911748	0.793388	0.507355	2.16562	1.26486
768	0	28851.7	9337.05	0		0.219566	0.681011	0.0102885	0.00700656	0.00867254	0.747284	0.571742	2.05777	1.2024
769	0	28861.7	9337.05	0		0.205871	0.687335	0.0117986	0.0081096	0.00835988	0.897279	0.573067	2.03277	1.05388
770	0	28871.7	9337.05	0		0.181344	0.546002	0.145666	0.0795338	0.00844393	0.737473	0.573146	2.23803	1.08366
771	0	28881.7	9337.05	0		0.15325	0.672281	0.0859529	0.0577845	0.00680438	0.862745	0.590803	2.19414	1.25647
772	0	28891.7	9337.05	0		0.0234664	0.535244	0.018842	0.010085	0.00845665	1.10308	0.648694	1.85224	0.896294
773	0	28901.7	9337.05	0		0.178496	0.608294	0.0137642	0.00837266	0.00837711	0.924478	0.683233	2.18783	1.0401
774	0	28911.7	9337.05	0		0.168749	0.675285	0.118572	0.0800696	0.00570046	0.923273	0.832329	1.49909	0.985973
775	0	28921.7	9337.05	0		0.184276	0.780581	0.112147	0.0875401	0.0065593	0.852473	0.670829	2.3695	0.877129
776	0	28931.7	9337.05	0		0.157111	0.858688	0.0102459	0.00879808	0.00791898	1.02765	0.877508	2.18914	1.37633
777	0	28941.7	9337.05	0		0.196486	0.659251	0.159801	0.105349	0.00542795	1.02084	0.772684	1.76436	1.05497
778	0	28951.7	9337.05	0		0.128486	0.701216	0.0939458	0.0658763	0.00541632	0.895355	0.833674	2.29665	0.757783
779	0	28961.7	9337.05	0		0.0247088	0.375627	0.0255216	0.0095866	0.011093	0.799363	0.835748	1.78245	1.05075
780	0	28971.7	9337.05	0		0.0161312	0.523884	0.0173122	0.00906955	0.00752436	1.11492	0.745406	1.68332	1.11438
781	0	28981.7	9337.05	0		0.0161902	0.43801	0.0186701	0.00817771	0.00881911	0.857698	0.715084	2.12161	1.11587
782	0	28991.7	9337.05	0		0.0151004	0.528745	0.261916	0.138487	0.00767414	0.978294	0.753683	2.68005	1.03951
783	0	29001.7	9337.05	0		0.0114817	0.72865	0.0118733	0.00865145	0.00825564	0.969317	0.99054	20.75	1.35637
784	0	29011.7	9337.05	0		0.0154519	0.724754	0.0149851	0.0108605	0.0103088	0.974473	0.569564	2.75733	0.957421
785	0	29021.7	9337.05	0		0.20766	0.662114	0.00987831	0.00654057	0.00770196	0.785493	1.03734	2.99697	0.849378
786	0	29031.7	9337.05	0		0.196649	0.750243	0.00939897	0.00705151	0.00845978	0.770994	1.11669	2.04771	0.781178
787	0	29041.7	9337.05	0		0.294307	0.603497	0.0136986	0.00826708	0.0100518	0.760737	0.909154	1.86749	1.05227
788	0	29051.7	9337.05	0		0.0209504	0.41611	0.0240575	0.0100106	0.012614	0.734059	1.22656	1.93382	0.959018
789	0	29061.7	9337.05	0		0.034009	0.440196	0.0304901	0.0134216	0.0191147	0.649477	1.04173	2.43796	0.794635
790	0	29071.7	9337.05	0		0.0373145	0.423769	0.0335816	0.0142308	0.021012	0.626455	1.20604	2.02204	0.724715
791	0	29081.7	9337.05	0		0.025826	0.487727	0.0189746	0.00925441	0.0103884	0.824004	0.985585	2.53977	0.805015
792	0	29091.7	9337.05	0		0.0241717	0.517518	0.0148391	0.00767947	0.00879899	0.807284	1.07643	2.04019	0.57913
793	0	29101.7	9337.05	0		0.0366794	0.540783	0.284066	0.153618	0.0332731	0.479928	1.18822	2.24715	0.691588
794	0	29111.7	9337.05	0		0.0264488	0.677137	0.0201452	0.0136411	0.0204721	0.61633	0.983963	2.88415	0.650467
795	0	29121.7	9337.05	0		0.0205138	0.43723	0.0171067	0.00747958	0.0111209	0.622104	1.00036	2.49878	0.815608
796	0	29131.7	9337.05	0		0.0147032	0.671853	0.0115374	0.00775143	0.0117157	0.611983	1.20498	2.39828	0.621748
797	0	29141.7	9337.05	0		0.218414	0.643442	0.108566	0.0698557	0.0106082	0.697608	0.997274	2.12329	0.77028
798	0	29151.7	9337.05	0		0.338482	0.684359	0.175843	0.12034	0.0093876	0.813489	0.995626	2.41194	0.668421
799	0	29161.7	9337.05	0		0.0179058	0.625857	0.0111102	0.00695339	0.00761881	0.844184	0.803688	2.67929	0.606062
800	0	29171.7	9337.05	0		0.0322378	0.511293	0.021694	0.011092	0.014285	0.71822	1.02184	3.08311	0.631678
801	0	29181.7	9337.05	0		0.0355751	0.653658	0.0197267	0.0128945	0.0174421	0.683809	1.13677	2.48099	0.76863
802	0	29191.7	9337.05	0		0.0390057	0.836728	0.170161	0.142378	0.0296147	0.573143	1.20372	2.27508	0.870413
803	0	27981.7	9327.05	0		0.218383	1.8311	0.140118	0.256571	0.0739365	1.13315	0.829471	24.4214	0.928916
804	0	27991.7	9327.05	0		0.236738	0.916599	0.0996147	0.0913067	0.0128658	0.755699	0.956555	2.15453	0.895819
805	0	28001.7	9327.05	0		0.0265101	0.818088	0.202817	0.165922	0.0127239	0.782067	1.01594	2.54941	0.876545
806	0	28011.7	9327.05	0		0.218391	1.53376	0.151092	0.231738	0.0052409	1.13719	0.859859	2.13266	0.799617
807	0	28021.7	9327.05	0		0.158489	1.55541	0.129167	0.200908	0.00487767	1.04233	0.95625	2.71899	1.10359
808	0	28031.7	9327.05	0		0.259383	1.76557	0.156544	0.276389	0.00548066	1.26013	0.927153	2.0179	0.79984
809	0	28041.7	9327.05	0		0.230863	1.12027	0.145102	0.162554	0.00668536	1.04423	0.869771	1.90683	0.856774
810	0	28051.7	9327.05	0		0.157861	0.827852	0.106896	0.0884942	0.00742505	0.983364	0.84127	1.96283	0.773782
811	0	28061.7	9327.05	0		0.211761	0.620545	0.188585	0.117026	0.0901653	0.931981	0.714667	2.28113	0.749364
812	0	28071.7	9327.05	0		0.220038	0.582649	0.0100445	0.0058524	0.00594451	0.910638	0.810609	2.28016	0.657425
813	0	28081.7	9327.05	0		0.0158849	0.760928	0.0138117	0.0105097	0.0093814	1.03622	0.700117	2.30518	0.611916
814	0	28091.7	9327.05	0		0.0253302	0.62488	0.018125	0.011326	0.00900494	1.16338	0.997766	2.08247	0.960662
815	0	28101.7	9327.05	0		0.240516	1.17793	0.103919	0.12241	0.00557114	1.46694	0.940897	2.84451	1.45639
816	0	28111.7	9327.05	0		0.19533	1.19199	0.0061703	0.00735494	0.00696221	0.977146	0.718857	2.09705	0.792682
817	0	28121.7	9327.05	0		0.248507	1.16544	0.0956685	0.111496	0.00723274	1.10452	0.644084	2.63256	1.04845
818	0	28131.7	9327.05	0		0.0120235	0.93595	0.158962	0.14878	0.00929294	0.861545	0.642144	2.27409	1.15947
819	0	28141.7	9327.05	0		0.144029	1.13788	0.0934008	0.106278	0.0071206	1.16085	0.527507	2.04456	1.26297
820	0	28151.7	9327.05	0		0.244334	0.990762	0.122028	0.120901	0.00682075	0.964136	0.475988	1.86188	1.05844
821	0	28161.7	9327.05	0		0.201547	0.655089	0.0128168	0.00839615	0.00967182	0.80297	0.581958	2.25643	1.26731
822	0	28171.7	9327.05	0		0.0447482	0.199113	0.101629	0.0202357	0.0204777	0.914039	0.567909	1.86671	1.27397
823	0	28181.7	9327.05	0		0.0372592	0.330119	0.0548537	0.0181083	0.0178966	0.93591	0.513025	2.4891	1.2938
824	0	28191.7	9327.05	0		0.015096	0.409665	0.0202776	0.00830701	0.00663034	1.15887	0.544896	2.65068	1.50856
825	0	28201.7	9327.05	0		0.0654023	0.322826	0.0614007	0.0198218	0.020271	0.904471	0.604548	2.2033	1.30258
826	0	28211.7	9327.05	0		0.025484	0.244449	0.0535143	0.0130816	0.0142816	0.847248	0.635783	1.78178	1.17427
827	0	28221.7	9327.05	0		0.179822	0.440396	0.0164459	0.00724271	0.0078101	0.857772	0.541491	1.92511	1.31545
828	0	28231.7	9327.05	0		0.112391	0.486436	0.0139568	0.0067891	0.00638157	0.984039	0.482387	2.11478	1.19451
829	0	28241.7	9327.05	0		0.197109	0.444898	0.0163956	0.00729439	0.00927693	0.727297	0.462801	2.2116	1.56017
830	0	28251.7	9327.05	0		0.198465	0.471203	0.0177485	0.00836313	0.0116337	0.664933	0.530005	2.02839	1.11143
831	0	28261.7	9327.05	0		0.171006	0.441968	0.0221169	0.00977497	0.0124993	0.723362	0.616565	1.94093	1.05043
832	0	28271.7	9327.05	0		0.00903712	0.377027	0.0225923	0.0085179	0.00923793	0.852875	0.426382	2.1662	1.3936
833	0	28281.7	9327.05	0		0.144778	0.430208	0.0136392	0.00586771	0.00701215	0.774008	0.606134	2.8722	1.34756
834	0	28291.7	9327.05	0		0.0141449	0.29171	0.0263131	0.00767579	0.00853009	0.832332	0.491354	2.2904	1.13863
835	0	28301.7	9327.05	0		0.0195592	0.29074	0.0428824	0.0124676	0.0150386	0.76684	0.467094	1.93211	1.40092
836	0	28311.7	9327.05	0		0.152005	0.389745	0.0222995	0.00869114	0.00979855	0.820432	0.536834	1.99075	1.41534
837	0	28321.7	9327.05	0		0.179241	0.424842	0.192876	0.0819416	0.00836658	0.758951	0.513965	1.96655	1.06355
838	0	28331.7	9327.05	0		0.178064	0.3126	0.02385	0.00745551	0.00940577	0.73318	0.43609	2.82988	1.20104
839	0	28341.7	9327.05	0		0.230679	0.439505	0.0171834	0.00755216	0.111196	0.824323	0.400132	1.87061	1.1041
840	0	28351.7	9327.05	0		0.195797	0.392929	0.0161932	0.00636279	0.00789504	0.745454	0.469387	2.6581	1.24833
841	0	28361.7	9327.05	0		0.193666	0.381373	0.018666	0.0071187	0.00998062	0.659737	0.431764	2.65892	1.09505
842	0	28371.7	9327.05	0		0.171332	0.454118	0.0188634	0.00856621	0.0113057	0.700841	0.449625	1.96568	1.30201
843	0	28381.7	9327.05	0		0.193607	0.392728	0.207566	0.0815169	0.0100346	0.752666	0.541166	2.24767	1.25864
844	0	28391.7	9327.05	0		0.192663	0.384577	0.0193528	0.00744264	0.00837795	0.821706	0.476417	1.94477	1.17225
845	0	28401.7	9327.05	0		0.20631	0.40162	0.0168706	0.00677554	0.009347	0.670501	0.494352	2.36843	1.19067
846	0	28411.7	9327.05	0		0.22634	0.488193	0.203415	0.0993057	0.0123375	0.631151	0.50325	1.87633	1.33892
847	0	28421.7	9327.05	0		0.163433	0.458723	0.0160453	0.00736035	0.0120638	0.564341	0.441237	2.00945	0.987158
848	0	28431.7	9327.05	0		0.135611	0.372108	0.0159835	0.00594759	0.00803179	0.684947	0.480068	2.00546	1.31448
849	0	28441.7	9327.05	0		0.222069	0.261787	0.0285258	0.00746768	0.00766946	0.900634	0.469299	2.08309	1.13035
850	0	28451.7	9327.05	0		0.0320529	0.210352	0.0621488	0.0130731	0.0160595	0.752964	0.462004	2.14067	1.25655
851	0	28461.7	9327.05	0		0.222664	0.201555	0.0430616	0.00867931	0.00847062	0.947757	0.456017	2.29466	1.37577
852	0	28471.7	9327.05	0		0.0159977	0.295134	0.0242551	0.0071585	0.00613904	1.07857	0.500347	2.66359	1.32583
853	0	28481.7	9327.05	0		0.36465	0.193773	0.0524022	0.0101541	0.00817911	1.14832	0.413249	2.51834	1.25996
854	0	28491.7	9327.05	0		0.043378	0.14474	0.105958	0.0153364	0.015138	0.937091	0.463294	2.22677	1.30747
855	0	28501.7	9327.05	0		0.0319659	0.207172	0.0449454	0.00931145	0.0118158	0.728925	0.431289	2.30432	1.28216
856	0	28511.7	9327.05	0		0.248978	0.219692	0.0438986	0.00964417	0.00866768	1.02918	0.406737	2.31562	1.31159
857	0	28521.7	9327.05	0		0.179807	0.256152	0.039938	0.0102302	0.00855743	1.10578	0.360721	2.49797	1.47433
858	0	28531.7	9327.05	0		0.0540508	0.237255	0.0887348	0.0210527	0.020675	0.941868	0.443498	2.45974	1.32716
859	0	28541.7	9327.05	0		0.24177	0.253158	0.0582867	0.0147557	0.0188946	0.722354	0.419682	2.30716	1.40659
860	0	28551.7	9327.05	0		0.163482	0.220754	0.0398835	0.00880446	0.0115971	0.702235	0.451037	1.95301	1.34003
861	0	28561.7	9327.05	0		0.189968	0.252574	0.239001	0.0603654	0.00872668	0.708382	0.473164	2.2186	1.16321
862	0	28571.7	9327.05	0		0.147269	0.348316	0.017332	0.00603702	0.0733305	0.865699	0.454522	1.99307	1.28224
863	0	28581.7	9327.05	0		0.113945	0.543942	0.00964845	0.00524819	0.00487173	0.996447	0.508141	1.91672	1.1272
864	0	28591.7	9327.05	0		0.151824	0.576865	0.113876	0.0656911	0.00427747	1.06464	0.361977	2.47088	1.02242
865	0	28601.7	9327.05	0		0.0166437	0.469169	0.0157963	0.00741114	0.0908874	1.27431	0.428569	2.46812	1.08859
866	0	28611.7	9327.05	0		0.154371	0.395441	0.0172115	0.00680611	0.0404939	1.14551	0.475017	1.96993	1.18042
867	0	28621.7	9327.05	0		0.18642	0.486636	0.0109174	0.00531282	0.00372352	1.31977	0.495521	2.06356	0.909103
868	0	28631.7	9327.05	0		0.240896	0.428177	0.0190848	0.00817168	0.00597304	1.26545	0.343206	2.86297	1.29015
869	0	28641.7	9327.05	0		0.0210626	0.308085	0.0279377	0.0086072	0.00825484	0.964452	0.358833	2.72641	1.33867
870	0	28651.7	9327.05	0		0.0274537	0.386294	0.0291136	0.0112464	0.0129921	0.800688	0.477991	2.23765	1.21608
871	0	28661.7	9327.05	0		0.0311037	0.318947	0.0366777	0.0116983	0.0138604	0.780679	0.517483	2.19678	1.19293
872	0	28671.7	9327.05	0		0.0124441	0.3543	0.023897	0.00846672	0.0070582	1.10955	0.517239	2.01503	1.47418
873	0	28681.7	9327.05	0		0.00942139	0.523531	0.0118629	0.00621061	0.00498584	1.15219	0.432936	2.33108	1.43656
874	0	28691.7	9327.05	0		0.0369265	0.251234	0.0497575	0.0125008	0.00974608	1.18641	0.512221	2.23379	1.19677
875	0	28701.7	9327.05	0		0.0353471	0.280594	0.0600635	0.0168534	0.0188095	0.828777	0.394478	2.3714	1.26188
876	0	28711.7	9327.05	0		0.0382935	0.315707	0.0523435	0.0165252	0.0153424	0.99628	0.42313	2.42174	1.34265
877	0	28721.7	9327.05	0		0.0119391	0.340012	0.0216502	0.00736132	0.0771972	1.24755	0.470775	2.53367	1.31757
878	0	28731.7	9327.05	0		0.108042	0.401647	0.0164055	0.00658922	0.0863034	0.99387	0.508702	2.03275	1.12343
879	0	28741.7	9327.05	0		0.00989292	0.379946	0.0190242	0.00722816	0.00817874	0.817466	0.376544	2.44658	1.33321
880	0	28751.7	9327.05	0		0.19018	0.490171	0.0135958	0.00666429	0.00672039	0.917248	0.541468	1.76833	1.30145
881	0	28761.7	9327.05	0		0.214304	0.410216	0.0178784	0.00733403	0.0078173	0.867788	0.503711	2.1897	1.11488
882	0	28771.7	9327.05	0		0.0136908	0.395431	0.0215637	0.00852694	0.00985021	0.800711	0.486533	2.0101	1.1618
883	0	28781.7	9327.05	0		0.156273	0.323485	0.0305422	0.00987993	0.0127007	0.71954	0.469908	1.92186	1.14481
884	0	28791.7	9327.05	0		0.166513	0.321475	0.0263056	0.00845661	0.0112945	0.692561	0.503142	1.77546	1.31966
885	0	28801.7	9327.05	0		0.0280441	0.29145	0.0341306	0.00994736	0.0114893	0.800834	0.422318	1.97568	1.25203
886	0	28811.7	9327.05	0		0.0336286	0.200865	0.0511275	0.0102698	0.0108142	0.8784	0.532635	2.12221	1.37929
887	0	28821.7	9327.05	0		0.14216	0.368064	0.0238329	0.00877203	0.00894942	0.906635	0.506441	2.4067	1.18886
888	0	28831.7	9327.05	0		0.17144	0.591482	0.0112187	0.00663565	0.00741328	0.827944	0.458366	2.23144	1.03343
889	0	28841.7	9327.05	0		0.136915	0.53319	0.139847	0.074565	0.00923977	0.666358	0.607935	2.03611	1.28886
890	0	28851.7	9327.05	0		0.11397	0.616794	0.0141223	0.00871056	0.0103116	0.781354	0.520682	2.37999	1.27556
891	0	28861.7	9327.05	0		0.165431	0.663399	0.014839	0.00984415	0.0121995	0.746387	0.494984	2.29276	1.09951
892	0	28871.7	9327.05	0		0.0110852	0.525659	0.0141433	0.00743455	0.0102985	0.667739	0.49053	2.21122	1.28046
893	0	28881.7	9327.05	0		0.195849	0.597773	0.0119304	0.00713165	0.0084047	0.784866	0.507456	2.61386	1.49902
894	0	28891.7	9327.05	0		0.1937	0.66277	0.165553	0.109724	0.00866459	0.882271	0.477855	2.33748	0.99089
895	0	28901.7	9327.05	0		0.0392	0.232794	0.0643976	0.0149914	0.0213666	0.648985	0.670968	1.75165	1.06406
896	0	28911.7	9327.05	0		0.177662	0.592679	0.12011	0.0711867	0.00808014	0.906842	0.716935	1.8487	1.01632
897	0	28921.7	9327.05	0		0.139391	0.743124	0.00980356	0.00728526	0.00772345	0.872491	0.7572	2.95278	1.02295
898	0	28931.7	9327.05	0		0.223658	0.77813	0.0111609	0.00868466	0.00755946	1.06265	0.686609	2.10684	1.14026
899	0	28941.7	9327.05	0		0.132456	0.774818	0.00868664	0.00673056	0.00546495	1.13918	0.592662	2.0517	1.10244
900	0	28951.7	9327.05	0		0.174201	0.536387	0.00908769	0.00487452	0.0649029	0.979383	0.609523	2.77025	0.630982
901	0	28961.7	9327.05	0		0.183521	0.502108	0.0145423	0.00730181	0.00769277	0.877961	0.79171	1.90601	1.04072
902	0	28971.7	9327.05	0		0.0465591	0.360992	0.0529848	0.0191271	0.0199131	0.88846	0.681549	1.82001	1.16223
903	0	28981.7	9327.05	0		0.0298793	0.303959	0.0402609	0.0122377	0.0139859	0.809348	0.710575	1.97872	1.09525
904	0	28991.7	9327.05	0		0.030455	0.37652	0.0358316	0.0134913	0.0170382	0.732417	0.650747	2.18197	1.29814
905	0	29001.7	9327.05	0		0.173936	0.487801	0.0149997	0.00731686	0.00702074	0.963983	0.572324	2.02696	1.15056
906	0	29011.7	9327.05	0		0.00887886	0.54382	0.0121841	0.00662594	0.00761835	0.804477	0.781562	2.17214	0.794743
907	0	29021.7	9327.05	0		0.145196	0.735745	0.00960031	0.00706338	0.00801028	0.815628	0.745948	2.52912	1.392
908	0	29031.7	9327.05	0		0.164804	0.731371	0.0805572	0.0589172	0.00704237	0.776518	0.616421	2.49625	0.989413
909	0	29041.7	9327.05	0		0.176057	0.787962	0.00813214	0.00640781	0.00762056	0.777768	0.785465	2.19022	0.849494
910	0	29051.7	9327.05	0		0.176003	0.803374	0.00674291	0.00541707	0.00642117	0.78033	0.865301	3.63155	1.02598
911	0	29061.7	9327.05	0		0.158284	0.641522	0.00692572	0.004443	0.00502402	0.817999	0.693478	2.02576	1.26827
912	0	29071.7	9327.05	0		0.185142	0.425044	0.0163903	0.00696658	0.00754839	0.853675	0.907669	1.7445	0.894164
913	0	29081.7	9327.05	0		0.0340125	0.629319	0.0242579	0.0152659	0.0256102	0.551364	1.06502	2.01599	0.849096
914	0	29091.7	9327.05	0		0.0248739	0.732806	0.0188682	0.0138268	0.0228175	0.560505	0.832235	2.68879	0.788464
915	0	29101.7	9327.05	0		0.027498	0.570647	0.0256376	0.01463	0.0265406	0.509873	0.992833	2.25827	0.71428
916	0	29111.7	9327.05	0		0.0226017	0.437938	0.0154973	0.00678684	0.00932969	0.672865	0.964421	2.72943	0.833304
917	0	29121.7	9327.05	0		0.170191	0.58972	0.0138853	0.00818842	0.0119996	0.631189	0.974581	2.52713	0.776988
918	0	29131.7	9327.05	0		0.025507	0.616807	0.205517	0.126764	0.0133095	0.706053	0.942805	2.67935	0.741857
919	0	29141.7	9327.05	0		0.0391368	0.368205	0.0440948	0.0162359	0.0331566	0.452934	1.10253	2.43665	0.740293
920	0	29151.7	9327.05	0		0.0519189	0.527441	0.0259348	0.0136791	0.0222303	0.569165	1.13501	2.51451	0.857349
921	0	29161.7	9327.05	0		0.0354734	0.563282	0.343265	0.193355	0.0338002	0.477557	1.00199	2.61708	0.715412
922	0	29171.7	9327.05	0		0.0146223	0.525074	0.0108896	0.00571783	0.00662651	0.798131	0.99055	2.97462	0.671173
923	0	29181.7	9327.05	0		0.0243099	0.548767	0.0218182	0.0119731	0.0150444	0.736136	0.93232	2.69677	0.517594
924	0	29191.7	9327.05	0		0.0232029	0.888728	0.0152414	0.0135455	0.0215915	0.580282	1.11174	2.73658	0.605039
925	0	29201.7	9327.05	0		0.0308847	0.822865	0.0146048	0.0120178	0.0186177	0.597071	1.02783	2.65636	0.735375
926	0	29211.7	9327.05	0		0.0206328	1.03999	0.0115548	0.0120169	0.00967402	1.14899	1.21415	2.57396	0.601631
927	0	27951.7	9317.05	0		0.0141732	1.05031	0.00881759	0.00926117	0.00963864	0.888747	0.695522	28.0816	0.112655
928	0	27961.7	9317.05	0		0.198989	1.73911	0.13354	0.23224	0.00807834	0.992769	0.721253	2.7316	1.50484
929	0	27971.7	9317.05	0		0.0111215	1.6167	0.160808	0.259979	0.00929843	1.07247	0.92044	1.63884	0.0960386
930	0	27981.7	9317.05	0		0.15276	1.02748	0.110892	0.11394	0.00721688	0.865398	0.960939	2.37934	0.870114
931	0	27991.7	9317.05	0		0.0319457	0.897723	0.0141732	0.0127236	0.0150924	0.779792	0.988868	2.58847	0.768734
932	0	28001.7	9317.05	0		0.0468942	0.49584	0.0292692	0.0145129	0.0150596	0.891389	1.08581	2.3188	0.837588
933	0	28011.7	9317.05	0		0.0200855	1.20946	0.0142459	0.0172298	0.0126526	1.25958	0.804699	19.8532	8.85608
934	0	28021.7	9317.05	0		0.0227395	1.09836	0.0106184	0.0116629	0.0105681	1.02079	1.14545	1.97961	0.753868
935	0	28031.7	9317.05	0		0.0188665	1.07057	0.010934	0.0117056	0.0118756	0.911724	0.98043	2.81025	0.681332
936	0	28041.7	9317.05	0		0.0127376	0.901263	0.00979684	0.00882952	0.00805997	1.01328	0.910162	2.40288	0.680844
937	0	28051.7	9317.05	0		0.0331363	0.477367	0.0251137	0.0119884	0.0111172	0.997458	0.900095	2.04582	0.855344
938	0	28061.7	9317.05	0		0.0559316	0.415575	0.0460544	0.0191391	0.0255954	0.69165	0.956281	1.97446	0.961965
939	0	28071.7	9317.05	0		0.0493494	0.452689	0.04569	0.0206833	0.0244304	0.783102	1.03017	1.98412	0.982599
940	0	28081.7	9317.05	0		0.0620762	0.417075	0.0528624	0.0220476	0.0302828	0.673431	1.00284	2.16061	0.811117
941	0	28091.7	9317.05	0		0.0304321	0.475629	0.0286213	0.0136131	0.0127453	0.987954	1.01572	2.39709	0.840222
942	0	28101.7	9317.05	0		0.180439	0.81394	0.104152	0.0847734	0.00584431	1.11148	0.787796	2.07146	0.871724
943	0	28111.7	9317.05	0		0.175594	0.75111	0.101445	0.0761967	0.00622293	1.00912	0.68613	1.91488	0.942894
944	0	28121.7	9317.05	0		0.168099	1.00758	0.00747043	0.00752705	0.00601601	1.15729	0.604174	1.78194	0.747504
945	0	28131.7	9317.05	0		0.275224	1.0197	0.100695	0.102679	0.0050569	1.32622	0.707643	1.76519	0.867715
946	0	28141.7	9317.05	0		0.143936	0.879045	0.0986233	0.0866943	0.00423415	1.21389	0.572255	1.75783	1.22795
947	0	28151.7	9317.05	0		0.205535	0.766567	0.00784277	0.006012	0.00580676	0.957664	0.721019	2.00303	1.53119
948	0	28161.7	9317.05	0		0.249538	0.579153	0.0171473	0.00993092	0.010954	0.838578	0.618762	1.87997	1.08603
949	0	28171.7	9317.05	0		0.028917	0.291385	0.042635	0.0124232	0.0173244	0.66329	0.531124	1.88218	1.41874
950	0	28181.7	9317.05	0		0.164484	0.464543	0.0152103	0.00706586	0.00667398	0.979283	0.506273	2.46227	1.2683
951	0	28191.7	9317.05	0		0.172481	0.416013	0.0187427	0.00779721	0.00813209	0.88688	0.407261	2.5011	0.913319
952	0	28201.7	9317.05	0		0.191219	0.365405	0.0230233	0.00841281	0.00751499	1.03548	0.504116	2.16428	1.21003
953	0	28211.7	9317.05	0		0.0294442	0.279354	0.0425239	0.0118792	0.0123474	0.889901	0.523456	1.89708	1.41389
954	0	28221.7	9317.05	0		0.226233	0.306722	0.0268631	0.00823951	0.00886684	0.859528	0.52848	1.76745	1.30301
955	0	28231.7	9317.05	0		0.235558	0.356364	0.0240891	0.00858448	0.00781004	1.01669	0.50123	2.65419	1.03957
956	0	28241.7	9317.05	0		0.0111852	0.352473	0.02194	0.00773328	0.00926151	0.772341	0.559199	2.22966	0.965948
957	0	28251.7	9317.05	0		0.0180848	0.252946	0.0325503	0.00823347	0.00909232	0.837598	0.383295	2.25945	1.18773
958	0	28261.7	9317.05	0		0.181844	0.286257	0.0297339	0.00851153	0.0105097	0.749108	0.402522	1.97362	1.22342
959	0	28271.7	9317.05	0		0.155561	0.383884	0.0177841	0.00682701	0.00866227	0.728999	0.428378	1.94105	1.36407
960	0	28281.7	9317.05	0		0.143986	0.286563	0.0277284	0.00794591	0.011383	0.645676	0.446801	2.10594	1.42601
961	0	28291.7	9317.05	0		0.0262923	0.163361	0.0811974	0.0132645	0.0160629	0.763825	0.504347	1.89064	1.38789
962	0	28301.7	9317.05	0		0.0240296	0.176677	0.0596255	0.0105345	0.0147834	0.659121	0.466787	2.09504	1.48315
963	0	28311.7	9317.05	0		0.195275	0.442896	0.0147705	0.00654178	0.00785878	0.76996	0.468455	2.18534	1.427
964	0	28321.7	9317.05	0		0.257815	0.375564	0.0177411	0.00666293	0.00957987	0.643329	0.586168	2.05259	1.18432
965	0	28331.7	9317.05	0		0.19851	0.315342	0.0252984	0.00797767	0.0104631	0.705249	0.378274	2.44609	1.31816
966	0	28341.7	9317.05	0		0.219702	0.391556	0.0160648	0.00629028	0.00809566	0.718696	0.446168	1.93228	1.17101
967	0	28351.7	9317.05	0		0.216978	0.309879	0.0256008	0.00793315	0.0104981	0.69898	0.478376	2.78244	1.28947
968	0	28361.7	9317.05	0		0.221499	0.232859	0.0304823	0.00709808	0.11586	0.566514	0.533881	1.94395	1.24278
969	0	28371.7	9317.05	0		0.201045	0.394383	0.0220035	0.00867782	0.0141941	0.565498	0.511967	2.52303	1.29467
970	0	28381.7	9317.05	0		0.221865	0.309942	0.0258513	0.00801239	0.0121677	0.609091	0.431833	2.41693	1.31694
971	0	28391.7	9317.05	0		0.177184	0.37761	0.0202899	0.00766167	0.00958247	0.73956	0.420599	2.40018	1.26684
972	0	28401.7	9317.05	0		0.212431	0.400311	0.181488	0.0726518	0.00851256	0.790368	0.41902	2.47077	1.25082
973	0	28411.7	9317.05	0		0.130565	0.343709	0.201864	0.0693823	0.00897715	0.635232	0.406681	2.09	1.22622
974	0	28421.7	9317.05	0		0.165107	0.424737	0.0139069	0.0059068	0.00753463	0.725132	0.412441	1.86013	1.74678
975	0	28431.7	9317.05	0		0.164419	0.362591	0.0139913	0.00507313	0.00653332	0.71824	0.467047	2.29427	1.11262
976	0	28441.7	9317.05	0		0.191833	0.232054	0.0217579	0.00504902	0.113327	0.654739	0.492825	2.00391	1.43869
977	0	28451.7	9317.05	0		0.513068	0.136463	0.0630154	0.00859926	0.0103303	0.769972	0.423931	2.43652	1.27837
978	0	28461.7	9317.05	0		0.030795	0.199223	0.0645037	0.0128506	0.0120916	0.983028	0.45044	2.12095	1.43862
979	0	28471.7	9317.05	0		0.190531	0.195574	0.0338434	0.00661888	0.00659413	0.928441	0.42018	2.34444	1.23015
980	0	28481.7	9317.05	0		0.0353477	0.203291	0.0501518	0.0101954	0.010699	0.881434	0.412654	2.32531	1.28845
981	0	28491.7	9317.05	0		0.101526	0.372459	0.0160816	0.00598973	0.00605199	0.915454	0.434739	2.34395	1.29962
982	0	28501.7	9317.05	0		0.164295	0.365714	0.0185679	0.00679056	0.00588385	1.06751	0.381282	2.27509	1.2014
983	0	28511.7	9317.05	0		0.0283939	0.247109	0.0433059	0.0107013	0.00984433	1.00549	0.441649	2.36137	1.31959
984	0	28521.7	9317.05	0		0.0492483	0.237016	0.0581241	0.0137763	0.0125539	1.01504	0.442836	2.50605	1.30943
985	0	28531.7	9317.05	0		0.0183169	0.26443	0.0302405	0.00799649	0.00686314	1.07772	0.433072	2.50283	1.09164
986	0	28541.7	9317.05	0		0.0415426	0.189755	0.0779752	0.0147962	0.018022	0.759406	0.402015	2.27957	1.28563
987	0	28551.7	9317.05	0		0.169432	0.214537	0.0350917	0.00752847	0.00839979	0.829022	0.455366	2.46953	1.13805
988	0	28561.7	9317.05	0		0.164955	0.363412	0.0136918	0.00497577	0.00671526	0.68537	0.508665	2.32914	1.4868
989	0	28571.7	9317.05	0		0.169334	0.450273	0.0134921	0.00607512	0.00750478	0.748763	0.378301	2.01058	1.34692
990	0	28581.7	9317.05	0		0.139633	0.483033	0.0107916	0.00521271	0.00570962	0.84447	0.43581	2.12893	1.12334
991	0	28591.7	9317.05	0		0.170249	0.368804	0.0164285	0.0060589	0.00535867	1.04584	0.433285	2.26179	0.921196
992	0	28601.7	9317.05	0		0.025076	0.23559	0.041945	0.00988183	0.00940719	0.971639	0.365746	2.67399	1.26141
993	0	28611.7	9317.05	0		0.0196741	0.137159	0.0518013	0.007105	0.00653603	1.00549	0.439303	2.36981	1.4012
994	0	28621.7	9317.05	0		0.0147323	0.287094	0.021957	0.00630375	0.00551589	1.05709	0.394256	2.01835	1.20083
995	0	28631.7	9317.05	0		0.242083	0.297716	0.018477	0.00550089	0.0807577	1.00361	0.403333	2.16956	1.32077
996	0	28641.7	9317.05	0		0.0236984	0.334105	0.0249357	0.00833112	0.00786355	0.979969	0.487413	2.32948	1.2708
997	0	28651.7	9317.05	0		0.0243502	0.265967	0.0292798	0.00778745	0.115344	0.962523	0.480095	2.73437	1.0958
998	0	28661.7	9317.05	0		0.205956	0.306115	0.0231103	0.00707441	0.0698233	1.30507	0.419821	2.6376	1.33306
999	0	28671.7	9317.05	0		0.128439	0.376455	0.0166867	0.00628178	0.00433808	1.33941	0.450219	2.19612	1.21111
1000	0	28681.7	9317.05	0		0.00966475	0.432102	0.0149455	0.00645799	0.00474933	1.25775	0.471764	2.3432	1.22417
1001	0	28691.7	9317.05	0		0.0353598	0.260589	0.0467854	0.0121918	0.0103912	1.08525	0.519495	2.33648	1.2327
1002	0	28701.7	9317.05	0		0.336244	0.265234	0.0781426	0.020726	0.0194338	0.986476	0.42667	2.51502	1.3266
1003	0	28711.7	9317.05	0		0.0385433	0.215624	0.0834542	0.0179948	0.0128269	1.29764	0.443992	2.33281	1.2909
1004	0	28721.7	9317.05	0		0.148067	0.401646	0.0236161	0.00948532	0.00767516	1.14312	0.528589	2.05031	1.16947
1005	0	28731.7	9317.05	0		0.16663	0.469491	0.0126982	0.00596167	0.00638039	0.864267	0.463889	1.84542	1.12256
1006	0	28741.7	9317.05	0		0.210795	0.388294	0.0177482	0.00689151	0.00745836	0.854671	0.487619	2.07759	1.24234
1007	0	28751.7	9317.05	0		0.0303007	0.246561	0.049185	0.0121271	0.0122754	0.913791	0.489699	1.66504	1.3062
1008	0	28761.7	9317.05	0		0.162358	0.295038	0.0301175	0.00888582	0.00916538	0.896757	0.432163	2.25666	1.32166
1009	0	28771.7	9317.05	0		0.250834	0.469996	0.0147707	0.00694217	0.00741284	0.86624	0.434023	2.24647	1.29048
1010	0	28781.7	9317.05	0		0.167546	0.478445	0.0138877	0.00664451	0.00711933	0.863279	0.488712	2.10463	1.33475
1011	0	28791.7	9317.05	0		0.157845	0.542653	0.0151602	0.00822675	0.011241	0.676941	0.56318	1.67817	1.20882
1012	0	28801.7	9317.05	0		0.18355	0.320964	0.0292542	0.00938955	0.011719	0.741109	0.535948	1.92715	1.31636
1013	0	28811.7	9317.05	0		0.0284744	0.214897	0.0479573	0.0103059	0.0131926	0.722576	0.505274	1.959	1.24761
1014	0	28821.7	9317.05	0		0.167214	0.485366	0.0127254	0.00617649	0.00685325	0.833629	0.481301	2.2861	1.29519
1015	0	28831.7	9317.05	0		0.224513	0.446478	0.0157718	0.00704178	0.00833836	0.781141	0.619872	1.88662	1.4371
1016	0	28841.7	9317.05	0		0.173785	0.41868	0.0174934	0.00732414	0.00962611	0.703774	0.486864	2.16785	1.26965
1017	0	28851.7	9317.05	0		0.158109	0.532865	0.0143449	0.00764388	0.0107797	0.655895	0.593811	1.97879	1.26104
1018	0	28861.7	9317.05	0		0.179997	0.624141	0.0134477	0.00839327	0.0101979	0.761287	0.541229	2.39523	1.56864
1019	0	28871.7	9317.05	0		0.16664	0.722239	0.0126837	0.00916065	0.0104443	0.811284	0.470651	2.07117	1.44235
1020	0	28881.7	9317.05	0		0.176632	0.700901	0.0119214	0.00835575	0.00883961	0.87434	0.541918	2.02091	1.31081
1021	0	28891.7	9317.05	0		0.0123347	0.574612	0.0149713	0.00860272	0.0088678	0.89732	0.605754	1.86303	1.41655
1022	0	28901.7	9317.05	0		0.0514769	0.209326	0.0733584	0.0153558	0.0152554	0.93106	0.612776	1.72543	1.28493
1023	0	28911.7	9317.05	0		0.143394	0.514849	0.0147073	0.00757206	0.00799492	0.876048	0.611843	2.09967	1.43426
1024	0	28921.7	9317.05	0		0.188909	0.510734	0.0118665	0.00606064	0.00678414	0.826326	0.643983	1.73393	1.17923
1025	0	28931.7	9317.05	0		0.134798	0.524404	0.0123971	0.00650106	0.00617235	0.974229	0.577191	2.00134	1.25109
1026	0	28941.7	9317.05	0		0.176658	0.426034	0.0170045	0.0072445	0.00761776	0.879647	0.550301	2.14304	1.31587
1027	0	28951.7	9317.05	0		0.269854	0.336732	0.0380523	0.0128134	0.0169968	0.697308	0.552517	2.22147	1.21862
1028	0	28961.7	9317.05	0		0.275484	0.362525	0.0193448	0.00701298	0.104827	1.03854	0.557199	2.94038	1.05441
1029	0	28971.7	9317.05	0		0.0358552	0.311948	0.0494623	0.0154297	0.0186654	0.764624	0.567358	2.23794	1.23589
1030	0	28981.7	9317.05	0		0.281003	0.299174	0.0343007	0.0102619	0.00878491	1.08048	0.608218	2.22569	1.26909
1031	0	28991.7	9317.05	0		0.0402502	0.308921	0.0348133	0.0107546	0.0123095	0.808128	0.624238	2.31983	1.3111
1032	0	29001.7	9317.05	0		0.0400891	0.229627	0.0656719	0.0150801	0.0168894	0.82588	0.609136	2.17281	1.3009
1033	0	29011.7	9317.05	0		0.020737	0.273184	0.0311216	0.00850194	0.00996262	0.789354	0.5981	2.43406	1.17783
1034	0	29021.7	9317.05	0		0.14729	0.62263	0.0139275	0.00867167	0.00869037	0.92298	0.565254	3.02555	0.873133
1035	0	29031.7	9317.05	0		0.157253	0.510377	0.151217	0.0771778	0.0094878	0.747452	0.682343	2.13909	1.09277
1036	0	29041.7	9317.05	0		0.142936	0.623494	0.0963474	0.060072	0.00717011	0.724422	0.64925	2.09129	1.06672
1037	0	29051.7	9317.05	0		0.159251	0.935182	0.167298	0.156454	0.00821363	0.856151	1.01475	2.16343	0.892402
1038	0	29061.7	9317.05	0		0.0108514	0.797965	0.00946444	0.00755229	0.00881701	0.792291	0.619352	2.19673	1.13133
1039	0	29071.7	9317.05	0		0.0435854	0.73162	0.0224666	0.016437	0.0167758	0.90629	0.772463	2.36748	1.11437
1040	0	29081.7	9317.05	0		0.0612307	0.400936	0.0517208	0.0207367	0.0245399	0.78162	0.898108	1.7447	0.96063
1041	0	29091.7	9317.05	0		0.0397254	0.573407	0.0280892	0.0161065	0.0188656	0.789696	0.80552	2.16394	0.994123
1042	0	29101.7	9317.05	0		0.189903	0.636292	0.0215607	0.0137189	0.0201399	0.63007	0.765912	2.75718	0.849087
1043	0	29111.7	9317.05	0		0.02306	0.53048	0.163589	0.0867805	0.0111607	0.776978	0.956324	2.23565	0.891641
1044	0	29121.7	9317.05	0		0.20959	0.375999	0.0244972	0.00921093	0.014064	0.605791	0.886056	2.25061	0.921438
1045	0	29131.7	9317.05	0		0.0268207	0.530272	0.0241657	0.0128144	0.023916	0.495606	1.04032	2.29206	0.77942
1046	0	29141.7	9317.05	0		0.017247	0.558052	0.014583	0.00813808	0.0108139	0.696091	1.05188	2.72554	0.713294
1047	0	29151.7	9317.05	0		0.0193503	0.708669	0.0116816	0.00827841	0.0086745	0.882735	0.810833	2.57876	0.778981
1048	0	29161.7	9317.05	0		0.292342	0.526647	0.0187748	0.0098877	0.0120892	0.75653	1.06982	2.3307	0.740258
1049	0	29171.7	9317.05	0		0.0217233	0.568453	0.0149396	0.00849245	0.00975655	0.805127	1.04963	2.56613	0.556569
1050	0	29181.7	9317.05	0		0.0233512	0.539291	0.0179518	0.00968122	0.0107075	0.836315	1.03786	3.08194	0.593758
1051	0	29191.7	9317.05	0		0.0207444	0.589796	0.0189772	0.0111927	0.0153673	0.673698	0.984197	2.72102	0.75701
1052	0	29201.7	9317.05	0		0.0204078	0.53438	0.0176074	0.00940906	0.0159682	0.545028	1.14355	2.62403	0.635371
1053	0	29211.7	9317.05	0		0.0186838	0.78329	0.254799	0.199582	0.224075	0.791608	1.08656	2.35437	0.699429
1054	0	29221.7	9317.05	0		0.277483	0.70091	0.129387	0.090689	0.00532139	0.803337	1.12422	2.18546	0.555181
1055	0	29231.7	9317.05	0		0.0222869	0.565898	0.0200581	0.0113509	0.0161036	0.651978	0.891779	2.77554	0.693723
1056	0	27921.7	9307.05	0		0.0129484	1.40011	0.185134	0.259208	0.0104968	0.990187	1.16567	2.78561	1.23232
1057	0	27931.7	9307.05	0		0.211799	1.05241	0.00821213	0.00864254	0.0127033	0.629294	0.842148	2.58281	0.654327
1058	0	27941.7	9307.05	0		0.242514	0.861676	0.00764768	0.00658982	0.00974282	0.625628	0.766711	2.22738	0.852327
1059	0	27951.7	9307.05	0		0.138264	1.11026	0.0802618	0.0891113	0.0090711	0.761764	0.946658	2.53651	0.728799
1060	0	27961.7	9307.05	0		0.197732	1.13311	0.174403	0.197618	0.00981838	0.733352	0.82578	3.15942	0.805156
1061	0	27971.7	9307.05	0		0.165012	0.924786	0.128315	0.118664	0.00752525	0.826414	0.733227	2.77564	0.849707
1062	0	27981.7	9307.05	0		0.182274	0.685573	0.0110533	0.00757785	0.010329	0.678605	0.882284	2.44731	0.730545
1063	0	27991.7	9307.05	0		0.565867	0.637237	0.0280862	0.0178975	0.0305637	0.541646	1.05624	2.48547	0.905532
1064	0	28001.7	9307.05	0		0.0491359	0.647782	0.0228234	0.0147846	0.0193324	0.70738	1.02072	2.3094	0.935397
1065	0	28011.7	9307.05	0		0.020237	0.942488	0.01095	0.0103202	0.00881856	1.08248	1.08611	2.10878	0.863811
1066	0	28021.7	9307.05	0		0.0810844	0.554608	0.0372768	0.020674	0.0224505	0.851778	1.02813	2.07016	0.838563
1067	0	28031.7	9307.05	0		0.0612584	0.356897	0.0566768	0.0202278	0.021891	0.854694	1.18026	1.96013	0.876703
1068	0	28041.7	9307.05	0		0.0314995	0.470534	0.0322437	0.0151717	0.0108748	1.29045	0.995298	2.19676	0.64357
1069	0	28051.7	9307.05	0		0.0409469	0.411332	0.495883	0.203973	0.0136536	1.07436	1.37966	1.81099	0.732163
1070	0	28061.7	9307.05	0		0.0431232	0.370913	0.0453763	0.0168307	0.0188582	0.825522	1.00806	2.13469	0.757266
1071	0	28071.7	9307.05	0		0.0344576	0.687453	0.0238856	0.0164203	0.0172527	0.880341	1.10195	2.15255	0.781436
1072	0	28081.7	9307.05	0		0.188254	0.538524	0.0177872	0.00957887	0.00854603	1.03676	0.779371	2.53895	0.80149
1073	0	28091.7	9307.05	0		0.0460726	0.445163	0.0505534	0.0225045	0.0281332	0.739909	0.989538	1.99987	1.06992
1074	0	28101.7	9307.05	0		0.190151	0.583539	0.0177043	0.0103312	0.00727465	1.3136	0.847234	1.59345	1.09399
1075	0	28111.7	9307.05	0		0.150668	0.715142	0.125218	0.0895489	0.00633915	1.11854	0.559431	1.96786	0.927941
1076	0	28121.7	9307.05	0		0.165662	0.838204	0.129964	0.108936	0.00608913	1.15868	0.548691	1.68696	1.02665
1077	0	28131.7	9307.05	0		0.127694	0.94971	0.0983227	0.0933781	0.0049605	1.50808	0.608696	1.70462	1.05042
1078	0	28141.7	9307.05	0		0.182518	0.84433	0.0955817	0.0807026	0.00506069	1.27027	0.608909	2.04961	1.04141
1079	0	28151.7	9307.05	0		0.204187	0.793454	0.10269	0.0814799	0.00663406	0.981434	0.697157	1.67659	1.25276
1080	0	28161.7	9307.05	0		0.213407	0.558682	0.0119334	0.00666699	0.00841879	0.7325	0.500677	2.57943	1.27599
1081	0	28171.7	9307.05	0		0.153375	0.443565	0.0130786	0.0058012	0.0077132	0.695682	0.302338	2.33218	1.39999
1082	0	28181.7	9307.05	0		0.148294	0.313533	0.0198769	0.00623206	0.00840723	0.685656	0.4397	1.82774	1.36135
1083	0	28191.7	9307.05	0		0.0173721	0.249502	0.0439524	0.0109662	0.0106882	0.949032	0.495165	2.18652	1.14833
1084	0	28201.7	9307.05	0		0.21016	0.287814	0.0399809	0.0115071	0.0120711	0.881751	0.490116	2.04904	1.13577
1085	0	28211.7	9307.05	0		0.0323771	0.24261	0.0630836	0.0153047	0.0161825	0.874796	0.448718	1.79683	1.35654
1086	0	28221.7	9307.05	0		0.0208402	0.305588	0.0297212	0.00908243	0.00934063	0.899401	0.516952	1.77996	1.39342
1087	0	28231.7	9307.05	0		0.012873	0.564209	0.0154023	0.00869014	0.00778383	1.03267	0.50179	2.11005	1.47267
1088	0	28241.7	9307.05	0		0.226876	0.297335	0.0317927	0.00945309	0.117661	1.12699	0.553207	2.27835	1.4866
1089	0	28251.7	9307.05	0		0.0563124	0.0170074	0.718835	0.0122255	0.013255	0.853128	0.52256	1.96981	1.41849
1090	0	28261.7	9307.05	0		0.234897	0.281104	0.0465497	0.0130853	0.014057	0.861034	0.447959	1.9813	1.59041
1091	0	28271.7	9307.05	0		0.106393	0.286827	0.02597	0.00744889	0.0714633	0.925969	0.388855	2.09073	1.20727
1092	0	28281.7	9307.05	0		0.158725	0.318769	0.021153	0.00674291	0.00729008	0.855545	0.341797	2.16735	1.25594
1093	0	28291.7	9307.05	0		0.151681	0.317013	0.0207322	0.00657237	0.00738476	0.823215	0.427438	1.94706	1.25
1094	0	28301.7	9307.05	0		0.224362	0.185281	0.0489792	0.00907492	0.00889091	0.944114	0.486089	2.10682	1.29781
1095	0	28311.7	9307.05	0		0.141045	0.248575	0.0342571	0.00851548	0.00859813	0.916079	0.428176	2.09091	1.28138
1096	0	28321.7	9307.05	0		0.166352	0.225052	0.0377183	0.00848857	0.0105422	0.744783	0.4337	1.91927	1.21959
1097	0	28331.7	9307.05	0		0.124386	0.222898	0.0254509	0.00567294	0.00618067	0.848985	0.416504	2.15366	1.28398
1098	0	28341.7	9307.05	0		0.178907	0.350661	0.0136223	0.00477681	0.00631735	0.699409	0.541618	2.15482	1.05686
1099	0	28351.7	9307.05	0		0.133214	0.299869	0.0254375	0.00762791	0.00990348	0.712435	0.502802	1.93347	1.28602
1100	0	28361.7	9307.05	0		0.0250067	0.159439	0.0654448	0.0104344	0.0144438	0.668215	0.477116	1.9729	1.38139
1101	0	28371.7	9307.05	0		0.261616	0.102369	0.0997876	0.0102152	0.0138117	0.684112	0.505389	1.72016	1.38149
1102	0	28381.7	9307.05	0		0.129549	0.296889	0.0314407	0.00933438	0.0121504	0.710595	0.499435	1.69493	1.23688
1103	0	28391.7	9307.05	0		0.218582	0.393743	0.0170673	0.00672014	0.00821885	0.756301	0.466314	1.69563	1.10125
1104	0	28401.7	9307.05	0		0.148413	0.348248	0.018748	0.00652897	0.00776207	0.778027	0.471358	2.22222	1.36062
1105	0	28411.7	9307.05	0		0.197471	0.314168	0.0261723	0.00822251	0.0087289	0.87131	0.470665	1.89716	1.31035
1106	0	28421.7	9307.05	0		0.0805684	0.289239	0.0242341	0.00700945	0.00712333	0.910182	0.445496	1.77877	1.09073
1107	0	28431.7	9307.05	0		0.0100788	0.407485	0.0158824	0.00647184	0.00689813	0.867809	0.461824	2.12322	1.13713
1108	0	28441.7	9307.05	0		0.019645	0.281839	0.0362526	0.0102174	0.0104546	0.903986	0.484114	2.36564	1.35983
1109	0	28451.7	9307.05	0		0.293876	0.166701	0.0807286	0.0134576	0.0134889	0.922818	0.448159	1.82072	1.36853
1110	0	28461.7	9307.05	0		0.168241	0.187283	0.0301365	0.00564404	0.00637251	0.819231	0.547161	2.28743	1.20632
1111	0	28471.7	9307.05	0		0.237759	0.293567	0.0224588	0.00659316	0.00683757	0.891906	0.393603	1.99023	1.2463
1112	0	28481.7	9307.05	0		0.0164926	0.293028	0.0266262	0.00780222	0.00695121	1.03821	0.503026	2.65335	1.28742
1113	0	28491.7	9307.05	0		0.167914	0.352195	0.0160614	0.00565674	0.00555188	0.942439	0.494532	2.05741	1.00154
1114	0	28501.7	9307.05	0		0.178383	0.458454	0.00959148	0.00439725	0.00397867	1.02228	0.524021	1.93577	1.00271
1115	0	28511.7	9307.05	0		0.131743	0.430432	0.0131987	0.00568115	0.00410058	1.2815	0.517545	1.61806	1.15578
1116	0	28521.7	9307.05	0		0.168755	0.436087	0.0134309	0.00585705	0.00448578	1.20773	0.466821	2.53365	1.06373
1117	0	28531.7	9307.05	0		0.216685	0.466753	0.0123591	0.00576863	0.00587113	0.908822	0.410329	2.25758	1.10532
1118	0	28541.7	9307.05	0		0.196187	0.404057	0.149342	0.0603427	0.00511711	0.784123	0.40316	2.53235	1.31543
1119	0	28551.7	9307.05	0		0.180402	0.228988	0.0317988	0.00728154	0.0102813	0.655091	0.485385	1.91345	1.17268
1120	0	28561.7	9307.05	0		0.189826	0.344281	0.156431	0.0538562	0.00723357	0.690193	0.424637	2.2189	1.18154
1121	0	28571.7	9307.05	0		0.173398	0.414237	0.0108885	0.00451044	0.00649998	0.641851	0.388308	2.20279	1.09132
1122	0	28581.7	9307.05	0		0.181445	0.522178	0.00928397	0.00484788	0.00536276	0.836164	0.464866	1.98114	1.08675
1123	0	28591.7	9307.05	0		0.151899	0.321179	0.0201444	0.00646997	0.00634755	0.942808	0.44587	2.09583	1.12848
1124	0	28601.7	9307.05	0		0.0365054	0.321291	0.0385636	0.0123901	0.0145419	0.788101	0.436401	2.11151	1.36637
1125	0	28611.7	9307.05	0		0.0304424	0.293445	0.0435041	0.012766	0.0814283	1.24862	0.379807	2.67996	1.32703
1126	0	28621.7	9307.05	0		0.0249186	0.270795	0.0390732	0.0105808	0.00921801	1.06172	0.433158	2.4901	1.25014
1127	0	28631.7	9307.05	0		0.17117	0.280291	0.0228885	0.00641544	0.0521587	0.923907	0.410308	2.15636	1.23174
1128	0	28641.7	9307.05	0		0.16948	0.446813	0.0142054	0.00634717	0.00551499	1.06454	0.423212	2.30991	1.202
1129	0	28651.7	9307.05	0		0.0207119	0.375029	0.0286293	0.0107368	0.00900423	1.10295	0.405307	2.68606	1.24639
1130	0	28661.7	9307.05	0		0.025605	0.253931	0.0454283	0.0115357	0.0102562	1.04036	0.414926	2.64417	1.26046
1131	0	28671.7	9307.05	0		0.0216042	0.322052	0.0313486	0.0100958	0.0791588	1.18733	0.402727	2.08659	1.20899
1132	0	28681.7	9307.05	0		0.0164209	0.300533	0.0253815	0.00762797	0.00580711	1.215	0.37266	2.35446	1.234
1133	0	28691.7	9307.05	0		0.312522	0.23686	0.0438756	0.0103924	0.00792273	1.2133	0.510724	2.17479	1.30153
1134	0	28701.7	9307.05	0		0.0340546	0.179958	0.083233	0.0149785	0.0140578	0.985546	0.42478	2.29369	1.5133
1135	0	28711.7	9307.05	0		0.0343502	0.190234	0.0471285	0.00896547	0.00818923	1.01265	0.400041	2.62609	1.41077
1136	0	28721.7	9307.05	0		0.0106194	0.451115	0.0158677	0.00715815	0.0960587	1.19903	0.463242	1.97267	1.33987
1137	0	28731.7	9307.05	0		0.179602	0.488865	0.0139015	0.00679597	0.00624787	1.00611	0.484594	2.00317	1.30543
1138	0	28741.7	9307.05	0		0.128916	0.359042	0.0207819	0.00746159	0.00810899	0.851123	0.477142	2.24491	1.312
1139	0	28751.7	9307.05	0		0.0622282	0.035456	0.718835	0.025487	0.0250312	0.941815	0.545175	1.75944	1.37561
1140	0	28761.7	9307.05	0		0.208128	0.246255	0.0516885	0.0127285	0.0118856	0.990572	0.463835	1.99483	1.34715
1141	0	28771.7	9307.05	0		0.113886	0.409464	0.015601	0.00638803	0.00713893	0.827679	0.429951	2.10937	1.27323
1142	0	28781.7	9307.05	0		0.261281	0.492923	0.017017	0.00838808	0.010593	0.732439	0.502935	1.84237	1.11835
1143	0	28791.7	9307.05	0		0.192093	0.627527	0.0109618	0.00687883	0.00872335	0.729389	0.454268	2.45116	1.1903
1144	0	28801.7	9307.05	0		0.106312	0.354796	0.0198978	0.00705967	0.00878401	0.743394	0.453967	2.39779	1.10969
1145	0	28811.7	9307.05	0		0.0202755	0.216661	0.042354	0.00917645	0.0122912	0.690569	0.432747	1.71782	1.24279
1146	0	28821.7	9307.05	0		0.0229973	0.227562	0.0479991	0.0109228	0.016843	0.59985	0.513882	1.62567	1.29334
1147	0	28831.7	9307.05	0		0.0269999	0.244145	0.0527438	0.0128771	0.0159405	0.747212	0.513312	1.88148	1.29754
1148	0	28841.7	9307.05	0		0.133444	0.522098	0.0150584	0.00786195	0.010894	0.667529	0.543458	1.75	1.37562
1149	0	28851.7	9307.05	0		0.205868	0.77963	0.0117106	0.00912993	0.01071	0.788507	0.707523	1.81952	1.43921
1150	0	28861.7	9307.05	0		0.224778	0.546365	0.0161731	0.00883639	0.00958784	0.852475	0.576785	2.04929	1.33053
1151	0	28871.7	9307.05	0		0.179325	0.617561	0.0132824	0.00820272	0.00964978	0.786263	0.434354	2.2294	1.18973
1152	0	28881.7	9307.05	0		0.16988	0.61117	0.111502	0.0681467	0.00797669	0.714268	0.536364	2.11799	1.13291
1153	0	28891.7	9307.05	0		0.164494	0.651832	0.0100559	0.00655476	0.00908688	0.667221	0.461699	2.32195	1.28719
1154	0	28901.7	9307.05	0		0.12539	0.514988	0.0114542	0.00589875	0.00683585	0.79817	0.594224	2.04908	1.27102
1155	0	28911.7	9307.05	0		0.304427	0.570251	0.013482	0.00768814	0.00707499	1.00513	0.345094	2.04332	1.03879
1156	0	28921.7	9307.05	0		0.0380048	0.341165	0.0480747	0.0164014	0.0195814	0.774755	0.535817	2.00699	1.26112
1157	0	28931.7	9307.05	0		0.0214012	0.307761	0.0296922	0.00913812	0.0112831	0.74913	0.580058	2.13664	1.45504
1158	0	28941.7	9307.05	0		0.228441	0.460964	0.0127484	0.00587655	0.00562899	0.965651	0.591774	2.11588	1.32594
1159	0	28951.7	9307.05	0		0.0278096	0.270073	0.0338821	0.00915064	0.0131286	0.644702	0.515972	2.22912	1.28119
1160	0	28961.7	9307.05	0		0.0257556	0.38446	0.0301412	0.0115881	0.0115138	0.930938	0.481494	2.6008	1.38779
1161	0	28971.7	9307.05	0		0.0492339	0.28152	0.0677074	0.019061	0.020774	0.848698	0.560936	2.79819	1.20751
1162	0	28981.7	9307.05	0		0.0465578	0.249187	0.0670935	0.0167189	0.0200974	0.769475	0.588361	2.50232	1.26042
1163	0	28991.7	9307.05	0		0.284664	0.330832	0.0442863	0.0146513	0.019481	0.695653	0.601357	2.42313	1.27711
1164	0	29001.7	9307.05	0		0.020497	0.3705	0.0229471	0.00850192	0.0100099	0.785622	0.573711	2.06601	1.17408
1165	0	29011.7	9307.05	0		0.0153453	0.386662	0.0205104	0.0079306	0.00788621	0.930177	0.632089	2.12656	1.03437
1166	0	29021.7	9307.05	0		0.251282	0.408757	0.0174362	0.00712715	0.00782132	0.842875	0.583326	2.27279	1.10436
1167	0	29031.7	9307.05	0		0.0440921	0.266593	0.051942	0.0138473	0.0159534	0.802864	0.618318	1.99335	1.24008
1168	0	29041.7	9307.05	0		0.0269051	0.416771	0.0273126	0.0113831	0.0120375	0.874689	0.631563	2.09274	1.15805
1169	0	29051.7	9307.05	0		0.167569	0.663149	0.00971524	0.00644265	0.00700184	0.851099	0.796531	3.26372	1.11347
1170	0	29061.7	9307.05	0		0.110214	0.937805	0.117167	0.10988	0.00650264	0.880713	0.532155	2.41232	0.98385
1171	0	29071.7	9307.05	0		0.018941	0.595511	0.0170621	0.0101607	0.0101107	0.92954	0.758015	2.05717	1.47845
1172	0	29081.7	9307.05	0		0.0366881	0.257569	0.0573007	0.0147589	0.0286859	0.475896	0.80985	2.31524	1.0276
1173	0	29091.7	9307.05	0		0.0387893	0.544143	0.0331455	0.0180359	0.0271355	0.614791	0.778578	2.55106	0.992861
1174	0	29101.7	9307.05	0		0.0155302	0.567934	0.0109643	0.00622697	0.0063534	0.906564	0.748948	3.29565	0.916439
1175	0	29111.7	9307.05	0		0.0168105	0.594817	0.00833717	0.00495909	0.00563608	0.813865	0.54691	2.13016	0.842217
1176	0	29121.7	9307.05	0		0.0213332	0.594567	0.0188378	0.0112003	0.0134361	0.771051	0.865637	2.10144	1.02939
1177	0	29131.7	9307.05	0		0.190622	0.640799	0.0125095	0.00801604	0.0101972	0.727117	0.857193	2.80048	0.925709
1178	0	29141.7	9307.05	0		0.0116447	0.619949	0.0100978	0.00626013	0.00677307	0.85492	0.830972	2.38864	0.55747
1179	0	29151.7	9307.05	0		0.00976296	0.736452	0.0888756	0.0654526	0.00421789	0.973594	0.610838	2.1067	0.747029
1180	0	29161.7	9307.05	0		0.026658	0.80313	0.0151774	0.0121894	0.011867	0.950101	0.979533	2.12077	0.740034
1181	0	29171.7	9307.05	0		0.0223352	0.680226	0.212317	0.144424	0.00945694	0.889498	0.900272	2.58149	0.765118
1182	0	29181.7	9307.05	0		0.284963	0.932375	0.0142274	0.0132653	0.019885	0.617047	1.00278	2.57936	0.788531
1183	0	29191.7	9307.05	0		0.0371946	0.566486	0.0312814	0.0177205	0.0365852	0.44802	1.04913	2.85856	0.746493
1184	0	29201.7	9307.05	0		0.0279779	0.455272	0.0292308	0.0133079	0.0188035	0.654636	1.05402	2.48939	0.691079
1185	0	29211.7	9307.05	0		0.0184204	0.582559	0.015028	0.00875468	0.011644	0.695449	0.854784	2.63604	0.860809
1186	0	29221.7	9307.05	0		0.237965	0.913161	0.201872	0.184342	0.00969771	0.778771	0.743364	21.8739	0.0529243
1187	0	29231.7	9307.05	0		0.0187959	0.53916	0.0141754	0.00764278	0.00986373	0.7167	1.1215	2.16047	1.09715
1188	0	29241.7	9307.05	0		0.0269105	0.333975	0.028088	0.00938069	0.0153996	0.563446	1.07535	2.58689	0.935349
1189	0	29251.7	9307.05	0		0.0593199	0.445141	0.0550367	0.0244991	0.0746735	0.303467	1.41694	2.1572	0.93997
1190	0	27911.7	9297.05	0		0.2226	1.32377	0.0087505	0.0115837	0.0156245	0.685752	0.787348	2.57893	0.10627
1191	0	27921.7	9297.05	0		0.113682	0.885184	0.127279	0.112666	0.00670718	0.776665	0.756841	2.06358	0.989752
1192	0	27931.7	9297.05	0		0.215924	0.794176	0.158295	0.125714	0.0104535	0.648308	1.06413	2.23418	0.577886
1193	0	27941.7	9297.05	0		0.152277	0.917477	0.095251	0.0873907	0.0106251	0.678771	0.821234	2.81631	0.819972
1194	0	27951.7	9297.05	0		0.151703	0.822344	0.0116504	0.00958067	0.0140256	0.631832	0.939185	1.95918	0.66415
1195	0	27961.7	9297.05	0		0.174632	0.639672	0.00893732	0.00571696	0.00952042	0.555439	0.700298	3.3669	0.925059
1196	0	27971.7	9297.05	0		0.0205069	0.474704	0.287548	0.1365	0.0108927	0.782173	0.831175	2.90185	0.696521
1197	0	27981.7	9297.05	0		0.0242349	0.51094	0.023414	0.0119632	0.0154951	0.714134	0.972412	1.98735	0.84506
1198	0	27991.7	9297.05	0		0.0426421	0.492868	0.0443741	0.0218706	0.0327122	0.618411	1.0317	2.56991	0.840787
1199	0	28001.7	9297.05	0		0.0242877	0.828447	0.0153349	0.0127042	0.016616	0.707207	0.929778	2.77716	0.878351
1200	0	28011.7	9297.05	0		0.0163088	0.98713	0.0132645	0.0130938	0.00872316	1.38842	0.536391	2.43336	0.836908
1201	0	28021.7	9297.05	0		0.0699423	0.496221	0.0320039	0.015881	0.0159337	0.921908	0.877958	2.21112	0.841276
1202	0	28031.7	9297.05	0		0.052962	0.446325	0.0643132	0.0287046	0.0241149	1.10101	1.06593	2.47916	0.983658
1203	0	28041.7	9297.05	0		0.0259201	0.459254	0.0325297	0.0149394	0.0138254	0.999503	0.994427	2.27089	0.77154
1204	0	28051.7	9297.05	0		0.0110449	0.76239	0.0100564	0.00766688	0.00712389	0.995471	0.74092	2.04255	0.0717264
1205	0	28061.7	9297.05	0		0.0129014	0.530359	0.0141482	0.00750364	0.00693291	1.00112	0.975383	2.13029	0.77546
1206	0	28071.7	9297.05	0		0.166338	0.531997	0.0123499	0.0065701	0.00634437	0.957879	0.92146	1.87248	0.957683
1207	0	28081.7	9297.05	0		0.219156	0.711582	0.0095275	0.0067796	0.00566431	1.10709	0.747246	1.80345	0.921024
1208	0	28091.7	9297.05	0		0.0153328	0.356948	0.0223642	0.00798285	0.00781541	0.944787	0.559987	1.94871	1.02641
1209	0	28101.7	9297.05	0		0.170662	0.731422	0.18566	0.135796	0.00637069	1.2782	0.732088	2.66376	1.0181
1210	0	28111.7	9297.05	0		0.173212	0.842195	0.103572	0.0872277	0.00669685	1.00616	0.602836	2.46902	1.2883
1211	0	28121.7	9297.05	0		0.0975061	0.839862	0.120822	0.101474	0.00670467	1.35732	0.626344	2.46737	0.874231
1212	0	28131.7	9297.05	0		0.113945	0.533391	0.0111661	0.00595591	0.00586905	0.938659	0.496163	2.60978	1.07066
1213	0	28141.7	9297.05	0		0.234563	0.365021	0.0240211	0.00876819	0.00837734	0.968125	0.583547	1.87656	1.1679
1214	0	28151.7	9297.05	0		0.184159	0.510504	0.01385	0.00707051	0.00713523	0.916579	0.49719	2.08539	1.11328
1215	0	28161.7	9297.05	0		0.249428	0.300324	0.0248051	0.00744956	0.00799947	0.861384	0.454907	1.88454	1.14406
1216	0	28171.7	9297.05	0		0.0229477	0.26371	0.0359305	0.00947526	0.0123838	0.707725	0.434776	2.08936	1.37274
1217	0	28181.7	9297.05	0		0.274182	0.322015	0.0310599	0.0100018	0.0109346	0.846063	0.450576	2.11487	1.3038
1218	0	28191.7	9297.05	0		0.0284566	0.218887	0.0655084	0.0143389	0.019566	0.677863	0.481784	2.27746	1.31528
1219	0	28201.7	9297.05	0		0.0245341	0.231188	0.0538583	0.0124514	0.0170137	0.676935	0.38234	2.60882	1.34451
1220	0	28211.7	9297.05	0		0.0263089	0.320889	0.0393545	0.0126284	0.0146908	0.795114	0.496439	2.13703	1.41306
1221	0	28221.7	9297.05	0		0.0215628	0.308139	0.0301919	0.00930329	0.00688087	1.25061	0.393065	2.2673	1.26064
1222	0	28231.7	9297.05	0		0.0207595	0.285525	0.0308775	0.00881631	0.00844562	0.965569	0.388254	2.32563	1.43167
1223	0	28241.7	9297.05	0		0.0122585	0.406674	0.020628	0.00838888	0.00903537	0.858787	0.419644	2.18114	1.27306
1224	0	28251.7	9297.05	0		0.0555149	0.0214533	0.718835	0.0154214	0.0207874	0.686201	0.40833	2.10993	1.3099
1225	0	28261.7	9297.05	0		0.0634665	0.20022	0.109787	0.0219816	0.0226507	0.897645	0.363678	2.30692	1.42808
1226	0	28271.7	9297.05	0		0.225018	0.275478	0.0352591	0.00971308	0.00889445	1.0101	0.364002	2.32736	1.46405
1227	0	28281.7	9297.05	0		0.156317	0.464892	0.0163866	0.00761798	0.0069091	1.01987	0.459927	2.0633	1.31423
1228	0	28291.7	9297.05	0		0.0183592	0.262143	0.0373734	0.00979719	0.0106218	0.853158	0.420395	1.95605	1.18397
1229	0	28301.7	9297.05	0		0.0398371	0.102046	0.103843	0.0105967	0.0116401	0.842055	0.457245	1.8281	1.29208
1230	0	28311.7	9297.05	0		0.0278826	0.149947	0.0628841	0.00942925	0.0101888	0.856019	0.43722	2.1432	1.50739
1231	0	28321.7	9297.05	0		0.0259229	0.234009	0.0475233	0.0111209	0.0118002	0.87172	0.37043	2.70865	1.37097
1232	0	28331.7	9297.05	0		0.0267444	0.177638	0.0651806	0.0115785	0.0115374	0.928265	0.378035	2.5865	1.3001
1233	0	28341.7	9297.05	0		0.0152582	0.194777	0.0425871	0.00829498	0.0090645	0.846446	0.467298	2.146	1.02645
1234	0	28351.7	9297.05	0		0.0111996	0.280827	0.0263856	0.0074098	0.0100634	0.681064	0.502223	2.06207	1.26022
1235	0	28361.7	9297.05	0		0.188259	0.340997	0.0244424	0.0083348	0.0107208	0.71911	0.425089	1.78117	1.38058
1236	0	28371.7	9297.05	0		0.0266642	0.189091	0.0651656	0.0123222	0.0158206	0.720435	0.467274	1.62669	1.06468
1237	0	28381.7	9297.05	0		0.203859	0.304418	0.0217124	0.00660966	0.00790549	0.773353	0.42244	1.89652	1.24948
1238	0	28391.7	9297.05	0		0.18663	0.336201	0.0220272	0.00740557	0.00904723	0.75713	0.576591	1.94962	1.22141
1239	0	28401.7	9297.05	0		0.197385	0.346633	0.0216505	0.00750477	0.0087477	0.793545	0.46039	2.28236	1.19694
1240	0	28411.7	9297.05	0		0.202504	0.391428	0.0197907	0.00774664	0.00805911	0.889107	0.486038	2.33207	1.29587
1241	0	28421.7	9297.05	0		0.150971	0.366663	0.0180996	0.00663645	0.00669618	0.91672	0.597417	1.69222	1.37277
1242	0	28431.7	9297.05	0		0.118608	0.379064	0.0150688	0.00571202	0.00594613	0.888552	0.440846	2.29036	1.28795
1243	0	28441.7	9297.05	0		0.0233487	0.159556	0.0639802	0.0102084	0.010837	0.871317	0.426257	2.04809	1.14213
1244	0	28451.7	9297.05	0		0.230804	0.169289	0.0788337	0.0133457	0.0160274	0.770202	0.460403	1.93131	1.32998
1245	0	28461.7	9297.05	0		0.182156	0.278208	0.0204492	0.00568912	0.00668789	0.786835	0.481955	1.99835	1.17842
1246	0	28471.7	9297.05	0		0.257911	0.347777	0.0157861	0.00549005	0.00543421	0.934474	0.525033	2.02075	1.01783
1247	0	28481.7	9297.05	0		0.182867	0.368938	0.0153624	0.00566778	0.00587271	0.892693	0.487818	1.83112	1.15535
1248	0	28491.7	9297.05	0		0.105488	0.545662	0.0112122	0.0061181	0.00628626	0.900226	0.534683	1.9013	1.05746
1249	0	28501.7	9297.05	0		0.156632	0.446522	0.080776	0.0360683	0.0607571	0.888021	0.493139	2.27615	1.14972
1250	0	28511.7	9297.05	0		0.0198314	0.29291	0.0300912	0.00881402	0.00788879	1.03345	0.450958	1.84922	1.14297
1251	0	28521.7	9297.05	0		0.161961	0.226106	0.0297976	0.00673743	0.049571	1.03678	0.437169	2.2114	1.30586
1252	0	28531.7	9297.05	0		0.161389	0.329157	0.0191586	0.00630621	0.00555415	1.05021	0.500963	1.71242	1.33992
1253	0	28541.7	9297.05	0		0.151058	0.435781	0.0108043	0.00470831	0.00615754	0.70727	0.454362	2.02792	1.09757
1254	0	28551.7	9297.05	0		0.20366	0.427042	0.0104936	0.0044812	0.0059194	0.700235	0.427363	1.99087	1.04516
1255	0	28561.7	9297.05	0		0.123351	0.435433	0.0122332	0.00532673	0.00623909	0.78971	0.429513	1.98724	1.21391
1256	0	28571.7	9297.05	0		0.205853	0.340495	0.0199071	0.00677829	0.00783374	0.800347	0.439589	1.77315	1.02509
1257	0	28581.7	9297.05	0		0.0229139	0.16416	0.0523477	0.00859339	0.00835204	0.951699	0.417926	2.11767	1.13189
1258	0	28591.7	9297.05	0		0.0194303	0.249924	0.0308902	0.00772021	0.00830939	0.859384	0.44476	2.33814	1.36107
1259	0	28601.7	9297.05	0		0.0277021	0.330816	0.0424199	0.0140332	0.117311	0.857811	0.41434	2.55677	1.35035
1260	0	28611.7	9297.05	0		0.206267	0.269647	0.0232622	0.00627258	0.00657402	0.882556	0.390904	2.45266	1.36643
1261	0	28621.7	9297.05	0		0.0135463	0.252333	0.0296468	0.00748088	0.00750728	0.921717	0.404205	2.23038	1.22727
1262	0	28631.7	9297.05	0		0.0276294	0.175601	0.0600974	0.0105531	0.0108139	0.902669	0.429556	2.0766	1.3732
1263	0	28641.7	9297.05	0		0.0177947	0.26882	0.0330983	0.00889747	0.00904837	0.909544	0.408103	2.45926	1.28614
1264	0	28651.7	9297.05	0		0.0238261	0.16917	0.0435791	0.00737226	0.00679276	1.00388	0.420409	2.75036	1.37074
1265	0	28661.7	9297.05	0		0.0274392	0.262905	0.0417968	0.0109886	0.0111411	0.912306	0.394378	2.96145	1.30105
1266	0	28671.7	9297.05	0		0.0245948	0.277911	0.043717	0.0121494	0.0113264	0.992185	0.407473	2.54271	1.30642
1267	0	28681.7	9297.05	0		0.0241306	0.368999	0.0358319	0.0132219	0.0123396	0.991107	0.41683	2.54205	1.35915
1268	0	28691.7	9297.05	0		0.0423126	0.206385	0.0576757	0.0119034	0.00886276	1.24231	0.505862	2.29682	1.0759
1269	0	28701.7	9297.05	0		0.19296	0.292658	0.0460716	0.0134832	0.0122428	1.01869	0.426128	2.03264	1.33216
1270	0	28711.7	9297.05	0		0.173729	0.336198	0.0303732	0.0102114	0.00995033	0.949238	0.458371	2.34178	1.50638
1271	0	28721.7	9297.05	0		0.125137	0.407629	0.168772	0.0687963	0.00538087	1.0852	0.502351	2.04459	1.2959
1272	0	28731.7	9297.05	0		0.206595	0.466767	0.0175639	0.00819826	0.00854499	0.887438	0.444053	1.98771	1.07345
1273	0	28741.7	9297.05	0		0.157994	0.383921	0.0186737	0.00716924	0.00858705	0.772248	0.541756	1.88288	1.27602
1274	0	28751.7	9297.05	0		0.0505491	0.160963	0.103709	0.0166932	0.0174001	0.887393	0.567765	1.64804	1.45428
1275	0	28761.7	9297.05	0		0.164217	0.47346	0.0155362	0.00735575	0.00717091	0.948812	0.453593	1.80076	1.42925
1276	0	28771.7	9297.05	0		0.0146201	0.481827	0.0215286	0.0103731	0.0102846	0.932926	0.534724	2.05675	0.90395
1277	0	28781.7	9297.05	0		0.191104	0.608288	0.0119562	0.00727283	0.00801198	0.839636	0.544756	1.9619	1.6217
1278	0	28791.7	9297.05	0		0.141062	0.617035	0.0107708	0.00664594	0.00788212	0.779904	0.503712	2.3775	1.63996
1279	0	28801.7	9297.05	0		0.1453	0.435229	0.0163633	0.0071218	0.0106432	0.618935	0.545297	1.6951	1.03591
1280	0	28811.7	9297.05	0		0.197882	0.399792	0.0215773	0.00862643	0.0109588	0.728109	0.524513	1.73162	1.15255
1281	0	28821.7	9297.05	0		0.218881	0.38817	0.0176664	0.00685757	0.00811027	0.7821	0.575635	1.87209	1.16148
1282	0	28831.7	9297.05	0		0.149992	0.459467	0.0145346	0.00667815	0.00721576	0.856054	0.514177	1.83028	1.29876
1283	0	28841.7	9297.05	0		0.207695	0.500076	0.0135359	0.006769	0.00937792	0.667645	0.496533	2.58833	1.25254
1284	0	28851.7	9297.05	0		0.285776	0.575045	0.0182024	0.0104672	0.0103195	0.938206	0.675759	1.7728	1.5284
1285	0	28861.7	9297.05	0		0.0239648	0.291278	0.0378792	0.0110334	0.0117664	0.867343	0.526249	1.87305	1.23777
1286	0	28871.7	9297.05	0		0.0374841	0.234266	0.0444999	0.0104248	0.0113655	0.84841	0.463486	2.0268	1.37823
1287	0	28881.7	9297.05	0		0.164934	0.529818	0.177044	0.0938013	0.00817194	0.824954	0.449963	3.05625	1.2379
1288	0	28891.7	9297.05	0		0.125462	0.664754	0.0120899	0.00803679	0.00842699	0.88214	0.483849	2.42845	1.35885
1289	0	28901.7	9297.05	0		0.168667	0.687864	0.125357	0.0862288	0.00779136	0.842564	0.494113	2.11806	1.23742
1290	0	28911.7	9297.05	0		0.159934	0.488999	0.0143687	0.00702626	0.00652069	0.996686	0.50188	2.12566	1.42361
1291	0	28921.7	9297.05	0		0.022328	0.257486	0.039261	0.0101092	0.0102504	0.912222	0.527771	2.10746	1.20925
1292	0	28931.7	9297.05	0		0.0404136	0.239691	0.0696039	0.0166834	0.0255203	0.604682	0.526678	2.151	1.35751
1293	0	28941.7	9297.05	0		0.0341573	0.310177	0.0401866	0.012465	0.0166194	0.693752	0.518634	1.95635	1.42385
1294	0	28951.7	9297.05	0		0.0492343	0.239047	0.0717299	0.0171468	0.0246001	0.644724	0.485486	2.33408	1.37957
1295	0	28961.7	9297.05	0		0.0236325	0.204444	0.0433748	0.00886771	0.0103675	0.791162	0.497566	2.53638	1.39895
1296	0	28971.7	9297.05	0		0.0185339	0.268881	0.0247268	0.00664858	0.00842644	0.729814	0.638948	2.4412	1.18503
1297	0	28981.7	9297.05	0		0.030735	0.303244	0.0386538	0.0117215	0.0156196	0.694131	0.630936	1.99987	1.24263
1298	0	28991.7	9297.05	0		0.0237891	0.316608	0.0280281	0.00887392	0.00980017	0.837548	0.58199	2.11146	1.33234
1299	0	29001.7	9297.05	0		0.0290832	0.218056	0.0524216	0.0114308	0.0129102	0.818981	0.505114	2.27071	1.1286
1300	0	29011.7	9297.05	0		0.0395181	0.265913	0.0486707	0.0129421	0.0202171	0.592126	0.519858	2.41986	1.36326
1301	0	29021.7	9297.05	0		0.0338948	0.287134	0.0465655	0.0133705	0.0202403	0.611025	0.491944	2.33427	1.25477
1302	0	29031.7	9297.05	0		0.0224195	0.344213	0.0282327	0.00971806	0.0115814	0.776148	0.509675	2.49473	1.24518
1303	0	29041.7	9297.05	0		0.0215118	0.380947	0.0267183	0.0101783	0.0112993	0.833202	0.539195	2.24854	1.29035
1304	0	29051.7	9297.05	0		0.0386405	0.294427	0.0519178	0.015286	0.0191754	0.737354	0.588742	2.2396	1.23741
1305	0	29061.7	9297.05	0		0.150488	0.611565	0.0104366	0.00638265	0.0067246	0.877934	0.646398	1.84142	1.15567
1306	0	29071.7	9297.05	0		0.0159286	0.502741	0.0167508	0.00842131	0.00890419	0.874808	0.641662	1.94367	0.92142
1307	0	29081.7	9297.05	0		0.0265107	0.359053	0.0352767	0.0126662	0.0141588	0.827463	0.663554	2.1855	1.21081
1308	0	29091.7	9297.05	0		0.0324801	0.372733	0.0466453	0.0173862	0.0227976	0.705414	0.665698	1.90277	1.24938
1309	0	29101.7	9297.05	0		0.0390702	0.485424	0.207712	0.100828	0.0135158	0.772266	0.692956	2.39489	1.26664
1310	0	29111.7	9297.05	0		0.161997	0.666645	0.137852	0.0918986	0.0130552	0.720596	0.567116	2.50841	1.09135
1311	0	29121.7	9297.05	0		0.0106588	0.527937	0.00754071	0.00398102	0.0708947	0.861213	0.66734	2.71059	0.95966
1312	0	29131.7	9297.05	0		0.0120284	0.751886	0.137146	0.103118	0.00586627	0.898354	0.821375	3.51504	0.514428
1313	0	29141.7	9297.05	0		0.0101271	0.766629	0.00755048	0.00578842	0.00635657	0.842297	0.573916	2.77971	0.954243
1314	0	29151.7	9297.05	0		0.287189	0.682762	0.0160112	0.0109319	0.0141499	0.714608	0.781511	2.48079	0.842144
1315	0	29161.7	9297.05	0		0.0292292	0.540754	0.0234867	0.0127005	0.017648	0.665663	0.795712	2.61963	0.856697
1316	0	29171.7	9297.05	0		0.0281963	0.487529	0.0234132	0.0114146	0.0113824	0.927587	0.778913	2.80143	0.775089
1317	0	29181.7	9297.05	0		0.0201639	0.492726	0.0162805	0.00802184	0.00875077	0.847921	0.879312	2.62575	0.805834
1318	0	29191.7	9297.05	0		0.031801	0.535284	0.0253424	0.0135654	0.0228731	0.548572	1.16231	2.33956	0.82867
1319	0	29201.7	9297.05	0		0.0234298	0.567886	0.017194	0.0097642	0.0146508	0.616455	0.955952	2.36694	0.678227
1320	0	29211.7	9297.05	0		0.0227539	0.395366	0.0229637	0.00907905	0.0145298	0.577974	0.945906	2.1355	0.692759
1321	0	29221.7	9297.05	0		0.19179	0.559354	0.0211623	0.0118372	0.0257311	0.425519	1.00296	2.44768	0.708852
1322	0	29231.7	9297.05	0		0.0150678	0.604421	0.205542	0.124234	0.00767159	0.726732	0.820862	2.56755	0.937242
1323	0	29241.7	9297.05	0		0.0166431	0.629674	0.0114457	0.00720709	0.00781525	0.852991	0.774534	3.27141	0.528572
1324	0	29251.7	9297.05	0		0.255635	0.550207	0.0137938	0.00758942	0.0106025	0.662108	1.06224	2.87675	0.772952
1325	0	29261.7	9297.05	0		0.0211417	0.539203	0.0177229	0.00955624	0.0160623	0.55031	0.991468	2.7408	0.771804
1326	0	29271.7	9297.05	0		0.277007	0.633192	0.0169999	0.0107642	0.0140865	0.706817	1.1128	2.55997	0.588132
1327	0	27891.7	9287.05	0		0.25228	1.14362	0.170777	0.195305	0.00576577	1.25529	0.804363	2.21739	0.700789
1328	0	27901.7	9287.05	0		0.204038	1.08638	0.139051	0.151063	0.00674174	0.782979	0.643701	2.24282	0.741668
1329	0	27911.7	9287.05	0		0.278197	0.74	0.0089332	0.00661057	0.00836845	0.730671	0.750093	2.33792	0.934587
1330	0	27921.7	9287.05	0		0.178827	0.884193	0.113107	0.100009	0.00790015	0.772801	0.835529	2.49052	1.67064
1331	0	27931.7	9287.05	0		0.0137889	0.979598	0.0102705	0.010061	0.0109708	0.848256	0.802911	3.09391	0.937891
1332	0	27941.7	9287.05	0		0.199323	0.875622	0.00987964	0.00865083	0.0107872	0.741786	0.772779	3.6788	0.629886
1333	0	27951.7	9287.05	0		0.157343	0.921755	0.0936561	0.086328	0.0111094	0.657331	0.888034	2.41585	0.538057
1334	0	27961.7	9287.05	0		0.184434	0.916294	0.0953145	0.0873361	0.00852125	0.738769	0.836203	2.94015	0.731887
1335	0	27971.7	9287.05	0		0.0130839	0.646759	0.0120217	0.00777511	0.00887315	0.810506	1.07488	1.79869	0.811309
1336	0	27981.7	9287.05	0		0.141501	0.713716	0.161759	0.11545	0.00781162	0.875672	0.952865	2.30523	0.676514
1337	0	27991.7	9287.05	0		0.211945	0.999744	0.116181	0.116151	0.0082187	0.964474	0.752024	3.06469	1.14515
1338	0	28001.7	9287.05	0		0.203376	1.02029	0.111259	0.113516	0.00692201	1.0491	0.911354	2.71369	1.36154
1339	0	28011.7	9287.05	0		0.171371	1.05532	0.0908022	0.0958252	0.00632122	1.12487	0.721315	2.67142	0.997679
1340	0	28021.7	9287.05	0		0.0372225	0.573335	0.0310026	0.0177749	0.0182393	0.901418	1.10092	1.98448	0.685423
1341	0	28031.7	9287.05	0		0.0712561	0.344865	0.062592	0.0215858	0.0238585	0.836858	1.05531	2.08371	0.901476
1342	0	28041.7	9287.05	0		0.025974	0.566943	0.0236036	0.0133819	0.0114508	1.08096	1.093	1.90931	0.932979
1343	0	28051.7	9287.05	0		0.150999	0.713731	0.00878334	0.00626895	0.00594473	0.975416	0.802338	1.51663	0.861223
1344	0	28061.7	9287.05	0		0.0159668	0.475537	0.020245	0.00962724	0.0108015	0.824414	1.03165	1.34106	0.620366
1345	0	28071.7	9287.05	0		0.0312744	0.345556	0.0490078	0.016935	0.0206013	0.760357	1.03616	1.59809	0.745964
1346	0	28081.7	9287.05	0		0.1427	0.534076	0.0138089	0.00737502	0.00744883	0.915805	1.01365	1.6535	0.894109
1347	0	28091.7	9287.05	0		0.150198	0.59402	0.0097405	0.00578606	0.00524448	1.02049	0.57016	2.3824	0.930017
1348	0	28101.7	9287.05	0		0.149811	0.621122	0.0110704	0.00687606	0.085434	0.963544	0.538446	2.36978	1.34107
1349	0	28111.7	9287.05	0		0.171649	0.901269	0.00880415	0.00793491	0.0062818	1.16838	0.521202	2.05999	1.11536
1350	0	28121.7	9287.05	0		0.208301	0.726992	0.0988123	0.0718358	0.00700995	0.92791	0.574333	2.14357	1.20656
1351	0	28131.7	9287.05	0		0.148261	0.542174	0.01138	0.00616994	0.0936574	0.916309	0.533596	2.27203	1.19247
1352	0	28141.7	9287.05	0		0.028681	0.306315	0.039314	0.0120425	0.0126597	0.879873	0.464817	2.47548	1.34913
1353	0	28151.7	9287.05	0		0.0404484	0.204929	0.0690467	0.0141497	0.0171064	0.765097	0.536563	1.85976	1.25533
1354	0	28161.7	9287.05	0		0.0510475	0.221008	0.0718842	0.015887	0.0174706	0.841125	0.430907	1.98635	1.51964
1355	0	28171.7	9287.05	0		0.016716	0.404284	0.0236975	0.00958051	0.0115588	0.766664	0.533455	2.04	1.48425
1356	0	28181.7	9287.05	0		0.165258	0.305978	0.0215219	0.00658524	0.00743301	0.819472	0.448274	2.53345	1.13274
1357	0	28191.7	9287.05	0		0.017757	0.249205	0.0378546	0.00943354	0.01172	0.744516	0.350022	2.3672	1.34047
1358	0	28201.7	9287.05	0		0.0331717	0.234313	0.0508991	0.0119263	0.0124057	0.889227	0.394191	2.65296	1.37867
1359	0	28211.7	9287.05	0		0.236843	0.283467	0.0270968	0.00768105	0.00750074	0.947205	0.42568	2.62157	1.46489
1360	0	28221.7	9287.05	0		0.0309002	0.266808	0.0398336	0.0106279	0.00975869	1.00736	0.393488	2.43111	1.47431
1361	0	28231.7	9287.05	0		0.0202879	0.486179	0.0209885	0.0102042	0.00725384	1.30118	0.519898	2.42041	1.36293
1362	0	28241.7	9287.05	0		0.0110881	0.472167	0.0168902	0.00797502	0.00554895	1.32938	0.548018	2.70388	1.47745
1363	0	28251.7	9287.05	0		0.0247278	0.266688	0.0395812	0.0105558	0.00746917	1.30722	0.426652	2.17614	1.40245
1364	0	28261.7	9287.05	0		0.052489	0.170827	0.119268	0.0203742	0.022925	0.822052	0.398086	2.12436	1.56305
1365	0	28271.7	9287.05	0		0.0388915	0.221753	0.0727513	0.0161328	0.0168313	0.886584	0.424083	2.24479	1.42329
1366	0	28281.7	9287.05	0		0.0124369	0.405854	0.0216728	0.00879602	0.00764816	1.06379	0.378617	2.32934	1.41201
1367	0	28291.7	9287.05	0		0.251546	0.257587	0.0449746	0.0115849	0.0118905	0.901197	0.461889	2.24458	1.41749
1368	0	28301.7	9287.05	0		0.0238318	0.201804	0.0446713	0.00901485	0.00916318	0.909997	0.4677	1.89107	1.57547
1369	0	28311.7	9287.05	0		0.164834	0.244325	0.0388838	0.00950028	0.0103042	0.852806	0.421218	1.90133	1.24267
1370	0	28321.7	9287.05	0		0.267171	0.192326	0.0737683	0.0141876	0.0150612	0.871315	0.409909	2.13412	1.38166
1371	0	28331.7	9287.05	0		0.127599	0.318707	0.0221477	0.00705864	0.00588855	1.10877	0.40257	2.061	1.29051
1372	0	28341.7	9287.05	0		0.253893	0.307955	0.0273399	0.00841949	0.00807027	0.964995	0.442978	1.81886	1.14764
1373	0	28351.7	9287.05	0		0.169181	0.485124	0.0127158	0.00616875	0.00679458	0.839773	0.482372	2.8869	1.3514
1374	0	28361.7	9287.05	0		0.183887	0.720389	0.0801193	0.0577171	0.00712817	0.781868	0.488599	2.40214	1.19063
1375	0	28371.7	9287.05	0		0.205295	0.460541	0.193627	0.0891734	0.00781331	0.784064	0.505896	2.09811	1.32987
1376	0	28381.7	9287.05	0		0.147306	0.399906	0.0181871	0.00727312	0.00972699	0.691624	0.474063	1.98669	1.20933
1377	0	28391.7	9287.05	0		0.18881	0.422057	0.130135	0.0549243	0.00810983	0.721007	0.378987	2.30567	1.34231
1378	0	28401.7	9287.05	0		0.243972	0.399642	0.0134901	0.00539121	0.00711341	0.701029	0.427739	2.63284	1.30065
1379	0	28411.7	9287.05	0		0.233276	0.356192	0.0183924	0.0065512	0.00798942	0.758462	0.498837	2.36016	1.28965
1380	0	28421.7	9287.05	0		0.260832	0.364042	0.0181905	0.00662213	0.00719105	0.851791	0.382108	2.3441	1.23019
1381	0	28431.7	9287.05	0		0.150187	0.351786	0.0179928	0.0063296	0.00732552	0.799219	0.427449	1.97159	0.987022
1382	0	28441.7	9287.05	0		0.139381	0.305367	0.0216298	0.00660502	0.00760606	0.803234	0.474672	1.85625	1.08307
1383	0	28451.7	9287.05	0		0.11505	0.217455	0.0224185	0.00487501	0.00586087	0.769381	0.524207	2.14751	1.0887
1384	0	28461.7	9287.05	0		0.148227	0.29678	0.0193786	0.00575119	0.00649581	0.818941	0.482089	2.24475	1.33742
1385	0	28471.7	9287.05	0		0.159212	0.363407	0.117716	0.0427787	0.00504314	0.871616	0.49071	1.71039	1.32144
1386	0	28481.7	9287.05	0		0.174449	0.227724	0.0269305	0.00613273	0.0062938	0.901298	0.551391	1.86605	1.13496
1387	0	28491.7	9287.05	0		0.233578	0.357139	0.0154819	0.00552919	0.00565557	0.904301	0.434581	2.13676	1.18305
1388	0	28501.7	9287.05	0		0.151617	0.334542	0.014149	0.00473343	0.0512845	0.955274	0.468332	2.03117	1.36257
1389	0	28511.7	9287.05	0		0.159233	0.358585	0.014218	0.00509835	0.0605071	1.09957	0.420749	2.2136	1.26899
1390	0	28521.7	9287.05	0		0.0199417	0.239785	0.0332499	0.0079728	0.075656	1.00157	0.471716	2.03914	1.21698
1391	0	28531.7	9287.05	0		0.210881	0.352833	0.017133	0.00604509	0.00661107	0.845783	0.505697	1.86679	1.31072
1392	0	28541.7	9287.05	0		0.215588	0.421467	0.130041	0.0548081	0.0733186	0.725609	0.405082	2.09867	1.08437
1393	0	28551.7	9287.05	0		0.145233	0.47858	0.0998382	0.0477805	0.00535306	0.826106	0.44036	2.24522	0.991874
1394	0	28561.7	9287.05	0		0.199736	0.413817	0.011275	0.0046658	0.0578363	0.702373	0.534976	1.93592	1.04887
1395	0	28571.7	9287.05	0		0.195	0.368049	0.0163758	0.0060271	0.00635623	0.877075	0.457997	2.2737	1.30931
1396	0	28581.7	9287.05	0		0.159244	0.292374	0.0220485	0.00644641	0.00710737	0.838951	0.480074	2.2304	1.22007
1397	0	28591.7	9287.05	0		0.202583	0.246247	0.0423974	0.0104402	0.0141279	0.683532	0.40395	2.27141	1.27513
1398	0	28601.7	9287.05	0		0.176632	0.321668	0.020878	0.00671577	0.00575122	1.0801	0.386129	2.34084	1.19014
1399	0	28611.7	9287.05	0		0.156451	0.327714	0.107805	0.0353292	0.0555405	0.886458	0.39762	2.46999	1.06601
1400	0	28621.7	9287.05	0		0.181916	0.343455	0.0112311	0.00385737	0.00448661	0.795245	0.441738	2.34884	1.28203
1401	0	28631.7	9287.05	0		0.137896	0.344649	0.0139013	0.00479105	0.00526801	0.841225	0.448291	2.42941	1.36993
1402	0	28641.7	9287.05	0		0.0134262	0.280815	0.0256372	0.00719932	0.00732992	0.908489	0.475707	1.95988	1.38578
1403	0	28651.7	9287.05	0		0.0166451	0.314402	0.0249373	0.00784034	0.00821485	0.8828	0.441761	2.46186	1.24241
1404	0	28661.7	9287.05	0		0.0291069	0.217499	0.0492442	0.0107106	0.0107196	0.924188	0.423435	2.61643	1.52271
1405	0	28671.7	9287.05	0		0.374882	0.272486	0.415698	0.113272	0.00635559	1.29213	0.361734	2.83218	1.35472
1406	0	28681.7	9287.05	0		0.213543	0.263804	0.0458754	0.0121021	0.0844292	0.875079	0.405335	2.23155	1.3728
1407	0	28691.7	9287.05	0		0.215792	0.233186	0.0374476	0.00873226	0.00922979	0.87511	0.461274	2.24929	1.25947
1408	0	28701.7	9287.05	0		0.129518	0.278149	0.0272479	0.00757897	0.0082447	0.850281	0.455019	1.99269	0.988674
1409	0	28711.7	9287.05	0		0.155011	0.353008	0.0170048	0.00600283	0.00655455	0.847112	0.432434	1.92306	1.15382
1410	0	28721.7	9287.05	0		0.168626	0.398248	0.0150254	0.00598383	0.0085215	0.649518	0.595618	1.60799	1.3561
1411	0	28731.7	9287.05	0		0.151382	0.364983	0.0159085	0.00580634	0.0077698	0.691226	0.478872	1.44206	1.29093
1412	0	28741.7	9287.05	0		0.180197	0.360868	0.0188467	0.00680116	0.00760369	0.827344	0.423342	1.94827	1.29158
1413	0	28751.7	9287.05	0		0.189837	0.197427	0.0324588	0.00640823	0.00754683	0.785418	0.542088	1.82037	1.24521
1414	0	28761.7	9287.05	0		0.144848	0.495156	0.0115512	0.00571964	0.00589489	0.897471	0.472869	2.12753	1.05447
1415	0	28771.7	9287.05	0		0.163416	0.435067	0.0148468	0.00645937	0.00690192	0.86566	0.442721	2.70017	0.972585
1416	0	28781.7	9287.05	0		0.219186	0.322574	0.021228	0.00684761	0.00827144	0.765748	0.450219	2.00712	1.08801
1417	0	28791.7	9287.05	0		0.194282	0.525812	0.0132678	0.00697637	0.00702689	0.91832	0.526066	1.74931	1.33244
1418	0	28801.7	9287.05	0		0.220293	0.570199	0.0114743	0.00654261	0.00828621	0.730336	0.475039	2.22217	1.36097
1419	0	28811.7	9287.05	0		0.168828	0.694528	0.0112482	0.00781221	0.00897209	0.805393	0.35353	1.92463	1.30178
1420	0	28821.7	9287.05	0		0.151163	0.411965	0.0166987	0.00687929	0.00918775	0.692567	0.467551	1.94876	1.43074
1421	0	28831.7	9287.05	0		0.157394	0.589576	0.0150149	0.00885244	0.0126935	0.645075	0.491427	2.188	1.37146
1422	0	28841.7	9287.05	0		0.14521	0.58518	0.0136516	0.00798867	0.00880931	0.838803	0.536311	1.38882	1.52867
1423	0	28851.7	9287.05	0		0.20525	0.533425	0.0128838	0.00687253	0.00764147	0.831893	0.543746	2.11769	1.5288
1424	0	28861.7	9287.05	0		0.0138003	0.444846	0.0166287	0.00739722	0.00709408	0.964495	0.455138	2.52559	1.12827
1425	0	28871.7	9287.05	0		0.0344247	0.203141	0.0551687	0.011207	0.0156821	0.66102	0.547743	1.77202	1.46942
1426	0	28881.7	9287.05	0		0.240765	0.391603	0.0224963	0.00880964	0.00810525	1.00536	0.517314	2.23908	1.5163
1427	0	28891.7	9287.05	0		0.0187863	0.352569	0.0275706	0.00972053	0.0111412	0.807024	0.522581	2.30993	1.2212
1428	0	28901.7	9287.05	0		0.117177	0.467162	0.0145807	0.00681154	0.00888336	0.709244	0.450692	2.80825	1.26861
1429	0	28911.7	9287.05	0		0.188309	0.407922	0.0166756	0.00680234	0.00836371	0.752293	0.559766	1.70693	1.32994
1430	0	28921.7	9287.05	0		0.0523462	0.219072	0.0714764	0.0156585	0.0232477	0.623013	0.515582	2.15626	1.30944
1431	0	28931.7	9287.05	0		0.0347384	0.255278	0.0515778	0.0131667	0.0172256	0.707016	0.508623	2.26142	1.38047
1432	0	28941.7	9287.05	0		0.21264	0.275206	0.0467933	0.0128778	0.0217261	0.548262	0.551574	2.2296	1.36113
1433	0	28951.7	9287.05	0		0.0340069	0.372973	0.0426513	0.0159078	0.0224771	0.654632	0.471724	2.81963	1.33858
1434	0	28961.7	9287.05	0		0.0416043	0.22909	0.0645958	0.0147983	0.0196694	0.695903	0.528518	2.7797	1.48613
1435	0	28971.7	9287.05	0		0.153621	0.332832	0.0202827	0.00675074	0.00865849	0.721169	0.492353	2.56198	1.33244
1436	0	28981.7	9287.05	0		0.236167	0.376872	0.0168541	0.00635185	0.00831789	0.706342	0.596926	2.13907	1.00968
1437	0	28991.7	9287.05	0		0.0265836	0.277572	0.0501086	0.0139088	0.0184382	0.697746	0.57856	2.07147	1.3515
1438	0	29001.7	9287.05	0		0.0214419	0.348365	0.0258876	0.00901834	0.0112294	0.742846	0.547541	2.1271	1.18014
1439	0	29011.7	9287.05	0		0.041948	0.352326	0.0454629	0.0160178	0.0206761	0.716572	0.498287	2.33042	1.47497
1440	0	29021.7	9287.05	0		0.0563354	0.337874	0.0506614	0.0171172	0.0187999	0.842179	0.476214	2.59203	1.37064
1441	0	29031.7	9287.05	0		0.207439	0.314077	0.0315156	0.00989833	0.0128234	0.713979	0.459207	2.47762	1.36289
1442	0	29041.7	9287.05	0		0.0163865	0.461813	0.0135157	0.00624174	0.00695279	0.830375	0.501105	2.32228	1.19812
1443	0	29051.7	9287.05	0		0.0401816	0.258177	0.0567391	0.0146487	0.0148114	0.914812	0.551469	2.25634	1.30151
1444	0	29061.7	9287.05	0		0.11285	0.645454	0.00790635	0.00510319	0.0629253	0.869808	0.516551	2.33274	1.23613
1445	0	29071.7	9287.05	0		0.0116943	0.740566	0.123581	0.0915197	0.00577644	1.04589	0.702023	2.55304	1.15446
1446	0	29081.7	9287.05	0		0.0140489	0.549796	0.0136452	0.0075021	0.00696663	0.996064	0.663403	2.54537	0.968563
1447	0	29091.7	9287.05	0		0.348248	0.260844	0.0400177	0.0104384	0.00902062	1.07034	0.667815	1.9375	1.11403
1448	0	29101.7	9287.05	0		0.0312657	0.453941	0.022762	0.0103326	0.0104505	0.914537	0.635422	2.26407	1.28606
1449	0	29111.7	9287.05	0		0.0404335	0.532163	0.0239977	0.0127707	0.015734	0.75076	0.581312	2.61396	1.1475
1450	0	29121.7	9287.05	0		0.0374676	0.521117	0.0226313	0.0117936	0.0126246	0.864082	0.678201	2.4605	1.13464
1451	0	29131.7	9287.05	0		0.0191392	0.569529	0.128303	0.0730724	0.00924268	0.865471	0.520826	2.36558	1.07397
1452	0	29141.7	9287.05	0		0.0179522	0.515135	0.0147397	0.00759296	0.00952895	0.737045	0.582452	2.20965	1.0096
1453	0	29151.7	9287.05	0		0.585471	0.0286717	0.718835	0.0206102	0.0256562	0.743051	0.748962	2.18404	1.01238
1454	0	29161.7	9287.05	0		0.393441	0.521533	0.0301111	0.0157039	0.0266885	0.544266	0.714621	2.70434	0.908167
1455	0	29171.7	9287.05	0		0.0462311	0.48213	0.0316293	0.0152494	0.0225831	0.624594	0.788396	2.46176	0.871389
1456	0	29181.7	9287.05	0		0.166429	0.476633	0.137912	0.0657335	0.00489396	0.983134	0.664321	2.76114	0.875964
1457	0	29191.7	9287.05	0		0.0212669	0.457145	0.0167221	0.00764443	0.0109672	0.64473	0.756268	3.07241	0.906424
1458	0	29201.7	9287.05	0		0.0213931	0.466181	0.0180891	0.00843279	0.0106331	0.733568	0.821996	2.65039	0.738686
1459	0	29211.7	9287.05	0		0.0274963	0.554232	0.0211577	0.0117263	0.0194502	0.557653	0.964169	2.28082	0.917498
1460	0	29221.7	9287.05	0		0.342271	0.445862	0.0270619	0.0120659	0.0268453	0.415737	0.884799	2.20079	0.801696
1461	0	29231.7	9287.05	0		0.0238025	0.514388	0.0183762	0.0094525	0.0126215	0.692729	0.948355	2.06146	0.678615
1462	0	29241.7	9287.05	0		0.0200132	0.707689	0.0126798	0.00897335	0.00875917	0.947587	0.888085	3.6542	0.626646
1463	0	29251.7	9287.05	0		0.0243133	0.701565	0.22312	0.156533	0.00993043	0.833009	0.774715	3.16608	0.516113
1464	0	29261.7	9287.05	0		0.0155543	0.515812	0.0125261	0.00646113	0.00794599	0.752121	1.02375	2.28206	0.564318
1465	0	29271.7	9287.05	0		0.260426	0.421292	0.0131175	0.00552631	0.00790528	0.646614	0.762346	3.11652	0.820688
1466	0	29281.7	9287.05	0		0.0226789	0.265024	0.0236101	0.00625723	0.00860467	0.672629	0.936311	2.28595	0.558447
1467	0	29291.7	9287.05	0		0.296976	0.450212	0.011106	0.00500005	0.00641279	0.721198	0.931993	3.14296	0.709708
1468	0	27881.7	9277.05	0		0.239371	1.2877	0.22496	0.28968	0.00582209	1.08322	0.92895	1.91026	0.720659
1469	0	27891.7	9277.05	0		0.223074	1.40637	0.152938	0.215088	0.00574299	0.904428	0.870466	2.72834	0.817865
1470	0	27901.7	9277.05	0		0.19421	1.09056	0.0694443	0.0757334	0.0082504	0.762299	0.694427	2.52071	0.685732
1471	0	27911.7	9277.05	0		0.184674	0.770168	0.0108484	0.00835512	0.00899761	0.85892	0.75809	2.96779	0.744489
1472	0	27921.7	9277.05	0		0.0154869	0.982293	0.00998858	0.00981171	0.0124968	0.726228	0.878507	2.05397	0.71736
1473	0	27931.7	9277.05	0		0.174374	0.794242	0.119164	0.0946455	0.0102845	0.699097	0.781052	2.76458	1.19346
1474	0	27941.7	9277.05	0		0.14686	0.970288	0.124637	0.120934	0.00843188	0.876658	0.657306	2.29926	0.843433
1475	0	27951.7	9277.05	0		0.227018	0.932186	0.0102093	0.00951698	0.00900127	0.977964	1.03933	1.69887	0.768346
1476	0	27961.7	9277.05	0		0.0183636	0.665049	0.0134354	0.00893519	0.0109158	0.757141	0.688325	2.54304	1.33264
1477	0	27971.7	9277.05	0		0.0340461	0.397767	0.0345461	0.0137413	0.0176449	0.720336	0.762936	2.46585	1.02651
1478	0	27981.7	9277.05	0		0.0695525	0.277951	0.0835441	0.0232212	0.032616	0.658538	0.934921	2.20764	0.881889
1479	0	27991.7	9277.05	0		0.283253	0.571009	0.0193099	0.0110261	0.0139771	0.729683	1.04152	2.48485	0.996028
1480	0	28001.7	9277.05	0		0.00937431	0.724667	0.119181	0.0863665	0.00783819	0.830389	0.780316	2.86734	0.841056
1481	0	28011.7	9277.05	0		0.144567	0.661553	0.00929324	0.00614797	0.00585326	0.971542	0.896391	1.72522	0.902871
1482	0	28021.7	9277.05	0		0.0497645	0.463231	0.0414748	0.0192124	0.02073	0.857255	0.880289	2.6143	0.815967
1483	0	28031.7	9277.05	0		0.0647975	0.494541	0.0611476	0.03024	0.0306753	0.911842	0.979906	1.97401	1.18658
1484	0	28041.7	9277.05	0		0.0188196	0.477877	0.0187833	0.00897609	0.00932521	0.890341	0.707649	2.12047	0.775038
1485	0	28051.7	9277.05	0		0.197581	0.532948	0.013244	0.00705834	0.00751924	0.868273	0.892642	1.90911	0.702871
1486	0	28061.7	9277.05	0		0.198585	0.590243	0.0117397	0.00692927	0.00826794	0.775207	0.644709	2.44049	1.86905
1487	0	28071.7	9277.05	0		0.210851	0.503686	0.0123456	0.00621832	0.00671926	0.856011	0.743912	2.17962	1.13139
1488	0	28081.7	9277.05	0		0.240193	0.674063	0.116893	0.0787936	0.00584621	0.997594	0.571963	2.37557	1.02619
1489	0	28091.7	9277.05	0		0.169313	0.556998	0.0114581	0.00638214	0.00676963	0.872024	0.669304	1.86907	1.32823
1490	0	28101.7	9277.05	0		0.183145	0.441675	0.0158861	0.0070165	0.00704881	0.92073	0.566464	1.83666	1.04412
1491	0	28111.7	9277.05	0		0.216931	0.736243	0.0124901	0.00919574	0.00854204	0.995755	0.473931	1.89027	1.08166
1492	0	28121.7	9277.05	0		0.179472	0.509557	0.0145817	0.00743023	0.00810488	0.847975	0.524084	1.7159	1.11786
1493	0	28131.7	9277.05	0		0.223031	0.364549	0.0238749	0.00870356	0.00971098	0.829013	0.425599	2.1404	1.29789
1494	0	28141.7	9277.05	0		0.014343	0.399936	0.0173446	0.00693672	0.00711511	0.901779	0.411634	2.21457	1.12966
1495	0	28151.7	9277.05	0		0.0293734	0.321271	0.039221	0.0126006	0.0132128	0.882109	0.444436	2.17548	1.29116
1496	0	28161.7	9277.05	0		0.0334775	0.281817	0.0437539	0.0123306	0.0147856	0.771388	0.443909	1.9586	1.33578
1497	0	28171.7	9277.05	0		0.165223	0.358772	0.0173012	0.00620717	0.00626813	0.915974	0.427257	2.08011	1.23286
1498	0	28181.7	9277.05	0		0.169543	0.520464	0.0104348	0.00543096	0.00586364	0.856716	0.639209	2.2482	1.30622
1499	0	28191.7	9277.05	0		0.144575	0.363795	0.0179975	0.00654742	0.00797525	0.759369	0.371075	2.67098	1.19834
1500	0	28201.7	9277.05	0		0.0173944	0.304429	0.0283466	0.00862952	0.00808307	0.987501	0.395743	2.45762	1.42256
1501	0	28211.7	9277.05	0		0.0343736	0.209299	0.0499127	0.0104467	0.00951307	1.01575	0.368303	2.85494	1.37581
1502	0	28221.7	9277.05	0		0.0404007	0.21858	0.0538721	0.0117754	0.00948278	1.14859	0.3307	2.75564	1.47094
1503	0	28231.7	9277.05	0		0.0319622	0.380169	0.0468036	0.0177933	0.0113292	1.45273	0.348509	2.69478	1.34928
1504	0	28241.7	9277.05	0		0.240762	0.442534	0.0214631	0.00949816	0.00670667	1.30997	0.392494	2.48592	1.63927
1505	0	28251.7	9277.05	0		0.147656	0.36106	0.0195784	0.00706897	0.00641488	1.01928	0.391865	2.01957	1.2849
1506	0	28261.7	9277.05	0		0.202815	0.336019	0.0239059	0.00803285	0.00656412	1.13193	0.431338	1.8859	1.39092
1507	0	28271.7	9277.05	0		0.177595	0.370665	0.0227782	0.00844308	0.0828932	0.985955	0.450416	2.02594	1.48882
1508	0	28281.7	9277.05	0		0.115757	0.539921	0.0172438	0.00931028	0.00823485	1.04577	0.444878	1.9251	1.33931
1509	0	28291.7	9277.05	0		0.173044	0.469067	0.015474	0.00725833	0.00595026	1.12831	0.488731	2.19075	1.50933
1510	0	28301.7	9277.05	0		0.161498	0.426163	0.0173697	0.00740232	0.00645439	1.06082	0.494344	1.7559	1.35431
1511	0	28311.7	9277.05	0		0.0124938	0.4402	0.0164552	0.00724357	0.00634145	1.05655	0.459017	2.39508	1.19338
1512	0	28321.7	9277.05	0		0.182987	0.436821	0.013037	0.00569486	0.00444656	1.18464	0.467392	1.79548	0.866063
1513	0	28331.7	9277.05	0		0.108908	0.595832	0.0111917	0.0066684	0.0602784	1.28219	0.445463	2.08039	1.0477
1514	0	28341.7	9277.05	0		0.163671	0.538304	0.140662	0.0757191	0.00486334	1.0589	0.370692	2.31836	1.36714
1515	0	28351.7	9277.05	0		0.199864	0.436241	0.014216	0.00620162	0.00675221	0.849545	0.531379	2.21858	1.47009
1516	0	28361.7	9277.05	0		0.172433	0.492626	0.0141153	0.00695356	0.00869543	0.739679	0.571035	2.47282	1.19285
1517	0	28371.7	9277.05	0		0.198487	0.446524	0.0170276	0.00760321	0.00838876	0.838352	0.472888	2.04872	1.21643
1518	0	28381.7	9277.05	0		0.179796	0.487477	0.0130816	0.00637696	0.00723714	0.815032	0.555965	2.15916	1.27568
1519	0	28391.7	9277.05	0		0.177871	0.499816	0.138874	0.0694112	0.00739398	0.913136	0.491042	2.04581	1.36581
1520	0	28401.7	9277.05	0		0.199776	0.389305	0.0159568	0.00621208	0.00707761	0.811854	0.460134	2.38314	1.39046
1521	0	28411.7	9277.05	0		0.210867	0.35507	0.0164318	0.00583444	0.00655652	0.823101	0.57209	2.04266	1.33146
1522	0	28421.7	9277.05	0		0.190533	0.415577	0.0177701	0.00738487	0.00753742	0.906249	0.50908	2.03249	1.27402
1523	0	28431.7	9277.05	0		0.0108567	0.3252	0.0221082	0.00718958	0.00643731	1.03306	0.52325	1.90106	1.20965
1524	0	28441.7	9277.05	0		0.17985	0.44733	0.0111878	0.00500464	0.0468507	1.16614	0.481515	2.26844	1.0855
1525	0	28451.7	9277.05	0		0.126057	0.3289	0.0123231	0.00405308	0.0488072	1.06304	0.549451	2.27616	1.21777
1526	0	28461.7	9277.05	0		0.124245	0.359387	0.0126861	0.00455923	0.00427913	0.985516	0.559998	1.82096	1.1156
1527	0	28471.7	9277.05	0		0.213829	0.448882	0.0109658	0.00492236	0.0423113	0.906748	0.424633	2.09779	1.03197
1528	0	28481.7	9277.05	0		0.154718	0.327578	0.117516	0.0384957	0.0480124	1.02008	0.555033	1.93439	1.12046
1529	0	28491.7	9277.05	0		0.161112	0.311245	0.0167228	0.00520487	0.0483661	1.25669	0.48745	2.23714	1.17923
1530	0	28501.7	9277.05	0		0.181218	0.475914	0.00727842	0.0034639	0.0472571	1.28371	0.544227	2.40919	1.1398
1531	0	28511.7	9277.05	0		0.191324	0.443132	0.116998	0.0518458	0.0379668	1.39587	0.421209	2.13808	0.998364
1532	0	28521.7	9277.05	0		0.193602	0.51674	0.00644216	0.00332892	0.0297919	1.16581	0.57373	2.26347	1.17617
1533	0	28531.7	9277.05	0		0.167753	0.432927	0.00918829	0.00397786	0.00395342	0.930687	0.515364	2.25579	1.06281
1534	0	28541.7	9277.05	0		0.161133	0.48483	0.0775445	0.0375959	0.00486311	0.825153	0.455142	1.838	1.00929
1535	0	28551.7	9277.05	0		0.194562	0.534134	0.0857116	0.0457815	0.0586975	0.802045	0.441441	2.02238	0.94891
1536	0	28561.7	9277.05	0		0.184686	0.539966	0.00866502	0.00467881	0.00513391	0.842976	0.450994	2.14308	1.25214
1537	0	28571.7	9277.05	0		0.203083	0.541868	0.115003	0.0623167	0.00508642	0.908066	0.587715	1.87386	1.12902
1538	0	28581.7	9277.05	0		0.189226	0.477676	0.126671	0.0605078	0.00584439	0.981592	0.543958	1.70759	1.10402
1539	0	28591.7	9277.05	0		0.226203	0.328419	0.197874	0.0649855	0.0687441	0.83261	0.419834	2.01351	1.21631
1540	0	28601.7	9277.05	0		0.0234916	0.339312	0.0246697	0.00837074	0.00792842	0.976573	0.421246	2.46933	1.39363
1541	0	28611.7	9277.05	0		0.0224214	0.166533	0.051008	0.0084945	0.00904624	0.868555	0.401098	2.31449	1.31281
1542	0	28621.7	9277.05	0		0.157407	0.330429	0.0125322	0.00414098	0.00507824	0.754254	0.395911	2.23924	1.12391
1543	0	28631.7	9277.05	0		0.131714	0.42228	0.0118608	0.0050086	0.00438569	1.05635	0.458221	2.72733	0.994609
1544	0	28641.7	9277.05	0		0.15922	0.463111	0.15674	0.0725881	0.00332257	1.25027	0.499948	2.34027	0.964162
1545	0	28651.7	9277.05	0		0.0120504	0.381155	0.0162265	0.00618481	0.00457228	1.25118	0.443736	2.64039	1.07557
1546	0	28661.7	9277.05	0		0.0225467	0.331191	0.0248372	0.00822587	0.00607188	1.2531	0.435723	3.29883	1.39543
1547	0	28671.7	9277.05	0		0.258207	0.280644	0.0285338	0.00800785	0.133922	0.869085	0.463855	2.63833	1.20842
1548	0	28681.7	9277.05	0		0.0139593	0.356336	0.0190752	0.00679718	0.00644343	0.975751	0.521892	2.31217	1.33903
1549	0	28691.7	9277.05	0		0.0106953	0.332327	0.0218721	0.00726868	0.00614229	1.09459	0.474832	2.09404	1.29143
1550	0	28701.7	9277.05	0		0.184644	0.30547	0.0171722	0.00524559	0.00508167	0.954807	0.498369	2.20693	1.09738
1551	0	28711.7	9277.05	0		0.132034	0.401697	0.0149431	0.0060026	0.0797666	0.990646	0.529506	2.74552	1.20653
1552	0	28721.7	9277.05	0		0.161592	0.395714	0.0155661	0.00615973	0.00701309	0.812419	0.425337	2.07296	1.32678
1553	0	28731.7	9277.05	0		0.197189	0.378691	0.015332	0.00580609	0.00623511	0.861325	0.48564	2.0625	1.2491
1554	0	28741.7	9277.05	0		0.175139	0.298625	0.0222243	0.00663672	0.00783992	0.783013	0.501332	1.80175	1.26439
1555	0	28751.7	9277.05	0		0.0306989	0.194943	0.0514131	0.0100226	0.0103099	0.899197	0.469924	2.18273	1.27944
1556	0	28761.7	9277.05	0		0.209301	0.365145	0.0209994	0.00766781	0.00747545	0.948771	0.533518	1.88512	1.30972
1557	0	28771.7	9277.05	0		0.157951	0.374901	0.0211141	0.00791572	0.00861159	0.850227	0.500928	1.7078	1.1687
1558	0	28781.7	9277.05	0		0.02897	0.292902	0.0365081	0.0106933	0.0104027	0.950804	0.438041	2.12104	1.23715
1559	0	28791.7	9277.05	0		0.111293	0.41999	0.0188488	0.00791631	0.00686988	1.06586	0.506444	1.72968	1.33464
1560	0	28801.7	9277.05	0		0.161787	0.450172	0.0112156	0.00504893	0.00509076	0.91737	0.577701	2.33072	1.11196
1561	0	28811.7	9277.05	0		0.171654	0.520235	0.190916	0.0993211	0.0095074	0.77328	0.396682	3.02324	1.26739
1562	0	28821.7	9277.05	0		0.214567	0.509503	0.132165	0.0673384	0.00756937	0.736857	0.492296	2.40227	1.12202
1563	0	28831.7	9277.05	0		0.165687	0.538584	0.112212	0.0604357	0.00938533	0.610306	0.373928	2.39914	1.22898
1564	0	28841.7	9277.05	0		0.196568	0.553763	0.0901496	0.0499215	0.00641883	0.722439	0.457203	2.12821	1.24789
1565	0	28851.7	9277.05	0		0.182164	0.494063	0.0129648	0.00640545	0.00765111	0.774378	0.548581	2.01952	1.36709
1566	0	28861.7	9277.05	0		0.0169213	0.235708	0.0328782	0.00774964	0.00882517	0.812243	0.489107	2.04616	1.24386
1567	0	28871.7	9277.05	0		0.0321498	0.281208	0.0455797	0.0128174	0.0191993	0.617507	0.454816	1.79387	1.36089
1568	0	28881.7	9277.05	0		0.0548884	0.214865	0.0873684	0.0187724	0.0303052	0.572968	0.479712	2.12289	1.46977
1569	0	28891.7	9277.05	0		0.018124	0.273606	0.0301964	0.0082619	0.0103058	0.741523	0.51308	2.04594	1.48191
1570	0	28901.7	9277.05	0		0.0241702	0.433834	0.0270431	0.0117322	0.0129148	0.840273	0.523477	1.97621	1.40316
1571	0	28911.7	9277.05	0		0.0103441	0.447069	0.0139715	0.00624624	0.00622835	0.927626	0.550998	2.28921	1.17199
1572	0	28921.7	9277.05	0		0.0294091	0.27393	0.0314029	0.0086022	0.0103538	0.768492	0.529378	2.17437	1.29586
1573	0	28931.7	9277.05	0		0.235858	0.194179	0.0543155	0.0105469	0.0123514	0.789833	0.521775	2.35305	1.3326
1574	0	28941.7	9277.05	0		0.033898	0.180176	0.0575739	0.0103734	0.0132515	0.724077	0.479689	2.79081	1.23121
1575	0	28951.7	9277.05	0		0.0290812	0.163138	0.0686976	0.0112072	0.0169141	0.612882	0.458667	2.74159	1.21726
1576	0	28961.7	9277.05	0		0.255987	0.3694	0.0300227	0.0110904	0.0121398	0.845015	0.560264	2.07742	1.32747
1577	0	28971.7	9277.05	0		0.0144381	0.317492	0.0210444	0.00668143	0.00911571	0.677963	0.550115	1.98344	1.19897
1578	0	28981.7	9277.05	0		0.152705	0.578826	0.0111115	0.00643163	0.117763	0.791553	0.542239	2.70843	1.239
1579	0	28991.7	9277.05	0		0.189787	0.475533	0.0193552	0.00920405	0.00965439	0.881824	0.598286	2.11031	1.35519
1580	0	29001.7	9277.05	0		0.01866	0.396679	0.0243723	0.00966799	0.00964719	0.926965	0.527331	3.06447	1.30442
1581	0	29011.7	9277.05	0		0.0382863	0.283719	0.0570635	0.01619	0.0133555	1.12128	0.471732	2.59747	1.3936
1582	0	29021.7	9277.05	0		0.0483522	0.352609	0.0553573	0.0195195	0.0305994	0.590042	0.460046	2.55139	1.51562
1583	0	29031.7	9277.05	0		0.0503032	0.374177	0.0614264	0.0229844	0.0284399	0.747537	0.505955	2.3587	1.49605
1584	0	29041.7	9277.05	0		0.0116359	0.490068	0.012159	0.00595872	0.00665509	0.828184	0.479216	3.0588	1.12194
1585	0	29051.7	9277.05	0		0.217785	0.560912	0.0103406	0.00580015	0.0059935	0.895131	0.572009	1.88178	1.23409
1586	0	29061.7	9277.05	0		0.183111	0.789087	0.00673842	0.0053172	0.00517818	0.949803	0.615559	2.3056	1.39606
1587	0	29071.7	9277.05	0		0.184993	0.748942	0.00941551	0.00705167	0.00706781	0.922857	0.587014	2.02815	1.09108
1588	0	29081.7	9277.05	0		0.147203	0.58841	0.0100984	0.005942	0.00601299	0.914049	0.517642	2.09108	0.952344
1589	0	29091.7	9277.05	0		0.0317396	0.375515	0.0398234	0.0149543	0.0154138	0.897394	0.472647	2.59891	1.21261
1590	0	29101.7	9277.05	0		0.0322769	0.494911	0.022912	0.0113394	0.0134668	0.778848	0.553902	2.3778	1.2626
1591	0	29111.7	9277.05	0		0.0521032	0.415765	0.0287407	0.0119494	0.0125856	0.878212	0.582768	2.41791	1.31515
1592	0	29121.7	9277.05	0		0.0249847	0.461341	0.0227641	0.010502	0.0113041	0.859336	0.559297	2.51146	1.19631
1593	0	29131.7	9277.05	0		0.0301904	0.482876	0.0198676	0.00959357	0.0104259	0.851122	0.512786	3.13845	1.0455
1594	0	29141.7	9277.05	0		0.037535	0.46902	0.0257145	0.0120606	0.0132873	0.839581	0.550952	2.62233	1.26318
1595	0	29151.7	9277.05	0		0.261091	0.576525	0.0173745	0.0100168	0.0107351	0.863081	0.575533	2.6972	1.0689
1596	0	29161.7	9277.05	0		0.0298922	0.39484	0.0231483	0.00913989	0.0140096	0.603451	0.584172	2.56592	0.967705
1597	0	29171.7	9277.05	0		0.033028	0.407992	0.0386313	0.0157613	0.0259753	0.561253	0.629945	2.29031	1.11495
1598	0	29181.7	9277.05	0		0.0230579	0.644618	0.168714	0.108756	0.0156843	0.655778	0.665356	2.7459	1.0831
1599	0	29191.7	9277.05	0		0.02083	0.558401	0.0156661	0.00874799	0.0110338	0.733346	0.712009	2.67921	0.930893
1600	0	29201.7	9277.05	0		0.0200153	0.566129	0.0168191	0.00952176	0.0117919	0.746899	0.758906	2.42357	0.769693
1601	0	29211.7	9277.05	0		0.209453	0.459555	0.189485	0.0870787	0.014513	0.583252	0.791409	2.207	0.927594
1602	0	29221.7	9277.05	0		0.0226377	0.557115	0.0163349	0.00910041	0.0104709	0.803906	0.853239	3.04477	0.776338
1603	0	29231.7	9277.05	0		0.0204252	0.825429	0.0169553	0.0139954	0.0228336	0.566942	0.908915	2.37024	0.79303
1604	0	29241.7	9277.05	0		0.0181862	0.507404	0.0182508	0.00926052	0.0138036	0.620541	0.929307	2.12948	0.741284
1605	0	29251.7	9277.05	0		0.0283241	0.420188	0.019604	0.00823736	0.0101332	0.751916	0.819706	2.4989	0.851315
1606	0	29261.7	9277.05	0		0.373642	0.599087	0.0212011	0.0127013	0.0189185	0.620997	1.13268	2.13172	0.804549
1607	0	29271.7	9277.05	0		0.029394	0.500802	0.0303244	0.0151865	0.028914	0.485823	1.3016	2.17391	0.771717
1608	0	29281.7	9277.05	0		0.0332255	0.342562	0.0311882	0.0106839	0.0182508	0.54147	1.03029	2.48022	0.718263
1609	0	29291.7	9277.05	0		0.0426649	0.575591	0.0257356	0.0148132	0.0259056	0.52891	1.08961	2.38973	0.680715
1610	0	29301.7	9277.05	0		0.0257351	0.570124	0.231018	0.131709	0.0307104	0.377686	0.885433	2.63959	0.717863
1611	0	29311.7	9277.05	0		0.0255901	0.457722	0.0234587	0.0107376	0.0225054	0.441314	0.869146	2.49756	0.884683
1612	0	27871.7	9267.05	0		0.22732	1.46855	0.143867	0.211275	0.00837262	0.852565	0.844439	1.70846	1.11492
1613	0	27881.7	9267.05	0		0.182181	1.26482	0.126337	0.159793	0.00737902	0.838776	0.762606	2.46381	1.27188
1614	0	27891.7	9267.05	0		0.236353	0.869215	0.104467	0.0908043	0.00707382	0.77868	1.0295	2.23767	1.03275
1615	0	27901.7	9267.05	0		0.0115531	1.06786	0.00796968	0.00851052	0.00925237	0.850806	0.942336	2.36582	1.05534
1616	0	27911.7	9267.05	0		0.0129191	1.08331	0.00947857	0.0102682	0.0107282	0.88531	0.788359	2.98448	0.917658
1617	0	27921.7	9267.05	0		0.184492	0.858936	0.00867391	0.00745034	0.0105739	0.65173	0.913004	2.45033	0.718575
1618	0	27931.7	9267.05	0		0.212416	0.96376	0.0101516	0.0097837	0.0111429	0.812145	0.72229	2.58366	1.03724
1619	0	27941.7	9267.05	0		0.101898	0.841961	0.00910255	0.00766399	0.00724593	0.978336	0.904517	2.51067	0.743421
1620	0	27951.7	9267.05	0		0.0275462	0.437954	0.0280536	0.0122862	0.0125028	0.908942	0.881449	2.29499	0.744695
1621	0	27961.7	9267.05	0		0.0364658	0.591567	0.021415	0.0126684	0.0129757	0.903062	0.972482	1.6838	0.709492
1622	0	27971.7	9267.05	0		0.0527827	0.424053	0.047078	0.0199636	0.0303848	0.607728	0.931874	2.06329	0.99427
1623	0	27981.7	9267.05	0		0.0481561	0.344904	0.0543699	0.0187524	0.0304517	0.569603	1.02241	2.07838	0.849255
1624	0	27991.7	9267.05	0		0.0725518	0.413341	0.0508581	0.0210217	0.0259674	0.748802	1.00961	1.84709	0.9527
1625	0	28001.7	9267.05	0		0.20652	0.512057	0.102458	0.0524643	0.00668827	0.781808	0.818032	1.85578	0.735583
1626	0	28011.7	9267.05	0		0.122888	0.556595	0.0116244	0.00647007	0.00629667	0.950442	0.8079	1.50528	1.06243
1627	0	28021.7	9267.05	0		0.0252348	0.428225	0.194284	0.0831972	0.0110503	0.817557	0.696574	2.13094	1.15131
1628	0	28031.7	9267.05	0		0.21357	0.698031	0.117761	0.0822008	0.00667374	1.24031	0.645295	2.70402	0.862898
1629	0	28041.7	9267.05	0		0.163555	0.740814	0.0934862	0.0692559	0.0623208	1.11366	0.612227	1.79577	0.948262
1630	0	28051.7	9267.05	0		0.0210904	0.443296	0.0263508	0.0116812	0.0094408	1.14447	0.587821	2.03774	1.29164
1631	0	28061.7	9267.05	0		0.174365	0.356294	0.0252077	0.00898134	0.00773897	1.07346	0.576549	1.76493	1.12698
1632	0	28071.7	9267.05	0		0.181196	0.429927	0.0147924	0.00635965	0.00771043	0.762926	0.580223	2.31296	1.27218
1633	0	28081.7	9267.05	0		0.161943	0.493767	0.101599	0.0501662	0.00511338	0.897975	0.559447	2.02201	1.1
1634	0	28091.7	9267.05	0		0.0189562	0.331855	0.025323	0.00840356	0.00802755	0.968296	0.563416	1.84314	1.22616
1635	0	28101.7	9267.05	0		0.0274713	0.208589	0.062407	0.0130174	0.0162902	0.739138	0.617436	2.06114	1.34486
1636	0	28111.7	9267.05	0		0.243337	0.484466	0.0169805	0.00822647	0.0066852	1.13822	0.486046	2.49675	1.41831
1637	0	28121.7	9267.05	0		0.0348151	0.284888	0.0424003	0.0120794	0.0140254	0.796627	0.4858	1.99424	1.18717
1638	0	28131.7	9267.05	0		0.0610487	0.316743	0.0498046	0.0157753	0.0151819	0.961121	0.46944	2.04996	1.44304
1639	0	28141.7	9267.05	0		0.161773	0.246805	0.0293506	0.00724388	0.0080036	0.837169	0.417358	2.68135	1.42855
1640	0	28151.7	9267.05	0		0.233402	0.302426	0.0247525	0.00748579	0.00764374	0.905857	0.471435	2.62943	1.16666
1641	0	28161.7	9267.05	0		0.0201211	0.316865	0.0221681	0.0070243	0.00741236	0.876545	0.3696	2.64562	1.20858
1642	0	28171.7	9267.05	0		0.15459	0.344979	0.024878	0.00858241	0.00826653	0.960315	0.421219	2.08837	1.38436
1643	0	28181.7	9267.05	0		0.165261	0.607718	0.0969616	0.0589254	0.00550777	1.0069	0.365532	2.21813	1.22735
1644	0	28191.7	9267.05	0		0.112646	0.461503	0.0152713	0.00704777	0.00659888	0.987891	0.482152	2.08415	1.20964
1645	0	28201.7	9267.05	0		0.0239331	0.317271	0.035082	0.0111305	0.00989458	1.04051	0.359986	2.36231	1.21263
1646	0	28211.7	9267.05	0		0.0428322	0.252567	0.0645428	0.0163014	0.0150401	1.00254	0.363074	2.91545	1.35945
1647	0	28221.7	9267.05	0		0.036803	0.248953	0.0463895	0.0115488	0.0107659	0.992236	0.398299	2.50155	1.36304
1648	0	28231.7	9267.05	0		0.0249956	0.366531	0.0300176	0.0110024	0.00958534	1.06171	0.365535	2.59208	1.33026
1649	0	28241.7	9267.05	0		0.0164166	0.423279	0.0225799	0.00955762	0.006099	1.4495	0.391689	2.37875	1.58692
1650	0	28251.7	9267.05	0		0.186183	0.565082	0.0135525	0.00765826	0.00536983	1.31916	0.428883	1.94753	1.35992
1651	0	28261.7	9267.05	0		0.0204592	0.364633	0.0273954	0.00998926	0.00838096	1.10247	0.526322	1.69183	1.27803
1652	0	28271.7	9267.05	0		0.198132	0.641859	0.0891243	0.0572052	0.0059483	1.06154	0.51356	2.06353	1.38315
1653	0	28281.7	9267.05	0		0.157677	0.664127	0.012984	0.00862302	0.00679592	1.17365	0.475412	2.02969	1.40173
1654	0	28291.7	9267.05	0		0.154991	0.578141	0.0132996	0.00768906	0.00682573	1.04196	0.5408	2.47885	1.52407
1655	0	28301.7	9267.05	0		0.192689	0.456969	0.165191	0.0754869	0.0535014	1.12548	0.375876	2.19078	1.25907
1656	0	28311.7	9267.05	0		0.239192	0.489879	0.0114441	0.00560621	0.00347474	1.49236	0.496644	1.93964	1.494
1657	0	28321.7	9267.05	0		0.013031	0.637041	0.0108071	0.0068846	0.0571533	1.66755	0.484355	1.71915	1.24402
1658	0	28331.7	9267.05	0		0.170526	0.558379	0.101852	0.0568722	0.0414716	1.37988	0.519596	1.97483	1.03088
1659	0	28341.7	9267.05	0		0.164077	0.604302	0.112382	0.0679127	0.0504486	1.1582	0.537966	2.22063	1.24363
1660	0	28351.7	9267.05	0		0.181487	0.527051	0.0814335	0.0429196	0.00480913	0.915188	0.519876	2.45307	1.21481
1661	0	28361.7	9267.05	0		0.165482	0.475711	0.0111594	0.00530867	0.00507284	0.967972	0.437215	2.48212	0.992386
1662	0	28371.7	9267.05	0		0.197718	0.611883	0.00854465	0.00522832	0.0055016	0.879025	0.530558	2.2853	1.26071
1663	0	28381.7	9267.05	0		0.189216	0.480166	0.0111733	0.00536503	0.0479775	1.03569	0.674981	1.96055	1.14686
1664	0	28391.7	9267.05	0		0.216536	0.416441	0.0132289	0.00550905	0.00513368	0.992603	0.500316	1.7868	1.50663
1665	0	28401.7	9267.05	0		0.173438	0.371143	0.0155335	0.00576516	0.00589946	0.903913	0.50747	2.21911	1.08899
1666	0	28411.7	9267.05	0		0.216512	0.420928	0.0116694	0.00491196	0.00420137	1.08141	0.51312	2.21948	1.05025
1667	0	28421.7	9267.05	0		0.121661	0.435464	0.0120618	0.00525245	0.00545023	0.891404	0.452962	2.75912	0.999923
1668	0	28431.7	9267.05	0		0.159388	0.441882	0.0131286	0.00580127	0.0046609	1.15128	0.57435	2.29961	1.16365
1669	0	28441.7	9267.05	0		0.130957	0.456977	0.0128436	0.00586924	0.00393906	1.37822	0.59211	1.72375	1.1427
1670	0	28451.7	9267.05	0		0.0144028	0.367701	0.0244845	0.00900298	0.00555605	1.49881	0.57182	1.86687	1.09633
1671	0	28461.7	9267.05	0		0.216915	0.291479	0.0244021	0.00711272	0.00552568	1.19063	0.580881	1.81595	1.02631
1672	0	28471.7	9267.05	0		0.144647	0.414952	0.0156563	0.00649662	0.00523435	1.14803	0.691705	1.81977	1.12228
1673	0	28481.7	9267.05	0		0.198233	0.318068	0.0227293	0.00722945	0.0735037	1.23922	0.539112	2.05604	0.988984
1674	0	28491.7	9267.05	0		0.0307676	0.212496	0.0437655	0.00929997	0.0064513	1.3334	0.536272	1.85682	1.06447
1675	0	28501.7	9267.05	0		0.0388597	0.31728	0.0281651	0.00893622	0.00609906	1.35525	0.52939	2.06957	0.995612
1676	0	28511.7	9267.05	0		0.337918	0.290322	0.0300902	0.00873587	0.00516183	1.56542	0.51997	2.02917	0.990248
1677	0	28521.7	9267.05	0		0.136514	0.331114	0.138184	0.0457546	0.072772	1.17535	0.517902	2.14156	1.11861
1678	0	28531.7	9267.05	0		0.125412	0.409196	0.0108897	0.00445603	0.0597838	0.970377	0.63785	1.99002	1.20482
1679	0	28541.7	9267.05	0		0.183285	0.467952	0.119249	0.0558027	0.0620396	0.932176	0.500556	1.96561	1.16496
1680	0	28551.7	9267.05	0		0.185026	0.520134	0.00949494	0.00493864	0.0629496	1.00011	0.469473	1.98138	1.08087
1681	0	28561.7	9267.05	0		0.168967	0.457906	0.0097299	0.00445538	0.0630742	0.807594	0.594644	1.99594	1.04744
1682	0	28571.7	9267.05	0		0.161325	0.577982	0.0849166	0.0490803	0.00372427	1.05066	0.57432	1.93919	1.1764
1683	0	28581.7	9267.05	0		0.108178	0.550191	0.0906981	0.0499013	0.0567404	1.05568	0.558294	1.76055	0.972761
1684	0	28591.7	9267.05	0		0.148404	0.543097	0.0081394	0.00442048	0.0697287	1.10029	0.458576	2.32085	0.996069
1685	0	28601.7	9267.05	0		0.195631	0.512742	0.00931629	0.00477686	0.0695763	1.19221	0.521601	2.59489	1.19074
1686	0	28611.7	9267.05	0		0.182824	0.377791	0.0205624	0.00776829	0.0074111	0.96955	0.474444	2.45878	1.09365
1687	0	28621.7	9267.05	0		0.168984	0.331208	0.01401	0.00464021	0.0496334	0.97513	0.415199	2.35866	1.30408
1688	0	28631.7	9267.05	0		0.163183	0.486383	0.111995	0.0544725	0.054884	1.06591	0.584576	2.27693	1.16928
1689	0	28641.7	9267.05	0		0.228782	0.488197	0.00864445	0.00422019	0.0655034	1.11286	0.461685	2.32011	1.15646
1690	0	28651.7	9267.05	0		0.0214468	0.417818	0.0209017	0.00873311	0.00744415	1.08513	0.46423	1.98272	1.19067
1691	0	28661.7	9267.05	0		0.221763	0.51161	0.170137	0.0870438	0.0071269	1.25008	0.477624	2.10916	1.45285
1692	0	28671.7	9267.05	0		0.151793	0.347489	0.0235718	0.00819094	0.00630276	1.20207	0.404004	2.5591	1.3389
1693	0	28681.7	9267.05	0		0.197523	0.47349	0.00978611	0.00463363	0.0723688	1.37898	0.378071	2.61518	1.14973
1694	0	28691.7	9267.05	0		0.0142158	0.480257	0.0157056	0.00754272	0.00545315	1.2794	0.473604	2.02883	1.25971
1695	0	28701.7	9267.05	0		0.0160387	0.288686	0.0201261	0.00581013	0.00390075	1.37773	0.476631	2.02828	1.14439
1696	0	28711.7	9267.05	0		0.135895	0.396272	0.0117614	0.00466073	0.00393578	1.09534	0.469439	2.26512	1.25166
1697	0	28721.7	9267.05	0		0.0238064	0.267826	0.0370654	0.00992709	0.00978776	0.938136	0.443251	2.66728	1.2718
1698	0	28731.7	9267.05	0		0.0169755	0.262043	0.0258882	0.00678382	0.00514438	1.21975	0.539888	1.84649	1.13175
1699	0	28741.7	9267.05	0		0.234442	0.29294	0.0305453	0.00894792	0.00759787	1.08933	0.532295	1.96326	1.22536
1700	0	28751.7	9267.05	0		0.0498852	0.168074	0.0757767	0.0127361	0.0121137	0.97249	0.474346	2.31786	1.20767
1701	0	28761.7	9267.05	0		0.164539	0.321703	0.0183336	0.00589797	0.0644086	1.13848	0.448046	2.34072	1.19321
1702	0	28771.7	9267.05	0		0.0163526	0.433936	0.0168197	0.00729867	0.00615115	1.09753	0.43677	2.47315	0.978548
1703	0	28781.7	9267.05	0		0.233677	0.280528	0.0303249	0.00850698	0.00774343	1.01618	0.43164	2.37079	1.34886
1704	0	28791.7	9267.05	0		0.175249	0.314501	0.0195196	0.00613893	0.00378681	1.4995	0.426963	2.51218	1.2419
1705	0	28801.7	9267.05	0		0.178143	0.33947	0.0155779	0.00528822	0.00396303	1.23427	0.456183	2.10077	1.29829
1706	0	28811.7	9267.05	0		0.0128784	0.483366	0.0159282	0.00769917	0.0077772	0.915689	0.498403	3.11638	1.38811
1707	0	28821.7	9267.05	0		0.104959	0.521672	0.0130326	0.00679873	0.00840489	0.748209	0.519175	2.36156	1.17517
1708	0	28831.7	9267.05	0		0.162922	0.524344	0.0127625	0.00669196	0.00792147	0.781403	0.602905	1.86801	1.62596
1709	0	28841.7	9267.05	0		0.172382	0.340884	0.0243476	0.0082997	0.00869231	0.883191	0.451176	2.1429	1.33346
1710	0	28851.7	9267.05	0		0.172275	0.435482	0.0136711	0.00595351	0.00778288	0.707555	0.468416	2.32746	1.45168
1711	0	28861.7	9267.05	0		0.141326	0.415977	0.0141027	0.00586639	0.00674848	0.804067	0.585449	2.03314	1.23642
1712	0	28871.7	9267.05	0		0.190114	0.287021	0.0308283	0.00884836	0.0108981	0.750998	0.458123	1.70228	1.17513
1713	0	28881.7	9267.05	0		0.251567	0.311071	0.0336894	0.0104798	0.00993325	0.975864	0.457155	2.08309	1.34187
1714	0	28891.7	9267.05	0		0.195001	0.262845	0.0325261	0.00854931	0.00995153	0.794637	0.469048	2.05062	1.40833
1715	0	28901.7	9267.05	0		0.015267	0.362425	0.0199834	0.00724248	0.00615411	1.08855	0.399517	2.4602	1.42624
1716	0	28911.7	9267.05	0		0.152554	0.393484	0.0148701	0.00585114	0.0049127	1.10166	0.529533	2.62733	1.29283
1717	0	28921.7	9267.05	0		0.0211425	0.477637	0.0192466	0.0091929	0.00875082	0.971699	0.479034	2.24883	1.20244
1718	0	28931.7	9267.05	0		0.0293281	0.391281	0.0333807	0.0130612	0.0161895	0.746237	0.470593	2.45076	1.39676
1719	0	28941.7	9267.05	0		0.0660146	0.257551	0.0710115	0.0182891	0.0235333	0.718848	0.438552	2.88766	1.39816
1720	0	28951.7	9267.05	0		0.0247272	0.35087	0.0347114	0.0121792	0.0129768	0.868119	0.479634	3.13707	1.42834
1721	0	28961.7	9267.05	0		0.0277387	0.330588	0.0310125	0.0102523	0.0122985	0.771076	0.487449	2.31035	1.27774
1722	0	28971.7	9267.05	0		0.136876	0.408879	0.0127478	0.00521231	0.00659379	0.731177	0.493279	1.96395	1.26342
1723	0	28981.7	9267.05	0		0.210175	0.511898	0.0102124	0.00522773	0.00745123	0.648952	0.493823	2.71697	1.30326
1724	0	28991.7	9267.05	0		0.176949	0.643548	0.0112352	0.00723036	0.00851938	0.785017	0.477644	2.46577	1.35709
1725	0	29001.7	9267.05	0		0.014224	0.440099	0.014934	0.00657246	0.0064876	0.937069	0.545475	2.53423	1.25667
1726	0	29011.7	9267.05	0		0.0265071	0.414689	0.0282047	0.0116962	0.00985571	1.0977	0.531131	2.5324	1.44333
1727	0	29021.7	9267.05	0		0.0287587	0.285297	0.0379389	0.0108239	0.0158283	0.632522	0.473207	2.45035	1.37965
1728	0	29031.7	9267.05	0		0.0391163	0.291961	0.0442917	0.0129314	0.0215029	0.556261	0.479487	2.40021	1.54535
1729	0	29041.7	9267.05	0		0.0284969	0.356286	0.0305698	0.0108916	0.0138779	0.725929	0.561463	2.0267	1.35607
1730	0	29051.7	9267.05	0		0.123495	0.612683	0.0106457	0.00652244	0.00671807	0.898034	0.544959	1.9351	1.26657
1731	0	29061.7	9267.05	0		0.143118	0.759464	0.100074	0.0760028	0.00566808	0.820512	0.567375	2.34818	1.22534
1732	0	29071.7	9267.05	0		0.171872	0.712349	0.0120492	0.00858323	0.0126655	0.62684	0.470987	2.40469	1.44726
1733	0	29081.7	9267.05	0		0.302878	0.493616	0.0226103	0.0111608	0.012381	0.833814	0.512993	1.79439	1.29796
1734	0	29091.7	9267.05	0		0.0556299	0.333874	0.0495815	0.016554	0.0177441	0.862933	0.524301	2.13147	1.24651
1735	0	29101.7	9267.05	0		0.0396959	0.342739	0.0402035	0.0137793	0.0170339	0.748241	0.523642	2.56049	1.31946
1736	0	29111.7	9267.05	0		0.04279	0.407963	0.0244259	0.00996487	0.00968411	0.951786	0.562416	2.51621	1.38135
1737	0	29121.7	9267.05	0		0.0257013	0.457559	0.0185583	0.00849152	0.00724456	1.08418	0.555821	2.51677	1.25138
1738	0	29131.7	9267.05	0		0.0385586	0.45864	0.024974	0.0114541	0.0130311	0.813033	0.509207	2.47228	1.3104
1739	0	29141.7	9267.05	0		0.0350554	0.381425	0.242309	0.0924225	0.0109737	0.922233	0.550138	2.79618	1.31706
1740	0	29151.7	9267.05	0		0.0245822	0.435326	0.0183448	0.00798598	0.00753329	0.980553	0.663836	2.27823	1.27564
1741	0	29161.7	9267.05	0		0.0245034	0.538362	0.0194941	0.0104949	0.0104057	0.932898	0.590129	2.32933	1.07028
1742	0	29171.7	9267.05	0		0.0260737	0.516009	0.027876	0.0143843	0.0194221	0.685044	0.549297	2.729	1.16334
1743	0	29181.7	9267.05	0		0.0254344	0.666058	0.0158725	0.010572	0.0122446	0.79862	0.580735	2.84102	1.03519
1744	0	29191.7	9267.05	0		0.0218841	0.707737	0.228133	0.161458	0.0122378	0.816459	0.602878	2.37982	0.930724
1745	0	29201.7	9267.05	0		0.0314065	0.5701	0.0251866	0.0143589	0.0210618	0.630598	0.646539	2.1556	0.875521
1746	0	29211.7	9267.05	0		0.0234189	0.455546	0.0209832	0.00955883	0.0117752	0.75087	0.808188	2.08765	1.02087
1747	0	29221.7	9267.05	0		0.0169402	0.447224	0.0147821	0.00661092	0.0066716	0.916556	0.703058	2.16734	0.819343
1748	0	29231.7	9267.05	0		0.0170004	0.508457	0.0118663	0.00603349	0.0072462	0.770169	0.697748	2.31656	0.84576
1749	0	29241.7	9267.05	0		0.0211142	0.576065	0.0165353	0.0095254	0.0121984	0.722284	0.905924	2.39204	0.764872
1750	0	29251.7	9267.05	0		0.026713	0.571374	0.0162025	0.00925772	0.0142079	0.602699	0.981509	2.12364	0.777802
1751	0	29261.7	9267.05	0		0.235174	0.513716	0.0196421	0.0100905	0.011998	0.777912	0.935189	2.13409	0.739334
1752	0	29271.7	9267.05	0		0.03054	0.340837	0.0310739	0.0105911	0.0151785	0.645416	0.99417	2.70392	0.796102
1753	0	29281.7	9267.05	0		0.0391264	0.661192	0.0218794	0.0144665	0.018705	0.715371	1.06767	2.24163	0.730608
1754	0	29291.7	9267.05	0		0.0326855	0.520593	0.0279999	0.0145765	0.0215016	0.627062	1.09814	2.45662	0.755933
1755	0	29301.7	9267.05	0		0.149761	0.385392	0.0148097	0.00570754	0.00846893	0.623372	0.898876	2.47474	0.656565
1756	0	29311.7	9267.05	0		0.0131735	0.428998	0.0106785	0.00458105	0.00640527	0.661539	0.972317	2.30803	0.678873
1757	0	29321.7	9267.05	0		0.195748	0.630776	0.0090691	0.00572057	0.00685878	0.771471	0.83055	2.34062	0.952013
1758	0	29331.7	9267.05	0		0.0155603	0.495347	0.188056	0.0931531	0.0112152	0.637481	0.903502	2.1963	0.520465
1759	0	27851.7	9257.05	0		0.179625	0.920635	0.107731	0.0991812	0.00667161	0.708914	0.841347	3.44117	0.951065
1760	0	27861.7	9257.05	0		0.202239	1.16744	0.0925724	0.108073	0.0071037	0.815579	0.86837	2.10867	0.938838
1761	0	27871.7	9257.05	0		0.196229	0.999747	0.0888532	0.0888308	0.00683532	0.808757	1.10136	2.5599	0.770555
1762	0	27881.7	9257.05	0		0.186727	1.07402	0.114749	0.123243	0.00847204	0.759288	0.95494	2.33465	0.783126
1763	0	27891.7	9257.05	0		0.176188	1.20759	0.125352	0.151373	0.010277	0.746851	0.884279	2.5282	0.710068
1764	0	27901.7	9257.05	0		0.160437	1.04975	0.0953929	0.100139	0.0092448	0.763718	0.745702	3.58957	0.668219
1765	0	27911.7	9257.05	0		0.015194	0.897226	0.0148837	0.013354	0.0130169	0.948927	0.674321	28.7428	0.645772
1766	0	27921.7	9257.05	0		0.250461	1.19463	0.126209	0.150772	0.0105271	0.936468	0.801574	1.84369	0.733791
1767	0	27931.7	9257.05	0		0.0132945	0.908305	0.174313	0.158329	0.00955059	0.910285	0.833785	2.00619	0.619685
1768	0	27941.7	9257.05	0		0.0324189	0.428957	0.0328526	0.0140924	0.0145989	0.892878	0.891204	1.96365	0.806858
1769	0	27951.7	9257.05	0		0.0650276	0.207576	0.0987479	0.0204977	0.027014	0.701846	0.749816	2.38108	0.803279
1770	0	27961.7	9257.05	0		0.0873901	0.329905	0.0542303	0.0178908	0.0233873	0.707585	0.969097	1.98891	1.02615
1771	0	27971.7	9257.05	0		0.0382725	0.277811	0.0452903	0.0125821	0.0139014	0.837191	0.954944	2.65319	0.751936
1772	0	27981.7	9257.05	0		0.0408882	0.384384	0.0431408	0.0165826	0.0223345	0.686759	1.06507	2.01161	0.829639
1773	0	27991.7	9257.05	0		0.0342319	0.382554	0.0294766	0.0112764	0.0130154	0.801384	0.813278	2.03778	0.902138
1774	0	28001.7	9257.05	0		0.18892	0.574019	0.00889558	0.00510623	0.00505093	0.935097	0.771914	2.16979	0.935394
1775	0	28011.7	9257.05	0		0.224021	0.70863	0.00734096	0.00520203	0.0053214	0.904221	0.723546	2.48555	1.04595
1776	0	28021.7	9257.05	0		0.0152303	0.582071	0.0131896	0.00767727	0.00772498	0.919257	0.751565	2.15612	1.21624
1777	0	28031.7	9257.05	0		0.213317	0.734423	0.00982881	0.00721851	0.112377	1.18708	0.504544	2.94283	1.55211
1778	0	28041.7	9257.05	0		0.161228	0.694047	0.0106934	0.00742174	0.00587648	1.1682	0.702198	3.14076	1.31466
1779	0	28051.7	9257.05	0		0.0293217	0.643554	0.0252479	0.0162484	0.00939414	1.59985	0.584133	2.08253	1.01469
1780	0	28061.7	9257.05	0		0.0658971	0.367477	0.050555	0.0185778	0.0185641	0.925651	0.60622	1.8215	1.23323
1781	0	28071.7	9257.05	0		0.233829	0.47877	0.0178439	0.00854312	0.00695833	1.13564	0.535626	1.97083	1.46088
1782	0	28081.7	9257.05	0		0.0166889	0.335383	0.0254043	0.00852018	0.00879337	0.896233	0.526486	1.78347	1.1413
1783	0	28091.7	9257.05	0		0.0261865	0.216503	0.0380388	0.00823551	0.00917209	0.830519	0.513329	2.1084	1.26414
1784	0	28101.7	9257.05	0		0.0333463	0.247538	0.0500933	0.0124	0.0157666	0.727464	0.476923	2.27849	1.2747
1785	0	28111.7	9257.05	0		0.0448542	0.187475	0.0954027	0.0178857	0.0200382	0.825608	0.557628	2.0281	1.48297
1786	0	28121.7	9257.05	0		0.0228062	0.361536	0.0265738	0.00960737	0.0103297	0.860291	0.458927	2.33636	1.32641
1787	0	28131.7	9257.05	0		0.0127253	0.42021	0.0156219	0.00656448	0.00737461	0.823359	0.415999	1.9983	1.22148
1788	0	28141.7	9257.05	0		0.0275775	0.295765	0.0325369	0.00962328	0.0111807	0.796127	0.422806	2.05653	1.44596
1789	0	28151.7	9257.05	0		0.163301	0.242042	0.0429687	0.0104002	0.0119111	0.80764	0.444172	2.03694	1.37472
1790	0	28161.7	9257.05	0		0.181451	0.276506	0.0304765	0.00842694	0.0107187	0.727202	0.403483	2.41287	1.34833
1791	0	28171.7	9257.05	0		0.181936	0.284176	0.0251484	0.00714658	0.00834034	0.792579	0.382933	2.55308	1.242
1792	0	28181.7	9257.05	0		0.124488	0.485248	0.0139081	0.00674886	0.0707378	1.01095	0.434551	1.86688	1.14198
1793	0	28191.7	9257.05	0		0.100819	0.369805	0.0230418	0.00852098	0.00797132	0.988751	0.42287	2.31677	1.23933
1794	0	28201.7	9257.05	0		0.0385506	0.194439	0.0648772	0.0126147	0.0111042	1.05079	0.388782	2.52396	1.42835
1795	0	28211.7	9257.05	0		0.068723	0.34936	0.0552032	0.0192858	0.0145784	1.22365	0.37595	2.60323	1.35787
1796	0	28221.7	9257.05	0		0.0387555	0.239866	0.0621388	0.014905	0.0101071	1.36405	0.355202	2.93078	1.42754
1797	0	28231.7	9257.05	0		0.0211546	0.340721	0.0218866	0.00745721	0.0064346	1.07197	0.383462	3.01664	1.44226
1798	0	28241.7	9257.05	0		0.0182892	0.308264	0.025844	0.00796678	0.00614274	1.19963	0.418868	2.42997	1.11953
1799	0	28251.7	9257.05	0		0.0296164	0.277098	0.0385928	0.010694	0.00882881	1.12038	0.415947	2.49788	1.22456
1800	0	28261.7	9257.05	0		0.0171875	0.403142	0.0200402	0.00807903	0.00549934	1.35886	0.494841	1.91379	1.42599
1801	0	28271.7	9257.05	0		0.0130136	0.483356	0.0182919	0.0088415	0.00778287	1.05078	0.493995	2.57524	1.57499
1802	0	28281.7	9257.05	0		0.188026	0.577809	0.0159368	0.00920845	0.00894717	0.951981	0.433907	1.82109	1.49338
1803	0	28291.7	9257.05	0		0.180065	0.530569	0.0147752	0.00783927	0.0824197	1.13477	0.611977	2.13891	1.75181
1804	0	28301.7	9257.05	0		0.216421	0.470147	0.122114	0.0574114	0.00443365	1.25058	0.533824	2.42085	1.15917
1805	0	28311.7	9257.05	0		0.261884	0.376196	0.0167442	0.00629908	0.0777705	1.2801	0.415047	2.38521	1.38547
1806	0	28321.7	9257.05	0		0.0259457	0.342167	0.0329403	0.0112711	0.00795227	1.311	0.554534	1.72126	1.13493
1807	0	28331.7	9257.05	0		0.0211408	0.445504	0.166668	0.0742511	0.00541855	1.1854	0.511469	1.93346	1.14111
1808	0	28341.7	9257.05	0		0.176942	0.539833	0.00703869	0.00379971	0.0538276	1.49531	0.523638	2.43143	1.05939
1809	0	28351.7	9257.05	0		0.143923	0.594305	0.0811631	0.0482356	0.0754838	1.10242	0.517992	2.88996	1.08094
1810	0	28361.7	9257.05	0		0.203459	0.702967	0.13846	0.0973329	0.0561249	1.27166	0.571051	2.07018	1.13189
1811	0	28371.7	9257.05	0		0.164278	0.75422	0.105766	0.0797704	0.0540225	1.37553	0.58541	1.90046	1.17608
1812	0	28381.7	9257.05	0		0.192477	0.542299	0.0814949	0.0441946	0.0377484	1.569	0.577517	2.12534	1.19528
1813	0	28391.7	9257.05	0		0.172463	0.478393	0.00883854	0.00422829	0.038545	1.47373	0.630602	2.20981	1.08801
1814	0	28401.7	9257.05	0		0.170445	0.384604	0.0114511	0.00440416	0.038722	1.30475	0.602255	1.90376	1.16955
1815	0	28411.7	9257.05	0		0.164759	0.357468	0.0133041	0.00475579	0.0538023	1.36901	0.582189	1.86354	1.11103
1816	0	28421.7	9257.05	0		0.204003	0.513869	0.00958606	0.00492598	0.00382999	1.18966	0.576417	2.01587	1.06084
1817	0	28431.7	9257.05	0		0.170521	0.593763	0.0859485	0.051033	0.0513607	1.16636	0.617227	2.09863	0.984857
1818	0	28441.7	9257.05	0		0.164712	0.5738	0.008433	0.00483886	0.0610115	1.30505	0.670452	1.74246	1.08087
1819	0	28451.7	9257.05	0		0.140995	0.493774	0.144546	0.071373	0.0476298	1.5215	0.608577	2.35417	1.13005
1820	0	28461.7	9257.05	0		0.150076	0.425235	0.127468	0.0542037	0.055227	1.4322	0.68391	2.10269	1.04919
1821	0	28471.7	9257.05	0		0.120115	0.413909	0.150252	0.0621907	0.0570176	1.32123	0.632034	2.03991	1.01496
1822	0	28481.7	9257.05	0		0.13142	0.447065	0.107576	0.0480937	0.0481388	1.26506	0.491253	2.24285	0.991991
1823	0	28491.7	9257.05	0		0.147848	0.325757	0.0224734	0.00732088	0.0553019	1.28285	0.520283	1.91876	0.892754
1824	0	28501.7	9257.05	0		0.0330181	0.261966	0.0325894	0.0085373	0.043979	1.35869	0.506243	2.51717	1.03636
1825	0	28511.7	9257.05	0		0.0347796	0.332697	0.0251116	0.00835454	0.0545097	1.48895	0.577177	2.09699	0.854471
1826	0	28521.7	9257.05	0		0.0357878	0.293895	0.245577	0.0721739	0.0633411	1.13608	0.572854	1.91928	0.940583
1827	0	28531.7	9257.05	0		0.125736	0.332417	0.0189818	0.00630989	0.0512342	0.991086	0.588801	1.92924	1.09152
1828	0	28541.7	9257.05	0		0.152622	0.373496	0.091337	0.034114	0.0505393	1.03188	0.507604	2.1277	0.878681
1829	0	28551.7	9257.05	0		0.176766	0.567566	0.144526	0.0820278	0.0504045	1.09035	0.518214	2.49307	0.99518
1830	0	28561.7	9257.05	0		0.164111	0.6109	0.00654674	0.0039994	0.0677256	1.04567	0.529162	1.98447	0.968364
1831	0	28571.7	9257.05	0		0.0083012	0.702741	0.0065257	0.00458587	0.00348007	1.21888	0.572667	1.78678	1.19356
1832	0	28581.7	9257.05	0		0.173277	0.585251	0.00822161	0.0048117	0.0678917	1.26943	0.584639	1.74935	1.20656
1833	0	28591.7	9257.05	0		0.10596	0.586834	0.0975269	0.0572321	0.0863766	1.47658	0.491924	1.78063	0.886333
1834	0	28601.7	9257.05	0		0.0115342	0.43086	0.00904075	0.00389529	0.0718698	1.36695	0.525971	2.91161	0.788992
1835	0	28611.7	9257.05	0		0.0188492	0.297438	0.0218581	0.00650143	0.00479125	1.25513	0.496563	2.23894	0.994414
1836	0	28621.7	9257.05	0		0.0161563	0.336338	0.0161384	0.00542795	0.0746769	1.5199	0.538535	2.22937	1.02696
1837	0	28631.7	9257.05	0		0.0158967	0.414894	0.0125028	0.00518735	0.0619052	1.50828	0.533279	2.32981	1.15363
1838	0	28641.7	9257.05	0		0.0147889	0.458561	0.0113264	0.00519383	0.049054	1.33637	0.446939	2.1841	1.03302
1839	0	28651.7	9257.05	0		0.0300491	0.405292	0.023567	0.00955151	0.00735439	1.2013	0.442268	2.27613	1.17149
1840	0	28661.7	9257.05	0		0.0194741	0.390598	0.0153728	0.00600459	0.0038209	1.4536	0.458257	2.13902	1.18997
1841	0	28671.7	9257.05	0		0.0225715	0.329025	0.0216645	0.00712815	0.00508893	1.29562	0.534526	2.02395	1.04475
1842	0	28681.7	9257.05	0		0.0142821	0.423081	0.0145387	0.00615103	0.0754387	1.25941	0.479667	2.16819	1.05485
1843	0	28691.7	9257.05	0		0.0253202	0.385329	0.025887	0.00997503	0.00789262	1.16902	0.488032	2.27389	1.1674
1844	0	28701.7	9257.05	0		0.215268	0.460591	0.0155246	0.00715051	0.0558371	1.48192	0.468053	2.4209	1.21328
1845	0	28711.7	9257.05	0		0.107992	0.510172	0.00874389	0.00446089	0.0458147	1.63792	0.513961	1.8372	1.05552
1846	0	28721.7	9257.05	0		0.0193285	0.332893	0.022136	0.00736892	0.0861715	1.16262	0.556514	2.37129	1.33433
1847	0	28731.7	9257.05	0		0.114814	0.296107	0.0190264	0.00563387	0.0409054	1.40937	0.507367	2.06944	1.1219
1848	0	28741.7	9257.05	0		0.0209461	0.26096	0.0296472	0.00773673	0.00528282	1.35463	0.455904	2.34136	1.03694
1849	0	28751.7	9257.05	0		0.218897	0.214305	0.0312218	0.006691	0.00608277	1.01746	0.431915	2.17001	1.12701
1850	0	28761.7	9257.05	0		0.180592	0.227873	0.0247439	0.00563846	0.00505449	1.03184	0.46086	2.0346	1.1808
1851	0	28771.7	9257.05	0		0.272595	0.258298	0.0507116	0.0130987	0.0112097	1.08084	0.459353	2.1718	1.30531
1852	0	28781.7	9257.05	0		0.0422188	0.230293	0.0559562	0.0128863	0.0101778	1.17112	0.410551	2.31369	1.37491
1853	0	28791.7	9257.05	0		0.0343384	0.23968	0.0360634	0.00864365	0.00605342	1.32076	0.461637	2.1179	1.26407
1854	0	28801.7	9257.05	0		0.208977	0.330532	0.0330128	0.0109118	0.00748638	1.34819	0.411321	2.25574	1.25602
1855	0	28811.7	9257.05	0		0.187023	0.265021	0.303168	0.0803459	0.00500276	1.23632	0.463702	2.092	1.25878
1856	0	28821.7	9257.05	0		0.00990746	0.364156	0.0154853	0.00563908	0.00512421	1.01791	0.41551	2.54689	1.40485
1857	0	28831.7	9257.05	0		0.0144473	0.376221	0.0172925	0.00650579	0.00629884	0.95536	0.594062	2.17283	1.32059
1858	0	28841.7	9257.05	0		0.18955	0.223463	0.0391041	0.0087383	0.00877694	0.920897	0.499541	1.78527	1.3738
1859	0	28851.7	9257.05	0		0.219566	0.237393	0.0286297	0.00679649	0.00636926	0.987014	0.501913	1.93344	1.23136
1860	0	28861.7	9257.05	0		0.234443	0.29986	0.0164097	0.00492062	0.00459442	0.990644	0.459075	1.91777	1.30741
1861	0	28871.7	9257.05	0		0.0144676	0.390541	0.0147932	0.00577736	0.0540738	1.00306	0.499435	2.14527	1.22952
1862	0	28881.7	9257.05	0		0.283518	0.35929	0.0368665	0.0132458	0.0115959	1.05657	0.467473	2.41789	1.32131
1863	0	28891.7	9257.05	0		0.0486294	0.378975	0.0453128	0.0171724	0.0156284	1.01635	0.424126	2.47029	1.45769
1864	0	28901.7	9257.05	0		0.0381667	0.264668	0.0487391	0.0128997	0.0146463	0.814666	0.440819	2.51664	1.32953
1865	0	28911.7	9257.05	0		0.214941	0.326047	0.0256861	0.00837488	0.00802381	0.96544	0.467446	2.45274	1.4269
1866	0	28921.7	9257.05	0		0.164691	0.54512	0.0106572	0.00580947	0.00523453	1.02656	0.530537	2.5653	1.1226
1867	0	28931.7	9257.05	0		0.0316659	0.32369	0.0318489	0.0103092	0.0116359	0.819505	0.554101	2.79649	1.41842
1868	0	28941.7	9257.05	0		0.0498497	0.37322	0.0495908	0.0185083	0.0183523	0.93283	0.514889	2.52605	1.44849
1869	0	28951.7	9257.05	0		0.029781	0.374404	0.0328643	0.0123046	0.0113481	1.00293	0.429552	2.63813	1.31585
1870	0	28961.7	9257.05	0		0.233197	0.298125	0.0500994	0.0149359	0.0318072	0.434343	0.501747	2.39338	1.38602
1871	0	28971.7	9257.05	0		0.173403	0.351027	0.0226472	0.00794978	0.00956641	0.768659	0.460149	2.20921	1.40241
1872	0	28981.7	9257.05	0		0.259111	0.368406	0.023371	0.00861004	0.0107881	0.738222	0.498907	2.05071	1.37598
1873	0	28991.7	9257.05	0		0.194084	0.375333	0.0197009	0.00739439	0.00795009	0.860316	0.538621	2.17147	1.32981
1874	0	29001.7	9257.05	0		0.139505	0.443384	0.0130994	0.00580805	0.00646052	0.831553	0.543319	2.16868	1.18494
1875	0	29011.7	9257.05	0		0.236536	0.302775	0.0264818	0.008018	0.00919046	0.806969	0.469273	2.87411	1.37392
1876	0	29021.7	9257.05	0		0.283555	0.389235	0.0270503	0.0105289	0.0144773	0.672704	0.527951	2.26126	1.43616
1877	0	29031.7	9257.05	0		0.0252865	0.338261	0.029636	0.0100247	0.0117753	0.787454	0.528113	2.17033	1.40531
1878	0	29041.7	9257.05	0		0.218404	0.314258	0.0293783	0.00923236	0.0122608	0.696499	0.551948	2.09832	1.3375
1879	0	29051.7	9257.05	0		0.188773	0.582405	0.0123179	0.00717404	0.00708477	0.936625	0.490073	2.2587	1.56239
1880	0	29061.7	9257.05	0		0.144959	0.710731	0.119959	0.0852585	0.00857456	0.858536	0.564207	2.07838	1.18273
1881	0	29071.7	9257.05	0		0.208572	0.573858	0.0131373	0.00753894	0.00874103	0.797765	0.575109	1.77634	1.21803
1882	0	29081.7	9257.05	0		0.017435	0.484035	0.0169698	0.00821396	0.00878696	0.864652	0.576962	2.07454	1.08657
1883	0	29091.7	9257.05	0		0.0136996	0.52025	0.0156201	0.00812634	0.00896812	0.838149	0.413362	2.00453	1.02918
1884	0	29101.7	9257.05	0		0.0284448	0.434381	0.0271202	0.0117805	0.0132192	0.824298	0.526448	2.00835	1.2297
1885	0	29111.7	9257.05	0		0.0251698	0.301547	0.0293638	0.00885457	0.013627	0.601027	0.571476	2.41942	1.31478
1886	0	29121.7	9257.05	0		0.0239055	0.333053	0.0252641	0.00841428	0.0087422	0.890274	0.585658	2.16293	1.17045
1887	0	29131.7	9257.05	0		0.0243014	0.38698	0.0269013	0.0104103	0.0105494	0.912768	0.574648	2.22426	1.40847
1888	0	29141.7	9257.05	0		0.0192318	0.351535	0.0186527	0.00655708	0.00685549	0.884708	0.552014	2.46233	1.40405
1889	0	29151.7	9257.05	0		0.0331748	0.428894	0.0303283	0.0130076	0.0129755	0.927259	0.607498	2.51593	1.21353
1890	0	29161.7	9257.05	0		0.0262431	0.516139	0.0239331	0.0123528	0.0155117	0.736603	0.563083	2.80765	1.1785
1891	0	29171.7	9257.05	0		0.0317428	0.434905	0.293323	0.127568	0.0134227	0.873927	0.505921	3.14478	1.12317
1892	0	29181.7	9257.05	0		0.0197985	0.445688	0.0177145	0.00789515	0.0088575	0.824473	0.5398	2.86667	1.14781
1893	0	29191.7	9257.05	0		0.0320716	0.530406	0.0215109	0.0114095	0.0146905	0.718385	0.554728	2.62306	1.34532
1894	0	29201.7	9257.05	0		0.0259118	0.673772	0.0223288	0.0150445	0.0169426	0.821344	0.613285	2.83017	1.10136
1895	0	29211.7	9257.05	0		0.0368968	0.469543	0.0280415	0.0131667	0.0164186	0.74177	0.692218	2.32375	1.20329
[truncated: 14,170 more rows]
