# Supplementary material for: Untargeted pixel-by-pixel metabolite ratio imaging as a novel tool for biomedical discovery in mass spectrometry imaging
Source: eLife. 2025 Mar 18;13:RP96892. doi: 10.7554/eLife.96892 (PMC11919253; doi:10.7554/eLife.96892)
Supplement: Figure 4—source data 1. [file elife-96892-fig4-data1.xlsx]

## Sheet: Figure 4 source dat
spotId	raster	x	y	z	Date	Docosahexaenoic Acid/Arachidonic Acid	Oleic Acid/Stearic Acid	Palmitoleic Acid /Palmitic Acid	LPA 18:2 /LPA 18:1	CPA 18:2/CPA 18:1	PA 38:6/PA 38:4	PA 38:6 /PA 38:3	Stearic Acid/Palmitic Acid	CPA 18:0 /CPA 16:0	LPA 20:1/LPA 18:1	LPA 18:0/PA 34:2	LPA 18:2/PA 34:2
3944	Regions/COXKO	14073.7	14542.2	0		0.94661	1.47748	0.321769	1.07476	1.05911	1.08278	1.08419	0.702875	2.30818	1.20983	0.788314	0.654784
3945	Regions/COXKO	14153.7	14542.2	0		0.647621	1.03919	0.140459	0.874021	1.83507	0.0316261	0.0406816	1.00768	3.17166	0.0760275	0.647544	0.187749
3980	Regions/COXKO	13993.7	14462.2	0		0.72063	0.852913	0.00848625	0.898271	1.52839	0.0307875	0.0486097	1.08614	2.83873	0.0624945	0.42407	0.209084
3981	Regions/COXKO	14073.7	14462.2	0		0.710276	0.654902	0.117727	0.994486	1.6013	0.129253	0.133677	1.60525	3.47972	0.784552	0.832219	0.177055
3982	Regions/COXKO	14153.7	14462.2	0		0.778187	1.03603	0.135704	0.990646	1.85137	0.186701	0.232435	0.992645	3.24061	0.519981	0.637888	0.20714
3983	Regions/COXKO	14233.7	14462.2	0		0.656627	0.72848	0.0860132	0.0742945	1.19818	0.0349694	0.0511107	1.23727	3.39446	0.083632	0.996964	0.018466
4019	Regions/COXKO	13993.7	14382.2	0		0.736048	0.704962	0.123068	0.870401	1.88725	0.0181218	0.0227972	1.67954	4.22492	0.605327	1.22847	0.240267
4020	Regions/COXKO	14073.7	14382.2	0		0.567484	0.862542	0.0961219	0.864519	1.54004	0.0301065	0.040189	1.17171	3.29894	0.709918	0.785616	0.273531
4021	Regions/COXKO	14153.7	14382.2	0		0.618559	0.56804	0.116844	0.87215	1.46293	0.259137	0.262048	1.59015	3.32514	0.457417	1.03303	0.29747
4022	Regions/COXKO	14233.7	14382.2	0		0.643559	0.716306	0.081021	0.743419	1.49072	0.135684	0.19601	1.46408	4.28553	0.0538427	1.27568	0.17591
4023	Regions/COXKO	14313.7	14382.2	0		0.94661	1.47748	0.321769	1.07476	1.05911	1.08278	1.08419	0.702875	2.30818	1.20983	0.788314	0.654784
4059	Regions/COXKO	13993.7	14302.2	0		0.591265	0.819591	0.125276	12.6362	1.30078	0.0455136	0.0619917	1.57819	4.67864	1.20983	1.7668	0.396216
4060	Regions/COXKO	14073.7	14302.2	0		0.532959	0.67229	0.0110436	1.07476	22.8215	1.08278	1.08419	1.13175	2.90354	1.20983	1.31932	0.0409376
4061	Regions/COXKO	14153.7	14302.2	0		0.628432	0.750047	0.0730014	0.956262	1.41975	0.143237	0.15574	1.23095	3.33988	0.547822	0.949362	0.231967
4062	Regions/COXKO	14233.7	14302.2	0		0.677023	0.827904	0.0612804	0.827216	1.06957	0.025128	0.0327739	1.14336	3.276	0.0469898	1.08968	0.314354
4063	Regions/COXKO	14313.7	14302.2	0		0.654881	0.662964	0.0799031	0.874716	1.21878	0.149321	0.165832	1.36252	3.59189	0.49919	0.901859	0.215594
4064	Regions/COXKO	14393.7	14302.2	0		0.636534	0.701413	0.10417	1.04732	1.74426	0.103891	0.11485	1.60315	3.98285	0.576162	0.756732	0.15419
4069	Regions/COXKO	14793.7	14302.2	0		0.94661	1.47748	0.321769	1.07476	1.05911	1.08278	1.08419	0.702875	2.30818	1.20983	0.788314	0.654784
4070	Regions/COXKO	14873.7	14302.2	0		0.94661	1.47748	0.321769	1.07476	1.05911	1.08278	1.08419	0.702875	2.30818	1.20983	0.788314	0.654784
4071	Regions/COXKO	14953.7	14302.2	0		0.703958	0.633876	0.023551	1.07476	1.05911	1.08278	1.08419	0.875934	27.51	1.20983	0.788314	0.654784
4101	Regions/COXKO	13993.7	14222.2	0		0.94661	1.47748	0.321769	1.07476	1.05911	1.08278	1.08419	0.702875	2.30818	1.20983	0.788314	0.654784
4102	Regions/COXKO	14073.7	14222.2	0		0.594684	1.01163	0.0889335	0.869231	1.37892	0.193253	0.310314	0.912756	2.72601	0.510278	0.712999	0.220489
4103	Regions/COXKO	14153.7	14222.2	0		0.644671	0.833197	0.0899759	1.01191	1.60537	0.207705	0.3037	1.1358	2.86316	0.0400571	0.758501	0.251304
4104	Regions/COXKO	14233.7	14222.2	0		0.639329	0.903726	0.108957	0.737952	1.78943	0.0211617	0.023563	1.17781	3.13734	0.0453594	0.809131	0.18575
4105	Regions/COXKO	14313.7	14222.2	0		0.625539	0.731846	0.126706	1.02098	1.72068	0.213578	0.210911	1.41042	3.90353	0.858882	0.911869	0.224114
4106	Regions/COXKO	14393.7	14222.2	0		0.643102	0.509616	0.117085	0.837188	1.64745	0.020004	0.0212447	1.81976	3.68552	0.460812	1.11118	0.251791
4110	Regions/COXKO	14713.7	14222.2	0		0.67395	1.15041	0.00946702	1.07476	26.0347	0.0614544	0.0674859	0.933094	3.66702	1.20983	0.0580292	0.0481998
4111	Regions/COXKO	14793.7	14222.2	0		0.802344	1.03319	0.00871283	1.26263	1.58739	0.0370461	0.0431905	1.16057	2.9047	0.119472	0.726211	0.19776
4112	Regions/COXKO	14873.7	14222.2	0		0.740722	0.948394	0.13709	1.22565	1.8234	0.0237416	0.0312524	1.18076	3.36113	0.0672701	0.714902	0.237213
4113	Regions/COXKO	14953.7	14222.2	0		0.716834	1.00281	0.105812	1.06266	1.59772	0.0248651	0.0298834	1.12887	3.43005	0.0651701	0.692153	0.189437
4114	Regions/COXKO	15033.7	14222.2	0		0.797283	1.04498	0.115263	0.87045	1.50292	0.22158	0.266706	1.08902	3.41687	0.611612	0.522479	0.123939
4144	Regions/COXKO	13993.7	14142.2	0		0.827246	0.828168	0.0156068	1.07476	0.0509832	1.08278	1.08419	1.06577	75.5764	1.20983	0.627333	0.0281764
4145	Regions/COXKO	14073.7	14142.2	0		0.61434	0.607695	0.110948	1.08303	1.52783	0.196057	0.148666	1.75473	3.89592	0.496159	1.13058	0.332248
4146	Regions/COXKO	14153.7	14142.2	0		0.675145	1.08529	0.151911	14.9002	1.31603	0.0779644	0.0478542	1.15332	2.93978	1.20983	1.00536	0.348419
4147	Regions/COXKO	14233.7	14142.2	0		0.707924	0.743095	0.0870076	0.865333	1.6735	0.0268395	0.0252606	1.27653	4.02384	0.720186	0.771142	0.165542
4148	Regions/COXKO	14313.7	14142.2	0		0.702828	0.752459	0.111813	1.19826	2.20928	0.185518	0.218867	1.24519	2.99876	1.02761	0.555444	0.1971
4149	Regions/COXKO	14393.7	14142.2	0		0.693308	0.733441	0.0816466	0.662616	1.96219	0.200046	0.14703	1.56026	3.59774	0.479185	1.13103	0.237576
4150	Regions/COXKO	14473.7	14142.2	0		0.569447	0.645485	0.0661781	0.658107	1.99864	0.0169835	0.0111782	1.8794	4.80114	0.479691	1.03835	0.157768
4151	Regions/COXKO	14553.7	14142.2	0		0.652286	0.819544	0.0897838	1.16832	1.32063	0.174153	0.207889	1.45458	3.42613	0.630537	0.821725	0.208373
4152	Regions/COXKO	14633.7	14142.2	0		0.678709	0.718681	0.13173	0.761807	1.38422	0.0173855	0.0188937	1.51542	3.37858	0.604985	0.979011	0.233825
4153	Regions/COXKO	14713.7	14142.2	0		0.714618	0.853854	0.0934641	0.978019	1.50451	0.255121	0.26534	1.27994	3.6212	0.0568766	0.716785	0.213967
4154	Regions/COXKO	14793.7	14142.2	0		0.563697	0.629332	0.100331	0.998353	1.41441	0.22071	0.244465	1.51852	3.13361	1.03925	1.06523	0.255768
4155	Regions/COXKO	14873.7	14142.2	0		0.696076	0.847277	0.133687	1.13577	1.48382	0.179501	0.234953	1.23358	3.03769	0.606328	0.904504	0.254073
4156	Regions/COXKO	14953.7	14142.2	0		0.886634	1.34809	0.128863	0.0904357	1.60166	0.236397	0.266448	0.852019	2.99547	0.101802	0.442447	0.0134124
4157	Regions/COXKO	15033.7	14142.2	0		21.6984	1.47748	0.321769	1.07476	1.05911	1.08278	1.08419	0.702875	2.30818	1.20983	0.788314	0.654784
4187	Regions/COXKO	13913.7	14062.2	0		0.575571	1.16434	0.0144928	1.07476	25.1242	1.08278	0.0601264	0.803899	2.44237	1.20983	0.423289	0.0189375
4188	Regions/COXKO	13993.7	14062.2	0		0.670555	0.828564	0.0984135	0.953523	1.79966	0.162715	0.17294	1.319	3.59379	0.702659	0.677004	0.177226
4189	Regions/COXKO	14073.7	14062.2	0		0.908413	1.11819	0.0155503	1.07476	19.3664	1.08278	1.08419	0.682746	2.12768	1.20983	0.763076	0.0376521
4190	Regions/COXKO	14153.7	14062.2	0		0.700353	0.866164	0.112241	0.754957	1.46782	0.0279678	0.0283132	1.10375	3.41919	0.555167	0.712451	0.207684
4191	Regions/COXKO	14233.7	14062.2	0		0.561689	0.598689	0.112741	1.25015	2.09072	0.281894	0.310291	1.4699	4.07074	0.737114	0.85621	0.188597
4192	Regions/COXKO	14313.7	14062.2	0		0.696379	0.97551	0.0957645	1.2284	1.61357	0.147512	0.165066	0.96945	3.37949	0.486833	0.557799	0.209345
4193	Regions/COXKO	14393.7	14062.2	0		0.591751	0.636033	0.102539	0.876527	1.7348	0.100003	0.0774649	1.58801	4.00723	0.641417	1.03788	0.294927
4194	Regions/COXKO	14473.7	14062.2	0		0.64959	0.760701	0.102779	0.833038	1.45	0.0310186	0.032107	1.42434	3.10214	0.0485048	0.755803	0.238171
4195	Regions/COXKO	14553.7	14062.2	0		0.718868	0.789203	0.163764	0.688964	1.27791	0.214082	0.26294	1.52419	2.66506	0.422725	0.917129	0.21716
4196	Regions/COXKO	14633.7	14062.2	0		0.647145	0.762128	0.102976	0.726322	1.5421	0.175204	0.193087	1.43008	3.22707	0.489591	0.812255	0.189618
4197	Regions/COXKO	14713.7	14062.2	0		0.687144	0.786614	0.147471	1.22839	1.57791	0.247178	0.274604	1.3041	3.3134	0.558086	0.92283	0.274356
4198	Regions/COXKO	14793.7	14062.2	0		0.686994	0.708921	0.134954	0.686879	1.35436	0.18556	0.205572	1.43776	3.42928	0.501912	0.868619	0.197006
4199	Regions/COXKO	14873.7	14062.2	0		0.652964	1.00125	0.120554	0.863797	1.43896	0.326849	0.363446	1.07666	3.2099	0.052259	0.821671	0.267018
4232	Regions/COXKO	13833.7	13982.2	0		0.915742	0.663304	0.0169175	20.1254	26.9088	1.08278	1.08419	1.53305	3.82893	1.20983	17.3573	12.2612
4233	Regions/COXKO	13913.7	13982.2	0		0.719055	0.941487	0.13339	0.782122	1.65106	0.211865	0.202806	1.10251	3.59515	0.365561	0.850002	0.191104
4234	Regions/COXKO	13993.7	13982.2	0		0.626055	0.71346	0.127725	0.858442	1.38285	0.196091	0.181013	1.38521	3.38501	0.615596	0.904741	0.247701
4235	Regions/COXKO	14073.7	13982.2	0		0.601233	0.817795	0.0980035	1.01562	1.14356	0.0364511	0.0408827	1.18554	4.82055	0.0916332	0.736397	0.210724
4236	Regions/COXKO	14153.7	13982.2	0		0.68822	0.837998	0.0996411	1.23255	1.908	0.210882	0.158094	1.24322	3.59706	0.67099	0.764079	0.255303
4237	Regions/COXKO	14233.7	13982.2	0		0.587079	0.559262	0.108088	1.07386	1.94469	0.0171084	0.0186745	1.73651	3.77763	0.0404392	1.08009	0.286066
4238	Regions/COXKO	14313.7	13982.2	0		0.681147	0.807565	0.131087	0.800071	1.68803	0.0277774	0.0236706	1.19729	2.83061	0.809987	0.69857	0.189278
4239	Regions/COXKO	14393.7	13982.2	0		0.662199	0.782381	0.0946729	0.827541	1.45163	0.138672	0.133721	1.29743	2.99472	0.430475	0.759531	0.189664
4240	Regions/COXKO	14473.7	13982.2	0		0.623529	0.790885	0.116493	0.729199	1.32169	0.163945	0.14388	1.41709	2.86102	0.514666	0.771282	0.182448
4241	Regions/COXKO	14553.7	13982.2	0		0.630631	0.718713	0.122052	1.06772	1.52948	0.165914	0.125014	1.51225	3.50885	0.564513	1.01901	0.320464
4242	Regions/COXKO	14633.7	13982.2	0		0.618907	0.723351	0.114611	0.623104	1.54129	0.192078	0.208331	1.48928	2.98959	0.506056	0.793066	0.174795
4243	Regions/COXKO	14713.7	13982.2	0		0.636651	0.796586	0.114982	0.856499	1.45359	0.156809	0.146117	1.3041	3.15139	0.588096	0.885336	0.220916
4244	Regions/COXKO	14793.7	13982.2	0		0.667314	0.803411	0.10755	0.937397	1.51966	0.187703	0.193013	1.32451	3.39468	0.558447	0.838798	0.221392
4245	Regions/COXKO	14873.7	13982.2	0		0.593809	0.830223	0.0940668	0.859751	1.51874	0.0224772	0.0178873	1.49241	3.70878	0.586459	0.711346	0.18347
4276	Regions/COXKO	13593.7	13902.2	0		0.767277	1.09818	0.156002	1.07476	1.34291	0.0305123	0.0643807	0.938274	2.86676	1.20983	0.568674	0.0172044
4277	Regions/COXKO	13673.7	13902.2	0		0.94661	1.47748	0.321769	1.07476	1.05911	1.08278	1.08419	0.702875	2.30818	1.20983	0.788314	0.654784
4278	Regions/COXKO	13753.7	13902.2	0		0.94661	1.47748	0.321769	1.07476	1.05911	1.08278	1.08419	0.702875	2.30818	1.20983	0.788314	0.654784
4279	Regions/COXKO	13833.7	13902.2	0		0.625558	0.825892	0.129039	1.56347	2.11824	0.0229526	0.0282232	1.13019	2.37774	0.0624561	0.721969	0.26582
4280	Regions/COXKO	13913.7	13902.2	0		0.737086	0.95226	0.107442	0.928958	1.68776	0.221146	0.201309	1.04333	3.08491	0.555337	0.599215	0.167391
4281	Regions/COXKO	13993.7	13902.2	0		0.577302	0.702716	0.0871689	0.873649	1.66145	0.174197	0.160259	1.54618	3.70446	0.561157	1.07384	0.277777
4282	Regions/COXKO	14073.7	13902.2	0		0.630085	0.655305	0.10346	0.937503	1.36198	0.144961	0.119994	1.47134	3.52248	0.78421	0.943736	0.244069
4283	Regions/COXKO	14153.7	13902.2	0		0.680585	0.849508	0.131354	0.984068	1.56978	0.170022	0.220086	1.28218	2.4684	0.605984	0.753793	0.198384
4284	Regions/COXKO	14233.7	13902.2	0		0.521565	0.581961	0.080847	1.28849	2.12066	0.025852	0.0253538	1.63234	3.1367	0.936277	1.0111	0.334402
4285	Regions/COXKO	14313.7	13902.2	0		0.635752	0.717841	0.109499	0.756237	1.66622	0.194903	0.195781	1.61963	3.76791	0.493675	0.89807	0.224296
4286	Regions/COXKO	14393.7	13902.2	0		0.612927	0.750384	0.129951	0.940963	1.40631	0.0186905	0.0157105	1.4888	4.16901	0.861149	1.03353	0.265164
4287	Regions/COXKO	14473.7	13902.2	0		0.670616	0.677445	0.111895	0.84023	1.74724	0.0209501	0.0151685	1.66174	3.28709	0.702956	1.10907	0.26258
4288	Regions/COXKO	14553.7	13902.2	0		0.522418	0.689262	0.120354	0.0469707	2.10188	0.0252501	0.0213896	1.41055	3.57189	0.775487	0.758361	0.012872
4289	Regions/COXKO	14633.7	13902.2	0		0.635605	0.766303	0.126516	0.669546	1.44163	0.0335099	0.0327553	1.23514	3.15562	0.0519946	0.770065	0.217493
4290	Regions/COXKO	14713.7	13902.2	0		0.655792	0.66543	0.120843	0.581815	1.54984	0.136985	0.114597	1.48018	3.53089	0.570391	1.0263	0.187793
4291	Regions/COXKO	14793.7	13902.2	0		0.62961	0.790689	0.14363	0.884973	1.4372	0.220127	0.260274	1.33096	2.70124	0.614339	0.596807	0.17816
4323	Regions/COXKO	13433.7	13822.2	0		0.768386	1.25557	0.18801	0.799821	1.33885	0.0394318	0.0495309	1.00486	2.2969	0.0771528	0.590055	0.181814
4324	Regions/COXKO	13513.7	13822.2	0		0.598968	0.945624	0.116855	0.79122	1.23785	0.223983	0.273014	1.08366	2.89826	0.385739	0.669053	0.199933
4325	Regions/COXKO	13593.7	13822.2	0		0.601631	0.93639	0.131195	0.705287	1.2789	0.261314	0.403107	1.02796	2.58226	0.262928	0.702704	0.200664
4326	Regions/COXKO	13673.7	13822.2	0		0.647034	0.84415	0.147591	0.820846	1.70484	0.0379178	0.0355203	1.12845	2.97495	0.0515227	0.836198	0.256152
4327	Regions/COXKO	13753.7	13822.2	0		0.599457	0.803389	0.120986	1.50162	1.72785	0.0339582	0.025759	1.4279	2.92953	0.8819	0.626852	0.305653
4328	Regions/COXKO	13833.7	13822.2	0		0.561618	0.706235	0.115326	0.78499	1.5919	0.203933	0.200763	1.4723	3.71435	0.729377	0.951973	0.209429
4329	Regions/COXKO	13913.7	13822.2	0		0.662967	0.777614	0.106371	0.844769	1.46767	0.206927	0.223176	1.2644	2.6439	0.531912	0.845964	0.263965
4330	Regions/COXKO	13993.7	13822.2	0		0.653892	0.833602	0.0953934	0.879121	1.56519	0.179691	0.164816	1.14863	2.99574	0.456787	0.60411	0.170269
4331	Regions/COXKO	14073.7	13822.2	0		0.585816	0.663367	0.0982181	1.05108	1.65374	0.226821	0.208595	1.4203	3.26582	0.579569	0.982766	0.25734
4332	Regions/COXKO	14153.7	13822.2	0		0.605527	0.67184	0.0800248	1.03669	1.43307	0.133852	0.110888	1.37212	3.19285	0.645782	0.910254	0.247539
4333	Regions/COXKO	14233.7	13822.2	0		0.591582	0.635833	0.0845302	0.842674	1.79617	0.209938	0.201636	1.58906	3.65684	0.569972	0.98563	0.237822
4334	Regions/COXKO	14313.7	13822.2	0		0.660188	0.749719	0.131437	0.929983	1.317	0.0273187	0.0198703	1.31405	3.30964	0.986776	0.729565	0.169732
4335	Regions/COXKO	14393.7	13822.2	0		0.620409	0.709026	0.11241	0.526031	1.41174	0.197778	0.1765	1.4292	3.22833	0.34314	0.983701	0.194273
4336	Regions/COXKO	14473.7	13822.2	0		0.657087	0.801742	0.112084	0.882403	1.67611	0.208457	0.240035	1.41956	3.46023	0.418972	0.781009	0.229182
4337	Regions/COXKO	14553.7	13822.2	0		0.749036	0.837948	0.109982	0.772489	1.42126	0.2389	0.213237	1.30335	3.10236	0.39827	0.829951	0.188591
4338	Regions/COXKO	14633.7	13822.2	0		0.7066	0.871848	0.131504	1.22135	1.28783	0.242658	0.255131	1.17258	3.03871	0.887815	0.792017	0.25281
4372	Regions/COXKO	13353.7	13742.2	0		0.585368	1.44019	0.134949	1.02833	1.46811	0.0464054	0.0530261	0.767652	2.68225	0.0784328	0.756796	0.299668
4373	Regions/COXKO	13433.7	13742.2	0		0.626853	1.16687	0.11603	0.902376	1.23095	0.227296	0.270173	1.07396	2.95467	0.45717	0.682986	0.183079
4374	Regions/COXKO	13513.7	13742.2	0		0.550109	0.953502	0.129706	0.845094	1.42886	0.153002	0.125446	1.06511	2.67622	0.477657	0.752439	0.223094
4375	Regions/COXKO	13593.7	13742.2	0		0.605195	1.07799	0.126387	0.998277	1.12174	0.202534	0.274173	0.855854	2.05784	0.567996	0.615583	0.215896
4376	Regions/COXKO	13673.7	13742.2	0		0.616789	1.10386	0.125169	1.07361	1.56841	0.277769	0.294142	0.746067	2.77013	0.377707	0.501087	0.225116
4377	Regions/COXKO	13753.7	13742.2	0		0.673412	0.875607	0.0708943	0.896341	1.40548	0.230719	0.261394	0.794819	2.35319	0.493569	0.792876	0.22106
4378	Regions/COXKO	13833.7	13742.2	0		0.643582	0.727341	0.104402	0.889644	1.59381	0.0211059	0.0197734	1.3241	3.01945	0.0455968	0.70767	0.194207
4379	Regions/COXKO	13913.7	13742.2	0		0.586772	0.714123	0.108159	0.856446	1.20622	0.253662	0.236658	1.22461	3.03599	0.544186	0.714576	0.226964
4380	Regions/COXKO	13993.7	13742.2	0		0.581666	0.718576	0.136707	0.760382	1.39722	0.136489	0.142372	1.44691	2.99042	0.448154	0.861347	0.24335
4381	Regions/COXKO	14073.7	13742.2	0		0.608605	0.674032	0.0902239	0.721373	1.69881	0.207383	0.15963	1.53259	3.03267	0.494302	0.937728	0.223696
4382	Regions/COXKO	14153.7	13742.2	0		0.679072	0.817585	0.0896924	0.818253	1.52713	0.185772	0.181723	1.23248	2.94136	0.429321	0.611337	0.165136
4383	Regions/COXKO	14233.7	13742.2	0		0.563063	0.763989	0.11049	0.685228	1.459	0.242253	0.226872	1.39312	3.42711	0.576316	0.913562	0.172219
4384	Regions/COXKO	14313.7	13742.2	0		0.826067	0.841739	0.127883	1.95848	1.80068	0.0308307	0.0417044	1.34935	2.49293	0.104032	0.625135	0.2458
4385	Regions/COXKO	14393.7	13742.2	0		0.669697	0.742963	0.105573	0.7464	1.24231	0.160809	0.148546	1.4902	3.2146	0.549768	0.688078	0.138736
4386	Regions/COXKO	14473.7	13742.2	0		0.802526	0.765749	0.133396	0.801393	1.16353	0.191721	0.269983	1.22013	2.63789	0.545866	0.766926	0.168769
4423	Regions/COXKO	13353.7	13662.2	0		0.575941	0.849235	0.136165	0.871601	1.25735	0.274407	0.316425	1.14894	2.63993	0.489685	0.906205	0.217268
4424	Regions/COXKO	13433.7	13662.2	0		0.515577	0.907078	0.13077	0.837592	1.37161	0.157403	0.134598	1.25221	3.01803	0.468103	0.786455	0.208308
4425	Regions/COXKO	13513.7	13662.2	0		0.616405	1.28693	0.166461	0.706742	0.972578	0.384562	0.458164	0.76046	2.20729	0.0611453	0.424184	0.134818
4426	Regions/COXKO	13593.7	13662.2	0		0.597589	0.837641	0.100069	0.717927	1.24433	0.253324	0.249612	1.0317	2.39492	0.472665	0.641052	0.179388
4427	Regions/COXKO	13673.7	13662.2	0		0.634474	0.938911	0.0904611	0.742691	1.53211	0.196485	0.172243	0.913865	2.93861	0.496248	0.679016	0.192415
4428	Regions/COXKO	13753.7	13662.2	0		0.618548	0.843494	0.0851709	0.74804	1.02325	0.0290672	0.0366582	1.01207	2.84762	0.0525183	0.81049	0.205901
4429	Regions/COXKO	13833.7	13662.2	0		0.596326	0.726153	0.159302	0.837786	1.65896	0.0374421	0.0281315	1.35042	2.81951	0.626097	0.715067	0.237648
4430	Regions/COXKO	13913.7	13662.2	0		0.628732	0.713366	0.124814	1.76165	1.58468	0.242048	0.200974	1.25686	3.19991	0.794002	0.729808	0.321129
4431	Regions/COXKO	13993.7	13662.2	0		0.569931	0.634916	0.0829029	0.811831	1.51256	0.189837	0.172611	1.35714	2.62816	0.465532	0.676349	0.195449
4432	Regions/COXKO	14073.7	13662.2	0		0.592009	0.668137	0.095953	0.85978	1.32028	0.0240332	0.0257893	1.33267	2.8433	0.0428954	0.71213	0.245111
4433	Regions/COXKO	14153.7	13662.2	0		0.563116	0.713119	0.107959	1.02357	1.25754	0.271004	0.250336	1.40583	2.84221	0.551914	0.606578	0.207399
4434	Regions/COXKO	14233.7	13662.2	0		25.0503	1.22652	0.024013	1.07476	1.05911	0.055361	1.08419	0.767544	31.4915	1.20983	0.0348328	0.0289326
4435	Regions/COXKO	14313.7	13662.2	0		0.94661	1.47748	0.321769	1.07476	1.05911	1.08278	1.08419	0.702875	2.30818	1.20983	0.0452027	0.037546
4436	Regions/COXKO	14393.7	13662.2	0		0.654606	0.84702	0.155147	0.711491	1.49076	0.0368524	0.0454895	1.22679	2.85469	0.0492575	0.974337	0.252944
4461	Regions/COXKO	16393.7	13662.2	0		0.764289	1.17474	0.127688	0.777084	1.22611	0.420702	0.474561	1.10173	3.3992	0.0797328	0.697503	0.170186
4462	Regions/COXKO	16473.7	13662.2	0		0.60323	0.781458	0.125984	0.651534	1.41358	0.0164214	0.0167391	1.64708	3.79284	0.356516	1.094	0.232808
4476	Regions/COXKO	13353.7	13582.2	0		0.607689	0.959962	0.111234	1.17359	1.29851	0.291955	0.360598	0.900917	2.24989	0.464535	0.557195	0.210585
4477	Regions/COXKO	13433.7	13582.2	0		0.615124	1.00683	0.124741	1.10038	1.39919	0.0249092	0.0220016	1.08146	2.3369	0.623509	0.841681	0.330646
4478	Regions/COXKO	13513.7	13582.2	0		0.594289	0.87993	0.116973	1.1033	1.51504	0.185772	0.175673	1.24332	2.92867	0.528472	0.586321	0.195803
4479	Regions/COXKO	13593.7	13582.2	0		0.558671	0.90583	0.0786105	0.783025	1.41699	0.220511	0.234601	0.856045	2.46465	0.516502	0.537107	0.153203
4480	Regions/COXKO	13673.7	13582.2	0		0.643928	0.953793	0.0953836	1.26405	1.43286	0.307591	0.330125	0.847744	2.59405	0.589165	0.480101	0.22522
4481	Regions/COXKO	13753.7	13582.2	0		0.606152	0.8287	0.119845	1.00751	1.67504	0.176647	0.158025	1.14698	2.93979	0.586183	0.88623	0.221675
4482	Regions/COXKO	13833.7	13582.2	0		0.688444	0.891172	0.113465	1.11294	1.63213	0.177382	0.15627	1.17787	3.25935	0.497824	0.654195	0.205376
4483	Regions/COXKO	13913.7	13582.2	0		0.640912	0.714025	0.129507	1.07145	1.9348	0.240937	0.267604	1.32178	2.84812	0.748303	0.684065	0.203582
4484	Regions/COXKO	13993.7	13582.2	0		0.58442	0.741675	0.127213	1.22996	1.58092	0.0176329	0.0210559	1.39418	2.94084	0.0453462	0.868376	0.274076
4485	Regions/COXKO	14073.7	13582.2	0		0.631383	0.968029	0.139234	0.0586322	1.72963	0.0349566	0.0311673	1.04501	2.15251	0.0660013	0.475812	0.0101589
4486	Regions/COXKO	14153.7	13582.2	0		0.629735	0.800494	0.102622	1.16985	1.4464	0.337126	0.315182	1.11124	2.52366	0.728002	0.595518	0.213519
4487	Regions/COXKO	14233.7	13582.2	0		0.722634	0.804202	0.110504	0.754131	1.39286	0.183541	0.164193	1.22232	2.80877	0.37725	0.715391	0.165261
4488	Regions/COXKO	14313.7	13582.2	0		0.698754	0.900194	0.115788	0.905061	1.54458	0.25393	0.210318	1.15028	2.70838	0.568118	0.613895	0.189668
4489	Regions/COXKO	14393.7	13582.2	0		0.595874	1.03172	0.171133	0.539645	1.37192	0.28629	0.464803	0.996498	2.69438	0.0448886	0.713781	0.205304
4499	Regions/COXKO	15193.7	13582.2	0		0.68058	0.758849	0.18195	0.0485267	2.66547	0.0405397	1.08419	1.31125	2.72787	0.0546256	1.06924	0.0218578
4500	Regions/COXKO	15273.7	13582.2	0		0.720087	1.06392	0.17397	1.3753	1.87939	0.0275205	0.0326401	0.89179	2.05338	1.09613	0.533017	0.168808
4501	Regions/COXKO	15353.7	13582.2	0		0.720289	1.50408	0.0344934	1.07476	1.05911	1.08278	1.08419	0.989391	30.8758	1.20983	0.0570556	0.0473911
4502	Regions/COXKO	15433.7	13582.2	0		0.812841	1.07029	0.106286	1.17767	1.28456	0.344197	0.395129	1.06575	2.89493	0.0670971	0.587606	0.236979
4503	Regions/COXKO	15513.7	13582.2	0		0.94661	1.11282	0.0449062	1.07476	1.05911	1.08278	1.08419	1.21977	2.30818	1.20983	0.040673	0.0337836
4504	Regions/COXKO	15593.7	13582.2	0		0.94661	1.47748	0.321769	1.07476	1.05911	1.08278	1.08419	0.702875	2.30818	1.20983	0.788314	0.654784
4505	Regions/COXKO	15673.7	13582.2	0		0.900101	1.11358	0.131268	1.08102	1.27427	0.0571161	0.066863	1.06561	3.3686	0.0917984	1.17896	0.394056
4506	Regions/COXKO	15753.7	13582.2	0		0.94661	12.2838	0.321769	1.07476	1.05911	1.08278	1.08419	0.702875	21.3135	1.20983	0.788314	0.654784
4507	Regions/COXKO	15833.7	13582.2	0		0.668096	1.09739	0.0242394	1.07476	18.5683	1.08278	1.08419	1.0311	52.5466	1.20983	0.788314	0.654784
4513	Regions/COXKO	16313.7	13582.2	0		0.94661	1.47748	0.321769	1.07476	1.05911	1.08278	1.08419	0.702875	2.30818	1.20983	0.788314	0.654784
4514	Regions/COXKO	16393.7	13582.2	0		0.671385	0.891516	0.151463	0.78422	1.24483	0.238933	0.266974	1.4064	2.85787	0.0446143	0.678414	0.168254
4515	Regions/COXKO	16473.7	13582.2	0		0.892669	1.07409	0.133017	0.973129	1.31777	0.223617	0.264266	1.16469	2.73362	0.520101	0.650683	0.186126
4516	Regions/COXKO	16553.7	13582.2	0		0.834909	1.27157	0.174745	18.8901	1.22837	0.071706	0.0802578	0.964919	2.28944	1.20983	0.796083	0.460548
4531	Regions/COXKO	13433.7	13502.2	0		0.657312	0.702932	0.109345	0.91851	1.64451	0.0196566	0.0198075	1.47368	3.21631	0.472704	0.97413	0.279883
4532	Regions/COXKO	13513.7	13502.2	0		0.626404	0.887321	0.131907	0.764715	1.4634	0.198295	0.188568	1.13984	2.78554	0.364064	0.765773	0.232664
4533	Regions/COXKO	13593.7	13502.2	0		0.574865	0.911384	0.071731	0.862609	1.23119	0.196388	0.289429	0.900974	2.14223	0.748389	0.632169	0.187599
4534	Regions/COXKO	13673.7	13502.2	0		0.590822	0.957928	0.0835747	0.938586	1.67615	0.211628	0.223771	0.777685	2.57187	0.608473	0.580486	0.198568
4535	Regions/COXKO	13753.7	13502.2	0		0.636517	0.880582	0.129806	0.880029	1.73357	0.224417	0.206158	1.1356	2.6888	0.649786	0.658786	0.184551
4536	Regions/COXKO	13833.7	13502.2	0		0.685085	0.960229	0.101059	1.08257	1.51943	0.176604	0.169652	1.07803	3.42531	0.658702	0.47361	0.146097
4537	Regions/COXKO	13913.7	13502.2	0		0.640881	0.742117	0.11221	1.34883	1.62541	0.31081	0.304844	1.33319	2.72749	0.76503	0.879997	0.266019
4538	Regions/COXKO	13993.7	13502.2	0		0.690475	0.949334	0.0929573	1.37744	1.97723	0.0228606	0.0197841	1.03178	2.87939	0.0500285	0.593197	0.278325
4539	Regions/COXKO	14073.7	13502.2	0		0.598364	0.743492	0.0976422	1.14074	1.3765	0.229842	0.243497	1.24064	2.77807	0.626168	0.941343	0.262183
4540	Regions/COXKO	14153.7	13502.2	0		0.629384	0.815736	0.0985957	0.941968	1.46634	0.363747	0.460159	1.03669	2.40999	0.0527306	0.707673	0.234103
4541	Regions/COXKO	14233.7	13502.2	0		0.608626	1.07145	0.0744754	0.694298	1.05128	0.0122373	0.0202431	0.787611	2.2548	0.359199	0.618389	0.171849
4542	Regions/COXKO	14313.7	13502.2	0		0.632328	1.00206	0.101346	0.782157	1.22043	0.241199	0.371879	0.824465	2.35832	0.47145	0.577547	0.162872
4543	Regions/COXKO	14393.7	13502.2	0		0.603781	0.800432	0.13839	0.0388141	1.2863	0.0320556	0.0372404	1.12615	2.71905	0.0436923	0.774002	0.0132526
4544	Regions/COXKO	14473.7	13502.2	0		0.722465	1.24646	0.143687	1.07476	1.90306	1.08278	1.08419	0.88558	4.17311	1.20983	0.99245	0.0446998
4552	Regions/COXKO	15113.7	13502.2	0		0.72318	0.907903	0.144568	1.23912	1.3564	0.0249263	0.0250392	1.12558	2.83478	0.0700022	0.776383	0.214378
4553	Regions/COXKO	15193.7	13502.2	0		0.661231	0.803084	0.0076367	1.07476	1.55737	0.0430682	0.0293588	1.33002	2.66519	1.20983	0.713207	0.0161583
4554	Regions/COXKO	15273.7	13502.2	0		0.734914	0.75446	0.127234	0.796792	1.29884	0.272532	0.201315	1.4008	2.66964	0.460867	0.9613	0.29894
4555	Regions/COXKO	15353.7	13502.2	0		0.75748	1.11786	0.125324	0.756857	1.33081	0.0265089	0.0314233	0.999016	2.86016	0.692564	0.644796	0.173842
4556	Regions/COXKO	15433.7	13502.2	0		0.659638	0.830381	0.124506	0.709842	1.40022	0.184735	0.217507	1.34392	3.10902	0.35902	0.802508	0.192379
4557	Regions/COXKO	15513.7	13502.2	0		0.94661	1.47748	0.321769	1.07476	1.05911	1.08278	1.08419	0.702875	2.30818	1.20983	0.788314	0.654784
4558	Regions/COXKO	15593.7	13502.2	0		0.94661	1.47748	0.321769	1.07476	1.05911	1.08278	1.08419	0.702875	2.30818	1.20983	0.788314	0.654784
4559	Regions/COXKO	15673.7	13502.2	0		0.94661	0.145826	0.321769	1.07476	1.05911	1.08278	1.08419	7.12137	23.4615	1.20983	0.788314	0.654784
4560	Regions/COXKO	15753.7	13502.2	0		0.604281	0.994684	0.0101568	1.08848	1.4766	0.0397835	0.0407685	1.18526	2.79336	0.0822795	0.574914	0.240034
4561	Regions/COXKO	15833.7	13502.2	0		0.726939	0.810495	0.0940137	0.901966	1.85264	0.163038	0.195177	1.46002	3.36491	0.455702	0.836118	0.217356
4562	Regions/COXKO	15913.7	13502.2	0		0.844982	1.3788	0.170745	0.894025	1.73098	0.0471496	0.0434684	0.898897	3.03348	0.107683	0.595089	0.162847
4563	Regions/COXKO	15993.7	13502.2	0		0.668028	1.09178	0.174681	0.88139	1.596	0.223798	0.243472	1.08803	3.49066	0.0911574	0.660494	0.15998
4564	Regions/COXKO	16073.7	13502.2	0		0.853409	1.28061	0.12907	0.080988	1.40344	0.28271	0.354411	0.958914	3.28034	0.0911667	0.575114	0.0166968
4565	Regions/COXKO	16153.7	13502.2	0		0.878791	1.62009	0.129643	0.788887	1.40542	0.31754	0.403942	0.782606	4.04034	0.128347	0.507598	0.124086
4566	Regions/COXKO	16233.7	13502.2	0		0.735646	0.882689	0.0866426	0.774815	1.47188	0.125551	0.116336	1.42506	3.49681	0.473186	0.890251	0.18459
4567	Regions/COXKO	16313.7	13502.2	0		0.850666	1.38771	0.200999	1.07476	1.09632	0.0485718	0.0773303	0.969565	3.35193	1.20983	0.5583	0.0191996
4568	Regions/COXKO	16393.7	13502.2	0		0.725859	0.786183	0.0912342	0.853172	1.46968	0.0183759	0.0182599	1.44548	3.62189	0.334931	0.913273	0.217249
4569	Regions/COXKO	16473.7	13502.2	0		0.753675	0.880487	0.219998	19.4779	1.14823	0.0462837	0.0401899	1.3133	2.81346	1.20983	0.595989	0.282595
4570	Regions/COXKO	16553.7	13502.2	0		0.800688	1.14497	0.155136	0.591794	1.61542	0.0473269	0.0623331	1.38147	5.30929	0.0787133	0.919046	0.185391
4588	Regions/COXKO	13593.7	13422.2	0		0.566688	0.971985	0.112453	0.762551	1.20395	0.202668	0.223276	0.912992	2.51858	0.353141	0.729161	0.254167
4589	Regions/COXKO	13673.7	13422.2	0		0.619156	0.812664	0.0681523	1.0066	1.81328	0.169559	0.132627	0.872321	2.46214	0.569091	0.623048	0.187021
4590	Regions/COXKO	13753.7	13422.2	0		0.670316	0.798859	0.0876223	0.9391	1.68542	0.193376	0.150967	1.18157	3.29044	0.693622	0.763377	0.190444
4591	Regions/COXKO	13833.7	13422.2	0		0.62535	0.793172	0.115447	1.02917	1.47275	0.210775	0.208933	1.27936	2.83082	0.765964	0.67631	0.211386
4592	Regions/COXKO	13913.7	13422.2	0		0.611339	0.732926	0.0851905	0.709296	2.15835	0.157188	0.114572	1.37196	3.54205	0.534561	0.640592	0.131602
4593	Regions/COXKO	13993.7	13422.2	0		0.757647	0.978291	0.118145	0.602933	1.63055	0.297588	0.316358	1.0027	2.70958	0.565912	0.531458	0.145981
4594	Regions/COXKO	14073.7	13422.2	0		0.701418	0.78272	0.0818812	1.50542	1.87908	0.225291	0.200826	1.24006	3.26213	0.776858	0.749445	0.272065
4595	Regions/COXKO	14153.7	13422.2	0		0.574881	0.872756	0.133725	0.867841	1.28024	0.022241	0.0345148	1.09374	3.31438	0.694172	0.583266	0.166539
4596	Regions/COXKO	14233.7	13422.2	0		0.681316	1.0373	0.0901495	0.75323	1.1516	0.28577	0.48004	0.746853	1.71879	0.354706	0.696167	0.192617
4597	Regions/COXKO	14313.7	13422.2	0		0.613746	0.778254	0.0905699	0.994316	1.5656	0.201522	0.180205	1.25635	2.62751	0.677543	0.801662	0.217292
4598	Regions/COXKO	14393.7	13422.2	0		0.736707	0.87004	0.108041	0.917521	2.01199	0.0393318	0.0277255	1.06382	1.80952	0.0610241	0.677757	0.257786
4599	Regions/COXKO	14473.7	13422.2	0		0.94661	1.47748	0.321769	1.07476	1.05911	1.08278	1.08419	0.702875	2.30818	1.20983	0.788314	0.654784
4600	Regions/COXKO	14553.7	13422.2	0		0.94661	1.47748	0.321769	1.07476	1.05911	1.08278	1.08419	0.702875	2.30818	1.20983	0.788314	0.654784
4601	Regions/COXKO	14633.7	13422.2	0		0.94661	1.47748	0.321769	1.07476	1.05911	1.08278	1.08419	0.702875	2.30818	1.20983	0.788314	0.654784
4602	Regions/COXKO	14713.7	13422.2	0		0.94661	1.47748	0.321769	1.07476	1.05911	1.08278	1.08419	0.702875	2.30818	1.20983	0.788314	0.654784
4603	Regions/COXKO	14793.7	13422.2	0		0.94661	1.47748	0.321769	1.07476	1.05911	1.08278	1.08419	0.702875	2.30818	1.20983	0.788314	0.654784
4604	Regions/COXKO	14873.7	13422.2	0		0.94661	1.47748	0.321769	1.07476	1.05911	1.08278	1.08419	0.702875	2.30818	1.20983	0.788314	0.654784
4605	Regions/COXKO	14953.7	13422.2	0		0.89754	1.20184	0.0114984	1.07476	28.4891	0.0366643	1.08419	0.8485	3.04039	1.20983	0.371489	0.0176539
4606	Regions/COXKO	15033.7	13422.2	0		0.665491	0.84637	0.0132253	1.07476	1.93403	0.0490991	0.0635867	1.18385	3.32444	1.20983	0.485522	0.0252299
4607	Regions/COXKO	15113.7	13422.2	0		0.747916	0.970855	0.116807	0.775548	1.23248	0.23997	0.295862	1.09267	2.31346	0.68269	0.618081	0.183263
4608	Regions/COXKO	15193.7	13422.2	0		0.76456	0.945341	0.103475	0.886177	1.33789	0.181838	0.189588	1.13229	2.83076	0.72051	0.517422	0.156516
4609	Regions/COXKO	15273.7	13422.2	0		0.766808	1.10308	0.108474	1.1369	1.417	0.215296	0.217962	1.0147	2.8119	0.0577309	0.481822	0.179281
4610	Regions/COXKO	15353.7	13422.2	0		0.654288	0.902455	0.0938989	0.585893	1.32681	0.24506	0.296111	1.12791	3.0342	0.037248	0.692282	0.165503
4611	Regions/COXKO	15433.7	13422.2	0		0.65306	1.06257	0.235391	1.11156	2.44829	0.0333884	0.032441	1.01886	2.2968	0.074161	0.427757	0.186163
4612	Regions/COXKO	15513.7	13422.2	0		0.709689	0.84861	0.127705	0.819458	1.16446	0.177356	0.176364	1.31559	2.92509	0.443438	0.685749	0.191411
4613	Regions/COXKO	15593.7	13422.2	0		0.710719	0.870662	0.138843	1.27687	1.44489	0.0248404	0.0248462	1.3905	3.19419	0.861416	0.626549	0.203276
4614	Regions/COXKO	15673.7	13422.2	0		0.94661	1.47748	0.321769	1.07476	1.05911	1.08278	1.08419	0.702875	2.30818	1.20983	0.788314	0.654784
4615	Regions/COXKO	15753.7	13422.2	0		0.0371491	0.986717	0.0457876	1.07476	1.05911	1.08278	1.08419	1.13338	34.3229	1.20983	0.0493135	0.0409604
4616	Regions/COXKO	15833.7	13422.2	0		0.975738	1.1406	0.0823984	0.0589542	1.4986	0.0428637	0.0552991	0.995808	3.69281	0.0663637	0.953215	0.0205209
4617	Regions/COXKO	15913.7	13422.2	0		0.754355	1.00408	0.14308	0.859744	1.72302	0.029326	0.0357614	1.36178	4.39278	0.0832756	0.82485	0.175469
4618	Regions/COXKO	15993.7	13422.2	0		0.6162	0.837299	0.121186	0.979715	1.44912	0.190002	0.151244	1.46309	3.41673	0.58824	0.909209	0.235789
4619	Regions/COXKO	16073.7	13422.2	0		0.760349	1.07538	0.103731	1.49754	1.7229	0.257446	0.295615	1.08254	3.59191	0.0933639	0.613093	0.202187
4620	Regions/COXKO	16153.7	13422.2	0		0.709446	0.966903	0.139492	1.44922	1.61244	0.218294	0.261562	1.29448	3.01049	0.60962	0.669078	0.227241
4621	Regions/COXKO	16233.7	13422.2	0		0.661606	0.851309	0.155811	0.0552012	1.39181	0.377525	0.40599	1.36423	2.92209	0.699582	0.713703	0.0121611
4622	Regions/COXKO	16313.7	13422.2	0		0.656179	0.703747	0.105178	0.864323	1.54001	0.199233	0.193563	1.42307	3.24039	0.408394	0.813052	0.217404
4623	Regions/COXKO	16393.7	13422.2	0		0.787784	0.868121	0.142165	0.596814	1.41418	0.175846	0.1762	1.4551	3.00902	0.0377124	0.866381	0.169645
4624	Regions/COXKO	16473.7	13422.2	0		0.774052	1.05909	0.076652	0.78759	1.28605	0.0274875	0.0307038	1.18852	3.67178	0.0749788	0.697998	0.155985
4625	Regions/COXKO	16553.7	13422.2	0		0.94661	1.47748	0.321769	1.07476	1.05911	1.08278	1.08419	0.702875	25.1539	1.20983	0.788314	0.654784
4643	Regions/COXKO	13593.7	13342.2	0		0.642942	1.05758	0.126759	0.939764	1.63183	0.329934	0.298921	1.00005	3.11542	0.590442	0.623543	0.203604
4644	Regions/COXKO	13673.7	13342.2	0		0.671427	1.12138	0.156589	1.15207	1.52905	0.247428	0.260935	0.960049	3.07672	0.0572611	0.60364	0.216453
4645	Regions/COXKO	13753.7	13342.2	0		0.61795	0.759453	0.108601	1.04798	1.30091	0.146375	0.154714	1.40992	3.21351	0.33737	0.877244	0.264524
4646	Regions/COXKO	13833.7	13342.2	0		0.742224	0.791235	0.119671	0.953444	1.40672	0.146586	0.127029	1.27862	2.78708	0.734406	0.847391	0.20971
4647	Regions/COXKO	13913.7	13342.2	0		0.598977	0.703245	0.0922088	0.912324	1.68299	0.195219	0.170436	1.28393	2.73118	0.544029	0.689144	0.21622
4648	Regions/COXKO	13993.7	13342.2	0		0.646554	0.759285	0.0914525	0.880967	1.66336	0.220645	0.238287	1.20234	2.73233	0.478802	0.750805	0.212343
4649	Regions/COXKO	14073.7	13342.2	0		0.634625	1.06847	0.0694855	0.973149	1.24604	0.188438	0.36301	0.818103	2.41803	0.514379	0.691222	0.235439
4650	Regions/COXKO	14153.7	13342.2	0		0.637859	0.711883	0.109891	0.837661	1.40912	0.149095	0.148008	1.37334	3.08857	0.523994	0.79434	0.191984
4651	Regions/COXKO	14233.7	13342.2	0		0.698691	0.981063	0.142434	0.671275	1.33337	0.226335	0.346744	0.940414	2.23276	0.042558	0.57992	0.152393
4652	Regions/COXKO	14313.7	13342.2	0		0.790368	1.14417	0.116655	0.493683	1.24151	0.310986	0.436009	0.915589	2.08584	0.334655	0.564912	0.115513
4653	Regions/COXKO	14393.7	13342.2	0		0.596625	0.794353	0.11049	0.660978	1.47361	0.268922	0.330297	1.14408	2.30542	0.255732	0.592095	0.154793
4654	Regions/COXKO	14473.7	13342.2	0		0.94661	1.47748	0.321769	1.07476	1.05911	19.3743	19.3995	0.702875	2.30818	1.20983	0.788314	0.654784
4655	Regions/COXKO	14553.7	13342.2	0		0.716919	1.14304	0.164302	16.4287	1.57797	0.0347872	0.0706463	1.2679	3.15077	1.20983	0.497969	0.32001
4656	Regions/COXKO	14633.7	13342.2	0		0.798019	1.10456	0.115587	1.1371	2.06515	0.153115	0.185191	0.895397	3.33125	0.0720288	0.656824	0.1845
4657	Regions/COXKO	14713.7	13342.2	0		0.775608	0.982877	0.120341	1.18528	1.75185	0.243031	0.264008	1.00583	3.4575	0.696612	0.527481	0.208872
4658	Regions/COXKO	14793.7	13342.2	0		0.866931	1.22831	0.116983	20.4852	1.19226	0.0330594	0.029077	0.965087	3.10505	1.20983	0.784666	0.287538
4659	Regions/COXKO	14873.7	13342.2	0		0.849382	1.25562	0.0136492	1.07476	0.0605244	1.08278	1.08419	0.894082	2.11535	1.20983	0.0478771	0.0397674
4660	Regions/COXKO	14953.7	13342.2	0		0.498096	1.23923	0.00520859	1.07476	1.47257	0.0297135	1.08419	0.573674	2.10031	1.20983	0.468209	0.0143461
4661	Regions/COXKO	15033.7	13342.2	0		0.571787	1.27024	0.0859759	1.1179	1.2426	0.345832	0.722746	0.660834	1.72346	0.642286	0.544094	0.166971
4662	Regions/COXKO	15113.7	13342.2	0		0.5536	1.06159	0.0917106	0.562868	1.20121	0.232408	0.417442	0.729499	2.11337	0.368808	0.640133	0.125096
4663	Regions/COXKO	15193.7	13342.2	0		0.832635	1.01154	0.123067	1.08268	1.32609	0.30101	0.376991	0.961702	2.78733	0.0648718	0.4852	0.16264
4664	Regions/COXKO	15273.7	13342.2	0		0.685163	0.70313	0.0788799	0.812798	1.4703	0.188703	0.175729	1.36537	3.072	0.63835	0.830805	0.191834
4665	Regions/COXKO	15353.7	13342.2	0		0.689622	0.777984	0.0979279	0.732696	1.30435	0.183068	0.128974	1.32089	2.80458	0.451763	0.76008	0.212877
4666	Regions/COXKO	15433.7	13342.2	0		0.677825	0.846987	0.0959501	0.796139	1.38852	0.221797	0.180194	1.25505	3.63578	0.383471	0.715719	0.219547
4667	Regions/COXKO	15513.7	13342.2	0		0.724498	1.0707	0.137877	1.03207	1.52733	0.0425368	0.0344486	1.06395	2.82524	0.71846	0.785403	0.219339
4668	Regions/COXKO	15593.7	13342.2	0		0.657858	0.790754	0.104736	0.508123	1.34873	0.173536	0.160895	1.49324	3.12634	0.425395	0.792608	0.140471
4669	Regions/COXKO	15673.7	13342.2	0		0.715668	1.38234	0.129122	0.871488	1.45773	0.161163	0.183914	0.896716	3.31282	0.0745772	0.419452	0.131856
4670	Regions/COXKO	15753.7	13342.2	0		0.601672	0.893052	0.161433	17.4536	1.6311	0.0518534	0.0591363	1.45646	2.86569	1.20983	0.747456	0.340752
4671	Regions/COXKO	15833.7	13342.2	0		0.660462	0.90115	0.140637	0.961672	1.60084	0.0258529	0.032512	1.24005	2.89632	0.0697073	0.734168	0.182779
4672	Regions/COXKO	15913.7	13342.2	0		0.788117	0.789174	0.113701	0.95796	1.43757	0.21506	0.240591	1.60052	3.42849	0.45695	0.949277	0.234955
4673	Regions/COXKO	15993.7	13342.2	0		0.740391	0.7788	0.110539	1.16915	1.55961	0.212317	0.240134	1.26047	2.853	0.457893	0.613606	0.256502
4674	Regions/COXKO	16073.7	13342.2	0		0.629655	0.751338	0.0872694	1.00115	1.50094	0.273338	0.27271	1.39876	3.39535	0.487529	0.705478	0.252424
4675	Regions/COXKO	16153.7	13342.2	0		0.618151	0.620473	0.0941985	0.785621	1.42333	0.148662	0.153241	1.88007	4.10842	0.437035	1.0636	0.255184
4676	Regions/COXKO	16233.7	13342.2	0		0.657956	0.814475	0.0822115	0.955224	1.25227	0.0173839	0.0195509	1.2467	2.83176	0.412112	0.660726	0.22737
4677	Regions/COXKO	16313.7	13342.2	0		0.706633	0.745532	0.12442	0.868992	1.48913	0.226072	0.22787	1.5747	3.18921	0.0515106	0.816038	0.182115
4678	Regions/COXKO	16393.7	13342.2	0		0.815232	1.07829	0.0936722	0.937802	1.62582	0.0199699	0.0233092	1.20119	3.82752	0.59464	0.835767	0.20028
4679	Regions/COXKO	16473.7	13342.2	0		0.94661	1.47748	0.321769	1.07476	1.05911	1.08278	1.08419	0.702875	2.30818	1.20983	0.788314	0.654784
4699	Regions/COXKO	13673.7	13262.2	0		0.644953	1.02775	0.0804022	1.28849	1.28885	0.0328642	0.0322984	0.977778	2.82006	0.647646	0.698399	0.290915
4700	Regions/COXKO	13753.7	13262.2	0		0.688445	0.662882	0.101784	1.02776	1.56817	0.209904	0.262863	1.46883	3.38459	0.605711	0.852912	0.222453
4701	Regions/COXKO	13833.7	13262.2	0		0.602375	0.779641	0.0957052	0.905223	1.55085	0.211031	0.228719	1.15885	3.48978	0.0424948	0.718108	0.213602
4702	Regions/COXKO	13913.7	13262.2	0		0.658127	0.812752	0.109516	1.0566	1.41564	0.21772	0.199832	1.35583	2.84532	0.724077	0.831858	0.229721
4703	Regions/COXKO	13993.7	13262.2	0		0.58698	0.712338	0.102929	1.05651	1.81435	0.287372	0.244802	1.27271	2.84392	0.56048	0.584724	0.206281
4704	Regions/COXKO	14073.7	13262.2	0		0.646437	0.711633	0.111051	0.950353	1.522	0.192398	0.16726	1.30129	2.94599	0.514923	0.955746	0.278356
4705	Regions/COXKO	14153.7	13262.2	0		0.559216	0.858383	0.0970606	0.635409	1.59792	0.378262	0.326546	1.08683	2.54145	0.541252	0.59958	0.136655
4706	Regions/COXKO	14233.7	13262.2	0		0.572331	0.908129	0.157169	0.0488084	2.04879	0.507538	0.877715	0.82382	2.51782	0.0549428	0.486428	0.0121644
4707	Regions/COXKO	14313.7	13262.2	0		0.545897	1.01604	0.101721	0.86906	1.35283	0.027329	0.0677799	0.715961	1.73551	0.0536948	0.704947	0.247916
4708	Regions/COXKO	14393.7	13262.2	0		0.570727	0.852595	0.129359	0.927776	1.48696	0.320667	0.394578	0.933219	2.53643	0.0635637	0.657226	0.180422
4709	Regions/COXKO	14473.7	13262.2	0		0.628867	0.984613	0.0132416	1.07476	0.0449837	1.08278	1.08419	0.900537	2.44703	1.20983	0.459404	0.0213188
4710	Regions/COXKO	14553.7	13262.2	0		0.761988	1.31467	0.135231	12.3139	1.95001	0.0435978	0.0473789	0.874444	3.02805	1.20983	0.499637	0.168192
4711	Regions/COXKO	14633.7	13262.2	0		0.676417	0.810005	0.107912	0.919421	1.45217	0.181835	0.179651	1.27578	3.10671	0.607713	0.887591	0.252034
4712	Regions/COXKO	14713.7	13262.2	0		0.650027	0.74982	0.114395	1.02038	1.68622	0.238618	0.1986	1.40599	3.60017	0.460409	0.894428	0.264311
4713	Regions/COXKO	14793.7	13262.2	0		0.799226	1.14567	0.14029	1.67756	1.87934	0.0249841	0.0384977	0.8619	2.72524	0.0773619	0.542406	0.359275
4714	Regions/COXKO	14873.7	13262.2	0		0.66166	1.44487	0.00830249	1.07476	1.22236	0.034825	0.0602659	0.567549	1.70463	1.20983	0.699323	0.0200727
4715	Regions/COXKO	14953.7	13262.2	0		0.492914	1.03271	0.067447	0.482841	0.877336	0.272141	0.748802	0.706807	1.64321	0.350006	0.712549	0.137272
4716	Regions/COXKO	15033.7	13262.2	0		0.597156	1.60593	0.0975018	14.9388	1.24901	0.267599	0.67084	0.494591	1.66155	1.20983	0.337948	0.148498
4717	Regions/COXKO	15113.7	13262.2	0		0.465082	1.19098	0.0837559	0.624807	1.00705	0.276032	0.765654	0.669037	1.90133	0.314533	0.590047	0.160685
4718	Regions/COXKO	15193.7	13262.2	0		0.50669	1.33723	0.129396	1.07476	1.36236	0.348497	0.51836	0.758669	1.84524	1.20983	0.535752	0.0125751
4719	Regions/COXKO	15273.7	13262.2	0		0.691006	0.823066	0.0873511	0.642794	1.51677	0.0281918	0.0268371	1.29239	2.5544	0.0407985	0.71286	0.213812
4720	Regions/COXKO	15353.7	13262.2	0		0.617042	0.747849	0.114849	0.946687	1.47551	0.205215	0.142922	1.39141	3.07623	0.535955	0.834579	0.26814
4721	Regions/COXKO	15433.7	13262.2	0		0.69343	0.831671	0.106994	1.05823	1.20459	0.310202	0.266184	1.30003	2.85901	0.360278	0.721862	0.237378
4722	Regions/COXKO	15513.7	13262.2	0		0.727112	0.771646	0.101378	1.02746	1.42556	0.129482	0.135663	1.45185	3.58448	0.539362	0.851461	0.228587
4723	Regions/COXKO	15593.7	13262.2	0		0.805769	1.32302	0.00754839	1.07476	1.68234	0.0440908	0.0474417	0.944838	2.40392	1.20983	0.603415	0.0172628
4724	Regions/COXKO	15673.7	13262.2	0		0.94661	1.47748	0.321769	1.07476	1.05911	1.08278	1.08419	0.702875	2.30818	1.20983	0.788314	0.654784
4725	Regions/COXKO	15753.7	13262.2	0		0.603185	0.916837	0.145031	1.07476	1.62897	0.0693072	0.0678886	1.23666	2.8636	12.0866	0.653701	0.0225596
4726	Regions/COXKO	15833.7	13262.2	0		0.94661	1.47748	0.321769	1.07476	1.05911	1.08278	1.08419	0.702875	2.30818	1.20983	0.788314	0.654784
4727	Regions/COXKO	15913.7	13262.2	0		0.912191	1.47947	0.142672	1.01036	1.25909	0.285883	0.402015	0.833988	2.92068	0.101275	0.607037	0.168012
4728	Regions/COXKO	15993.7	13262.2	0		0.655057	0.963897	0.101552	0.811123	1.73572	0.280095	0.238785	1.17545	2.71327	0.494661	0.554276	0.135257
4729	Regions/COXKO	16073.7	13262.2	0		0.715514	0.81664	0.14624	0.671399	1.03044	0.0280629	0.0305416	1.32019	2.90004	0.0375791	0.555325	0.196859
4730	Regions/COXKO	16153.7	13262.2	0		0.699749	0.793014	0.111288	0.905465	1.452	0.139509	0.119492	1.36357	2.78684	0.64349	0.712008	0.183062
4731	Regions/COXKO	16233.7	13262.2	0		0.78422	0.888089	0.121606	0.711016	1.38066	0.173987	0.192864	1.35554	3.19982	0.439053	0.817082	0.168382
4732	Regions/COXKO	16313.7	13262.2	0		0.725042	1.01545	0.1479	0.969893	1.1921	0.0335199	0.0408946	1.08119	2.81983	0.0773406	0.686798	0.199111
4733	Regions/COXKO	16393.7	13262.2	0		0.640187	0.748704	0.0905973	0.0625291	1.32654	0.0368416	0.0297217	1.39532	3.08987	0.0703879	1.20739	0.0196573
4734	Regions/COXKO	16473.7	13262.2	0		0.94661	1.47748	0.321769	1.07476	1.05911	1.08278	1.08419	0.702875	2.30818	1.20983	0.788314	0.654784
4753	Regions/COXKO	13673.7	13182.2	0		0.756809	1.21935	0.0997966	1.11338	1.44754	0.180356	0.244152	1.08753	4.48036	0.787808	0.610162	0.138969
4754	Regions/COXKO	13753.7	13182.2	0		0.597313	1.06015	0.152684	14.3247	1.79787	0.0385663	0.0387477	1.04949	2.14113	1.20983	0.951247	0.276171
4755	Regions/COXKO	13833.7	13182.2	0		0.715094	0.979637	0.107485	0.852664	1.75966	0.278436	0.240469	1.17714	3.02245	0.820853	0.669027	0.188047
4756	Regions/COXKO	13913.7	13182.2	0		0.64881	0.800644	0.113822	1.36542	1.57098	0.364812	0.299224	1.50474	3.08582	0.0619913	0.702561	0.265822
4757	Regions/COXKO	13993.7	13182.2	0		0.605514	0.684954	0.102246	0.895972	1.7292	0.239638	0.227779	1.43284	3.40962	0.483033	0.938093	0.265937
4758	Regions/COXKO	14073.7	13182.2	0		0.624053	0.819971	0.106994	0.838048	1.4524	0.152668	0.142189	1.17197	2.92048	0.50467	0.917357	0.266068
4759	Regions/COXKO	14153.7	13182.2	0		0.618002	0.834748	0.0759476	0.693281	1.20024	0.18758	0.309043	1.02528	2.54294	0.619552	0.976395	0.222981
4760	Regions/COXKO	14233.7	13182.2	0		0.663365	0.856735	0.00663152	0.56793	1.70374	0.0342222	0.0289168	1.06772	3.26497	0.0464836	0.616704	0.164579
4761	Regions/COXKO	14313.7	13182.2	0		0.5314	0.792066	0.105817	0.879385	1.35423	0.271886	0.379125	1.04018	2.09908	0.0481501	0.744434	0.209948
4762	Regions/COXKO	14393.7	13182.2	0		0.514296	0.713046	0.0997982	0.920158	1.37923	0.0394102	0.0372667	1.18753	2.70977	0.0557365	0.751244	0.259184
4763	Regions/COXKO	14473.7	13182.2	0		0.751063	0.967635	0.1159	1.07476	1.98493	0.0422534	0.0691032	1.01189	2.86276	1.20983	0.913889	0.0208635
4764	Regions/COXKO	14553.7	13182.2	0		0.613551	0.680336	0.0730412	0.96956	1.53629	0.267503	0.213978	1.52964	3.2303	0.444272	0.921551	0.290977
4765	Regions/COXKO	14633.7	13182.2	0		0.617463	0.775564	0.0983971	0.862877	1.32285	0.0317186	0.0374314	1.28379	3.23799	0.0638021	1.04621	0.244066
4766	Regions/COXKO	14713.7	13182.2	0		0.688334	1.01276	0.145856	0.994503	2.05166	0.0272641	0.0438909	1.05703	2.74913	0.504622	0.772727	0.302528
4767	Regions/COXKO	14793.7	13182.2	0		0.661168	0.6436	0.108034	1.33353	1.50408	0.350904	0.294723	1.42467	2.71305	0.653228	0.88866	0.279087
4768	Regions/COXKO	14873.7	13182.2	0		0.530667	1.02648	0.0693886	0.681576	1.1077	0.204486	0.520585	0.834555	1.98984	0.459091	0.675825	0.125006
4769	Regions/COXKO	14953.7	13182.2	0		0.49075	1.18852	0.06412	0.528499	1.11563	0.00851408	0.0241117	0.662937	1.87536	0.480441	0.758755	0.135506
4770	Regions/COXKO	15033.7	13182.2	0		0.467933	1.11197	0.0732563	0.54178	0.81742	0.222	0.689824	0.622638	1.7639	0.0330339	0.646785	0.155438
4771	Regions/COXKO	15113.7	13182.2	0		0.4831	1.0736	0.0655478	0.453515	0.974974	0.241814	0.686477	0.759737	1.50944	0.42722	0.610485	0.106289
4772	Regions/COXKO	15193.7	13182.2	0		0.499574	1.27323	0.0686296	0.694945	0.909232	0.341689	0.916403	0.593631	1.48654	0.545929	0.521197	0.153013
4773	Regions/COXKO	15273.7	13182.2	0		0.467398	1.00551	0.0679527	0.432473	0.877845	0.289984	0.72304	0.725438	1.85505	0.280625	0.88443	0.177697
4774	Regions/COXKO	15353.7	13182.2	0		0.633505	0.82049	0.111926	0.777968	1.50904	0.258667	0.242005	1.24197	2.95679	0.0406194	0.838557	0.200497
4775	Regions/COXKO	15433.7	13182.2	0		0.706486	0.961446	0.118861	0.961718	1.38828	0.181582	0.171453	1.0914	3.01019	0.453331	0.626496	0.246273
4776	Regions/COXKO	15513.7	13182.2	0		0.83292	1.92681	0.136321	0.0647461	1.29829	0.0489141	0.0569084	0.526604	2.50657	0.0728835	0.433366	0.0164278
4777	Regions/COXKO	15593.7	13182.2	0		0.683038	0.920915	0.133727	1.03021	1.698	0.330296	0.457231	1.28315	3.37876	0.0613054	1.11085	0.287816
4778	Regions/COXKO	15673.7	13182.2	0		0.697383	1.07113	0.1084	16.831	1.11003	0.369693	0.52635	1.10387	3.72267	1.20983	0.680503	0.267211
4780	Regions/COXKO	15833.7	13182.2	0		0.94661	1.47748	0.321769	1.07476	1.05911	1.08278	1.08419	0.702875	2.30818	1.20983	0.788314	0.654784
4781	Regions/COXKO	15913.7	13182.2	0		1.21439	1.1006	0.0210161	1.07476	17.8732	0.0627637	1.08419	1.2894	4.23638	1.20983	0.84725	0.0340612
4782	Regions/COXKO	15993.7	13182.2	0		0.645052	0.854115	0.127736	0.812757	1.25312	0.138264	0.151105	1.4102	3.19148	0.504569	0.601443	0.166631
4783	Regions/COXKO	16073.7	13182.2	0		0.727284	1.06601	0.11477	1.01673	1.33802	0.205694	0.194077	1.17234	3.02348	0.63435	0.487739	0.158862
4784	Regions/COXKO	16153.7	13182.2	0		0.928562	1.04981	0.130069	1.21579	1.48816	0.262093	0.292226	1.09197	2.88261	0.570583	0.491062	0.159595
4785	Regions/COXKO	16233.7	13182.2	0		0.771091	0.986053	0.108092	1.01455	1.2614	0.137272	0.149965	1.25923	3.27885	0.458138	0.591848	0.155099
4786	Regions/COXKO	16313.7	13182.2	0		0.746244	0.837238	0.0919062	0.822261	1.3107	0.128907	0.136128	1.58698	3.38726	0.501123	0.947863	0.19586
4787	Regions/COXKO	16393.7	13182.2	0		0.81353	0.962922	0.155783	0.590942	1.25245	0.178392	0.216576	1.29257	3.91287	0.0449409	0.748497	0.146297
4808	Regions/COXKO	13833.7	13102.2	0		0.94661	1.47748	0.321769	1.07476	1.05911	1.08278	1.08419	0.702875	2.30818	1.20983	0.788314	0.654784
4809	Regions/COXKO	13913.7	13102.2	0		0.687041	0.876255	0.115123	1.04866	1.46859	0.0258303	0.0279429	1.43255	3.47496	0.796629	0.849577	0.193324
4810	Regions/COXKO	13993.7	13102.2	0		0.710773	0.807735	0.116224	1.09649	1.68074	0.231097	0.221728	1.27986	3.40617	0.61178	0.684142	0.218889
4811	Regions/COXKO	14073.7	13102.2	0		0.616457	0.74065	0.102347	0.666946	1.55918	0.214297	0.198134	1.54352	3.58734	0.530044	0.853094	0.165024
4812	Regions/COXKO	14153.7	13102.2	0		0.57186	1.07639	0.123529	1.43712	1.38884	0.0283284	0.0345321	0.912647	1.98063	0.0845156	0.437327	0.2051
4813	Regions/COXKO	14233.7	13102.2	0		0.596229	0.821095	0.119739	0.590644	1.3589	0.292018	0.452144	1.11236	2.97828	0.0346322	0.763496	0.174287
4814	Regions/COXKO	14313.7	13102.2	0		0.604209	0.719401	0.0793802	0.566342	1.53233	0.191273	0.310838	1.10832	2.50395	0.40824	0.793857	0.182736
4815	Regions/COXKO	14393.7	13102.2	0		0.583266	0.948725	0.10262	0.899132	1.74203	0.398381	0.536574	0.946236	2.57765	0.433385	0.702358	0.222783
4816	Regions/COXKO	14473.7	13102.2	0		0.602332	0.766198	0.093534	0.742449	1.94554	0.0237799	0.0276786	1.23785	3.40998	0.0489214	0.974753	0.240347
4817	Regions/COXKO	14553.7	13102.2	0		0.698941	0.821916	0.123109	0.453826	1.49133	0.0261974	0.0301809	1.19966	3.23914	0.0454866	0.719067	0.143906
4818	Regions/COXKO	14633.7	13102.2	0		0.690793	1.49379	0.16406	1.07476	22.8533	0.618038	0.560499	0.77703	3.44627	1.20983	0.388555	0.0201354
4819	Regions/COXKO	14713.7	13102.2	0		0.94661	1.47748	0.321769	1.07476	1.05911	1.08278	1.08419	0.702875	2.30818	1.20983	0.788314	0.654784
4820	Regions/COXKO	14793.7	13102.2	0		0.654062	1.01185	0.122161	1.2049	1.44849	0.0295709	0.036512	1.029	2.96416	0.0708405	0.730198	0.262608
4821	Regions/COXKO	14873.7	13102.2	0		0.495625	0.941695	0.0872769	0.532042	1.17961	0.215822	0.387549	0.915346	2.34183	0.412548	0.662067	0.115889
4822	Regions/COXKO	14953.7	13102.2	0		0.489227	1.12664	0.0549103	0.601578	0.939174	0.181512	0.467046	0.67838	1.69111	0.479261	0.679197	0.125948
4823	Regions/COXKO	15033.7	13102.2	0		0.521408	1.08949	0.0690871	0.828837	0.853872	0.251599	0.63345	0.622768	1.52928	0.440647	0.597548	0.158824
4824	Regions/COXKO	15113.7	13102.2	0		0.419387	1.17049	0.00788211	1.07476	1.05911	0.039078	1.08419	0.592562	1.72407	1.20983	0.639099	0.0245944
4825	Regions/COXKO	15193.7	13102.2	0		0.408825	0.974052	0.0503469	0.548498	0.983693	0.242541	0.709574	0.699177	1.63788	0.614744	0.874869	0.153855
4826	Regions/COXKO	15273.7	13102.2	0		0.469463	0.925511	0.0738817	0.629273	0.830852	0.188083	0.353368	0.836785	1.96629	0.278209	0.747144	0.192675
4827	Regions/COXKO	15353.7	13102.2	0		0.644903	1.06173	0.149112	1.07723	1.43733	0.02065	0.02522	0.84206	2.79924	0.0497649	0.488406	0.221224
4828	Regions/COXKO	15433.7	13102.2	0		0.644997	0.997593	0.142362	1.54059	1.75761	0.502407	0.395509	0.992552	2.63741	0.90106	0.54607	0.253457
4829	Regions/COXKO	15513.7	13102.2	0		0.62306	0.8501	0.120588	1.36607	1.23821	0.501019	0.466077	1.24672	3.38703	0.0655502	0.746936	0.305848
4830	Regions/COXKO	15593.7	13102.2	0		0.480958	1.0083	0.0121802	1.07476	29.6319	1.08278	1.08419	1.04699	81.8569	1.20983	0.788314	0.654784
4831	Regions/COXKO	15673.7	13102.2	0		0.94661	1.2954	0.030384	1.07476	1.05911	1.08278	1.08419	0.759593	24.7739	1.20983	0.788314	0.654784
4834	Regions/COXKO	15913.7	13102.2	0		0.94661	1.47748	0.321769	1.07476	1.05911	1.08278	1.08419	0.702875	2.30818	1.20983	0.788314	0.654784
4835	Regions/COXKO	15993.7	13102.2	0		0.731322	0.822817	0.116956	2.01422	1.55956	0.266143	0.325594	1.42823	3.75796	0.0824447	0.690163	0.260434
4836	Regions/COXKO	16073.7	13102.2	0		0.688348	0.741813	0.113153	1.06153	1.37778	0.0177244	0.0152922	1.58642	3.6038	0.568167	0.737117	0.229199
4837	Regions/COXKO	16153.7	13102.2	0		0.680837	0.78181	0.108819	0.764991	1.36577	0.163212	0.160457	1.59833	3.18944	0.358135	0.663091	0.159466
4838	Regions/COXKO	16233.7	13102.2	0		0.732146	0.809934	0.117486	0.763191	1.10467	0.168172	0.175276	1.52611	3.66316	0.595793	0.823587	0.171723
4839	Regions/COXKO	16313.7	13102.2	0		0.833902	0.870481	0.125565	0.71579	1.26284	0.169384	0.181955	1.38706	3.7709	0.0459031	0.854091	0.170119
4875	Regions/COXKO	14953.7	13022.2	0		0.579979	0.909288	0.0976647	0.848828	1.61777	0.22531	0.319849	0.965672	2.62771	0.659475	0.669676	0.203941
4876	Regions/COXKO	15033.7	13022.2	0		0.492659	0.998029	0.0902696	0.421648	0.954104	0.297422	0.681548	0.733018	1.63719	0.0311745	0.673366	0.120486
4877	Regions/COXKO	15113.7	13022.2	0		0.460922	1.22872	0.00601111	1.07476	1.11766	0.0239082	1.08419	0.529297	1.62885	1.20983	0.777984	0.022958
4878	Regions/COXKO	15193.7	13022.2	0		0.527922	1.12273	0.0726931	0.58399	0.930889	0.264167	0.567926	0.657749	1.76198	0.37024	0.634044	0.154862
4879	Regions/COXKO	15273.7	13022.2	0		0.508867	0.835992	0.08393	0.659776	1.29761	0.342747	0.709724	0.849709	1.73896	0.0334389	0.777186	0.234356
4880	Regions/COXKO	15353.7	13022.2	0		0.575908	0.71146	0.079823	0.93561	1.04632	0.0231729	0.0230637	1.20326	2.26839	0.498836	0.867671	0.276655
4881	Regions/COXKO	15433.7	13022.2	0		0.646095	0.727332	0.0883746	0.687116	1.56612	0.242096	0.26427	1.25679	3.12217	0.623539	0.781426	0.186071
4882	Regions/COXKO	15513.7	13022.2	0		0.612374	0.866063	0.107575	1.04796	1.17038	0.1775	0.177571	0.959224	2.43981	0.476741	0.621542	0.246284
4883	Regions/COXKO	15593.7	13022.2	0		0.588039	0.821205	0.109316	1.81898	1.49006	0.26586	0.264336	1.19884	2.95257	0.935436	0.723737	0.264056
4884	Regions/COXKO	15673.7	13022.2	0		0.396563	1.00643	0.0950946	0.721339	1.17152	0.163876	0.302762	0.864999	2.06464	0.351581	0.836645	0.167857
4885	Regions/COXKO	15753.7	13022.2	0		0.0234041	0.772524	0.0202737	1.07476	24.3051	1.08278	1.08419	0.825005	39.452	1.20983	0.788314	0.654784
4888	Regions/COXKO	15993.7	13022.2	0		0.638699	0.671955	0.072127	1.18276	1.5695	0.153068	0.131934	1.7053	4.29844	0.612268	1.05197	0.291466
4889	Regions/COXKO	16073.7	13022.2	0		0.847841	1.09324	0.11971	0.762556	1.44205	0.0237162	0.0273085	1.04557	3.25314	0.509719	0.814539	0.238977
4890	Regions/COXKO	16153.7	13022.2	0		0.709752	0.89943	0.125049	1.09476	1.13029	0.0260261	0.0318174	1.5271	3.12265	0.0590784	0.953942	0.289356
4891	Regions/COXKO	16233.7	13022.2	0		0.708719	1.03095	0.136528	0.791139	1.40084	0.217357	0.215568	1.50462	4.10844	0.075947	0.799119	0.171082
4928	Regions/COXKO	15033.7	12942.2	0		0.564717	0.889147	0.108896	0.767843	1.55603	0.247683	0.326996	1.05017	2.37146	0.594268	0.73641	0.185535
4929	Regions/COXKO	15113.7	12942.2	0		0.570829	1.06925	0.113784	1.26897	1.55194	0.0244334	0.0398507	0.883947	2.49745	0.0818025	0.910073	0.258614
4930	Regions/COXKO	15193.7	12942.2	0		0.632146	0.870745	0.0068685	0.0567093	1.76173	0.0304123	0.0649039	1.10873	2.37253	0.0638367	0.544078	0.0114723
4931	Regions/COXKO	15273.7	12942.2	0		0.61042	0.821052	0.104111	0.802177	1.34135	0.162208	0.235825	1.05036	2.60006	0.308878	0.679854	0.198385
4932	Regions/COXKO	15353.7	12942.2	0		0.634077	0.972451	0.147903	0.891045	1.49112	0.402458	0.475201	0.932307	2.18499	0.0420402	0.756179	0.253032
4933	Regions/COXKO	15433.7	12942.2	0		0.575068	0.874167	0.0967414	0.593932	1.21796	0.310776	0.296045	1.03079	2.27384	0.347606	0.736059	0.182852
4934	Regions/COXKO	15513.7	12942.2	0		0.610412	0.760842	0.0840771	0.737258	1.41956	0.244572	0.29132	1.34954	2.84451	0.728362	0.954688	0.209906
4935	Regions/COXKO	15593.7	12942.2	0		0.579171	0.837106	0.113578	0.890755	1.12333	0.44849	0.688013	1.04831	2.06237	0.550414	0.771158	0.23269
4936	Regions/COXKO	15673.7	12942.2	0		0.491246	0.941894	0.114748	0.942801	1.21593	0.197343	0.266077	0.90214	2.44035	0.613754	0.611946	0.20666
4937	Regions/COXKO	15753.7	12942.2	0		0.688232	1.01722	0.108688	0.763432	1.05816	0.274758	0.376737	1.06723	2.80006	0.41225	0.8886	0.248118
4941	Regions/COXKO	16073.7	12942.2	0		0.931651	0.889734	0.0359017	1.07476	1.05911	1.08278	1.08419	1.0062	26.7035	1.20983	0.788314	0.654784
4983	Regions/COXKO	15273.7	12862.2	0		0.492137	0.791789	0.123046	1.17456	1.22012	0.249059	0.465254	1.05505	2.48038	0.525428	0.759572	0.246119
4984	Regions/COXKO	15353.7	12862.2	0		0.510569	0.719157	0.067423	1.12984	1.53412	0.029641	0.0269977	1.27038	3.31128	0.0669343	0.800939	0.262316
4985	Regions/COXKO	15433.7	12862.2	0		0.60836	0.938461	0.135729	0.902017	1.83912	0.0261741	0.0306001	1.03923	2.93581	0.890155	0.674477	0.225444
4986	Regions/COXKO	15513.7	12862.2	0		0.673879	0.777937	0.0978699	0.958749	1.67181	0.185775	0.200249	1.30757	3.01431	0.553583	0.961242	0.26795
4987	Regions/COXKO	15593.7	12862.2	0		0.673288	0.91924	0.154879	0.821436	1.32036	0.0170331	0.0215831	1.13568	2.26081	0.589885	0.82533	0.267039
4988	Regions/COXKO	15673.7	12862.2	0		0.659849	1.12854	0.125736	1.07153	1.69579	0.0355305	0.0321375	0.994554	2.60581	0.0965151	0.728417	0.15558
4989	Regions/COXKO	15753.7	12862.2	0		0.641003	1.18195	0.125492	0.631739	0.927936	0.203058	0.326992	0.850597	2.32625	0.040993	0.747854	0.205939
10674	Regions/COXKO	10833.7	15902.2	0		0.720111	0.944966	0.112474	0.721473	1.041	0.0299827	0.037403	1.19872	4.8169	0.0849726	1.18421	0.168463
10686	Regions/COXKO	10833.7	15822.2	0		0.697475	0.806362	0.110607	0.827591	1.5208	0.1678	0.179502	1.28759	3.11306	0.470955	0.412149	0.0861766
10687	Regions/COXKO	10913.7	15822.2	0		0.817987	0.847331	0.0972535	0.626302	1.20052	0.11572	0.124599	1.40016	4.40364	0.0779727	0.349805	0.047833
10688	Regions/COXKO	10993.7	15822.2	0		0.652633	0.971387	0.157385	0.784506	1.23918	0.324945	0.4233	1.05469	3.22949	0.0617865	0.582153	0.181874
10699	Regions/COXKO	10833.7	15742.2	0		0.675239	0.817641	0.111101	0.966804	1.20899	0.195706	0.221177	1.23744	3.11175	0.509552	0.437487	0.110478
10700	Regions/COXKO	10913.7	15742.2	0		0.756546	0.876247	0.135416	0.709486	1.24125	0.181929	0.214459	1.12373	3.36196	0.0446813	0.513808	0.119695
10701	Regions/COXKO	10993.7	15742.2	0		0.722534	0.683966	0.134149	1.24381	1.41346	0.17192	0.155877	1.50374	3.76993	0.0533606	0.667663	0.206842
10702	Regions/COXKO	11073.7	15742.2	0		0.692962	0.976835	0.132941	1.31828	1.43155	0.230227	0.243389	1.02761	3.40363	0.424962	0.551261	0.252284
10703	Regions/COXKO	11153.7	15742.2	0		0.62998	1.05139	0.111229	0.689293	1.09357	0.0417423	0.088288	1.08123	3.11967	0.075108	0.646429	0.20519
10713	Regions/COXKO	10753.7	15662.2	0		0.7977	0.904321	0.139396	0.791039	1.02241	0.198455	0.296565	1.28365	4.10565	0.412087	0.702291	0.159272
10714	Regions/COXKO	10833.7	15662.2	0		0.701018	0.831502	0.124417	0.69412	1.07242	0.161183	0.194916	1.2896	2.96425	0.658274	0.554719	0.122654
10715	Regions/COXKO	10913.7	15662.2	0		0.683339	0.840026	0.171041	0.69617	1.49347	0.272744	0.226254	1.28457	3.5062	0.0493345	0.605508	0.153612
10716	Regions/COXKO	10993.7	15662.2	0		0.569153	0.638491	0.115298	0.843481	1.60535	0.137385	0.137749	1.56161	3.84113	0.454417	0.768749	0.170771
10717	Regions/COXKO	11073.7	15662.2	0		0.707223	0.602072	0.0952023	0.839435	1.52955	0.217806	0.218021	1.63466	4.14785	0.369451	0.864804	0.219499
10718	Regions/COXKO	11153.7	15662.2	0		0.94661	1.47748	0.321769	1.07476	1.05911	1.08278	1.08419	0.702875	2.30818	1.20983	0.788314	0.654784
10719	Regions/COXKO	11233.7	15662.2	0		0.761058	0.912244	0.0193277	1.07476	1.05911	1.08278	1.08419	0.871664	2.30818	1.20983	0.788314	0.654784
10730	Regions/COXKO	10753.7	15582.2	0		0.79221	1.15046	0.017662	1.07476	1.05911	1.08278	1.08419	0.852576	69.3995	1.20983	0.951278	0.0460304
10731	Regions/COXKO	10833.7	15582.2	0		0.695254	0.866636	0.158759	0.949424	1.10485	0.269564	0.322938	1.16604	2.83506	0.0382571	0.54253	0.178989
10732	Regions/COXKO	10913.7	15582.2	0		0.708407	0.753331	0.144351	0.724451	1.30887	0.222137	0.248271	1.54114	3.79879	0.463604	0.786649	0.168622
10733	Regions/COXKO	10993.7	15582.2	0		0.564641	0.679495	0.145933	0.935678	1.32011	0.19327	0.168761	1.5002	3.41765	0.510493	0.748044	0.21488
10734	Regions/COXKO	11073.7	15582.2	0		0.663299	0.657758	0.141266	0.863697	1.51417	0.201291	0.185666	1.63602	4.25923	0.52294	0.633034	0.168062
10735	Regions/COXKO	11153.7	15582.2	0		0.670527	0.68597	0.0857295	1.03834	1.20175	0.190586	0.229065	1.44374	4.49478	0.691577	0.935155	0.222577
10736	Regions/COXKO	11233.7	15582.2	0		0.94661	1.47748	0.321769	1.07476	1.05911	1.08278	1.08419	0.702875	2.30818	1.20983	0.788314	0.654784
10737	Regions/COXKO	11313.7	15582.2	0		0.94661	1.47748	0.321769	1.07476	1.05911	1.08278	1.08419	0.702875	2.30818	1.20983	0.788314	0.654784
10749	Regions/COXKO	10753.7	15502.2	0		0.752333	0.912125	0.146768	0.850316	1.07371	0.212185	0.229873	1.11686	2.70484	0.0493436	0.418395	0.133727
10750	Regions/COXKO	10833.7	15502.2	0		0.563036	0.625933	0.109267	0.863342	1.11906	0.175998	0.143891	1.49698	2.9637	0.44706	0.776273	0.19396
10751	Regions/COXKO	10913.7	15502.2	0		0.693495	0.89828	0.113577	0.918551	1.35766	0.198146	0.18447	1.12842	3.17198	0.57659	0.423622	0.12111
10752	Regions/COXKO	10993.7	15502.2	0		0.655002	0.80395	0.159187	0.446912	1.10465	0.251452	0.258432	1.11006	3.08817	0.452582	0.560584	0.104734
10753	Regions/COXKO	11073.7	15502.2	0		0.617531	0.833723	0.128118	0.698151	1.39709	0.199872	0.165515	1.14431	3.66872	0.44837	0.533793	0.118031
10754	Regions/COXKO	11153.7	15502.2	0		0.593726	0.763401	0.131134	1.084	1.49377	0.145577	0.137619	1.50841	3.64957	0.571051	0.606485	0.139577
10755	Regions/COXKO	11233.7	15502.2	0		0.579631	0.661708	0.112991	0.751424	1.21017	0.286517	0.331459	1.56925	3.53337	0.567001	1.26115	0.276234
10756	Regions/COXKO	11313.7	15502.2	0		0.94661	1.47748	0.321769	1.07476	1.05911	1.08278	1.08419	0.702875	2.30818	1.20983	0.788314	0.654784
10757	Regions/COXKO	11393.7	15502.2	0		0.94661	0.684355	0.0383029	1.07476	1.05911	1.08278	1.08419	1.27388	29.9534	1.20983	0.788314	0.654784
10771	Regions/COXKO	10753.7	15422.2	0		0.633824	0.671814	0.122512	0.823968	1.26008	0.103836	0.117127	1.34676	3.37411	0.383286	0.622009	0.115548
10772	Regions/COXKO	10833.7	15422.2	0		0.560053	0.591231	0.0993964	1.0958	1.50753	0.247126	0.251352	1.41661	2.83782	0.440222	0.857712	0.261054
10773	Regions/COXKO	10913.7	15422.2	0		0.61161	0.591342	0.0712505	0.644441	1.29765	0.0153012	0.0124987	1.52989	3.38059	0.465264	0.607142	0.0756615
10774	Regions/COXKO	10993.7	15422.2	0		0.568444	0.686172	0.122931	0.741794	1.41526	0.18792	0.170289	1.40983	3.56889	0.492005	0.76179	0.167815
10775	Regions/COXKO	11073.7	15422.2	0		0.697316	0.640538	0.13272	0.738969	1.39191	0.205258	0.168552	1.5857	3.13372	0.496002	0.793978	0.196867
10776	Regions/COXKO	11153.7	15422.2	0		0.644551	0.590071	0.103893	0.826308	1.45241	0.189226	0.14586	1.88348	4.44583	0.445345	0.896797	0.141577
10777	Regions/COXKO	11233.7	15422.2	0		0.585744	0.688762	0.13054	0.836031	1.2336	0.371786	0.492022	1.53112	3.87785	0.0601584	1.23757	0.333091
10778	Regions/COXKO	11313.7	15422.2	0		0.649956	0.874069	0.0125668	1.07476	1.49694	0.0672571	0.0730103	1.30355	2.79873	1.20983	0.983759	0.0363973
10779	Regions/COXKO	11393.7	15422.2	0		0.94661	1.47748	0.321769	1.07476	1.05911	1.08278	1.08419	0.702875	2.30818	1.20983	0.788314	0.654784
10780	Regions/COXKO	11473.7	15422.2	0		0.788855	0.986755	0.13892	0.931661	1.18241	0.193869	0.25556	1.10406	3.24487	0.0846602	0.308419	0.0922915
10794	Regions/COXKO	10673.7	15342.2	0		0.569805	1.62371	0.166573	1.07476	1.21043	0.0484946	1.08419	0.666498	2.47979	1.20983	0.547661	0.0218805
10795	Regions/COXKO	10753.7	15342.2	0		0.686993	0.909627	0.106435	0.943608	1.43659	0.285146	0.395734	1.03833	3.26365	0.569698	0.462359	0.11344
10796	Regions/COXKO	10833.7	15342.2	0		0.627969	0.673683	0.100828	0.803567	1.25809	0.211285	0.262487	1.42152	3.34778	0.409425	0.733097	0.194417
10797	Regions/COXKO	10913.7	15342.2	0		0.580513	0.843237	0.145855	0.881761	1.65154	0.214685	0.214241	1.11165	2.48224	0.356627	0.604	0.158922
10798	Regions/COXKO	10993.7	15342.2	0		0.666145	0.677881	0.102201	1.00485	1.45762	0.120744	0.105343	1.47264	3.33853	0.574761	0.78779	0.133953
10799	Regions/COXKO	11073.7	15342.2	0		0.5839	0.60822	0.123928	0.62042	1.35437	0.175991	0.195135	1.72165	3.9307	0.398592	0.79817	0.147195
10800	Regions/COXKO	11153.7	15342.2	0		0.635912	0.736555	0.16904	0.727425	1.32045	0.194312	0.189759	1.40376	3.35909	0.414179	0.734829	0.189311
10801	Regions/COXKO	11233.7	15342.2	0		0.675471	0.948854	0.140361	0.833105	1.08408	0.2797	0.430587	1.20224	3.39847	0.0735666	0.660132	0.143833
10802	Regions/COXKO	11313.7	15342.2	0		0.94661	1.47748	0.321769	1.07476	1.05911	1.08278	1.08419	0.702875	2.30818	1.20983	0.788314	0.654784
10803	Regions/COXKO	11393.7	15342.2	0		0.693107	0.866281	0.249126	1.21472	1.43762	0.531489	0.470967	1.22087	2.75274	0.106772	0.683701	0.262603
10804	Regions/COXKO	11473.7	15342.2	0		0.94661	1.47748	0.321769	1.07476	1.05911	1.08278	1.08419	0.702875	2.30818	1.20983	0.788314	0.654784
10819	Regions/COXKO	10673.7	15262.2	0		0.650731	1.0746	0.12963	0.639821	1.00462	0.284491	0.485848	0.983843	2.80784	0.0762159	0.967037	0.22186
10820	Regions/COXKO	10753.7	15262.2	0		0.663544	1.01448	0.102049	0.882692	1.07361	0.256322	0.474083	0.876111	2.66229	0.380217	0.570172	0.191487
10821	Regions/COXKO	10833.7	15262.2	0		0.56601	0.836866	0.139747	1.06004	1.31016	0.237129	0.289985	1.23815	3.17129	0.0577641	0.727534	0.22005
10822	Regions/COXKO	10913.7	15262.2	0		0.604275	0.664752	0.114095	0.779262	1.34282	0.191492	0.186699	1.46115	3.3946	0.370064	0.763084	0.165789
10823	Regions/COXKO	10993.7	15262.2	0		0.591958	0.685754	0.0794634	0.930425	1.46445	0.150549	0.153489	1.30984	3.61943	0.438533	0.705192	0.190796
10824	Regions/COXKO	11073.7	15262.2	0		0.602877	0.762963	0.0864265	0.675079	2.08617	0.0245509	0.0245743	1.21424	2.38203	0.0635848	0.556471	0.11157
10825	Regions/COXKO	11153.7	15262.2	0		0.57265	0.590707	0.111663	0.649931	1.21343	0.17845	0.176033	1.64245	3.92375	0.44939	1.07454	0.158863
10826	Regions/COXKO	11233.7	15262.2	0		0.711494	1.07048	0.112985	0.760156	1.11541	0.285803	0.333264	0.946662	2.93147	0.0615498	0.376999	0.0993606
10827	Regions/COXKO	11313.7	15262.2	0		0.848527	1.00946	0.127461	1.07476	1.13676	0.0579193	1.08419	0.903916	2.92257	1.20983	0.0386949	0.0321405
10828	Regions/COXKO	11393.7	15262.2	0		1.16711	1.5886	0.0324265	1.07476	1.05911	1.08278	1.08419	0.727992	32.7637	1.20983	0.788314	0.654784
10829	Regions/COXKO	11473.7	15262.2	0		0.71666	0.914849	0.124715	0.915722	1.28559	0.174327	0.224679	1.17791	4.76971	0.46975	0.690491	0.118399
10830	Regions/COXKO	11553.7	15262.2	0		0.901062	0.863751	0.120112	0.568502	1.23028	0.16145	0.221145	1.40542	5.33385	0.0869027	0.700737	0.0908783
10846	Regions/COXKO	10673.7	15182.2	0		0.628906	1.03556	0.127895	0.959287	1.01047	0.225707	0.343246	1.00094	3.45888	0.696946	0.552414	0.175052
10847	Regions/COXKO	10753.7	15182.2	0		0.0319939	0.843058	0.0318237	1.07476	1.05911	1.08278	1.08419	1.03895	33.3802	1.20983	0.788314	0.654784
10848	Regions/COXKO	10833.7	15182.2	0		0.6367	0.778913	0.111613	0.630206	1.1161	0.189349	0.267604	1.22526	3.03752	0.297969	0.797403	0.150006
10849	Regions/COXKO	10913.7	15182.2	0		0.65514	0.713495	0.138395	1.11326	1.15957	0.173665	0.18967	1.40361	2.89866	0.523405	0.635564	0.188373
10850	Regions/COXKO	10993.7	15182.2	0		0.626767	0.655209	0.125812	0.806358	1.48705	0.121642	0.108427	1.52711	3.37357	0.411843	0.795692	0.162156
10851	Regions/COXKO	11073.7	15182.2	0		0.58279	0.640137	0.108565	0.71773	1.33335	0.141191	0.145528	1.58709	3.03261	0.417647	0.640749	0.141261
10852	Regions/COXKO	11153.7	15182.2	0		0.576077	0.650696	0.116983	0.745276	1.30329	0.183497	0.202118	1.42415	2.89058	0.552968	0.807439	0.178882
10853	Regions/COXKO	11233.7	15182.2	0		0.728812	0.880751	0.171181	1.07476	1.18566	0.0372814	0.0442714	1.02491	3.40562	1.20983	0.471272	0.0138752
10854	Regions/COXKO	11313.7	15182.2	0		0.94661	1.47748	0.321769	1.07476	1.05911	1.08278	1.08419	0.702875	2.30818	1.20983	0.788314	0.654784
10855	Regions/COXKO	11393.7	15182.2	0		0.94661	1.47748	0.321769	1.07476	1.05911	1.08278	1.08419	0.702875	2.30818	1.20983	0.788314	0.654784
10856	Regions/COXKO	11473.7	15182.2	0		0.676582	0.621394	0.120534	0.909828	1.50498	0.0162306	0.0177904	1.69575	4.96832	0.0604962	0.882958	0.145545
10857	Regions/COXKO	11553.7	15182.2	0		0.564208	0.587112	0.0846049	0.956984	1.52489	0.0141017	0.0102476	1.87853	4.9552	0.530917	0.850536	0.121628
10874	Regions/COXKO	10673.7	15102.2	0		0.730812	0.987425	0.104912	0.0530724	1.1679	0.027742	0.0356672	0.955125	3.17944	0.795939	0.77348	0.0150083
10875	Regions/COXKO	10753.7	15102.2	0		0.769369	0.988936	0.128461	0.871639	0.988871	0.167616	0.233916	0.983332	2.77639	0.0672304	0.541563	0.153405
10876	Regions/COXKO	10833.7	15102.2	0		0.641471	0.940042	0.108686	0.885574	1.18084	0.311596	0.397453	1.03186	2.73255	0.375462	0.521882	0.168496
10877	Regions/COXKO	10913.7	15102.2	0		0.597881	0.864872	0.120802	0.512566	1.47669	0.171852	0.177179	1.16682	3.08144	0.336337	0.64937	0.123505
10878	Regions/COXKO	10993.7	15102.2	0		0.595856	0.660785	0.111698	0.72974	1.59054	0.152881	0.136246	1.47862	3.45688	0.630269	0.551809	0.119451
10879	Regions/COXKO	11073.7	15102.2	0		0.584807	0.827105	0.136599	0.823085	1.25719	0.195343	0.195634	1.25932	3.25438	0.0461875	0.476884	0.123601
10880	Regions/COXKO	11153.7	15102.2	0		0.592855	0.760113	0.133943	0.890508	1.2595	0.177449	0.183507	1.31907	3.22753	0.361394	0.699099	0.200443
10881	Regions/COXKO	11233.7	15102.2	0		0.94661	9.47607	0.321769	1.07476	1.05911	1.08278	1.08419	0.702875	2.30818	1.20983	0.788314	0.654784
10882	Regions/COXKO	11313.7	15102.2	0		0.94661	1.47748	0.321769	1.07476	1.05911	1.08278	1.08419	0.702875	2.30818	1.20983	0.788314	0.654784
10883	Regions/COXKO	11393.7	15102.2	0		0.660699	0.837555	0.104214	0.625608	1.22565	0.180719	0.20206	1.09994	2.87802	0.0352295	0.59162	0.135032
10884	Regions/COXKO	11473.7	15102.2	0		0.572324	0.630071	0.126216	1.13071	1.69503	0.0206215	0.0274013	1.5334	3.62244	0.0599052	0.860692	0.210875
10885	Regions/COXKO	11553.7	15102.2	0		0.575389	0.627936	0.125624	0.906489	1.63549	0.161481	0.136798	1.88287	4.0825	0.0540888	0.929574	0.216769
10903	Regions/COXKO	10593.7	15022.2	0		0.811413	1.09888	0.118704	1.07476	9.81396	1.08278	1.08419	1.09868	6.0709	1.20983	0.788314	0.654784
10904	Regions/COXKO	10673.7	15022.2	0		0.7517	1.09308	0.142122	1.42106	1.27945	0.0337387	0.0364115	1.02956	3.50221	0.576235	0.677923	0.247147
10905	Regions/COXKO	10753.7	15022.2	0		0.711103	0.786776	0.130582	1.02152	1.27891	0.185028	0.183928	1.41581	3.77496	0.597287	0.87218	0.184022
10906	Regions/COXKO	10833.7	15022.2	0		0.653906	0.71357	0.151628	0.578724	1.22854	0.217733	0.209028	1.53466	3.58361	0.487906	0.944255	0.163514
10907	Regions/COXKO	10913.7	15022.2	0		0.627735	0.895117	0.130126	0.764379	1.15877	0.278132	0.351388	1.01946	2.17449	0.236201	0.464003	0.176457
10908	Regions/COXKO	10993.7	15022.2	0		0.599401	0.70059	0.0966656	1.01519	1.57057	0.209875	0.193845	1.26568	2.88744	0.475638	0.787145	0.23775
10909	Regions/COXKO	11073.7	15022.2	0		0.638545	0.75869	0.157819	1.0737	1.45147	0.167433	0.157309	1.4229	3.44988	0.554824	0.559143	0.172727
10910	Regions/COXKO	11153.7	15022.2	0		0.565971	0.600292	0.132551	0.55487	1.17079	0.198708	0.210541	1.56221	3.16513	0.455838	0.731492	0.145504
10911	Regions/COXKO	11233.7	15022.2	0		0.682208	0.692741	0.117202	0.712315	1.50337	0.160839	0.187839	1.47726	3.16358	0.38928	0.689594	0.16377
10912	Regions/COXKO	11313.7	15022.2	0		0.713545	0.80884	0.120589	0.836446	1.44426	0.202726	0.249867	1.295	3.06685	0.493698	0.625072	0.138713
10913	Regions/COXKO	11393.7	15022.2	0		0.727996	0.939321	0.12949	0.734948	1.19562	0.202019	0.225134	1.14418	2.94631	0.0455874	0.520955	0.136538
10914	Regions/COXKO	11473.7	15022.2	0		0.678692	0.873246	0.145541	0.642855	1.21161	0.203404	0.246698	1.16911	3.05845	0.462802	0.501047	0.102399
10915	Regions/COXKO	11553.7	15022.2	0		0.600155	0.628581	0.0897648	0.737688	1.54848	0.164041	0.175632	1.54357	3.76076	0.475832	0.852249	0.157704
10916	Regions/COXKO	11633.7	15022.2	0		0.751009	0.862292	0.148635	0.553045	1.29491	0.256995	0.208834	1.21103	3.60802	0.0432917	0.700737	0.176669
10933	Regions/COXKO	10593.7	14942.2	0		0.720248	0.859338	0.107862	0.825587	0.85628	1.08278	1.08419	1.2406	4.19916	0.0954631	1.19867	0.190803
10934	Regions/COXKO	10673.7	14942.2	0		0.682219	0.722232	0.0806054	0.951645	1.5009	0.0331735	0.0322668	1.54484	5.26694	0.105033	0.725809	0.128139
10935	Regions/COXKO	10753.7	14942.2	0		0.647311	0.742324	0.120211	0.564901	1.20758	0.294673	0.351035	1.31096	3.5518	0.0589129	0.7301	0.114485
10936	Regions/COXKO	10833.7	14942.2	0		0.646777	0.839819	0.129507	0.898177	1.36908	0.167959	0.171435	1.21398	3.34053	0.354909	0.293181	0.0866585
10937	Regions/COXKO	10913.7	14942.2	0		0.798176	0.931892	0.258371	0.0522407	0.647939	0.0388803	0.0650064	1.10446	3.03647	0.0588065	0.704087	0.0165168
10938	Regions/COXKO	10993.7	14942.2	0		0.586217	0.790928	0.10052	0.785431	1.2496	0.207438	0.232715	1.21728	2.72377	0.404129	0.785125	0.203415
10939	Regions/COXKO	11073.7	14942.2	0		0.55376	0.782564	0.121583	0.839117	1.22343	0.13157	0.185956	1.27315	3.00531	0.56723	0.771804	0.187104
10940	Regions/COXKO	11153.7	14942.2	0		0.572634	0.737037	0.113641	0.783846	1.47328	0.202032	0.183982	1.44225	3.08564	0.409657	0.671706	0.187179
10941	Regions/COXKO	11233.7	14942.2	0		0.566865	0.737365	0.196701	0.8961	1.09775	0.247176	0.34851	1.31074	2.81567	0.550806	0.747939	0.220586
10942	Regions/COXKO	11313.7	14942.2	0		0.552485	0.680288	0.134729	0.676694	1.20704	0.22271	0.237812	1.2463	2.57759	0.0457392	0.662576	0.158695
10943	Regions/COXKO	11393.7	14942.2	0		0.562375	0.702897	0.16332	0.760668	1.18937	0.259415	0.251678	1.36135	3.03274	0.0517665	0.73856	0.165117
10944	Regions/COXKO	11473.7	14942.2	0		0.644625	0.74099	0.157008	0.617836	1.29963	0.19996	0.227599	1.3912	3.33725	0.427952	0.488736	0.0921716
10945	Regions/COXKO	11553.7	14942.2	0		0.61615	0.724945	0.133669	0.793116	1.6391	0.0183914	0.0174608	1.28504	2.7419	0.0427398	0.513759	0.137039
10946	Regions/COXKO	11633.7	14942.2	0		0.744197	0.888715	0.153341	0.986761	1.4035	0.20574	0.200079	1.14586	3.50665	0.0666564	0.624834	0.159185
10963	Regions/COXKO	10593.7	14862.2	0		0.66678	0.796405	0.0753016	12.1781	1.41946	0.0561128	1.08419	1.50072	5.54866	1.20983	32.721	7.41936
10964	Regions/COXKO	10673.7	14862.2	0		0.646239	0.848921	0.0818328	0.904475	1.4212	0.189836	0.178334	1.40709	5.39499	0.0584914	0.74771	0.185911
10965	Regions/COXKO	10753.7	14862.2	0		0.550542	0.865954	0.115037	1.13037	1.24458	0.0497536	0.0537843	1.27805	4.16336	0.0873914	0.737829	0.244254
10966	Regions/COXKO	10833.7	14862.2	0		0.609627	0.699604	0.112865	0.73708	1.55334	0.128668	0.123689	1.43513	3.91346	0.313417	0.599237	0.115686
10967	Regions/COXKO	10913.7	14862.2	0		0.638023	0.838732	0.134775	0.766288	1.57554	0.213444	0.240234	1.17908	3.15871	0.521977	0.423398	0.115447
10968	Regions/COXKO	10993.7	14862.2	0		0.657201	0.687889	0.111253	0.903111	1.81285	0.157301	0.140977	1.62877	3.79456	0.46202	0.760139	0.21272
10969	Regions/COXKO	11073.7	14862.2	0		0.513842	0.667649	0.119366	0.891699	1.17174	0.311647	0.316182	1.30331	2.37385	0.908305	0.711973	0.198033
10970	Regions/COXKO	11153.7	14862.2	0		0.580372	0.695274	0.129189	0.787636	1.36721	0.205012	0.134659	1.48852	3.6135	0.513453	0.684521	0.180135
10971	Regions/COXKO	11233.7	14862.2	0		0.628687	0.7863	0.111829	0.636237	1.17052	0.181624	0.178514	1.22918	2.94365	0.572418	0.633311	0.11588
10972	Regions/COXKO	11313.7	14862.2	0		0.576859	0.724497	0.16727	1.10668	1.01768	0.0224812	0.0266515	1.36708	2.99187	0.0524895	0.765133	0.25906
10973	Regions/COXKO	11393.7	14862.2	0		0.65071	0.633529	0.109728	0.765438	1.30383	0.14409	0.15887	1.46339	3.1027	0.375548	0.882157	0.191604
10974	Regions/COXKO	11473.7	14862.2	0		0.590848	0.799032	0.134762	0.765452	1.22192	0.170187	0.178137	1.16211	2.98764	0.436553	0.56152	0.149357
10975	Regions/COXKO	11553.7	14862.2	0		0.567759	0.751827	0.132877	0.882292	1.3151	0.224619	0.20494	1.32357	3.03425	0.0498726	0.759416	0.173272
10976	Regions/COXKO	11633.7	14862.2	0		0.560759	0.779126	0.103177	0.5976	1.35649	0.0134458	0.013365	1.33743	3.68092	0.358603	0.63916	0.104425
10977	Regions/COXKO	11713.7	14862.2	0		0.651916	0.881977	0.134483	0.651744	1.4808	0.285698	0.32604	1.19391	3.67011	0.0573486	0.747978	0.171448
10994	Regions/COXKO	10513.7	14782.2	0		0.621126	1.0097	0.0916055	0.0753006	1.1835	1.08278	1.08419	1.22494	8.74272	0.0847646	0.788314	0.654784
10995	Regions/COXKO	10593.7	14782.2	0		0.561644	0.760666	0.0969013	0.132537	1.184	1.08278	1.08419	1.43282	10.5624	0.149195	0.788314	0.654784
10996	Regions/COXKO	10673.7	14782.2	0		0.777448	0.786331	0.0659942	0.809833	0.94972	1.08278	1.08419	1.44343	11.3231	0.0860882	27.5313	6.93371
10997	Regions/COXKO	10753.7	14782.2	0		0.68928	0.974826	0.121059	1.13926	1.06621	0.233025	0.333696	0.992837	3.50316	0.0769221	0.602736	0.203309
10998	Regions/COXKO	10833.7	14782.2	0		0.428563	0.749196	0.0126916	1.07476	40.7753	0.0459003	0.0435834	1.1095	3.40442	1.20983	0.48367	0.0200319
10999	Regions/COXKO	10913.7	14782.2	0		0.656526	0.749857	0.129062	1.03525	1.42959	0.255493	0.213068	1.36986	3.33192	0.688607	0.581845	0.159073
11000	Regions/COXKO	10993.7	14782.2	0		0.580401	0.657389	0.139606	0.718496	1.3545	0.233799	0.226806	1.5513	3.27939	0.366154	0.816759	0.193211
11001	Regions/COXKO	11073.7	14782.2	0		0.556315	0.726052	0.125793	1.03737	1.38465	0.189879	0.195238	1.35812	3.52962	0.48694	0.759964	0.243527
11002	Regions/COXKO	11153.7	14782.2	0		0.541525	0.703527	0.113041	0.695117	1.3576	0.206359	0.246075	1.3932	3.42693	0.342893	0.970945	0.212695
11003	Regions/COXKO	11233.7	14782.2	0		0.6671	0.769546	0.146453	0.581657	1.12774	0.287876	0.280882	1.252	2.82735	0.0363044	0.741691	0.160172
11004	Regions/COXKO	11313.7	14782.2	0		0.612533	0.602818	0.107374	0.689781	1.46703	0.115495	0.11426	1.61292	3.43715	0.300356	0.949989	0.182763
11005	Regions/COXKO	11393.7	14782.2	0		0.661777	0.815285	0.108291	0.854136	1.02778	0.0241942	0.0247388	1.15319	3.47424	0.057148	0.703576	0.204673
11006	Regions/COXKO	11473.7	14782.2	0		0.591256	0.698511	0.0990811	0.669197	1.35978	0.257216	0.304027	1.52205	3.24418	0.565904	0.646976	0.158
11007	Regions/COXKO	11553.7	14782.2	0		0.573923	0.628386	0.119193	0.632826	1.24397	0.20548	0.204401	1.67883	3.64584	0.391269	0.775518	0.131019
11008	Regions/COXKO	11633.7	14782.2	0		0.57946	0.622694	0.0955476	0.671564	1.57608	0.217416	0.186475	1.64209	3.34976	0.370709	0.730442	0.121153
11009	Regions/COXKO	11713.7	14782.2	0		0.684932	1.02465	0.0912385	1.10908	1.15696	0.228702	0.31702	1.00303	2.9087	0.0895413	0.569063	0.155842
11026	Regions/COXKO	10513.7	14702.2	0		0.623918	0.817904	0.115354	0.81896	1.10013	0.0348289	0.0453306	1.35967	4.53808	0.792732	1.24681	0.194531
11027	Regions/COXKO	10593.7	14702.2	0		0.806212	1.0744	0.099472	0.667874	1.70783	0.20849	0.221615	0.881888	5.19346	0.072746	0.60934	0.133456
11028	Regions/COXKO	10673.7	14702.2	0		0.620334	0.776454	0.170689	0.672452	1.24168	0.274428	0.339332	1.32921	3.17945	0.0721604	0.646636	0.14183
11029	Regions/COXKO	10753.7	14702.2	0		0.693738	0.733826	0.105151	1.05047	1.23502	0.0212522	0.0215092	1.31498	2.80981	0.0589511	0.695617	0.183343
11030	Regions/COXKO	10833.7	14702.2	0		0.549093	0.598426	0.0919158	0.796957	1.30067	0.210177	0.191177	1.6412	3.89273	0.579852	0.87824	0.173881
11031	Regions/COXKO	10913.7	14702.2	0		0.584075	0.551828	0.0883184	0.658334	1.47431	0.132113	0.145336	1.61365	3.46625	0.626078	0.834073	0.151827
11032	Regions/COXKO	10993.7	14702.2	0		0.592613	0.620744	0.131144	1.01179	1.53816	0.134403	0.124129	1.57062	3.51277	0.492538	0.593032	0.166337
11033	Regions/COXKO	11073.7	14702.2	0		0.611747	0.57267	0.10286	1.0608	1.63341	0.114866	0.0886621	1.74352	3.59083	0.667896	0.821976	0.17807
11034	Regions/COXKO	11153.7	14702.2	0		0.578381	0.701109	0.104918	0.490034	1.05957	0.22409	0.307619	1.25346	2.87807	0.408464	0.797586	0.144635
11035	Regions/COXKO	11233.7	14702.2	0		0.583679	0.736569	0.14766	0.945756	1.37986	0.181035	0.186371	1.23371	2.44353	0.562565	0.811413	0.228284
11036	Regions/COXKO	11313.7	14702.2	0		0.565387	0.818323	0.1018	0.846204	1.22467	0.253821	0.29598	1.14718	2.80728	0.403694	0.624066	0.168871
11037	Regions/COXKO	11393.7	14702.2	0		0.56096	0.896673	0.0946468	0.507876	0.887749	0.285032	0.495817	0.882156	1.97152	0.395774	0.833688	0.200308
11038	Regions/COXKO	11473.7	14702.2	0		0.63557	0.879786	0.135779	0.985179	1.19637	0.282237	0.319404	1.13533	2.82079	0.0611282	0.732067	0.199412
11039	Regions/COXKO	11553.7	14702.2	0		0.610651	0.965688	0.119808	0.877314	1.04737	0.367452	0.403544	0.998082	2.77416	0.0481922	0.604744	0.176989
11040	Regions/COXKO	11633.7	14702.2	0		0.685157	0.934054	0.143935	0.981695	1.18634	0.244497	0.330803	1.0699	2.91923	0.536429	0.505941	0.148789
11041	Regions/COXKO	11713.7	14702.2	0		0.714774	0.945761	0.152869	1.28841	1.15786	0.359967	0.563977	1.08273	2.53497	0.656865	0.562019	0.223746
11042	Regions/COXKO	11793.7	14702.2	0		0.781103	1.10471	0.150684	1.14396	1.48917	0.0375552	0.0520032	0.956393	2.8501	0.121265	0.459365	0.183098
11058	Regions/COXKO	10513.7	14622.2	0		0.591579	0.866856	0.133106	0.770392	1.04562	0.415924	0.568988	1.32684	3.80605	0.0769242	0.838575	0.202384
11059	Regions/COXKO	10593.7	14622.2	0		0.78608	1.05972	0.144765	0.0783226	1.57186	0.050825	0.0676922	0.876231	2.79803	0.0881664	1.08745	0.0333282
11060	Regions/COXKO	10673.7	14622.2	0		0.623953	0.826211	0.164726	0.809532	1.45843	0.0317895	0.0462394	1.23915	4.13879	0.0528406	0.552295	0.219539
11061	Regions/COXKO	10753.7	14622.2	0		0.656987	0.688816	0.106276	1.05995	1.29038	0.218052	0.239894	1.47627	3.72796	0.559501	0.765816	0.248544
11062	Regions/COXKO	10833.7	14622.2	0		0.624639	0.823586	0.102134	0.739162	1.23308	0.0226575	0.0192072	1.20509	3.74195	0.0555412	0.559056	0.117704
11063	Regions/COXKO	10913.7	14622.2	0		0.587145	0.601383	0.128395	0.536115	1.58474	0.0163391	0.0143118	1.74025	3.82149	0.236365	0.811227	0.178886
11064	Regions/COXKO	10993.7	14622.2	0		0.70741	0.797126	0.174074	1.30716	1.24527	0.231647	0.194721	1.23375	2.97929	0.507657	0.689542	0.247574
11065	Regions/COXKO	11073.7	14622.2	0		0.552143	0.582641	0.122758	0.921612	1.45383	0.172614	0.145746	1.67692	3.77278	0.413485	0.970353	0.264723
11066	Regions/COXKO	11153.7	14622.2	0		0.650602	0.727056	0.0898371	0.565037	1.20188	0.114205	0.156869	1.35942	3.08848	0.30697	0.755674	0.157257
11067	Regions/COXKO	11233.7	14622.2	0		0.60769	0.987951	0.11878	0.0585757	1.10146	0.02761	0.0259498	0.8512	1.98415	0.0659377	0.761586	0.0133969
11068	Regions/COXKO	11313.7	14622.2	0		0.642064	0.660919	0.100756	0.782467	1.23997	0.178233	0.216061	1.5483	3.52323	0.605153	0.887823	0.158754
11069	Regions/COXKO	11393.7	14622.2	0		0.569018	0.808679	0.116969	0.683066	1.03177	0.189823	0.332269	1.15642	2.52352	0.316051	0.785232	0.209957
11070	Regions/COXKO	11473.7	14622.2	0		0.576325	0.907621	0.109932	0.455866	0.969834	0.198304	0.288452	1.0043	2.65457	0.302762	0.801528	0.159201
11071	Regions/COXKO	11553.7	14622.2	0		0.630679	0.854278	0.145465	0.841295	1.24045	0.0188349	0.0199228	1.0552	2.33577	0.0364433	0.642245	0.21665
11072	Regions/COXKO	11633.7	14622.2	0		0.61438	0.811767	0.0984022	0.68251	1.07928	0.268571	0.332704	0.9822	2.19351	0.452542	0.680471	0.167082
11073	Regions/COXKO	11713.7	14622.2	0		0.638278	0.788522	0.153239	0.832652	1.41313	0.238734	0.270203	1.23511	2.79997	0.0412454	0.669435	0.218664
11074	Regions/COXKO	11793.7	14622.2	0		0.632824	0.796164	0.168006	0.547884	1.45093	0.225831	0.245207	1.39412	3.83653	0.0502385	0.892822	0.154106
11075	Regions/COXKO	11873.7	14622.2	0		0.94661	1.47748	0.321769	1.07476	1.05911	1.08278	1.08419	0.702875	2.30818	1.20983	0.788314	0.654784
11091	Regions/COXKO	10433.7	14542.2	0		0.673772	0.855247	0.094358	0.732359	0.601637	1.08278	1.08419	1.57483	10.3989	0.105439	0.788314	5.11962
11092	Regions/COXKO	10513.7	14542.2	0		0.719138	0.708808	0.176873	1.45114	0.920569	0.0517149	0.0584298	1.56699	4.16709	0.0801108	1.57457	0.510285
11093	Regions/COXKO	10593.7	14542.2	0		0.706966	1.19966	0.147552	1.01214	1.00393	0.0421875	0.0668842	0.934758	3.75211	0.0946061	0.857324	0.238757
11094	Regions/COXKO	10673.7	14542.2	0		0.862124	0.761339	0.196864	0.677944	1.35958	0.029553	0.0402079	1.38923	3.96538	0.0672835	0.706824	0.138778
11095	Regions/COXKO	10753.7	14542.2	0		1.12945	0.631459	0.0211396	1.07476	1.05911	1.08278	1.08419	1.46647	62.4189	1.20983	0.788314	0.654784
11096	Regions/COXKO	10833.7	14542.2	0		0.616273	0.537407	0.0825528	0.639011	1.61272	0.158734	0.129776	1.89866	3.6334	0.363127	0.963143	0.139698
11097	Regions/COXKO	10913.7	14542.2	0		0.655041	0.669584	0.115173	0.81308	1.44552	0.167467	0.176945	1.41883	3.0023	0.547736	0.743389	0.146212
11098	Regions/COXKO	10993.7	14542.2	0		0.575609	0.607362	0.155676	1.21018	1.35198	0.258305	0.23789	1.61289	3.10171	0.592577	0.766716	0.217469
11099	Regions/COXKO	11073.7	14542.2	0		0.535938	0.602218	0.0936225	0.809145	1.4233	0.155596	0.104286	1.77691	4.0245	0.501151	0.99737	0.235664
11100	Regions/COXKO	11153.7	14542.2	0		0.540803	0.730018	0.0896677	0.70541	1.33248	0.150507	0.155341	1.24099	3.24542	0.359025	0.926175	0.205
11101	Regions/COXKO	11233.7	14542.2	0		0.541484	0.801324	0.130737	0.740356	0.960047	0.199702	0.241423	1.2181	3.14838	0.569423	0.695958	0.158796
11102	Regions/COXKO	11313.7	14542.2	0		0.578129	0.666232	0.076285	0.844251	1.12353	0.257937	0.299749	1.26897	2.78831	0.580024	0.676483	0.165176
11103	Regions/COXKO	11393.7	14542.2	0		0.535324	0.640645	0.126948	0.788355	1.34945	0.160823	0.132745	1.61741	3.25464	0.612035	0.888115	0.191435
11104	Regions/COXKO	11473.7	14542.2	0		0.5443	0.848124	0.123463	0.393574	1.09307	0.253254	0.304592	1.0391	2.15248	0.487801	0.590524	0.108081
11105	Regions/COXKO	11553.7	14542.2	0		0.708654	0.751433	0.133238	0.869274	1.29751	0.181105	0.195289	1.57288	3.29345	0.0336671	0.74678	0.235988
11106	Regions/COXKO	11633.7	14542.2	0		0.673941	0.714452	0.0870977	1.07449	1.47922	0.0228005	0.0225642	1.34495	3.0586	0.0404699	0.813859	0.282207
11107	Regions/COXKO	11713.7	14542.2	0		0.688327	0.748364	0.103434	0.676967	1.19719	0.251055	0.24863	1.30366	3.52546	0.405742	0.756164	0.18254
11108	Regions/COXKO	11793.7	14542.2	0		0.615673	0.922109	0.157601	1.02228	1.55941	0.0234985	0.0227048	1.25913	3.0464	0.505489	0.559078	0.177503
11109	Regions/COXKO	11873.7	14542.2	0		0.768557	0.660495	0.100587	0.879409	1.2927	0.0262824	0.0279505	1.32705	3.05829	0.0508178	0.76777	0.290249
11125	Regions/COXKO	10433.7	14462.2	0		0.583861	0.853034	0.089708	0.971538	1.23812	0.258504	0.287152	1.35825	4.8656	0.480575	1.11534	0.269323
11126	Regions/COXKO	10513.7	14462.2	0		0.563745	0.768435	0.143212	0.045219	1.18014	0.0416093	0.0666404	1.39976	3.24286	0.0509023	1.02808	0.0214069
11127	Regions/COXKO	10593.7	14462.2	0		0.754614	0.776215	0.0986928	1.01665	1.17394	0.0300482	0.0342453	1.41254	5.22576	0.0931869	0.845459	0.193872
11128	Regions/COXKO	10673.7	14462.2	0		0.827762	0.539035	0.0111076	0.0502724	1.16559	0.048888	0.0833183	1.59401	5.15783	0.854418	1.50063	0.0278885
11129	Regions/COXKO	10753.7	14462.2	0		0.709836	0.976724	0.00942502	1.07476	0.981252	0.872175	15.6331	0.785572	2.45655	1.20983	0.565799	0.0223762
11130	Regions/COXKO	10833.7	14462.2	0		0.640211	0.653842	0.148343	0.77314	1.23049	0.22839	0.24832	1.3745	2.94383	0.548896	0.841801	0.171077
11131	Regions/COXKO	10913.7	14462.2	0		0.518299	0.662538	0.156963	0.726877	1.32492	0.201593	0.170532	1.47733	2.8562	0.359286	0.650082	0.184048
11132	Regions/COXKO	10993.7	14462.2	0		0.584221	0.578935	0.128604	0.897107	1.45655	0.164426	0.12502	1.63518	3.70548	0.509923	0.690378	0.21632
11133	Regions/COXKO	11073.7	14462.2	0		0.620416	0.672929	0.10252	0.765694	1.63742	0.178825	0.16039	1.4031	3.71059	0.449188	0.810825	0.178641
11134	Regions/COXKO	11153.7	14462.2	0		0.561571	0.8162	0.129711	0.629347	1.58529	0.160374	0.170269	1.24742	3.03651	0.390677	0.706926	0.156138
11135	Regions/COXKO	11233.7	14462.2	0		0.574223	0.579809	0.137603	0.541627	1.43372	0.0206863	0.0205936	1.63385	3.32171	0.0400777	1.13278	0.200083
11136	Regions/COXKO	11313.7	14462.2	0		0.747584	0.723279	0.128	1.01592	1.30566	0.219196	0.193044	1.29561	3.30767	0.479623	0.697041	0.232915
11137	Regions/COXKO	11393.7	14462.2	0		0.678347	0.748968	0.145579	0.883367	1.50889	0.243785	0.21314	1.27113	3.05226	0.470965	0.743913	0.20056
11138	Regions/COXKO	11473.7	14462.2	0		0.595278	0.585846	0.111545	1.09903	1.52527	0.210906	0.166086	1.85988	3.9317	0.963416	1.03752	0.219903
11139	Regions/COXKO	11553.7	14462.2	0		0.606677	0.559199	0.116893	1.03462	1.38132	0.160857	0.140545	1.76529	3.55203	0.703474	1.02708	0.217995
11140	Regions/COXKO	11633.7	14462.2	0		0.639316	0.680082	0.129134	0.670613	1.39591	0.172659	0.207819	1.42577	3.53166	0.488595	0.786669	0.153122
11141	Regions/COXKO	11713.7	14462.2	0		0.659463	0.586549	0.0940398	0.685709	1.06019	0.17739	0.220858	1.26168	2.61076	0.647564	1.01635	0.195008
11142	Regions/COXKO	11793.7	14462.2	0		0.651956	0.615283	0.117012	0.689735	1.23113	0.169922	0.167574	1.43984	3.17411	0.510905	0.871405	0.169868
11143	Regions/COXKO	11873.7	14462.2	0		0.629708	0.757449	0.128926	0.915498	1.53211	0.0172212	0.0193943	1.21588	3.1895	0.561637	0.683923	0.169179
11159	Regions/COXKO	10433.7	14382.2	0		0.718295	0.997069	0.0776302	0.947069	1.5376	0.0318879	1.08419	1.21398	7.01833	0.158296	0.674354	0.0949055
11160	Regions/COXKO	10513.7	14382.2	0		0.767575	1.05676	0.142134	0.949289	1.39666	0.182168	0.19825	1.02579	3.42734	0.65389	0.45656	0.136933
11161	Regions/COXKO	10593.7	14382.2	0		0.667452	0.776936	0.195776	0.869725	1.07606	0.0464347	0.0467719	1.57058	3.75812	0.0730773	0.912308	0.213177
11162	Regions/COXKO	10673.7	14382.2	0		0.799728	0.905227	0.0858964	0.497144	1.22587	0.0369106	0.03561	1.11659	4.99306	0.0743956	0.602559	0.107194
11163	Regions/COXKO	10753.7	14382.2	0		0.713507	0.701278	0.126144	1.193	1.25791	0.372634	0.379088	1.41754	3.39071	0.645483	0.808648	0.257077
11164	Regions/COXKO	10833.7	14382.2	0		0.7678	0.907156	0.104182	0.977988	1.1927	0.0283447	0.0293291	1.16822	3.99416	0.0758252	0.805723	0.186819
11165	Regions/COXKO	10913.7	14382.2	0		0.614926	0.77131	0.1088	0.86672	1.08545	0.199711	0.176321	1.35814	3.38224	0.413795	0.656197	0.191735
11166	Regions/COXKO	10993.7	14382.2	0		0.65117	0.762007	0.104361	0.665842	1.08237	0.0177015	0.0171467	1.39216	3.88275	0.305625	0.593176	0.124121
11167	Regions/COXKO	11073.7	14382.2	0		0.0504408	0.0960692	0.0285085	1.07476	1.05911	1.08278	1.08419	0.957736	2.30818	1.20983	0.788314	0.654784
11168	Regions/COXKO	11153.7	14382.2	0		0.600639	0.58591	0.108103	0.906713	1.50347	0.207192	0.250139	1.40767	3.23691	0.39825	0.836469	0.20068
11169	Regions/COXKO	11233.7	14382.2	0		0.560089	0.61244	0.13356	1.00395	1.3579	0.179039	0.164825	1.5472	3.57725	0.48519	0.790826	0.246282
11170	Regions/COXKO	11313.7	14382.2	0		0.583863	0.727575	0.122289	0.705748	1.26628	0.147343	0.165696	1.2787	3.38726	0.438721	0.632761	0.159979
11171	Regions/COXKO	11393.7	14382.2	0		0.648707	0.714785	0.137335	0.658988	1.30357	0.248693	0.245073	1.37208	3.23205	0.381388	0.725557	0.153149
11172	Regions/COXKO	11473.7	14382.2	0		0.64828	0.850298	0.153712	0.677907	1.53353	0.282722	0.340468	1.08907	2.76119	0.778093	0.498123	0.111023
11173	Regions/COXKO	11553.7	14382.2	0		0.612419	0.77056	0.108223	0.770501	1.25429	0.128319	0.13939	1.17739	3.28955	0.392391	0.677844	0.177207
11174	Regions/COXKO	11633.7	14382.2	0		0.663475	0.716341	0.146024	0.784662	1.22673	0.0178617	0.0185728	1.37162	3.23378	0.424248	0.85598	0.177641
11175	Regions/COXKO	11713.7	14382.2	0		0.700131	0.728749	0.125658	0.792304	1.20477	0.150194	0.149796	1.33581	3.3101	0.617919	0.718802	0.181312
11176	Regions/COXKO	11793.7	14382.2	0		0.632578	0.680316	0.11226	1.11348	1.16977	0.177208	0.197291	1.36332	3.19989	0.733995	0.68619	0.19112
11177	Regions/COXKO	11873.7	14382.2	0		0.655367	0.82056	0.153842	0.678322	1.20023	0.225489	0.263105	1.1954	2.89057	0.364051	0.525218	0.109494
11178	Regions/COXKO	11953.7	14382.2	0		0.68257	1.35164	0.130896	1.09772	1.10084	0.197972	0.302225	0.826439	3.50743	0.107861	0.585371	0.159747
11195	Regions/COXKO	10433.7	14302.2	0		0.665509	0.720106	0.151116	1.38038	1.49523	0.174648	0.226073	1.4391	3.62164	0.717857	1.03203	0.284257
11196	Regions/COXKO	10513.7	14302.2	0		0.700837	0.696424	0.13626	0.776941	1.5118	0.0201579	0.0224378	1.5031	3.48021	0.0540155	0.804016	0.162037
11197	Regions/COXKO	10593.7	14302.2	0		0.672779	0.780199	0.0656593	1.33814	1.14317	1.08278	0.0322533	1.39693	6.60713	0.146394	0.768781	0.138976
11198	Regions/COXKO	10673.7	14302.2	0		0.732739	0.863818	0.118563	0.431998	1.06649	0.232882	0.252826	1.28607	3.6773	0.0615163	0.674136	0.101833
11199	Regions/COXKO	10753.7	14302.2	0		0.616892	0.792467	0.107132	0.557476	1.2721	0.0374673	0.0311681	1.37607	5.35094	0.0673854	0.80677	0.12537
11200	Regions/COXKO	10833.7	14302.2	0		0.721922	0.891757	0.16822	0.938132	1.33952	0.0276531	0.0353558	1.44547	4.93786	0.0658127	0.944324	0.217851
11201	Regions/COXKO	10913.7	14302.2	0		0.782624	0.996111	0.130211	1.02833	1.13727	0.273342	0.259219	0.996652	4.13757	0.0737378	0.740304	0.220599
11202	Regions/COXKO	10993.7	14302.2	0		0.803163	0.812089	0.145388	14.1142	1.32843	0.0479647	0.0498961	1.07332	2.7763	1.20983	0.430136	0.170418
11203	Regions/COXKO	11073.7	14302.2	0		0.515008	1.06438	0.0171324	1.07476	1.05911	0.0661796	1.08419	0.859826	62.7142	1.20983	0.0382456	0.0317674
11204	Regions/COXKO	11153.7	14302.2	0		0.571386	0.670074	0.091955	1.29021	1.44642	0.179869	0.173659	1.43612	4.01898	0.710118	0.755585	0.199408
11205	Regions/COXKO	11233.7	14302.2	0		0.526049	0.654627	0.163911	0.665824	1.32724	0.019064	0.017172	1.74303	3.84977	0.604967	0.908597	0.186292
11206	Regions/COXKO	11313.7	14302.2	0		0.576122	0.715346	0.101375	0.744008	1.37077	0.218578	0.212743	1.27439	3.05533	0.456399	0.671891	0.133055
11207	Regions/COXKO	11393.7	14302.2	0		0.658782	0.808237	0.147251	0.864846	1.15478	0.210977	0.23259	1.23779	2.86566	0.540875	0.530453	0.162088
11208	Regions/COXKO	11473.7	14302.2	0		0.609613	0.61782	0.106877	0.869122	1.72948	0.191262	0.192933	1.46197	3.59203	0.611943	0.800035	0.185301
11209	Regions/COXKO	11553.7	14302.2	0		0.710257	0.893765	0.157588	0.698841	1.14332	0.297489	0.412713	1.06476	3.39059	0.0393973	0.660269	0.19554
11210	Regions/COXKO	11633.7	14302.2	0		0.59701	0.743388	0.147905	0.840202	1.08897	0.258139	0.340614	1.22966	3.2342	0.574152	0.817122	0.215864
11211	Regions/COXKO	11713.7	14302.2	0		0.679907	0.773797	0.122058	0.854548	1.13158	0.234436	0.261713	1.30942	2.95143	0.546812	0.682476	0.142909
11212	Regions/COXKO	11793.7	14302.2	0		0.710082	0.784928	0.11527	0.897625	1.35608	0.167688	0.220571	1.22364	3.44575	0.416602	0.710801	0.203977
11213	Regions/COXKO	11873.7	14302.2	0		0.664819	0.869754	0.13994	0.772081	1.22493	0.296823	0.361608	1.28037	3.14405	0.446526	0.643468	0.147478
11214	Regions/COXKO	11953.7	14302.2	0		0.94661	1.47748	0.321769	1.07476	1.05911	1.08278	1.08419	0.702875	2.30818	1.20983	0.788314	0.654784
11231	Regions/COXKO	10433.7	14222.2	0		0.709813	1.14972	0.142959	1.07476	1.09835	0.0470505	0.0649282	0.823836	3.21395	1.20983	0.580552	0.0164752
11232	Regions/COXKO	10513.7	14222.2	0		0.626701	1.07824	0.189042	0.933994	1.14351	0.0287877	0.0387083	0.924856	2.71766	0.0620035	0.535336	0.227909
11233	Regions/COXKO	10593.7	14222.2	0		0.683987	0.917587	0.101933	1.21227	1.23221	0.0376546	0.0427309	1.09788	3.66706	0.0810627	0.706597	0.247453
11234	Regions/COXKO	10673.7	14222.2	0		0.611336	0.73855	0.140938	0.865926	1.17545	0.435558	0.497444	1.30873	2.91753	0.065567	0.839102	0.253902
11235	Regions/COXKO	10753.7	14222.2	0		0.94661	9.17821	0.0358686	1.07476	1.05911	1.08278	1.08419	0.0783517	23.496	1.20983	13.3806	0.654784
11236	Regions/COXKO	10833.7	14222.2	0		0.726929	1.05407	0.170263	0.679737	1.03273	0.335464	0.395444	0.919069	3.62258	0.335646	0.560718	0.168646
11237	Regions/COXKO	10913.7	14222.2	0		0.625582	0.730522	0.184502	1.07476	1.13995	1.08278	1.08419	1.3121	2.35849	1.20983	1.0551	0.0323274
11238	Regions/COXKO	10993.7	14222.2	0		0.57772	0.738481	0.13011	1.10353	1.43389	0.155044	0.132606	1.46794	3.72479	0.506775	0.678373	0.203036
11239	Regions/COXKO	11073.7	14222.2	0		0.510296	0.697932	0.144102	1.04808	1.21849	0.20285	0.223671	1.44554	3.10135	0.622651	0.610428	0.222403
11240	Regions/COXKO	11153.7	14222.2	0		0.591578	0.674723	0.119016	0.763634	1.2757	0.169584	0.202617	1.46605	3.52676	0.301932	0.880923	0.225149
11241	Regions/COXKO	11233.7	14222.2	0		0.568173	0.635527	0.149794	1.32521	1.37491	0.0239503	0.0278854	1.4164	3.29276	0.0711987	0.856273	0.255366
11242	Regions/COXKO	11313.7	14222.2	0		0.579383	0.745154	0.108296	0.806686	1.42102	0.133108	0.124196	1.2318	3.51476	0.662184	0.607512	0.145973
11243	Regions/COXKO	11393.7	14222.2	0		0.626596	0.619974	0.139359	1.19571	1.62831	0.164635	0.168883	1.54411	3.65465	0.710147	0.710689	0.235244
11244	Regions/COXKO	11473.7	14222.2	0		0.633137	0.712107	0.120944	1.03139	1.21948	0.262011	0.226608	1.4335	3.61494	0.557225	0.873274	0.245997
11245	Regions/COXKO	11553.7	14222.2	0		0.578456	0.724834	0.170449	0.889189	1.19392	0.282215	0.277234	1.25398	2.47538	0.727507	0.693301	0.182595
11246	Regions/COXKO	11633.7	14222.2	0		0.670932	0.75488	0.159434	0.846169	0.98919	0.022043	0.0225386	1.24799	2.82594	0.369662	0.715214	0.194127
11247	Regions/COXKO	11713.7	14222.2	0		0.671385	0.740769	0.138831	0.625231	1.15064	0.282156	0.292586	1.38642	2.98167	0.0473691	0.600968	0.113865
11248	Regions/COXKO	11793.7	14222.2	0		0.687907	0.806611	0.122833	0.976942	1.23354	0.197799	0.245132	1.13972	3.08829	0.516151	0.499971	0.181404
11249	Regions/COXKO	11873.7	14222.2	0		0.584447	0.767797	0.143873	0.924897	1.2496	0.231451	0.319629	1.32383	3.22818	0.0443514	0.798568	0.222758
11250	Regions/COXKO	11953.7	14222.2	0		0.594749	0.887082	0.12276	0.769917	1.52887	0.256331	0.302216	1.04954	2.76942	0.527559	0.559188	0.163343
11251	Regions/COXKO	12033.7	14222.2	0		0.681175	1.23465	0.042776	1.07476	1.05911	1.08278	1.08419	1.00918	19.1411	1.20983	0.788314	0.654784
11268	Regions/COXKO	10433.7	14142.2	0		0.591389	0.890858	0.123353	0.794121	1.34348	0.170097	0.184352	1.14773	3.04705	0.0473552	0.560594	0.16523
11269	Regions/COXKO	10513.7	14142.2	0		0.570959	0.638413	0.151536	0.798448	1.4199	0.180292	0.17318	1.67573	3.57816	0.455628	0.819179	0.221294
11270	Regions/COXKO	10593.7	14142.2	0		0.747197	0.980199	0.083442	19.7533	1.49379	0.0290371	0.0338635	0.854913	3.28531	1.20983	0.516076	0.236788
11271	Regions/COXKO	10673.7	14142.2	0		0.502784	0.692145	0.0135984	1.07476	0.0504186	1.08278	1.08419	1.07168	2.1859	1.20983	0.698481	0.0249275
11272	Regions/COXKO	10753.7	14142.2	0		0.669043	1.24014	0.144743	0.0852478	1.17036	0.0359665	0.0402163	0.775211	2.57543	0.0959619	0.535511	0.0155941
11273	Regions/COXKO	10833.7	14142.2	0		0.94661	1.47748	0.321769	1.07476	1.05911	1.08278	1.08419	0.702875	2.30818	1.20983	0.788314	0.654784
11274	Regions/COXKO	10913.7	14142.2	0		0.649011	0.690137	0.141416	0.863999	1.16975	0.212763	0.199734	1.40597	2.87994	0.57583	0.64683	0.167593
11275	Regions/COXKO	10993.7	14142.2	0		0.62956	0.785206	0.113428	0.90239	1.34579	0.334645	0.301478	1.12138	2.97163	0.0463945	0.511734	0.16056
11276	Regions/COXKO	11073.7	14142.2	0		0.58112	0.613419	0.106773	0.90582	1.29677	0.172112	0.188388	1.57601	3.58075	0.0366857	0.775147	0.218063
11277	Regions/COXKO	11153.7	14142.2	0		0.616826	0.752533	0.0960819	0.912459	1.46515	0.296079	0.384587	1.28179	3.1393	0.524111	0.659653	0.183996
11278	Regions/COXKO	11233.7	14142.2	0		0.638904	0.736036	0.106103	0.830349	1.2556	0.242529	0.330392	1.04306	2.60132	0.497775	0.67693	0.219285
11279	Regions/COXKO	11313.7	14142.2	0		0.604422	0.722681	0.153819	0.636179	1.13513	0.283166	0.293677	1.37989	2.93946	0.0545133	0.771615	0.157503
11280	Regions/COXKO	11393.7	14142.2	0		0.616715	0.631544	0.0902538	0.816558	1.43505	0.217694	0.172888	1.42441	3.29134	0.599974	0.933564	0.208338
11281	Regions/COXKO	11473.7	14142.2	0		0.622616	0.653712	0.164531	1.01806	1.69411	0.0275084	0.0235254	1.45401	2.96272	1.11168	0.85727	0.188179
11282	Regions/COXKO	11553.7	14142.2	0		0.64394	0.664184	0.155401	0.899751	1.04704	0.237537	0.252011	1.48515	3.56684	0.7064	0.767965	0.186282
11283	Regions/COXKO	11633.7	14142.2	0		0.579558	0.611895	0.0811092	0.79494	1.33774	0.220428	0.195411	1.52257	3.23016	0.557424	0.694795	0.164521
11284	Regions/COXKO	11713.7	14142.2	0		0.577698	0.577525	0.0766514	0.752713	1.54387	0.173987	0.145568	1.74583	3.72688	0.455898	1.05943	0.229241
11285	Regions/COXKO	11793.7	14142.2	0		0.614133	0.811903	0.113869	0.609246	1.28743	0.232761	0.288698	1.15044	3.19893	0.394214	0.579148	0.138603
11286	Regions/COXKO	11873.7	14142.2	0		0.5995	0.755371	0.142277	0.885451	1.2732	0.209463	0.254997	1.30813	2.93686	0.455628	0.574258	0.167677
11287	Regions/COXKO	11953.7	14142.2	0		0.539901	0.646835	0.139333	0.602961	1.43255	0.211892	0.199232	1.50916	3.20651	0.480514	0.870699	0.189054
11288	Regions/COXKO	12033.7	14142.2	0		0.753417	1.06671	0.144947	1.34094	1.33576	0.319645	0.354337	0.980417	3.70759	0.114826	0.578655	0.152821
11306	Regions/COXKO	10433.7	14062.2	0		0.046772	1.47748	0.321769	1.07476	1.05911	1.08278	1.08419	0.702875	2.30818	1.20983	0.788314	0.654784
11307	Regions/COXKO	10513.7	14062.2	0		0.655688	0.74081	0.155118	0.684379	1.16234	0.192843	0.247119	1.24765	2.7395	0.410334	0.693922	0.173017
11308	Regions/COXKO	10593.7	14062.2	0		0.553225	0.72786	0.135102	0.794512	1.20122	0.1735	0.182867	1.38433	2.98833	0.517532	0.825898	0.141439
11309	Regions/COXKO	10673.7	14062.2	0		0.596819	0.780993	0.100161	0.433213	1.09954	0.229076	0.366344	0.957318	2.20517	0.370047	0.746061	0.119189
11310	Regions/COXKO	10753.7	14062.2	0		0.608504	0.917858	0.170416	1.07476	0.945977	0.0434485	0.0497992	0.972044	2.58481	1.20983	0.685854	0.0202638
11311	Regions/COXKO	10833.7	14062.2	0		0.585531	0.918362	0.141166	1.12159	1.53895	0.0339097	0.0251884	1.06077	2.8982	0.0507395	0.634043	0.255519
11312	Regions/COXKO	10913.7	14062.2	0		0.550629	0.648413	0.0908796	0.765363	1.27946	0.169792	0.159611	1.28969	2.81088	0.492175	0.793571	0.182156
11313	Regions/COXKO	10993.7	14062.2	0		0.540845	0.639518	0.126392	0.745839	1.45285	0.0198018	0.0173077	1.33195	2.88241	0.451	0.684016	0.185323
11314	Regions/COXKO	11073.7	14062.2	0		0.566	0.671861	0.14793	0.821841	1.41781	0.295107	0.339204	1.53878	3.06594	0.574187	0.718772	0.202009
11315	Regions/COXKO	11153.7	14062.2	0		0.548315	0.735244	0.111	1.24193	1.59117	0.147457	0.103346	1.49748	3.86921	0.554576	0.81445	0.26275
11316	Regions/COXKO	11233.7	14062.2	0		0.546679	0.733827	0.127147	1.12155	1.45523	0.261254	0.217923	1.2662	3.31372	0.607774	0.586829	0.184875
11317	Regions/COXKO	11313.7	14062.2	0		0.659233	0.603759	0.0947937	0.978272	1.84404	0.0201589	0.0208701	1.46892	3.6253	0.938151	0.854515	0.167296
11318	Regions/COXKO	11393.7	14062.2	0		0.582693	0.534434	0.0937372	0.835288	1.37855	0.166398	0.153841	1.54528	3.28923	0.480092	0.911971	0.233406
11319	Regions/COXKO	11473.7	14062.2	0		0.569669	0.514379	0.111765	0.744376	1.33756	0.208965	0.183277	1.7767	3.72049	0.656638	1.03669	0.233265
11320	Regions/COXKO	11553.7	14062.2	0		0.557002	0.66213	0.114697	0.644146	1.63574	0.267354	0.238311	1.32782	3.24541	0.44268	0.771102	0.172139
11321	Regions/COXKO	11633.7	14062.2	0		0.575488	0.588703	0.125968	0.810379	1.61178	0.179477	0.173078	1.71702	4.07691	0.695178	0.937714	0.206009
11322	Regions/COXKO	11713.7	14062.2	0		0.550726	0.632897	0.107179	0.739836	1.07755	0.172428	0.283532	1.42543	3.0019	0.527457	1.21682	0.295662
11323	Regions/COXKO	11793.7	14062.2	0		0.633599	0.717349	0.109167	0.392482	1.39425	0.0168759	0.0236156	1.31195	3.38423	0.503129	1.09862	0.148697
11324	Regions/COXKO	11873.7	14062.2	0		0.51748	0.724231	0.145554	0.778911	1.10209	0.0248822	0.0297377	1.22165	3.00013	0.0469007	0.533307	0.168207
11325	Regions/COXKO	11953.7	14062.2	0		0.618839	0.790754	0.143624	0.73847	1.45567	0.0249371	0.0303801	1.11833	2.96861	0.0566676	0.583512	0.153845
11326	Regions/COXKO	12033.7	14062.2	0		0.645576	0.897521	0.13074	19.738	1.08469	0.298832	0.355235	1.15744	3.38981	1.20983	0.559677	0.254461
11344	Regions/COXKO	10433.7	13982.2	0		0.616944	1.07933	0.151616	1.15085	1.10523	0.0336198	0.0325146	0.92308	3.05049	0.0774338	0.565122	0.225245
11345	Regions/COXKO	10513.7	13982.2	0		0.558834	0.78921	0.133046	0.690983	1.24745	0.158611	0.186155	1.27523	2.803	0.379567	0.560571	0.129464
11346	Regions/COXKO	10593.7	13982.2	0		0.588687	0.880523	0.159158	0.824152	1.15002	0.209151	0.223005	1.10213	2.63714	0.534433	0.587439	0.151301
11347	Regions/COXKO	10673.7	13982.2	0		0.585127	0.722474	0.0891853	0.825246	1.18811	0.219738	0.226183	1.17148	2.57003	0.325291	0.710286	0.165695
11348	Regions/COXKO	10753.7	13982.2	0		0.528657	0.549258	0.0880975	0.961427	1.47411	0.17088	0.142254	1.57413	3.45426	0.549892	1.11598	0.272614
11349	Regions/COXKO	10833.7	13982.2	0		0.554366	0.56064	0.134676	0.743026	1.369	0.198083	0.173996	1.61442	3.27523	0.366404	0.780349	0.185088
11350	Regions/COXKO	10913.7	13982.2	0		0.580039	0.647754	0.134618	0.809231	1.26706	0.251323	0.360616	1.16983	2.65909	0.359275	0.937315	0.233483
11351	Regions/COXKO	10993.7	13982.2	0		0.539112	0.604236	0.0993168	0.950054	1.64835	0.155407	0.134508	1.54636	3.47817	0.545798	0.699429	0.181871
11352	Regions/COXKO	11073.7	13982.2	0		0.61168	0.616175	0.13165	0.795575	1.49206	0.0204062	0.0154605	1.681	3.76077	0.60051	0.929221	0.205208
11353	Regions/COXKO	11153.7	13982.2	0		0.57401	0.670862	0.123319	0.392287	1.54147	0.190716	0.285252	1.32477	3.2584	0.439308	1.15464	0.173366
11354	Regions/COXKO	11233.7	13982.2	0		0.570388	0.666776	0.119739	0.664282	1.4204	0.223721	0.221794	1.47489	3.50508	0.435279	1.05941	0.190062
11355	Regions/COXKO	11313.7	13982.2	0		0.635009	0.548034	0.108342	0.910132	1.68584	0.0182852	0.0194071	1.7457	4.62625	0.381621	0.817857	0.221612
11356	Regions/COXKO	11393.7	13982.2	0		0.566127	0.59346	0.108019	0.864532	1.34452	0.220081	0.156467	1.62151	3.53962	0.647969	0.751959	0.175528
11357	Regions/COXKO	11473.7	13982.2	0		0.627553	0.7303	0.121101	1.01505	1.54065	0.190134	0.182705	1.30597	3.16002	1.0626	0.734133	0.175916
11358	Regions/COXKO	11553.7	13982.2	0		0.58747	0.636478	0.129944	1.07889	1.3086	0.132381	0.108409	1.55784	3.25292	0.71236	0.70743	0.221856
11359	Regions/COXKO	11633.7	13982.2	0		0.61898	0.704444	0.103735	0.78613	1.60047	0.231449	0.291742	1.23897	3.06316	0.553563	0.707852	0.162724
11360	Regions/COXKO	11713.7	13982.2	0		0.79935	0.996468	0.0981198	0.987543	1.28081	0.205248	0.251242	0.916377	3.74022	0.0821468	0.662683	0.234682
11361	Regions/COXKO	11793.7	13982.2	0		0.652804	0.917353	0.131594	0.71171	1.32496	0.22768	0.234206	1.03874	3.44611	0.0447459	0.409202	0.140297
11362	Regions/COXKO	11873.7	13982.2	0		0.619174	0.65976	0.15308	0.612139	1.47497	0.123922	0.119775	1.39113	3.29351	0.409307	0.818418	0.181364
11363	Regions/COXKO	11953.7	13982.2	0		0.606377	0.718158	0.137529	0.777853	1.53412	0.158467	0.163685	1.39462	3.42342	0.525966	0.792241	0.154993
11364	Regions/COXKO	12033.7	13982.2	0		0.832445	0.886411	0.116777	0.712674	1.14186	0.258782	0.314773	1.2134	3.24573	0.0556808	0.634405	0.14646
11381	Regions/COXKO	10353.7	13902.2	0		1.28467	0.901751	0.0253851	1.07476	0.0518408	1.08278	1.08419	1.46547	42.3372	1.20983	0.0426458	0.0354222
11382	Regions/COXKO	10433.7	13902.2	0		0.594339	1.00305	0.171952	0.756238	0.976417	0.292143	0.272107	1.03121	2.86343	0.0703321	0.612795	0.161117
11383	Regions/COXKO	10513.7	13902.2	0		0.622601	0.846691	0.155214	0.992053	1.53107	0.19198	0.220286	1.39055	3.31032	0.554041	0.596636	0.143144
11384	Regions/COXKO	10593.7	13902.2	0		0.589514	0.734129	0.110526	0.580837	1.57188	0.135853	0.121332	1.2034	2.54297	0.239655	0.660875	0.142048
11385	Regions/COXKO	10673.7	13902.2	0		0.570576	0.649882	0.117837	0.784358	1.61657	0.256238	0.211577	1.46572	3.14331	0.444793	0.718753	0.217057
11386	Regions/COXKO	10753.7	13902.2	0		0.532684	0.673662	0.103531	0.761644	1.33989	0.135061	0.127184	1.55357	3.08445	0.320161	0.707692	0.183914
11387	Regions/COXKO	10833.7	13902.2	0		0.65849	1.05047	0.127494	0.697714	1.27518	0.219958	0.253728	0.937066	2.90788	0.399434	0.364192	0.105253
11388	Regions/COXKO	10913.7	13902.2	0		0.574792	0.865748	0.164971	0.709203	1.31821	0.0219757	0.0427259	0.944204	2.33256	0.0546961	0.721319	0.214756
11389	Regions/COXKO	10993.7	13902.2	0		0.636225	0.681653	0.106752	0.7912	1.18202	0.16151	0.243623	1.23381	2.8552	0.534469	0.833048	0.19775
11390	Regions/COXKO	11073.7	13902.2	0		0.612081	0.782976	0.0960531	0.598188	1.13521	0.206605	0.280766	1.08098	2.74653	0.372184	0.720173	0.141937
11391	Regions/COXKO	11153.7	13902.2	0		0.732272	0.858551	0.14367	1.2317	1.56452	0.197476	0.179296	1.15203	3.04004	0.488091	0.531104	0.153223
11392	Regions/COXKO	11233.7	13902.2	0		0.5926	0.761716	0.150605	0.562819	1.2321	0.190759	0.211707	1.11696	2.91913	0.496025	0.589548	0.107108
11393	Regions/COXKO	11313.7	13902.2	0		0.559929	0.597747	0.110517	0.883908	1.25395	0.160837	0.136084	1.57726	3.40217	0.651293	0.794833	0.211386
11394	Regions/COXKO	11393.7	13902.2	0		0.513317	0.600044	0.106597	0.99461	1.57628	0.172498	0.152734	1.54344	3.01778	0.687977	0.702961	0.20434
11395	Regions/COXKO	11473.7	13902.2	0		0.51081	0.537239	0.0910167	0.856983	1.42979	0.20618	0.173398	1.63289	3.66617	0.499187	1.09288	0.2708
11396	Regions/COXKO	11553.7	13902.2	0		0.602773	0.577267	0.113685	0.747928	1.67793	0.0137065	0.015011	1.71626	3.49878	0.521353	0.787294	0.175234
11397	Regions/COXKO	11633.7	13902.2	0		0.661517	1.01539	0.110191	0.791553	1.2242	0.253973	0.283195	0.941688	3.11157	0.412446	0.692523	0.222908
11398	Regions/COXKO	11713.7	13902.2	0		0.677772	0.935561	0.155649	0.828872	1.1652	0.252439	0.249823	1.15929	3.55999	0.494453	0.593736	0.13122
11399	Regions/COXKO	11793.7	13902.2	0		0.538544	0.555065	0.0929265	0.927651	1.70354	0.0185059	0.0164057	1.84664	3.25047	0.0412127	0.75553	0.209612
11400	Regions/COXKO	11873.7	13902.2	0		0.642241	0.855754	0.188483	0.982697	1.23982	0.236963	0.265957	1.18926	2.73816	0.054069	0.513616	0.171151
11401	Regions/COXKO	11953.7	13902.2	0		0.579006	0.750231	0.13089	0.903547	1.4854	0.0264563	0.0293276	1.21735	2.80589	0.966214	0.673262	0.145571
11402	Regions/COXKO	12033.7	13902.2	0		0.665551	0.826375	0.146239	0.808008	1.17331	0.303236	0.388225	1.26073	2.89656	0.0510027	0.957427	0.247267
11419	Regions/COXKO	10353.7	13822.2	0		0.582855	0.838888	0.15569	0.954437	1.24734	0.0250873	0.0486772	1.02346	3.29844	0.0816714	0.853771	0.236985
11420	Regions/COXKO	10433.7	13822.2	0		0.578122	0.796213	0.139015	1.03161	1.32207	0.236487	0.333059	1.18659	3.11838	0.0465578	0.647103	0.190218
11421	Regions/COXKO	10513.7	13822.2	0		0.532211	0.730711	0.121852	0.753111	1.41606	0.166122	0.166129	1.29125	2.84447	0.506975	0.638105	0.160953
11422	Regions/COXKO	10593.7	13822.2	0		0.584612	0.619288	0.110699	0.734815	1.66768	0.119307	0.10512	1.58168	3.40809	0.478571	0.681939	0.131758
11423	Regions/COXKO	10673.7	13822.2	0		0.624532	0.712887	0.13483	0.623052	1.05978	0.255427	0.276599	1.2262	2.47067	0.37652	0.634999	0.142839
11424	Regions/COXKO	10753.7	13822.2	0		0.620743	0.75505	0.119081	0.578328	1.22207	0.146684	0.168928	1.06909	2.39315	0.373698	0.532126	0.119952
11425	Regions/COXKO	10833.7	13822.2	0		0.586702	0.743181	0.121496	0.785813	1.41117	0.166701	0.12324	1.34146	3.18919	0.543805	0.705478	0.19634
11426	Regions/COXKO	10913.7	13822.2	0		0.601176	0.75784	0.157889	1.06851	1.4503	0.285434	0.21551	1.34692	2.79819	0.562304	0.618463	0.228141
11427	Regions/COXKO	10993.7	13822.2	0		0.556168	0.749615	0.143132	0.924955	1.11454	0.361836	0.333212	1.49423	3.22253	0.0426621	0.783926	0.258068
11428	Regions/COXKO	11073.7	13822.2	0		0.556792	0.820587	0.115919	0.779719	1.26909	0.0259836	0.0292954	1.35462	2.78934	0.0565047	0.817162	0.207004
11429	Regions/COXKO	11153.7	13822.2	0		0.581066	0.70096	0.107789	0.680527	1.07544	0.178761	0.181635	1.35449	3.10285	0.338732	0.819809	0.173772
11430	Regions/COXKO	11233.7	13822.2	0		0.62936	0.70192	0.207508	1.13815	1.16735	0.340358	0.262767	1.53038	3.76656	0.656095	0.801934	0.287859
11431	Regions/COXKO	11313.7	13822.2	0		0.559957	0.612312	0.129046	1.48847	1.60695	0.0185408	0.0182311	1.61317	3.64401	0.862812	0.835954	0.258211
11432	Regions/COXKO	11393.7	13822.2	0		0.495801	0.595075	0.0939206	1.41824	1.3974	0.157831	0.144927	1.68808	3.5913	0.855474	0.765512	0.240882
11433	Regions/COXKO	11473.7	13822.2	0		0.509137	0.656213	0.133096	0.622847	1.48112	0.147378	0.163376	1.49302	3.78782	0.535454	0.988512	0.207798
11434	Regions/COXKO	11553.7	13822.2	0		0.54557	0.628329	0.123894	1.04647	1.33874	0.198096	0.172822	1.68468	4.39746	0.73998	0.912018	0.249748
11435	Regions/COXKO	11633.7	13822.2	0		0.605708	0.689079	0.0897162	0.954722	1.20292	0.182811	0.256797	1.33883	3.15705	0.372839	0.866521	0.214195
11436	Regions/COXKO	11713.7	13822.2	0		0.590254	0.620744	0.116432	0.843533	1.67551	0.15813	0.183077	1.53312	3.46403	0.531469	0.689598	0.205034
11437	Regions/COXKO	11793.7	13822.2	0		0.547309	0.568133	0.105958	0.811384	1.50084	0.125452	0.12497	1.65087	3.32346	0.719311	1.06202	0.219318
11438	Regions/COXKO	11873.7	13822.2	0		0.558141	0.604449	0.0998598	0.866805	1.499	0.19592	0.221224	1.4976	3.26633	0.507163	0.847302	0.228885
11439	Regions/COXKO	11953.7	13822.2	0		0.631535	0.762857	0.149133	0.937364	1.30658	0.238471	0.318259	1.2698	2.90487	0.476255	0.668686	0.182167
11440	Regions/COXKO	12033.7	13822.2	0		0.650736	0.881455	0.116316	0.764648	0.93669	0.194616	0.271591	1.06625	3.20899	0.455127	0.829765	0.200858
11457	Regions/COXKO	10353.7	13742.2	0		0.612137	1.12667	0.125527	1.07476	1.37408	0.0350863	0.0833488	0.945033	3.60667	1.20983	0.66366	0.0244094
11458	Regions/COXKO	10433.7	13742.2	0		0.595762	0.791211	0.144559	0.93451	1.55284	0.0183753	0.0179865	1.13585	2.73839	0.750093	0.492948	0.12552
11459	Regions/COXKO	10513.7	13742.2	0		0.560807	0.690798	0.136956	0.863708	1.51105	0.184189	0.168144	1.51513	3.32857	0.0346972	0.727684	0.205715
11460	Regions/COXKO	10593.7	13742.2	0		0.654211	0.823349	0.125607	1.2074	1.66921	0.125682	0.133339	1.20088	2.92421	0.373227	0.443865	0.159787
11461	Regions/COXKO	10673.7	13742.2	0		0.565041	0.736226	0.103823	0.738293	1.33652	0.19077	0.193643	1.30114	2.68706	0.397732	0.632286	0.14293
11462	Regions/COXKO	10753.7	13742.2	0		0.59531	0.683364	0.119424	0.501857	1.10934	0.181524	0.201354	1.25839	2.81081	0.343566	0.638765	0.12045
11463	Regions/COXKO	10833.7	13742.2	0		0.657724	0.693182	0.141042	0.749619	1.20344	0.356468	0.364036	1.18303	2.99673	0.346176	0.575653	0.181254
11464	Regions/COXKO	10913.7	13742.2	0		0.558955	0.613802	0.102494	0.746642	1.49622	0.173841	0.130146	1.64103	3.01774	0.544722	0.837237	0.170356
11465	Regions/COXKO	10993.7	13742.2	0		0.667282	0.594989	0.135276	0.656901	1.45931	0.19922	0.204236	1.69033	3.94113	0.569145	0.744581	0.179282
11466	Regions/COXKO	11073.7	13742.2	0		0.660659	0.762924	0.149708	1.12733	1.34257	0.0231285	0.0225114	1.49104	3.3372	0.062283	0.777905	0.216916
11467	Regions/COXKO	11153.7	13742.2	0		0.667696	1.1048	0.142471	1.2688	1.03921	0.0236035	0.024798	0.951666	2.93643	0.78559	0.454861	0.144403
11468	Regions/COXKO	11233.7	13742.2	0		0.578407	0.630572	0.150764	0.920314	1.33307	0.198083	0.196604	1.48145	2.92524	0.557087	0.880912	0.227631
11469	Regions/COXKO	11313.7	13742.2	0		0.564637	0.592482	0.148537	0.746615	1.67401	0.207932	0.197875	1.67303	3.59137	0.489801	0.895838	0.27216
11470	Regions/COXKO	11393.7	13742.2	0		0.607359	0.867611	0.12997	1.33725	1.28252	0.0276681	0.0282818	1.08945	3.30051	0.0718928	0.647795	0.211325
11471	Regions/COXKO	11473.7	13742.2	0		0.627704	0.925878	0.173873	0.0449139	1.15811	0.0241881	0.025034	1.2104	3.36877	0.520484	0.87525	0.0144949
11472	Regions/COXKO	11553.7	13742.2	0		0.594779	0.763647	0.0869889	0.657145	1.04713	0.208735	0.364776	1.10255	2.60163	0.565012	1.00019	0.230053
11473	Regions/COXKO	11633.7	13742.2	0		0.593014	0.747742	0.139538	1.01809	1.24991	0.175091	0.172296	1.42293	3.42621	0.524169	0.912233	0.237783
11474	Regions/COXKO	11713.7	13742.2	0		0.572881	0.835475	0.171823	19.568	0.787903	0.0378137	0.0424673	1.09519	3.28485	1.20983	0.642593	0.265847
11475	Regions/COXKO	11793.7	13742.2	0		0.639919	0.608221	0.124752	0.936968	1.16683	0.018984	0.0209143	1.5103	3.27948	0.416867	0.86035	0.244982
11476	Regions/COXKO	11873.7	13742.2	0		0.657704	0.676944	0.142337	0.845037	1.41675	0.17624	0.176053	1.4108	3.01851	0.434595	0.663482	0.186952
11477	Regions/COXKO	11953.7	13742.2	0		0.68757	0.818972	0.144832	0.815865	1.40523	0.31126	0.352391	1.03356	2.96983	0.0440772	0.483609	0.21478
11478	Regions/COXKO	12033.7	13742.2	0		0.652502	0.712867	0.109056	0.955307	1.51663	0.21945	0.252264	1.40456	3.64637	0.605231	0.887186	0.233155
11497	Regions/COXKO	10433.7	13662.2	0		0.609331	0.76567	0.137254	1.02006	1.17191	0.251772	0.225719	1.346	3.21577	0.0620235	0.833994	0.196571
11498	Regions/COXKO	10513.7	13662.2	0		0.583849	0.638293	0.126329	0.877607	1.27358	0.152005	0.153666	1.64991	3.82899	0.563687	0.517277	0.126517
11499	Regions/COXKO	10593.7	13662.2	0		0.536121	0.636573	0.142731	1.00351	1.49577	0.247057	0.203132	1.56815	3.06498	0.48283	0.721006	0.198543
11500	Regions/COXKO	10673.7	13662.2	0		0.641366	0.833638	0.137293	0.692609	1.52526	0.136809	0.132556	1.1543	3.01066	0.569696	0.582941	0.124148
11501	Regions/COXKO	10753.7	13662.2	0		0.612411	0.78256	0.125448	0.782307	1.17957	0.231623	0.202634	1.12698	2.36016	0.336504	0.580866	0.181462
11502	Regions/COXKO	10833.7	13662.2	0		0.638042	0.646127	0.139507	0.797075	1.58165	0.330212	0.329599	1.18893	2.94429	0.0526699	0.529427	0.176782
11503	Regions/COXKO	10913.7	13662.2	0		0.66299	0.777422	0.14116	0.569716	1.32389	0.216938	0.192222	1.28369	3.17111	0.430152	0.714109	0.126456
11504	Regions/COXKO	10993.7	13662.2	0		0.660979	0.71652	0.151511	0.0380931	1.19658	0.0345648	0.0311223	1.27355	2.89046	0.0428808	1.03461	0.0166655
11505	Regions/COXKO	11073.7	13662.2	0		0.666623	1.09484	0.140134	0.623271	1.02871	0.197407	0.201147	0.958779	2.97455	0.50443	0.509718	0.1203
11506	Regions/COXKO	11153.7	13662.2	0		0.586945	1.01895	0.16309	0.619924	1.19141	0.240413	0.277807	1.06753	2.62498	0.478544	0.536316	0.14089
11507	Regions/COXKO	11233.7	13662.2	0		0.572913	0.643353	0.154574	0.602938	1.41892	0.245175	0.198293	1.46847	3.0791	0.584237	0.650852	0.151618
11508	Regions/COXKO	11313.7	13662.2	0		0.649187	0.574493	0.084006	0.724487	1.46758	0.154894	0.1531	1.63857	3.59265	0.576598	0.898773	0.141361
11509	Regions/COXKO	11393.7	13662.2	0		0.703447	0.89706	0.138359	0.612256	1.34879	0.203597	0.171342	1.17263	3.26227	0.0476174	0.486162	0.116014
11510	Regions/COXKO	11473.7	13662.2	0		0.548764	0.634973	0.122868	0.762301	1.46189	0.192808	0.233447	1.57868	3.48023	0.365444	0.801667	0.21086
11511	Regions/COXKO	11553.7	13662.2	0		0.615932	0.939194	0.12638	0.86392	1.31185	0.155487	0.168052	0.963587	2.58498	0.534463	0.603416	0.220194
11512	Regions/COXKO	11633.7	13662.2	0		0.536227	0.537833	0.116575	0.787132	1.61674	0.125685	0.105993	1.82219	4.14893	0.634528	1.29633	0.25842
11513	Regions/COXKO	11713.7	13662.2	0		0.675163	0.66176	0.139769	1.2704	1.57196	0.0345263	0.0478896	1.43695	3.10762	0.0818971	0.919995	0.285096
11514	Regions/COXKO	11793.7	13662.2	0		0.599534	0.547079	0.118952	0.753782	1.47415	0.12146	0.103899	1.77824	3.85259	0.630016	1.02155	0.240816
11515	Regions/COXKO	11873.7	13662.2	0		0.669647	0.743211	0.108498	0.750614	1.19363	0.132001	0.158048	1.26369	3.41859	0.0393848	0.689557	0.191536
11516	Regions/COXKO	11953.7	13662.2	0		0.610688	0.557958	0.113255	1.09114	1.44393	0.015606	0.0155838	1.88537	4.17905	0.552681	1.11687	0.25369
11517	Regions/COXKO	12033.7	13662.2	0		0.647867	0.756202	0.182278	1.29006	1.25584	0.328734	0.323417	1.47422	3.30715	0.645031	0.749918	0.270883
11537	Regions/COXKO	10433.7	13582.2	0		0.544998	0.781124	0.174246	0.577633	1.62461	0.0214018	0.025316	1.17905	2.98847	0.0486293	0.645787	0.132083
11538	Regions/COXKO	10513.7	13582.2	0		0.511085	0.638257	0.107777	0.686428	1.4463	0.180393	0.163968	1.47261	3.01391	0.384823	0.792347	0.138006
11539	Regions/COXKO	10593.7	13582.2	0		0.537351	0.59437	0.123292	0.979194	1.54678	0.168211	0.144291	1.55324	3.13106	0.672538	0.775534	0.219679
11540	Regions/COXKO	10673.7	13582.2	0		0.607633	1.12036	0.119258	0.762484	1.18803	0.305413	0.307772	0.861103	2.74373	0.0557249	0.472429	0.142678
11541	Regions/COXKO	10753.7	13582.2	0		0.611545	0.880839	0.124528	1.63609	1.41749	0.0296041	0.0588962	1.11659	3.00536	0.0889718	0.529252	0.32024
11542	Regions/COXKO	10833.7	13582.2	0		0.663701	0.7442	0.104087	0.532345	1.44567	0.150302	0.141826	1.50599	3.40502	0.442777	0.546376	0.0986518
11543	Regions/COXKO	10913.7	13582.2	0		0.568255	1.0228	0.167684	0.74134	1.03142	0.25189	0.271989	0.963922	2.44267	0.316455	0.497998	0.14633
11544	Regions/COXKO	10993.7	13582.2	0		0.593291	0.896379	0.189749	1.05128	0.936569	0.0369962	0.0297719	1.15254	2.48392	0.0628764	0.635987	0.241796
11545	Regions/COXKO	11073.7	13582.2	0		0.594383	0.819126	0.158006	1.0567	1.08739	0.165366	0.198867	1.14289	2.54301	0.741645	0.496562	0.168185
11546	Regions/COXKO	11153.7	13582.2	0		0.540786	0.80181	0.156035	0.938731	0.919173	0.0189777	0.0236222	1.18834	2.61133	0.0546742	0.689495	0.180892
11547	Regions/COXKO	11233.7	13582.2	0		0.473165	0.702546	0.111869	0.920345	1.43667	0.0228589	0.028127	1.2494	2.548	0.0521844	0.6182	0.186008
11548	Regions/COXKO	11313.7	13582.2	0		0.655249	0.634164	0.131942	0.776703	1.5975	0.202617	0.18657	1.41535	3.12684	0.443583	0.771216	0.191277
11549	Regions/COXKO	11393.7	13582.2	0		0.624472	0.843232	0.131183	0.881107	1.43761	0.187445	0.199216	1.18208	2.78834	0.561643	0.5893	0.175355
11550	Regions/COXKO	11473.7	13582.2	0		0.505356	0.687347	0.109009	0.975719	1.43641	0.207277	0.183103	1.48492	3.48711	0.666261	0.865933	0.231488
11551	Regions/COXKO	11553.7	13582.2	0		0.649526	0.755891	0.0938824	0.554653	1.09686	0.279209	0.458863	1.09202	2.53029	0.422846	0.993519	0.187027
11552	Regions/COXKO	11633.7	13582.2	0		0.554977	0.57671	0.101649	0.907545	1.53691	0.0162132	0.0127581	1.65666	4.30855	0.461634	1.07164	0.223552
11553	Regions/COXKO	11713.7	13582.2	0		0.629999	0.614897	0.132931	0.986271	1.41612	0.161366	0.145673	1.59345	3.15194	0.536787	1.02883	0.244455
11554	Regions/COXKO	11793.7	13582.2	0		0.662063	0.65491	0.107203	1.00282	1.38991	0.176201	0.17708	1.51761	3.67143	0.552611	0.782653	0.1781
11555	Regions/COXKO	11873.7	13582.2	0		0.537849	0.609107	0.139294	0.779939	1.53167	0.224905	0.212261	1.59112	3.09474	0.358845	0.816971	0.193229
11556	Regions/COXKO	11953.7	13582.2	0		0.608963	0.639854	0.147009	1.16212	1.838	0.148769	0.141633	1.71346	3.85989	0.433486	1.00162	0.329656
11557	Regions/COXKO	12033.7	13582.2	0		0.654221	0.677752	0.116686	1.39502	1.42709	0.14798	0.146532	1.37716	3.47245	0.485203	0.700932	0.251059
11578	Regions/COXKO	10513.7	13502.2	0		0.570896	0.634396	0.138744	1.18999	1.6161	0.18423	0.167731	1.54965	3.1738	0.592845	0.689527	0.180896
11579	Regions/COXKO	10593.7	13502.2	0		0.67128	0.854996	0.135055	1.00221	1.47384	0.196055	0.206798	1.14911	2.95312	0.794671	0.544057	0.152613
11580	Regions/COXKO	10673.7	13502.2	0		0.590338	0.971334	0.253365	0.0540142	1.77448	0.0596348	0.0307801	0.908092	2.06951	0.0608028	0.0265794	0.0220772
11581	Regions/COXKO	10753.7	13502.2	0		0.789218	1.20727	0.361583	1.07476	26.6842	0.0375698	0.0431469	0.788737	2.31963	1.20983	0.454822	0.0157885
11582	Regions/COXKO	10833.7	13502.2	0		0.656551	0.984027	0.145383	0.809326	1.20662	0.312046	0.314917	0.932629	2.35205	0.348222	0.51094	0.192441
11583	Regions/COXKO	10913.7	13502.2	0		0.575879	0.690232	0.152814	0.859017	1.20025	0.200238	0.200323	1.3506	2.59024	0.572038	0.633391	0.152904
11584	Regions/COXKO	10993.7	13502.2	0		0.61327	0.659866	0.140882	0.867597	1.35438	0.171015	0.168982	1.37445	2.82955	0.467023	0.611849	0.17176
11585	Regions/COXKO	11073.7	13502.2	0		0.657486	0.784454	0.187219	0.0549404	1.42474	0.0365721	0.0251998	1.20712	2.37471	0.0618454	0.575965	0.0106627
11586	Regions/COXKO	11153.7	13502.2	0		0.59505	0.667009	0.121948	0.756278	1.5456	0.156706	0.156987	1.40031	3.07626	0.447186	0.719745	0.157485
11587	Regions/COXKO	11233.7	13502.2	0		0.576896	0.619457	0.127289	0.684942	1.57669	0.213396	0.224107	1.5442	3.15612	0.433911	0.521371	0.138394
11588	Regions/COXKO	11313.7	13502.2	0		0.471338	0.533345	0.0984965	1.0032	1.36241	0.164	0.135654	1.78306	3.4469	1.03882	0.922067	0.233501
11589	Regions/COXKO	11393.7	13502.2	0		0.68368	0.770631	0.121327	0.661804	1.08057	0.253735	0.317602	1.10583	2.57148	0.0406073	0.833907	0.185167
11590	Regions/COXKO	11473.7	13502.2	0		0.702958	0.809199	0.0771201	0.872249	1.57107	0.155777	0.180676	1.0912	3.00465	0.554203	0.76824	0.184992
11591	Regions/COXKO	11553.7	13502.2	0		0.614306	0.840821	0.113076	0.838542	1.56569	0.0211494	0.0251641	1.07238	3.0754	0.86742	0.618009	0.186789
11592	Regions/COXKO	11633.7	13502.2	0		0.541883	0.597241	0.134748	0.918074	1.53799	0.2204	0.177933	1.65041	2.91251	0.608715	0.826909	0.205423
11593	Regions/COXKO	11713.7	13502.2	0		0.592191	0.676223	0.108676	0.848389	1.36258	0.176632	0.163939	1.39205	3.33797	0.36691	0.768114	0.225162
11594	Regions/COXKO	11793.7	13502.2	0		0.575915	0.597634	0.108057	0.763213	1.3425	0.206826	0.221616	1.4105	2.68368	0.363517	0.827813	0.205359
11595	Regions/COXKO	11873.7	13502.2	0		0.635925	0.699374	0.115218	0.706637	1.1414	0.144733	0.134538	1.28422	3.37298	0.379101	0.682776	0.180184
11596	Regions/COXKO	11953.7	13502.2	0		0.549342	0.6569	0.119726	0.845493	1.52923	0.182204	0.18037	1.5072	3.42066	0.67571	0.75837	0.194763
11597	Regions/COXKO	12033.7	13502.2	0		0.601656	0.872205	0.127048	1.06734	1.5157	0.198256	0.226018	1.19048	2.90172	0.542092	0.728036	0.21527
11618	Regions/COXKO	10513.7	13422.2	0		0.669888	0.935086	0.120285	1.09344	1.36622	0.0324465	0.0300594	0.981781	2.72789	0.0708762	0.533896	0.221592
11619	Regions/COXKO	10593.7	13422.2	0		0.55612	0.760894	0.128861	0.741463	1.43892	0.0160295	0.0152443	1.13479	2.65304	0.399841	0.660872	0.141083
11620	Regions/COXKO	10673.7	13422.2	0		0.690051	1.04153	0.166004	0.0585537	0.977422	0.0411393	0.0420926	0.964633	3.17988	0.0659129	0.619435	0.0153329
11621	Regions/COXKO	10753.7	13422.2	0		0.831995	1.40083	0.142096	0.808502	0.906075	0.237851	0.379058	0.702136	2.65822	0.0960236	0.300047	0.100331
11622	Regions/COXKO	10833.7	13422.2	0		0.883064	1.1751	0.031636	1.07476	17.9472	1.08278	1.08419	1.14127	37.1743	1.20983	13.0827	0.654784
11623	Regions/COXKO	10913.7	13422.2	0		0.548256	0.657135	0.120657	0.840867	1.27778	0.207916	0.166768	1.43433	3.52788	0.342573	1.00464	0.236797
11624	Regions/COXKO	10993.7	13422.2	0		0.579184	0.620139	0.133468	0.861056	1.73245	0.148431	0.12758	1.50994	3.24789	0.570809	0.778098	0.179681
11625	Regions/COXKO	11073.7	13422.2	0		0.524602	0.586613	0.140069	0.844807	1.3976	0.0203539	0.0184675	1.58602	3.5544	0.0462838	0.705989	0.180851
11626	Regions/COXKO	11153.7	13422.2	0		0.508346	0.604458	0.10646	0.752163	1.41624	0.141763	0.140497	1.56318	3.2619	0.560279	0.810448	0.152403
11627	Regions/COXKO	11233.7	13422.2	0		0.535477	0.597278	0.136505	0.934011	1.16445	0.0221135	0.0236703	1.33426	2.48378	0.0452455	0.793776	0.243676
11628	Regions/COXKO	11313.7	13422.2	0		0.601722	0.654458	0.11499	0.848347	1.61808	0.0159719	0.0145674	1.35662	3.4491	0.512306	0.767571	0.18303
11629	Regions/COXKO	11393.7	13422.2	0		0.636305	0.677044	0.138326	0.744378	1.19502	0.242154	0.232035	1.37069	3.48804	0.479347	0.921834	0.207382
11630	Regions/COXKO	11473.7	13422.2	0		0.59815	0.593931	0.139634	1.02441	1.72796	0.0152844	0.0136683	1.78856	3.94084	0.417292	1.00707	0.287488
11631	Regions/COXKO	11553.7	13422.2	0		0.630386	0.59419	0.122462	1.04272	1.34923	0.0184815	0.0170671	1.53671	2.79483	0.451216	0.684644	0.220608
11632	Regions/COXKO	11633.7	13422.2	0		0.587102	0.617074	0.111197	0.824846	1.29837	0.138184	0.113663	1.49692	3.07199	0.627162	0.818141	0.216752
11633	Regions/COXKO	11713.7	13422.2	0		0.667887	0.686121	0.152053	0.509795	1.24959	0.178548	0.228669	1.34756	2.79731	0.3653	0.69138	0.144545
11634	Regions/COXKO	11793.7	13422.2	0		0.547447	0.6781	0.0935866	0.515953	1.3934	0.137559	0.165007	1.3082	2.74706	0.375816	0.945667	0.151388
11635	Regions/COXKO	11873.7	13422.2	0		0.665712	0.845727	0.127469	0.791723	1.00627	0.261143	0.281763	1.09834	3.04703	0.494461	0.499023	0.140897
11636	Regions/COXKO	11953.7	13422.2	0		0.656413	0.704242	0.145663	0.997796	1.15019	0.255999	0.238334	1.42422	2.92162	0.431771	0.772799	0.226423
11637	Regions/COXKO	12033.7	13422.2	0		0.644099	0.915118	0.103107	1.05683	1.28983	0.185251	0.219042	0.98709	2.91788	0.398289	0.551888	0.163632
11658	Regions/COXKO	10513.7	13342.2	0		0.558457	0.868198	0.15944	0.643783	1.19312	0.314243	0.356669	1.20131	2.92376	0.0696489	0.761811	0.142487
11659	Regions/COXKO	10593.7	13342.2	0		0.556018	0.773045	0.150274	0.805673	1.14136	0.180563	0.159889	1.26836	3.01252	0.475072	0.679616	0.18864
11660	Regions/COXKO	10673.7	13342.2	0		0.604913	0.744258	0.138279	0.721276	1.40592	0.268617	0.245907	1.36496	2.82382	0.348453	0.565326	0.13226
11661	Regions/COXKO	10753.7	13342.2	0		0.530445	1.35248	0.174517	1.02234	1.24545	0.0607091	0.0716045	0.846304	3.50464	0.101749	0.599615	0.213024
11662	Regions/COXKO	10833.7	13342.2	0		0.77693	1.07256	0.170595	0.0820314	0.844205	0.0387415	0.0513936	0.874609	2.78824	0.0923414	0.559178	0.018686
11663	Regions/COXKO	10913.7	13342.2	0		0.602581	1.04786	0.130216	0.767973	1.07704	0.202011	0.192421	0.911154	2.80491	0.484206	0.347931	0.123674
11664	Regions/COXKO	10993.7	13342.2	0		0.514042	0.621065	0.122604	0.922042	1.40509	0.141288	0.115555	1.5163	3.28751	0.569062	0.845164	0.22206
11665	Regions/COXKO	11073.7	13342.2	0		0.48351	0.612337	0.126822	1.0876	1.31172	0.184929	0.145091	1.49313	3.38585	0.502716	0.757284	0.235763
11666	Regions/COXKO	11153.7	13342.2	0		0.484896	0.638754	0.120752	0.832033	1.64312	0.159928	0.158743	1.48006	3.11972	0.533604	0.707413	0.176587
11667	Regions/COXKO	11233.7	13342.2	0		0.47109	0.596364	0.135987	0.924071	1.49162	0.124208	0.126196	1.65193	4.02446	0.488406	0.8336	0.192823
11668	Regions/COXKO	11313.7	13342.2	0		0.563929	0.629335	0.124415	1.08086	1.52959	0.18124	0.207064	1.36687	3.21917	0.552185	0.698099	0.202186
11669	Regions/COXKO	11393.7	13342.2	0		0.62253	0.645342	0.0959916	0.723714	1.55012	0.222147	0.179837	1.59051	3.56774	0.5031	0.942202	0.197339
11670	Regions/COXKO	11473.7	13342.2	0		0.641573	0.730897	0.125769	0.871967	1.59682	0.112728	0.120881	1.31023	4.15244	0.488605	0.865596	0.186224
11671	Regions/COXKO	11553.7	13342.2	0		0.635143	0.65458	0.124103	0.860652	1.35509	0.0218271	0.0175776	1.46646	3.29689	0.49174	0.676031	0.196635
11672	Regions/COXKO	11633.7	13342.2	0		0.613023	0.628044	0.125978	0.884973	1.41768	0.179946	0.194534	1.50482	2.88239	0.352383	0.896439	0.276137
11673	Regions/COXKO	11713.7	13342.2	0		0.7142	0.808941	0.136443	1.39616	1.58513	0.467139	0.480267	1.31615	3.09266	0.0938987	0.537128	0.193508
11674	Regions/COXKO	11793.7	13342.2	0		0.588512	0.721195	0.127543	0.909088	1.11362	0.178046	0.180195	1.30362	2.70954	0.526205	0.686126	0.192395
11675	Regions/COXKO	11873.7	13342.2	0		0.584699	0.696799	0.137644	0.920626	1.22693	0.184197	0.176447	1.60834	3.31348	0.435216	0.849825	0.250854
11676	Regions/COXKO	11953.7	13342.2	0		0.678337	0.796862	0.161083	0.573859	1.15768	0.0203026	0.0257777	1.24522	2.9785	0.0335032	0.774562	0.182255
11677	Regions/COXKO	12033.7	13342.2	0		0.629942	0.818796	0.14716	0.96869	1.26764	0.152509	0.175516	1.30426	3.28006	0.423104	0.656662	0.205144
11678	Regions/COXKO	12113.7	13342.2	0		0.621324	0.653026	0.1172	0.68476	1.27108	0.165483	0.245969	1.28829	3.70526	0.57643	1.10626	0.215509
11698	Regions/COXKO	10593.7	13262.2	0		0.530362	0.88629	0.112489	0.799218	1.06322	0.281914	0.339705	0.985273	3.09657	0.0632438	0.697753	0.189439
11699	Regions/COXKO	10673.7	13262.2	0		0.555802	0.942755	0.158278	1.31319	1.38189	0.0273455	0.0267482	1.03839	2.70107	0.0825908	0.410263	0.173705
11700	Regions/COXKO	10753.7	13262.2	0		0.69171	1.25554	0.22022	12.7049	0.908501	0.0593947	0.0712302	0.878308	3.67243	1.20983	0.316841	0.255223
11701	Regions/COXKO	10833.7	13262.2	0		0.706798	1.18216	0.180822	1.07476	17.2918	0.0808494	1.08419	1.02402	3.61945	1.20983	0.384969	0.0342518
11702	Regions/COXKO	10913.7	13262.2	0		0.550868	0.788119	0.126775	0.629402	1.25026	0.259609	0.292552	1.15277	3.35757	0.490617	0.65226	0.144078
11703	Regions/COXKO	10993.7	13262.2	0		0.553505	0.649672	0.171934	0.794424	1.25408	0.206805	0.24334	1.33336	2.79578	0.0408839	0.679866	0.205263
11704	Regions/COXKO	11073.7	13262.2	0		0.605806	0.797406	0.0984771	0.714734	1.12098	0.258054	0.266289	1.13812	2.87925	0.0527922	0.483837	0.114801
11705	Regions/COXKO	11153.7	13262.2	0		0.515888	0.712811	0.122551	1.14715	1.37383	0.015875	0.0162641	1.38838	3.23129	0.366576	0.501321	0.168515
11706	Regions/COXKO	11233.7	13262.2	0		0.552081	0.75061	0.128978	1.11348	1.2307	0.159017	0.160575	1.27627	3.29529	0.567996	0.538557	0.157498
11707	Regions/COXKO	11313.7	13262.2	0		0.518827	0.730241	0.134472	0.91276	1.1148	0.286206	0.378456	1.18006	2.86318	0.635887	0.752305	0.181739
11708	Regions/COXKO	11393.7	13262.2	0		0.519491	0.646954	0.130064	0.825843	1.26675	0.145677	0.138499	1.64409	3.44623	0.497979	0.939389	0.229793
11709	Regions/COXKO	11473.7	13262.2	0		0.55687	0.666342	0.207793	0.0597302	1.33174	0.0212214	0.032478	1.1094	2.77563	0.0672373	0.596751	0.0106625
11710	Regions/COXKO	11553.7	13262.2	0		0.557079	0.566691	0.150273	1.13176	1.41102	0.152716	0.153858	1.76549	3.49274	0.565535	0.83616	0.231295
11711	Regions/COXKO	11633.7	13262.2	0		0.742756	0.657435	0.114285	1.09777	1.63497	0.0173247	0.0168322	1.63136	3.25315	0.645763	0.763242	0.211988
11712	Regions/COXKO	11713.7	13262.2	0		0.636698	0.578867	0.107802	0.742915	1.28588	0.185881	0.173265	1.66459	3.37333	0.470518	0.842631	0.197618
11713	Regions/COXKO	11793.7	13262.2	0		0.720801	0.730842	0.107273	0.786537	1.32251	0.221355	0.233691	1.33169	3.17974	0.526059	0.690404	0.183274
11714	Regions/COXKO	11873.7	13262.2	0		0.601484	0.792994	0.112639	0.0372392	1.43137	0.0288345	0.0297979	1.22201	3.86885	0.61538	0.758699	0.0118884
11715	Regions/COXKO	11953.7	13262.2	0		0.616674	0.609658	0.104154	0.77856	1.37946	0.0143166	0.0141603	1.67145	3.63557	0.331964	0.90046	0.20842
11716	Regions/COXKO	12033.7	13262.2	0		0.635224	0.873381	0.141347	0.580058	1.28091	0.402203	0.396982	1.09852	3.47326	0.590973	0.595443	0.120315
11717	Regions/COXKO	12113.7	13262.2	0		0.663051	0.700991	0.0972255	0.572316	0.933627	0.136896	0.209832	1.30598	3.66927	0.469757	0.954463	0.151206
11737	Regions/COXKO	10593.7	13182.2	0		0.61489	1.02424	0.150787	0.847058	1.16899	0.146357	0.192264	1.00796	2.97382	0.0524426	0.692887	0.196882
11738	Regions/COXKO	10673.7	13182.2	0		0.524543	0.772464	0.159605	0.645849	1.23702	0.0207809	0.0224833	1.29396	2.90585	0.599987	0.757958	0.148185
11739	Regions/COXKO	10753.7	13182.2	0		0.564493	0.918833	0.166623	0.0621459	1.66347	0.0375378	0.0464732	1.13224	2.58369	0.0699566	0.529604	0.0152812
11740	Regions/COXKO	10833.7	13182.2	0		0.592244	1.1994	0.162333	1.12293	1.36413	0.0262676	0.0354411	0.936719	2.69862	0.613514	0.362134	0.162805
11741	Regions/COXKO	10913.7	13182.2	0		0.0493858	0.727082	0.0263567	1.07476	1.05911	1.08278	1.08419	0.869114	40.8277	1.20983	0.0390818	0.0324619
11742	Regions/COXKO	10993.7	13182.2	0		0.562421	0.897224	0.211242	0.0731472	1.27955	0.0350903	0.0328828	1.07351	3.50419	0.0823406	0.681136	0.0143435
11743	Regions/COXKO	11073.7	13182.2	0		0.727825	0.90996	0.151471	0.850686	1.26353	0.171135	0.183979	1.10347	3.33454	0.545684	0.498695	0.115165
11744	Regions/COXKO	11153.7	13182.2	0		0.551594	0.668318	0.126044	0.637145	1.23434	0.158927	0.166375	1.60687	3.99539	0.459004	0.829696	0.133362
11745	Regions/COXKO	11233.7	13182.2	0		0.621863	0.747396	0.17148	0.718649	1.38332	0.231735	0.239387	1.47492	3.5358	0.467034	0.621678	0.189351
11746	Regions/COXKO	11313.7	13182.2	0		0.718865	0.665284	0.00995358	1.07476	1.20047	0.0358036	1.08419	1.31036	2.37256	1.20983	0.963914	0.0286929
11747	Regions/COXKO	11393.7	13182.2	0		0.664	1.05898	0.11717	0.0667232	1.16262	0.0382549	0.0457678	0.922579	2.69576	0.0751091	0.783328	0.0163142
11748	Regions/COXKO	11473.7	13182.2	0		0.416202	1.03915	0.0179935	1.07476	24.4543	1.08278	1.08419	1.16248	2.0212	1.20983	0.0350074	0.0290776
11749	Regions/COXKO	11553.7	13182.2	0		0.496928	0.653056	0.108013	0.567434	1.472	0.0206385	0.0186368	1.42929	4.03889	0.468433	0.91745	0.163414
11750	Regions/COXKO	11633.7	13182.2	0		0.685119	0.790464	0.115595	1.242	1.53792	0.24346	0.279313	1.1579	2.73771	0.05201	0.658555	0.227971
11751	Regions/COXKO	11713.7	13182.2	0		0.623313	0.611216	0.106351	0.685292	1.4937	0.0189538	0.0128138	1.51903	3.61148	0.724581	0.899208	0.172292
11752	Regions/COXKO	11793.7	13182.2	0		0.651828	0.757636	0.121666	1.26226	1.36676	0.212572	0.209904	1.26402	3.49875	0.659204	0.502755	0.15804
11753	Regions/COXKO	11873.7	13182.2	0		0.648907	0.706586	0.119882	0.99761	1.17143	0.248932	0.218027	1.36936	2.99382	0.734505	0.654984	0.192036
11754	Regions/COXKO	11953.7	13182.2	0		0.730522	0.790271	0.110926	0.709386	1.16344	0.195977	0.220891	1.11961	3.44208	0.441883	0.588491	0.138225
11755	Regions/COXKO	12033.7	13182.2	0		0.59498	0.816535	0.134822	0.697343	1.17116	0.204309	0.241614	1.12599	3.49163	0.377642	0.717272	0.160858
11756	Regions/COXKO	12113.7	13182.2	0		0.774985	1.20548	0.145808	0.616634	0.887072	0.305754	0.39521	0.799603	2.78282	0.451453	0.574579	0.176072
11775	Regions/COXKO	10593.7	13102.2	0		0.570954	0.956537	0.16999	0.776966	1.04794	0.43868	0.417914	0.968235	2.96063	0.0700511	0.474022	0.177371
11776	Regions/COXKO	10673.7	13102.2	0		0.491703	0.747505	0.167725	0.943026	1.42301	0.0230728	0.0187916	1.43999	3.25533	0.52027	0.803214	0.183454
11777	Regions/COXKO	10753.7	13102.2	0		0.60686	0.959086	0.172128	0.693648	1.56412	0.196992	0.192587	1.02113	2.65232	0.295512	0.42986	0.11486
11778	Regions/COXKO	10833.7	13102.2	0		0.544819	0.654705	0.120903	0.87838	1.28153	0.13452	0.12532	1.41765	2.72348	0.0330191	0.678658	0.212161
11779	Regions/COXKO	10913.7	13102.2	0		0.709221	1.53852	0.144716	1.54635	1.42742	0.250226	0.244887	0.642267	2.25033	0.0974218	0.243829	0.137257
11780	Regions/COXKO	10993.7	13102.2	0		0.58058	0.904009	0.136765	0.870619	1.38418	0.130646	0.125397	1.15397	3.43038	0.0513878	0.599599	0.151168
11781	Regions/COXKO	11073.7	13102.2	0		0.526003	0.609539	0.160126	1.01671	1.65172	0.121894	0.107165	1.81113	4.22599	0.340565	0.783589	0.192592
11782	Regions/COXKO	11153.7	13102.2	0		0.702458	0.771771	0.00698514	1.07476	2.12623	0.0286883	0.0334996	1.1033	3.20998	1.20983	0.624528	0.0149913
11783	Regions/COXKO	11233.7	13102.2	0		0.584181	0.929554	0.120503	0.924066	1.46348	0.225026	0.261363	0.977666	3.0209	0.532794	0.465238	0.148803
11784	Regions/COXKO	11313.7	13102.2	0		0.722126	0.752028	0.134455	1.40798	1.29761	0.252762	0.274071	1.4683	3.38685	0.0601987	0.706408	0.228266
11785	Regions/COXKO	11393.7	13102.2	0		0.603681	0.704069	0.138114	0.824166	1.28179	0.184647	0.218766	1.36464	2.97244	0.379308	0.973881	0.261953
11786	Regions/COXKO	11473.7	13102.2	0		0.727433	0.779994	0.187868	0.926732	0.854906	0.0260452	0.032205	1.09279	2.87667	0.528584	0.607719	0.203642
11787	Regions/COXKO	11553.7	13102.2	0		0.534947	0.608034	0.15712	1.45507	1.42721	0.0180175	0.0217806	1.61464	3.70519	1.05073	0.85336	0.240601
11788	Regions/COXKO	11633.7	13102.2	0		0.590996	0.615118	0.0805094	0.723647	1.59871	0.0128171	0.0100853	1.49511	3.3838	0.467679	0.709633	0.132219
11789	Regions/COXKO	11713.7	13102.2	0		0.599681	0.655539	0.122004	0.718903	1.48964	0.148606	0.148711	1.51649	3.44868	0.460077	0.859787	0.186402
11790	Regions/COXKO	11793.7	13102.2	0		0.643897	0.659029	0.159627	0.948716	1.26168	0.180654	0.162954	1.51263	3.72817	0.436975	0.96499	0.22001
11791	Regions/COXKO	11873.7	13102.2	0		0.624336	0.601772	0.132536	0.73991	1.19966	0.183937	0.174387	1.66547	3.22705	0.529874	0.949212	0.224577
11792	Regions/COXKO	11953.7	13102.2	0		0.531619	0.754009	0.139845	0.79589	1.30599	0.154384	0.174612	1.20371	2.8561	0.378085	0.754168	0.194931
11793	Regions/COXKO	12033.7	13102.2	0		0.628668	0.659446	0.143372	0.862722	1.27485	0.0189401	0.0222232	1.44352	3.58103	0.493616	0.985266	0.202024
11794	Regions/COXKO	12113.7	13102.2	0		0.617717	1.15283	0.116187	10.2299	1.06433	0.0291554	0.0426883	0.843374	2.98649	1.20983	0.433859	0.135393
11814	Regions/COXKO	10673.7	13022.2	0		0.622287	0.773977	0.13305	0.757353	1.28631	0.0170062	0.0212615	1.17591	3.47994	0.0427277	0.778222	0.194337
11815	Regions/COXKO	10753.7	13022.2	0		0.531673	0.572008	0.161598	0.554187	1.36934	0.185687	0.179175	1.6631	3.23019	0.451639	0.766832	0.147935
11816	Regions/COXKO	10833.7	13022.2	0		0.568035	0.761787	0.135642	0.872009	1.29754	0.201346	0.19427	1.33838	3.02946	0.424039	0.791568	0.205056
11817	Regions/COXKO	10913.7	13022.2	0		0.0408115	0.94284	0.0325967	1.07476	1.05911	1.08278	1.08419	1.15388	1.44772	1.20983	0.788314	0.654784
11818	Regions/COXKO	10993.7	13022.2	0		0.594683	0.7754	0.13158	0.839472	1.30392	0.192095	0.18728	1.30416	3.04198	0.549574	0.594804	0.175928
11819	Regions/COXKO	11073.7	13022.2	0		0.531143	0.848357	0.128244	0.719656	1.09788	0.21703	0.248463	1.2059	2.92868	0.0496027	0.525617	0.150995
11820	Regions/COXKO	11153.7	13022.2	0		0.555631	0.682149	0.108433	0.858934	1.45881	0.0222565	0.0233274	1.42571	2.68571	0.608211	0.621545	0.218807
11821	Regions/COXKO	11233.7	13022.2	0		0.637852	0.777701	0.241369	0.0596788	1.30768	0.0313235	0.0353961	1.37422	2.42026	0.0671794	0.644286	0.0138337
11822	Regions/COXKO	11313.7	13022.2	0		0.623381	0.886476	0.135274	0.811659	1.3618	0.173857	0.173886	1.17331	3.38222	0.454619	0.501288	0.107202
11823	Regions/COXKO	11393.7	13022.2	0		0.599588	0.820006	0.151857	1.45673	1.11716	0.0194978	0.0243429	1.19741	3.09949	0.0700828	0.564054	0.226194
11824	Regions/COXKO	11473.7	13022.2	0		0.645042	0.681626	0.123807	1.00352	1.27435	0.016938	0.0166723	1.50516	3.79833	0.516943	0.915967	0.258248
11825	Regions/COXKO	11553.7	13022.2	0		0.601676	0.729156	0.132743	0.829352	1.35434	0.290893	0.275206	1.19835	2.7534	0.480952	0.670625	0.186758
11826	Regions/COXKO	11633.7	13022.2	0		0.65473	1.02806	0.124223	0.692321	1.54904	0.152349	0.175324	1.01999	3.11991	0.475176	0.411324	0.10705
11827	Regions/COXKO	11713.7	13022.2	0		0.67587	0.76366	0.194795	0.805057	1.40898	0.0382235	0.0517026	1.42867	2.64342	0.672976	0.949439	0.244638
11828	Regions/COXKO	11793.7	13022.2	0		0.538729	0.637489	0.202125	0.889705	1.13409	0.0376648	0.0434983	1.27998	2.88511	0.0542345	0.571534	0.227909
11829	Regions/COXKO	11873.7	13022.2	0		0.575172	0.810232	0.138191	0.691046	1.43558	0.18229	0.190828	1.20602	2.81124	0.483356	0.654578	0.14343
11830	Regions/COXKO	11953.7	13022.2	0		0.553316	0.651284	0.121754	1.0074	1.36062	0.146351	0.145191	1.56407	3.75068	0.547336	0.77021	0.227909
11831	Regions/COXKO	12033.7	13022.2	0		0.648965	0.782799	0.149467	1.09707	1.46532	0.260579	0.302082	1.25544	3.39204	0.665617	0.64103	0.182154
11832	Regions/COXKO	12113.7	13022.2	0		0.611905	0.882597	0.0665329	0.734401	1.55331	0.224582	0.27738	1.33703	4.08233	0.574994	1.17567	0.205528
11852	Regions/COXKO	10673.7	12942.2	0		0.58706	0.873613	0.134897	1.03535	1.25707	0.0274723	0.0317446	1.20206	3.67323	0.728531	0.908221	0.215627
11853	Regions/COXKO	10753.7	12942.2	0		0.578886	0.672669	0.130598	0.543365	1.5389	0.168272	0.139681	1.58855	3.80297	0.363987	0.802669	0.129713
11854	Regions/COXKO	10833.7	12942.2	0		0.673463	1.0598	0.181589	1.17903	1.09117	0.285869	0.328886	0.988339	2.47356	0.0731991	0.361597	0.158288
11855	Regions/COXKO	10913.7	12942.2	0		19.4445	9.43332	0.321769	1.07476	1.05911	1.08278	1.08419	0.702875	23.472	1.20983	0.788314	0.654784
11856	Regions/COXKO	10993.7	12942.2	0		0.75237	1.01261	0.147511	0.796517	1.23812	0.237485	0.274101	1.00663	2.59609	0.455894	0.379775	0.0983565
11857	Regions/COXKO	11073.7	12942.2	0		0.560747	0.923224	0.170683	0.89547	1.46114	0.0271447	0.0333022	1.1261	3.0211	0.0574659	0.791513	0.241489
11858	Regions/COXKO	11153.7	12942.2	0		0.94661	1.47748	0.321769	1.07476	1.05911	1.08278	1.08419	0.702875	2.30818	1.20983	0.788314	0.654784
11859	Regions/COXKO	11233.7	12942.2	0		0.550918	0.775817	0.154877	0.500784	1.114	0.0292619	0.0350519	1.14887	2.60286	0.400954	0.792365	0.176485
11860	Regions/COXKO	11313.7	12942.2	0		0.484146	0.988992	0.239932	1.07476	20.3689	0.0422623	0.0550907	0.976774	3.02082	1.20983	0.294971	0.015352
11861	Regions/COXKO	11393.7	12942.2	0		0.614266	0.696101	0.154626	0.887882	1.14747	0.198315	0.218616	1.45953	3.00026	0.349433	0.718517	0.246707
11862	Regions/COXKO	11473.7	12942.2	0		0.693742	0.704573	0.136123	1.02953	1.19386	0.0227991	0.0320272	1.24854	3.59549	0.0654525	1.04859	0.256395
11863	Regions/COXKO	11553.7	12942.2	0		0.702626	0.948457	0.147555	0.910533	1.70639	0.297732	0.297857	0.981842	2.52402	0.689773	0.589257	0.221436
11864	Regions/COXKO	11633.7	12942.2	0		0.683517	0.919282	0.134905	1.09763	1.39108	0.206891	0.248236	1.01282	3.00414	0.569571	0.701527	0.235546
11865	Regions/COXKO	11713.7	12942.2	0		0.590518	0.863607	0.175457	0.579887	1.13383	0.0278846	0.0316402	1.07294	2.68783	0.061279	0.713926	0.136242
11866	Regions/COXKO	11793.7	12942.2	0		0.637691	0.802462	0.138632	0.896187	1.56096	0.308305	0.378279	1.0681	2.67579	0.666448	0.565552	0.181093
11867	Regions/COXKO	11873.7	12942.2	0		0.62456	0.794627	0.231037	0.509221	1.18158	0.170966	0.191557	1.41216	3.09876	0.442555	0.787222	0.152371
11868	Regions/COXKO	11953.7	12942.2	0		0.644693	0.871326	0.15237	0.925202	1.27096	0.267044	0.245647	1.15721	2.97447	0.408947	0.598572	0.188088
11869	Regions/COXKO	12033.7	12942.2	0		0.650181	0.680074	0.0829748	0.635415	1.26273	0.135825	0.151987	1.4078	4.55491	0.0551072	0.882737	0.168766
11890	Regions/COXKO	10753.7	12862.2	0		0.565731	0.987019	0.171515	1.07476	1.13384	0.0329615	0.0311769	0.983124	3.06246	1.20983	0.455623	0.0134137
11891	Regions/COXKO	10833.7	12862.2	0		0.94661	1.47748	0.321769	1.07476	1.05911	1.08278	1.08419	0.702875	21.2332	1.20983	0.788314	0.654784
11892	Regions/COXKO	10913.7	12862.2	0		0.724737	1.18621	0.178028	1.34716	1.38944	0.18788	0.194633	0.90814	3.03619	0.450812	0.37998	0.131923
11893	Regions/COXKO	10993.7	12862.2	0		0.633135	0.744015	0.173326	0.9703	1.15586	0.284308	0.306547	1.40529	3.24913	0.0438963	0.691663	0.203223
11894	Regions/COXKO	11073.7	12862.2	0		0.574506	0.872164	0.11583	0.891402	1.12779	0.189025	0.248405	1.18098	2.77632	0.0389376	0.618018	0.224826
11895	Regions/COXKO	11153.7	12862.2	0		0.426125	0.555681	0.199998	0.0567468	1.62991	0.0482985	0.0571142	1.4859	1.9913	0.0638789	0.875738	0.0281084
11896	Regions/COXKO	11233.7	12862.2	0		0.589489	0.671394	0.141241	0.668247	1.25189	0.168424	0.197434	1.43687	2.79172	0.372103	0.913047	0.188415
11897	Regions/COXKO	11313.7	12862.2	0		0.643805	0.718277	0.119633	0.854854	1.32994	0.146453	0.136359	1.42816	3.20474	0.290417	0.572148	0.150697
11898	Regions/COXKO	11393.7	12862.2	0		0.605163	0.635164	0.129548	0.819674	1.40635	0.0180512	0.0146273	1.53766	3.92869	0.547148	0.740242	0.189997
11899	Regions/COXKO	11473.7	12862.2	0		0.561658	0.737503	0.132678	0.645237	1.55784	0.245944	0.24236	1.40085	2.82123	0.379297	0.76675	0.18881
11900	Regions/COXKO	11553.7	12862.2	0		0.557869	0.665984	0.162544	0.782779	1.51706	0.0236776	0.0325705	1.40275	3.41543	0.0480686	0.651115	0.191147
11901	Regions/COXKO	11633.7	12862.2	0		0.560238	0.69993	0.134418	0.679141	1.11598	0.188001	0.243244	1.13052	2.67292	0.4988	0.938464	0.197665
11902	Regions/COXKO	11713.7	12862.2	0		0.601983	0.738848	0.178501	0.603012	1.11076	0.0225376	0.0273131	1.24123	2.91022	0.377005	0.658285	0.171666
11903	Regions/COXKO	11793.7	12862.2	0		0.606524	0.752101	0.184637	0.789102	1.06204	0.251041	0.252687	1.32333	2.69946	0.574061	0.717938	0.194396
11904	Regions/COXKO	11873.7	12862.2	0		0.646423	0.933036	0.151852	0.966933	1.1722	0.280805	0.33245	1.01899	2.23583	0.588273	0.48048	0.163931
11905	Regions/COXKO	11953.7	12862.2	0		0.617442	0.798261	0.147286	0.763615	1.1397	0.144739	0.157592	1.24439	3.10475	0.474319	0.678542	0.183185
11906	Regions/COXKO	12033.7	12862.2	0		0.654717	0.925685	0.147637	0.664749	1.31429	0.244388	0.358546	1.15312	2.7585	0.476426	0.919361	0.212226
11928	Regions/COXKO	10753.7	12782.2	0		0.94661	1.47748	0.321769	1.07476	0.0379919	1.08278	1.08419	0.702875	2.30818	1.20983	0.788314	0.654784
11929	Regions/COXKO	10833.7	12782.2	0		0.94661	1.47748	0.321769	1.07476	1.05911	1.08278	1.08419	0.702875	2.30818	1.20983	0.788314	0.654784
11930	Regions/COXKO	10913.7	12782.2	0		0.602944	0.991896	0.169261	0.0548411	1.23798	0.0372405	0.0351896	1.04092	3.18721	0.0617337	0.577955	0.0132593
11931	Regions/COXKO	10993.7	12782.2	0		0.666284	0.847695	0.106075	1.01121	1.15915	0.0379055	0.0405459	1.22479	2.9471	0.0630452	0.637512	0.309269
11932	Regions/COXKO	11073.7	12782.2	0		0.652026	0.925201	0.156103	1.07476	0.903638	0.0593015	0.0755099	0.960503	3.36644	1.20983	0.356573	0.0192031
11933	Regions/COXKO	11153.7	12782.2	0		0.94661	1.47748	0.321769	1.07476	1.05911	1.08278	1.08419	0.702875	2.30818	1.20983	0.788314	0.654784
11934	Regions/COXKO	11233.7	12782.2	0		0.383442	0.59826	0.0171692	1.07476	0.0384159	1.08278	1.08419	1.68063	2.22088	1.20983	0.0231851	0.0192579
11935	Regions/COXKO	11313.7	12782.2	0		0.562256	0.696815	0.127468	0.826903	1.19414	0.0174696	0.0158616	1.52244	3.25038	0.039612	0.689201	0.181329
11936	Regions/COXKO	11393.7	12782.2	0		0.584387	0.603128	0.128621	0.562623	1.39372	0.0160186	0.0150364	1.784	3.86714	0.476415	0.840457	0.125387
11937	Regions/COXKO	11473.7	12782.2	0		0.529879	0.728043	0.12187	1.05919	1.44078	0.164069	0.135414	1.3716	3.45705	0.0424802	0.628891	0.226804
11938	Regions/COXKO	11553.7	12782.2	0		0.60013	0.782122	0.150821	0.643368	1.4116	0.220207	0.245522	1.311	3.49351	0.0393725	0.738674	0.177538
11939	Regions/COXKO	11633.7	12782.2	0		0.562182	0.779182	0.179586	0.0660406	0.882881	0.036973	0.0381637	1.17054	3.18352	0.0743408	0.86387	0.0136628
11940	Regions/COXKO	11713.7	12782.2	0		0.568982	0.779916	0.174059	0.600164	1.31173	0.0203147	0.0213514	1.21408	2.7101	0.386942	0.75175	0.184191
11941	Regions/COXKO	11793.7	12782.2	0		0.53917	0.727632	0.150392	0.763268	1.44756	0.0168364	0.0160357	1.31358	2.77458	0.566644	0.726506	0.180512
11942	Regions/COXKO	11873.7	12782.2	0		0.54365	0.562386	0.150546	1.00189	1.66038	0.185407	0.189285	1.59726	3.80745	0.530566	0.78355	0.212746
11943	Regions/COXKO	11953.7	12782.2	0		0.71058	0.983224	0.100179	0.732117	1.2458	0.184928	0.288753	0.865805	2.64456	0.446221	0.473299	0.11087
11967	Regions/COXKO	10833.7	12702.2	0		0.647206	1.05493	0.181511	0.0620408	1.05461	0.0546789	0.0782747	1.07955	3.43656	0.0698383	0.617214	0.0220815
11968	Regions/COXKO	10913.7	12702.2	0		0.59509	0.93686	0.134068	0.870721	0.927041	0.0211266	0.0376914	0.957792	3.50162	0.588843	0.582371	0.251412
11969	Regions/COXKO	10993.7	12702.2	0		0.717523	0.913882	0.167327	0.811867	1.28102	0.315558	0.290374	1.19241	3.31857	0.0593284	0.448722	0.12631
11970	Regions/COXKO	11073.7	12702.2	0		0.617551	0.983201	0.141089	1.25054	1.41891	0.160779	0.185496	1.04194	3.00037	0.078542	0.427313	0.130703
11971	Regions/COXKO	11153.7	12702.2	0		0.94661	1.47748	0.321769	1.07476	1.05911	1.08278	1.08419	0.702875	2.30818	1.20983	0.788314	0.654784
11972	Regions/COXKO	11233.7	12702.2	0		0.551901	0.700533	0.157676	0.881884	1.29113	0.0173097	0.0168967	1.50797	2.6281	0.357144	0.645595	0.192073
11973	Regions/COXKO	11313.7	12702.2	0		0.585293	0.741924	0.125964	1.21389	1.3806	0.164986	0.165144	1.26779	3.32986	0.420935	0.656181	0.195116
11974	Regions/COXKO	11393.7	12702.2	0		0.527088	0.818078	0.159705	0.624899	1.41243	0.0173312	0.0177294	1.26927	3.32602	0.39955	0.543261	0.130766
11975	Regions/COXKO	11473.7	12702.2	0		0.506609	0.706912	0.123357	1.02886	1.46411	0.205971	0.183358	1.37212	3.17875	0.46631	0.885501	0.217094
11976	Regions/COXKO	11553.7	12702.2	0		0.53048	0.658039	0.142985	0.637208	1.51439	0.0189433	0.0240944	1.60389	3.24402	0.39272	0.877521	0.205935
11977	Regions/COXKO	11633.7	12702.2	0		0.57796	0.87513	0.123089	0.879297	1.33174	0.169592	0.153194	1.11404	3.08977	0.598956	0.659578	0.21951
11978	Regions/COXKO	11713.7	12702.2	0		0.566625	0.93271	0.133066	0.707823	1.6731	0.322027	0.332539	1.00874	2.69637	0.0581897	0.379169	0.11328
11979	Regions/COXKO	11793.7	12702.2	0		0.470972	0.560562	0.113195	0.649937	1.5355	0.246851	0.21992	1.65616	3.98718	0.583134	0.814855	0.185047
11980	Regions/COXKO	11873.7	12702.2	0		0.59784	0.675766	0.132652	0.85421	1.33403	0.018861	0.0159473	1.36514	3.21548	0.507682	0.70935	0.24822
12005	Regions/COXKO	10913.7	12622.2	0		0.585026	0.695887	0.112791	0.643614	1.33279	0.107309	0.112195	1.57419	3.33256	0.341448	0.787875	0.161599
12006	Regions/COXKO	10993.7	12622.2	0		0.603937	0.658321	0.128074	1.10826	1.12694	0.0211769	0.0240355	1.59065	3.95777	0.0672963	0.785128	0.177333
12007	Regions/COXKO	11073.7	12622.2	0		0.94661	0.14237	0.321769	1.07476	1.05911	1.08278	1.08419	7.29426	2.30818	1.20983	0.788314	0.654784
12008	Regions/COXKO	11153.7	12622.2	0		0.0284878	0.898615	0.022375	1.07476	1.05911	1.08278	1.08419	0.612086	2.03421	1.20983	15.5426	0.654784
12009	Regions/COXKO	11233.7	12622.2	0		0.494558	0.658888	0.116666	0.629872	1.50648	0.0168314	0.0164346	1.52802	3.27633	0.400479	0.656811	0.157591
12010	Regions/COXKO	11313.7	12622.2	0		0.525448	0.611149	0.146064	0.798788	1.47019	0.164269	0.151554	1.69659	3.63841	0.343953	0.806444	0.182951
12011	Regions/COXKO	11393.7	12622.2	0		0.671466	0.863254	0.156338	0.864163	1.42444	0.0176354	0.0212405	1.05804	3.03217	0.524712	0.422364	0.138526
12012	Regions/COXKO	11473.7	12622.2	0		0.491269	0.651607	0.146583	1.07561	1.54918	0.0180902	0.0159184	1.61055	3.92434	0.62575	0.749267	0.214124
12013	Regions/COXKO	11553.7	12622.2	0		0.587992	0.743264	0.14548	0.783073	1.34384	0.218673	0.250114	1.28955	3.0426	0.61827	0.845312	0.22661
12014	Regions/COXKO	11633.7	12622.2	0		0.643332	0.834693	0.150867	0.849204	1.29055	0.278234	0.260457	1.33744	3.5031	0.0523578	0.630457	0.168763
12015	Regions/COXKO	11713.7	12622.2	0		0.63305	0.87526	0.166578	0.694476	1.16982	0.180745	0.212172	1.09221	3.50209	0.062417	0.759778	0.150339
12016	Regions/COXKO	11793.7	12622.2	0		0.631431	0.676611	0.168948	0.778259	1.66486	0.207659	0.200428	1.65759	3.69967	0.377846	0.940247	0.198871
12042	Regions/COXKO	10913.7	12542.2	0		0.62071	0.868652	0.152673	0.942378	1.36068	0.166773	0.192433	1.22988	3.43705	0.0619907	0.730005	0.185501
12043	Regions/COXKO	10993.7	12542.2	0		0.717371	0.854289	0.14865	1.11331	1.25717	0.24239	0.282994	1.41485	3.07076	0.0704157	0.593396	0.162647
12044	Regions/COXKO	11073.7	12542.2	0		0.94661	1.47748	0.321769	1.07476	1.05911	1.08278	1.08419	0.702875	1.03998	1.20983	0.788314	0.654784
12045	Regions/COXKO	11153.7	12542.2	0		0.546819	0.805309	0.142374	0.605836	1.35361	0.265331	0.267254	1.15083	3.26668	0.838125	0.507928	0.0882357
12046	Regions/COXKO	11233.7	12542.2	0		0.542878	0.623062	0.127587	0.951489	1.50309	0.12142	0.113148	1.62018	3.72205	0.433197	0.826376	0.208914
12047	Regions/COXKO	11313.7	12542.2	0		0.520412	0.590851	0.0946067	0.784939	1.57525	0.179128	0.138925	1.64079	3.478	0.529488	0.825836	0.198081
12048	Regions/COXKO	11393.7	12542.2	0		0.567635	0.632779	0.158916	1.17602	1.57049	0.0176815	0.0197292	1.67321	3.3264	0.667004	0.730635	0.263911
12049	Regions/COXKO	11473.7	12542.2	0		0.584098	0.711258	0.150067	0.92007	1.34475	0.0159721	0.0155519	1.30843	3.78966	0.391787	0.590092	0.149744
12050	Regions/COXKO	11553.7	12542.2	0		0.720879	1.36791	0.179218	0.0491892	1.58206	0.266471	0.333758	0.822569	2.74103	0.0553714	0.613026	0.0122988
12051	Regions/COXKO	11633.7	12542.2	0		0.537096	0.636419	0.103692	0.756973	1.50774	0.0181625	0.013501	1.805	4.31205	0.410065	1.09925	0.243178
12052	Regions/COXKO	11713.7	12542.2	0		0.567629	0.876418	0.147664	1.03967	1.1443	0.0220141	0.0221579	1.24162	3.08565	0.484616	0.684804	0.22263
12053	Regions/COXKO	11793.7	12542.2	0		0.736586	0.978093	0.157227	0.519199	1.24263	0.178733	0.168053	1.04697	3.41252	0.648787	0.548494	0.0885332
12080	Regions/COXKO	10993.7	12462.2	0		0.60693	0.999961	0.188932	0.0708784	1.16804	0.0265776	0.0425705	1.12015	2.97724	0.0797865	0.63068	0.0151626
12081	Regions/COXKO	11073.7	12462.2	0		0.604237	0.743503	0.206552	0.760187	1.72992	0.336315	0.356863	1.27898	3.30248	0.0514207	0.700582	0.182496
12082	Regions/COXKO	11153.7	12462.2	0		0.583001	0.763902	0.134288	0.883467	1.15513	0.149245	0.135837	1.43784	4.03511	0.384223	0.958144	0.285307
12083	Regions/COXKO	11233.7	12462.2	0		0.583372	0.64621	0.115778	0.823114	1.23364	0.0390716	0.0306489	1.54502	2.922	0.0482869	0.81917	0.247824
12084	Regions/COXKO	11313.7	12462.2	0		0.464577	0.592212	0.142943	0.534774	1.52989	0.289245	0.203094	1.55013	3.2385	0.0419561	0.76705	0.147115
12085	Regions/COXKO	11393.7	12462.2	0		0.499646	0.734853	0.115173	0.601614	1.062	0.0227441	0.0222624	1.37868	2.82882	0.04581	0.740886	0.156012
12086	Regions/COXKO	11473.7	12462.2	0		0.591213	0.926757	0.201777	0.982468	1.49514	0.0203052	0.0230021	1.35041	4.2166	0.626357	0.661977	0.16474
12087	Regions/COXKO	11553.7	12462.2	0		0.94661	1.18336	0.0402036	1.07476	1.05911	1.08278	1.08419	1.10573	27.6421	1.20983	0.788314	0.654784
12088	Regions/COXKO	11633.7	12462.2	0		0.694099	1.1837	0.173289	1.64402	1.57899	0.234575	0.344315	0.961129	2.65712	0.747065	0.61077	0.23165
12089	Regions/COXKO	11713.7	12462.2	0		0.94661	1.47748	0.321769	1.07476	1.05911	1.08278	1.08419	0.702875	2.30818	1.20983	0.788314	0.654784
12116	Regions/COXKO	11073.7	12382.2	0		0.94661	11.4365	0.321769	1.07476	1.05911	1.08278	1.08419	0.702875	2.30818	1.20983	0.788314	0.654784
12117	Regions/COXKO	11153.7	12382.2	0		0.94661	1.47748	0.321769	1.07476	1.05911	1.08278	1.08419	0.702875	2.30818	1.20983	0.788314	0.654784
12118	Regions/COXKO	11233.7	12382.2	0		0.94661	1.47748	0.321769	1.07476	1.05911	1.08278	1.08419	0.702875	2.30818	1.20983	0.788314	0.654784
12119	Regions/COXKO	11313.7	12382.2	0		0.575	0.824034	0.149149	1.007	1.02594	0.252723	0.326436	1.31455	2.95124	0.566825	1.25594	0.288908
12120	Regions/COXKO	11393.7	12382.2	0		0.627194	0.830962	0.156423	0.684676	1.09166	0.184243	0.199338	1.37517	3.18651	0.42099	0.986317	0.225716
12121	Regions/COXKO	11473.7	12382.2	0		0.56219	0.907757	0.109072	0.676286	1.18967	0.0248292	0.0285183	1.25215	3.66605	0.0472147	0.728578	0.187391
12122	Regions/COXKO	11553.7	12382.2	0		0.833819	1.41077	0.134892	1.24914	1.10463	0.204512	0.238422	0.734565	3.03181	0.177036	0.390563	0.117036
12123	Regions/COXKO	11633.7	12382.2	0		0.0366854	0.476664	0.031104	1.07476	1.05911	1.08278	1.08419	1.33717	1.35088	1.20983	0.788314	0.654784
15209	Regions/COXKO	13433.7	8662.16	0		0.94661	9.0928	0.321769	1.07476	1.05911	1.08278	1.08419	0.702875	2.30818	1.20983	0.788314	0.654784
15254	Regions/COXKO	13193.7	8582.16	0		0.676968	0.757767	0.0961531	0.68601	1.48247	0.175034	0.262503	1.43253	3.82659	0.417095	0.772174	0.148081
15255	Regions/COXKO	13273.7	8582.16	0		0.650882	0.625955	0.0796883	0.984834	1.39733	0.168421	0.191923	1.49348	3.5219	0.644005	0.843745	0.197244
15256	Regions/COXKO	13353.7	8582.16	0		0.611556	0.710199	0.0953155	1.16398	1.41628	0.0235989	0.0270346	1.48187	2.89655	0.676428	0.746823	0.226164
15257	Regions/COXKO	13433.7	8582.16	0		0.741503	0.759722	0.127427	1.36525	1.42189	0.20796	0.271846	1.23767	3.0042	0.840588	0.556195	0.172176
15258	Regions/COXKO	13513.7	8582.16	0		0.730955	1.1989	0.0120672	17.8597	19.408	0.050105	0.0669178	1.07641	2.93375	1.20983	0.641301	0.45058
15309	Regions/COXKO	13113.7	8502.16	0		0.617191	0.721546	0.102967	0.820855	1.763	0.171248	0.190888	1.48741	3.47456	0.439344	0.971073	0.213623
15310	Regions/COXKO	13193.7	8502.16	0		0.654758	0.784969	0.0925107	0.861795	1.56382	0.281287	0.304208	1.29531	2.83342	0.339295	0.715292	0.211739
15311	Regions/COXKO	13273.7	8502.16	0		0.623225	0.693219	0.0884398	0.705322	1.23269	0.191536	0.231072	1.31021	2.9832	0.412253	0.973761	0.237269
15312	Regions/COXKO	13353.7	8502.16	0		0.738701	0.815321	0.100605	1.00786	1.47961	0.209616	0.214076	1.26147	3.32825	0.487678	0.71716	0.197633
15313	Regions/COXKO	13433.7	8502.16	0		0.718336	0.849707	0.115182	1.12951	1.5224	0.0208706	0.0212177	1.34096	3.00856	0.623272	0.775616	0.229998
15314	Regions/COXKO	13513.7	8502.16	0		0.645096	0.722356	0.0962386	1.06209	1.4656	0.22108	0.22866	1.25433	3.18109	0.549393	0.742283	0.199777
15315	Regions/COXKO	13593.7	8502.16	0		0.763817	1.0446	0.116367	1.22053	1.3553	0.1592	0.173262	1.03678	3.45122	0.0768533	0.467208	0.156601
15316	Regions/COXKO	13673.7	8502.16	0		0.94661	0.154093	0.321769	1.07476	1.05911	1.08278	1.08419	6.73934	2.30818	1.20983	0.788314	0.654784
15368	Regions/COXKO	13113.7	8422.16	0		0.740352	0.674608	0.0936141	1.27077	1.44992	0.240148	0.234025	1.68165	3.57077	0.607115	0.710995	0.200213
15369	Regions/COXKO	13193.7	8422.16	0		0.628134	0.705334	0.100896	0.924536	1.18886	0.225834	0.236264	1.37073	3.01248	0.477767	0.793361	0.205759
15370	Regions/COXKO	13273.7	8422.16	0		0.70154	0.794835	0.122567	0.976965	1.49558	0.0279675	0.0402785	1.16807	2.49343	0.0495529	0.683926	0.262124
15371	Regions/COXKO	13353.7	8422.16	0		0.635528	0.680064	0.0738114	0.667502	1.43337	0.212545	0.242074	1.43679	2.84719	0.425315	1.01008	0.21151
15372	Regions/COXKO	13433.7	8422.16	0		0.657473	0.675548	0.0839978	1.16658	1.59138	0.190081	0.173552	1.67215	3.55851	0.678065	0.96322	0.258747
15373	Regions/COXKO	13513.7	8422.16	0		0.575905	0.615743	0.11176	1.22182	1.53196	0.232494	0.175387	1.76849	3.65451	0.696589	0.807171	0.24601
15374	Regions/COXKO	13593.7	8422.16	0		0.649027	0.68455	0.0814105	0.90262	1.70644	0.186666	0.168242	1.55121	3.39595	0.630249	0.792247	0.228794
15375	Regions/COXKO	13673.7	8422.16	0		0.744077	0.862168	0.109067	0.821455	1.30612	0.217941	0.261147	1.47345	3.83126	0.390844	0.800914	0.185035
15387	Regions/COXKO	14633.7	8422.16	0		0.512861	0.899435	0.0566492	0.563212	1.09777	0.00829578	0.0220794	0.941908	2.15289	0.383955	0.842628	0.105046
15388	Regions/COXKO	14713.7	8422.16	0		0.461671	0.968904	0.037085	0.380412	0.806334	0.162322	0.456999	0.715658	1.9091	0.349746	0.735472	0.085881
15389	Regions/COXKO	14793.7	8422.16	0		0.517012	0.966674	0.0734918	0.6739	0.820852	0.233816	0.572229	0.849821	2.48727	0.392313	0.85642	0.171642
15390	Regions/COXKO	14873.7	8422.16	0		0.701951	0.823058	0.0848314	0.993681	1.54752	0.218425	0.357378	1.27143	2.5971	0.350717	0.710265	0.240115
15391	Regions/COXKO	14953.7	8422.16	0		0.692886	0.793935	0.114704	0.923114	1.3451	0.190677	0.169334	1.28958	3.72045	0.510555	0.748097	0.211381
15392	Regions/COXKO	15033.7	8422.16	0		0.94661	1.47748	0.321769	1.07476	1.05911	1.08278	1.08419	0.702875	2.30818	1.20983	0.788314	0.654784
15393	Regions/COXKO	15113.7	8422.16	0		0.94661	1.47748	0.321769	1.07476	1.05911	1.08278	1.08419	0.702875	2.30818	1.20983	0.788314	0.654784
15394	Regions/COXKO	15193.7	8422.16	0		0.74498	1.02215	0.0985867	1.01189	1.07795	0.034291	0.0484265	1.12077	3.00596	0.0922167	0.681115	0.194742
15425	Regions/COXKO	12953.7	8342.16	0		0.708941	0.827986	0.10261	1.07584	1.42147	0.286689	0.2922	1.28712	3.57118	0.45642	0.558021	0.185207
15426	Regions/COXKO	13033.7	8342.16	0		0.711958	0.79505	0.0984199	1.28983	1.52998	0.253456	0.246119	1.22296	3.35494	0.453453	0.592844	0.200676
15427	Regions/COXKO	13113.7	8342.16	0		0.650726	0.751625	0.0866672	1.00849	1.33078	0.261331	0.20403	1.43919	3.78751	0.496172	0.884593	0.274924
15428	Regions/COXKO	13193.7	8342.16	0		0.65459	0.799904	0.0990675	0.880281	1.3149	0.205763	0.282166	1.20805	3.31632	0.42075	0.819426	0.187703
15429	Regions/COXKO	13273.7	8342.16	0		0.853897	0.88112	0.138894	18.2135	1.59649	0.0313631	0.0457088	1.22239	2.0933	1.20983	0.666662	0.229981
15430	Regions/COXKO	13353.7	8342.16	0		0.644492	0.697702	0.15487	0.896424	1.5712	0.368582	0.363863	1.26782	2.60305	0.0428589	0.683194	0.243241
15431	Regions/COXKO	13433.7	8342.16	0		0.742145	0.944341	0.10999	0.813656	1.16343	0.200114	0.400887	1.00561	2.77574	0.338897	0.750229	0.192316
15432	Regions/COXKO	13513.7	8342.16	0		0.711923	0.744587	0.110897	0.904271	1.28064	0.207107	0.203824	1.38546	3.10092	0.699384	0.700443	0.149388
15433	Regions/COXKO	13593.7	8342.16	0		0.618727	0.772124	0.104069	0.96549	1.50872	0.230997	0.228491	1.30859	2.81685	0.604589	0.8106	0.218301
15434	Regions/COXKO	13673.7	8342.16	0		0.696164	0.738873	0.0929496	0.628223	1.48487	0.213682	0.220007	1.38851	2.89554	0.468094	0.811279	0.150857
15444	Regions/COXKO	14473.7	8342.16	0		0.806991	1.0265	0.0120697	1.07476	0.0456558	1.08278	0.0455357	0.75545	1.62026	1.20983	0.795288	0.0236101
15445	Regions/COXKO	14553.7	8342.16	0		0.71162	1.26327	0.103964	1.62783	1.57087	0.0220924	0.0270847	0.781952	2.23551	0.0745971	0.3292	0.175498
15446	Regions/COXKO	14633.7	8342.16	0		0.59855	0.84302	0.0794554	0.831508	1.37497	0.304289	0.461507	1.05452	2.26819	0.410506	0.727321	0.175628
15447	Regions/COXKO	14713.7	8342.16	0		0.480246	1.21605	0.0780158	0.702338	0.990068	0.179147	0.526943	0.682892	1.69254	0.484565	0.664875	0.170343
15448	Regions/COXKO	14793.7	8342.16	0		0.516463	0.869349	0.086492	0.865297	1.04486	0.208577	0.479724	0.900688	2.07617	0.437185	0.770817	0.190716
15449	Regions/COXKO	14873.7	8342.16	0		0.722577	0.94516	0.106458	0.726731	1.43134	0.0245218	0.025729	1.13758	2.90272	0.386552	0.681762	0.213608
15450	Regions/COXKO	14953.7	8342.16	0		0.666267	0.76446	0.0976963	1.09014	1.31224	0.219091	0.273832	1.3688	3.0756	0.619561	0.804392	0.233202
15451	Regions/COXKO	15033.7	8342.16	0		1.04025	1.37901	0.190029	13.8375	0.875242	0.0499815	1.08419	0.927123	2.78259	1.20983	0.738017	0.321217
15452	Regions/COXKO	15113.7	8342.16	0		0.769107	1.19666	0.149762	0.744332	1.38845	0.269724	0.323081	1.13242	3.6888	0.585864	0.639081	0.155504
15453	Regions/COXKO	15193.7	8342.16	0		0.622701	0.849665	0.102611	0.938866	1.59246	0.0186332	0.0219234	1.34884	3.46213	0.374215	0.930581	0.327594
15454	Regions/COXKO	15273.7	8342.16	0		0.600819	0.764784	0.119928	0.700593	1.49819	0.17927	0.21647	1.58758	3.68006	0.648798	1.04513	0.211897
15455	Regions/COXKO	15353.7	8342.16	0		0.678113	1.21322	0.100658	0.97194	1.17367	0.0313557	0.0479303	1.06425	3.27317	0.0586602	1.06752	0.331008
15483	Regions/COXKO	12873.7	8262.16	0		0.742512	0.882649	0.113802	0.681123	1.48745	0.264289	0.291504	1.32445	3.05329	0.469649	0.565145	0.12129
15484	Regions/COXKO	12953.7	8262.16	0		0.621368	0.631084	0.0836676	0.892015	1.4001	0.149442	0.124267	1.63956	3.939	0.628054	0.981566	0.221682
15485	Regions/COXKO	13033.7	8262.16	0		0.558558	0.624868	0.121231	0.723949	1.50684	0.249557	0.223714	1.55558	2.87744	0.677157	0.864643	0.205296
15486	Regions/COXKO	13113.7	8262.16	0		0.78519	0.825865	0.133578	1.26934	1.71902	0.292814	0.340418	1.25384	3.22979	0.0543331	0.622503	0.290625
15487	Regions/COXKO	13193.7	8262.16	0		0.598745	0.618805	0.084105	0.804429	1.51146	0.121562	0.112314	1.73595	3.76331	0.626442	0.962247	0.1896
15488	Regions/COXKO	13273.7	8262.16	0		0.778329	0.669136	0.310125	1.07476	1.05911	1.08278	1.08419	1.42941	2.19296	1.20983	0.869529	0.033686
15489	Regions/COXKO	13353.7	8262.16	0		0.773774	0.967052	0.157358	1.06411	1.4413	0.270749	0.348711	1.02604	2.33486	0.0567884	0.590878	0.231345
15490	Regions/COXKO	13433.7	8262.16	0		0.722985	0.732309	0.0841306	0.568541	1.21527	0.500249	0.582696	1.07096	2.46026	0.040551	0.894228	0.184872
15491	Regions/COXKO	13513.7	8262.16	0		0.702717	1.01368	0.0886948	0.052609	1.05923	0.0317068	0.036781	0.775112	2.24662	0.059221	0.54673	0.0102402
15492	Regions/COXKO	13593.7	8262.16	0		0.766588	0.829116	0.128217	0.954713	1.49425	0.215474	0.235629	1.17804	2.17757	0.493039	0.506381	0.174427
15493	Regions/COXKO	13673.7	8262.16	0		0.633366	0.736344	0.110823	0.706106	1.52407	0.163228	0.17159	1.36157	3.05961	0.469478	0.826846	0.202895
15499	Regions/COXKO	14153.7	8262.16	0		0.671322	0.724957	0.0702861	0.891163	1.52643	0.250415	0.232342	1.34759	3.00213	0.577256	0.778118	0.196022
15500	Regions/COXKO	14233.7	8262.16	0		0.652708	0.799591	0.0827982	0.606289	1.47282	0.149001	0.136096	1.3929	3.3736	0.470324	0.7915	0.158529
15501	Regions/COXKO	14313.7	8262.16	0		0.590885	0.78328	0.00733538	1.07476	1.16088	0.0393476	0.0430997	1.47595	2.63166	1.20983	0.773812	0.017526
15502	Regions/COXKO	14393.7	8262.16	0		0.632878	0.695016	0.0940368	0.975679	1.27667	0.018284	0.0174987	1.37417	2.43757	0.671448	0.764362	0.189297
15503	Regions/COXKO	14473.7	8262.16	0		0.536296	0.673931	0.107117	1.06898	1.5982	0.23856	0.21845	1.54423	2.5237	0.532583	0.778673	0.20602
15504	Regions/COXKO	14553.7	8262.16	0		0.696695	0.724215	0.00885878	1.07476	1.65592	0.051608	0.0482345	1.35406	2.74713	1.20983	0.695834	0.0183139
15505	Regions/COXKO	14633.7	8262.16	0		0.684346	0.662833	0.0837029	0.87895	1.35286	0.0205363	0.0262335	1.48212	2.69976	0.038544	0.794443	0.253823
15506	Regions/COXKO	14713.7	8262.16	0		0.603703	0.866044	0.0908508	0.910115	1.3716	0.207832	0.259444	1.05327	2.58953	0.634431	0.822926	0.295627
15507	Regions/COXKO	14793.7	8262.16	0		0.640797	0.808813	0.0905116	0.81061	1.27688	0.209946	0.234864	1.18992	2.60208	0.466512	0.84338	0.220025
15508	Regions/COXKO	14873.7	8262.16	0		0.61677	0.775444	0.102485	0.987704	1.34012	0.413903	0.560103	1.26129	2.62196	0.046505	0.873012	0.222578
15509	Regions/COXKO	14953.7	8262.16	0		0.675092	0.780689	0.133139	1.1463	1.14923	0.027597	0.0262921	1.31417	2.68165	0.0716951	0.931805	0.271132
15510	Regions/COXKO	15033.7	8262.16	0		0.762034	1.15803	0.19649	18.5626	0.910769	0.0428327	0.055092	1.26311	3.24809	11.9324	0.427942	0.261444
15511	Regions/COXKO	15113.7	8262.16	0		0.585024	0.739019	0.133379	1.18857	1.39569	0.02716	0.0251948	1.60754	2.99136	0.90564	0.951498	0.321483
15512	Regions/COXKO	15193.7	8262.16	0		0.623649	0.984301	0.110872	0.0549135	1.14834	0.0351084	0.0380647	1.18142	3.28858	0.0618152	0.883428	0.019822
15513	Regions/COXKO	15273.7	8262.16	0		0.449738	0.967021	0.081806	1.07476	1.44979	0.0439654	0.0521686	1.03938	2.47139	1.20983	1.05881	0.0237286
15542	Regions/COXKO	12793.7	8182.16	0		0.703608	1.02362	0.127083	0.779577	1.30002	0.313886	0.566097	0.944451	2.80511	0.492083	0.626228	0.17401
15543	Regions/COXKO	12873.7	8182.16	0		0.648411	0.768513	0.114635	0.922799	1.18384	0.194842	0.234751	1.2978	3.12749	0.0418954	0.716063	0.195893
15544	Regions/COXKO	12953.7	8182.16	0		0.664386	0.714317	0.101082	0.590451	1.39522	0.224364	0.232453	1.36304	2.9937	0.492293	0.773958	0.153131
15545	Regions/COXKO	13033.7	8182.16	0		0.655861	0.730723	0.128076	0.843647	1.41416	0.196985	0.189704	1.41292	2.66025	0.437339	0.800482	0.23797
15546	Regions/COXKO	13113.7	8182.16	0		0.717034	0.635824	0.0975537	0.981242	1.42294	0.21426	0.236214	1.43033	3.20762	0.0403396	0.760802	0.245763
15547	Regions/COXKO	13193.7	8182.16	0		0.690238	0.749672	0.0983771	0.934067	1.53114	0.160248	0.144631	1.40592	3.59859	0.54583	0.799774	0.230636
15548	Regions/COXKO	13273.7	8182.16	0		0.764579	0.735218	0.139375	0.987424	1.3407	0.198714	0.304477	1.54613	3.77544	0.587804	0.751827	0.228618
15549	Regions/COXKO	13353.7	8182.16	0		0.806544	0.930787	0.0973609	0.860991	1.52413	0.0211767	0.0279223	1.136	3.14578	0.0428326	0.558422	0.192805
15550	Regions/COXKO	13433.7	8182.16	0		0.62294	0.85036	0.095294	0.943111	1.17004	0.28687	0.587381	0.914283	2.19947	0.618318	0.867676	0.306234
15551	Regions/COXKO	13513.7	8182.16	0		0.802455	0.68498	0.0319191	1.07476	1.05911	1.08278	1.08419	1.16092	22.3772	1.20983	0.788314	0.654784
15552	Regions/COXKO	13593.7	8182.16	0		0.773214	0.781099	0.118053	0.941303	1.43776	0.198264	0.267988	1.32315	2.60957	0.46677	0.683163	0.207948
15553	Regions/COXKO	13673.7	8182.16	0		0.684586	0.698477	0.101157	0.691159	1.56033	0.252112	0.231051	1.5573	2.75944	0.487659	0.752691	0.153901
15554	Regions/COXKO	13753.7	8182.16	0		0.709577	1.4262	0.186448	15.6893	0.0478258	0.0447771	0.0660136	0.75906	1.88598	1.20983	0.455277	0.256363
15555	Regions/COXKO	13833.7	8182.16	0		0.94661	0.147896	0.321769	1.07476	1.05911	1.08278	1.08419	7.02173	2.30818	1.20983	0.788314	0.654784
15556	Regions/COXKO	13913.7	8182.16	0		0.94661	1.47748	0.321769	1.07476	1.05911	1.08278	1.08419	0.702875	0.105516	1.20983	0.788314	0.654784
15557	Regions/COXKO	13993.7	8182.16	0		0.724615	0.808943	0.0106132	1.07476	1.39508	0.0571026	0.0612675	1.44741	2.7131	1.20983	0.720946	0.0197502
15558	Regions/COXKO	14073.7	8182.16	0		0.596932	0.861535	0.13209	0.855784	1.27606	0.026274	0.0301683	1.364	2.67257	0.0484718	0.531762	0.178485
15559	Regions/COXKO	14153.7	8182.16	0		0.697152	0.714928	0.0955754	0.718474	1.38643	0.229608	0.189916	1.52813	3.18104	0.442904	0.858335	0.229189
15560	Regions/COXKO	14233.7	8182.16	0		0.669735	0.762193	0.0938265	0.858421	1.43491	0.0179008	0.0170653	1.32358	3.12091	0.450284	0.681754	0.170441
15561	Regions/COXKO	14313.7	8182.16	0		0.596281	0.876271	0.0712258	0.90995	1.53915	0.0227208	0.0251046	1.45702	3.54031	0.941072	0.698564	0.186673
15562	Regions/COXKO	14393.7	8182.16	0		0.583463	0.738695	0.0958413	0.468424	1.26765	0.020124	0.0151178	1.59964	3.44606	0.377844	0.756313	0.15102
15563	Regions/COXKO	14473.7	8182.16	0		0.588137	0.944422	0.101688	0.993424	1.93586	0.0295574	0.0313279	1.25925	3.01829	0.950236	0.757715	0.189059
15564	Regions/COXKO	14553.7	8182.16	0		0.648531	0.802385	0.100797	0.923675	1.36114	0.151766	0.175591	1.4801	3.45228	0.514236	0.757789	0.235228
15565	Regions/COXKO	14633.7	8182.16	0		0.630707	0.817358	0.0828168	0.723973	1.5043	0.0225175	0.021717	1.30384	2.9855	0.526378	0.799927	0.176981
15566	Regions/COXKO	14713.7	8182.16	0		0.645333	0.798981	0.110659	1.02158	2.1083	0.392417	0.476346	1.29053	2.92655	0.0676991	0.604252	0.239018
15567	Regions/COXKO	14793.7	8182.16	0		0.614518	0.724951	0.0888868	1.15002	1.79825	0.279089	0.277456	1.55247	3.54889	0.579868	0.825136	0.26065
15568	Regions/COXKO	14873.7	8182.16	0		0.641963	0.817199	0.103128	1.51346	1.33116	0.0231946	0.0270717	1.39993	3.56861	0.0627702	0.905521	0.340975
15569	Regions/COXKO	14953.7	8182.16	0		0.53438	0.675504	0.0858042	0.0668628	1.57728	0.0373189	0.0291258	1.50381	4.32893	0.0752663	0.872455	0.0166253
15570	Regions/COXKO	15033.7	8182.16	0		0.94661	1.47748	0.321769	1.07476	1.05911	1.08278	1.08419	0.702875	2.30818	1.20983	0.788314	0.654784
15571	Regions/COXKO	15113.7	8182.16	0		0.94661	1.47748	0.321769	1.07476	1.05911	1.08278	1.08419	0.702875	2.30818	1.20983	0.788314	0.654784
15601	Regions/COXKO	12713.7	8102.16	0		0.79157	0.951894	0.0903381	1.22179	1.00065	0.247319	0.26533	1.11985	3.21672	0.0598896	0.467908	0.197995
15602	Regions/COXKO	12793.7	8102.16	0		0.669835	1.14376	0.0903883	0.812038	1.26241	0.311798	0.482088	0.755261	2.31459	0.369164	0.56404	0.170387
15603	Regions/COXKO	12873.7	8102.16	0		0.675483	0.827731	0.132375	1.05394	1.29222	0.271612	0.279206	1.14314	2.71449	0.457415	0.647523	0.249385
15604	Regions/COXKO	12953.7	8102.16	0		0.722308	0.870532	0.110213	0.836547	1.2257	0.188762	0.184885	1.20579	2.5449	0.557282	0.687787	0.175822
15605	Regions/COXKO	13033.7	8102.16	0		0.736136	0.827539	0.0995232	0.765448	1.46513	0.0319026	0.0302511	1.34185	3.81833	0.0505026	0.575537	0.198826
15606	Regions/COXKO	13113.7	8102.16	0		0.693294	0.644112	0.102508	1.16402	1.34254	0.363981	0.375033	1.5084	3.24335	0.0548113	0.88694	0.25892
15607	Regions/COXKO	13193.7	8102.16	0		0.629405	0.719429	0.118522	1.36347	1.51485	0.031448	0.0334416	1.37816	3.33289	0.0615013	0.743396	0.324058
15608	Regions/COXKO	13273.7	8102.16	0		24.8656	0.782364	0.0356981	1.07476	1.05911	1.08278	1.08419	1.19799	31.7265	1.20983	0.942189	0.0359761
15609	Regions/COXKO	13353.7	8102.16	0		0.676224	0.775346	0.0938393	1.52893	1.52426	0.0273337	0.0334008	1.25726	2.82209	1.12279	0.707348	0.226143
15610	Regions/COXKO	13433.7	8102.16	0		0.698909	0.756602	0.0775787	0.51583	0.962644	0.244528	0.33802	1.0643	2.0397	0.510043	0.887065	0.166352
15611	Regions/COXKO	13513.7	8102.16	0		0.793428	1.0082	0.117001	0.763501	1.22053	0.282415	0.378617	0.969669	2.77886	0.059465	0.506184	0.123234
15612	Regions/COXKO	13593.7	8102.16	0		0.789213	1.08674	0.105533	1.40751	1.31676	0.0202925	0.0293513	1.01066	2.80621	0.603114	0.493436	0.20818
15613	Regions/COXKO	13673.7	8102.16	0		0.675494	0.770906	0.104211	0.551832	1.59879	0.188604	0.188932	1.47968	3.85235	0.419856	0.561385	0.0898155
15614	Regions/COXKO	13753.7	8102.16	0		0.664678	0.753564	0.109054	1.1305	1.32309	0.209641	0.27227	1.29328	2.68963	0.564244	0.68549	0.175325
15615	Regions/COXKO	13833.7	8102.16	0		0.734681	0.880566	0.120752	0.834678	1.24817	0.24876	0.319887	1.1477	2.56709	0.615857	0.709542	0.154224
15616	Regions/COXKO	13913.7	8102.16	0		0.821433	0.938682	0.0808741	0.778231	1.30554	0.0278616	0.032475	1.41475	2.74243	0.0619312	0.690461	0.164659
15617	Regions/COXKO	13993.7	8102.16	0		0.662474	0.770495	0.0833468	1.11211	1.28038	0.0174927	0.0165	1.48161	3.27404	0.56585	0.709067	0.194577
15618	Regions/COXKO	14073.7	8102.16	0		0.535451	0.68263	0.0900389	1.12691	1.52287	0.238493	0.310405	1.59715	3.00629	0.937686	0.890138	0.281919
15619	Regions/COXKO	14153.7	8102.16	0		0.679604	0.820612	0.102177	0.744462	1.51481	0.20143	0.205716	1.51088	3.31879	0.621425	0.772189	0.169947
15620	Regions/COXKO	14233.7	8102.16	0		0.60005	0.701864	0.12862	0.672253	1.72769	0.0240105	0.0207564	1.68374	3.19994	0.550056	0.962552	0.209691
15621	Regions/COXKO	14313.7	8102.16	0		0.793263	1.08356	0.103727	0.704195	1.10627	0.265364	0.325894	1.07264	3.66196	0.0659223	0.609175	0.164759
15622	Regions/COXKO	14393.7	8102.16	0		0.94661	1.47748	0.321769	1.07476	1.05911	1.08278	1.08419	0.702875	2.30818	1.20983	0.788314	0.654784
15623	Regions/COXKO	14473.7	8102.16	0		0.673943	0.816886	0.120287	1.33086	1.21407	0.0301532	0.0325835	1.30433	3.23914	0.0664027	0.888002	0.353611
15624	Regions/COXKO	14553.7	8102.16	0		21.644	1.47748	0.321769	1.07476	1.05911	1.08278	1.08419	0.702875	2.30818	1.20983	0.788314	0.654784
15625	Regions/COXKO	14633.7	8102.16	0		0.0431427	0.132137	0.321769	1.07476	1.05911	1.08278	1.08419	7.85912	22.7723	1.20983	0.788314	0.654784
15660	Regions/COXKO	12633.7	8022.16	0		0.856406	1.04666	0.246641	24.6827	21.8589	1.08278	1.08419	1.03141	1.74738	1.20983	0.0509185	0.971309
15661	Regions/COXKO	12713.7	8022.16	0		0.642901	0.730573	0.152518	0.893406	1.34976	0.249292	0.286102	1.1939	3.22691	0.542458	0.646899	0.231187
15662	Regions/COXKO	12793.7	8022.16	0		0.595249	0.689559	0.124402	0.894364	1.29059	0.305386	0.474056	1.27503	2.39177	0.0440047	0.671602	0.201066
15663	Regions/COXKO	12873.7	8022.16	0		0.629781	0.797188	0.00564311	0.598887	1.15349	0.0296436	0.0316357	1.23306	2.48796	0.528926	0.902878	0.252084
15664	Regions/COXKO	12953.7	8022.16	0		0.678219	0.880822	0.135638	1.00612	1.41828	0.246797	0.253709	1.26974	2.90317	0.340281	0.624746	0.213501
15665	Regions/COXKO	13033.7	8022.16	0		0.593781	0.776513	0.116759	0.974458	1.44435	0.221716	0.200015	1.46229	3.09411	0.346301	0.740049	0.231911
15666	Regions/COXKO	13113.7	8022.16	0		0.643902	0.702145	0.0888066	0.983452	1.29124	0.166973	0.146581	1.39666	2.73958	0.470933	0.943013	0.287427
15667	Regions/COXKO	13193.7	8022.16	0		0.708504	0.855484	0.145552	0.963353	1.1739	0.205479	0.224096	1.24863	3.62482	0.0500249	0.625731	0.234855
15668	Regions/COXKO	13273.7	8022.16	0		0.645789	0.667291	0.122638	0.743794	1.02606	0.0202717	0.0196521	1.3558	2.79887	0.0347418	0.843722	0.202388
15669	Regions/COXKO	13353.7	8022.16	0		0.658884	0.714534	0.115183	0.72571	1.2835	0.19115	0.177021	1.50235	3.04054	0.470225	0.837498	0.169904
15670	Regions/COXKO	13433.7	8022.16	0		0.60968	0.81207	0.121885	0.661049	1.25886	0.341408	0.356985	1.1288	2.54148	0.48924	0.838877	0.199019
15671	Regions/COXKO	13513.7	8022.16	0		0.790268	1.00512	0.151297	23.7691	40.1537	0.0452762	0.0492496	1.0347	2.3139	1.20983	0.645909	0.378854
15672	Regions/COXKO	13593.7	8022.16	0		0.665055	0.833201	0.111787	0.0538481	1.24204	0.039775	0.0471304	1.29821	3.31739	0.0606159	0.918054	0.0143551
15673	Regions/COXKO	13673.7	8022.16	0		0.641264	0.898917	0.102978	0.681449	1.55062	0.174184	0.163117	1.03142	2.70037	0.443821	0.527369	0.17663
15674	Regions/COXKO	13753.7	8022.16	0		0.696853	0.857307	0.104658	1.02172	1.49128	0.183845	0.187362	1.23089	2.83485	0.528564	0.594825	0.171188
15675	Regions/COXKO	13833.7	8022.16	0		0.716793	0.743645	0.0925281	0.861646	1.56432	0.244964	0.196249	1.42738	2.87954	0.379049	0.877148	0.21948
15676	Regions/COXKO	13913.7	8022.16	0		0.760895	0.7345	0.146524	0.0519961	1.72143	0.664894	16.2934	1.35773	2.09756	0.0585311	0.548347	0.0155573
15677	Regions/COXKO	13993.7	8022.16	0		0.94661	1.47748	0.321769	1.07476	1.05911	1.08278	1.08419	0.702875	2.30818	1.20983	0.788314	0.654784
15678	Regions/COXKO	14073.7	8022.16	0		0.669736	0.714216	0.0936289	1.16302	1.60869	0.36118	0.36381	1.78055	3.15925	0.0463197	0.857655	0.247558
15679	Regions/COXKO	14153.7	8022.16	0		0.94661	1.47748	0.321769	1.07476	1.05911	1.08278	1.08419	0.702875	2.30818	1.20983	0.788314	0.654784
15680	Regions/COXKO	14233.7	8022.16	0		0.642965	0.728034	0.0968885	0.709126	1.1122	0.159912	0.122108	1.77201	3.41991	0.561034	0.869834	0.19843
15681	Regions/COXKO	14313.7	8022.16	0		0.94661	1.47748	0.321769	1.07476	1.05911	1.08278	1.08419	0.702875	2.30818	1.20983	0.788314	0.654784
15682	Regions/COXKO	14393.7	8022.16	0		0.732357	1.12172	0.160083	1.07476	1.35942	0.05046	0.0736901	1.00242	2.57672	17.9823	0.73954	0.0290873
15720	Regions/COXKO	12633.7	7942.16	0		0.778279	1.0805	0.136025	0.893299	1.10222	0.0231987	0.0269159	1.11318	3.0287	0.385821	0.625461	0.20343
15721	Regions/COXKO	12713.7	7942.16	0		0.582803	0.821233	0.160953	0.730866	1.36767	0.221077	0.238407	1.33336	2.63586	0.532702	0.740213	0.183311
15722	Regions/COXKO	12793.7	7942.16	0		0.577754	0.900101	0.115425	1.12762	1.44858	0.240978	0.261622	1.08972	2.57484	0.0343276	0.659289	0.27787
15723	Regions/COXKO	12873.7	7942.16	0		0.56293	0.743614	0.139754	1.11702	1.01921	0.0191246	0.0239476	1.41028	2.68072	0.372051	0.658919	0.291204
15724	Regions/COXKO	12953.7	7942.16	0		0.609349	0.671752	0.112898	0.950281	1.17606	0.260267	0.241094	1.48759	3.12781	0.473746	0.800901	0.277709
15725	Regions/COXKO	13033.7	7942.16	0		0.646131	0.679097	0.0843053	0.879089	1.69004	0.158281	0.114348	1.48691	3.46197	0.539937	0.903577	0.248747
15726	Regions/COXKO	13113.7	7942.16	0		0.65793	0.647293	0.0982548	0.751519	1.33879	0.140488	0.141098	1.53381	3.02951	0.498296	0.959036	0.239099
15727	Regions/COXKO	13193.7	7942.16	0		0.745946	0.782072	0.121666	0.903713	1.54068	0.206166	0.253707	1.49262	3.32832	0.0438577	0.704597	0.210007
15728	Regions/COXKO	13273.7	7942.16	0		0.807451	0.642041	0.0962344	1.09325	1.56111	0.232159	0.249022	1.60816	3.56775	0.463179	0.60658	0.194811
15729	Regions/COXKO	13353.7	7942.16	0		0.582267	0.658814	0.100048	0.679485	1.18405	0.0183681	0.0190021	1.50615	2.74899	0.659654	1.00568	0.245625
15730	Regions/COXKO	13433.7	7942.16	0		0.642741	0.676811	0.0962563	0.70366	1.36106	0.0188186	0.0157217	1.42309	2.77731	0.646403	0.82994	0.187426
15731	Regions/COXKO	13513.7	7942.16	0		0.745625	1.00978	0.0962157	0.711295	1.20107	0.332364	0.485872	0.90426	2.01912	0.35079	0.684454	0.170241
15732	Regions/COXKO	13593.7	7942.16	0		0.694046	0.900531	0.145786	0.0587128	1.14065	0.372822	0.541926	1.24115	2.51619	0.066092	0.819042	0.0122102
15733	Regions/COXKO	13673.7	7942.16	0		0.827179	0.897423	0.140185	0.677101	1.35319	0.312444	0.390863	1.18302	2.59466	0.29659	0.5044	0.122254
15734	Regions/COXKO	13753.7	7942.16	0		0.762628	0.840704	0.0887025	0.661628	1.44443	0.331045	0.341289	1.24931	2.73507	0.389388	0.632856	0.151962
15735	Regions/COXKO	13833.7	7942.16	0		0.687687	0.928286	0.113134	1.02097	1.46473	0.0237946	0.0236066	1.23677	2.9267	0.0590659	0.561793	0.163747
15736	Regions/COXKO	13913.7	7942.16	0		0.752271	0.943385	0.113335	1.52994	1.7327	0.0288955	0.0401062	1.23436	2.45631	0.0860825	0.636374	0.226977
15737	Regions/COXKO	13993.7	7942.16	0		0.715468	0.741751	0.100045	0.917401	1.52928	0.219425	0.183798	1.53532	3.20937	0.597858	0.764131	0.193203
15738	Regions/COXKO	14073.7	7942.16	0		0.683407	0.738012	0.178797	1.07476	1.91267	0.0310164	0.0512751	1.37734	3.04566	1.20983	0.712593	0.0187244
15739	Regions/COXKO	14153.7	7942.16	0		0.94661	10.6727	0.321769	1.07476	1.05911	1.08278	1.08419	0.702875	2.30818	1.20983	0.788314	0.654784
15740	Regions/COXKO	14233.7	7942.16	0		0.636675	1.01425	0.136006	0.555904	1.23615	0.0284956	0.0279661	1.10967	3.32894	0.530648	0.575669	0.153562
15741	Regions/COXKO	14313.7	7942.16	0		0.94661	1.47748	0.321769	1.07476	1.05911	1.08278	1.08419	0.702875	2.30818	1.20983	0.788314	0.654784
15779	Regions/COXKO	12553.7	7862.16	0		0.94661	1.47748	0.321769	1.07476	1.05911	1.08278	1.08419	0.702875	2.30818	1.20983	0.788314	0.654784
15780	Regions/COXKO	12633.7	7862.16	0		0.799486	1.03238	0.126077	1.24121	1.01691	0.277886	0.356972	1.08302	2.6843	0.576949	0.501619	0.165694
15781	Regions/COXKO	12713.7	7862.16	0		0.635575	0.764537	0.120669	0.735486	1.2429	0.208084	0.234701	1.39822	2.88097	0.31627	0.761843	0.179605
15782	Regions/COXKO	12793.7	7862.16	0		0.613741	0.800053	0.122317	0.756003	1.2639	0.27748	0.252332	1.30647	2.64259	0.434977	0.829766	0.247438
15783	Regions/COXKO	12873.7	7862.16	0		0.543699	0.712325	0.112314	0.600508	1.1589	0.0166553	0.0168826	1.45054	3.35985	0.493298	0.814089	0.1796
15784	Regions/COXKO	12953.7	7862.16	0		0.585399	0.623456	0.112913	1.03022	1.49567	0.15421	0.116746	1.70215	3.12609	0.63988	0.863265	0.215257
15785	Regions/COXKO	13033.7	7862.16	0		0.637091	0.675386	0.109697	0.894089	1.24424	0.240243	0.25935	1.4833	3.40125	0.0352301	0.784536	0.242536
15786	Regions/COXKO	13113.7	7862.16	0		0.616995	0.735108	0.101105	0.806932	1.37859	0.215416	0.252193	1.4286	2.89454	0.595489	0.83549	0.199185
15787	Regions/COXKO	13193.7	7862.16	0		0.677091	0.74078	0.0943128	1.23033	1.40625	0.0198133	0.0174819	1.60103	3.24383	0.559558	0.700344	0.234315
15788	Regions/COXKO	13273.7	7862.16	0		0.633356	0.675915	0.103745	0.849079	1.39243	0.207901	0.242207	1.46334	2.93219	0.462953	0.844185	0.205949
15789	Regions/COXKO	13353.7	7862.16	0		0.557992	0.678728	0.107651	0.806485	1.69708	0.187149	0.163785	1.59462	2.95278	0.54874	0.985371	0.237763
15790	Regions/COXKO	13433.7	7862.16	0		0.656168	0.743754	0.113299	0.899337	1.3637	0.2457	0.260815	1.46034	2.84919	0.379987	0.808527	0.268516
15791	Regions/COXKO	13513.7	7862.16	0		0.867218	1.06186	0.119307	0.882124	1.2818	0.224386	0.262709	1.0738	2.43963	0.0607505	0.456712	0.110014
15792	Regions/COXKO	13593.7	7862.16	0		0.694802	0.751835	0.10652	0.864918	1.31284	0.199814	0.222555	1.27176	2.66908	0.4232	0.795295	0.219587
15793	Regions/COXKO	13673.7	7862.16	0		0.835292	0.872348	0.184015	1.07476	1.05911	0.038949	1.08419	1.09896	2.26811	1.20983	0.430644	0.0184761
15794	Regions/COXKO	13753.7	7862.16	0		0.743122	0.740336	0.102241	0.894513	1.40196	0.249058	0.304035	1.50742	2.72875	0.0432185	0.746143	0.192994
15795	Regions/COXKO	13833.7	7862.16	0		0.82147	0.949824	0.156424	18.6975	1.24878	0.0271049	0.0619419	0.942048	2.50564	1.20983	0.520594	0.261674
15796	Regions/COXKO	13913.7	7862.16	0		0.6891	0.867551	0.0981179	0.768329	1.20834	0.144625	0.140503	1.23287	2.63085	0.442064	0.767089	0.19834
15797	Regions/COXKO	13993.7	7862.16	0		0.65111	0.834956	0.143402	0.885792	1.22483	0.0208948	0.0220485	1.28888	2.77191	0.542682	0.737861	0.200264
15798	Regions/COXKO	14073.7	7862.16	0		0.865907	0.964529	0.124158	0.824588	1.63223	0.0253664	0.0295205	1.24443	2.7051	0.0593003	0.656044	0.160495
15799	Regions/COXKO	14153.7	7862.16	0		0.699115	0.802667	0.0971956	0.925855	1.43014	0.249409	0.275543	1.4893	3.49239	0.557062	0.883431	0.23164
15800	Regions/COXKO	14233.7	7862.16	0		0.699817	0.789101	0.120239	0.928227	1.23301	0.0222606	0.0296608	1.38337	3.16743	0.0457767	0.624635	0.204064
15801	Regions/COXKO	14313.7	7862.16	0		0.94661	1.47748	6.3366	1.07476	1.05911	1.08278	1.08419	0.702875	2.30818	1.20983	0.788314	0.654784
15839	Regions/COXKO	12553.7	7782.16	0		0.94661	1.47748	0.321769	1.07476	1.05911	1.08278	1.08419	0.702875	2.30818	1.20983	0.788314	0.654784
15840	Regions/COXKO	12633.7	7782.16	0		0.802489	1.10957	0.125228	1.10259	1.32652	0.169788	0.207258	0.979427	3.26741	0.6906	0.49695	0.146342
15841	Regions/COXKO	12713.7	7782.16	0		0.681626	0.976454	0.164997	0.66511	1.44574	0.230011	0.228134	1.19138	2.61112	0.312999	0.617405	0.201018
15842	Regions/COXKO	12793.7	7782.16	0		0.568654	0.870273	0.113531	0.742588	1.30868	0.217692	0.256095	1.02493	2.26162	0.352503	0.700657	0.210121
15843	Regions/COXKO	12873.7	7782.16	0		0.586214	0.78043	0.16481	0.753828	1.5872	0.272192	0.351821	1.31597	2.6031	0.757335	0.650943	0.196612
15844	Regions/COXKO	12953.7	7782.16	0		0.604542	0.872252	0.00664734	0.655122	1.30724	0.0444049	0.0311366	1.1759	3.23216	0.0474368	0.707519	0.192504
15845	Regions/COXKO	13033.7	7782.16	0		0.634172	0.613125	0.0891239	0.825706	1.43031	0.153443	0.14069	1.66706	3.64547	0.686727	0.937526	0.207508
15846	Regions/COXKO	13113.7	7782.16	0		0.700467	0.854231	0.0888326	1.02046	1.59371	0.153711	0.179113	1.02633	3.4495	0.627869	0.517998	0.1627
15847	Regions/COXKO	13193.7	7782.16	0		0.678366	0.838979	0.115075	1.00407	1.51284	0.183927	0.185635	1.2723	3.23687	0.550173	0.575774	0.172242
15848	Regions/COXKO	13273.7	7782.16	0		0.610136	0.783673	0.101491	0.842622	1.1067	0.225042	0.29402	1.31079	2.72578	0.632628	0.847554	0.18787
15849	Regions/COXKO	13353.7	7782.16	0		0.672405	0.671857	0.0943104	0.783986	1.4065	0.281613	0.269849	1.59058	3.00337	0.55364	1.08974	0.300563
15850	Regions/COXKO	13433.7	7782.16	0		0.690386	0.834693	0.106512	0.847117	1.49115	0.15642	0.163465	1.4327	2.74816	0.495058	0.625988	0.15939
15851	Regions/COXKO	13513.7	7782.16	0		0.651601	0.685474	0.0935958	0.815933	1.42129	0.204784	0.186153	1.62532	3.3986	0.47739	0.785172	0.147787
15852	Regions/COXKO	13593.7	7782.16	0		0.749769	0.929717	0.141112	0.738441	1.42151	0.284762	0.319188	1.22329	3.27514	0.0443104	0.614136	0.188663
15853	Regions/COXKO	13673.7	7782.16	0		0.033292	0.0851746	0.321769	1.07476	1.05911	1.08278	1.08419	12.1924	27.0045	1.20983	0.788314	0.654784
15854	Regions/COXKO	13753.7	7782.16	0		0.702702	0.918943	0.095889	1.19868	1.50919	0.254011	0.27385	1.22694	2.91931	0.668532	0.696503	0.20087
15855	Regions/COXKO	13833.7	7782.16	0		0.688155	0.765168	0.102748	0.881368	1.26674	0.185887	0.189771	1.38086	2.65586	0.523606	0.728741	0.198727
15856	Regions/COXKO	13913.7	7782.16	0		0.548361	0.724755	0.100991	0.672677	1.41617	0.0237266	0.0258746	1.45274	2.81651	0.0384898	0.837407	0.199415
15857	Regions/COXKO	13993.7	7782.16	0		0.783194	1.16388	0.104092	0.852935	1.1616	0.246246	0.282546	1.12909	2.93781	0.052027	0.456468	0.191535
15858	Regions/COXKO	14073.7	7782.16	0		0.869151	1.17558	0.100854	0.739271	1.535	0.235598	0.26711	1.02236	3.52864	0.046641	0.50612	0.158089
15859	Regions/COXKO	14153.7	7782.16	0		0.683883	0.911312	0.108232	0.682981	1.77676	0.217481	0.221369	1.39618	3.62674	0.59191	0.785842	0.169353
15860	Regions/COXKO	14233.7	7782.16	0		0.94661	0.16445	0.321769	1.07476	1.05911	1.08278	1.08419	6.31488	2.30818	1.20983	0.788314	0.654784
15900	Regions/COXKO	12633.7	7702.16	0		0.795125	1.09747	0.123375	0.851643	1.22886	0.235314	0.290991	0.943942	2.9985	0.0515337	0.504312	0.147961
15901	Regions/COXKO	12713.7	7702.16	0		0.661016	0.651812	0.125994	0.642835	1.07711	0.33467	0.439403	1.24791	2.45233	0.530762	0.98559	0.207924
15902	Regions/COXKO	12793.7	7702.16	0		0.672938	0.793346	0.124278	0.650941	1.22489	0.0246983	0.0296695	1.18486	2.79598	0.0452933	0.781793	0.171478
15903	Regions/COXKO	12873.7	7702.16	0		0.528491	0.663744	0.14532	0.0345523	0.962208	0.0253637	0.0418242	1.42473	2.52972	0.0388949	0.756263	0.0143509
15904	Regions/COXKO	12953.7	7702.16	0		0.704917	0.621306	0.114805	0.759734	1.61309	0.0152059	0.0143714	1.73989	3.27417	0.569176	0.913359	0.202958
15905	Regions/COXKO	13033.7	7702.16	0		0.635132	0.556614	0.0864045	0.625604	1.50497	0.472667	0.439456	1.59096	3.21316	0.0340563	0.999741	0.236637
15906	Regions/COXKO	13113.7	7702.16	0		0.676798	0.614888	0.0736462	0.951488	1.55251	0.173026	0.172419	1.62968	3.52066	0.564248	1.07499	0.257357
15907	Regions/COXKO	13193.7	7702.16	0		0.608329	0.605549	0.0906011	0.699783	1.38317	0.250996	0.35795	1.46069	2.74778	0.3612	0.942419	0.211282
15908	Regions/COXKO	13273.7	7702.16	0		0.658514	0.769719	0.0846892	1.09457	1.2536	0.237275	0.235523	1.19918	2.72941	0.658	0.694651	0.213527
15909	Regions/COXKO	13353.7	7702.16	0		0.58105	0.720858	0.153636	22.2932	1.57079	0.0384952	0.0337444	1.23622	2.86665	1.20983	0.640065	0.326476
15910	Regions/COXKO	13433.7	7702.16	0		0.722486	0.788372	0.091336	0.899585	1.58747	0.184572	0.160058	1.5105	3.11484	0.409859	0.639574	0.190705
15911	Regions/COXKO	13513.7	7702.16	0		0.569349	0.787655	0.115473	0.978113	1.4176	0.0188366	0.0179417	1.41804	2.91149	0.378136	0.789195	0.264284
15912	Regions/COXKO	13593.7	7702.16	0		0.737318	0.623499	0.0233604	1.07476	1.05911	1.08278	1.08419	1.39893	54.5128	1.20983	0.553634	0.0258058
15913	Regions/COXKO	13673.7	7702.16	0		0.849831	1.10283	0.127532	1.10191	1.39401	0.0315015	0.0304909	1.09308	2.76673	0.0587012	0.504278	0.221376
15914	Regions/COXKO	13753.7	7702.16	0		0.712259	0.716502	0.102223	1.32401	1.49971	0.209265	0.235035	1.51529	3.20821	0.673535	0.619652	0.183453
15915	Regions/COXKO	13833.7	7702.16	0		0.689377	0.738607	0.0805468	0.938745	1.1847	0.198886	0.233922	1.49578	3.2312	0.49537	1.07283	0.237322
15916	Regions/COXKO	13913.7	7702.16	0		0.656374	0.752544	0.0789282	0.902492	1.43904	0.192717	0.145908	1.59671	3.05736	0.409157	0.786643	0.204722
15917	Regions/COXKO	13993.7	7702.16	0		0.789223	1.02109	0.124266	1.02821	1.19821	0.324144	0.269055	1.1907	3.02128	0.0484821	0.688613	0.245852
15918	Regions/COXKO	14073.7	7702.16	0		0.823899	0.955324	0.111993	1.23954	1.27738	0.18377	0.163367	1.38406	3.62659	0.0585466	0.823455	0.238643
15919	Regions/COXKO	14153.7	7702.16	0		0.77738	0.858916	0.076121	0.633951	1.34602	0.0260377	0.0239117	1.46756	3.33299	0.558924	0.724087	0.179452
15960	Regions/COXKO	12633.7	7622.16	0		0.752416	1.25754	0.135467	1.07476	1.25248	0.0521719	0.0526255	0.897877	2.88262	1.20983	0.3238	0.0159563
15961	Regions/COXKO	12713.7	7622.16	0		0.744595	0.857039	0.143034	0.904533	1.33041	0.019432	0.0243329	1.35957	3.44108	0.361243	0.717897	0.231156
15962	Regions/COXKO	12793.7	7622.16	0		0.703559	0.739802	0.116058	0.780193	1.32811	0.208125	0.218141	1.48326	3.03381	0.59362	0.880401	0.20033
15963	Regions/COXKO	12873.7	7622.16	0		0.624125	0.754281	0.120865	0.928701	1.32979	0.0252687	0.0242514	1.1913	3.26717	0.0424989	0.889006	0.241823
15964	Regions/COXKO	12953.7	7622.16	0		0.644821	0.796757	0.131609	0.98256	1.90193	0.020895	0.0246568	1.3416	3.30192	0.0438933	0.582581	0.242561
15965	Regions/COXKO	13033.7	7622.16	0		0.645702	0.648416	0.101915	0.643649	1.47804	0.146171	0.152731	1.50643	3.12736	0.653027	1.16323	0.198138
15966	Regions/COXKO	13113.7	7622.16	0		0.662259	0.71181	0.0937508	1.12525	1.65656	0.189817	0.190506	1.28674	3.2193	0.873602	0.780394	0.204494
15967	Regions/COXKO	13193.7	7622.16	0		0.701423	0.814014	0.0845381	0.743012	1.34613	0.188152	0.202415	1.47515	3.6272	0.391914	0.77538	0.166704
15968	Regions/COXKO	13273.7	7622.16	0		0.63376	0.64685	0.0960608	0.65828	1.76693	0.0241435	0.0285241	1.75706	3.51258	0.371215	0.800305	0.211468
15969	Regions/COXKO	13353.7	7622.16	0		0.656237	0.685538	0.0983862	0.767319	1.56415	0.120604	0.103152	1.67531	3.7339	0.550043	0.786412	0.128035
15970	Regions/COXKO	13433.7	7622.16	0		0.707794	0.912751	0.103264	0.661458	1.21919	0.245248	0.253352	1.2376	3.6701	0.394036	0.684425	0.156742
15971	Regions/COXKO	13513.7	7622.16	0		0.697693	0.67752	0.105568	0.98929	1.44887	0.200764	0.181993	1.60249	3.13259	0.517444	0.675915	0.183611
15972	Regions/COXKO	13593.7	7622.16	0		0.69024	0.717477	0.116269	0.704208	1.49843	0.153359	0.170785	1.56033	3.29588	0.5576	0.812734	0.17002
15973	Regions/COXKO	13673.7	7622.16	0		0.623085	0.932089	0.118782	0.787151	1.40309	0.283675	0.385302	1.2608	3.07458	0.0417906	0.632855	0.179544
15974	Regions/COXKO	13753.7	7622.16	0		0.806895	1.02279	0.12224	16.7852	1.58021	0.0306963	0.0418036	0.964686	2.95226	1.20983	0.471263	0.217292
15975	Regions/COXKO	13833.7	7622.16	0		0.640132	0.808294	0.00995725	19.7179	1.29606	0.0416386	0.046696	1.272	3.92965	1.20983	0.510262	0.315526
15976	Regions/COXKO	13913.7	7622.16	0		0.758344	0.79477	0.115499	1.10099	1.16749	0.023915	0.0252914	1.24304	2.77771	0.0688188	0.877589	0.223987
15977	Regions/COXKO	13993.7	7622.16	0		0.857547	1.06927	0.127395	0.657939	1.33265	0.272107	0.334012	1.17956	3.10014	0.0626015	0.521006	0.112225
16020	Regions/COXKO	12633.7	7542.16	0		0.94661	1.47748	0.321769	1.07476	1.05911	1.08278	1.08419	0.702875	2.30818	1.20983	0.788314	0.654784
16021	Regions/COXKO	12713.7	7542.16	0		0.775416	1.2502	0.169548	1.46074	1.24081	0.427896	0.462038	0.98412	3.45965	0.0888711	0.70472	0.238588
16022	Regions/COXKO	12793.7	7542.16	0		0.619443	0.68181	0.118338	0.885775	1.58352	0.172286	0.153053	1.85823	3.82676	0.517117	1.03525	0.237628
16023	Regions/COXKO	12873.7	7542.16	0		0.601311	0.812495	0.0842861	0.653075	1.40851	0.153334	0.152578	1.30579	4.00602	0.61137	0.697677	0.11716
16024	Regions/COXKO	12953.7	7542.16	0		0.714693	0.680928	0.0971289	0.910269	1.4679	0.140188	0.125831	1.54314	3.56364	0.716518	0.849674	0.202023
16025	Regions/COXKO	13033.7	7542.16	0		0.631489	0.760413	0.119076	0.866286	1.36283	0.288031	0.263214	1.43976	3.14078	0.490713	0.82228	0.267013
16026	Regions/COXKO	13113.7	7542.16	0		0.624719	0.694596	0.0942499	0.943471	1.49164	0.207073	0.18592	1.59463	3.24756	0.64029	0.736411	0.213151
16027	Regions/COXKO	13193.7	7542.16	0		0.638991	0.757708	0.085434	0.745616	1.36801	0.223433	0.243345	1.56467	2.98756	0.395945	0.994288	0.289242
16028	Regions/COXKO	13273.7	7542.16	0		0.657988	0.734674	0.109492	0.766385	1.32916	0.183182	0.174494	1.46987	3.18465	0.472716	0.813346	0.216488
16029	Regions/COXKO	13353.7	7542.16	0		0.735501	1.05581	0.121301	0.70184	1.43895	0.295038	0.348607	1.01195	3.06978	0.0536415	0.494378	0.129499
16030	Regions/COXKO	13433.7	7542.16	0		0.736902	0.839291	0.155259	16.5712	1.33486	0.516767	0.722754	1.66221	3.72122	1.20983	0.463516	0.227242
16031	Regions/COXKO	13513.7	7542.16	0		0.78405	0.805697	0.0850859	1.0232	1.15984	0.176125	0.215773	1.32312	3.12091	0.460774	0.759134	0.207931
16032	Regions/COXKO	13593.7	7542.16	0		0.94661	0.160374	0.321769	1.07476	1.05911	1.08278	1.08419	6.47538	2.30818	1.20983	0.788314	0.654784
16079	Regions/COXKO	12713.7	7462.16	0		0.696851	0.558032	0.0163715	1.07476	1.35128	1.08278	1.08419	1.45296	2.82565	1.20983	1.50939	0.03928
16080	Regions/COXKO	12793.7	7462.16	0		0.657367	0.713423	0.124629	0.907839	1.65779	0.198145	0.176479	1.51571	3.24575	0.59219	0.932196	0.221959
16081	Regions/COXKO	12873.7	7462.16	0		0.926792	1.52397	0.0173878	1.07476	1.05911	0.0445312	1.08419	0.901343	67.4739	1.20983	0.875081	0.0365243
16082	Regions/COXKO	12953.7	7462.16	0		0.593153	0.661695	0.11769	0.883742	1.53259	0.289818	0.261538	1.54307	2.71887	0.0345345	0.837362	0.22495
16083	Regions/COXKO	13033.7	7462.16	0		0.609283	0.777744	0.128385	0.585962	1.49795	0.0178005	0.0173991	1.37823	2.97732	0.717888	0.880629	0.17449
16084	Regions/COXKO	13113.7	7462.16	0		0.459336	0.597298	0.00619941	1.09339	1.35953	0.0252866	0.0302329	1.64615	3.00438	0.0764731	0.858595	0.227373
16085	Regions/COXKO	13193.7	7462.16	0		0.628467	0.790883	0.0974053	1.44411	1.59591	0.0206855	0.0250115	1.34738	3.04875	0.0803505	0.635191	0.17728
16086	Regions/COXKO	13273.7	7462.16	0		0.662226	0.787655	0.111102	0.747639	1.68606	0.0180775	0.0222952	1.32392	3.07434	0.644507	0.69281	0.159904
16087	Regions/COXKO	13353.7	7462.16	0		0.734841	0.886893	0.149707	0.944217	1.47532	0.336573	0.429969	1.20789	3.1878	0.0705409	0.6578	0.201314
16088	Regions/COXKO	13433.7	7462.16	0		0.733777	1.03827	0.115615	0.711489	1.60099	0.21532	0.234917	1.04925	2.86552	0.0610422	0.561065	0.121965
16089	Regions/COXKO	13513.7	7462.16	0		0.76077	1.02761	0.113277	1.02983	1.03526	0.0263726	0.0447421	1.08679	3.09427	0.620352	0.777577	0.230073
16090	Regions/COXKO	13593.7	7462.16	0		0.709713	1.3179	0.0182052	1.07476	1.05911	1.08278	1.08419	0.786454	43.5685	1.20983	0.788314	0.654784
16136	Regions/COXKO	12713.7	7382.16	0		0.531466	0.920127	0.154961	1.07476	1.95952	0.0584086	1.08419	1.37282	2.69785	1.20983	0.758048	0.0264205
16137	Regions/COXKO	12793.7	7382.16	0		0.663272	0.634745	0.13131	0.891573	1.46617	0.209807	0.16298	1.5851	2.89277	0.514267	1.09083	0.263182
16138	Regions/COXKO	12873.7	7382.16	0		0.607003	0.668143	0.103359	0.698012	1.44182	0.320947	0.307133	1.4645	2.8977	0.469034	0.786597	0.193828
16139	Regions/COXKO	12953.7	7382.16	0		0.438522	0.626794	0.183924	1.07476	34.6866	0.0317894	1.08419	1.30003	3.55993	1.20983	0.930672	0.0202217
16140	Regions/COXKO	13033.7	7382.16	0		0.686769	0.868368	0.100734	1.00063	1.53045	0.236098	0.255151	1.24685	3.40168	0.0421331	0.617448	0.227251
16141	Regions/COXKO	13113.7	7382.16	0		0.716857	0.86154	0.108857	1.14102	1.19341	0.20841	0.245687	1.28885	3.08903	0.409552	0.544207	0.171479
16142	Regions/COXKO	13193.7	7382.16	0		0.621498	0.95189	0.0791358	0.68875	1.65221	0.235267	0.284758	1.07276	3.0071	0.0470296	0.550709	0.144327
16143	Regions/COXKO	13273.7	7382.16	0		0.882205	1.10728	0.105281	1.1316	1.51344	0.209413	0.239905	1.15342	2.73059	0.582915	0.454539	0.149354
16144	Regions/COXKO	13353.7	7382.16	0		0.731721	0.871686	0.0747769	1.32336	1.26931	0.268179	0.270116	1.30176	2.74598	0.071931	0.530836	0.209795
16145	Regions/COXKO	13433.7	7382.16	0		0.694987	1.0042	0.111274	1.20514	1.21357	0.291004	0.319987	1.16421	3.48542	0.927367	0.831478	0.206499
16146	Regions/COXKO	13513.7	7382.16	0		0.715903	1.18696	0.129305	1.59917	1.33765	0.241836	0.352266	1.04953	3.1352	0.123228	0.490635	0.164622
16147	Regions/COXKO	13593.7	7382.16	0		0.784331	0.805679	0.108846	0.8699	1.4401	0.0382904	0.0375174	1.33892	3.08515	0.0510228	0.776445	0.260197
16148	Regions/COXKO	13673.7	7382.16	0		0.700999	0.815645	0.0901196	1.04457	1.45149	0.217062	0.211441	1.31099	3.40534	0.371631	0.649735	0.196136
16193	Regions/COXKO	12793.7	7302.16	0		0.749364	0.98513	0.123112	0.827324	1.24597	0.242855	0.266417	1.12949	3.27189	0.0463402	0.616253	0.165264
16194	Regions/COXKO	12873.7	7302.16	0		0.615941	0.634067	0.102419	1.07123	1.44979	0.221649	0.228633	1.58415	3.14786	0.471363	0.92848	0.305477
16195	Regions/COXKO	12953.7	7302.16	0		0.570972	0.551045	0.0761685	0.708954	1.54838	0.0242559	0.0207149	1.86829	3.32387	0.413815	1.08858	0.30082
16196	Regions/COXKO	13033.7	7302.16	0		0.562017	0.676342	0.14628	1.3252	1.91819	0.032568	0.0222618	1.48602	3.39546	0.0658515	0.883566	0.246378
16197	Regions/COXKO	13113.7	7302.16	0		0.655806	0.73664	0.144997	0.755843	1.41964	0.0187791	0.0207101	1.57609	3.33387	0.380697	0.795472	0.163285
16198	Regions/COXKO	13193.7	7302.16	0		0.592007	0.758528	0.0994807	0.844958	1.55311	0.13977	0.118937	1.56694	3.4448	0.588761	0.622523	0.177306
16199	Regions/COXKO	13273.7	7302.16	0		0.856877	0.915646	0.100858	0.786072	1.64128	0.185509	0.251799	1.45886	4.45523	0.0583743	0.575795	0.125476
16200	Regions/COXKO	13353.7	7302.16	0		0.807649	0.94589	0.153468	0.87265	1.04428	0.0285372	0.0350919	1.19444	3.35782	0.0458236	0.587106	0.235975
16201	Regions/COXKO	13433.7	7302.16	0		0.709907	0.934097	0.138427	0.569098	0.951844	0.32523	0.39027	1.24859	3.71503	0.0512573	0.681302	0.16589
16202	Regions/COXKO	13513.7	7302.16	0		0.757792	0.964338	0.152941	0.813791	1.10209	0.0266779	0.0323157	1.28285	3.47026	0.428548	0.785163	0.200014
16203	Regions/COXKO	13593.7	7302.16	0		0.733892	1.20137	0.163659	0.934431	1.43698	0.363616	0.495093	1.12691	3.28296	0.0587653	0.574496	0.187371
16204	Regions/COXKO	13673.7	7302.16	0		0.709392	0.978477	0.164526	0.0485734	1.29914	0.026733	0.0400064	1.2581	3.11609	0.0546782	0.684332	0.0155385
16205	Regions/COXKO	13753.7	7302.16	0		0.94661	1.3594	0.0480968	1.07476	1.05911	1.08278	1.08419	0.990152	2.30818	1.20983	0.788314	0.654784
16248	Regions/COXKO	12793.7	7222.16	0		0.738448	0.945656	0.107326	0.70874	1.71114	0.0371717	0.049157	1.28129	3.4983	0.0635299	1.02518	0.233124
16249	Regions/COXKO	12873.7	7222.16	0		0.651289	0.640234	0.0968731	0.850583	1.56944	0.119461	0.120374	1.75594	3.70548	0.651	0.95895	0.214961
16250	Regions/COXKO	12953.7	7222.16	0		0.665565	0.653515	0.0994584	0.753903	1.44578	0.0195951	0.0174972	1.62255	3.62488	0.536468	0.959331	0.18054
16251	Regions/COXKO	13033.7	7222.16	0		0.720634	0.666664	0.120348	1.09546	1.66668	0.0214915	0.0218453	1.48638	2.83512	0.650593	0.767523	0.231891
16252	Regions/COXKO	13113.7	7222.16	0		0.473629	0.900171	0.00859136	1.07476	20.0347	1.08278	1.08419	1.13588	3.97671	1.20983	0.495939	0.0219523
16253	Regions/COXKO	13193.7	7222.16	0		0.602186	0.634476	0.0815848	0.770584	1.40737	0.0240751	0.0243711	1.57179	3.42049	1.35788	1.07627	0.217138
16254	Regions/COXKO	13273.7	7222.16	0		0.654051	0.623905	0.103437	0.879543	1.32456	0.164731	0.14492	1.66031	3.30529	0.542307	1.06992	0.248496
16255	Regions/COXKO	13353.7	7222.16	0		0.0324169	1.03273	0.030318	1.07476	0.0532764	1.08278	1.08419	1.19352	2.68679	1.20983	0.0588706	0.0488987
16256	Regions/COXKO	13433.7	7222.16	0		0.798225	1.0018	0.122473	1.33158	1.3255	0.183387	0.255436	1.22588	3.65278	0.0923364	0.564937	0.155304
16257	Regions/COXKO	13513.7	7222.16	0		0.943187	1.04273	0.108553	0.948877	1.16649	0.223406	0.27462	1.14551	3.22406	0.0667395	0.635771	0.194213
16258	Regions/COXKO	13593.7	7222.16	0		0.757824	0.86004	0.0884368	0.974133	1.10941	0.248632	0.225013	1.30151	2.63968	0.0678467	0.59676	0.143281
16259	Regions/COXKO	13673.7	7222.16	0		0.719937	0.742888	0.11746	24.4329	1.20985	0.0263093	0.0228839	1.44668	3.0644	1.20983	0.623638	0.255011
16260	Regions/COXKO	13753.7	7222.16	0		1.64979	1.43066	0.0147448	1.07476	14.8772	1.08278	0.0651421	0.727265	41.8225	1.20983	0.458414	0.0196917
16303	Regions/COXKO	12873.7	7142.16	0		0.713777	1.09512	0.104639	0.947274	1.75425	0.141731	0.201963	0.987505	3.54727	0.36868	0.516756	0.1542
16304	Regions/COXKO	12953.7	7142.16	0		0.663966	0.791643	0.099057	0.970157	1.38764	0.255494	0.223641	1.29346	3.00125	0.53491	0.673066	0.200753
16305	Regions/COXKO	13033.7	7142.16	0		0.613378	0.698012	0.0972851	0.618263	1.40689	0.208957	0.182054	1.46001	2.98992	0.605396	0.960333	0.192003
16306	Regions/COXKO	13113.7	7142.16	0		0.580623	0.777758	0.115373	0.787021	1.97081	0.0257067	0.0257463	1.30151	2.34952	0.0545313	0.600185	0.156136
16307	Regions/COXKO	13193.7	7142.16	0		0.621661	0.630208	0.0843011	0.896822	1.66856	0.145433	0.145577	1.75724	3.60031	0.469338	0.902811	0.284671
16308	Regions/COXKO	13273.7	7142.16	0		0.633557	0.729201	0.110145	0.724734	1.46414	0.226831	0.213767	1.45302	3.11014	0.455053	0.781025	0.192575
16309	Regions/COXKO	13353.7	7142.16	0		0.761679	0.940704	0.101798	1.02367	1.283	0.0290019	0.0316128	1.22784	3.62139	0.0703321	0.529377	0.150233
16310	Regions/COXKO	13433.7	7142.16	0		0.889814	0.883477	0.147107	1.55926	1.24995	0.421125	0.835338	1.24938	3.57456	0.0947123	0.678754	0.282918
16311	Regions/COXKO	13513.7	7142.16	0		0.856288	1.41925	0.163695	0.935592	1.2316	0.038895	0.0562006	0.798346	2.99627	0.103848	0.71693	0.163578
16312	Regions/COXKO	13593.7	7142.16	0		0.744146	1.02857	0.0994308	0.671479	1.52581	0.0336346	0.0429085	1.11377	3.56404	0.0552827	0.574599	0.166204
16313	Regions/COXKO	13673.7	7142.16	0		0.707184	0.923217	0.153361	0.729644	1.26713	0.174842	0.179753	1.27338	2.52891	0.0305446	0.618669	0.20434
16314	Regions/COXKO	13753.7	7142.16	0		0.68618	0.861439	0.271327	1.07476	29.6451	0.052005	1.08419	1.19313	3.69256	1.20983	1.03405	0.0309398
16315	Regions/COXKO	13833.7	7142.16	0		0.94661	1.47748	0.321769	1.07476	1.05911	1.08278	1.08419	0.702875	2.30818	1.20983	0.788314	0.654784
16355	Regions/COXKO	12873.7	7062.16	0		0.708975	1.04557	0.139799	0.950615	1.66813	0.220404	0.318247	1.16359	2.94906	0.0689183	0.70549	0.171866
16356	Regions/COXKO	12953.7	7062.16	0		0.642678	1.22457	0.105702	0.0409289	1.33676	0.0365049	0.0506505	0.86935	3.27322	0.0460729	0.925118	0.0174447
16357	Regions/COXKO	13033.7	7062.16	0		0.677473	0.781682	0.140743	0.616539	1.75948	0.0200871	0.0232176	1.30314	4.03748	0.037001	0.824849	0.162577
16358	Regions/COXKO	13113.7	7062.16	0		0.606517	0.730963	0.122406	28.0139	1.6387	0.0281449	0.0303934	1.25669	2.6148	1.20983	0.784488	0.30721
16359	Regions/COXKO	13193.7	7062.16	0		0.608037	0.699495	0.113392	1.40532	1.54751	0.16908	0.189453	1.54523	2.70398	0.584844	0.751821	0.250351
16360	Regions/COXKO	13273.7	7062.16	0		0.688611	0.902709	0.146705	0.0525538	1.28159	0.0352931	0.0483012	1.08613	2.63198	0.0591589	0.534535	0.0128368
16361	Regions/COXKO	13353.7	7062.16	0		0.686673	0.872553	0.148466	1.07476	1.84192	0.0306357	0.0389047	1.22093	2.16401	1.20983	0.617376	0.0128944
16362	Regions/COXKO	13433.7	7062.16	0		0.767742	0.912447	0.102615	1.02616	1.49732	0.0339966	0.0498392	1.26088	3.17617	0.0839362	0.622215	0.187549
16363	Regions/COXKO	13513.7	7062.16	0		0.524464	0.940135	0.0176876	1.07476	1.05911	1.08278	1.08419	1.12812	2.25887	1.20983	0.788314	0.654784
16364	Regions/COXKO	13593.7	7062.16	0		0.743729	0.785609	0.160652	1.2616	1.44914	0.247798	0.226033	1.57366	2.88007	0.452006	0.66548	0.216294
16365	Regions/COXKO	13673.7	7062.16	0		0.690953	0.822052	0.140136	0.790449	1.43683	0.0211111	0.0189766	1.63326	3.28442	0.543791	0.853608	0.217072
16366	Regions/COXKO	13753.7	7062.16	0		0.64101	0.850562	0.11824	1.07476	1.25634	0.0442476	0.054357	1.23882	3.54238	1.20983	0.873673	0.0201542
16367	Regions/COXKO	13833.7	7062.16	0		0.94661	1.47748	0.321769	1.07476	1.05911	1.08278	1.08419	0.702875	2.30818	1.20983	0.788314	0.654784
16406	Regions/COXKO	12873.7	6982.16	0		0.676709	0.910102	0.0152429	1.07476	19.8765	0.044876	1.08419	1.3407	3.58667	1.20983	0.484271	0.0165366
16407	Regions/COXKO	12953.7	6982.16	0		0.684173	0.895313	0.0885505	0.712676	1.18877	0.213407	0.328566	1.03463	2.54785	0.363938	0.722761	0.181685
16408	Regions/COXKO	13033.7	6982.16	0		0.668968	0.772546	0.136422	0.862041	1.58286	0.250532	0.279588	1.33748	3.06507	0.496003	0.962492	0.285272
16409	Regions/COXKO	13113.7	6982.16	0		0.562369	0.747383	0.102044	0.631881	1.77939	0.0270029	0.0209789	1.37445	2.66056	0.562145	0.758448	0.159953
16410	Regions/COXKO	13193.7	6982.16	0		0.701611	0.73867	0.123009	0.780129	1.59781	0.0203963	0.0179089	1.39932	2.56553	0.0301431	0.782817	0.237783
16411	Regions/COXKO	13273.7	6982.16	0		0.606636	0.695281	0.094425	0.739951	1.40762	0.175574	0.149216	1.4831	2.98937	0.530549	0.726391	0.193603
16412	Regions/COXKO	13353.7	6982.16	0		0.666855	0.706234	0.0721622	0.664036	1.34368	0.0236331	0.0233552	1.61146	2.85214	0.0438875	1.0077	0.203066
16413	Regions/COXKO	13433.7	6982.16	0		0.76825	0.817252	0.156109	0.610367	1.16408	0.0336297	0.0379819	1.18674	3.07688	0.0388164	0.607953	0.215131
16414	Regions/COXKO	13513.7	6982.16	0		0.658285	0.949841	0.106376	0.671959	1.21197	0.264508	0.363318	1.28459	2.67303	0.425259	0.525132	0.142315
16415	Regions/COXKO	13593.7	6982.16	0		0.676848	0.816458	0.117929	0.585742	1.08204	0.025419	0.0202958	1.43683	3.25014	0.688131	0.961334	0.195017
16416	Regions/COXKO	13673.7	6982.16	0		0.694049	0.812256	0.109401	1.09474	1.45018	0.225642	0.201823	1.41162	3.13147	0.627542	0.691999	0.200266
16417	Regions/COXKO	13753.7	6982.16	0		0.615685	0.707865	0.186058	0.859838	1.81165	0.0514089	0.0632915	1.33373	3.31111	0.0636222	0.530816	0.249031
16418	Regions/COXKO	13833.7	6982.16	0		0.843884	1.14191	0.148733	1.11214	1.03263	0.196055	0.254009	1.03552	3.05075	0.0795151	0.636871	0.176055
16419	Regions/COXKO	13913.7	6982.16	0		0.94661	1.47748	0.321769	1.07476	1.05911	1.08278	1.08419	0.702875	2.30818	1.20983	0.788314	0.654784
16456	Regions/COXKO	12873.7	6902.16	0		0.723579	0.861162	0.0138651	1.07476	1.48566	0.0409985	1.08419	1.27452	3.42969	1.20983	12.6698	0.654784
16457	Regions/COXKO	12953.7	6902.16	0		0.650203	0.822377	0.0537662	0.607387	1.10832	0.0100139	0.0176108	1.06722	2.8273	0.3229	0.833692	0.171762
16458	Regions/COXKO	13033.7	6902.16	0		0.711788	0.868272	0.1418	0.626936	1.34131	0.02985	0.0296484	1.23208	3.8039	0.0450259	0.71434	0.175697
16459	Regions/COXKO	13113.7	6902.16	0		0.782626	0.712904	0.0889863	0.708674	1.45774	0.237814	0.267394	1.31194	2.60522	0.493698	0.800695	0.163911
16460	Regions/COXKO	13193.7	6902.16	0		0.719557	0.728969	0.105806	0.82463	1.44818	0.226137	0.233884	1.36451	2.84283	0.522922	0.673863	0.19981
16461	Regions/COXKO	13273.7	6902.16	0		0.710113	0.77885	0.105207	0.643205	1.48814	0.295274	0.395511	1.24926	2.77718	0.041333	0.761398	0.173906
16462	Regions/COXKO	13353.7	6902.16	0		0.743552	0.96798	0.140999	0.635327	1.21615	0.273205	0.337014	1.16358	3.3313	0.443936	0.599135	0.146735
16463	Regions/COXKO	13433.7	6902.16	0		0.769202	0.878764	0.0824548	1.10687	1.44414	0.290448	0.330774	1.08642	3.0332	0.533709	0.465302	0.192173
16464	Regions/COXKO	13513.7	6902.16	0		0.675998	0.738714	0.113019	0.736294	1.05402	0.30457	0.267279	1.63896	2.65887	0.589983	0.838641	0.176881
16465	Regions/COXKO	13593.7	6902.16	0		0.656408	0.661334	0.140471	0.69939	1.28244	0.298419	0.331457	1.43232	2.7356	0.406781	0.589916	0.161952
16466	Regions/COXKO	13673.7	6902.16	0		0.660189	0.74667	0.110441	0.719004	1.32897	0.312537	0.259695	1.41494	2.79857	0.420235	0.621548	0.191025
16467	Regions/COXKO	13753.7	6902.16	0		0.691173	0.662737	0.119228	0.669349	1.24162	0.0225307	0.0240801	1.57256	2.85512	0.54108	0.807146	0.183855
16468	Regions/COXKO	13833.7	6902.16	0		0.742515	0.811219	0.10863	0.527175	1.03534	0.0302018	0.0250369	1.29155	3.39409	0.471544	1.08251	0.248891
16469	Regions/COXKO	13913.7	6902.16	0		0.775187	1.25909	0.116718	1.07476	1.28818	0.0452643	0.0762378	0.886549	2.9845	1.20983	0.597919	0.0239107
16506	Regions/COXKO	12953.7	6822.16	0		0.6153	0.742089	0.0644842	0.875456	1.18573	0.196102	0.31681	1.15837	3.18774	0.831615	1.14176	0.264436
16507	Regions/COXKO	13033.7	6822.16	0		0.608736	0.744014	0.100229	0.891138	1.61791	0.151383	0.12544	1.56793	3.60377	0.511328	0.77125	0.216187
16508	Regions/COXKO	13113.7	6822.16	0		0.592316	0.53607	0.0913962	0.762689	1.60096	0.148775	0.14699	1.88038	3.43994	0.491054	1.08506	0.255466
16509	Regions/COXKO	13193.7	6822.16	0		0.691091	0.588301	0.0987779	0.987822	1.70105	0.167425	0.164915	1.58642	3.16843	0.532468	0.976702	0.295117
16510	Regions/COXKO	13273.7	6822.16	0		0.66149	0.871138	0.104623	0.831312	1.54047	0.246344	0.249716	1.30927	3.16363	0.55682	0.713827	0.194084
16511	Regions/COXKO	13353.7	6822.16	0		0.735062	0.793852	0.112942	0.713973	1.43357	0.191986	0.201962	1.3466	2.77537	0.582143	0.724395	0.143381
16512	Regions/COXKO	13433.7	6822.16	0		0.798066	0.72694	0.135397	1.23354	1.44219	0.0267753	0.0317578	1.43177	2.82458	0.653484	0.587077	0.197687
16513	Regions/COXKO	13513.7	6822.16	0		0.72511	0.787346	0.233542	1.07476	1.5378	0.0425524	0.0300268	1.26492	2.82912	1.20983	0.617837	0.0141937
16514	Regions/COXKO	13593.7	6822.16	0		0.633694	0.745207	0.0072163	0.0619315	1.83342	0.0345626	0.0324076	1.58558	2.79493	0.0697152	0.667178	0.010954
16515	Regions/COXKO	13673.7	6822.16	0		0.784643	0.971998	0.128367	0.783663	1.2137	0.155847	0.197417	1.04703	2.83213	0.466011	0.56652	0.171041
16516	Regions/COXKO	13753.7	6822.16	0		0.74199	1.03248	0.120053	0.0415083	1.05057	0.0260465	0.0350983	1.00364	2.56358	0.0467251	0.421586	0.00914622
16517	Regions/COXKO	13833.7	6822.16	0		0.658652	0.900102	0.121605	0.832754	1.21175	0.025127	0.0233535	1.32868	2.88343	0.486076	0.775295	0.224673
16518	Regions/COXKO	13913.7	6822.16	0		0.670032	1.17487	0.170331	1.20112	1.81847	0.042203	0.0503971	1.15845	2.49856	0.077755	0.677752	0.24816
16554	Regions/COXKO	12953.7	6742.16	0		0.869915	1.00077	0.102281	0.994007	1.37106	0.155261	0.254775	1.22132	4.49895	0.0750514	0.48447	0.134029
16555	Regions/COXKO	13033.7	6742.16	0		0.572665	0.564462	0.0471777	0.632172	1.52294	0.0171714	0.0134105	1.93617	4.39556	0.431139	1.27331	0.232022
16556	Regions/COXKO	13113.7	6742.16	0		0.801908	0.911614	0.174101	0.0560873	1.46182	0.416633	0.733369	1.07644	3.74886	0.847434	1.05027	0.0194088
16557	Regions/COXKO	13193.7	6742.16	0		0.686112	0.933205	0.10035	1.24729	0.922827	0.0352523	0.0495045	1.181	2.58711	0.0617253	0.584681	0.266811
16558	Regions/COXKO	13273.7	6742.16	0		0.626756	0.680904	0.0949826	1.32151	1.44934	0.0228023	0.0194605	1.49009	3.40405	0.437503	0.784658	0.347116
16559	Regions/COXKO	13353.7	6742.16	0		0.65678	0.769508	0.107183	0.874095	1.50478	0.0217647	0.0179978	1.38947	3.03569	0.602192	0.716552	0.182389
16560	Regions/COXKO	13433.7	6742.16	0		0.727988	0.726543	0.104799	0.719562	1.19913	0.221297	0.225056	1.4771	3.71892	0.754674	0.954276	0.204488
16561	Regions/COXKO	13513.7	6742.16	0		0.765756	0.741504	0.100441	1.36419	1.25374	0.22914	0.280469	1.39705	2.60472	0.542214	0.595475	0.245127
16562	Regions/COXKO	13593.7	6742.16	0		0.719478	0.792793	0.119219	0.827012	1.31085	0.237229	0.216626	1.34348	2.76731	0.474509	0.7591	0.184531
16563	Regions/COXKO	13673.7	6742.16	0		0.601468	0.711955	0.120135	0.602386	1.3686	0.222152	0.193167	1.52623	3.23816	0.520535	0.777209	0.209911
16564	Regions/COXKO	13753.7	6742.16	0		0.687294	0.862171	0.151196	0.817882	1.51611	0.0268558	0.0247609	1.23506	2.52335	0.607876	0.716217	0.27113
16565	Regions/COXKO	13833.7	6742.16	0		0.717115	0.869966	0.11672	1.01001	1.14994	0.261863	0.235213	1.27363	3.09375	0.603499	0.628898	0.175105
16566	Regions/COXKO	13913.7	6742.16	0		0.94661	0.147333	0.0454111	1.07476	1.05911	1.08278	1.08419	0.994756	24.9665	1.20983	0.0439758	0.0365269
16606	Regions/COXKO	13193.7	6662.16	0		0.688757	0.92938	0.131814	0.953151	1.00184	0.0314343	0.0476431	1.23782	2.83161	0.0706407	0.674755	0.314036
16607	Regions/COXKO	13273.7	6662.16	0		0.852454	1.04744	0.175311	1.07476	0.982668	0.0464807	0.0605469	1.06851	3.32573	1.20983	0.654992	0.0224386
16608	Regions/COXKO	13353.7	6662.16	0		0.633059	0.824746	0.0969137	0.850807	1.40204	0.178934	0.166816	1.35678	3.15877	0.581297	0.726928	0.219113
16609	Regions/COXKO	13433.7	6662.16	0		0.678055	0.722596	0.0914778	0.677987	1.66198	0.207115	0.176634	1.56962	3.05155	0.477428	0.897211	0.204596
16610	Regions/COXKO	13513.7	6662.16	0		0.602398	0.67502	0.11069	0.775648	1.40496	0.0181149	0.0174886	1.54807	3.4422	0.571349	0.717669	0.204204
16611	Regions/COXKO	13593.7	6662.16	0		0.730554	0.855393	0.128463	0.594027	1.61621	0.0287328	0.0302339	1.24199	3.18315	0.0509592	0.957346	0.209872
16612	Regions/COXKO	13673.7	6662.16	0		0.805168	1.07738	0.1345	0.992492	1.28153	0.0433764	0.0408022	1.06099	3.01132	0.067882	0.575013	0.307838
16613	Regions/COXKO	13753.7	6662.16	0		0.73678	0.856425	0.110653	0.461987	1.10858	0.0294496	0.0224937	1.58104	3.85128	0.464823	0.874889	0.157384
16614	Regions/COXKO	13833.7	6662.16	0		0.797422	0.829283	0.144657	0.0505798	1.42034	0.0330153	0.0242112	1.32942	2.44658	0.704294	0.617587	0.0099531
16658	Regions/COXKO	13513.7	6582.16	0		0.754553	0.854392	0.121665	1.00906	1.21669	0.0194768	0.0196085	1.4779	3.03682	0.523761	0.765072	0.19878
16659	Regions/COXKO	13593.7	6582.16	0		0.751357	1.56292	0.0136153	1.07476	1.036	1.08278	1.08419	0.658919	3.34034	1.20983	0.789047	0.0379045
16660	Regions/COXKO	13673.7	6582.16	0		0.833754	1.00674	0.165114	12.4916	1.31881	0.224712	0.296703	1.17318	2.52995	1.20983	0.555153	0.129867
16661	Regions/COXKO	13753.7	6582.16	0		0.853478	1.20832	0.150842	1.06455	1.44778	0.272303	0.410174	1.00881	3.19329	0.097878	0.443103	0.161076
16662	Regions/COXKO	13833.7	6582.16	0		0.949683	1.14584	0.027653	0.0413883	1.05911	1.08278	1.08419	0.821996	21.2301	0.0465901	0.0448935	0.0372891
322	Regions/WT	4913.7	15662.2	0		0.94661	1.47748	0.321769	1.07476	1.05911	1.08278	1.08419	0.702875	2.30818	1.20983	0.788314	0.654784
323	Regions/WT	4993.7	15662.2	0		0.94661	1.47748	0.321769	1.07476	1.05911	1.08278	1.08419	0.702875	2.30818	1.20983	0.788314	0.654784
361	Regions/WT	4353.7	15582.2	0		1.02744	1.18453	0.156654	0.0491718	0.688359	0.636658	11.4154	0.905503	2.14226	0.0553519	0.724616	0.0179682
362	Regions/WT	4433.7	15582.2	0		1.15067	1.27193	0.161569	0.443019	0.815439	0.365779	0.607056	1.02394	2.66312	0.0373472	0.80899	0.141929
363	Regions/WT	4513.7	15582.2	0		0.986358	1.08646	0.141792	0.716768	0.808071	0.278501	0.374366	0.902519	2.37791	0.398192	0.512531	0.102783
364	Regions/WT	4593.7	15582.2	0		1.00767	0.956979	0.169106	0.644449	0.740528	0.258224	0.394525	1.05281	2.7982	0.055515	0.902368	0.174286
365	Regions/WT	4673.7	15582.2	0		1.207	1.05935	0.108175	0.589811	0.801351	0.24845	0.429011	1.1638	2.62431	0.358182	0.885046	0.181329
366	Regions/WT	4753.7	15582.2	0		1.2424	0.898495	0.139022	0.54431	0.979306	0.279832	0.38841	1.17009	3.0549	0.340033	1.02884	0.148589
367	Regions/WT	4833.7	15582.2	0		1.29036	0.157787	0.321769	1.07476	1.05911	1.08278	1.08419	6.58153	35.1399	1.20983	0.788314	0.654784
368	Regions/WT	4913.7	15582.2	0		1.24399	1.01248	0.146232	0.68354	0.868472	0.250795	0.302895	1.00784	2.40163	0.431837	0.469261	0.108982
369	Regions/WT	4993.7	15582.2	0		0.94661	1.47748	0.321769	1.07476	1.05911	0.0555534	1.08419	0.702875	2.30818	1.20983	0.788314	0.654784
370	Regions/WT	5073.7	15582.2	0		1.08917	1.88655	0.226227	1.07476	0.906126	0.0935495	1.08419	0.678041	1.96954	1.20983	0.481634	0.0263975
409	Regions/WT	4353.7	15502.2	0		0.94661	10.1153	0.321769	1.07476	1.05911	1.08278	1.08419	0.702875	2.30818	1.20983	0.788314	0.654784
410	Regions/WT	4433.7	15502.2	0		1.05183	0.974101	0.195915	0.456669	0.793858	0.322175	0.465927	1.131	2.53122	0.0440415	0.649404	0.0987245
411	Regions/WT	4513.7	15502.2	0		1.23382	1.0266	0.124494	0.552261	0.872086	0.299407	0.525594	0.968289	2.59432	0.0424311	0.599955	0.0939195
412	Regions/WT	4593.7	15502.2	0		1.05	0.914287	0.167609	0.553579	0.945445	0.241253	0.40231	1.16328	2.86616	0.0357327	0.815733	0.138107
413	Regions/WT	4673.7	15502.2	0		1.01108	0.818695	0.132596	1.07982	0.802634	0.0213462	0.028807	1.17772	2.25769	0.0622594	0.959208	0.213164
414	Regions/WT	4753.7	15502.2	0		1.19037	0.931505	0.151236	0.634572	0.92801	0.321878	0.372982	1.13776	2.68281	0.037948	0.676991	0.144826
415	Regions/WT	4833.7	15502.2	0		1.2136	0.962068	0.122035	0.590866	0.726603	0.380372	0.495246	1.10556	2.63146	0.435526	0.686803	0.129739
416	Regions/WT	4913.7	15502.2	0		1.24497	1.07173	0.192231	1.11613	0.852099	0.234744	0.394598	1.14172	2.25361	0.0698189	0.627745	0.185248
417	Regions/WT	4993.7	15502.2	0		0.94661	1.47748	0.321769	1.07476	1.05911	1.08278	1.08419	0.702875	2.30818	1.20983	0.788314	0.654784
418	Regions/WT	5073.7	15502.2	0		1.20584	1.32982	0.174273	0.555809	0.834262	0.295984	0.506448	0.850082	2.61309	0.0703544	0.48532	0.107772
419	Regions/WT	5153.7	15502.2	0		0.606314	3.04034	0.206616	1.07476	1.05911	1.08278	1.08419	0.448962	1.17713	1.20983	0.0647834	0.05381
462	Regions/WT	4353.7	15422.2	0		0.94661	1.47748	0.321769	1.07476	1.05911	1.08278	1.08419	0.702875	2.30818	1.20983	0.788314	0.654784
463	Regions/WT	4433.7	15422.2	0		0.94661	1.47748	0.321769	1.07476	1.05911	1.08278	1.08419	0.702875	2.30818	1.20983	0.788314	0.654784
464	Regions/WT	4513.7	15422.2	0		1.1862	1.1658	0.168541	0.488037	0.990961	0.439761	0.699287	0.943014	2.38104	0.042229	0.5355	0.0877103
465	Regions/WT	4593.7	15422.2	0		1.10366	0.774096	0.144666	0.434072	0.913857	0.0111674	0.0217456	1.6405	3.11816	0.291436	1.20111	0.10398
466	Regions/WT	4673.7	15422.2	0		1.07035	0.836685	0.161606	0.726967	1.02536	0.215687	0.2828	1.32292	2.90737	0.0455403	0.998761	0.168127
467	Regions/WT	4753.7	15422.2	0		1.19993	0.821778	0.158924	0.887037	0.745868	0.298655	0.339149	1.24158	2.74962	0.041497	1.05681	0.265893
468	Regions/WT	4833.7	15422.2	0		1.08039	1.0589	0.105826	0.842305	0.839964	0.0246995	0.0263692	1.03187	2.84198	0.413305	0.921904	0.182267
469	Regions/WT	4913.7	15422.2	0		1.18836	1.16184	0.182402	0.417427	0.932304	0.385737	0.465881	0.931851	2.4258	0.334974	0.618497	0.0924288
470	Regions/WT	4993.7	15422.2	0		1.31832	1.01708	0.0993381	0.92376	0.81093	1.08278	1.08419	1.34665	4.13312	0.109254	0.746138	0.0904088
471	Regions/WT	5073.7	15422.2	0		1.20769	0.883152	0.114007	0.477472	0.698711	0.0193409	0.0325921	1.20293	3.6046	0.0591759	0.813123	0.0816595
472	Regions/WT	5153.7	15422.2	0		1.05424	1.50584	0.0148844	1.07476	1.13749	0.0865526	1.08419	0.787353	2.5524	1.20983	0.447021	0.0292859
473	Regions/WT	5233.7	15422.2	0		1.05906	1.1065	0.181978	0.0727042	0.837133	0.0767912	0.0683562	1.00115	1.86561	0.0818418	0.837804	0.0265781
474	Regions/WT	5313.7	15422.2	0		0.976364	1.6745	0.173111	0.0756555	0.535423	0.062837	0.0785774	0.665942	2.05009	0.0851641	0.526488	0.0228958
520	Regions/WT	4353.7	15342.2	0		0.94661	1.47748	0.321769	1.07476	1.05911	1.08278	1.08419	0.702875	2.30818	1.20983	0.788314	0.654784
521	Regions/WT	4433.7	15342.2	0		0.0257205	1.54096	0.0187553	1.07476	18.6736	1.08278	1.08419	0.821066	0.95577	1.20983	0.0531766	0.0441692
522	Regions/WT	4513.7	15342.2	0		0.94661	1.47748	0.0378025	1.07476	1.05911	1.08278	1.08419	0.0825761	2.30818	1.20983	0.788314	0.654784
523	Regions/WT	4593.7	15342.2	0		1.20149	0.915291	0.113544	0.502781	0.860297	0.237213	0.541674	1.26331	3.01431	0.374129	0.825798	0.12173
524	Regions/WT	4673.7	15342.2	0		1.07395	0.880221	0.111518	0.868812	0.823656	0.23461	0.418212	0.955044	3.36052	0.0506743	1.21335	0.250073
525	Regions/WT	4753.7	15342.2	0		1.06831	0.874611	0.155509	0.89476	0.92467	0.0174776	0.0221416	1.15229	3.1809	0.570149	1.24617	0.224051
526	Regions/WT	4833.7	15342.2	0		1.21225	0.980319	0.139448	0.527622	1.10147	0.239976	0.279782	1.10056	2.51527	0.319237	0.646997	0.124406
527	Regions/WT	4913.7	15342.2	0		1.17805	0.962843	0.149086	0.354771	0.995042	0.021949	0.0260203	1.16633	3.2596	0.327315	0.597198	0.0620441
528	Regions/WT	4993.7	15342.2	0		1.0503	0.896837	0.142283	0.053463	0.921886	0.708816	0.856821	1.15487	2.37023	0.0601823	0.830089	0.0156594
529	Regions/WT	5073.7	15342.2	0		0.964005	0.929229	0.141744	0.918594	0.783527	0.204355	0.294484	1.21087	2.95593	0.483602	0.701474	0.13416
530	Regions/WT	5153.7	15342.2	0		1.13774	0.951486	0.111425	0.498836	1.00333	0.194299	0.267101	1.41998	4.22338	0.0803822	0.563283	0.0651997
531	Regions/WT	5233.7	15342.2	0		1.16584	1.10442	0.194478	0.56394	0.702097	0.0473304	0.10273	0.987469	2.16855	0.0739924	0.756871	0.148677
532	Regions/WT	5313.7	15342.2	0		0.94661	11.5512	6.72494	1.07476	1.05911	1.08278	1.08419	0.702875	2.30818	1.20983	0.788314	0.654784
533	Regions/WT	5393.7	15342.2	0		0.94661	1.47748	0.321769	1.07476	1.05911	1.08278	1.08419	0.702875	2.30818	1.20983	0.788314	0.654784
582	Regions/WT	4273.7	15262.2	0		1.12079	1.59233	0.180075	0.63523	0.718323	0.0449555	1.08419	0.618005	1.59157	0.0565034	0.501304	0.247056
583	Regions/WT	4353.7	15262.2	0		0.94661	1.47748	0.321769	1.07476	1.05911	1.08278	1.08419	0.702875	2.30818	1.20983	0.788314	0.654784
584	Regions/WT	4433.7	15262.2	0		1.34242	1.92371	0.220868	0.0612755	0.752825	0.348626	0.724065	0.645803	1.82082	0.0689767	0.485289	0.0205651
585	Regions/WT	4513.7	15262.2	0		0.94661	1.47748	0.321769	1.07476	1.05911	1.08278	1.08419	0.702875	2.30818	1.20983	0.788314	0.654784
586	Regions/WT	4593.7	15262.2	0		1.14133	0.997986	0.158093	0.728794	0.954353	0.265294	0.357095	1.08128	2.62703	0.457706	0.547023	0.120875
587	Regions/WT	4673.7	15262.2	0		1.18869	0.81119	0.155945	0.678794	0.87276	0.265449	0.396205	1.41475	2.91995	0.270609	1.10294	0.248224
588	Regions/WT	4753.7	15262.2	0		1.19958	0.814982	0.181917	0.643451	0.878743	0.227724	0.324113	1.2348	2.89097	0.0446719	0.946928	0.14663
589	Regions/WT	4833.7	15262.2	0		0.952459	0.78109	0.147858	0.73871	0.879112	0.0256693	0.0236252	1.27797	2.52628	0.0468172	0.808579	0.172943
590	Regions/WT	4913.7	15262.2	0		0.852991	0.909218	0.141371	0.56937	1.17232	0.233128	0.363862	1.17175	2.87266	0.333988	0.732583	0.125913
591	Regions/WT	4993.7	15262.2	0		0.914234	0.944894	0.215714	0.0628233	0.56669	0.0373224	0.0783513	1.0237	2.50739	0.0707191	0.4825	0.0137054
592	Regions/WT	5073.7	15262.2	0		0.94661	1.47748	0.321769	1.07476	1.05911	1.08278	1.08419	0.702875	2.30818	1.20983	0.788314	0.654784
593	Regions/WT	5153.7	15262.2	0		1.1467	0.921096	0.106938	0.492814	0.946266	0.261555	0.313559	1.30631	3.40331	0.358205	0.658607	0.0780863
594	Regions/WT	5233.7	15262.2	0		1.22877	0.990379	0.150367	0.814767	0.935478	0.499017	0.379637	0.891908	1.91158	0.0609173	0.465021	0.149665
595	Regions/WT	5313.7	15262.2	0		0.907471	0.806589	0.114105	0.559755	0.880764	0.232434	0.322668	1.34335	2.5738	0.404141	0.69526	0.107398
596	Regions/WT	5393.7	15262.2	0		1.05705	0.824628	0.121291	0.495824	0.838676	0.247648	0.341267	1.18273	2.54618	0.393951	0.679908	0.099558
597	Regions/WT	5473.7	15262.2	0		1.04588	1.032	0.131838	0.44729	0.86203	0.257528	0.387307	1.05027	2.63798	0.0413427	0.722103	0.089718
598	Regions/WT	5553.7	15262.2	0		1.03858	0.970806	0.131192	0.50282	0.758791	0.344544	0.542	1.04332	2.55887	0.0334771	0.933451	0.143794
624	Regions/WT	2193.7	15182.2	0		0.584308	1.03072	0.112978	0.541272	0.860139	0.243519	0.402708	0.873682	1.9289	0.271494	0.569285	0.136962
625	Regions/WT	2273.7	15182.2	0		0.965995	1.00405	0.127821	0.5897	0.923274	0.417559	0.572534	0.918786	1.71781	0.293375	0.353522	0.0849504
626	Regions/WT	2353.7	15182.2	0		0.89428	0.999784	0.10833	0.468238	0.823579	0.0152233	0.022301	0.981563	2.27478	0.312739	0.529006	0.0900302
627	Regions/WT	2433.7	15182.2	0		1.15658	1.55669	0.156991	0.846082	0.803843	0.364662	0.712026	0.702035	1.90568	0.0600088	0.381725	0.11608
628	Regions/WT	2513.7	15182.2	0		1.39743	1.68431	0.13526	0.832316	0.620637	0.0304326	0.0563182	0.719826	2.11674	0.0852124	0.407706	0.103713
629	Regions/WT	2593.7	15182.2	0		0.870367	1.37235	0.156088	1.07476	0.786175	1.08278	1.08419	0.802935	2.08286	1.20983	0.921816	0.0398849
630	Regions/WT	2673.7	15182.2	0		1.1006	1.42749	0.197562	0.654039	0.737772	0.374546	0.679678	0.875173	2.00762	0.055907	0.474295	0.149261
631	Regions/WT	2753.7	15182.2	0		1.25629	1.67465	0.106873	0.739262	0.777777	0.398674	0.58038	0.732373	2.14219	0.467071	0.339355	0.111475
648	Regions/WT	4113.7	15182.2	0		0.94661	1.47748	0.321769	1.07476	1.05911	1.08278	1.08419	0.702875	2.30818	1.20983	0.788314	0.654784
649	Regions/WT	4193.7	15182.2	0		0.94661	1.47748	0.321769	1.07476	1.05911	1.08278	1.08419	0.702875	2.30818	1.20983	0.788314	0.654784
650	Regions/WT	4273.7	15182.2	0		0.94661	15.0101	0.0335373	1.07476	1.05911	1.08278	1.08419	0.0732591	2.30818	1.20983	0.0463442	0.0384941
651	Regions/WT	4353.7	15182.2	0		0.94661	1.47748	8.4075	1.07476	1.05911	1.08278	1.08419	0.702875	2.30818	1.20983	0.788314	0.654784
652	Regions/WT	4433.7	15182.2	0		0.94661	1.47748	0.321769	1.07476	1.05911	1.08278	1.08419	0.702875	2.30818	1.20983	0.788314	0.654784
653	Regions/WT	4513.7	15182.2	0		0.94661	1.47748	0.321769	1.07476	1.05911	1.08278	1.08419	0.702875	2.30818	1.20983	0.788314	0.654784
654	Regions/WT	4593.7	15182.2	0		1.0818	1.01877	0.160159	0.5144	0.967396	0.277812	0.39604	1.10021	2.49113	0.352545	0.568506	0.111603
655	Regions/WT	4673.7	15182.2	0		0.983528	0.797606	0.162617	0.517893	0.856229	0.294143	0.349528	1.27461	2.51549	0.0299324	0.859959	0.150381
656	Regions/WT	4753.7	15182.2	0		0.865116	0.862833	0.136246	0.501888	1.10687	0.264316	0.400494	1.09673	2.42615	0.342191	0.933914	0.154392
657	Regions/WT	4833.7	15182.2	0		0.848337	0.754433	0.157677	0.787774	1.09562	0.201235	0.300115	1.21065	2.78109	0.369693	0.880569	0.202534
658	Regions/WT	4913.7	15182.2	0		0.965546	0.782	0.147383	0.393564	0.904056	0.203532	0.314996	1.19358	2.57428	0.0336916	0.63576	0.0963101
659	Regions/WT	4993.7	15182.2	0		1.11621	0.860891	0.0995128	0.641094	0.731836	0.0246568	0.0268267	1.3161	3.62246	0.0743838	47.7269	6.35269
660	Regions/WT	5073.7	15182.2	0		1.03831	1.09345	0.146081	0.54531	0.982949	0.335884	0.444214	1.02179	2.23736	0.47801	0.519958	0.0899655
661	Regions/WT	5153.7	15182.2	0		1.07237	1.10584	0.120266	0.532166	0.8659	0.28804	0.396871	1.00041	2.20691	0.260483	0.513869	0.0831771
662	Regions/WT	5233.7	15182.2	0		1.01765	1.03087	0.132291	0.739604	0.828386	0.296401	0.384069	0.99821	2.04033	0.263608	0.47871	0.130411
663	Regions/WT	5313.7	15182.2	0		1.01611	1.05473	0.177225	0.621565	0.861515	0.246316	0.400047	1.01235	2.34028	0.0441875	0.545995	0.0985697
664	Regions/WT	5393.7	15182.2	0		0.958316	0.833994	0.143771	0.4485	0.98426	0.330715	0.469706	1.11883	2.66918	0.285572	0.852825	0.134566
665	Regions/WT	5473.7	15182.2	0		1.09432	1.14215	0.11741	0.45196	0.859356	0.315715	0.400314	0.943375	2.59104	0.319005	0.587815	0.089891
666	Regions/WT	5553.7	15182.2	0		1.21876	0.94846	0.128563	0.523571	0.820836	0.228271	0.255651	1.14076	2.58552	0.353011	0.725693	0.0940087
667	Regions/WT	5633.7	15182.2	0		1.06749	1.10368	0.177381	0.650345	0.853559	0.278137	0.357046	0.955157	2.63838	0.414733	0.74692	0.13579
693	Regions/WT	2113.7	15102.2	0		0.959246	1.04654	0.158537	0.691936	0.724647	0.465359	0.670061	0.960225	1.98748	0.574454	0.859499	0.157935
694	Regions/WT	2193.7	15102.2	0		0.749831	1.00577	0.137835	0.628742	0.861377	0.286056	0.356864	0.9627	1.95684	0.332631	0.537034	0.138621
695	Regions/WT	2273.7	15102.2	0		0.740563	0.894621	0.160572	0.579954	0.896269	0.304044	0.350302	1.03821	1.91833	0.413422	0.555578	0.122347
696	Regions/WT	2353.7	15102.2	0		0.636855	0.900311	0.13127	0.686832	0.86714	0.270957	0.331396	1.01908	2.12202	0.513081	0.70123	0.20307
697	Regions/WT	2433.7	15102.2	0		1.02398	0.983515	0.138438	0.487711	0.887445	0.331464	0.376132	1.0015	2.01879	0.28309	0.636971	0.115172
698	Regions/WT	2513.7	15102.2	0		1.00265	1.2271	0.135996	0.83073	0.7738	0.357879	0.452717	0.835693	2.03017	0.0572631	0.307527	0.103477
699	Regions/WT	2593.7	15102.2	0		1.42954	1.46034	0.187845	0.561499	0.706668	0.471094	0.668032	0.760039	2.17693	0.0553544	0.603385	0.164214
700	Regions/WT	2673.7	15102.2	0		1.49358	1.57647	0.14662	1.35738	0.701365	0.449639	0.693761	0.698033	2.26769	0.134808	0.497392	0.148686
701	Regions/WT	2753.7	15102.2	0		0.847412	1.56245	0.260636	1.07476	0.737296	1.08278	1.08419	0.66133	1.77124	1.20983	0.411099	0.0272265
702	Regions/WT	2833.7	15102.2	0		0.94661	0.136396	0.321769	1.07476	1.05911	1.08278	1.08419	7.61374	2.30818	1.20983	0.788314	0.654784
703	Regions/WT	2913.7	15102.2	0		1.03366	1.45188	0.0108308	1.07476	15.0537	1.08278	1.08419	0.689635	1.11829	1.20983	0.475099	0.0223646
716	Regions/WT	3953.7	15102.2	0		0.94661	1.47748	0.321769	1.07476	1.05911	1.08278	1.08419	0.702875	2.30818	1.20983	0.788314	0.654784
717	Regions/WT	4033.7	15102.2	0		0.94661	1.47748	0.321769	1.07476	1.05911	1.08278	1.08419	0.702875	2.30818	1.20983	0.788314	0.654784
718	Regions/WT	4113.7	15102.2	0		0.94661	1.47748	0.321769	1.07476	1.05911	1.08278	1.08419	0.702875	2.30818	1.20983	0.788314	0.654784
719	Regions/WT	4193.7	15102.2	0		0.94661	1.47748	0.321769	1.07476	1.05911	1.08278	1.08419	0.702875	2.30818	1.20983	0.788314	0.654784
720	Regions/WT	4273.7	15102.2	0		0.868197	1.8976	0.198791	0.0649037	0.431429	0.0402512	0.0727636	0.507817	2.27022	0.073061	0.300181	0.0121054
721	Regions/WT	4353.7	15102.2	0		0.94661	1.47748	0.321769	1.07476	1.05911	1.08278	1.08419	0.702875	2.30818	1.20983	0.788314	0.654784
722	Regions/WT	4433.7	15102.2	0		0.94661	1.47748	0.321769	1.07476	1.05911	1.08278	1.08419	0.702875	2.30818	1.20983	0.788314	0.654784
723	Regions/WT	4513.7	15102.2	0		1.08054	1.28762	0.216298	0.0404802	0.767518	0.0416704	0.0515125	0.889972	2.15053	0.0455679	0.90595	0.0170199
724	Regions/WT	4593.7	15102.2	0		1.01575	0.786045	0.183705	0.874791	0.809032	0.274257	0.261533	1.32295	2.53267	0.0426998	0.855487	0.184406
725	Regions/WT	4673.7	15102.2	0		1.01739	0.761954	0.169761	0.767029	0.926673	0.0200828	0.023132	1.17536	2.48113	0.0379624	0.804755	0.209452
726	Regions/WT	4753.7	15102.2	0		0.848401	0.869529	0.131869	0.969726	1.08848	0.287613	0.459707	1.06034	2.44392	0.501581	0.693403	0.173277
727	Regions/WT	4833.7	15102.2	0		0.859345	0.745499	0.139404	0.786917	0.972329	0.282659	0.380207	1.13787	2.43526	0.0433962	1.05521	0.228899
728	Regions/WT	4913.7	15102.2	0		0.836247	0.72716	0.115168	0.394504	1.09819	0.263572	0.424648	1.1257	2.71607	0.430578	0.733479	0.101399
729	Regions/WT	4993.7	15102.2	0		0.926475	0.996139	0.0141085	1.07476	1.05911	1.08278	1.08419	0.816288	1.45894	1.20983	0.367409	0.0188759
730	Regions/WT	5073.7	15102.2	0		1.08693	1.05421	0.150098	0.601357	0.740466	0.364201	0.472654	1.04047	2.18497	0.242942	0.53581	0.115492
731	Regions/WT	5153.7	15102.2	0		1.04215	1.27011	0.171811	0.631822	0.726662	0.378481	0.523746	0.777054	1.57608	0.0367209	0.347785	0.102546
732	Regions/WT	5233.7	15102.2	0		1.0005	0.880157	0.0861874	0.550633	0.808505	0.0169103	0.0221362	1.15201	2.53873	0.287647	0.516483	0.0775824
733	Regions/WT	5313.7	15102.2	0		0.95658	1.12035	0.125931	0.786887	0.920022	0.27159	0.386364	0.879011	1.83366	0.372992	0.554914	0.130018
734	Regions/WT	5393.7	15102.2	0		0.767016	1.08791	0.116448	0.809472	0.547851	0.0343691	0.0504443	0.776088	2.02878	0.477103	1.25928	0.271086
735	Regions/WT	5473.7	15102.2	0		0.850135	1.25961	0.189065	0.0644488	0.703865	0.445062	0.526074	0.814197	1.69313	0.0725489	0.732095	0.017354
736	Regions/WT	5553.7	15102.2	0		0.851066	1.23698	0.148362	1.10559	0.790222	0.0558261	0.0988837	0.780724	2.60054	0.0966718	0.530299	0.23098
737	Regions/WT	5633.7	15102.2	0		0.979823	1.20531	0.157741	0.732027	0.829444	0.024597	0.0417784	0.927025	2.32061	0.488036	0.558124	0.140057
738	Regions/WT	5713.7	15102.2	0		0.959817	1.16287	0.149754	0.568777	0.806319	0.343113	0.613691	0.888295	2.47138	0.0521398	0.617184	0.110229
764	Regions/WT	2033.7	15022.2	0		0.858262	1.09109	0.176957	0.670309	0.849398	0.371408	0.693059	0.873758	2.25974	0.039692	0.734478	0.209504
765	Regions/WT	2113.7	15022.2	0		1.01445	1.16987	0.142559	0.340308	0.933424	0.260475	0.406204	0.786571	1.9877	0.333749	0.654717	0.106546
766	Regions/WT	2193.7	15022.2	0		0.809608	1.06785	0.178961	0.596653	0.912443	0.320169	0.457929	0.913584	2.0057	0.37972	0.642411	0.16492
767	Regions/WT	2273.7	15022.2	0		0.615732	0.956775	0.115564	0.521401	0.801207	0.0127533	0.0151175	0.956294	1.69107	0.388695	0.535662	0.100311
768	Regions/WT	2353.7	15022.2	0		1.09786	1.24646	0.143824	0.478015	0.672427	0.35079	0.687025	0.929246	2.05696	0.325889	0.363352	0.0729321
769	Regions/WT	2433.7	15022.2	0		1.01449	1.05513	0.112399	0.636483	0.784157	0.341595	0.455647	0.981382	1.84901	0.363485	0.410958	0.104103
770	Regions/WT	2513.7	15022.2	0		0.923865	1.17781	0.16885	0.798956	0.601308	0.0422067	0.0786807	0.88746	2.09028	0.0736428	0.75065	0.227103
771	Regions/WT	2593.7	15022.2	0		1.26897	1.24788	0.15735	0.652505	0.72206	0.418661	0.83615	0.925471	2.49318	0.390644	0.475942	0.142821
772	Regions/WT	2673.7	15022.2	0		0.94661	1.47748	0.321769	1.07476	1.05911	1.08278	1.08419	0.702875	2.30818	1.20983	0.788314	0.654784
773	Regions/WT	2753.7	15022.2	0		1.23399	1.88858	0.181294	0.6414	0.857129	0.0512073	0.0864769	0.721102	1.90996	0.101529	0.346733	0.097625
774	Regions/WT	2833.7	15022.2	0		1.20275	1.17645	0.152574	0.618465	0.637823	0.566953	0.862981	0.898103	2.03819	0.0463967	0.590232	0.144589
775	Regions/WT	2913.7	15022.2	0		1.18884	1.54241	0.193724	0.539971	0.769071	0.0592752	0.0829908	0.736618	2.01166	0.0601696	0.529588	0.168549
776	Regions/WT	2993.7	15022.2	0		1.22814	1.78591	0.199885	0.596973	0.669088	0.572728	1.0191	0.683812	2.08021	0.0763053	0.407967	0.108617
786	Regions/WT	3793.7	15022.2	0		0.780146	1.47114	0.20487	1.07476	0.701796	0.0406335	0.0518774	0.762525	1.8203	1.20983	0.414084	0.0135035
787	Regions/WT	3873.7	15022.2	0		1.04002	1.34949	0.184797	0.453161	0.811101	0.334527	0.428834	0.738805	2.01754	0.421929	0.329814	0.0653607
788	Regions/WT	3953.7	15022.2	0		1.00603	1.54637	0.222025	0.0580933	1.05911	1.08278	1.08419	0.480477	1.86185	0.0653946	0.028826	0.0239433
789	Regions/WT	4033.7	15022.2	0		0.94661	1.47748	0.321769	1.07476	1.05911	1.08278	1.08419	0.702875	2.30818	1.20983	0.0457697	0.038017
790	Regions/WT	4113.7	15022.2	0		0.94661	1.47748	0.321769	1.07476	1.05911	1.08278	1.08419	0.702875	2.30818	1.20983	0.788314	0.654784
791	Regions/WT	4193.7	15022.2	0		1.12269	1.92988	0.177517	0.976105	0.709252	0.403845	0.579796	0.50623	2.03947	0.087062	0.32811	0.144029
792	Regions/WT	4273.7	15022.2	0		1.16759	1.23765	0.147688	0.702362	0.623113	0.314462	0.392651	0.902106	2.20538	0.357914	0.415654	0.0859227
793	Regions/WT	4353.7	15022.2	0		0.926768	0.953787	0.168575	1.07476	0.598465	0.0905385	0.0770925	1.09689	1.99308	1.20983	0.922193	0.0355247
794	Regions/WT	4433.7	15022.2	0		0.0504285	1.77226	0.0414954	1.07476	1.05911	1.08278	1.08419	0.861678	21.3092	1.20983	0.0301265	0.0250235
795	Regions/WT	4513.7	15022.2	0		1.00035	0.964899	0.132933	0.40599	0.895076	0.231878	0.31113	1.06717	2.35974	0.423004	0.713689	0.0891827
796	Regions/WT	4593.7	15022.2	0		0.761253	0.760404	0.116458	0.71143	1.05546	0.182562	0.255815	1.18947	2.33534	0.282629	0.809	0.178588
797	Regions/WT	4673.7	15022.2	0		0.868597	0.830286	0.137605	0.825708	0.994838	0.231156	0.264894	1.17665	2.41957	0.399008	0.649227	0.138335
798	Regions/WT	4753.7	15022.2	0		0.968835	0.774031	0.134109	0.618105	0.890223	0.260909	0.336548	1.25075	2.55108	0.277348	0.681997	0.160867
799	Regions/WT	4833.7	15022.2	0		0.837439	1.01872	0.163649	0.647749	1.10692	0.354106	0.49098	1.00381	2.64769	0.0412323	0.513265	0.132875
800	Regions/WT	4913.7	15022.2	0		0.869123	0.75119	0.134624	0.523721	0.827781	0.2984	0.39646	1.28676	2.43095	0.467508	0.76849	0.148527
801	Regions/WT	4993.7	15022.2	0		0.950177	1.34211	0.172196	1.08866	0.98125	0.361138	0.483047	0.780918	2.0319	0.057744	0.472835	0.182524
802	Regions/WT	5073.7	15022.2	0		0.855907	1.10171	0.146568	0.565819	0.743171	0.406849	0.631146	0.973061	1.79208	0.363452	0.514654	0.113406
803	Regions/WT	5153.7	15022.2	0		0.849807	1.28228	0.127721	0.697628	0.786739	0.250365	0.391348	0.732629	1.8801	0.033419	0.448528	0.147918
804	Regions/WT	5233.7	15022.2	0		0.814835	1.17738	0.139614	0.760289	0.832435	0.278084	0.402827	0.927577	1.98459	0.273266	0.429432	0.104429
805	Regions/WT	5313.7	15022.2	0		0.891918	1.07827	0.185945	0.501669	0.982723	0.474336	0.543142	1.03191	2.19162	0.043021	0.616162	0.124549
806	Regions/WT	5393.7	15022.2	0		0.939476	0.838837	0.131214	0.556044	0.756216	0.347384	0.38249	1.14762	2.31729	0.0479073	0.954417	0.171297
807	Regions/WT	5473.7	15022.2	0		0.9581	1.1602	0.192849	0.762537	0.837984	0.0323709	0.0676355	0.923982	1.93145	0.0523856	0.520036	0.169548
808	Regions/WT	5553.7	15022.2	0		0.754831	1.01404	0.16695	0.526539	0.851132	0.252764	0.413515	0.993689	2.21176	0.0473707	0.592138	0.100597
809	Regions/WT	5633.7	15022.2	0		0.905088	1.04809	0.149667	0.838564	0.965714	0.260511	0.38929	1.00856	2.31445	0.352021	0.616898	0.192526
810	Regions/WT	5713.7	15022.2	0		0.99086	1.13255	0.177134	0.660821	0.722715	0.310498	0.443733	1.05817	2.79534	0.0521572	0.693439	0.119144
811	Regions/WT	5793.7	15022.2	0		1.58664	1.05217	0.131027	0.611811	0.955543	0.217934	0.279214	1.07334	3.65697	0.0848628	0.360052	0.0440416
836	Regions/WT	2033.7	14942.2	0		0.944009	1.15741	0.171277	0.661779	0.885095	0.352162	0.511087	0.921863	2.05241	0.037351	0.749674	0.223318
837	Regions/WT	2113.7	14942.2	0		0.991752	1.03187	0.138173	0.579778	0.7155	0.354225	0.514984	0.955731	2.36607	0.433007	0.551207	0.111875
838	Regions/WT	2193.7	14942.2	0		0.897897	1.11185	0.145327	0.879901	0.730433	0.341228	0.56194	0.90356	2.19153	0.0417249	0.566223	0.159287
839	Regions/WT	2273.7	14942.2	0		0.684726	0.821843	0.13197	0.410409	0.963583	0.356548	0.574367	1.0267	1.88287	0.469438	0.666275	0.130797
840	Regions/WT	2353.7	14942.2	0		0.806456	0.942457	0.0964684	0.333895	0.842146	0.0156553	0.0148036	1.0632	1.79474	0.221549	0.341848	0.0503611
841	Regions/WT	2433.7	14942.2	0		0.938844	1.12244	0.166417	0.814399	0.927927	0.351284	0.380927	0.933432	1.87483	0.0401133	0.381188	0.131542
842	Regions/WT	2513.7	14942.2	0		1.18609	1.26289	0.157901	0.563744	0.691931	0.308979	0.619038	0.843105	1.73055	0.0474069	0.577215	0.17594
843	Regions/WT	2593.7	14942.2	0		1.16712	2.12709	0.188303	1.31176	0.830574	0.601782	1.08726	0.575099	1.71899	0.104312	0.399037	0.234035
844	Regions/WT	2673.7	14942.2	0		0.765	1.21003	0.269649	1.07476	0.0464171	0.0806301	1.08419	0.816485	1.09818	1.20983	0.0277066	0.0230135
845	Regions/WT	2753.7	14942.2	0		1.23388	1.60209	0.21202	0.0585445	0.713091	1.04609	0.974048	0.665254	2.06839	0.0659025	0.233997	0.0147726
846	Regions/WT	2833.7	14942.2	0		0.94661	1.47748	0.321769	1.07476	1.05911	1.08278	1.08419	0.702875	2.30818	1.20983	0.788314	0.654784
847	Regions/WT	2913.7	14942.2	0		0.94661	1.47748	0.321769	1.07476	1.05911	1.08278	1.08419	0.702875	2.30818	1.20983	0.788314	0.654784
848	Regions/WT	2993.7	14942.2	0		1.11532	1.60196	0.167928	1.20487	0.669292	0.283226	0.522353	0.696744	2.10159	0.127023	0.3345	0.139333
849	Regions/WT	3073.7	14942.2	0		0.94661	1.47748	0.321769	1.07476	1.05911	1.08278	1.08419	0.702875	2.30818	1.20983	0.788314	0.654784
856	Regions/WT	3633.7	14942.2	0		0.73709	1.01113	0.148975	0.794187	0.809273	0.491109	0.693558	0.924546	2.00019	0.0600875	0.885297	0.193431
857	Regions/WT	3713.7	14942.2	0		1.145	1.21303	0.10904	0.634992	0.662496	0.0204979	0.0290349	0.855951	2.28972	0.46194	0.408861	0.0757278
858	Regions/WT	3793.7	14942.2	0		0.736918	0.917626	0.0915279	0.484842	0.69358	0.018279	0.0191563	1.03691	2.32698	0.27876	0.598462	0.0874782
859	Regions/WT	3873.7	14942.2	0		0.698733	0.91554	0.180755	0.493763	0.812802	0.275936	0.407074	1.08909	1.73496	0.039015	0.73443	0.163877
860	Regions/WT	3953.7	14942.2	0		0.814922	0.955193	0.116801	0.377779	0.668476	0.279999	0.328614	1.02945	1.99851	0.366311	0.597442	0.0869328
861	Regions/WT	4033.7	14942.2	0		0.94661	1.47748	0.321769	1.07476	1.05911	1.08278	1.08419	0.702875	2.30818	1.20983	0.788314	0.654784
862	Regions/WT	4113.7	14942.2	0		0.935111	1.48828	0.136654	0.455505	0.816507	0.334506	0.417444	0.74391	2.00632	0.0468077	0.469528	0.0778246
863	Regions/WT	4193.7	14942.2	0		0.804617	1.1738	0.119704	0.507961	0.901424	0.202167	0.288225	0.853498	1.82379	0.476743	0.57333	0.106248
864	Regions/WT	4273.7	14942.2	0		0.674685	1.01402	0.116768	0.616457	0.758651	0.260726	0.305486	0.949687	2.23025	0.325776	0.536519	0.129792
865	Regions/WT	4353.7	14942.2	0		0.793816	1.06474	0.184873	0.715947	0.725086	0.0293372	0.0470935	0.849125	2.13367	0.0386959	0.614239	0.225316
866	Regions/WT	4433.7	14942.2	0		1.0138	1.01051	0.15323	0.370632	0.742569	0.264519	0.313695	1.05032	2.32394	0.0275294	0.666362	0.118455
867	Regions/WT	4513.7	14942.2	0		0.772155	0.841998	0.120305	0.659484	0.962056	0.187543	0.252468	1.05992	2.33165	0.321999	0.645836	0.147595
868	Regions/WT	4593.7	14942.2	0		0.827735	0.895439	0.121607	0.457193	0.820962	0.230713	0.235302	1.14396	2.24106	0.431742	0.555257	0.089736
869	Regions/WT	4673.7	14942.2	0		1.16773	0.802106	0.108682	0.541188	0.793861	0.272745	0.284071	1.2755	2.69905	0.329089	0.557617	0.0887104
870	Regions/WT	4753.7	14942.2	0		0.914873	0.750305	0.133234	0.502882	0.939304	0.295232	0.355054	1.39652	2.49127	0.392082	0.819141	0.115485
871	Regions/WT	4833.7	14942.2	0		0.90188	0.838962	0.176105	0.688371	0.920108	0.339074	0.3792	1.06067	2.19276	0.0459508	0.594562	0.135322
872	Regions/WT	4913.7	14942.2	0		0.815885	0.928723	0.140991	0.618943	0.734968	0.289856	0.405856	1.02305	2.10884	0.371987	0.532714	0.127009
873	Regions/WT	4993.7	14942.2	0		0.706763	1.01031	0.127005	0.539165	0.793394	0.326564	0.551932	0.911011	1.96605	0.444798	0.669019	0.137751
874	Regions/WT	5073.7	14942.2	0		0.808275	1.42038	0.19654	0.045744	0.881387	0.592122	0.938481	0.685243	1.68854	0.0514932	0.319422	0.00894018
875	Regions/WT	5153.7	14942.2	0		0.900127	1.92884	0.20522	0.0594622	0.790232	0.0453238	1.08419	0.58352	2.11336	0.0669356	0.320284	0.016318
876	Regions/WT	5233.7	14942.2	0		0.955055	1.4878	0.184484	0.6725	0.800804	0.345652	0.646653	0.783584	1.78338	0.0459668	0.341135	0.113446
877	Regions/WT	5313.7	14942.2	0		1.07954	1.11022	0.176136	0.753147	0.895577	0.363244	0.6463	0.89385	2.05114	0.0594877	0.546865	0.162263
878	Regions/WT	5393.7	14942.2	0		0.846365	1.45503	0.14471	0.828236	0.728703	0.216648	0.289911	0.813041	2.0024	0.473993	0.537414	0.134035
879	Regions/WT	5473.7	14942.2	0		0.915684	1.9066	0.185834	0.555885	0.742243	0.39249	0.607672	0.672784	1.77061	0.0503007	0.410466	0.127191
880	Regions/WT	5553.7	14942.2	0		0.828809	1.04584	0.155533	0.615708	0.926058	0.351928	0.450071	0.972577	2.05044	0.365584	0.434264	0.0954338
881	Regions/WT	5633.7	14942.2	0		0.926124	1.14768	0.112986	0.828775	1.02657	0.0303704	0.0839719	0.832461	1.95846	0.046401	0.488963	0.194312
882	Regions/WT	5713.7	14942.2	0		0.969131	1.14809	0.144568	0.546426	0.796864	0.24285	0.391755	0.957102	2.64189	0.0523331	0.47202	0.0859164
883	Regions/WT	5793.7	14942.2	0		1.14949	0.929517	0.0926933	0.856233	0.689811	0.0227577	0.0348036	1.12583	3.50812	0.992311	0.720505	0.0679461
909	Regions/WT	2033.7	14862.2	0		1.02551	1.19825	0.155452	0.578852	0.887903	0.423561	0.596797	0.857144	1.99765	0.0487213	0.483173	0.121427
910	Regions/WT	2113.7	14862.2	0		0.92649	1.07557	0.158288	0.629855	0.816391	0.320247	0.603729	0.871612	1.97734	0.382128	0.513596	0.142989
911	Regions/WT	2193.7	14862.2	0		0.922591	0.94984	0.168568	0.471672	0.693268	0.290737	0.416112	0.987977	2.13896	0.290531	0.617148	0.109506
912	Regions/WT	2273.7	14862.2	0		0.857571	0.873261	0.125334	0.366825	0.73247	0.291704	0.380698	1.13978	2.30806	0.333479	0.722893	0.0936486
913	Regions/WT	2353.7	14862.2	0		0.80093	0.87126	0.108963	0.526282	0.734897	0.259998	0.32317	1.00883	1.90756	0.266683	0.514337	0.129686
914	Regions/WT	2433.7	14862.2	0		0.943534	1.09396	0.130711	0.59581	0.851465	0.342609	0.440608	0.983463	2.13708	0.326456	0.429309	0.11456
915	Regions/WT	2513.7	14862.2	0		1.02036	1.60562	0.0139522	1.07476	1.38616	0.912179	16.2306	0.571921	1.42776	1.20983	0.453456	0.0154508
916	Regions/WT	2593.7	14862.2	0		1.12406	1.69819	0.203807	0.678804	0.765702	0.326701	0.854685	0.718234	1.70206	0.0733668	0.372843	0.124163
917	Regions/WT	2673.7	14862.2	0		0.94661	1.47748	0.321769	1.07476	1.05911	1.08278	1.08419	0.702875	2.30818	1.20983	0.788314	0.654784
918	Regions/WT	2753.7	14862.2	0		1.23094	1.65724	0.234293	0.869758	0.812835	0.331859	0.493213	0.655492	1.74438	0.0719628	0.284522	0.113976
919	Regions/WT	2833.7	14862.2	0		0.94661	1.47748	0.321769	1.07476	1.05911	1.08278	1.08419	0.702875	2.30818	1.20983	0.788314	0.654784
920	Regions/WT	2913.7	14862.2	0		1.1689	1.70315	0.18809	0.842087	0.71707	0.291905	0.536905	0.576871	1.87387	0.0596075	0.244686	0.120912
921	Regions/WT	2993.7	14862.2	0		0.94661	1.47748	0.321769	1.07476	1.05911	1.08278	1.08419	0.702875	2.30818	1.20983	0.788314	0.654784
922	Regions/WT	3073.7	14862.2	0		0.94661	1.47748	0.321769	1.07476	1.05911	1.08278	1.08419	0.702875	2.30818	1.20983	0.788314	0.654784
923	Regions/WT	3153.7	14862.2	0		0.94661	1.47748	0.321769	1.07476	1.05911	1.08278	1.08419	0.702875	2.30818	1.20983	0.788314	0.654784
924	Regions/WT	3233.7	14862.2	0		0.94661	1.47748	0.321769	1.07476	1.05911	1.08278	1.08419	0.702875	2.30818	1.20983	0.788314	0.654784
925	Regions/WT	3313.7	14862.2	0		1.03555	0.959366	0.169588	0.364851	0.892767	0.475487	0.59353	1.15088	2.18459	0.29604	0.550686	0.108892
926	Regions/WT	3393.7	14862.2	0		0.949667	1.30592	0.143439	0.450668	0.909104	0.267687	0.344489	0.954545	2.20788	0.288638	0.347849	0.0786225
927	Regions/WT	3473.7	14862.2	0		0.903176	1.22146	0.116892	0.685154	0.710456	0.250686	0.36446	0.955773	2.36202	0.0699047	0.41058	0.0753849
928	Regions/WT	3553.7	14862.2	0		0.990124	1.1902	0.161967	0.618501	0.855942	0.264982	0.392567	0.960398	1.98109	0.349853	0.440706	0.137697
929	Regions/WT	3633.7	14862.2	0		0.970297	1.25609	0.147901	0.431706	0.868678	0.326408	0.399335	0.807233	1.79528	0.339488	0.23111	0.0449139
930	Regions/WT	3713.7	14862.2	0		0.773979	1.03187	0.129064	0.506184	0.827969	0.233814	0.311407	0.933389	1.92354	0.438231	0.444248	0.0884229
931	Regions/WT	3793.7	14862.2	0		0.703109	0.918142	0.12708	0.838949	0.889941	0.240648	0.373877	0.985661	2.01072	0.30953	0.494431	0.144763
932	Regions/WT	3873.7	14862.2	0		0.814817	1.09546	0.141248	0.581718	0.900643	0.245226	0.301683	1.00736	2.24616	0.256697	0.527627	0.129331
933	Regions/WT	3953.7	14862.2	0		0.761694	0.848379	0.156104	0.577721	0.983351	0.232992	0.281054	1.06485	2.02795	0.285545	0.713703	0.17144
934	Regions/WT	4033.7	14862.2	0		0.775978	0.870306	0.144494	0.648134	0.833546	0.294544	0.415954	1.10249	2.08849	0.256747	0.505946	0.128971
935	Regions/WT	4113.7	14862.2	0		0.749091	0.996272	0.130534	0.603214	0.829219	0.271104	0.346623	1.09386	2.46418	0.358994	0.588511	0.115328
936	Regions/WT	4193.7	14862.2	0		0.85484	1.05085	0.161206	0.592473	0.817866	0.219755	0.254062	1.0351	2.21935	0.286941	0.456902	0.11738
937	Regions/WT	4273.7	14862.2	0		0.96182	1.07324	0.166373	0.634045	0.758555	0.393418	0.402893	0.979864	1.92884	0.315306	0.378789	0.112986
938	Regions/WT	4353.7	14862.2	0		1.01447	1.18781	0.151924	0.745087	0.667791	0.395893	0.471542	0.844036	1.63192	0.357458	0.328927	0.119579
939	Regions/WT	4433.7	14862.2	0		0.9925	1.00261	0.133717	0.578859	0.592145	0.404853	0.501982	1.01109	1.82605	0.372258	0.495669	0.107053
940	Regions/WT	4513.7	14862.2	0		0.817802	1.00608	0.162434	0.693693	0.768736	0.264417	0.369686	0.949429	1.8839	0.219519	0.453503	0.13029
941	Regions/WT	4593.7	14862.2	0		0.922803	0.893532	0.13058	0.360355	0.817467	0.226369	0.256301	1.07405	1.89681	0.352446	0.639375	0.0936991
942	Regions/WT	4673.7	14862.2	0		0.932441	0.943168	0.128213	0.724614	0.770419	0.0148128	0.0168616	1.05454	2.05166	0.405619	0.533086	0.103939
943	Regions/WT	4753.7	14862.2	0		0.809361	0.998807	0.168289	0.663835	0.804795	0.245808	0.296709	0.986762	2.16865	0.0329469	0.451736	0.124447
944	Regions/WT	4833.7	14862.2	0		0.846271	0.931228	0.14231	0.594972	0.832529	0.280902	0.316358	1.12979	2.54711	0.380115	0.679504	0.140185
945	Regions/WT	4913.7	14862.2	0		0.769409	0.999196	0.153746	0.441418	0.933468	0.273989	0.361212	1.07992	2.06459	0.0305887	0.572196	0.119384
946	Regions/WT	4993.7	14862.2	0		0.861075	1.10407	0.147999	0.526859	0.795008	0.303906	0.461088	0.880261	1.83887	0.0351501	0.557981	0.134545
947	Regions/WT	5073.7	14862.2	0		0.828946	1.01793	0.162348	0.61725	0.703263	0.352261	0.602367	0.889091	1.92463	0.375216	0.523237	0.144767
948	Regions/WT	5153.7	14862.2	0		0.939016	1.10159	0.116899	0.714462	0.884724	0.445527	0.586364	0.88788	1.76685	0.362211	0.351	0.0944186
949	Regions/WT	5233.7	14862.2	0		1.06018	1.46289	0.209257	0.888851	0.883738	0.229497	0.313831	0.72016	1.80813	0.0518064	0.331778	0.154603
950	Regions/WT	5313.7	14862.2	0		0.0349987	1.34888	0.0405715	24.1642	1.05911	1.08278	1.08419	0.866651	26.919	1.20983	0.788314	14.7218
951	Regions/WT	5393.7	14862.2	0		1.04456	1.3299	0.169461	0.0890593	0.676441	0.0710945	0.0982604	0.921319	2.75525	0.100252	0.714601	0.0205397
952	Regions/WT	5473.7	14862.2	0		1.16859	1.40481	0.134411	0.725348	0.70589	0.265214	0.363109	0.877493	2.23029	0.0815087	0.47903	0.109318
953	Regions/WT	5553.7	14862.2	0		1.06042	0.85055	0.0988803	0.539401	0.87027	0.151468	0.165082	1.24249	2.66142	0.0555644	0.537624	0.0513681
954	Regions/WT	5633.7	14862.2	0		0.868586	1.11175	0.161194	0.821386	0.937146	0.354399	0.427795	1.02555	2.27122	0.0585799	0.565351	0.127609
955	Regions/WT	5713.7	14862.2	0		1.19926	2.00543	0.190837	0.10291	0.908295	0.466497	0.607789	0.64165	2.29603	0.115843	0.438166	0.0108488
981	Regions/WT	2033.7	14782.2	0		0.94661	1.47748	0.321769	1.07476	1.05911	1.08278	1.08419	0.702875	2.30818	1.20983	0.788314	0.654784
982	Regions/WT	2113.7	14782.2	0		0.914065	1.00059	0.131032	0.91638	0.836575	0.351188	12.1388	0.943922	2.21874	0.0795781	0.686854	0.193956
983	Regions/WT	2193.7	14782.2	0		1.05248	1.14231	0.158983	0.659406	0.799061	0.612275	0.680434	0.937987	2.19298	0.647103	0.741753	0.185163
984	Regions/WT	2273.7	14782.2	0		0.854092	1.07344	0.18278	0.440601	0.672284	0.670411	1.16086	0.903722	1.72262	0.0358278	0.589164	0.163603
985	Regions/WT	2353.7	14782.2	0		0.8735	0.880452	0.112563	0.420905	0.799576	0.0169523	0.019506	1.15456	2.27902	0.282526	0.606052	0.11245
986	Regions/WT	2433.7	14782.2	0		0.919729	0.900055	0.131171	0.521011	0.933705	0.297687	0.365782	1.11487	1.94203	0.477319	0.554153	0.113731
987	Regions/WT	2513.7	14782.2	0		1.30406	1.57608	0.11805	0.517017	0.705496	0.0186037	0.0256584	0.678879	1.85698	0.0538693	0.231204	0.0468404
988	Regions/WT	2593.7	14782.2	0		0.9598	1.83284	0.23718	1.07476	1.1315	0.0497397	0.0766851	0.5708	1.94879	1.20983	0.390435	0.023872
989	Regions/WT	2673.7	14782.2	0		0.777959	1.34152	0.202595	0.843334	0.772809	0.0733749	0.0863655	0.859181	1.78544	0.091896	0.478476	0.188857
990	Regions/WT	2753.7	14782.2	0		1.04206	1.34244	0.125362	0.0830909	0.488338	0.332205	0.41561	0.895596	2.66545	0.093534	0.465018	0.0109663
991	Regions/WT	2833.7	14782.2	0		0.94661	1.47748	0.321769	1.07476	1.05911	1.08278	1.08419	0.702875	2.30818	1.20983	0.788314	0.654784
992	Regions/WT	2913.7	14782.2	0		0.94661	1.47748	0.321769	1.07476	1.05911	1.08278	1.08419	0.702875	2.30818	1.20983	0.788314	0.654784
993	Regions/WT	2993.7	14782.2	0		0.94661	1.47748	0.321769	1.07476	1.05911	1.08278	1.08419	0.702875	2.30818	1.20983	0.788314	0.654784
994	Regions/WT	3073.7	14782.2	0		23.1448	1.47748	0.321769	27.2648	1.05911	1.08278	1.08419	0.702875	2.30818	1.20983	0.788314	16.6108
995	Regions/WT	3153.7	14782.2	0		0.94661	1.47748	0.321769	1.07476	1.05911	1.08278	1.08419	0.702875	2.30818	1.20983	0.788314	0.654784
996	Regions/WT	3233.7	14782.2	0		1.13337	1.14576	0.173658	0.530118	0.659391	0.377253	0.591405	0.909909	2.13823	0.0460483	0.442904	0.113327
997	Regions/WT	3313.7	14782.2	0		0.911996	1.03697	0.180201	0.786414	0.775155	0.231069	0.298275	1.05792	2.20402	0.0491416	0.41004	0.0903295
998	Regions/WT	3393.7	14782.2	0		0.785467	1.02422	0.184291	0.514952	0.863013	0.253696	0.40821	0.9911	1.8094	0.0354369	0.466357	0.115894
999	Regions/WT	3473.7	14782.2	0		0.796523	1.1645	0.159926	0.647535	0.826271	0.296445	0.434557	0.871603	1.72927	0.0324135	0.358622	0.104332
1000	Regions/WT	3553.7	14782.2	0		0.798009	1.52116	0.0103049	1.07476	0.0326126	0.0549513	1.08419	0.467876	1.75643	1.20983	0.373805	0.0142745
1001	Regions/WT	3633.7	14782.2	0		1.08484	1.07764	0.134631	0.490334	0.74138	0.360279	0.466301	0.929069	1.88109	0.371626	0.531727	0.0954266
1002	Regions/WT	3713.7	14782.2	0		0.71139	0.833352	0.125189	19.4332	0.917374	0.352759	0.511763	1.02619	1.94049	1.20983	0.645669	0.213651
1003	Regions/WT	3793.7	14782.2	0		0.72042	0.929249	0.151044	0.649751	0.951074	0.327701	0.388489	1.00921	1.93482	0.395629	0.640174	0.16925
1004	Regions/WT	3873.7	14782.2	0		0.838484	1.04255	0.140355	1.07476	0.924191	0.0602567	0.057598	0.749999	1.99843	1.20983	0.328122	0.0131792
1005	Regions/WT	3953.7	14782.2	0		0.640512	0.97069	0.153198	0.608972	0.745544	0.220147	0.281728	1.02563	1.91775	0.43529	0.476102	0.125261
1006	Regions/WT	4033.7	14782.2	0		0.847655	0.82906	0.133782	0.560352	0.866104	0.294537	0.369066	1.04893	2.13111	0.228307	0.487831	0.115417
1007	Regions/WT	4113.7	14782.2	0		0.739709	0.8763	0.135783	0.481019	0.730043	0.182656	0.209372	1.14923	1.94752	0.222112	0.655838	0.162968
1008	Regions/WT	4193.7	14782.2	0		1.02717	1.18824	0.182691	0.951322	0.792862	0.317454	0.358234	0.852376	1.80565	0.0449586	0.378808	0.171184
1009	Regions/WT	4273.7	14782.2	0		0.878214	1.11212	0.133634	0.785322	0.846582	0.388649	0.461882	0.860228	1.52584	0.0330101	0.464356	0.146669
1010	Regions/WT	4353.7	14782.2	0		0.725171	1.04207	0.0122617	1.07476	1.02079	18.7561	18.7805	0.741047	1.87584	1.20983	0.487188	0.0200831
1011	Regions/WT	4433.7	14782.2	0		0.956042	1.304	0.140158	0.548957	0.621424	0.403487	0.500182	0.735574	1.44818	0.0297509	0.46146	0.126784
1012	Regions/WT	4513.7	14782.2	0		0.975499	1.21379	0.152332	0.452272	0.844509	0.348645	0.499393	0.828294	1.68561	0.0318599	0.439925	0.0859591
1013	Regions/WT	4593.7	14782.2	0		0.80548	1.056	0.131594	0.566951	0.713016	0.388585	0.434412	0.999514	2.09878	0.348216	0.471656	0.117026
1014	Regions/WT	4673.7	14782.2	0		0.957614	1.32754	0.183305	0.628219	0.79772	0.490756	0.586811	0.879287	1.83217	0.0433007	0.492807	0.167959
1015	Regions/WT	4753.7	14782.2	0		0.94956	1.01579	0.137658	0.543614	0.793607	0.306168	0.409882	0.984853	1.92449	0.299916	0.35342	0.0845157
1016	Regions/WT	4833.7	14782.2	0		0.904848	1.15339	0.198191	0.926964	0.852011	0.255317	0.308086	0.866106	1.67373	0.461489	0.414015	0.150764
1017	Regions/WT	4913.7	14782.2	0		0.933301	1.12339	0.146949	0.886534	0.865041	0.518931	0.721051	0.796233	1.69057	0.400019	0.348576	0.12778
1018	Regions/WT	4993.7	14782.2	0		1.82274	2.27653	0.0201847	1.07476	1.05911	1.08278	1.08419	0.489802	2.01963	1.20983	0.0254886	0.0211711
1019	Regions/WT	5073.7	14782.2	0		0.97304	1.5884	0.18783	0.359955	0.832576	0.459125	0.531194	0.726917	1.738	0.0462232	0.324397	0.0587598
1020	Regions/WT	5153.7	14782.2	0		0.954113	1.11423	0.173056	1.04305	0.986311	0.334304	0.390474	0.941701	1.96995	0.0471289	0.659433	0.222868
1021	Regions/WT	5233.7	14782.2	0		1.1981	1.29282	0.0888323	0.549484	0.764979	1.08278	0.0387374	0.967677	2.79943	0.0716219	0.292936	0.0483201
1022	Regions/WT	5313.7	14782.2	0		0.94661	1.47748	0.321769	1.07476	1.05911	1.08278	1.08419	0.702875	2.30818	1.20983	0.788314	0.654784
1023	Regions/WT	5393.7	14782.2	0		1.25809	1.73416	0.173058	0.803638	0.695113	0.412226	0.506726	0.661112	2.60221	0.741809	0.319189	0.0795891
1024	Regions/WT	5473.7	14782.2	0		0.94661	1.47748	0.321769	1.07476	1.05911	1.08278	1.08419	0.702875	2.30818	1.20983	0.788314	0.654784
1025	Regions/WT	5553.7	14782.2	0		1.14065	1.05738	0.0865468	0.649797	0.661093	0.0207921	0.0301014	1.03272	3.05488	0.0874299	0.297298	0.0415023
1026	Regions/WT	5633.7	14782.2	0		1.04373	1.23724	0.159925	0.585283	0.700617	0.382125	0.528076	0.926802	2.49042	0.0489298	0.590757	0.120331
1054	Regions/WT	2113.7	14702.2	0		0.0373871	1.50023	0.0204421	1.07476	1.05911	1.08278	1.08419	0.629671	1.44896	1.20983	0.0435943	0.03621
1055	Regions/WT	2193.7	14702.2	0		1.00272	1.10423	0.182736	0.883212	0.709731	0.0561845	1.08419	0.880897	2.34917	0.0629178	0.533641	0.282012
1056	Regions/WT	2273.7	14702.2	0		0.652	1.08882	0.0125822	1.07476	0.8065	19.1527	19.1776	0.774815	1.26701	1.20983	0.041213	0.0342321
1057	Regions/WT	2353.7	14702.2	0		0.766825	0.852742	0.15086	0.38222	0.813504	0.292157	0.33104	1.12328	2.10069	0.0262558	0.668201	0.103227
1058	Regions/WT	2433.7	14702.2	0		0.891441	1.07246	0.13587	0.738704	0.832354	0.314972	0.373377	0.904941	1.9111	0.397871	0.375623	0.124404
1059	Regions/WT	2513.7	14702.2	0		0.874717	1.26068	0.153095	0.565782	0.805431	0.425384	0.518516	0.820782	1.65028	0.0347941	0.520143	0.137626
1060	Regions/WT	2593.7	14702.2	0		0.792929	1.38462	0.182969	1.07476	1.63147	1.08278	1.08419	0.570537	1.27384	1.20983	0.484396	0.0237492
1061	Regions/WT	2673.7	14702.2	0		0.94661	1.47748	0.321769	1.07476	1.05911	1.08278	1.08419	0.702875	2.30818	1.20983	0.788314	0.654784
1062	Regions/WT	2753.7	14702.2	0		0.94661	13.6991	0.038694	1.07476	1.05911	1.08278	1.08419	0.0845235	28.9724	1.20983	0.788314	0.654784
1063	Regions/WT	2833.7	14702.2	0		0.94661	1.47748	0.321769	1.07476	1.05911	1.08278	1.08419	0.702875	2.30818	1.20983	0.788314	0.654784
1064	Regions/WT	2913.7	14702.2	0		0.94661	1.47748	0.321769	1.07476	1.05911	1.08278	1.08419	0.702875	2.30818	1.20983	0.788314	0.654784
1065	Regions/WT	2993.7	14702.2	0		0.826486	1.29809	0.192283	1.00756	0.888157	0.339277	0.460816	0.871182	1.68098	0.0728132	0.361855	0.137316
1066	Regions/WT	3073.7	14702.2	0		0.94661	1.47748	0.321769	1.07476	1.05911	1.08278	1.08419	0.702875	2.30818	1.20983	0.788314	0.654784
1067	Regions/WT	3153.7	14702.2	0		1.30998	1.54007	0.168379	0.61816	0.766691	0.340079	0.47064	0.634671	1.84205	0.0544676	0.21332	0.068531
1068	Regions/WT	3233.7	14702.2	0		0.989868	1.12915	0.16228	0.506599	0.870159	0.28456	0.37912	0.973134	1.97376	0.0323476	0.37598	0.0960879
1069	Regions/WT	3313.7	14702.2	0		0.950955	0.923712	0.151173	0.636088	0.787195	0.216177	0.315763	1.06322	1.95961	0.0376304	0.649653	0.14057
1070	Regions/WT	3393.7	14702.2	0		0.792201	0.994483	0.130911	0.703511	0.83378	0.279495	0.361355	0.970926	1.76651	0.26614	0.455456	0.15829
1071	Regions/WT	3473.7	14702.2	0		0.883782	0.983569	0.145232	0.873292	1.08392	0.0243208	0.0281032	0.971433	1.87292	0.507239	0.487398	0.153083
1072	Regions/WT	3553.7	14702.2	0		0.879812	1.00787	0.148279	0.549237	0.754919	0.278192	0.324997	0.979338	1.92131	0.304429	0.617508	0.137826
1073	Regions/WT	3633.7	14702.2	0		0.844791	1.43486	0.189527	1.07476	0.58579	0.793318	16.8629	0.799826	2.03167	1.20983	0.713785	0.0221204
1074	Regions/WT	3713.7	14702.2	0		0.846926	0.995933	0.140952	0.719673	0.742458	0.243314	0.309621	1.07596	2.1163	0.512299	0.532889	0.125139
1075	Regions/WT	3793.7	14702.2	0		0.766423	0.902128	0.188473	0.93436	0.834083	0.0405454	0.057292	0.887481	1.86393	0.0628614	0.623768	0.265525
1076	Regions/WT	3873.7	14702.2	0		0.93787	1.27288	0.132045	0.758943	0.871515	0.361113	0.497804	0.754476	1.96087	0.0456846	0.311329	0.103406
1077	Regions/WT	3953.7	14702.2	0		0.725031	1.00439	0.169468	0.663849	1.10541	0.543654	0.504853	0.905396	1.88412	0.0488664	0.63778	0.161042
1078	Regions/WT	4033.7	14702.2	0		0.818552	0.891717	0.129217	0.659515	0.911986	0.281011	0.322512	1.13373	1.99679	0.3969	0.614728	0.166483
1079	Regions/WT	4113.7	14702.2	0		0.809461	0.842685	0.0974381	0.514819	0.72067	0.0119555	0.0154689	1.09252	2.09896	0.294418	0.530786	0.0887034
1080	Regions/WT	4193.7	14702.2	0		0.956317	0.918971	0.136442	0.575524	0.763469	0.328601	0.4689	1.08551	2.07324	0.349509	0.482152	0.120939
1081	Regions/WT	4273.7	14702.2	0		0.777248	0.969562	0.128686	0.715635	0.913092	0.27911	0.383274	0.980045	1.7957	0.300478	0.568579	0.152088
1082	Regions/WT	4353.7	14702.2	0		0.937421	1.11151	0.145886	0.545064	0.736195	0.307604	0.451585	0.929052	1.74437	0.288712	0.475866	0.107722
1083	Regions/WT	4433.7	14702.2	0		0.884369	1.28617	0.151865	0.90411	0.746781	0.359918	0.559253	0.69855	1.48101	0.0322027	0.43843	0.200122
1084	Regions/WT	4513.7	14702.2	0		1.14492	1.1378	0.0983052	0.412285	0.536601	0.439154	0.575407	0.922964	2.27387	0.347545	0.392466	0.0555882
1085	Regions/WT	4593.7	14702.2	0		0.972348	1.33173	0.175367	0.714249	0.755753	0.381301	0.623588	0.899606	1.89585	0.0428085	0.460673	0.139474
1086	Regions/WT	4673.7	14702.2	0		0.94661	18.352	0.0183672	1.07476	22.2438	1.08278	1.08419	0.0401215	23.3434	1.20983	0.0341553	0.0283699
1087	Regions/WT	4753.7	14702.2	0		0.884012	1.16067	0.136118	0.54436	0.694989	0.348288	0.528732	0.880253	1.7431	0.260446	0.396597	0.0799083
1088	Regions/WT	4833.7	14702.2	0		0.939419	1.25833	0.17395	0.82331	0.83559	0.410614	0.669615	0.829086	1.67274	0.549958	0.326405	0.114366
1089	Regions/WT	4913.7	14702.2	0		0.968476	1.75419	0.230518	0.664668	0.843625	0.369361	0.570304	0.641888	1.5509	0.0678289	0.341138	0.0869627
1090	Regions/WT	4993.7	14702.2	0		0.94661	1.47748	0.321769	1.07476	1.05911	1.08278	1.08419	0.702875	2.30818	1.20983	0.788314	0.654784
1091	Regions/WT	5073.7	14702.2	0		0.884127	0.993908	0.14302	0.736568	0.861955	0.302912	0.389729	0.990649	2.36779	0.436928	0.669225	0.178948
1092	Regions/WT	5153.7	14702.2	0		0.781082	0.914307	0.109501	0.778493	0.953407	0.0157096	0.0210228	1.20046	2.5144	0.0449584	0.500191	0.104827
1093	Regions/WT	5233.7	14702.2	0		1.03076	1.2202	0.180304	0.533379	0.886505	0.239511	0.220425	1.04415	2.17187	0.0614721	0.554282	0.11279
1094	Regions/WT	5313.7	14702.2	0		1.16227	1.94293	0.158263	0.505405	0.77784	0.470649	0.614125	0.572796	1.60004	0.0548424	0.245038	0.0700343
1095	Regions/WT	5393.7	14702.2	0		1.21331	1.34349	0.122346	0.808334	0.765277	1.08278	1.08419	0.886346	4.09291	0.130975	0.788314	4.549
1096	Regions/WT	5473.7	14702.2	0		1.08649	1.29974	0.189079	0.831996	0.684158	0.418275	0.442518	0.909316	2.5628	0.0752202	0.711307	0.179561
1097	Regions/WT	5553.7	14702.2	0		0.995212	1.07567	0.139142	0.558203	0.862737	0.0179815	0.0326033	0.997455	2.88426	0.341841	0.466276	0.0712354
1126	Regions/WT	2193.7	14622.2	0		0.94661	1.47748	0.321769	1.07476	1.05911	1.08278	1.08419	0.702875	2.30818	1.20983	0.788314	0.654784
1127	Regions/WT	2273.7	14622.2	0		0.63697	19.4985	0.0259194	1.07476	1.05911	1.08278	1.08419	0.0566186	38.8278	1.20983	0.0434629	0.0361009
1128	Regions/WT	2353.7	14622.2	0		0.986495	1.18978	0.14735	0.567378	0.77891	0.329892	0.404049	0.829259	1.94843	0.033383	0.430724	0.0937106
1129	Regions/WT	2433.7	14622.2	0		1.06813	1.08464	0.167295	0.753798	0.958873	0.480812	0.506942	0.894828	1.74265	0.414897	0.483038	0.138198
1130	Regions/WT	2513.7	14622.2	0		0.963596	1.20574	0.162367	0.468534	0.912684	0.312408	0.391781	0.849747	2.05737	0.345827	0.502242	0.0976916
1131	Regions/WT	2593.7	14622.2	0		1.06035	1.49267	0.189971	1.04142	0.70229	0.418971	0.438711	0.670208	1.48056	0.0515584	0.23451	0.134026
1132	Regions/WT	2673.7	14622.2	0		0.70051	0.992682	0.0133367	1.07476	0.0527888	0.0559901	1.08419	0.87716	2.02637	1.20983	0.0292756	0.0243167
1133	Regions/WT	2753.7	14622.2	0		1.16012	1.30332	0.137765	0.452273	0.818468	0.336601	0.494846	0.811269	1.8734	0.0447434	0.38079	0.0858875
1134	Regions/WT	2833.7	14622.2	0		0.94661	8.43772	0.0493593	1.07476	1.05911	1.08278	1.08419	0.107821	2.30818	1.20983	0.788314	0.654784
1135	Regions/WT	2913.7	14622.2	0		0.896126	1.08056	0.167009	0.524627	0.869442	0.337109	0.552021	0.819411	1.73305	0.0451606	0.309029	0.0890908
1136	Regions/WT	2993.7	14622.2	0		0.982955	1.22851	0.0921453	0.451903	0.714919	0.351576	0.415999	0.784427	1.73847	0.296393	0.27815	0.0496671
1137	Regions/WT	3073.7	14622.2	0		1.1262	1.26107	0.141206	0.635099	0.828808	0.309096	0.375448	0.805164	1.83006	0.300546	0.347261	0.107601
1138	Regions/WT	3153.7	14622.2	0		0.992603	0.994944	0.122005	0.667109	0.752698	0.340282	0.379578	1.05126	2.17325	0.439259	0.367803	0.0795523
1139	Regions/WT	3233.7	14622.2	0		0.973829	1.03519	0.112005	0.444901	0.81881	0.266348	0.28556	0.94378	1.83613	0.319775	0.401742	0.0703071
1140	Regions/WT	3313.7	14622.2	0		0.951537	0.990376	0.149295	0.565195	0.784063	0.24113	0.332849	1.00508	2.05744	0.376728	0.384804	0.0848794
1141	Regions/WT	3393.7	14622.2	0		0.768033	1.20687	0.133241	0.668206	0.749545	0.201333	0.278938	0.79415	2.22767	0.290583	0.448775	0.117165
1142	Regions/WT	3473.7	14622.2	0		0.927102	1.17811	0.147952	0.85082	0.83091	0.336179	0.431094	0.827434	1.66686	0.39241	0.455677	0.149103
1143	Regions/WT	3553.7	14622.2	0		1.12243	1.14597	0.132103	0.357926	0.805989	0.253289	0.3652	0.925331	1.92722	0.311048	0.542268	0.0904927
1144	Regions/WT	3633.7	14622.2	0		0.787008	0.860374	0.139437	0.623543	0.938438	0.197475	0.379095	1.05426	2.29898	0.5027	0.590985	0.165063
1145	Regions/WT	3713.7	14622.2	0		0.816625	1.04021	0.146968	0.577023	0.89108	0.2703	0.384652	0.92373	1.9641	0.486726	0.438598	0.123579
1146	Regions/WT	3793.7	14622.2	0		0.743714	0.906558	0.194212	0.911509	0.961463	0.0647189	1.08419	1.05924	2.10305	0.0642638	0.986186	0.368954
1147	Regions/WT	3873.7	14622.2	0		0.0341451	0.655128	0.0214333	1.07476	20.0759	1.08278	1.08419	0.964725	40.151	1.20983	0.949608	0.0393391
1148	Regions/WT	3953.7	14622.2	0		0.913056	1.21908	0.164994	0.657907	0.834619	0.234502	0.366416	0.897952	1.79487	0.304884	0.485857	0.108763
1149	Regions/WT	4033.7	14622.2	0		1.0176	1.39471	0.140507	0.666044	0.850947	0.246686	0.327202	0.708167	1.77636	0.215853	0.225771	0.0641391
1150	Regions/WT	4113.7	14622.2	0		0.945714	1.05306	0.109483	0.657351	0.924568	0.273466	0.312406	0.999877	1.83703	0.362133	0.386831	0.104427
1151	Regions/WT	4193.7	14622.2	0		0.918078	1.10852	0.140728	0.638801	0.864114	0.26144	0.345364	0.913495	1.92417	0.373012	0.399003	0.109754
1152	Regions/WT	4273.7	14622.2	0		0.812669	0.99686	0.145185	0.677037	0.795724	0.239498	0.448872	1.13824	1.92535	0.239519	0.514654	0.115542
1153	Regions/WT	4353.7	14622.2	0		0.935504	1.39168	0.216858	0.704123	0.862726	0.509395	0.811046	0.74464	1.67003	0.0469053	0.256485	0.110647
1154	Regions/WT	4433.7	14622.2	0		1.23659	1.46841	0.287417	1.07476	0.902906	1.08278	1.08419	0.649684	2.3546	1.20983	0.0394193	0.0327422
1155	Regions/WT	4513.7	14622.2	0		1.16802	1.38653	0.140596	0.500059	0.648916	0.48859	0.738344	0.732856	1.70515	0.0373733	0.430163	0.13328
1156	Regions/WT	4593.7	14622.2	0		0.902879	1.18087	0.154588	0.364489	0.656483	0.344301	0.53568	0.800995	1.82052	0.286459	0.438966	0.0595671
1157	Regions/WT	4673.7	14622.2	0		0.861193	1.21484	0.16574	0.703724	0.856944	0.323958	0.511764	0.790348	1.73476	0.363457	0.334297	0.0963111
1158	Regions/WT	4753.7	14622.2	0		0.875066	1.17609	0.190001	0.576601	0.773615	0.410167	0.485098	0.863363	1.66819	0.0368721	0.488274	0.12203
1159	Regions/WT	4833.7	14622.2	0		0.929878	1.1255	0.153147	0.551412	0.762215	0.253955	0.429039	0.802947	1.53909	0.0249324	0.417735	0.147765
1160	Regions/WT	4913.7	14622.2	0		0.861627	1.24177	0.199235	1.11677	0.755721	0.427736	0.489382	0.79934	1.51901	0.0674098	0.380082	0.163524
1161	Regions/WT	4993.7	14622.2	0		0.946086	1.00208	0.118662	0.450511	0.738496	0.372363	0.491599	1.04224	2.11407	0.261072	0.496789	0.0995327
1162	Regions/WT	5073.7	14622.2	0		0.885134	0.974605	0.168492	0.538274	0.766541	0.379983	0.490465	1.0204	2.13303	0.371905	0.623358	0.145284
1163	Regions/WT	5153.7	14622.2	0		0.960643	1.4972	0.18914	0.607368	1.03191	0.307958	0.398396	0.720004	1.93191	0.459231	0.535734	0.14409
1164	Regions/WT	5233.7	14622.2	0		0.750842	1.20189	0.154836	0.387944	0.79142	0.372946	0.553128	1.02075	2.11737	0.289482	0.486035	0.101501
1165	Regions/WT	5313.7	14622.2	0		0.724797	1.26861	0.290651	1.07476	1.13324	1.08278	1.08419	0.829998	2.77427	1.20983	1.04463	0.0278098
1166	Regions/WT	5393.7	14622.2	0		1.0963	1.37883	0.221305	0.844363	1.0851	0.243174	0.340058	0.970022	2.95338	0.0795314	0.413581	0.101798
1196	Regions/WT	2273.7	14542.2	0		0.793903	0.952314	0.147147	0.447599	0.793988	0.521502	1.15092	1.11253	2.08224	0.049891	1.00642	0.207693
1197	Regions/WT	2353.7	14542.2	0		0.94661	1.47748	0.321769	1.07476	1.05911	1.08278	1.08419	0.702875	2.30818	1.20983	0.788314	0.654784
1198	Regions/WT	2433.7	14542.2	0		1.0505	1.16724	0.128964	0.376573	0.846725	0.517297	0.466286	0.910785	1.80681	0.233413	0.40231	0.0802755
1199	Regions/WT	2513.7	14542.2	0		0.850304	1.04708	0.14349	0.450392	0.858618	0.335294	0.406111	0.945118	1.96352	0.3313	0.573285	0.127935
1200	Regions/WT	2593.7	14542.2	0		0.908702	0.946725	0.135688	0.631924	0.748979	0.378196	0.475155	0.885291	1.94945	0.203354	0.448326	0.119283
1201	Regions/WT	2673.7	14542.2	0		0.928836	0.938179	0.109602	0.55972	0.594973	0.255584	0.458928	0.898593	2.12522	0.0266928	0.871991	0.189913
1202	Regions/WT	2753.7	14542.2	0		0.998864	0.962473	0.122768	0.880677	0.772724	0.258675	0.310142	0.970598	2.04503	0.512213	0.506544	0.119042
1203	Regions/WT	2833.7	14542.2	0		0.94661	1.47748	0.321769	1.07476	1.05911	1.08278	1.08419	0.702875	2.30818	1.20983	0.788314	0.654784
1204	Regions/WT	2913.7	14542.2	0		1.1479	1.10367	0.0833315	0.656085	0.69795	1.08278	1.08419	0.89846	2.42408	0.054454	0.337059	0.0671057
1205	Regions/WT	2993.7	14542.2	0		0.866078	0.980892	0.0940125	0.503582	0.900615	0.295593	0.336853	0.929737	2.15308	0.46846	0.468383	0.0907023
1206	Regions/WT	3073.7	14542.2	0		0.794511	1.06698	0.12693	0.483963	0.751308	0.286348	0.369318	0.95169	2.05534	0.392477	0.479986	0.100609
1207	Regions/WT	3153.7	14542.2	0		0.840542	0.967407	0.0836841	0.365614	0.768171	0.0132071	0.0154239	0.962603	2.41068	0.384431	0.481381	0.0581396
1208	Regions/WT	3233.7	14542.2	0		1.05901	1.15541	0.132882	0.836818	1.11789	0.280638	0.384866	0.850802	2.15435	0.478655	0.31727	0.0995725
1209	Regions/WT	3313.7	14542.2	0		0.942154	1.10024	0.143072	0.60218	0.829089	0.314354	0.367948	0.971076	2.0418	0.335256	0.414678	0.105147
1210	Regions/WT	3393.7	14542.2	0		0.850247	1.11561	0.162621	0.514694	0.846539	0.242386	0.316594	0.915819	1.85347	0.388742	0.530784	0.122312
1211	Regions/WT	3473.7	14542.2	0		0.963737	1.08328	0.136441	0.655294	0.721758	0.287385	0.379132	1.00835	1.95187	0.284445	0.373812	0.100376
1212	Regions/WT	3553.7	14542.2	0		0.974148	1.03991	0.1528	0.566221	0.768236	0.290212	0.463529	0.896384	1.86401	0.473147	0.574672	0.131561
1213	Regions/WT	3633.7	14542.2	0		1.00832	1.19307	0.166729	0.577526	0.805822	0.291108	0.369608	0.781826	1.67994	0.252474	0.216101	0.0806169
1214	Regions/WT	3713.7	14542.2	0		0.781171	0.930703	0.155324	0.73539	0.879484	0.310379	0.542078	0.971958	1.93199	0.435724	0.542854	0.146211
1215	Regions/WT	3793.7	14542.2	0		0.920059	1.04839	0.136618	0.678546	0.866268	0.40424	0.442384	0.902791	2.01646	0.401172	0.510535	0.14781
1216	Regions/WT	3873.7	14542.2	0		0.94661	1.47748	0.321769	1.07476	1.05911	1.08278	1.08419	0.702875	2.30818	1.20983	0.788314	0.654784
1217	Regions/WT	3953.7	14542.2	0		0.776925	1.1944	0.0105338	1.07476	0.769493	0.0456664	1.08419	0.844666	1.98857	1.20983	0.607012	0.0193554
1218	Regions/WT	4033.7	14542.2	0		0.8022	0.842596	0.156703	1.22425	0.978815	0.0292143	0.0363512	1.13413	2.19855	0.0521222	0.532696	0.229644
1219	Regions/WT	4113.7	14542.2	0		0.871202	1.15197	0.154856	0.706907	1.24745	0.292775	0.875278	0.816189	1.91114	0.056708	0.667905	0.16583
1220	Regions/WT	4193.7	14542.2	0		0.837156	0.910004	0.135201	0.590308	0.72106	0.222825	0.359848	1.05863	2.45016	0.444369	0.703311	0.153027
1221	Regions/WT	4273.7	14542.2	0		1.00371	1.27568	0.166879	0.501425	0.862037	0.370116	0.470924	0.782681	1.8104	0.241249	0.267604	0.0760094
1222	Regions/WT	4353.7	14542.2	0		1.08246	1.32957	0.149665	0.563261	0.568474	0.415241	0.555519	0.830791	1.64576	0.331517	0.321153	0.06105
1223	Regions/WT	4433.7	14542.2	0		0.985169	1.12269	0.158659	0.587251	0.648122	0.269923	0.366493	0.945719	1.83071	0.327417	0.453408	0.110693
1224	Regions/WT	4513.7	14542.2	0		0.909429	1.13913	0.223368	0.054856	0.695239	1.08278	1.08419	0.909782	1.88317	0.0617504	0.593595	0.020999
1225	Regions/WT	4593.7	14542.2	0		0.981002	1.11493	0.171642	0.595301	0.902266	0.26018	0.371562	0.803759	1.82185	0.0355376	0.482936	0.127784
1226	Regions/WT	4673.7	14542.2	0		0.858606	1.26851	0.153797	0.77049	0.855506	0.376875	0.625486	0.72471	1.48633	0.0385234	0.438242	0.178307
1227	Regions/WT	4753.7	14542.2	0		0.875477	1.29473	0.184488	0.873027	0.718381	0.283135	0.483453	0.752782	1.93905	0.0432743	0.423721	0.186664
1228	Regions/WT	4833.7	14542.2	0		0.899461	1.04969	0.181086	0.569987	0.914542	0.421397	0.507493	0.984882	1.66879	0.0365421	0.586289	0.15479
1229	Regions/WT	4913.7	14542.2	0		0.94661	1.47748	0.321769	1.07476	1.05911	1.08278	1.08419	0.702875	2.30818	1.20983	0.788314	0.654784
1230	Regions/WT	4993.7	14542.2	0		0.872611	1.08098	0.122645	0.666821	0.714253	0.220772	0.290404	1.00836	2.19691	0.317167	0.35055	0.0940941
1231	Regions/WT	5073.7	14542.2	0		0.0532132	0.194572	0.321769	1.07476	1.05911	1.08278	1.08419	5.33727	0.111273	1.20983	0.788314	0.654784
1232	Regions/WT	5153.7	14542.2	0		0.94661	1.47748	0.321769	1.07476	1.05911	1.08278	1.08419	0.702875	0.0958888	1.20983	0.788314	0.654784
1233	Regions/WT	5233.7	14542.2	0		0.976154	1.41382	0.0236979	1.07476	1.05911	1.08278	1.08419	0.805407	0.991859	1.20983	0.0372274	0.0309216
1234	Regions/WT	5313.7	14542.2	0		1.12034	2.10901	0.180282	1.1705	0.648113	0.298198	0.57517	0.646586	2.25563	0.140325	0.601198	0.16298
1264	Regions/WT	2273.7	14462.2	0		0.94661	1.47748	0.321769	1.07476	1.05911	1.08278	1.08419	0.702875	2.30818	1.20983	0.788314	0.654784
1265	Regions/WT	2353.7	14462.2	0		0.94661	1.47748	0.321769	1.07476	1.05911	1.08278	1.08419	0.702875	2.30818	1.20983	0.788314	0.654784
1266	Regions/WT	2433.7	14462.2	0		1.12876	1.19936	0.230056	1.07476	0.0552388	1.08278	1.08419	0.767031	1.55959	1.20983	0.0217478	0.018064
1267	Regions/WT	2513.7	14462.2	0		0.957373	0.973457	0.149292	0.704351	0.945253	0.296652	0.36938	1.12675	2.28072	0.510748	0.632533	0.138632
1268	Regions/WT	2593.7	14462.2	0		0.76231	0.96746	0.0984459	0.443621	0.854521	0.226428	0.274345	0.990765	1.94021	0.255706	0.53851	0.0965453
1269	Regions/WT	2673.7	14462.2	0		0.77697	1.17845	0.114662	0.496282	0.737185	0.257078	0.340085	0.822053	1.70375	0.470284	0.527793	0.124995
1270	Regions/WT	2753.7	14462.2	0		0.864011	1.0187	0.122878	0.368188	0.772761	0.138876	0.166591	1.01754	2.1002	0.484519	0.612577	0.0862215
1271	Regions/WT	2833.7	14462.2	0		0.843187	1.32658	0.319348	1.07476	0.0449238	1.08278	1.08419	0.606137	1.29776	1.20983	0.0306986	0.0254987
1272	Regions/WT	2913.7	14462.2	0		0.938301	1.26639	0.124718	0.44327	0.773072	0.202812	0.288244	0.803204	1.75841	0.306417	0.442871	0.0716268
1273	Regions/WT	2993.7	14462.2	0		0.661926	0.951689	0.123824	0.504069	0.876045	0.258447	0.359551	0.946156	1.82562	0.32464	0.53352	0.107721
1274	Regions/WT	3073.7	14462.2	0		0.887422	1.08127	0.117398	0.4577	0.831535	0.222879	0.275366	0.856389	1.83052	0.338803	0.443356	0.0932902
1275	Regions/WT	3153.7	14462.2	0		0.933501	1.13261	0.0880961	0.539171	0.905532	0.0162205	0.0199276	0.826801	1.82941	0.359387	0.409311	0.100252
1276	Regions/WT	3233.7	14462.2	0		0.820049	1.32419	0.120932	0.388186	0.821627	0.265432	0.404675	0.712772	1.74656	0.376451	0.431565	0.0756516
1277	Regions/WT	3313.7	14462.2	0		0.903156	1.02701	0.138595	0.477389	0.81394	0.209004	0.280372	0.938535	2.02598	0.361132	0.518892	0.0924833
1278	Regions/WT	3393.7	14462.2	0		0.828436	1.01312	0.157037	0.573078	0.867722	0.23113	0.311802	0.934712	1.99452	0.0270521	0.460748	0.153818
1279	Regions/WT	3473.7	14462.2	0		0.699521	0.972696	0.154676	0.577276	0.736301	0.230664	0.307742	0.81825	1.84264	0.0358543	0.594553	0.158397
1280	Regions/WT	3553.7	14462.2	0		0.810731	1.01792	0.127848	0.481561	0.699368	0.228088	0.47338	0.93033	2.28735	0.23831	0.637601	0.122169
1281	Regions/WT	3633.7	14462.2	0		0.84836	0.762498	0.151463	0.510523	0.764455	0.310081	0.354656	1.25043	2.07339	0.274378	0.695195	0.139983
1282	Regions/WT	3713.7	14462.2	0		0.778137	1.0361	0.1079	0.576257	0.724993	0.256845	0.54416	0.876127	2.17922	0.320301	0.553713	0.13265
1283	Regions/WT	3793.7	14462.2	0		0.865194	1.03361	0.134083	0.499159	0.941086	0.350974	0.539003	0.912886	2.03953	0.0429376	0.448361	0.0808563
1284	Regions/WT	3873.7	14462.2	0		0.874869	1.06137	0.164208	0.625757	0.800727	0.282016	0.351228	0.999658	2.21349	0.0428822	0.394206	0.0886801
1285	Regions/WT	3953.7	14462.2	0		0.856173	1.11661	0.137318	0.686891	0.726394	0.266805	0.48254	0.851076	2.18261	0.199868	0.439187	0.131156
1286	Regions/WT	4033.7	14462.2	0		0.749495	1.08313	0.12995	0.493706	0.822172	0.271179	0.442879	0.905294	2.15765	0.407976	0.615197	0.116351
1287	Regions/WT	4113.7	14462.2	0		0.920579	1.0029	0.126132	0.493481	0.778692	0.214676	0.371183	0.971419	2.12438	0.242982	0.46108	0.0793653
1288	Regions/WT	4193.7	14462.2	0		0.85702	1.11605	0.142486	0.613558	0.826216	0.228301	0.352329	0.981862	1.93099	0.0327075	0.346319	0.0753427
1289	Regions/WT	4273.7	14462.2	0		0.966616	1.09306	0.134007	0.660228	0.842279	0.391314	0.632186	0.863705	1.87101	0.0297097	0.302781	0.0923258
1290	Regions/WT	4353.7	14462.2	0		0.814753	1.14684	0.151251	0.611109	0.91068	0.370914	0.56648	0.844345	1.82423	0.434017	0.463147	0.13245
1291	Regions/WT	4433.7	14462.2	0		0.94661	1.47748	0.321769	1.07476	1.05911	1.08278	1.08419	0.702875	2.30818	1.20983	0.788314	0.654784
1292	Regions/WT	4513.7	14462.2	0		0.981708	1.31891	0.161316	0.671946	0.863669	0.315936	0.420038	0.788717	1.66665	0.353898	0.302496	0.0978397
1293	Regions/WT	4593.7	14462.2	0		0.916481	1.17876	0.151712	0.630822	0.797215	0.24213	0.318147	0.842707	1.79003	0.345853	0.329431	0.0849438
1294	Regions/WT	4673.7	14462.2	0		0.94661	1.47748	0.321769	1.07476	1.05911	1.08278	1.08419	0.702875	2.30818	1.20983	0.788314	0.654784
1295	Regions/WT	4753.7	14462.2	0		0.94661	9.72042	0.321769	1.07476	1.05911	1.08278	1.08419	0.702875	26.6154	1.20983	0.788314	0.654784
1296	Regions/WT	4833.7	14462.2	0		0.918061	1.1759	0.153648	0.732671	0.756877	0.36933	0.571766	0.862124	1.75972	0.0360612	0.462909	0.169413
1297	Regions/WT	4913.7	14462.2	0		0.926945	1.46646	0.166599	0.59917	0.829717	0.27769	0.461099	0.75052	1.87558	0.0320171	0.255711	0.0917285
1298	Regions/WT	4993.7	14462.2	0		0.772616	1.12945	0.174213	0.566751	0.868628	0.306469	0.510982	0.872195	1.85694	0.37812	0.532711	0.13199
1299	Regions/WT	5073.7	14462.2	0		0.872827	1.74172	0.0185459	1.07476	1.05911	0.0577267	1.08419	0.528263	29.2501	1.20983	0.788314	0.654784
1326	Regions/WT	2353.7	14382.2	0		0.94661	1.47748	0.321769	1.07476	1.05911	1.08278	1.08419	0.702875	2.30818	1.20983	0.788314	0.654784
1327	Regions/WT	2433.7	14382.2	0		0.0513344	1.35372	0.0261047	1.07476	1.05911	1.08278	1.08419	0.605563	0.107154	1.20983	0.0404496	0.033598
1328	Regions/WT	2513.7	14382.2	0		0.915124	0.839113	0.143037	0.445787	0.835063	0.256397	0.379564	1.16179	2.23711	0.0310448	0.598108	0.127145
1329	Regions/WT	2593.7	14382.2	0		0.955423	0.940234	0.168846	0.62154	0.68637	0.324858	0.374752	1.07783	2.05459	0.310059	0.612008	0.173537
1330	Regions/WT	2673.7	14382.2	0		0.893189	1.10418	0.117179	0.753575	0.929181	0.230552	0.238985	0.875002	1.77375	0.37003	0.492634	0.159876
1331	Regions/WT	2753.7	14382.2	0		0.952884	1.14937	0.149597	0.350618	0.85921	0.218942	0.201113	0.941037	2.00969	0.432721	0.449489	0.0747517
1332	Regions/WT	2833.7	14382.2	0		0.95086	1.34559	0.144536	0.0497229	1.01592	0.0413259	0.0611695	0.780996	1.59533	0.0559722	0.293313	0.0145442
1333	Regions/WT	2913.7	14382.2	0		1.08107	1.16977	0.136211	0.559905	0.80724	0.331539	0.489877	0.843483	1.54642	0.299778	0.372663	0.0991922
1334	Regions/WT	2993.7	14382.2	0		1.00309	1.15616	0.130569	0.557123	0.742009	0.296901	0.277652	0.879897	1.85163	0.388755	0.453012	0.142835
1335	Regions/WT	3073.7	14382.2	0		0.941894	0.918303	0.121199	0.552931	0.922787	0.236837	0.281196	0.944834	2.15123	0.324808	0.467105	0.105639
1336	Regions/WT	3153.7	14382.2	0		1.06472	1.08105	0.13942	0.694078	0.81305	0.261117	0.335126	0.998038	1.86102	0.257211	0.303703	0.0990424
1337	Regions/WT	3233.7	14382.2	0		0.92932	1.06336	0.139746	0.520207	0.882358	0.313582	0.365027	0.991261	1.9428	0.0355899	0.676181	0.123775
1338	Regions/WT	3313.7	14382.2	0		0.947948	1.00882	0.155652	0.603345	0.75285	0.181345	0.237004	0.980847	2.04744	0.262993	0.659503	0.16402
[truncated: 2,460 more rows]
