# Supplementary material for: Untargeted pixel-by-pixel metabolite ratio imaging as a novel tool for biomedical discovery in mass spectrometry imaging
Source: eLife. 2025 Mar 18;13:RP96892. doi: 10.7554/eLife.96892 (PMC11919253; doi:10.7554/eLife.96892)
Supplement: Figure 5—figure supplement 1—source data 1. [file elife-96892-fig5-figsupp1-data1.xlsx]

## Sheet: Figure S4 source data
spotId	raster	x	y	z	Date	Glutamate/Glutamine	FeCl2
0	0	3688	16226			3.00845	4128635
1	0	3768	16226			3.28734	4386466
2	0	3848	16226			3.18463	4570949
3	0	3928	16226			3.45271	4933516
4	0	4008	16226			2.88595	4577166
5	0	4088	16226			3.32522	4382960
6	0	4168	16226			3.64285	5243722
7	0	4248	16226			3.80558	5611404
8	0	4328	16226			4.13552	5091959
9	0	4408	16226			3.76372	6145115
10	0	4488	16226			3.33351	6147825
11	0	4568	16226			4.10594	7154707
12	0	4648	16226			4.12616	7211577
13	0	4728	16226			5.19244	4600003
14	0	4808	16226			2.73633	2897542
15	0	4888	16226			1.91804	1956725
16	0	4968	16226			4.23369	5160541
17	0	5048	16226			1.28521	3677331
18	0	5128	16226			3.2019	3624306
19	0	5208	16226			1.28503	759616
20	0	5288	16226			0.0140445	1116471
21	0	5368	16226			76.6374	3282898
22	0	5448	16226			1.28503	2179665
23	0	5528	16226			2.75397	3473130
24	0	5608	16226			2.30695	764738
25	0	5688	16226			1.28503	4149532
26	0	5768	16226			1.47868	6366717
27	0	5848	16226			1.28503	21479760
28	0	3208	16146			3.76509	5890963
29	0	3288	16146			3.88039	5846119
30	0	3368	16146			3.03521	5541250
31	0	3448	16146			3.4087	4543947
32	0	3528	16146			3.40431	4398317
33	0	3608	16146			3.67948	4167271
34	0	3688	16146			3.94867	7347291
35	0	3768	16146			3.19383	4628630
36	0	3848	16146			3.34865	4298632
37	0	3928	16146			3.46089	4294868
38	0	4008	16146			3.4229	4407984
39	0	4088	16146			3.57466	4232995
40	0	4168	16146			3.61244	4501542
41	0	4248	16146			3.11394	4655951
42	0	4328	16146			2.98387	4138553
43	0	4408	16146			3.71207	4379696
44	0	4488	16146			3.77527	5678653
45	0	4568	16146			3.7844	8204601
46	0	4648	16146			3.60499	9554140
47	0	4728	16146			3.56455	5904205
48	0	4808	16146			4.08093	6795511
49	0	4888	16146			3.21916	5644791
50	0	4968	16146			4.03512	5930656
51	0	5048	16146			3.3423	7578563
52	0	5128	16146			3.47354	8013468
53	0	5208	16146			3.21666	6558102
54	0	5288	16146			4.14756	6864373
55	0	5368	16146			3.00641	14901030
56	0	5448	16146			3.22392	8746874
57	0	5528	16146			3.29897	8845590
58	0	5608	16146			4.27878	8071455
59	0	5688	16146			3.46626	9953794
60	0	5768	16146			2.9788	7420966
61	0	5848	16146			3.37971	7595434
62	0	5928	16146			3.01571	6982539
63	0	6008	16146			2.34542	6673606
64	0	6088	16146			2.86994	6918651
65	0	6168	16146			155.608	2302338
66	0	6248	16146			0.0158129	2658642
67	0	6328	16146			67.3751	2694241
68	0	6408	16146			27.7243	4495769
69	0	2728	16066			2.16315	2709727
70	0	2808	16066			3.57135	5778696
71	0	2888	16066			3.97554	5462235
72	0	2968	16066			3.64604	5333980
73	0	3048	16066			3.57492	5157712
74	0	3128	16066			3.26313	4482003
75	0	3208	16066			3.68408	4380361
76	0	3288	16066			3.43437	4928924
77	0	3368	16066			3.47925	6342190
78	0	3448	16066			3.52401	4817591
79	0	3528	16066			3.50491	4154034
80	0	3608	16066			3.6636	4189085
81	0	3688	16066			3.3499	3836947
82	0	3768	16066			3.41837	3397432
83	0	3848	16066			3.00042	3908538
84	0	3928	16066			3.55136	4138207
85	0	4008	16066			3.76682	3861327
86	0	4088	16066			3.75887	3882082
87	0	4168	16066			3.71879	3991315
88	0	4248	16066			3.33329	4231081
89	0	4328	16066			3.39005	6214437
90	0	4408	16066			3.89676	5246211
91	0	4488	16066			3.25362	4213743
92	0	4568	16066			3.02738	5755734
93	0	4648	16066			2.91692	6563203
94	0	4728	16066			2.9526	6384217
95	0	4808	16066			3.38461	7927332
96	0	4888	16066			3.19751	6665388
97	0	4968	16066			3.5247	7261912
98	0	5048	16066			3.76609	7244762
99	0	5128	16066			3.90164	7327878
100	0	5208	16066			3.44077	6471656
101	0	5288	16066			2.94372	6806931
102	0	5368	16066			3.11408	7120799
103	0	5448	16066			3.98253	5140360
104	0	5528	16066			3.60862	4356282
105	0	5608	16066			3.58748	4953166
106	0	5688	16066			3.30037	5259759
107	0	5768	16066			2.80001	5829041
108	0	5848	16066			3.03056	6149380
109	0	5928	16066			2.97024	5838499
110	0	6008	16066			3.21828	6614507
111	0	6088	16066			4.74903	9965255
112	0	6168	16066			4.34205	9212563
113	0	6248	16066			4.15465	9190059
114	0	6328	16066			4.34273	8413639
115	0	6408	16066			3.6871	7921618
116	0	6488	16066			3.92966	7794991
117	0	6568	16066			3.4907	6290578
118	0	6648	16066			3.60615	5303864
119	0	6728	16066			3.17392	3936433
120	0	6808	16066			2.78905	5836328
121	0	6888	16066			3.40726	6548085
122	0	6968	16066			2.49485	3939894
123	0	2248	15986			5.13819	23489682
124	0	2328	15986			2.67693	6134983
125	0	2408	15986			3.3646	6374535
126	0	2488	15986			3.72692	4853929
127	0	2568	15986			3.39576	4939518
128	0	2648	15986			3.30838	5349503
129	0	2728	15986			3.50179	4259285
130	0	2808	15986			3.18098	4258294
131	0	2888	15986			3.93665	3836708
132	0	2968	15986			3.40853	2794029
133	0	3048	15986			4.27285	4259222
134	0	3128	15986			4.6161	4934770
135	0	3208	15986			3.91068	5291574
136	0	3288	15986			4.66207	4395661
137	0	3368	15986			4.07221	3682905
138	0	3448	15986			3.53198	4621816
139	0	3528	15986			3.5609	4498888
140	0	3608	15986			3.20899	3411542
141	0	3688	15986			3.95131	3746487
142	0	3768	15986			3.82823	2678087
143	0	3848	15986			3.743	3298545
144	0	3928	15986			4.50196	3202643
145	0	4008	15986			3.72055	2732701
146	0	4088	15986			3.97711	2717362
147	0	4168	15986			3.92959	3952734
148	0	4248	15986			3.63623	3422182
149	0	4328	15986			3.35314	2470668
150	0	4408	15986			3.62043	3248974
151	0	4488	15986			4.1221	4111739
152	0	4568	15986			3.58271	12388136
153	0	4648	15986			3.78984	6340279
154	0	4728	15986			4.26969	6141868
155	0	4808	15986			4.32693	4873682
156	0	4888	15986			4.07481	5467827
157	0	4968	15986			3.1728	8497263
158	0	5048	15986			3.45519	7265922
159	0	5128	15986			3.65401	4752411
160	0	5208	15986			3.27833	3460808
161	0	5288	15986			3.16427	3822705
162	0	5368	15986			4.16062	2687751
163	0	5448	15986			3.16862	3297285
164	0	5528	15986			3.55342	3508696
165	0	5608	15986			2.97994	6514095
166	0	5688	15986			3.92087	3771015
167	0	5768	15986			3.31739	3332040
168	0	5848	15986			3.18263	7323923
169	0	5928	15986			3.06837	4641043
170	0	6008	15986			4.59068	8176544
171	0	6088	15986			3.28044	7685313
172	0	6168	15986			3.38072	10431598
173	0	6248	15986			4.08491	6558932
174	0	6328	15986			3.14564	5872740
175	0	6408	15986			4.00008	6531256
176	0	6488	15986			3.94378	6758677
177	0	6568	15986			3.54504	5669409
178	0	6648	15986			2.60448	5213942
179	0	6728	15986			2.72339	5072065
180	0	6808	15986			3.47292	6342177
181	0	6888	15986			4.51082	6720862
182	0	6968	15986			2.87121	6838358
183	0	7048	15986			3.47191	4734431
184	0	7128	15986			3.39251	4604870
185	0	7208	15986			1.28503	1845730
186	0	1848	15906			2.32334	624255
187	0	1928	15906			3.17317	11377160
188	0	2008	15906			3.64737	8819946
189	0	2088	15906			4.10995	5015176
190	0	2168	15906			3.51587	8624745
191	0	2248	15906			3.04428	7410793
192	0	2328	15906			4.2239	6104438
193	0	2408	15906			3.35616	5550883
194	0	2488	15906			3.37182	4436170
195	0	2568	15906			3.6225	3628415
196	0	2648	15906			3.02822	1251837
197	0	2728	15906			4.10071	854306
198	0	2808	15906			3.42169	1882847
199	0	2888	15906			3.67843	2655756
200	0	2968	15906			3.67083	2823520
201	0	3048	15906			4.1214	3551012
202	0	3128	15906			3.84008	3637545
203	0	3208	15906			3.57066	3161466
204	0	3288	15906			3.54897	3745346
205	0	3368	15906			3.87606	4176531
206	0	3448	15906			3.46661	2617603
207	0	3528	15906			3.17157	6204732
208	0	3608	15906			3.37254	2001795
209	0	3688	15906			3.56514	2073039
210	0	3768	15906			3.81077	3311654
211	0	3848	15906			3.47316	3095973
212	0	3928	15906			3.47746	2742715
213	0	4008	15906			3.74411	2630527
214	0	4088	15906			3.41176	2409273
215	0	4168	15906			3.44789	2876625
216	0	4248	15906			4.37305	3404379
217	0	4328	15906			3.57436	8388664
218	0	4408	15906			3.90223	2267563
219	0	4488	15906			3.51657	3561584
220	0	4568	15906			3.95971	3306579
221	0	4648	15906			3.44311	4381418
222	0	4728	15906			4.08753	4807231
223	0	4808	15906			4.1286	4240402
224	0	4888	15906			3.65002	3929917
225	0	4968	15906			3.0145	4276883
226	0	5048	15906			2.97625	2691953
227	0	5128	15906			3.57594	2359966
228	0	5208	15906			3.54412	2771934
229	0	5288	15906			2.97681	2448089
230	0	5368	15906			4.04007	1710793
231	0	5448	15906			4.03324	1521458
232	0	5528	15906			3.36335	2175172
233	0	5608	15906			3.38912	2569540
234	0	5688	15906			2.99463	2841392
235	0	5768	15906			3.57792	3089404
236	0	5848	15906			4.19192	4550792
237	0	5928	15906			3.10708	4419508
238	0	6008	15906			3.44756	4487533
239	0	6088	15906			3.26516	5820547
240	0	6168	15906			3.59782	5704544
241	0	6248	15906			3.39539	5415910
242	0	6328	15906			3.54624	5759895
243	0	6408	15906			3.07203	5927087
244	0	6488	15906			2.84214	7254678
245	0	6568	15906			4.11243	7884918
246	0	6648	15906			3.70081	7673082
247	0	6728	15906			3.4027	10455930
248	0	6808	15906			3.22824	7992334
249	0	6888	15906			3.20781	6680213
250	0	6968	15906			3.71967	6763393
251	0	7048	15906			4.17293	7668285
252	0	7128	15906			3.44248	6713437
253	0	7208	15906			3.65802	11127011
254	0	7288	15906			4.50053	11430023
255	0	7368	15906			132.52	2687178
256	0	1688	15826			3.5211	6140722
257	0	1768	15826			3.74586	7299608
258	0	1848	15826			3.40084	9598390
259	0	1928	15826			2.5998	26126536
260	0	2008	15826			3.11885	11695621
261	0	2088	15826			4.34344	8003613
262	0	2168	15826			2.90738	5570308
263	0	2248	15826			3.35153	4507832
264	0	2328	15826			3.38455	6547390
265	0	2408	15826			4.1893	4188990
266	0	2488	15826			3.68495	3823266
267	0	2568	15826			3.46634	3808875
268	0	2648	15826			3.33193	1167855
269	0	2728	15826			3.30344	991975
270	0	2808	15826			3.6387	2005529
271	0	2888	15826			3.48887	2053117
272	0	2968	15826			4.11473	2402722
273	0	3048	15826			4.02954	3356661
274	0	3128	15826			3.99221	3145165
275	0	3208	15826			3.8483	1939964
276	0	3288	15826			4.39437	2133162
277	0	3368	15826			4.14645	3218660
278	0	3448	15826			4.02695	3057105
279	0	3528	15826			3.42308	3060409
280	0	3608	15826			3.79111	2144691
281	0	3688	15826			3.93568	1580355
282	0	3768	15826			3.68679	1670855
283	0	3848	15826			3.23566	2677718
284	0	3928	15826			3.77555	4224775
285	0	4008	15826			4.11369	2744644
286	0	4088	15826			3.66716	2674940
287	0	4168	15826			3.00281	1722301
288	0	4248	15826			3.3141	1681135
289	0	4328	15826			3.34528	1948617
290	0	4408	15826			3.97799	2427119
291	0	4488	15826			4.2276	2235151
292	0	4568	15826			3.57194	2992343
293	0	4648	15826			4.01812	2864992
294	0	4728	15826			3.22794	3721751
295	0	4808	15826			3.24467	3154862
296	0	4888	15826			3.89062	2558136
297	0	4968	15826			3.81214	3276883
298	0	5048	15826			3.8011	2614333
299	0	5128	15826			3.82887	1613601
300	0	5208	15826			3.19501	1732456
301	0	5288	15826			3.73782	1310047
302	0	5368	15826			3.84211	5208477
303	0	5448	15826			4.07431	1444548
304	0	5528	15826			3.90011	1263771
305	0	5608	15826			3.7834	1014612
306	0	5688	15826			4.49757	1907945
307	0	5768	15826			3.37836	4248883
308	0	5848	15826			4.18491	3267623
309	0	5928	15826			3.1369	3631478
310	0	6008	15826			4.40159	4834069
311	0	6088	15826			3.76748	3447763
312	0	6168	15826			3.86445	3683617
313	0	6248	15826			2.9428	5750221
314	0	6328	15826			4.41388	5929483
315	0	6408	15826			3.86386	6687791
316	0	6488	15826			3.72402	7355689
317	0	6568	15826			3.71184	6529168
318	0	6648	15826			3.2006	8023327
319	0	6728	15826			4.27592	10444589
320	0	6808	15826			3.96065	9158831
321	0	6888	15826			4.27768	8338996
322	0	6968	15826			4.46251	8664842
323	0	7048	15826			3.14706	6352848
324	0	7128	15826			3.52925	6067175
325	0	7208	15826			3.96984	5657582
326	0	7288	15826			3.55488	4704323
327	0	7368	15826			3.11638	6129183
328	0	7448	15826			3.55929	6505979
329	0	1608	15746			3.38354	7356006
330	0	1688	15746			2.90701	7782416
331	0	1768	15746			3.65952	7207378
332	0	1848	15746			3.07973	9401589
333	0	1928	15746			2.73588	13574375
334	0	2008	15746			2.87416	6582377
335	0	2088	15746			3.24569	7032415
336	0	2168	15746			3.34505	5342090
337	0	2248	15746			3.33915	3211723
338	0	2328	15746			3.38039	2937027
339	0	2408	15746			4.05613	2972671
340	0	2488	15746			3.28409	4083088
341	0	2568	15746			3.08519	3071826
342	0	2648	15746			3.69171	763629
343	0	2728	15746			3.62928	1263573
344	0	2808	15746			3.68494	1269190
345	0	2888	15746			3.05481	1401981
346	0	2968	15746			4.42957	2471370
347	0	3048	15746			3.78211	2558201
348	0	3128	15746			3.47228	1930687
349	0	3208	15746			3.62578	1660004
350	0	3288	15746			3.56064	1718199
351	0	3368	15746			3.98532	1766921
352	0	3448	15746			3.50488	3133742
353	0	3528	15746			3.97645	4013707
354	0	3608	15746			3.5353	1673218
355	0	3688	15746			3.9103	1463508
356	0	3768	15746			3.91451	2162702
357	0	3848	15746			3.57408	2408395
358	0	3928	15746			3.98127	2069030
359	0	4008	15746			4.13871	1774724
360	0	4088	15746			3.90949	1567914
361	0	4168	15746			3.25606	1122384
362	0	4248	15746			3.07832	2167236
363	0	4328	15746			3.72934	1223071
364	0	4408	15746			3.65199	1719550
365	0	4488	15746			3.54849	1748701
366	0	4568	15746			3.33967	2097311
367	0	4648	15746			3.42203	2088302
368	0	4728	15746			3.71876	2408076
369	0	4808	15746			3.50587	2393007
370	0	4888	15746			4.41268	2272354
371	0	4968	15746			3.44814	2990489
372	0	5048	15746			4.15113	2948807
373	0	5128	15746			4.20484	2005836
374	0	5208	15746			3.94672	2227569
375	0	5288	15746			3.60046	1468613
376	0	5368	15746			3.52447	1464287
377	0	5448	15746			3.6559	1812971
378	0	5528	15746			3.10279	1243120
379	0	5608	15746			3.06353	1334253
380	0	5688	15746			4.14247	1479094
381	0	5768	15746			3.35334	1313835
382	0	5848	15746			4.1758	2182070
383	0	5928	15746			3.58695	2567819
384	0	6008	15746			2.69508	2903827
385	0	6088	15746			3.98842	2866962
386	0	6168	15746			3.54144	3188075
387	0	6248	15746			3.08232	3697732
388	0	6328	15746			2.6991	3796624
389	0	6408	15746			3.41556	4747358
390	0	6488	15746			3.69252	4802679
391	0	6568	15746			4.3944	5516961
392	0	6648	15746			3.0774	9267471
393	0	6728	15746			3.33495	22700482
394	0	6808	15746			4.27243	7156656
395	0	6888	15746			3.57518	7285789
396	0	6968	15746			3.67454	7470805
397	0	7048	15746			3.76963	7073700
398	0	7128	15746			4.14374	4737055
399	0	7208	15746			2.58179	5473220
400	0	7288	15746			4.22525	5280721
401	0	7368	15746			4.24612	5332113
402	0	7448	15746			3.88134	7096206
403	0	7528	15746			3.52197	8173460
404	0	7608	15746			3.46371	6490573
405	0	1528	15666			2.61144	9113100
406	0	1608	15666			3.56854	6717212
407	0	1688	15666			3.36855	7927941
408	0	1768	15666			4.12504	5918753
409	0	1848	15666			3.44854	5837626
410	0	1928	15666			3.58141	5177726
411	0	2008	15666			3.76366	3603709
412	0	2088	15666			2.77085	4120265
413	0	2168	15666			3.95251	3934291
414	0	2248	15666			3.4992	2576125
415	0	2328	15666			3.52479	3396255
416	0	2408	15666			3.42287	3537603
417	0	2488	15666			3.25946	3018157
418	0	2568	15666			3.81191	1506142
419	0	2648	15666			3.69561	218806
420	0	2728	15666			4.12734	137642
421	0	2808	15666			3.65348	1758737
422	0	2888	15666			3.54894	2019585
423	0	2968	15666			3.26021	2491345
424	0	3048	15666			3.21108	1761180
425	0	3128	15666			3.9673	2202293
426	0	3208	15666			3.46465	1553952
427	0	3288	15666			3.53243	1800792
428	0	3368	15666			3.48865	1590175
429	0	3448	15666			3.71033	1855175
430	0	3528	15666			3.63894	1390582
431	0	3608	15666			3.40266	1629968
432	0	3688	15666			4.04271	1828100
433	0	3768	15666			3.28569	2445839
434	0	3848	15666			3.39574	1626687
435	0	3928	15666			3.90322	1443735
436	0	4008	15666			2.94558	1698275
437	0	4088	15666			3.81611	7492814
438	0	4168	15666			3.68856	2776159
439	0	4248	15666			2.97815	1368741
440	0	4328	15666			3.33695	1369362
441	0	4408	15666			3.66866	1076346
442	0	4488	15666			3.28012	1432224
443	0	4568	15666			3.2985	1443373
444	0	4648	15666			3.2931	3261573
445	0	4728	15666			4.19161	2407927
446	0	4808	15666			3.23221	2163546
447	0	4888	15666			3.65681	1877825
448	0	4968	15666			3.79398	2085868
449	0	5048	15666			3.53665	2738174
450	0	5128	15666			3.35482	3347215
451	0	5208	15666			3.09364	1732756
452	0	5288	15666			3.33159	1723617
453	0	5368	15666			3.60843	2081445
454	0	5448	15666			3.72357	1494168
455	0	5528	15666			3.59242	3856343
456	0	5608	15666			3.54532	1899467
457	0	5688	15666			3.30909	1824249
458	0	5768	15666			3.63312	1430731
459	0	5848	15666			3.51792	1648570
460	0	5928	15666			3.76426	1829445
461	0	6008	15666			3.2161	3344917
462	0	6088	15666			3.74539	2692559
463	0	6168	15666			3.59116	3140742
464	0	6248	15666			3.33293	1556311
465	0	6328	15666			3.49714	110733
466	0	6408	15666			3.30623	2611738
467	0	6488	15666			3.62336	4073974
468	0	6568	15666			3.8513	4119376
469	0	6648	15666			3.37638	5223449
470	0	6728	15666			3.30599	4140502
471	0	6808	15666			3.365	4202617
472	0	6888	15666			3.72724	5559548
473	0	6968	15666			3.87314	7111067
474	0	7048	15666			3.9296	5466579
475	0	7128	15666			3.71116	5696685
476	0	7208	15666			3.20858	4828216
477	0	7288	15666			3.5131	6838417
478	0	7368	15666			4.54966	6009143
479	0	7448	15666			3.48196	7458774
480	0	7528	15666			3.97444	6233075
481	0	7608	15666			3.6188	5460177
482	0	7688	15666			3.67444	5840283
483	0	7768	15666			4.17859	8089900
484	0	1528	15586			2.29225	5721677
485	0	1608	15586			2.96971	5734453
486	0	1688	15586			3.15604	6994758
487	0	1768	15586			3.91279	4266477
488	0	1848	15586			3.46662	3677134
489	0	1928	15586			3.41627	3012984
490	0	2008	15586			3.82317	2731522
491	0	2088	15586			3.46757	2237346
492	0	2168	15586			4.25329	2909255
493	0	2248	15586			3.27278	3150146
494	0	2328	15586			3.39883	4097254
495	0	2408	15586			3.16889	6089762
496	0	2488	15586			3.4018	5791918
497	0	2568	15586			3.81018	1687450
498	0	2648	15586			3.56906	1099676
499	0	2728	15586			3.55297	1031341
500	0	2808	15586			3.67536	1513005
501	0	2888	15586			3.70493	1550424
502	0	2968	15586			3.68336	1534366
503	0	3048	15586			3.89928	1558167
504	0	3128	15586			3.36194	2291883
505	0	3208	15586			3.95874	2281538
506	0	3288	15586			3.55382	1399111
507	0	3368	15586			2.83844	1708032
508	0	3448	15586			3.25284	2381825
509	0	3528	15586			3.02545	2355313
510	0	3608	15586			3.83294	1631620
511	0	3688	15586			3.33906	1370026
512	0	3768	15586			4.01133	1428722
513	0	3848	15586			3.51861	1227818
514	0	3928	15586			3.35774	1250272
515	0	4008	15586			3.65114	1469966
516	0	4088	15586			4.15317	3738060
517	0	4168	15586			3.07324	1481062
518	0	4248	15586			3.28379	1241478
519	0	4328	15586			3.3997	1225176
520	0	4408	15586			3.60453	2655278
521	0	4488	15586			3.80435	1683900
522	0	4568	15586			3.51659	1788426
523	0	4648	15586			3.64383	2268739
524	0	4728	15586			3.94922	1651419
525	0	4808	15586			3.41328	2171470
526	0	4888	15586			3.86071	2395566
527	0	4968	15586			4.05467	2589091
528	0	5048	15586			3.48502	1703349
529	0	5128	15586			3.6223	1569288
530	0	5208	15586			3.36936	1461120
531	0	5288	15586			3.2332	13428370
532	0	5368	15586			3.00061	1072368
533	0	5448	15586			2.99267	1584250
534	0	5528	15586			3.33592	1463238
535	0	5608	15586			3.56626	1733646
536	0	5688	15586			3.1279	1484290
537	0	5768	15586			3.10326	2017256
538	0	5848	15586			3.33916	1518041
539	0	5928	15586			3.6007	2236261
540	0	6008	15586			2.87755	4426137
541	0	6088	15586			3.65459	2723190
542	0	6168	15586			3.25514	2851139
543	0	6248	15586			3.26796	1595917
544	0	6328	15586			3.9037	1290454
545	0	6408	15586			3.26959	3592231
546	0	6488	15586			3.86888	4029789
547	0	6568	15586			4.10832	2921464
548	0	6648	15586			4.11961	5599513
549	0	6728	15586			3.41301	4335987
550	0	6808	15586			3.1715	4063195
551	0	6888	15586			3.55399	4703047
552	0	6968	15586			3.45819	4193760
553	0	7048	15586			4.42522	4123472
554	0	7128	15586			3.44866	4925057
555	0	7208	15586			3.89229	4412807
556	0	7288	15586			4.24533	4614878
557	0	7368	15586			3.32148	7063026
558	0	7448	15586			4.05617	4037397
559	0	7528	15586			3.57065	5142856
560	0	7608	15586			3.66625	4419385
561	0	7688	15586			4.1019	6058867
562	0	7768	15586			3.67655	8385055
563	0	7848	15586			3.58492	9743204
564	0	1448	15506			2.9215	6174196
565	0	1528	15506			3.52889	10030814
566	0	1608	15506			3.64119	3900709
567	0	1688	15506			3.27418	3495424
568	0	1768	15506			3.80754	2608048
569	0	1848	15506			4.38299	3388732
570	0	1928	15506			3.06571	2940056
571	0	2008	15506			4.01438	2588584
572	0	2088	15506			3.36312	2799838
573	0	2168	15506			3.41651	2144121
574	0	2248	15506			3.30755	1704334
575	0	2328	15506			3.2145	3525351
576	0	2408	15506			4.22516	13300863
577	0	2488	15506			4.50185	13021271
578	0	2568	15506			3.36067	3285666
579	0	2648	15506			3.31538	1739580
580	0	2728	15506			3.28765	1075727
581	0	2808	15506			3.34729	1199593
582	0	2888	15506			3.6903	1472374
583	0	2968	15506			3.27056	2919685
584	0	3048	15506			3.63882	1773155
585	0	3128	15506			3.68634	1533742
586	0	3208	15506			3.20338	1379666
587	0	3288	15506			3.16045	1479581
588	0	3368	15506			3.11514	1842877
589	0	3448	15506			3.5398	1715985
590	0	3528	15506			3.49196	2046093
591	0	3608	15506			3.10507	1426464
592	0	3688	15506			3.70736	1021296
593	0	3768	15506			2.82197	1366911
594	0	3848	15506			4.13034	5053914
595	0	3928	15506			3.54468	5529306
596	0	4008	15506			3.16342	1010848
597	0	4088	15506			3.47326	1193102
598	0	4168	15506			3.34721	1231205
599	0	4248	15506			3.97182	1583079
600	0	4328	15506			3.47435	1294733
601	0	4408	15506			3.55077	1672494
602	0	4488	15506			3.50595	1779108
603	0	4568	15506			3.48539	2605877
604	0	4648	15506			3.29984	2009180
605	0	4728	15506			3.71989	2078820
606	0	4808	15506			3.23254	1962596
607	0	4888	15506			3.73542	1832207
608	0	4968	15506			3.33358	1953089
609	0	5048	15506			4.01563	1572239
610	0	5128	15506			3.69108	1454430
611	0	5208	15506			4.08343	1437906
612	0	5288	15506			3.72493	1838789
613	0	5368	15506			3.58006	4486281
614	0	5448	15506			3.73422	1103815
615	0	5528	15506			3.86936	983663
616	0	5608	15506			3.40026	1170740
617	0	5688	15506			4.20063	1497344
618	0	5768	15506			3.63484	1445818
619	0	5848	15506			3.45113	1968502
620	0	5928	15506			3.90962	3189716
621	0	6008	15506			3.20592	3105646
622	0	6088	15506			3.06185	4478754
623	0	6168	15506			4.31833	3467261
624	0	6248	15506			3.55579	2517181
625	0	6328	15506			3.46308	3106833
626	0	6408	15506			3.31333	4680875
627	0	6488	15506			3.56375	3549085
628	0	6568	15506			3.66156	2682796
629	0	6648	15506			3.33285	3469090
630	0	6728	15506			3.86462	4104706
631	0	6808	15506			3.975	8477620
632	0	6888	15506			3.97054	3815925
633	0	6968	15506			4.09223	3244766
634	0	7048	15506			3.20626	3816582
635	0	7128	15506			3.5207	4295279
636	0	7208	15506			3.9599	3721939
637	0	7288	15506			3.71728	3182825
638	0	7368	15506			4.09688	3601398
639	0	7448	15506			4.14795	2421803
640	0	7528	15506			2.63616	3339618
641	0	7608	15506			3.46987	5993707
642	0	7688	15506			4.00698	5338660
643	0	7768	15506			3.93939	6805834
644	0	7848	15506			2.96457	8584913
645	0	7928	15506			4.28425	8570236
646	0	8008	15506			3.62761	10317018
647	0	1368	15426			4.17597	5727903
648	0	1448	15426			3.73492	5120129
649	0	1528	15426			3.02023	4301540
650	0	1608	15426			3.58743	5427489
651	0	1688	15426			3.34904	4080343
652	0	1768	15426			3.85329	3590591
653	0	1848	15426			3.50543	6235269
654	0	1928	15426			3.67107	7401858
655	0	2008	15426			3.57383	13530840
656	0	2088	15426			3.72322	2825248
657	0	2168	15426			3.124	1927324
658	0	2248	15426			3.68447	1646085
659	0	2328	15426			3.10216	3777440
660	0	2408	15426			3.32973	7081067
661	0	2488	15426			4.37369	9440533
662	0	2568	15426			4.00845	5001350
663	0	2648	15426			3.44713	2515425
664	0	2728	15426			3.15226	1458190
665	0	2808	15426			3.064	1560017
666	0	2888	15426			2.85273	2833220
667	0	2968	15426			3.71557	2792108
668	0	3048	15426			3.18747	2746466
669	0	3128	15426			3.23986	1367796
670	0	3208	15426			3.3129	1390740
671	0	3288	15426			2.78781	940138
672	0	3368	15426			3.20465	1160635
673	0	3448	15426			3.2194	1150019
674	0	3528	15426			3.44735	3309082
675	0	3608	15426			3.37678	1485240
676	0	3688	15426			3.01334	1196140
677	0	3768	15426			3.49004	4397193
678	0	3848	15426			2.93086	1164319
679	0	3928	15426			3.12327	2109693
680	0	4008	15426			3.32796	1159632
681	0	4088	15426			3.189	1411563
682	0	4168	15426			3.23523	1443434
683	0	4248	15426			3.00142	1070249
684	0	4328	15426			3.21237	1674336
685	0	4408	15426			3.41645	3528383
686	0	4488	15426			3.86911	2031291
687	0	4568	15426			3.46445	9979502
688	0	4648	15426			3.56036	1975583
689	0	4728	15426			3.30538	2008693
690	0	4808	15426			3.73109	1930168
691	0	4888	15426			3.55215	2078434
692	0	4968	15426			3.19018	1823954
693	0	5048	15426			3.89743	1846762
694	0	5128	15426			3.07885	1019242
695	0	5208	15426			3.55385	1036836
696	0	5288	15426			3.17612	1155250
697	0	5368	15426			3.43021	1839003
698	0	5448	15426			3.4778	1045389
699	0	5528	15426			2.95319	1500934
700	0	5608	15426			2.78895	1127058
701	0	5688	15426			2.96561	1306512
702	0	5768	15426			3.67802	8422794
703	0	5848	15426			3.47495	4019183
704	0	5928	15426			3.58629	2759779
705	0	6008	15426			3.37857	6357849
706	0	6088	15426			3.5537	4416550
707	0	6168	15426			3.87743	3815726
708	0	6248	15426			3.81469	3988300
709	0	6328	15426			3.68217	4706569
710	0	6408	15426			3.89653	4333282
711	0	6488	15426			4.04099	9227479
712	0	6568	15426			3.29108	3237283
713	0	6648	15426			3.33203	3229131
714	0	6728	15426			3.67871	3019768
715	0	6808	15426			3.5179	4700798
716	0	6888	15426			4.00638	3115135
717	0	6968	15426			4.20583	2273680
718	0	7048	15426			4.24204	2826764
719	0	7128	15426			3.4517	3414045
720	0	7208	15426			3.84811	2058579
721	0	7288	15426			3.68735	2556044
722	0	7368	15426			3.96143	3362856
723	0	7448	15426			3.52324	2726535
724	0	7528	15426			3.94284	2701934
725	0	7608	15426			3.63025	4032208
726	0	7688	15426			3.0007	4256159
727	0	7768	15426			3.8905	5188704
728	0	7848	15426			3.51152	5692098
729	0	7928	15426			4.07868	8707587
730	0	8008	15426			3.2592	15081474
731	0	8088	15426			3.72763	9473480
732	0	8168	15426			4.50005	12352744
733	0	1288	15346			3.37211	6412206
734	0	1368	15346			3.57188	6843594
735	0	1448	15346			4.20738	5303726
736	0	1528	15346			3.33532	4800146
737	0	1608	15346			4.02518	7233510
738	0	1688	15346			4.05792	3997345
739	0	1768	15346			3.82951	4256049
740	0	1848	15346			3.35125	5782713
741	0	1928	15346			3.38196	3682384
742	0	2008	15346			3.23822	2442113
743	0	2088	15346			3.6337	1384951
744	0	2168	15346			3.48499	2265298
745	0	2248	15346			4.1295	2022285
746	0	2328	15346			3.2172	2155360
747	0	2408	15346			3.39175	4852333
748	0	2488	15346			3.19678	4571886
749	0	2568	15346			3.16719	3883480
750	0	2648	15346			3.135	2297696
751	0	2728	15346			2.94006	1584014
752	0	2808	15346			3.4212	2037237
753	0	2888	15346			3.06959	2255608
754	0	2968	15346			3.41217	1545484
755	0	3048	15346			3.05341	1101641
756	0	3128	15346			3.01198	823345
757	0	3208	15346			2.67982	1721087
758	0	3288	15346			2.93273	1287755
759	0	3368	15346			2.95772	1122505
760	0	3448	15346			3.69221	1107815
761	0	3528	15346			3.03043	1419927
762	0	3608	15346			3.54619	6706654
763	0	3688	15346			2.95972	1002818
764	0	3768	15346			3.23012	1142343
765	0	3848	15346			2.98203	1219855
766	0	3928	15346			3.50649	1025241
767	0	4008	15346			3.65092	990115
768	0	4088	15346			3.18219	746808
769	0	4168	15346			3.61257	1021515
770	0	4248	15346			3.94118	1759031
771	0	4328	15346			3.06124	1710560
772	0	4408	15346			3.93397	2634714
773	0	4488	15346			3.35007	1815921
774	0	4568	15346			3.61649	1859047
775	0	4648	15346			2.98494	1713532
776	0	4728	15346			3.56591	1722331
777	0	4808	15346			3.30277	1963361
778	0	4888	15346			3.36902	1269518
779	0	4968	15346			3.57224	1681825
780	0	5048	15346			3.51115	1412565
781	0	5128	15346			3.72078	1057606
782	0	5208	15346			3.04636	1534320
783	0	5288	15346			3.2598	1434261
784	0	5368	15346			2.78903	1664823
785	0	5448	15346			3.87602	635566
786	0	5528	15346			3.9963	1805140
787	0	5608	15346			2.98071	1155137
788	0	5688	15346			3.4261	2017664
789	0	5768	15346			3.42764	2753090
790	0	5848	15346			3.97164	2359854
791	0	5928	15346			3.1543	2451125
792	0	6008	15346			3.71371	6092985
793	0	6088	15346			3.8655	4536984
794	0	6168	15346			3.35739	4344057
795	0	6248	15346			3.61157	5130975
796	0	6328	15346			3.12705	3909794
797	0	6408	15346			3.33375	2710407
798	0	6488	15346			3.31418	3071879
799	0	6568	15346			3.64542	3052200
800	0	6648	15346			3.70781	3015634
801	0	6728	15346			3.50181	3188555
802	0	6808	15346			3.53549	3119491
803	0	6888	15346			4.07872	2988438
804	0	6968	15346			3.90172	2549054
805	0	7048	15346			3.64458	3092077
806	0	7128	15346			3.97488	1947992
807	0	7208	15346			3.49045	2433746
808	0	7288	15346			3.49831	1979286
809	0	7368	15346			3.70432	3165231
810	0	7448	15346			3.68167	2012929
811	0	7528	15346			3.57274	2305944
812	0	7608	15346			3.73557	3377622
813	0	7688	15346			4.59926	2907239
814	0	7768	15346			4.02641	3285156
815	0	7848	15346			3.55301	4948452
816	0	7928	15346			3.69869	8147291
817	0	8008	15346			3.35169	8908957
818	0	8088	15346			3.76473	9560622
819	0	8168	15346			3.43672	10572814
820	0	8248	15346			3.91737	8892022
821	0	1208	15266			3.21873	5247616
822	0	1288	15266			3.48828	6948513
823	0	1368	15266			3.62984	5565728
824	0	1448	15266			3.16574	4712836
825	0	1528	15266			3.14365	12146004
826	0	1608	15266			3.42546	10221052
827	0	1688	15266			4.18085	9309008
828	0	1768	15266			4.18467	7484174
829	0	1848	15266			4.06146	3566156
830	0	1928	15266			3.2687	2887492
831	0	2008	15266			3.51366	11749686
832	0	2088	15266			3.31423	1503122
833	0	2168	15266			3.94825	1722007
834	0	2248	15266			3.42534	2787171
835	0	2328	15266			3.32462	2319153
836	0	2408	15266			3.2155	4304956
837	0	2488	15266			3.0867	4641499
838	0	2568	15266			3.0442	2100142
839	0	2648	15266			3.43237	2098267
840	0	2728	15266			2.96805	3804597
841	0	2808	15266			2.95747	1865483
842	0	2888	15266			2.54544	1074548
843	0	2968	15266			2.97901	1661977
844	0	3048	15266			2.54359	1167757
845	0	3128	15266			3.31469	1501045
846	0	3208	15266			3.22635	1143591
847	0	3288	15266			3.22157	1731850
848	0	3368	15266			3.01413	949524
849	0	3448	15266			3.03201	1100659
850	0	3528	15266			2.9805	948579
851	0	3608	15266			2.86683	1871094
852	0	3688	15266			3.31325	1265616
853	0	3768	15266			3.59192	5913608
854	0	3848	15266			2.95836	1162747
855	0	3928	15266			3.39492	1085029
856	0	4008	15266			2.61735	1096129
857	0	4088	15266			3.59726	1385007
858	0	4168	15266			3.128	1079870
859	0	4248	15266			2.92413	887920
860	0	4328	15266			3.27703	1113868
861	0	4408	15266			3.32152	1422662
862	0	4488	15266			3.65031	1607968
863	0	4568	15266			3.45979	1851878
864	0	4648	15266			3.68628	2266940
865	0	4728	15266			3.66719	1657207
866	0	4808	15266			3.28529	4543970
867	0	4888	15266			3.33737	1666982
868	0	4968	15266			3.19137	1810129
869	0	5048	15266			2.99984	1515105
870	0	5128	15266			3.52791	1287133
871	0	5208	15266			2.95111	1093810
872	0	5288	15266			3.12429	930454
873	0	5368	15266			3.27087	878611
874	0	5448	15266			2.99726	1732128
875	0	5528	15266			3.01773	1401640
876	0	5608	15266			2.81711	1236731
877	0	5688	15266			3.09233	1177819
878	0	5768	15266			2.93795	2448002
879	0	5848	15266			3.98384	2352553
880	0	5928	15266			3.61766	5940723
881	0	6008	15266			3.23008	5496040
882	0	6088	15266			3.10805	4424362
883	0	6168	15266			3.24848	3426816
884	0	6248	15266			3.29063	2549556
885	0	6328	15266			3.35164	4303674
886	0	6408	15266			3.40902	2994759
887	0	6488	15266			3.58281	2817401
888	0	6568	15266			3.08825	2974436
889	0	6648	15266			3.38139	2583011
890	0	6728	15266			3.62088	2841460
891	0	6808	15266			3.25968	2130670
892	0	6888	15266			3.32576	2201572
893	0	6968	15266			3.5347	2117397
894	0	7048	15266			3.8649	2548908
895	0	7128	15266			3.45058	1964109
896	0	7208	15266			3.37819	2215022
897	0	7288	15266			3.38061	1629400
898	0	7368	15266			3.9565	2272084
899	0	7448	15266			3.97828	2703382
900	0	7528	15266			4.24432	3696339
901	0	7608	15266			3.86641	1853338
902	0	7688	15266			3.71886	1992376
903	0	7768	15266			3.67978	2488407
904	0	7848	15266			3.4388	4921574
905	0	7928	15266			3.98826	11036815
906	0	8008	15266			3.4594	6194345
907	0	8088	15266			3.83723	5646249
908	0	8168	15266			3.85377	5487522
909	0	8248	15266			3.80791	5650279
910	0	8328	15266			3.54306	7575178
911	0	8408	15266			4.01901	8936042
912	0	1208	15186			3.51996	7176938
913	0	1288	15186			3.16074	10712769
914	0	1368	15186			3.48446	11536766
915	0	1448	15186			3.98636	8247455
916	0	1528	15186			3.21435	7401342
917	0	1608	15186			3.67638	12203724
918	0	1688	15186			3.35012	6827286
919	0	1768	15186			3.75092	5781944
920	0	1848	15186			3.07416	9265589
921	0	1928	15186			3.89556	2444126
922	0	2008	15186			3.36271	2952319
923	0	2088	15186			3.32093	1960265
924	0	2168	15186			3.57398	2305272
925	0	2248	15186			3.80284	1396318
926	0	2328	15186			3.46341	3635383
927	0	2408	15186			2.90807	3112969
928	0	2488	15186			2.68163	2253875
929	0	2568	15186			2.88089	1538902
930	0	2648	15186			2.71623	1801499
931	0	2728	15186			3.03235	1585139
932	0	2808	15186			3.02701	832397
933	0	2888	15186			2.94566	1202750
934	0	2968	15186			2.73088	935044
935	0	3048	15186			3.12794	1235979
936	0	3128	15186			2.51994	1646962
937	0	3208	15186			2.87202	1867310
938	0	3288	15186			2.67784	1620049
939	0	3368	15186			2.77008	1719742
940	0	3448	15186			2.82475	1685567
941	0	3528	15186			3.20541	1767198
942	0	3608	15186			3.39345	1716410
943	0	3688	15186			2.80054	3024052
944	0	3768	15186			2.99941	1647759
945	0	3848	15186			2.65709	1422760
946	0	3928	15186			3.45805	5544995
947	0	4008	15186			2.89693	2373986
948	0	4088	15186			3.275	1238090
949	0	4168	15186			2.7977	1002461
950	0	4248	15186			2.72073	1348890
951	0	4328	15186			2.73166	1135163
952	0	4408	15186			3.19958	1499072
953	0	4488	15186			3.8916	639826
954	0	4568	15186			3.29742	1811854
955	0	4648	15186			3.48871	1436828
956	0	4728	15186			3.10582	1578309
957	0	4808	15186			3.19857	1576220
958	0	4888	15186			3.51356	1270580
959	0	4968	15186			2.87783	1527945
960	0	5048	15186			3.35353	1359455
961	0	5128	15186			3.07954	1074763
962	0	5208	15186			3.22775	1084781
963	0	5288	15186			3.34953	734047
964	0	5368	15186			2.97463	910217
965	0	5448	15186			2.80868	1456304
966	0	5528	15186			3.11602	4650982
967	0	5608	15186			3.27212	2235308
968	0	5688	15186			3.32795	2242371
969	0	5768	15186			2.9595	1672530
970	0	5848	15186			3.06296	4317504
971	0	5928	15186			3.27875	2281203
972	0	6008	15186			3.25105	2964928
973	0	6088	15186			3.3927	2475345
974	0	6168	15186			3.48466	2056456
975	0	6248	15186			3.50443	1945390
976	0	6328	15186			3.08867	1286640
977	0	6408	15186			3.65782	2151371
978	0	6488	15186			3.36455	2835403
979	0	6568	15186			3.49941	4779335
980	0	6648	15186			3.2779	3363387
981	0	6728	15186			3.51124	2459386
982	0	6808	15186			3.21541	2238728
983	0	6888	15186			4.05558	1776124
984	0	6968	15186			3.18215	1650487
985	0	7048	15186			3.80724	2049632
986	0	7128	15186			3.33475	2638607
987	0	7208	15186			3.12537	2952851
988	0	7288	15186			3.38397	1543080
989	0	7368	15186			4.13141	1702073
990	0	7448	15186			3.68643	2726065
991	0	7528	15186			3.47362	2320172
992	0	7608	15186			3.94573	1618850
993	0	7688	15186			3.4758	1785505
994	0	7768	15186			3.25288	2450987
995	0	7848	15186			3.8013	2966746
996	0	7928	15186			3.76199	3291125
997	0	8008	15186			3.78475	3633247
998	0	8088	15186			3.73493	3962446
999	0	8168	15186			3.18254	4297018
1000	0	8248	15186			3.48351	4988594
1001	0	8328	15186			3.48345	8808587
1002	0	8408	15186			3.81387	8900503
1003	0	8488	15186			3.23444	6388749
1004	0	1128	15106			3.02226	14107367
1005	0	1208	15106			2.8123	4906530
1006	0	1288	15106			3.18819	6869865
1007	0	1368	15106			3.06942	15149208
1008	0	1448	15106			4.53411	3168204
1009	0	1528	15106			4.26485	5635770
1010	0	1608	15106			3.67409	5223083
1011	0	1688	15106			3.16924	5129028
1012	0	1768	15106			3.52464	5243107
1013	0	1848	15106			3.03518	13000362
1014	0	1928	15106			3.07915	3318808
1015	0	2008	15106			3.65567	1990380
1016	0	2088	15106			2.81767	660798
1017	0	2168	15106			2.95944	1472614
1018	0	2248	15106			2.90892	1489352
1019	0	2328	15106			3.82607	1872487
1020	0	2408	15106			2.94202	1764848
1021	0	2488	15106			3.31497	2259600
1022	0	2568	15106			3.40678	689621
1023	0	2648	15106			2.58121	872864
1024	0	2728	15106			2.89731	1164953
1025	0	2808	15106			2.69363	734241
1026	0	2888	15106			2.72023	713848
1027	0	2968	15106			2.94956	1318545
1028	0	3048	15106			3.14229	1069270
1029	0	3128	15106			3.06104	1672641
1030	0	3208	15106			2.77566	1537714
1031	0	3288	15106			2.66461	2838272
1032	0	3368	15106			3.01231	4639615
1033	0	3448	15106			3.44319	5713041
1034	0	3528	15106			2.83916	6149699
1035	0	3608	15106			3.12641	6046026
1036	0	3688	15106			2.79842	6125615
1037	0	3768	15106			3.0011	4278238
1038	0	3848	15106			3.27156	2372780
1039	0	3928	15106			2.86185	2375793
1040	0	4008	15106			3.11064	2593430
1041	0	4088	15106			3.4727	2014938
1042	0	4168	15106			2.82845	2360414
1043	0	4248	15106			3.25597	4443014
1044	0	4328	15106			2.80975	1019057
1045	0	4408	15106			2.50463	998030
1046	0	4488	15106			2.65642	969088
1047	0	4568	15106			3.31094	816940
1048	0	4648	15106			3.70845	4464704
1049	0	4728	15106			3.14056	1136457
1050	0	4808	15106			3.03958	2283526
1051	0	4888	15106			3.0845	1490347
1052	0	4968	15106			3.0467	812050
1053	0	5048	15106			3.34448	705784
1054	0	5128	15106			2.9651	1225834
1055	0	5208	15106			2.57334	1310751
1056	0	5288	15106			3.0663	1296486
1057	0	5368	15106			3.48832	1004348
1058	0	5448	15106			2.78516	1158701
1059	0	5528	15106			3.12016	2113697
1060	0	5608	15106			3.12361	1221455
1061	0	5688	15106			2.96366	1261139
1062	0	5768	15106			2.87336	2537767
1063	0	5848	15106			2.70692	1805168
1064	0	5928	15106			3.20508	1789798
1065	0	6008	15106			3.14385	1654774
1066	0	6088	15106			3.09581	1808656
1067	0	6168	15106			3.01499	1384384
1068	0	6248	15106			2.54166	1102431
1069	0	6328	15106			2.63823	1361538
1070	0	6408	15106			3.24957	1681089
1071	0	6488	15106			2.95564	1892838
1072	0	6568	15106			3.31222	2246082
1073	0	6648	15106			3.56099	2071220
1074	0	6728	15106			3.2769	1965463
1075	0	6808	15106			3.92367	1766153
1076	0	6888	15106			3.38524	1234399
1077	0	6968	15106			3.38223	1419228
1078	0	7048	15106			3.19377	1880539
1079	0	7128	15106			3.56759	2215267
1080	0	7208	15106			3.57045	1970868
1081	0	7288	15106			3.49161	1639338
1082	0	7368	15106			3.48061	2630727
1083	0	7448	15106			3.70021	11308785
1084	0	7528	15106			3.34537	2856574
1085	0	7608	15106			3.83876	1595971
1086	0	7688	15106			3.98213	1801934
1087	0	7768	15106			3.27223	1295467
1088	0	7848	15106			3.35125	1940399
1089	0	7928	15106			3.49759	2159088
1090	0	8008	15106			3.62442	3372269
1091	0	8088	15106			3.85855	2334274
1092	0	8168	15106			3.91226	3708376
1093	0	8248	15106			3.02506	3921788
1094	0	8328	15106			4.9086	9075145
1095	0	8408	15106			3.83386	10103618
1096	0	8488	15106			3.48651	9129173
1097	0	8568	15106			3.845	8665478
1098	0	8648	15106			3.62592	5606268
1099	0	1048	15026			2.98863	4794738
1100	0	1128	15026			3.2749	6297977
1101	0	1208	15026			3.64094	6324761
1102	0	1288	15026			3.672	4286598
1103	0	1368	15026			3.71819	1787897
1104	0	1448	15026			4.49011	2902824
1105	0	1528	15026			3.6965	3332807
1106	0	1608	15026			2.56782	2674024
1107	0	1688	15026			3.50372	4248307
1108	0	1768	15026			3.80231	5600059
1109	0	1848	15026			3.48391	4931624
1110	0	1928	15026			3.56578	4642515
1111	0	2008	15026			2.9157	1940997
1112	0	2088	15026			3.22577	1821103
1113	0	2168	15026			2.87599	1301944
1114	0	2248	15026			3.009	1441599
1115	0	2328	15026			2.80288	2615081
1116	0	2408	15026			2.48998	2668898
1117	0	2488	15026			2.35011	1532469
1118	0	2568	15026			3.23768	528510
1119	0	2648	15026			2.61852	137894
1120	0	2728	15026			2.54223	279351
1121	0	2808	15026			3.42146	500965
1122	0	2888	15026			3.52646	628277
1123	0	2968	15026			2.96551	650562
1124	0	3048	15026			2.63361	1094504
1125	0	3128	15026			2.36514	1953462
1126	0	3208	15026			2.74687	3125293
1127	0	3288	15026			2.94592	7453313
1128	0	3368	15026			3.12906	27988904
1129	0	3448	15026			2.72732	4287616
1130	0	3528	15026			2.49878	12971501
1131	0	3608	15026			2.62667	20512000
1132	0	3688	15026			3.00223	17065098
1133	0	3768	15026			2.86641	18790248
1134	0	3848	15026			2.90955	3172260
1135	0	3928	15026			4.55566	833849
1136	0	4008	15026			2.76847	3272356
1137	0	4088	15026			2.72798	1744106
1138	0	4168	15026			3.73203	3122126
1139	0	4248	15026			3.40345	4393817
1140	0	4328	15026			3.16497	1841197
1141	0	4408	15026			3.40598	1667951
1142	0	4488	15026			3.23188	988720
1143	0	4568	15026			3.04078	841159
1144	0	4648	15026			3.20442	1395982
1145	0	4728	15026			3.06295	2424820
1146	0	4808	15026			2.4917	1057403
1147	0	4888	15026			2.84887	1026210
1148	0	4968	15026			2.95235	821965
1149	0	5048	15026			3.07316	1538144
1150	0	5128	15026			3.56067	2629448
1151	0	5208	15026			2.81162	1258158
1152	0	5288	15026			3.34358	910038
1153	0	5368	15026			2.74753	729508
1154	0	5448	15026			3.15757	787803
1155	0	5528	15026			2.66264	519822
1156	0	5608	15026			3.71683	464439
1157	0	5688	15026			3.33336	1097260
1158	0	5768	15026			2.90295	1128859
1159	0	5848	15026			3.14356	3192874
1160	0	5928	15026			2.88528	4195928
1161	0	6008	15026			3.11473	4206339
1162	0	6088	15026			2.74707	4861500
1163	0	6168	15026			3.43177	4990828
1164	0	6248	15026			3.02081	2553255
1165	0	6328	15026			2.84777	2809594
1166	0	6408	15026			3.0714	1603855
1167	0	6488	15026			2.75718	1737682
1168	0	6568	15026			3.54981	2027001
1169	0	6648	15026			3.51888	1893387
1170	0	6728	15026			3.24111	1871247
1171	0	6808	15026			2.95206	2731921
1172	0	6888	15026			3.0335	1363643
1173	0	6968	15026			3.71427	1865163
1174	0	7048	15026			3.26259	3248947
1175	0	7128	15026			3.43564	1988947
1176	0	7208	15026			3.3774	2230148
1177	0	7288	15026			3.18875	1645339
1178	0	7368	15026			3.35561	2506832
1179	0	7448	15026			3.87322	9285574
1180	0	7528	15026			3.76574	3906213
1181	0	7608	15026			3.46041	2502677
1182	0	7688	15026			3.57743	1619657
1183	0	7768	15026			3.43892	2751833
1184	0	7848	15026			3.33379	1619497
1185	0	7928	15026			3.09708	2291565
1186	0	8008	15026			4.18934	11327263
1187	0	8088	15026			3.64593	18661738
1188	0	8168	15026			3.49512	5019088
1189	0	8248	15026			3.7734	3917940
1190	0	8328	15026			3.3693	4018474
1191	0	8408	15026			4.73045	7619087
1192	0	8488	15026			4.49694	7883000
1193	0	8568	15026			3.9422	8935594
1194	0	8648	15026			4.14043	8713239
1195	0	8728	15026			3.48289	4335423
1196	0	8808	15026			4.49916	1554761
1197	0	968	14946			2.74268	1721746
1198	0	1048	14946			2.92725	13162780
1199	0	1128	14946			3.25435	5435522
1200	0	1208	14946			3.07308	7676003
1201	0	1288	14946			4.1071	1428523
1202	0	1368	14946			3.60378	1080749
1203	0	1448	14946			3.4758	1556152
1204	0	1528	14946			3.41054	1715066
1205	0	1608	14946			3.16901	3320787
1206	0	1688	14946			3.36406	2938292
1207	0	1768	14946			3.15242	11964514
1208	0	1848	14946			3.00675	7836754
1209	0	1928	14946			3.26041	2043482
1210	0	2008	14946			3.48816	3334126
1211	0	2088	14946			2.76698	2289885
1212	0	2168	14946			3.10142	2060219
1213	0	2248	14946			2.80976	3508577
1214	0	2328	14946			2.67746	1520671
1215	0	2408	14946			2.55018	1564603
1216	0	2488	14946			2.65987	1951595
1217	0	2568	14946			2.45455	232768
1218	0	2648	14946			3.96019	184659
1219	0	2728	14946			3.68232	408726
1220	0	2808	14946			3.31596	416033
1221	0	2888	14946			3.21079	515806
1222	0	2968	14946			2.17675	1287320
1223	0	3048	14946			2.4065	2111806
1224	0	3128	14946			3.07305	2794782
1225	0	3208	14946			2.96891	4351486
1226	0	3288	14946			2.7197	5163657
1227	0	3368	14946			2.9389	5044663
1228	0	3448	14946			3.5156	9114877
1229	0	3528	14946			3.02994	13019045
1230	0	3608	14946			3.17774	6929190
1231	0	3688	14946			2.77068	3486171
1232	0	3768	14946			2.48762	4225990
1233	0	3848	14946			3.77162	2593016
1234	0	3928	14946			2.86277	994004
1235	0	4008	14946			3.33041	1289117
1236	0	4088	14946			2.89632	2835554
1237	0	4168	14946			2.98039	2922422
1238	0	4248	14946			3.1622	2029287
1239	0	4328	14946			3.25874	2190660
1240	0	4408	14946			2.92023	2508765
1241	0	4488	14946			3.61385	2291924
1242	0	4568	14946			3.30755	1181563
1243	0	4648	14946			3.11382	869107
1244	0	4728	14946			2.8238	951561
1245	0	4808	14946			3.00042	1357782
1246	0	4888	14946			3.10661	1554865
1247	0	4968	14946			2.59378	1024780
1248	0	5048	14946			3.09493	1364271
1249	0	5128	14946			2.51111	1191331
1250	0	5208	14946			2.74224	1630110
1251	0	5288	14946			2.92646	1009359
1252	0	5368	14946			3.09178	1540177
1253	0	5448	14946			3.71085	1315685
1254	0	5528	14946			2.89136	873595
1255	0	5608	14946			2.77163	603892
1256	0	5688	14946			2.95188	1115476
1257	0	5768	14946			3.50629	2425398
1258	0	5848	14946			3.87526	2236994
1259	0	5928	14946			4.00122	4076233
1260	0	6008	14946			3.32771	13468962
1261	0	6088	14946			3.29853	10482726
1262	0	6168	14946			3.13537	10758440
1263	0	6248	14946			3.22751	4359294
1264	0	6328	14946			3.41903	2099407
1265	0	6408	14946			2.82918	1778154
1266	0	6488	14946			3.01356	1433214
1267	0	6568	14946			2.92677	1517043
1268	0	6648	14946			2.93865	989487
1269	0	6728	14946			3.06782	2447039
1270	0	6808	14946			2.94947	3171664
1271	0	6888	14946			3.05719	3466306
1272	0	6968	14946			3.33132	1766211
1273	0	7048	14946			3.12296	2618900
1274	0	7128	14946			3.16931	2428148
1275	0	7208	14946			3.22105	4931551
1276	0	7288	14946			3.68707	10900595
1277	0	7368	14946			2.98623	2729129
1278	0	7448	14946			3.79477	2535654
1279	0	7528	14946			4.00094	1893111
1280	0	7608	14946			3.1985	2211952
1281	0	7688	14946			3.4314	2716781
1282	0	7768	14946			3.22056	3817897
1283	0	7848	14946			3.67226	3399669
1284	0	7928	14946			3.83364	5875348
1285	0	8008	14946			4.13993	11610733
1286	0	8088	14946			4.11917	3483842
1287	0	8168	14946			3.92533	6201817
1288	0	8248	14946			4.09579	5628580
1289	0	8328	14946			3.96345	20557584
1290	0	8408	14946			3.94056	5836219
1291	0	8488	14946			3.55614	6779548
1292	0	8568	14946			3.61301	7243399
1293	0	8648	14946			4.07332	10521720
1294	0	8728	14946			3.48623	10094745
1295	0	8808	14946			3.30342	5353392
1296	0	8888	14946			3.10662	1685784
1297	0	968	14866			2.9938	1185380
1298	0	1048	14866			3.30114	4450124
1299	0	1128	14866			3.26361	8741737
1300	0	1208	14866			3.41257	4091726
1301	0	1288	14866			4.07419	2239333
1302	0	1368	14866			3.34739	3962473
1303	0	1448	14866			2.99191	2821985
1304	0	1528	14866			3.40846	1910865
1305	0	1608	14866			4.05814	1704540
1306	0	1688	14866			3.92869	1734378
1307	0	1768	14866			2.78413	3135831
1308	0	1848	14866			3.4704	1749550
1309	0	1928	14866			3.53504	1240306
1310	0	2008	14866			3.28923	1163229
1311	0	2088	14866			2.91505	1621323
1312	0	2168	14866			2.94246	2506870
1313	0	2248	14866			2.69066	1633481
1314	0	2328	14866			2.22995	2391784
1315	0	2408	14866			2.49515	2238822
1316	0	2488	14866			2.2952	954574
1317	0	2568	14866			3.54886	425110
1318	0	2648	14866			3.59457	267003
1319	0	2728	14866			3.78372	299641
1320	0	2808	14866			3.2	548768
1321	0	2888	14866			2.34011	834694
1322	0	2968	14866			2.25958	1696067
1323	0	3048	14866			2.8283	3948811
1324	0	3128	14866			2.82208	5352400
1325	0	3208	14866			2.78149	5130706
1326	0	3288	14866			2.59969	3642757
1327	0	3368	14866			2.63461	3333550
1328	0	3448	14866			3.0616	7180272
1329	0	3528	14866			3.136	6662341
1330	0	3608	14866			2.91516	2843210
1331	0	3688	14866			3.99388	758327
1332	0	3768	14866			3.43052	490088
1333	0	3848	14866			3.60456	1831592
1334	0	3928	14866			2.94167	1467023
1335	0	4008	14866			3.02306	2041099
1336	0	4088	14866			3.36893	2021975
1337	0	4168	14866			3.3452	2548696
1338	0	4248	14866			2.78725	2103904
1339	0	4328	14866			2.80714	2626660
1340	0	4408	14866			3.23224	6327937
1341	0	4488	14866			3.49663	2451210
1342	0	4568	14866			2.87548	2846552
1343	0	4648	14866			2.94432	2262693
1344	0	4728	14866			3.0535	1164965
1345	0	4808	14866			2.93812	1600164
1346	0	4888	14866			3.17732	1328418
1347	0	4968	14866			2.82049	1263164
1348	0	5048	14866			2.72313	1560200
1349	0	5128	14866			2.75936	2148003
1350	0	5208	14866			2.68703	1676273
1351	0	5288	14866			3.24215	1042467
1352	0	5368	14866			3.37936	1317643
1353	0	5448	14866			2.77609	1039459
1354	0	5528	14866			3.1742	1609132
1355	0	5608	14866			2.97927	2556653
1356	0	5688	14866			2.82346	1007698
1357	0	5768	14866			2.53311	1293301
1358	0	5848	14866			3.15077	2818037
1359	0	5928	14866			4.14289	4218802
1360	0	6008	14866			3.80924	9779993
1361	0	6088	14866			3.78643	9310272
1362	0	6168	14866			3.42001	17958756
1363	0	6248	14866			3.3381	9757285
1364	0	6328	14866			3.55215	3044773
1365	0	6408	14866			3.53476	3302362
1366	0	6488	14866			2.7247	1523501
1367	0	6568	14866			2.98593	1898019
1368	0	6648	14866			2.48069	1680627
1369	0	6728	14866			2.65581	1605487
1370	0	6808	14866			2.96572	1896721
1371	0	6888	14866			2.98437	2520620
1372	0	6968	14866			2.97429	2796047
1373	0	7048	14866			2.64832	3148052
1374	0	7128	14866			2.94414	6137386
1375	0	7208	14866			3.22532	9284090
1376	0	7288	14866			3.63976	27213408
1377	0	7368	14866			3.9212	2808089
1378	0	7448	14866			3.60287	2969594
1379	0	7528	14866			3.35042	2158727
1380	0	7608	14866			3.82009	2165400
1381	0	7688	14866			3.31216	2658644
1382	0	7768	14866			3.99915	3235072
1383	0	7848	14866			3.45925	3622084
1384	0	7928	14866			4.07733	5940350
1385	0	8008	14866			4.01728	4961291
1386	0	8088	14866			3.70896	3298632
1387	0	8168	14866			4.00949	3891357
1388	0	8248	14866			3.45962	6181840
1389	0	8328	14866			3.31968	6750589
1390	0	8408	14866			3.0073	12401853
1391	0	8488	14866			3.4681	4927771
1392	0	8568	14866			3.75384	6639930
1393	0	8648	14866			3.65335	6920056
1394	0	8728	14866			3.69258	7841661
1395	0	8808	14866			4.01294	11325173
1396	0	8888	14866			3.78383	3602966
1397	0	8968	14866			2.83295	3232897
1398	0	9048	14866			3.96323	2351250
1399	0	888	14786			2.6728	1707670
1400	0	968	14786			3.28347	1975173
1401	0	1048	14786			3.49805	1526180
1402	0	1128	14786			3.17657	3362630
1403	0	1208	14786			3.6067	3183001
1404	0	1288	14786			3.54182	2233005
1405	0	1368	14786			3.10398	8820854
1406	0	1448	14786			3.22112	12795986
1407	0	1528	14786			3.60828	1440574
1408	0	1608	14786			4.62277	1494462
1409	0	1688	14786			2.61378	990488
1410	0	1768	14786			3.21199	1371699
1411	0	1848	14786			3.02913	1538510
1412	0	1928	14786			3.11815	1041706
1413	0	2008	14786			3.01003	379173
1414	0	2088	14786			2.79342	242612
1415	0	2168	14786			2.86981	1065925
1416	0	2248	14786			2.90116	1132625
1417	0	2328	14786			2.11951	1644755
1418	0	2408	14786			2.60715	1450224
1419	0	2488	14786			3.1917	982598
1420	0	2568	14786			3.25659	472857
1421	0	2648	14786			4.01694	538066
1422	0	2728	14786			3.67786	457223
1423	0	2808	14786			3.04897	570524
1424	0	2888	14786			2.76819	1235498
1425	0	2968	14786			2.79766	2411648
1426	0	3048	14786			2.65045	3845882
1427	0	3128	14786			2.58351	4277696
1428	0	3208	14786			2.61957	5169302
1429	0	3288	14786			2.6249	5872712
1430	0	3368	14786			3.01371	6021493
1431	0	3448	14786			3.02386	5514145
1432	0	3528	14786			2.82951	4061013
1433	0	3608	14786			2.79646	2854831
1434	0	3688	14786			3.27415	2143727
1435	0	3768	14786			3.33811	3039217
1436	0	3848	14786			3.42974	2067896
1437	0	3928	14786			3.13247	2358679
1438	0	4008	14786			3.31473	1894171
1439	0	4088	14786			3.20501	1624544
1440	0	4168	14786			3.23221	1549688
1441	0	4248	14786			3.39858	6919976
1442	0	4328	14786			3.25349	2746456
1443	0	4408	14786			3.3534	3065421
1444	0	4488	14786			2.96806	2031569
1445	0	4568	14786			2.82776	2227329
1446	0	4648	14786			3.2638	2498069
1447	0	4728	14786			3.20359	2227242
1448	0	4808	14786			3.43025	2090886
1449	0	4888	14786			3.22158	1781990
1450	0	4968	14786			3.28198	1264495
1451	0	5048	14786			3.0526	1330789
1452	0	5128	14786			2.87996	2137949
1453	0	5208	14786			3.11872	2306674
1454	0	5288	14786			3.06411	1120612
1455	0	5368	14786			2.79844	1052049
1456	0	5448	14786			3.23248	1124806
1457	0	5528	14786			2.89631	1473540
1458	0	5608	14786			3.10104	1592321
1459	0	5688	14786			2.72827	1652605
1460	0	5768	14786			3.08318	2079065
1461	0	5848	14786			2.45712	12788953
1462	0	5928	14786			2.57426	2540701
1463	0	6008	14786			3.54147	3908747
1464	0	6088	14786			3.91626	2531332
1465	0	6168	14786			3.75971	12208898
1466	0	6248	14786			4.21118	18511790
1467	0	6328	14786			2.76029	9796903
1468	0	6408	14786			3.77067	3640636
1469	0	6488	14786			3.78675	3138417
1470	0	6568	14786			3.17629	3004486
1471	0	6648	14786			2.86774	2058919
1472	0	6728	14786			2.69232	2267867
1473	0	6808	14786			2.94902	2276223
1474	0	6888	14786			2.82123	2139933
1475	0	6968	14786			2.45379	2979755
1476	0	7048	14786			2.32854	3124371
1477	0	7128	14786			2.77213	4211940
1478	0	7208	14786			2.8941	3392544
1479	0	7288	14786			3.45225	4274222
1480	0	7368	14786			3.65741	2225713
1481	0	7448	14786			2.93482	2028942
1482	0	7528	14786			3.48477	7203709
1483	0	7608	14786			3.26933	3078059
1484	0	7688	14786			3.22906	3005420
1485	0	7768	14786			3.24322	1882420
1486	0	7848	14786			4.01266	2358432
1487	0	7928	14786			3.87772	3037689
1488	0	8008	14786			4.2038	3812227
1489	0	8088	14786			3.79156	3766603
1490	0	8168	14786			3.81104	5344753
1491	0	8248	14786			3.87792	5527802
1492	0	8328	14786			3.22501	4926865
1493	0	8408	14786			4.04459	4900967
1494	0	8488	14786			3.99948	4362698
1495	0	8568	14786			3.32283	3996778
1496	0	8648	14786			3.95536	3712787
1497	0	8728	14786			4.47561	7640401
1498	0	8808	14786			3.89133	8403983
1499	0	8888	14786			4.78064	8565826
1500	0	8968	14786			4.32564	3093521
1501	0	9048	14786			3.32556	2932875
1502	0	9128	14786			2.48437	3659236
1503	0	808	14706			4.27694	1943121
1504	0	888	14706			3.77003	443459
1505	0	968	14706			3.18391	175109
1506	0	1048	14706			3.67229	1291326
1507	0	1128	14706			3.75297	2265890
1508	0	1208	14706			3.68699	5360111
1509	0	1288	14706			3.7529	2736468
1510	0	1368	14706			2.80005	2941068
1511	0	1448	14706			3.73126	1734954
1512	0	1528	14706			3.35266	2336159
1513	0	1608	14706			2.77972	1232832
1514	0	1688	14706			3.30192	1345473
1515	0	1768	14706			3.5839	1507407
1516	0	1848	14706			2.82945	1667293
1517	0	1928	14706			2.86408	1161189
1518	0	2008	14706			3.14737	92845.5
1519	0	2088	14706			3.46207	25774.7
1520	0	2168	14706			2.10223	1739162
1521	0	2248	14706			2.66309	2056111
1522	0	2328	14706			2.45396	1484333
1523	0	2408	14706			3.32845	761144
1524	0	2488	14706			3.81199	699476
1525	0	2568	14706			3.76472	555445
1526	0	2648	14706			3.49888	2755036
1527	0	2728	14706			3.37948	5904062
1528	0	2808	14706			3.62565	21298.4
1529	0	2888	14706			2.90889	995996
1530	0	2968	14706			2.52606	2278158
1531	0	3048	14706			2.59271	3626490
1532	0	3128	14706			3.0447	5144224
1533	0	3208	14706			2.9735	8169752
1534	0	3288	14706			3.03206	6555236
1535	0	3368	14706			2.87378	5850214
1536	0	3448	14706			3.68457	5589830
1537	0	3528	14706			3.22543	4124822
1538	0	3608	14706			3.10094	3670679
1539	0	3688	14706			3.27236	3087480
1540	0	3768	14706			3.10674	3561283
1541	0	3848	14706			3.13835	2752692
1542	0	3928	14706			2.81092	2247229
1543	0	4008	14706			3.54092	2559378
1544	0	4088	14706			3.15975	2010183
1545	0	4168	14706			2.83336	1820105
1546	0	4248	14706			2.93784	1414876
1547	0	4328	14706			3.0996	1658082
1548	0	4408	14706			3.18511	2296318
1549	0	4488	14706			3.13362	2475383
1550	0	4568	14706			3.18091	2081549
1551	0	4648	14706			3.18152	2135315
1552	0	4728	14706			3.00869	2061556
1553	0	4808	14706			2.99859	2417523
1554	0	4888	14706			3.06131	1746361
1555	0	4968	14706			3.13631	2567928
1556	0	5048	14706			3.09682	2209024
1557	0	5128	14706			2.90421	2547394
1558	0	5208	14706			3.23399	3194974
1559	0	5288	14706			3.53441	1162505
1560	0	5368	14706			3.28289	1682858
1561	0	5448	14706			2.74132	1479761
1562	0	5528	14706			2.65619	1970461
1563	0	5608	14706			2.55424	1237449
1564	0	5688	14706			2.6736	1251164
1565	0	5768	14706			2.77017	2921022
1566	0	5848	14706			3.03072	1404876
1567	0	5928	14706			2.65528	1730697
1568	0	6008	14706			2.68358	1528799
1569	0	6088	14706			2.90955	4431710
1570	0	6168	14706			2.97396	3845519
1571	0	6248	14706			3.59604	4896250
1572	0	6328	14706			3.54109	6476390
1573	0	6408	14706			3.66078	2389712
1574	0	6488	14706			3.38412	4654896
1575	0	6568	14706			2.87928	4651664
1576	0	6648	14706			2.95165	2960514
1577	0	6728	14706			2.84576	1395162
1578	0	6808	14706			2.77641	3200505
1579	0	6888	14706			2.49165	2499604
1580	0	6968	14706			2.94911	3186432
1581	0	7048	14706			2.56547	3295008
1582	0	7128	14706			2.66203	3021969
1583	0	7208	14706			2.78127	1416812
1584	0	7288	14706			2.82548	1289092
1585	0	7368	14706			2.95442	1389648
1586	0	7448	14706			3.34603	1841815
1587	0	7528	14706			3.56283	1618796
1588	0	7608	14706			3.7212	1978900
1589	0	7688	14706			2.96207	2145642
1590	0	7768	14706			3.82849	1529239
1591	0	7848	14706			3.54174	1482835
1592	0	7928	14706			3.26382	1894415
1593	0	8008	14706			3.87729	1744592
1594	0	8088	14706			3.70035	2132258
1595	0	8168	14706			3.42079	1898980
1596	0	8248	14706			4.00611	2701883
1597	0	8328	14706			3.69869	3082143
1598	0	8408	14706			3.71254	2842702
1599	0	8488	14706			3.52324	2695566
1600	0	8568	14706			3.67336	3118272
1601	0	8648	14706			3.47126	2806206
1602	0	8728	14706			3.24622	4107541
1603	0	8808	14706			3.65187	8177181
1604	0	8888	14706			3.90176	8669139
1605	0	8968	14706			3.64101	7898797
1606	0	9048	14706			3.33684	2078578
1607	0	9128	14706			3.87121	2481154
1608	0	728	14626			3.28764	4259.69
1609	0	808	14626			3.47394	348492
1610	0	888	14626			4.54237	125975
1611	0	968	14626			3.57248	65670.2
1612	0	1048	14626			3.66078	180806
1613	0	1128	14626			3.44622	162875
1614	0	1208	14626			3.07487	1322210
1615	0	1288	14626			3.29848	1183780
1616	0	1368	14626			3.12752	482192
1617	0	1448	14626			3.46364	1557878
1618	0	1528	14626			2.91349	2283221
1619	0	1608	14626			3.17568	1950509
1620	0	1688	14626			3.53178	958612
1621	0	1768	14626			3.28778	1236008
1622	0	1848	14626			3.26755	871243
1623	0	1928	14626			2.90884	1109975
1624	0	2008	14626			2.68337	2077131
1625	0	2088	14626			2.41941	552171
1626	0	2168	14626			2.42962	1212416
1627	0	2248	14626			2.80585	1965584
1628	0	2328	14626			3.18482	881618
1629	0	2408	14626			3.57086	819958
1630	0	2488	14626			3.43294	2476522
1631	0	2568	14626			3.57152	4001132
1632	0	2648	14626			3.50032	4832067
1633	0	2728	14626			2.6421	5754611
1634	0	2808	14626			3.06681	1325460
1635	0	2888	14626			2.62437	3124428
1636	0	2968	14626			2.44154	2678739
1637	0	3048	14626			2.45144	2881341
1638	0	3128	14626			2.72187	4434349
1639	0	3208	14626			3.15782	6388798
1640	0	3288	14626			3.13306	8575462
1641	0	3368	14626			3.33993	5816444
1642	0	3448	14626			3.27624	9462418
1643	0	3528	14626			3.09401	5290590
1644	0	3608	14626			3.04461	5445577
1645	0	3688	14626			3.37569	3334157
1646	0	3768	14626			3.84787	3328521
1647	0	3848	14626			3.53659	1867414
1648	0	3928	14626			3.26177	2254449
1649	0	4008	14626			3.08097	2068331
1650	0	4088	14626			3.45882	3563983
1651	0	4168	14626			3.21479	1863676
1652	0	4248	14626			3.02228	1531763
1653	0	4328	14626			3.04607	1704009
1654	0	4408	14626			3.15675	2089003
1655	0	4488	14626			2.98525	1704628
1656	0	4568	14626			3.15191	2909122
1657	0	4648	14626			2.95226	1901662
1658	0	4728	14626			2.83033	1806547
1659	0	4808	14626			3.04275	2462726
1660	0	4888	14626			2.98576	1976009
1661	0	4968	14626			3.10401	3730412
1662	0	5048	14626			2.88554	3136328
1663	0	5128	14626			3.02466	1688259
1664	0	5208	14626			3.14749	1366344
1665	0	5288	14626			3.1124	1292184
1666	0	5368	14626			2.64004	1499724
1667	0	5448	14626			2.97837	1293834
1668	0	5528	14626			2.81066	900553
1669	0	5608	14626			2.48353	930534
1670	0	5688	14626			2.68864	1119023
1671	0	5768	14626			2.69758	1443969
1672	0	5848	14626			2.80879	1761857
1673	0	5928	14626			2.59545	1802009
1674	0	6008	14626			2.67578	1879558
1675	0	6088	14626			3.11595	2393175
1676	0	6168	14626			3.28868	6520023
1677	0	6248	14626			3.30578	11137984
1678	0	6328	14626			3.59224	11133430
1679	0	6408	14626			3.22499	4813751
1680	0	6488	14626			2.68655	3882587
1681	0	6568	14626			2.85747	3041036
1682	0	6648	14626			2.53512	1883011
1683	0	6728	14626			2.5053	2874278
1684	0	6808	14626			3.14143	2242875
1685	0	6888	14626			2.83154	2764369
1686	0	6968	14626			2.61182	4108620
1687	0	7048	14626			2.88012	1936826
1688	0	7128	14626			2.77613	1319577
1689	0	7208	14626			3.2022	1407114
1690	0	7288	14626			2.8183	1145207
1691	0	7368	14626			2.97886	1358051
1692	0	7448	14626			3.10868	1225423
1693	0	7528	14626			3.02227	1589154
1694	0	7608	14626			2.92326	753852
1695	0	7688	14626			3.39112	1292220
1696	0	7768	14626			3.348	1492601
1697	0	7848	14626			3.48542	1482257
1698	0	7928	14626			3.14733	1552424
1699	0	8008	14626			3.11191	1613198
1700	0	8088	14626			3.26128	1662937
1701	0	8168	14626			3.73596	1450887
1702	0	8248	14626			3.51149	1973036
1703	0	8328	14626			3.9774	2174232
1704	0	8408	14626			3.13466	2436418
1705	0	8488	14626			3.94786	1998288
1706	0	8568	14626			2.93485	2231437
1707	0	8648	14626			4.04892	2913981
1708	0	8728	14626			4.19852	4426633
1709	0	8808	14626			3.36449	5103116
1710	0	8888	14626			4.70851	5563202
1711	0	8968	14626			3.9724	7538076
1712	0	9048	14626			4.35402	5870349
1713	0	9128	14626			3.80334	2794780
1714	0	728	14546			3.78324	336276
1715	0	808	14546			4.52429	247321
1716	0	888	14546			3.38948	649059
1717	0	968	14546			3.83256	452576
1718	0	1048	14546			3.76293	130794
1719	0	1128	14546			3.9029	182084
1720	0	1208	14546			3.11388	324272
1721	0	1288	14546			3.21003	7553074
1722	0	1368	14546			3.29939	3459080
1723	0	1448	14546			3.03925	5421378
1724	0	1528	14546			3.831	3879602
1725	0	1608	14546			2.85673	2352761
1726	0	1688	14546			3.18863	1155333
1727	0	1768	14546			2.92191	2194429
1728	0	1848	14546			2.5776	828068
1729	0	1928	14546			2.7712	1179818
1730	0	2008	14546			2.11595	984326
1731	0	2088	14546			2.40431	1095301
1732	0	2168	14546			2.26285	2641419
1733	0	2248	14546			3.17848	3881555
1734	0	2328	14546			3.52302	1763153
1735	0	2408	14546			3.41806	1535688
1736	0	2488	14546			2.71957	6821643
1737	0	2568	14546			2.73143	5632199
1738	0	2648	14546			2.98954	3324756
1739	0	2728	14546			2.7114	6897233
1740	0	2808	14546			2.45135	3859431
1741	0	2888	14546			2.54704	2711950
1742	0	2968	14546			2.70628	2507293
1743	0	3048	14546			3.09867	1877481
1744	0	3128	14546			2.94936	5061813
1745	0	3208	14546			2.80065	5190484
1746	0	3288	14546			3.22721	6151125
1747	0	3368	14546			2.8469	5131109
1748	0	3448	14546			2.62958	5591487
1749	0	3528	14546			3.01214	4602484
1750	0	3608	14546			2.98462	5972985
1751	0	3688	14546			3.04058	6955940
1752	0	3768	14546			2.95481	3271596
1753	0	3848	14546			3.39251	1570984
1754	0	3928	14546			2.49808	1734084
1755	0	4008	14546			3.11032	1382027
1756	0	4088	14546			2.91879	1409019
1757	0	4168	14546			3.18682	1685564
1758	0	4248	14546			3.54875	2341991
1759	0	4328	14546			3.45635	2310938
1760	0	4408	14546			3.32613	1120116
1761	0	4488	14546			3.05515	934644
1762	0	4568	14546			3.18026	1880570
1763	0	4648	14546			3.15509	1903817
1764	0	4728	14546			3.52259	2367628
1765	0	4808	14546			2.99122	3304540
1766	0	4888	14546			3.18766	1653860
1767	0	4968	14546			2.95971	1813511
1768	0	5048	14546			2.9308	1747114
1769	0	5128	14546			3.1401	1709164
1770	0	5208	14546			2.58322	1443913
1771	0	5288	14546			3.16264	1683999
1772	0	5368	14546			2.9463	1086561
1773	0	5448	14546			2.82889	1263755
1774	0	5528	14546			2.8396	747126
1775	0	5608	14546			2.72587	1065458
1776	0	5688	14546			2.93927	1344528
1777	0	5768	14546			2.78584	1519157
1778	0	5848	14546			3.4482	1385687
1779	0	5928	14546			2.63644	1603109
1780	0	6008	14546			2.47301	1119273
1781	0	6088	14546			2.80845	2152565
1782	0	6168	14546			2.83085	3141447
1783	0	6248	14546			3.07313	6838122
1784	0	6328	14546			3.45591	5950550
1785	0	6408	14546			2.91909	3395448
1786	0	6488	14546			2.65806	3072957
1787	0	6568	14546			2.83852	2525772
1788	0	6648	14546			2.56642	1981071
1789	0	6728	14546			2.96726	2875252
1790	0	6808	14546			3.0121	1306411
1791	0	6888	14546			2.80147	1951606
1792	0	6968	14546			2.8459	2609704
1793	0	7048	14546			2.67014	1605590
1794	0	7128	14546			2.85465	1771333
1795	0	7208	14546			2.5466	2015386
1796	0	7288	14546			2.94803	1383482
1797	0	7368	14546			3.0758	842312
1798	0	7448	14546			2.37337	568226
1799	0	7528	14546			2.80851	1088827
1800	0	7608	14546			2.71465	1282866
1801	0	7688	14546			3.59618	1094143
1802	0	7768	14546			2.99193	1077767
1803	0	7848	14546			2.63855	771064
1804	0	7928	14546			3.53067	1421226
1805	0	8008	14546			2.89338	2286924
1806	0	8088	14546			3.42964	2396526
1807	0	8168	14546			3.51678	1629736
1808	0	8248	14546			4.40752	1342620
1809	0	8328	14546			3.51677	1287193
1810	0	8408	14546			3.60852	1856015
1811	0	8488	14546			4.12957	3998154
1812	0	8568	14546			3.91774	2108112
1813	0	8648	14546			4.28727	1977083
1814	0	8728	14546			4.51663	2915821
1815	0	8808	14546			4.69758	3802492
1816	0	8888	14546			4.08629	5097256
1817	0	8968	14546			3.81485	6034799
1818	0	9048	14546			3.59318	7997621
1819	0	9128	14546			3.83657	5034699
1820	0	9208	14546			3.23911	3774872
1821	0	648	14466			2.63886	4259.69
1822	0	728	14466			2.69606	1590545
1823	0	808	14466			3.27453	263767
1824	0	888	14466			3.77662	489930
1825	0	968	14466			3.49937	1104081
1826	0	1048	14466			3.99966	417582
1827	0	1128	14466			3.3574	644641
1828	0	1208	14466			3.71771	5948934
1829	0	1288	14466			2.7268	2468801
1830	0	1368	14466			3.53469	3872554
1831	0	1448	14466			2.65056	20961236
1832	0	1528	14466			3.1173	2205785
1833	0	1608	14466			2.58763	2975509
1834	0	1688	14466			3.1778	724304
1835	0	1768	14466			2.80968	1180910
1836	0	1848	14466			2.6494	1153892
1837	0	1928	14466			2.14207	1133314
1838	0	2008	14466			2.55782	1012575
1839	0	2088	14466			2.09534	1923420
1840	0	2168	14466			1.92584	3335740
1841	0	2248	14466			2.47393	3845201
1842	0	2328	14466			3.30643	1987528
1843	0	2408	14466			2.88262	4622309
1844	0	2488	14466			3.21361	5873429
1845	0	2568	14466			2.47036	5060634
1846	0	2648	14466			2.52415	11840247
1847	0	2728	14466			2.36308	7156810
1848	0	2808	14466			2.26637	4911813
1849	0	2888	14466			2.2316	3438002
1850	0	2968	14466			2.46213	2729728
1851	0	3048	14466			2.7731	2583274
1852	0	3128	14466			2.47583	4237027
1853	0	3208	14466			2.4663	3669686
1854	0	3288	14466			2.99599	3659616
1855	0	3368	14466			2.58153	2389141
1856	0	3448	14466			3.13983	2280699
1857	0	3528	14466			2.99442	2996473
1858	0	3608	14466			3.02518	5237874
1859	0	3688	14466			3.03722	6689742
1860	0	3768	14466			3.28246	3442548
1861	0	3848	14466			2.94983	4662742
1862	0	3928	14466			2.90875	3050909
1863	0	4008	14466			3.46274	2166725
1864	0	4088	14466			2.66883	1719317
1865	0	4168	14466			3.57468	1412110
1866	0	4248	14466			3.34411	1934578
1867	0	4328	14466			2.74463	1522964
1868	0	4408	14466			3.33848	1762517
1869	0	4488	14466			2.73834	1358986
1870	0	4568	14466			3.30519	1260702
1871	0	4648	14466			3.12383	1990876
1872	0	4728	14466			3.50701	1967968
1873	0	4808	14466			3.48794	2339895
1874	0	4888	14466			3.53834	1604060
1875	0	4968	14466			3.44484	1331676
1876	0	5048	14466			2.92172	2117289
1877	0	5128	14466			2.51534	1821804
1878	0	5208	14466			2.93584	1634104
1879	0	5288	14466			2.58901	1601424
1880	0	5368	14466			3.00605	1513252
1881	0	5448	14466			3.01047	1522385
1882	0	5528	14466			3.14213	1969502
1883	0	5608	14466			2.68871	1998144
1884	0	5688	14466			3.00084	5700474
1885	0	5768	14466			2.91187	1209008
1886	0	5848	14466			2.31971	1222981
1887	0	5928	14466			2.81916	970592
1888	0	6008	14466			2.89588	1401342
1889	0	6088	14466			2.64056	1583911
1890	0	6168	14466			2.39376	1547274
1891	0	6248	14466			2.56863	1695259
1892	0	6328	14466			2.72907	2271215
1893	0	6408	14466			2.93636	2137408
1894	0	6488	14466			2.88368	4519048
1895	0	6568	14466			3.04416	3082445
1896	0	6648	14466			2.24259	2272394
1897	0	6728	14466			2.63234	2687887
1898	0	6808	14466			2.36861	1698242
1899	0	6888	14466			2.79139	1541571
1900	0	6968	14466			2.52644	1599140
1901	0	7048	14466			2.92201	3127982
1902	0	7128	14466			2.87528	1288883
1903	0	7208	14466			2.72473	1602639
1904	0	7288	14466			2.62274	18445960
1905	0	7368	14466			2.87267	1632540
1906	0	7448	14466			3.23349	1183868
1907	0	7528	14466			2.99139	865885
1908	0	7608	14466			3.18727	1350397
1909	0	7688	14466			3.71859	694838
1910	0	7768	14466			2.88622	901418
1911	0	7848	14466			2.97277	1141379
1912	0	7928	14466			3.12699	1592203
1913	0	8008	14466			3.61609	827879
1914	0	8088	14466			2.97074	1428944
1915	0	8168	14466			3.70153	1078532
1916	0	8248	14466			3.47424	1221687
1917	0	8328	14466			3.44506	1495736
1918	0	8408	14466			3.91991	2783828
1919	0	8488	14466			3.10071	3315260
1920	0	8568	14466			3.64862	2342263
1921	0	8648	14466			3.29212	1668721
1922	0	8728	14466			3.66308	2289263
1923	0	8808	14466			3.45556	3098510
1924	0	8888	14466			3.51304	4226991
1925	0	8968	14466			3.46309	4876758
1926	0	9048	14466			3.93936	6621202
1927	0	9128	14466			4.3888	6325926
1928	0	9208	14466			3.7161	2223049
1929	0	568	14386			447.735	4259.69
1930	0	648	14386			3.02425	4259.69
1931	0	728	14386			2.75373	4259.69
1932	0	808	14386			2.85091	4259.69
1933	0	888	14386			3.559	3059195
1934	0	968	14386			3.28798	3467467
1935	0	1048	14386			4.72043	321018
1936	0	1128	14386			3.52929	2647253
1937	0	1208	14386			3.04119	6222621
1938	0	1288	14386			2.82547	8356180
1939	0	1368	14386			3.13505	4267832
1940	0	1448	14386			3.06943	4005617
1941	0	1528	14386			3.04945	1643663
1942	0	1608	14386			2.99279	1328972
1943	0	1688	14386			2.67053	886370
1944	0	1768	14386			2.72277	652170
1945	0	1848	14386			2.75395	1080433
1946	0	1928	14386			2.48149	1689788
1947	0	2008	14386			2.82243	1832934
1948	0	2088	14386			2.57854	2423473
1949	0	2168	14386			2.0422	4389885
1950	0	2248	14386			2.43251	3595835
1951	0	2328	14386			3.16717	6790220
1952	0	2408	14386			2.30215	11966356
1953	0	2488	14386			3.08222	10932250
1954	0	2568	14386			2.53861	20130382
1955	0	2648	14386			2.1854	5296326
1956	0	2728	14386			2.34474	6533825
1957	0	2808	14386			2.22957	5922074
1958	0	2888	14386			2.43049	4545542
1959	0	2968	14386			2.81003	7012273
1960	0	3048	14386			2.40289	6014973
1961	0	3128	14386			2.41826	2797653
1962	0	3208	14386			2.51002	3209317
1963	0	3288	14386			3.31725	3865782
1964	0	3368	14386			3.03072	4003500
1965	0	3448	14386			2.60594	3406875
1966	0	3528	14386			2.60187	4099538
1967	0	3608	14386			2.82974	3813910
1968	0	3688	14386			3.09172	3910222
1969	0	3768	14386			3.12119	3652045
1970	0	3848	14386			3.26736	3038810
1971	0	3928	14386			3.31758	2178996
1972	0	4008	14386			2.8356	1663139
1973	0	4088	14386			3.32519	1795060
1974	0	4168	14386			2.88794	1868857
1975	0	4248	14386			3.12056	1482148
1976	0	4328	14386			3.11736	2159042
1977	0	4408	14386			3.1393	1348806
1978	0	4488	14386			2.75043	1595122
1979	0	4568	14386			3.24597	1587525
1980	0	4648	14386			3.08762	2202493
1981	0	4728	14386			3.27937	1831782
1982	0	4808	14386			3.0786	1681304
1983	0	4888	14386			3.49559	1741316
1984	0	4968	14386			3.31491	1617317
1985	0	5048	14386			3.07205	1784650
1986	0	5128	14386			2.64658	1362640
1987	0	5208	14386			3.01515	2196188
1988	0	5288	14386			2.9127	1838751
1989	0	5368	14386			3.14135	1564666
1990	0	5448	14386			2.67381	1928088
1991	0	5528	14386			2.85949	1728185
1992	0	5608	14386			2.87105	1959570
1993	0	5688	14386			3.24967	1891683
1994	0	5768	14386			2.30895	1604680
1995	0	5848	14386			2.56929	1058223
1996	0	5928	14386			2.73406	1019194
1997	0	6008	14386			2.54554	740244
1998	0	6088	14386			2.61587	2498046
[truncated: 50,088 more rows]
