# Supplementary material for: Untargeted pixel-by-pixel metabolite ratio imaging as a novel tool for biomedical discovery in mass spectrometry imaging
Source: eLife. 2025 Mar 18;13:RP96892. doi: 10.7554/eLife.96892 (PMC11919253; doi:10.7554/eLife.96892)
Supplement: Figure 5—source data 1. [file elife-96892-fig5-data1.xlsx]

## Sheet: Figure A-F
spotId	raster	x	y	z	Date	Aspartate	Glutamate	Glutamine	Aspartate/Glutamate	Glutamine/Glutamate	Glutamine/Aspartate
0	0	3688	16226			946936	3.59826e+06	1.19605e+06	0.263165	0.332397	1.26307
1	0	3768	16226			1.01599e+06	3456762	1.05154e+06	0.293913	0.304197	1.03499
2	0	3848	16226			1.0085e+06	3517925	1.10466e+06	0.286676	0.314008	1.09534
3	0	3928	16226			1.10538e+06	3.78947e+06	1097536	0.291697	0.289628	0.992906
4	0	4008	16226			780513	2.85463e+06	989147	0.27342	0.346506	1.2673
5	0	4088	16226			509359	1.80512e+06	542858	0.282174	0.300732	1.06577
6	0	4168	16226			348010	1.32701e+06	364278	0.262251	0.27451	1.04675
7	0	4248	16226			433059	1.35328e+06	355605	0.320006	0.262772	0.821147
8	0	4328	16226			643961	2.59435e+06	627333	0.248217	0.241808	0.974179
9	0	4408	16226			893012	2.95076e+06	784001	0.302638	0.265694	0.877929
10	0	4488	16226			965995	3.21161e+06	963433	0.300782	0.299984	0.997348
11	0	4568	16226			870346	3142362	765322	0.276972	0.24355	0.87933
12	0	4648	16226			654081	2.18944e+06	530623	0.298744	0.242356	0.81125
13	0	4728	16226			1251870	4.43937e+06	854967	0.281993	0.192588	0.682952
14	0	4808	16226			329279	813567	297320	0.404735	0.365453	0.902944
15	0	4888	16226			130156	230623	120239	0.564367	0.521366	0.923806
16	0	4968	16226			80522	223527	52797.2	0.360234	0.2362	0.655686
17	0	5048	16226			82563.3	128955	100338	0.640249	0.778085	1.21529
18	0	5128	16226			822977	2.30797e+06	720815	0.35658	0.312315	0.875862
19	0	5208	16226			1365.31	3031.54	2359.12	0.450367	0.778191	1.7279
20	0	5288	16226			1365.31	3031.54	215852	0.450367	71.2021	158.098
21	0	5368	16226			116947	180797	2359.12	0.646843	0.013048	0.0201725
22	0	5448	16226			1365.31	3031.54	2359.12	0.450367	0.778191	1.7279
23	0	5528	16226			308974	1.07476e+06	390259	0.287481	0.363112	1.26308
24	0	5608	16226			1365.31	505497	219119	0.00270092	0.433472	160.49
25	0	5688	16226			1365.31	3031.54	2359.12	0.450367	0.778191	1.7279
26	0	5768	16226			33425.3	71143.3	48112.6	0.46983	0.676277	1.43941
27	0	5848	16226			1365.31	3031.54	2359.12	0.450367	0.778191	1.7279
28	0	3208	16146			817062	2.94562e+06	782352	0.277382	0.265598	0.957519
29	0	3288	16146			888445	2.80523e+06	722924	0.31671	0.257706	0.813696
30	0	3368	16146			1.0775e+06	3.56824e+06	1.17561e+06	0.30197	0.329466	1.09105
31	0	3448	16146			1.18126e+06	3.82148e+06	1.12109e+06	0.30911	0.293367	0.949069
32	0	3528	16146			1.12317e+06	3386814	994861	0.331632	0.293745	0.885758
33	0	3608	16146			957278	3.07111e+06	834659	0.311704	0.271778	0.871909
34	0	3688	16146			851117	3.17404e+06	803826	0.268149	0.25325	0.944436
35	0	3768	16146			1233796	3949970	1.23675e+06	0.312356	0.313104	1.00239
36	0	3848	16146			1.27399e+06	4677789	1.39692e+06	0.27235	0.298627	1.09649
37	0	3928	16146			1.77978e+06	4.91971e+06	1.42152e+06	0.361765	0.288943	0.798705
38	0	4008	16146			1.27982e+06	3.80176e+06	1.11068e+06	0.336639	0.29215	0.867844
39	0	4088	16146			670754	2.35597e+06	659075	0.284704	0.279747	0.982589
40	0	4168	16146			480783	1.75274e+06	485196	0.274303	0.276821	1.00918
41	0	4248	16146			509052	1.48269e+06	476146	0.34333	0.321136	0.935358
42	0	4328	16146			849900	1.93356e+06	648004	0.439551	0.335135	0.762448
43	0	4408	16146			670275	2.78281e+06	749665	0.240863	0.269392	1.11844
44	0	4488	16146			766840	2.83043e+06	749730	0.270926	0.264882	0.977689
45	0	4568	16146			662287	2.20408e+06	582412	0.300482	0.264243	0.879395
46	0	4648	16146			555436	1.89346e+06	525234	0.293344	0.277393	0.945626
47	0	4728	16146			350051	1.24282e+06	348662	0.281659	0.280541	0.99603
48	0	4808	16146			422057	1.66299e+06	407503	0.253794	0.245042	0.965515
49	0	4888	16146			463235	1.51845e+06	471691	0.305071	0.31064	1.01825
50	0	4968	16146			1.00152e+06	3.21322e+06	796313	0.311689	0.247824	0.795102
51	0	5048	16146			490590	1.45933e+06	436624	0.336175	0.299195	0.889998
52	0	5128	16146			575336	1.7603e+06	506774	0.32684	0.287891	0.880832
53	0	5208	16146			571947	1.65341e+06	514014	0.34592	0.310881	0.898708
54	0	5288	16146			489282	1.37649e+06	331880	0.355456	0.241106	0.678299
55	0	5368	16146			493051	1.38342e+06	460157	0.356399	0.332622	0.933285
56	0	5448	16146			505722	1.58045e+06	490224	0.319987	0.310181	0.969355
57	0	5528	16146			902154	2.88586e+06	874776	0.312612	0.303125	0.969653
58	0	5608	16146			862382	2668511	623662	0.32317	0.233712	0.723186
59	0	5688	16146			788252	2.34142e+06	675488	0.336656	0.288496	0.856944
60	0	5768	16146			738027	2.24812e+06	754709	0.328286	0.335706	1.0226
61	0	5848	16146			624731	2.21784e+06	656222	0.281684	0.295883	1.05041
62	0	5928	16146			604920	1.82374e+06	604746	0.331693	0.331597	0.999711
63	0	6008	16146			627452	2.14617e+06	915050	0.292359	0.426363	1.45836
64	0	6088	16146			266097	861136	300053	0.309007	0.348439	1.12761
65	0	6168	16146			109525	367097	2359.12	0.298354	0.006426	0.0215396
66	0	6248	16146			1365.31	3031.54	191714	0.450367	63.2396	140.418
67	0	6328	16146			1365.31	158946	2359.12	0.00858977	0.014842	1.7279
68	0	6408	16146			1365.31	65404.9	2359.12	0.0208747	0.036069	1.7279
69	0	2728	16066			529448	1907266	881706	0.277595	0.462288	1.66533
70	0	2808	16066			758399	2.51166e+06	703280	0.301951	0.280006	0.927322
71	0	2888	16066			1.20091e+06	3788654	952991	0.316976	0.251538	0.793557
72	0	2968	16066			1.18343e+06	4.07075e+06	1.11649e+06	0.290715	0.27427	0.943434
73	0	3048	16066			1.03793e+06	3.58962e+06	1.00411e+06	0.289147	0.279726	0.967419
74	0	3128	16066			1.16386e+06	3.22221e+06	987460	0.361199	0.306454	0.848435
75	0	3208	16066			1.12103e+06	3.41743e+06	927621	0.328033	0.271438	0.82747
76	0	3288	16066			1.13962e+06	3.51624e+06	1.02384e+06	0.324102	0.291174	0.898404
77	0	3368	16066			1.32234e+06	3949609	1.13519e+06	0.334804	0.287418	0.858467
78	0	3448	16066			1.38866e+06	4538752	1.28795e+06	0.305957	0.283767	0.927475
79	0	3528	16066			1591334	4637960	1.32328e+06	0.343111	0.285314	0.831552
80	0	3608	16066			1548764	4816362	1.31465e+06	0.321563	0.272956	0.848841
81	0	3688	16066			1.60005e+06	4682589	1.39783e+06	0.341702	0.298516	0.873614
82	0	3768	16066			1.79164e+06	5520556	1.61497e+06	0.32454	0.292537	0.901389
83	0	3848	16066			1.9126e+06	5237620	1745628	0.365166	0.333286	0.9127
84	0	3928	16066			2.19023e+06	5.81003e+06	1635999	0.376975	0.281582	0.746952
85	0	4008	16066			2.00996e+06	5.32344e+06	1.41324e+06	0.377568	0.265476	0.70312
86	0	4088	16066			1.37358e+06	3.99002e+06	1.0615e+06	0.344253	0.266038	0.772796
87	0	4168	16066			1.63058e+06	3.96012e+06	1.06489e+06	0.41175	0.268905	0.653078
88	0	4248	16066			1171124	3.36254e+06	1.00877e+06	0.348286	0.300004	0.861373
89	0	4328	16066			1.40769e+06	3279688	967446	0.429215	0.294981	0.687257
90	0	4408	16066			1.29444e+06	4.31198e+06	1.10656e+06	0.300197	0.256623	0.854851
91	0	4488	16066			1.6568e+06	4188211	1.28725e+06	0.395586	0.30735	0.776948
92	0	4568	16066			1160557	3.39486e+06	1.12139e+06	0.341857	0.330319	0.966249
93	0	4648	16066			893254	2.41678e+06	828539	0.369605	0.342827	0.927551
94	0	4728	16066			543621	1.66166e+06	562776	0.327156	0.338684	1.03524
95	0	4808	16066			496489	1.31346e+06	388068	0.378001	0.295455	0.781625
96	0	4888	16066			460201	1.18947e+06	371999	0.386896	0.312743	0.80834
97	0	4968	16066			691645	1.92763e+06	546891	0.358807	0.283712	0.790711
98	0	5048	16066			990820	2744472	728733	0.361024	0.265527	0.735484
99	0	5128	16066			881844	2.85564e+06	731907	0.308808	0.256302	0.829974
100	0	5208	16066			862220	2.43221e+06	706882	0.3545	0.290633	0.819839
101	0	5288	16066			854299	1.99906e+06	679095	0.427349	0.339707	0.794915
102	0	5368	16066			1.06853e+06	2555047	820482	0.418202	0.321122	0.767864
103	0	5448	16066			1.13245e+06	3.58683e+06	900643	0.315724	0.251097	0.795304
104	0	5528	16066			1.21532e+06	3.853e+06	1067722	0.315421	0.277114	0.878554
105	0	5608	16066			1137958	3.47382e+06	968316	0.327582	0.278747	0.850925
106	0	5688	16066			1.20749e+06	2.88591e+06	874420	0.418407	0.302996	0.724166
107	0	5768	16066			986931	2.69844e+06	963727	0.365741	0.357142	0.976489
108	0	5848	16066			662088	2.3609e+06	779028	0.280439	0.329972	1.17662
109	0	5928	16066			1.12548e+06	2.58301e+06	869630	0.435725	0.336673	0.772672
110	0	6008	16066			666796	2.16486e+06	672678	0.308008	0.310725	1.00882
111	0	6088	16066			1.59527e+06	6.40853e+06	1.34944e+06	0.24893	0.210569	0.845899
112	0	6168	16066			1.4503e+06	4.91368e+06	1.13165e+06	0.295154	0.230306	0.780289
113	0	6248	16066			505784	2.17618e+06	523794	0.232418	0.240694	1.03561
114	0	6328	16066			577124	1.81581e+06	418128	0.317832	0.23027	0.724503
115	0	6408	16066			224767	776159	210507	0.289588	0.271216	0.936557
116	0	6488	16066			143918	458438	116661	0.313931	0.254475	0.81061
117	0	6568	16066			40233.1	140862	40353.4	0.285621	0.286476	1.00299
118	0	6648	16066			130016	212238	58854.5	0.612597	0.277304	0.45267
119	0	6728	16066			90548.3	326082	102738	0.277685	0.315068	1.13462
120	0	6808	16066			123616	497748	178465	0.248351	0.358545	1.4437
121	0	6888	16066			101433	213204	62573.4	0.475753	0.293491	0.616896
122	0	6968	16066			65077.4	153449	61506.2	0.424098	0.400825	0.945124
123	0	2248	15986			441690	1.83815e+06	357744	0.24029	0.194621	0.809944
124	0	2328	15986			429821	1.32496e+06	494957	0.324402	0.373563	1.15154
125	0	2408	15986			616166	2597025	771866	0.237258	0.297212	1.25269
126	0	2488	15986			1309927	4.13201e+06	1.10869e+06	0.31702	0.268318	0.846378
127	0	2568	15986			1.82347e+06	5.30111e+06	1.5611e+06	0.343979	0.294485	0.856114
128	0	2648	15986			1.66927e+06	5135639	1552310	0.325037	0.302262	0.929932
129	0	2728	15986			1439888	4.24084e+06	1211049	0.339529	0.285568	0.841072
130	0	2808	15986			1.91378e+06	5.19782e+06	1.63403e+06	0.368188	0.314369	0.853826
131	0	2888	15986			2.03328e+06	5.80742e+06	1.47522e+06	0.350118	0.254023	0.725537
132	0	2968	15986			1.56646e+06	4.4761e+06	1.3132e+06	0.34996	0.293381	0.838327
133	0	3048	15986			1.30044e+06	4.76833e+06	1115959	0.272725	0.234036	0.858137
134	0	3128	15986			1.47622e+06	4.61556e+06	999884	0.319835	0.216633	0.677328
135	0	3208	15986			1.4087e+06	4.48938e+06	1.14798e+06	0.313785	0.25571	0.81492
136	0	3288	15986			1.58772e+06	4.82907e+06	1.03582e+06	0.328783	0.214497	0.652396
137	0	3368	15986			2113740	5570281	1.36788e+06	0.379467	0.245567	0.647136
138	0	3448	15986			2.20462e+06	5629844	1.59396e+06	0.391596	0.283128	0.72301
139	0	3528	15986			1.9437e+06	5.94068e+06	1.66831e+06	0.327185	0.280828	0.858315
140	0	3608	15986			1.64712e+06	5245934	1634761	0.313981	0.311624	0.992496
141	0	3688	15986			2172864	6.47856e+06	1.6396e+06	0.335393	0.253081	0.754579
142	0	3768	15986			2.93372e+06	7.84519e+06	2.0493e+06	0.373952	0.261217	0.698533
143	0	3848	15986			2.60177e+06	7576581	2.0242e+06	0.343396	0.267165	0.778008
144	0	3928	15986			2.67113e+06	7.81231e+06	1.73531e+06	0.341914	0.222125	0.649654
145	0	4008	15986			2.86955e+06	7528179	2.0234e+06	0.381175	0.268777	0.705129
146	0	4088	15986			2662321	7190364	1.80794e+06	0.370262	0.251439	0.679084
147	0	4168	15986			2.19918e+06	6289074	1.60044e+06	0.349683	0.25448	0.727744
148	0	4248	15986			2.35697e+06	5.91663e+06	1627132	0.398364	0.27501	0.690348
149	0	4328	15986			2497664	5.93216e+06	1.76914e+06	0.421038	0.298228	0.708316
150	0	4408	15986			2.1064e+06	5704742	1.57571e+06	0.369237	0.27621	0.748057
151	0	4488	15986			1929026	4.97109e+06	1.20596e+06	0.388049	0.242595	0.625165
152	0	4568	15986			1.24903e+06	4.00517e+06	1.11791e+06	0.311854	0.279118	0.895028
153	0	4648	15986			1565890	3.96511e+06	1.04625e+06	0.394917	0.263863	0.668148
154	0	4728	15986			1.29922e+06	3.73631e+06	875076	0.347729	0.234209	0.673539
155	0	4808	15986			979187	2.99707e+06	692654	0.326715	0.231111	0.707376
156	0	4888	15986			1.26945e+06	3.26347e+06	800889	0.38899	0.24541	0.630892
157	0	4968	15986			1380650	3.35865e+06	1.05858e+06	0.411073	0.315179	0.766723
158	0	5048	15986			1.40527e+06	3403141	984935	0.412932	0.289419	0.700888
159	0	5128	15986			1.41871e+06	3.74271e+06	1.02427e+06	0.37906	0.273672	0.721976
160	0	5208	15986			1.31864e+06	3361066	1.02524e+06	0.392329	0.305034	0.777495
161	0	5288	15986			1.26297e+06	3.11431e+06	984211	0.405536	0.316029	0.779285
162	0	5368	15986			1.14681e+06	4.03416e+06	969604	0.284275	0.240349	0.845479
163	0	5448	15986			1.55537e+06	4339161	1.36942e+06	0.35845	0.315594	0.880443
164	0	5528	15986			1.56591e+06	3716201	1.04581e+06	0.421373	0.281419	0.667861
165	0	5608	15986			1.34437e+06	3.48375e+06	1169066	0.385898	0.335577	0.8696
166	0	5688	15986			1.34001e+06	3.84119e+06	979679	0.348852	0.255045	0.7311
167	0	5768	15986			1.12511e+06	3.56629e+06	1.07503e+06	0.315484	0.301442	0.95549
168	0	5848	15986			1.0899e+06	2.97621e+06	935142	0.366205	0.314206	0.858005
169	0	5928	15986			838703	2.66076e+06	867156	0.315212	0.325905	1.03392
170	0	6008	15986			775508	2.79215e+06	608222	0.277746	0.217833	0.784288
171	0	6088	15986			733224	2.65191e+06	808400	0.276489	0.304837	1.10253
172	0	6168	15986			916901	2.9204e+06	863838	0.313964	0.295795	0.942128
173	0	6248	15986			680892	2.80916e+06	687692	0.242383	0.244803	1.00999
174	0	6328	15986			758360	2.26062e+06	718652	0.335466	0.3179	0.94764
175	0	6408	15986			291448	981617	245399	0.296906	0.249995	0.842
176	0	6488	15986			120978	457319	115960	0.264538	0.253564	0.958516
177	0	6568	15986			88976.2	340924	96169.3	0.260986	0.282085	1.08084
178	0	6648	15986			99408.8	369765	141973	0.268843	0.383955	1.42817
179	0	6728	15986			118809	471398	173093	0.252035	0.36719	1.4569
180	0	6808	15986			154800	611917	176197	0.252976	0.287943	1.13822
181	0	6888	15986			91015.8	408200	90493.6	0.222968	0.221689	0.994262
182	0	6968	15986			86150.7	280595	97727.3	0.307028	0.348285	1.13438
183	0	7048	15986			216453	832619	239816	0.259967	0.288026	1.10793
184	0	7128	15986			159320	614238	181057	0.259377	0.294767	1.13644
185	0	7208	15986			1365.31	3031.54	2359.12	0.450367	0.778191	1.7279
186	0	1848	15906			281644	763262	328520	0.369001	0.430416	1.16643
187	0	1928	15906			860146	2.70921e+06	853786	0.317489	0.315142	0.992607
188	0	2008	15906			1.56745e+06	4.67015e+06	1.28042e+06	0.335632	0.27417	0.816878
189	0	2088	15906			1.1523e+06	4.13404e+06	1.00586e+06	0.278735	0.243312	0.872913
190	0	2168	15906			900164	2.70236e+06	768619	0.333102	0.284425	0.853866
191	0	2248	15906			770696	2.3554e+06	773712	0.327204	0.328485	1.00391
192	0	2328	15906			943843	2.67831e+06	634085	0.352403	0.236748	0.671812
193	0	2408	15906			896684	2950180	879033	0.303942	0.297959	0.980316
194	0	2488	15906			1775435	5.3527e+06	1.58748e+06	0.331689	0.296576	0.894138
195	0	2568	15906			2.18054e+06	6.75351e+06	1864325	0.322875	0.276053	0.854983
196	0	2648	15906			1.50056e+06	5.16242e+06	1.70477e+06	0.29067	0.330227	1.13609
197	0	2728	15906			942364	2.79685e+06	682041	0.336937	0.24386	0.723756
198	0	2808	15906			2161624	6.76628e+06	1.97747e+06	0.31947	0.292253	0.914806
199	0	2888	15906			2168787	6357145	1.72822e+06	0.341157	0.271855	0.796861
200	0	2968	15906			2.15639e+06	7051656	1.921e+06	0.305799	0.272418	0.890841
201	0	3048	15906			2.11796e+06	6459664	1.56735e+06	0.327874	0.242636	0.740027
202	0	3128	15906			2.32403e+06	6.59147e+06	1.71649e+06	0.352581	0.260411	0.738586
203	0	3208	15906			2.50605e+06	6598233	1.8479e+06	0.379806	0.28006	0.737376
204	0	3288	15906			2.12885e+06	5991811	1.68832e+06	0.355294	0.281772	0.793068
205	0	3368	15906			2533212	7173037	1.8506e+06	0.353158	0.257994	0.730534
206	0	3448	15906			2.72505e+06	6.77922e+06	1.95557e+06	0.401971	0.288466	0.717629
207	0	3528	15906			2.22528e+06	6625415	2.089e+06	0.335871	0.315301	0.938759
208	0	3608	15906			2541268	7.25851e+06	2152239	0.350109	0.296512	0.846915
209	0	3688	15906			3.18939e+06	8436094	2.36627e+06	0.378065	0.280494	0.74192
210	0	3768	15906			2525664	7.93592e+06	2.0825e+06	0.318257	0.262414	0.824535
211	0	3848	15906			2.52527e+06	6957630	2.00326e+06	0.36295	0.287922	0.793284
212	0	3928	15906			3.19625e+06	8.056e+06	2.31663e+06	0.396754	0.287566	0.724797
213	0	4008	15906			2.71438e+06	8100333	2.16348e+06	0.335094	0.267086	0.797047
214	0	4088	15906			2.76548e+06	7.83461e+06	2.29636e+06	0.352982	0.293104	0.830365
215	0	4168	15906			2.35527e+06	7376147	2139320	0.319309	0.290032	0.908312
216	0	4248	15906			2.35865e+06	7356050	1.68213e+06	0.320641	0.228674	0.713176
217	0	4328	15906			2.09461e+06	6191702	1732253	0.338293	0.27977	0.827006
218	0	4408	15906			2652996	8100997	2.07599e+06	0.32749	0.256264	0.782508
219	0	4488	15906			2.34225e+06	6.65195e+06	1.8916e+06	0.352115	0.284368	0.8076
220	0	4568	15906			2.15031e+06	5907410	1.49188e+06	0.364003	0.252544	0.693796
221	0	4648	15906			1932786	5295816	1.53809e+06	0.364965	0.290435	0.795789
222	0	4728	15906			2.01668e+06	4831880	1.1821e+06	0.417369	0.244647	0.586165
223	0	4808	15906			1486961	4.4373e+06	1074770	0.335105	0.242213	0.722796
224	0	4888	15906			1.85884e+06	5.19126e+06	1.42226e+06	0.358071	0.273971	0.765131
225	0	4968	15906			1.90819e+06	5107122	1694187	0.373632	0.33173	0.887852
226	0	5048	15906			2.33101e+06	4717910	1.58519e+06	0.494077	0.335994	0.680043
227	0	5128	15906			1.7135e+06	4330850	1.21111e+06	0.39565	0.279647	0.706803
228	0	5208	15906			2.02103e+06	3.98502e+06	1.1244e+06	0.507156	0.282158	0.556352
229	0	5288	15906			1.99224e+06	4.52134e+06	1.51886e+06	0.44063	0.335931	0.762387
230	0	5368	15906			2.60895e+06	6086326	1.50649e+06	0.428657	0.24752	0.577432
231	0	5448	15906			2.4091e+06	4.80723e+06	1.1919e+06	0.501141	0.24794	0.49475
232	0	5528	15906			2.01074e+06	5194368	1.5444e+06	0.3871	0.297323	0.768078
233	0	5608	15906			2.07151e+06	5354504	1.57991e+06	0.386872	0.295062	0.762685
234	0	5688	15906			1487809	3.60864e+06	1.20503e+06	0.412291	0.333931	0.809939
235	0	5768	15906			1.81624e+06	4332519	1210905	0.419212	0.279492	0.666709
236	0	5848	15906			1.56852e+06	3.77216e+06	899865	0.415813	0.238554	0.573705
237	0	5928	15906			1.07961e+06	2.96937e+06	955679	0.363583	0.321846	0.885205
238	0	6008	15906			1.11276e+06	3.2575e+06	944871	0.341599	0.29006	0.849123
239	0	6088	15906			972600	3.30692e+06	1.01279e+06	0.29411	0.306264	1.04132
240	0	6168	15906			1.12575e+06	3.39863e+06	944638	0.331235	0.277946	0.83912
241	0	6248	15906			825902	2.88671e+06	850186	0.286105	0.294517	1.0294
242	0	6328	15906			711379	2.0127e+06	567559	0.353445	0.281989	0.79783
243	0	6408	15906			369745	1.5122e+06	492246	0.244508	0.325517	1.33131
244	0	6488	15906			344599	793251	279103	0.434414	0.351847	0.809935
245	0	6568	15906			156103	619374	150610	0.252033	0.243165	0.964814
246	0	6648	15906			314980	845945	228584	0.37234	0.270211	0.72571
247	0	6728	15906			265659	920518	270526	0.288597	0.293885	1.01832
248	0	6808	15906			265632	965103	298956	0.275237	0.309766	1.12545
249	0	6888	15906			237858	836299	260707	0.284417	0.311739	1.09606
250	0	6968	15906			199198	612824	164752	0.32505	0.268841	0.827076
251	0	7048	15906			208115	673591	161419	0.308964	0.23964	0.775625
252	0	7128	15906			187383	715623	207880	0.261847	0.290488	1.10938
253	0	7208	15906			89268.2	308308	84282.8	0.289542	0.273372	0.944152
254	0	7288	15906			64040.1	299691	66590.2	0.213687	0.222196	1.03982
255	0	7368	15906			161822	312630	2359.12	0.517616	0.007546	0.0145785
256	0	1688	15826			345250	1.44919e+06	411572	0.238237	0.284002	1.1921
257	0	1768	15826			1.07477e+06	3.24796e+06	867079	0.330907	0.266961	0.806757
258	0	1848	15826			817531	2859256	840750	0.285924	0.294045	1.0284
259	0	1928	15826			296398	893309	343606	0.331798	0.384645	1.15927
260	0	2008	15826			1.22333e+06	3226405	1.03449e+06	0.379163	0.320631	0.845628
261	0	2088	15826			1.44336e+06	4.16687e+06	959348	0.346389	0.230232	0.664663
262	0	2168	15826			1.22599e+06	3.52046e+06	1.21087e+06	0.348245	0.343953	0.987673
263	0	2248	15826			1.45588e+06	3.51098e+06	1.04758e+06	0.414663	0.298372	0.719551
264	0	2328	15826			1.16814e+06	3.62824e+06	1.072e+06	0.321958	0.29546	0.9177
265	0	2408	15826			1.55683e+06	4.18159e+06	998158	0.372307	0.238703	0.641147
266	0	2488	15826			1.91793e+06	6241554	1.69379e+06	0.307284	0.271374	0.883136
267	0	2568	15826			2.29275e+06	7.31642e+06	2.1107e+06	0.31337	0.288489	0.9206
268	0	2648	15826			1.66202e+06	4.98499e+06	1.49613e+06	0.333404	0.300126	0.900189
269	0	2728	15826			1.37326e+06	4625568	1.40023e+06	0.296885	0.302715	1.01964
270	0	2808	15826			2.89354e+06	8106835	2.22795e+06	0.356926	0.274823	0.769972
271	0	2888	15826			3132059	8118781	2.32705e+06	0.385779	0.286626	0.742978
272	0	2968	15826			2.72304e+06	7.68808e+06	1.86843e+06	0.35419	0.243029	0.686156
273	0	3048	15826			2184242	6.78788e+06	1.68453e+06	0.321786	0.248167	0.771219
274	0	3128	15826			2.33761e+06	7.22314e+06	1.80931e+06	0.323628	0.250488	0.773999
275	0	3208	15826			3.02046e+06	7.79073e+06	2.02446e+06	0.387699	0.259855	0.67025
276	0	3288	15826			3.12115e+06	8785867	1.99935e+06	0.355247	0.227564	0.64058
277	0	3368	15826			3.27871e+06	10109273	2.43805e+06	0.324327	0.24117	0.743602
278	0	3448	15826			3075968	8893914	2.2086e+06	0.345851	0.248327	0.718017
279	0	3528	15826			2.90981e+06	8961517	2.61797e+06	0.324701	0.292134	0.899703
280	0	3608	15826			3.55303e+06	10077591	2658218	0.352567	0.263775	0.748155
281	0	3688	15826			3563390	9986075	2537319	0.356836	0.254086	0.712052
282	0	3768	15826			3.13771e+06	8041734	2.18123e+06	0.390178	0.271239	0.695167
283	0	3848	15826			2.84846e+06	8.09214e+06	2.50093e+06	0.352003	0.309056	0.877994
284	0	3928	15826			2.84521e+06	7.12046e+06	1885939	0.399582	0.264862	0.662848
285	0	4008	15826			2.63047e+06	6691953	1.62675e+06	0.39308	0.243091	0.618425
286	0	4088	15826			2.89279e+06	7527527	2.05269e+06	0.384294	0.272691	0.709588
287	0	4168	15826			2.91066e+06	7365623	2.45291e+06	0.395168	0.333021	0.842733
288	0	4248	15826			2.72361e+06	7.18964e+06	2.16941e+06	0.378824	0.301741	0.796519
289	0	4328	15826			3.30934e+06	8396527	2.50996e+06	0.394132	0.298929	0.758448
290	0	4408	15826			2885991	7.68798e+06	1.93263e+06	0.37539	0.251383	0.669658
291	0	4488	15826			3.21811e+06	8566194	2.02626e+06	0.375675	0.236541	0.629642
292	0	4568	15826			2.89965e+06	7516592	2.10435e+06	0.385766	0.27996	0.725725
293	0	4648	15826			2.66171e+06	7265949	1.8083e+06	0.366326	0.248873	0.679374
294	0	4728	15826			2.47979e+06	5.86337e+06	1.81644e+06	0.422929	0.309795	0.732498
295	0	4808	15826			2.09273e+06	5087189	1.56786e+06	0.411373	0.308198	0.749192
296	0	4888	15826			2.11127e+06	5081913	1.30619e+06	0.415449	0.257028	0.618676
297	0	4968	15826			2331090	6330337	1.66057e+06	0.368241	0.26232	0.712358
298	0	5048	15826			2.55189e+06	6338408	1.66752e+06	0.402607	0.263081	0.653444
299	0	5128	15826			2.22037e+06	5377709	1404515	0.412883	0.261173	0.63256
300	0	5208	15826			2.09292e+06	5.04643e+06	1.57947e+06	0.414732	0.312988	0.754674
301	0	5288	15826			2.49087e+06	5.31615e+06	1.42226e+06	0.468549	0.267536	0.570988
302	0	5368	15826			2.55398e+06	6.99071e+06	1.8195e+06	0.36534	0.260274	0.712416
303	0	5448	15826			2193733	5597986	1.37397e+06	0.391879	0.24544	0.626317
304	0	5528	15826			1.71939e+06	4.68077e+06	1.20016e+06	0.367332	0.256403	0.698015
305	0	5608	15826			2.55439e+06	6228550	1.64629e+06	0.41011	0.264313	0.644493
306	0	5688	15826			2.25675e+06	5.54024e+06	1.23183e+06	0.407337	0.222342	0.545843
307	0	5768	15826			1.86981e+06	4864826	1.43999e+06	0.384353	0.296001	0.770129
308	0	5848	15826			1.69303e+06	4.88373e+06	1.16699e+06	0.346667	0.238954	0.68929
309	0	5928	15826			1.78252e+06	4435950	1.41412e+06	0.401834	0.318786	0.793328
310	0	6008	15826			1.56095e+06	3.98724e+06	905864	0.391486	0.227191	0.580329
311	0	6088	15826			1327258	3.89768e+06	1.03456e+06	0.340525	0.26543	0.779471
312	0	6168	15826			1.44585e+06	4.80794e+06	1.24415e+06	0.300721	0.258769	0.860494
313	0	6248	15826			1.36331e+06	3.49163e+06	1.1865e+06	0.390452	0.339812	0.870305
314	0	6328	15826			676825	2.48398e+06	562765	0.272476	0.226558	0.831478
315	0	6408	15826			410315	1.56166e+06	404171	0.262743	0.258808	0.985026
316	0	6488	15826			328617	1.08913e+06	292459	0.301725	0.268527	0.889971
317	0	6568	15826			332930	1.08832e+06	293203	0.305912	0.269408	0.880674
318	0	6648	15826			428254	1431980	447410	0.299064	0.312442	1.04473
319	0	6728	15826			450853	1.77455e+06	415010	0.254066	0.233868	0.9205
320	0	6808	15826			472576	1.67893e+06	423903	0.281474	0.252483	0.897005
321	0	6888	15826			496435	1.56941e+06	366885	0.316318	0.233772	0.739039
322	0	6968	15826			359118	1.43872e+06	322403	0.249609	0.224089	0.897762
323	0	7048	15826			375373	1345115	427419	0.279064	0.317757	1.13865
324	0	7128	15826			210431	1.08766e+06	308184	0.193472	0.283346	1.46453
325	0	7208	15826			159677	582141	146641	0.274293	0.251899	0.918358
326	0	7288	15826			57558.3	199543	56132.1	0.288451	0.281304	0.975222
327	0	7368	15826			81937.9	341170	109476	0.240167	0.320885	1.33609
328	0	7448	15826			278297	1.12662e+06	316530	0.247018	0.280955	1.13738
329	0	1608	15746			987601	3363777	994159	0.293599	0.295548	1.00664
330	0	1688	15746			669608	2.03626e+06	700467	0.328841	0.343997	1.04609
331	0	1768	15746			842644	2.17719e+06	594940	0.387032	0.27326	0.706039
332	0	1848	15746			985037	2.71251e+06	880764	0.363145	0.324704	0.894143
333	0	1928	15746			1.17735e+06	3.56119e+06	1.30166e+06	0.330607	0.365513	1.10558
334	0	2008	15746			1.7857e+06	4.68417e+06	1.62975e+06	0.381222	0.347928	0.912665
335	0	2088	15746			1.94914e+06	4900780	1.50993e+06	0.39772	0.3081	0.774667
336	0	2168	15746			1.80443e+06	4.05671e+06	1.21275e+06	0.4448	0.298949	0.672098
337	0	2248	15746			1.72802e+06	4408264	1.32018e+06	0.391997	0.299478	0.76398
338	0	2328	15746			1.89271e+06	4789527	1.41686e+06	0.395177	0.295824	0.748586
339	0	2408	15746			2056451	5733908	1.41364e+06	0.358647	0.24654	0.687417
340	0	2488	15746			2.34941e+06	6.72331e+06	2.04723e+06	0.349442	0.304498	0.871383
341	0	2568	15746			2.49965e+06	6791565	2201343	0.368051	0.324129	0.880662
342	0	2648	15746			1.24365e+06	4.5632e+06	1.23607e+06	0.272539	0.270877	0.993903
343	0	2728	15746			1092874	4.50245e+06	1240591	0.242729	0.275537	1.13516
344	0	2808	15746			2.49376e+06	7.79937e+06	2.11655e+06	0.319739	0.271374	0.848739
345	0	2888	15746			3019751	7.54785e+06	2.47081e+06	0.400081	0.327353	0.818217
346	0	2968	15746			2.76647e+06	8285871	1.87058e+06	0.333878	0.225756	0.676162
347	0	3048	15746			2540540	7.38389e+06	1.95232e+06	0.344065	0.264403	0.768467
348	0	3128	15746			3.01201e+06	8.22877e+06	2.36985e+06	0.366034	0.287995	0.786799
349	0	3208	15746			3.92702e+06	11062030	3050934	0.355	0.275802	0.776907
350	0	3288	15746			3.54884e+06	9921613	2.78647e+06	0.357688	0.280849	0.785177
351	0	3368	15746			3.55384e+06	9943879	2495126	0.35739	0.250921	0.702092
352	0	3448	15746			3.35035e+06	9299610	2.65334e+06	0.360268	0.285317	0.791958
353	0	3528	15746			3.81273e+06	12137636	3.05238e+06	0.314124	0.25148	0.800576
354	0	3608	15746			3.91037e+06	11015580	3115885	0.354986	0.282862	0.796826
355	0	3688	15746			3740406	10389918	2.65706e+06	0.360003	0.255735	0.710367
356	0	3768	15746			3757242	10359718	2.64649e+06	0.362678	0.25546	0.704371
357	0	3848	15746			3.47784e+06	9895765	2.76876e+06	0.351448	0.279792	0.796114
358	0	3928	15746			3.38896e+06	10069742	2529279	0.336549	0.251176	0.746329
359	0	4008	15746			3548553	8760327	2.11668e+06	0.405071	0.241621	0.596491
360	0	4088	15746			2.99295e+06	8370762	2.14114e+06	0.357548	0.255788	0.715394
361	0	4168	15746			3189706	7.74571e+06	2378856	0.411803	0.307119	0.745792
362	0	4248	15746			3.08557e+06	8.33518e+06	2707702	0.370187	0.324852	0.877537
363	0	4328	15746			2.82298e+06	7.14546e+06	1.91601e+06	0.395074	0.268144	0.678719
364	0	4408	15746			2.77047e+06	7.81226e+06	2.13918e+06	0.354631	0.273823	0.772137
365	0	4488	15746			3.07688e+06	7600351	2141853	0.404834	0.28181	0.696113
366	0	4568	15746			3.22408e+06	7.35545e+06	2202449	0.438326	0.299431	0.683124
367	0	4648	15746			2.73384e+06	7136067	2.08533e+06	0.383102	0.292224	0.762783
368	0	4728	15746			2638322	5.7187e+06	1.53779e+06	0.46135	0.268907	0.582868
369	0	4808	15746			2.41193e+06	6.59937e+06	1.88238e+06	0.365479	0.285236	0.780443
370	0	4888	15746			2635754	6918771	1.56793e+06	0.380957	0.226619	0.594869
371	0	4968	15746			2.72658e+06	6.40544e+06	1857651	0.425666	0.290012	0.681312
372	0	5048	15746			2.91808e+06	6.75509e+06	1.62729e+06	0.431983	0.240898	0.557657
373	0	5128	15746			2.52706e+06	6.72413e+06	1.59914e+06	0.37582	0.237821	0.632807
374	0	5208	15746			2.57854e+06	6194621	1.56956e+06	0.416254	0.253375	0.608702
375	0	5288	15746			2.72945e+06	6801990	1.8892e+06	0.401272	0.277742	0.692154
376	0	5368	15746			3.10174e+06	6659515	1889509	0.46576	0.283731	0.609178
377	0	5448	15746			2.65217e+06	6.90938e+06	1.88992e+06	0.383851	0.27353	0.712594
378	0	5528	15746			2.58862e+06	5951911	1.91824e+06	0.434923	0.32229	0.741027
379	0	5608	15746			2444711	6.45599e+06	2107369	0.378673	0.326421	0.862012
380	0	5688	15746			3048104	7.85424e+06	1.89603e+06	0.388084	0.241402	0.622035
381	0	5768	15746			2.79172e+06	6.59086e+06	1.96546e+06	0.423574	0.29821	0.704033
382	0	5848	15746			2.12599e+06	5.92338e+06	1.4185e+06	0.358915	0.239475	0.66722
383	0	5928	15746			1.93164e+06	4.91584e+06	1.37048e+06	0.392941	0.278788	0.709491
384	0	6008	15746			1.63767e+06	3.67026e+06	1.36184e+06	0.446199	0.371046	0.831571
385	0	6088	15746			2.11014e+06	6.1943e+06	1.55307e+06	0.340659	0.250726	0.736003
386	0	6168	15746			2.08916e+06	6068894	1713678	0.344241	0.282371	0.82027
387	0	6248	15746			1.09543e+06	3.70151e+06	1.20089e+06	0.29594	0.324431	1.09628
388	0	6328	15746			699678	2.1109e+06	782076	0.331459	0.370493	1.11777
389	0	6408	15746			746506	2.11648e+06	619657	0.352711	0.292777	0.830076
390	0	6488	15746			730670	2.36992e+06	641816	0.308311	0.270818	0.878393
391	0	6568	15746			779917	2.3232e+06	528674	0.335708	0.227562	0.677859
392	0	6648	15746			756059	2478198	805289	0.305084	0.324949	1.06511
393	0	6728	15746			531786	1.74936e+06	524554	0.303988	0.299855	0.986402
394	0	6808	15746			796433	2519040	589603	0.316165	0.234059	0.740305
395	0	6888	15746			917857	2.27449e+06	636188	0.403544	0.279706	0.693123
396	0	6968	15746			808044	2303958	627006	0.35072	0.272143	0.775956
397	0	7048	15746			741364	2.28136e+06	605194	0.324966	0.265278	0.816325
398	0	7128	15746			652319	2.09618e+06	505866	0.311194	0.241328	0.77549
399	0	7208	15746			560662	1.55788e+06	603413	0.359887	0.387329	1.07625
400	0	7288	15746			251587	766532	181417	0.328214	0.236673	0.721092
401	0	7368	15746			277409	827828	194961	0.335105	0.235509	0.702791
402	0	7448	15746			317188	1.01212e+06	260767	0.313389	0.257643	0.82212
403	0	7528	15746			460915	1807542	513218	0.254996	0.283932	1.11348
404	0	7608	15746			709567	2351703	678954	0.301725	0.288708	0.956858
405	0	1528	15666			483547	1.47052e+06	563106	0.328827	0.38293	1.16453
406	0	1608	15666			644710	1965370	550749	0.328035	0.280227	0.854259
407	0	1688	15666			955650	2.30265e+06	683573	0.415022	0.296864	0.715297
408	0	1768	15666			1.08364e+06	3325541	806185	0.325852	0.242422	0.743963
409	0	1848	15666			1.33353e+06	3.82158e+06	1.10817e+06	0.348946	0.289978	0.83101
410	0	1928	15666			1.78888e+06	4928926	1.37625e+06	0.362934	0.27922	0.769339
411	0	2008	15666			2398103	6.36753e+06	1.69185e+06	0.376614	0.265699	0.705494
412	0	2088	15666			2.54447e+06	5608486	2.0241e+06	0.453682	0.3609	0.795491
413	0	2168	15666			1.85335e+06	5.44929e+06	1.37869e+06	0.340108	0.253004	0.743891
414	0	2248	15666			1.90751e+06	5059071	1.44578e+06	0.377047	0.28578	0.757943
415	0	2328	15666			2.0058e+06	6.10017e+06	1.73065e+06	0.328811	0.283705	0.862821
416	0	2408	15666			2.83069e+06	7.75548e+06	2265784	0.364992	0.292153	0.800436
417	0	2488	15666			2.76388e+06	6.85091e+06	2.10186e+06	0.403432	0.3068	0.760474
418	0	2568	15666			1911457	6509205	1707595	0.293654	0.262335	0.893347
419	0	2648	15666			583278	2735318	740153	0.21324	0.270591	1.26895
420	0	2728	15666			484942	2.91397e+06	706016	0.166419	0.242287	1.45588
421	0	2808	15666			1.78857e+06	6723950	1.84042e+06	0.266	0.273712	1.02899
422	0	2888	15666			2.79416e+06	8756663	2467403	0.319089	0.281774	0.883058
423	0	2968	15666			3.24588e+06	8906069	2.73174e+06	0.364457	0.306728	0.841604
424	0	3048	15666			3423644	9026812	2.81115e+06	0.379275	0.311422	0.821098
425	0	3128	15666			3.35955e+06	9368079	2.36132e+06	0.358616	0.252061	0.70287
426	0	3208	15666			3.57432e+06	8885908	2.56474e+06	0.402246	0.28863	0.717546
427	0	3288	15666			3.6446e+06	9387877	2.65763e+06	0.388224	0.283092	0.729197
428	0	3368	15666			3.47485e+06	9346224	2679037	0.371792	0.286644	0.770979
429	0	3448	15666			3.71243e+06	10668491	2.87535e+06	0.34798	0.269518	0.77452
430	0	3528	15666			3746186	10594008	2.91129e+06	0.353614	0.274805	0.777134
431	0	3608	15666			4.2155e+06	11001081	3.23308e+06	0.38319	0.293887	0.76695
432	0	3688	15666			3560607	9964698	2464857	0.357322	0.247359	0.692258
433	0	3768	15666			3.31261e+06	9691049	2.94947e+06	0.341822	0.30435	0.890375
434	0	3848	15666			4.11209e+06	11012688	3.24309e+06	0.373395	0.294487	0.788673
435	0	3928	15666			3.00974e+06	9258894	2.37212e+06	0.325065	0.256199	0.788147
436	0	4008	15666			3.14357e+06	7.77512e+06	2.63959e+06	0.404312	0.339492	0.839678
437	0	4088	15666			2.70526e+06	7561084	1.98136e+06	0.357787	0.262047	0.732411
438	0	4168	15666			2.87684e+06	8041204	2180041	0.357762	0.271109	0.757791
439	0	4248	15666			3448124	7.60181e+06	2.55253e+06	0.453593	0.335779	0.740265
440	0	4328	15666			3.50164e+06	8699032	2.60688e+06	0.402532	0.299675	0.744476
441	0	4408	15666			3.21468e+06	7.59734e+06	2.07088e+06	0.423133	0.272579	0.644194
442	0	4488	15666			3.17524e+06	7.38764e+06	2.25224e+06	0.429805	0.304867	0.709314
443	0	4568	15666			3.18117e+06	7837549	2.3761e+06	0.405888	0.303168	0.746925
444	0	4648	15666			2.88414e+06	7.18232e+06	2.18102e+06	0.401562	0.303665	0.756211
445	0	4728	15666			2.60924e+06	5890660	1.40534e+06	0.442944	0.238572	0.538604
446	0	4808	15666			2.5927e+06	6126215	1.89536e+06	0.423214	0.309386	0.731038
447	0	4888	15666			3.36164e+06	7375669	2.01697e+06	0.455774	0.273462	0.599995
448	0	4968	15666			3.44115e+06	8633995	2.27571e+06	0.398559	0.263575	0.661321
449	0	5048	15666			3.01081e+06	8.13821e+06	2.30111e+06	0.36996	0.282753	0.764282
450	0	5128	15666			2727720	6.82677e+06	2.03492e+06	0.399562	0.298079	0.746013
451	0	5208	15666			3.07529e+06	7284259	2354595	0.422183	0.323244	0.765649
452	0	5288	15666			2.92883e+06	6543629	1964115	0.447584	0.300157	0.670615
453	0	5368	15666			2.53593e+06	7.20286e+06	1.99612e+06	0.352073	0.277129	0.787134
454	0	5448	15666			3.18523e+06	6929148	1.86089e+06	0.459686	0.268559	0.584224
455	0	5528	15666			2.51873e+06	6.12551e+06	1.70512e+06	0.411186	0.278364	0.676978
456	0	5608	15666			2.8775e+06	7.54762e+06	2.1289e+06	0.381246	0.282062	0.739842
457	0	5688	15666			2.78407e+06	6772156	2046532	0.411106	0.302198	0.735085
458	0	5768	15666			2618726	6.55626e+06	1.80458e+06	0.399424	0.275246	0.689107
459	0	5848	15666			2.14233e+06	5.57881e+06	1.58582e+06	0.384012	0.284258	0.740233
460	0	5928	15666			2.16886e+06	5.47567e+06	1.45465e+06	0.39609	0.265656	0.670696
461	0	6008	15666			2.11637e+06	5.14023e+06	1.59828e+06	0.411726	0.310935	0.7552
462	0	6088	15666			1.86953e+06	6043552	1.6136e+06	0.309342	0.266995	0.863106
463	0	6168	15666			1.98883e+06	5.1472e+06	1433298	0.386392	0.278462	0.720672
464	0	6248	15666			893329	3.23789e+06	971484	0.275899	0.300036	1.08749
465	0	6328	15666			78890.2	382110	109264	0.206459	0.285948	1.38501
466	0	6408	15666			824456	2.44457e+06	739381	0.337261	0.302459	0.896811
467	0	6488	15666			917934	3.27066e+06	902657	0.280657	0.275987	0.983358
468	0	6568	15666			1119010	3.78377e+06	982465	0.295739	0.259652	0.877977
469	0	6648	15666			1.40037e+06	3.90504e+06	1.15657e+06	0.358607	0.296175	0.825904
470	0	6728	15666			1.09398e+06	3.16773e+06	958180	0.34535	0.302481	0.875869
471	0	6808	15666			976944	2.95942e+06	879471	0.330114	0.297177	0.900226
472	0	6888	15666			1.09779e+06	3.10936e+06	834226	0.353059	0.268295	0.759914
473	0	6968	15666			985464	2.5968e+06	670462	0.379492	0.258188	0.680352
474	0	7048	15666			806276	2.67275e+06	680157	0.301666	0.254479	0.843578
475	0	7128	15666			803525	2.40225e+06	647304	0.334489	0.269457	0.80558
476	0	7208	15666			641144	2.09434e+06	652731	0.306132	0.311665	1.01807
477	0	7288	15666			675159	1.98995e+06	566438	0.339284	0.284649	0.83897
478	0	7368	15666			799719	1.86471e+06	409857	0.428871	0.219797	0.512501
479	0	7448	15666			634819	1666993	478751	0.380817	0.287194	0.754153
480	0	7528	15666			1.00623e+06	2.62687e+06	660940	0.383053	0.251608	0.656848
481	0	7608	15666			1.08741e+06	3.13384e+06	865989	0.34699	0.276334	0.796376
482	0	7688	15666			1.15752e+06	3.0715e+06	835910	0.376858	0.272151	0.722157
483	0	7768	15666			1.03496e+06	2.89387e+06	692547	0.357637	0.239315	0.669156
484	0	1528	15586			815014	1.97245e+06	860485	0.413199	0.436252	1.05579
485	0	1608	15586			862686	2.4913e+06	838903	0.346279	0.336733	0.972432
486	0	1688	15586			1.03657e+06	2.52235e+06	799213	0.410955	0.316852	0.771014
487	0	1768	15586			1407942	3.77762e+06	965452	0.372706	0.255572	0.685719
488	0	1848	15586			2.5136e+06	5.53329e+06	1.59616e+06	0.454269	0.288466	0.635011
489	0	1928	15586			2534916	5.44905e+06	1.59503e+06	0.465203	0.292717	0.629223
490	0	2008	15586			2219782	5651351	1.47818e+06	0.392788	0.261563	0.665914
491	0	2088	15586			2.06825e+06	5777256	1.66608e+06	0.358	0.288387	0.80555
492	0	2168	15586			2444861	6213630	1.4609e+06	0.393467	0.235112	0.597539
493	0	2248	15586			2185618	5795242	1.77074e+06	0.37714	0.305551	0.810179
494	0	2328	15586			3.02591e+06	7.84979e+06	2.30956e+06	0.385477	0.294219	0.763261
495	0	2408	15586			3.03844e+06	9312522	2938734	0.326274	0.315568	0.967186
496	0	2488	15586			3.08833e+06	10170770	2.98982e+06	0.303648	0.293962	0.968103
497	0	2568	15586			2.40119e+06	7.73991e+06	2.03137e+06	0.310235	0.262455	0.845988
498	0	2648	15586			1.78409e+06	6353612	1.78019e+06	0.2808	0.280186	0.997812
499	0	2728	15586			1.8991e+06	6.86879e+06	1.93325e+06	0.276482	0.281454	1.01798
500	0	2808	15586			2.47717e+06	7533705	2.04979e+06	0.328812	0.272083	0.827471
501	0	2888	15586			2.75963e+06	8806921	2377081	0.313348	0.269911	0.861377
502	0	2968	15586			3046082	9925362	2.69465e+06	0.306899	0.271492	0.884629
503	0	3048	15586			3.68022e+06	10404405	2.66829e+06	0.353717	0.256458	0.725036
504	0	3128	15586			3.36425e+06	8817063	2622610	0.381562	0.297447	0.779552
505	0	3208	15586			3.82994e+06	10633453	2686073	0.360179	0.252606	0.701335
506	0	3288	15586			3424300	9388830	2641899	0.364721	0.281387	0.771515
507	0	3368	15586			3.54276e+06	9541975	3.3617e+06	0.371281	0.352306	0.948893
508	0	3448	15586			3.69608e+06	9840945	3.02534e+06	0.375582	0.307423	0.818526
509	0	3528	15586			3789375	11833217	3.91123e+06	0.320232	0.33053	1.03216
510	0	3608	15586			3.76662e+06	9771648	2.54939e+06	0.385464	0.260896	0.676837
511	0	3688	15586			3.54331e+06	9459652	2.83303e+06	0.374571	0.299486	0.799544
512	0	3768	15586			3.30714e+06	9488479	2365420	0.348542	0.249294	0.715247
513	0	3848	15586			2.6648e+06	7.48263e+06	2.12659e+06	0.356131	0.284203	0.79803
514	0	3928	15586			2.58427e+06	6.56821e+06	1.95614e+06	0.393451	0.29782	0.756943
515	0	4008	15586			2.65289e+06	7204658	1.97326e+06	0.368219	0.273887	0.743817
516	0	4088	15586			2.45569e+06	7.13328e+06	1.71755e+06	0.344258	0.24078	0.699417
517	0	4168	15586			3534151	8181422	2.66215e+06	0.431973	0.32539	0.753265
518	0	4248	15586			2496195	6612612	2013714	0.37749	0.304526	0.806713
519	0	4328	15586			2786066	6904540	2.03092e+06	0.403512	0.294143	0.728958
520	0	4408	15586			2829473	7.0274e+06	1.9496e+06	0.402634	0.277429	0.689034
521	0	4488	15586			3.11211e+06	7.1412e+06	1.87712e+06	0.435797	0.262857	0.603164
522	0	4568	15586			3.38776e+06	8686286	2.47009e+06	0.390012	0.284366	0.729121
523	0	4648	15586			3309524	8654828	2375200	0.38239	0.274436	0.717686
524	0	4728	15586			2666861	7.08372e+06	1.7937e+06	0.376477	0.253215	0.67259
525	0	4808	15586			3.26041e+06	8.31413e+06	2.43582e+06	0.392153	0.292973	0.747089
526	0	4888	15586			3.36615e+06	8.15122e+06	2111328	0.412962	0.25902	0.627224
527	0	4968	15586			3.20245e+06	8403813	2.07263e+06	0.381071	0.246629	0.647201
528	0	5048	15586			3.25263e+06	6.6224e+06	1.90025e+06	0.491156	0.286942	0.584218
529	0	5128	15586			2.75713e+06	5.98733e+06	1652909	0.460494	0.276068	0.599503
530	0	5208	15586			3.10812e+06	6.78123e+06	2.01262e+06	0.458341	0.296792	0.647536
531	0	5288	15586			2.5908e+06	5.91954e+06	1.83086e+06	0.43767	0.309291	0.706677
532	0	5368	15586			2.60506e+06	5.85518e+06	1.95133e+06	0.444916	0.333266	0.749053
533	0	5448	15586			2.43951e+06	5.87957e+06	1.96466e+06	0.414912	0.33415	0.80535
534	0	5528	15586			2.60155e+06	6.61832e+06	1983958	0.393083	0.299768	0.762607
535	0	5608	15586			2.53831e+06	6797657	1.9061e+06	0.373409	0.280405	0.750934
536	0	5688	15586			2.90853e+06	6.62952e+06	2.11948e+06	0.438723	0.319703	0.728713
537	0	5768	15586			2.07633e+06	5.63809e+06	1.81683e+06	0.368268	0.322241	0.875019
538	0	5848	15586			2242942	6209488	1859597	0.361212	0.299477	0.829088
539	0	5928	15586			2.41504e+06	5657664	1.57127e+06	0.426861	0.277724	0.650618
540	0	6008	15586			2.45023e+06	6.36544e+06	2212106	0.384927	0.347518	0.902815
541	0	6088	15586			2.64966e+06	7364650	2.01518e+06	0.359781	0.273629	0.760543
542	0	6168	15586			1.91845e+06	5026099	1.54405e+06	0.381697	0.307207	0.804845
543	0	6248	15586			978440	2.65093e+06	811190	0.369093	0.306002	0.829065
544	0	6328	15586			814566	2.54668e+06	652375	0.319854	0.256167	0.800887
545	0	6408	15586			939913	2.86363e+06	875838	0.328224	0.305849	0.93183
546	0	6488	15586			1.80113e+06	4.71943e+06	1.21985e+06	0.381642	0.258473	0.677266
547	0	6568	15586			1672460	4494729	1.09405e+06	0.372094	0.243408	0.654159
548	0	6648	15586			1.55729e+06	4.65453e+06	1.12985e+06	0.334574	0.242742	0.725524
549	0	6728	15586			1.41773e+06	4067869	1.19187e+06	0.34852	0.292996	0.840687
550	0	6808	15586			1.26481e+06	3.56297e+06	1.12343e+06	0.354989	0.315308	0.88822
551	0	6888	15586			1.39424e+06	4.11279e+06	1.15723e+06	0.339002	0.281374	0.830008
552	0	6968	15586			1.00652e+06	3.45323e+06	998566	0.291471	0.289168	0.992099
553	0	7048	15586			1.09682e+06	3.55993e+06	804464	0.308102	0.225977	0.733451
554	0	7128	15586			1.05603e+06	3162693	917078	0.333903	0.289967	0.868418
555	0	7208	15586			939170	3.66007e+06	940338	0.256599	0.256918	1.00124
556	0	7288	15586			1.36568e+06	3.68815e+06	868753	0.370289	0.235553	0.636133
557	0	7368	15586			1.27797e+06	3.26537e+06	983108	0.39137	0.301071	0.769275
558	0	7448	15586			1.4443e+06	4.41538e+06	1.08856e+06	0.327107	0.246538	0.753692
559	0	7528	15586			1497583	3.44998e+06	966204	0.434085	0.280061	0.645176
560	0	7608	15586			1499706	4.29673e+06	1.17197e+06	0.349035	0.272758	0.781465
561	0	7688	15586			1.31157e+06	3.93403e+06	959077	0.33339	0.24379	0.731244
562	0	7768	15586			1.19941e+06	3.12899e+06	851067	0.383323	0.271994	0.709569
563	0	7848	15586			1.06152e+06	3.15249e+06	879376	0.336724	0.278947	0.828412
564	0	1448	15506			863620	1.87337e+06	641237	0.460997	0.34229	0.742498
565	0	1528	15506			1.00932e+06	2820595	799286	0.357838	0.283375	0.791909
566	0	1608	15506			1.62995e+06	3.83031e+06	1.05194e+06	0.425539	0.274635	0.645382
567	0	1688	15506			1.37011e+06	3521909	1075660	0.389026	0.30542	0.785088
568	0	1768	15506			1.40617e+06	4.02197e+06	1.05632e+06	0.349623	0.262637	0.7512
569	0	1848	15506			2.71915e+06	6.06569e+06	1.38392e+06	0.448283	0.228155	0.508952
570	0	1928	15506			2837153	6.3517e+06	2.07185e+06	0.446676	0.326189	0.730257
571	0	2008	15506			2.61339e+06	6384181	1.59033e+06	0.409355	0.249105	0.60853
572	0	2088	15506			2.63399e+06	6197863	1.84289e+06	0.424983	0.297343	0.699658
573	0	2168	15506			2403131	6.21511e+06	1.81914e+06	0.38666	0.292696	0.756986
574	0	2248	15506			2.7239e+06	6640257	2.00761e+06	0.41021	0.302339	0.737034
575	0	2328	15506			3.61089e+06	9573481	2.97822e+06	0.377176	0.31109	0.824788
576	0	2408	15506			3.69219e+06	13215484	3.12781e+06	0.279384	0.236677	0.847141
577	0	2488	15506			3608972	15557014	3.45569e+06	0.231984	0.222131	0.957528
578	0	2568	15506			2.67756e+06	10090620	3002565	0.265352	0.29756	1.12138
579	0	2648	15506			2999975	7795489	2351309	0.384835	0.301624	0.783776
580	0	2728	15506			2.95516e+06	8241978	2506954	0.35855	0.304169	0.848332
581	0	2808	15506			2.45134e+06	7390074	2.20778e+06	0.331707	0.298749	0.90064
582	0	2888	15506			2.95229e+06	7.57752e+06	2.05336e+06	0.389612	0.270981	0.695516
583	0	2968	15506			3.24848e+06	9033130	2.76195e+06	0.359619	0.305758	0.850228
584	0	3048	15506			3.13221e+06	8850345	2.4322e+06	0.353908	0.274814	0.776513
585	0	3128	15506			2.98197e+06	8590923	2.33047e+06	0.347107	0.271271	0.781522
586	0	3208	15506			2794783	7.98994e+06	2494223	0.349788	0.312171	0.892457
587	0	3288	15506			3.32262e+06	8735913	2.76413e+06	0.38034	0.31641	0.831915
588	0	3368	15506			3.5765e+06	9608167	3.08434e+06	0.372235	0.321013	0.862392
589	0	3448	15506			3.17321e+06	8354901	2.36028e+06	0.379803	0.282502	0.743813
590	0	3528	15506			3.52338e+06	10985940	3.14607e+06	0.320717	0.286372	0.892912
591	0	3608	15506			2.69329e+06	7.68155e+06	2473878	0.350618	0.322054	0.918533
592	0	3688	15506			2531875	7923194	2137155	0.319552	0.269734	0.8441
593	0	3768	15506			3153816	8326600	2.95063e+06	0.378764	0.354362	0.935575
594	0	3848	15506			5035351	19069764	4.617e+06	0.264049	0.242111	0.916916
595	0	3928	15506			3.90027e+06	16403352	4.62759e+06	0.237772	0.282113	1.18648
596	0	4008	15506			2.33249e+06	6.01871e+06	1.9026e+06	0.38754	0.316114	0.815693
597	0	4088	15506			2629995	6069479	1.74749e+06	0.433315	0.287914	0.664445
598	0	4168	15506			2667148	6909157	2.06415e+06	0.386031	0.298756	0.773917
599	0	4248	15506			2.65741e+06	7507358	1890155	0.353974	0.251774	0.711277
600	0	4328	15506			2991952	7.67674e+06	2.20955e+06	0.389742	0.287823	0.738496
601	0	4408	15506			3.46981e+06	8.24063e+06	2.3208e+06	0.42106	0.281629	0.668856
602	0	4488	15506			3.09476e+06	7.84043e+06	2.23632e+06	0.394719	0.28523	0.722615
603	0	4568	15506			3.50546e+06	9038494	2593250	0.387837	0.286912	0.739774
604	0	4648	15506			3.67208e+06	9011038	2730754	0.407509	0.303045	0.743654
605	0	4728	15506			3.62528e+06	8307419	2.23324e+06	0.43639	0.268825	0.61602
606	0	4808	15506			3269939	8.14734e+06	2.52042e+06	0.40135	0.309354	0.770784
607	0	4888	15506			3.23253e+06	6.3794e+06	1707814	0.506713	0.267708	0.528322
608	0	4968	15506			3.34075e+06	7767504	2.33008e+06	0.430093	0.299978	0.697473
609	0	5048	15506			2.98306e+06	7.61037e+06	1.89519e+06	0.391973	0.249027	0.635317
610	0	5128	15506			3.19314e+06	7.53323e+06	2.04093e+06	0.423874	0.270923	0.639159
611	0	5208	15506			3.48777e+06	8.11715e+06	1987827	0.429679	0.244892	0.569942
612	0	5288	15506			2.97956e+06	7057179	1.89458e+06	0.422202	0.268461	0.63586
613	0	5368	15506			2250057	5533039	1.54552e+06	0.406658	0.279325	0.686879
614	0	5448	15506			2264917	5.77671e+06	1.54697e+06	0.392077	0.267793	0.683012
615	0	5528	15506			2.34291e+06	6.55739e+06	1.69469e+06	0.357293	0.25844	0.723329
616	0	5608	15506			2.44255e+06	6.09738e+06	1.79321e+06	0.400591	0.294095	0.734154
617	0	5688	15506			2.2498e+06	6304680	1.50089e+06	0.356846	0.23806	0.667122
618	0	5768	15506			2.0607e+06	5755694	1.58348e+06	0.358028	0.275115	0.768418
619	0	5848	15506			2248161	6142919	1.77997e+06	0.365976	0.28976	0.791747
620	0	5928	15506			1.9527e+06	5.42761e+06	1.38827e+06	0.359771	0.255779	0.71095
621	0	6008	15506			1.99016e+06	5281122	1.64731e+06	0.376845	0.311923	0.827724
622	0	6088	15506			2.57019e+06	6.67725e+06	2.18079e+06	0.384917	0.3266	0.848496
623	0	6168	15506			1.47577e+06	4.18369e+06	968821	0.352744	0.231571	0.656484
624	0	6248	15506			942581	3.33693e+06	938451	0.282469	0.281231	0.995618
625	0	6328	15506			1.45414e+06	4.31819e+06	1246922	0.336747	0.288761	0.857499
626	0	6408	15506			1.39438e+06	4.13245e+06	1.24722e+06	0.337421	0.301811	0.894465
627	0	6488	15506			1.90509e+06	4.8554e+06	1362440	0.392365	0.280603	0.715159
628	0	6568	15506			2.31756e+06	6288443	1.71742e+06	0.368542	0.273107	0.741047
629	0	6648	15506			1.71781e+06	5.38789e+06	1.6166e+06	0.318828	0.300044	0.941084
630	0	6728	15506			1.42397e+06	4.10478e+06	1.06214e+06	0.346906	0.258758	0.745902
631	0	6808	15506			1.39217e+06	4.33739e+06	1.09117e+06	0.32097	0.251573	0.783788
632	0	6888	15506			1891355	5740616	1445804	0.329469	0.251855	0.764428
633	0	6968	15506			2.11387e+06	6.04571e+06	1.47736e+06	0.349647	0.244365	0.698891
634	0	7048	15506			1779701	4.65817e+06	1.45284e+06	0.38206	0.31189	0.816337
635	0	7128	15506			1.7465e+06	4.61957e+06	1.31212e+06	0.378065	0.284035	0.751284
636	0	7208	15506			1.82714e+06	6185945	1562145	0.295369	0.252531	0.854969
637	0	7288	15506			2.10098e+06	5532822	1.48841e+06	0.37973	0.269014	0.708435
638	0	7368	15506			2.35407e+06	5.95841e+06	1.45438e+06	0.395084	0.244088	0.617813
639	0	7448	15506			2.32655e+06	5259862	1.26806e+06	0.442321	0.241083	0.545041
640	0	7528	15506			2.08851e+06	4.08352e+06	1.54904e+06	0.511449	0.37934	0.741695
641	0	7608	15506			1.91731e+06	4734651	1.3645e+06	0.404952	0.288195	0.711677
642	0	7688	15506			1.56106e+06	3.96991e+06	990747	0.393223	0.249564	0.634663
643	0	7768	15506			1295301	3608261	915945	0.358982	0.253847	0.707129
644	0	7848	15506			968481	2417673	815522	0.400584	0.337317	0.842062
645	0	7928	15506			712299	2.22976e+06	520454	0.319452	0.233413	0.730668
646	0	8008	15506			727142	2.13221e+06	587773	0.341027	0.275664	0.808334
647	0	1368	15426			660132	2.02414e+06	484712	0.326129	0.239465	0.734265
648	0	1448	15426			1.11088e+06	2.70833e+06	725137	0.410171	0.267743	0.652759
649	0	1528	15426			1.60256e+06	4.00833e+06	1.32716e+06	0.399808	0.331101	0.828149
650	0	1608	15426			2.35793e+06	4.50979e+06	1.25711e+06	0.522848	0.278751	0.53314
651	0	1688	15426			2.02122e+06	4515525	1.3483e+06	0.447616	0.298593	0.667074
652	0	1768	15426			2.67018e+06	6152884	1.59679e+06	0.433972	0.259518	0.598007
653	0	1848	15426			2.78926e+06	6662500	1.90062e+06	0.418651	0.285272	0.681407
654	0	1928	15426			2.17673e+06	6.11533e+06	1.66581e+06	0.355946	0.2724	0.765284
655	0	2008	15426			2.61208e+06	6270352	1.75452e+06	0.416576	0.279811	0.671694
656	0	2088	15426			2.82736e+06	6.92715e+06	1.86053e+06	0.408156	0.268585	0.658044
657	0	2168	15426			2.69932e+06	6.43516e+06	2.05991e+06	0.419464	0.320102	0.763122
658	0	2248	15426			3.07661e+06	7.28229e+06	1.97648e+06	0.422479	0.27141	0.642422
659	0	2328	15426			3416848	8922270	2.87615e+06	0.382957	0.322356	0.841755
660	0	2408	15426			3.72624e+06	11444819	3.43716e+06	0.325583	0.300324	0.922421
661	0	2488	15426			3.80289e+06	13997569	3.2004e+06	0.271682	0.22864	0.841571
662	0	2568	15426			3655576	13753304	3.43108e+06	0.265796	0.249473	0.938588
663	0	2648	15426			2.90937e+06	8.37762e+06	2.43032e+06	0.347279	0.290096	0.835339
664	0	2728	15426			2.80791e+06	8583114	2.72284e+06	0.327144	0.317232	0.969704
665	0	2808	15426			3436378	9335585	3.04686e+06	0.368095	0.326371	0.88665
666	0	2888	15426			3.01627e+06	9126668	3.19928e+06	0.33049	0.350542	1.06067
667	0	2968	15426			3.2914e+06	11524922	3.10179e+06	0.28559	0.269138	0.942392
668	0	3048	15426			3.12083e+06	8984044	2.81855e+06	0.347375	0.313728	0.903141
669	0	3128	15426			2.95179e+06	8452335	2.60886e+06	0.349228	0.308656	0.883822
670	0	3208	15426			2.27847e+06	7832379	2.36421e+06	0.290904	0.30185	1.03763
671	0	3288	15426			2.72282e+06	7736933	2.77527e+06	0.351925	0.358705	1.01926
672	0	3368	15426			3.02982e+06	10600356	3.30781e+06	0.285823	0.312047	1.09175
673	0	3448	15426			3.17258e+06	9838247	3.05593e+06	0.322474	0.310617	0.963231
674	0	3528	15426			3.06618e+06	8983617	2.60595e+06	0.341308	0.290078	0.8499
675	0	3608	15426			2.61292e+06	7.25306e+06	2.14792e+06	0.36025	0.29614	0.822039
676	0	3688	15426			2.30035e+06	6.69368e+06	2.22135e+06	0.34366	0.331858	0.965657
677	0	3768	15426			2.43767e+06	7.48267e+06	2.14401e+06	0.325775	0.28653	0.879533
678	0	3848	15426			3.15703e+06	8197070	2796812	0.385142	0.341197	0.885899
679	0	3928	15426			2.83427e+06	9338449	2.98996e+06	0.303506	0.320178	1.05493
680	0	4008	15426			2.81732e+06	7.31803e+06	2.19895e+06	0.384984	0.300484	0.780511
681	0	4088	15426			2379476	6.98817e+06	2191336	0.3405	0.313578	0.920932
682	0	4168	15426			3.4102e+06	7.32005e+06	2.2626e+06	0.465871	0.309097	0.663481
683	0	4248	15426			2.34432e+06	5.961e+06	1.98606e+06	0.393276	0.333175	0.847179
684	0	4328	15426			2.60505e+06	5905525	1838368	0.44112	0.311296	0.705695
685	0	4408	15426			3273449	7.87238e+06	2304259	0.415814	0.292702	0.703924
686	0	4488	15426			3143702	8748324	2.26107e+06	0.359349	0.258457	0.719237
687	0	4568	15426			3088292	8337220	2.40651e+06	0.370422	0.288647	0.779236
688	0	4648	15426			3.48058e+06	8683285	2438881	0.400836	0.280871	0.700712
689	0	4728	15426			3.92646e+06	9254330	2.79978e+06	0.424284	0.302537	0.713054
690	0	4808	15426			3.42783e+06	7.99809e+06	2.14363e+06	0.428581	0.268018	0.625362
691	0	4888	15426			2.89163e+06	6643518	1.87028e+06	0.435256	0.28152	0.646791
692	0	4968	15426			3.64005e+06	7.3176e+06	2.29379e+06	0.497438	0.313462	0.630154
693	0	5048	15426			3555205	7731634	1.98378e+06	0.459826	0.256579	0.557992
694	0	5128	15426			2.7749e+06	6591962	2141045	0.420952	0.324796	0.771577
695	0	5208	15426			3.20062e+06	6.67331e+06	1.87777e+06	0.479615	0.281385	0.58669
696	0	5288	15426			2722245	6.54604e+06	2.06102e+06	0.415861	0.31485	0.757103
697	0	5368	15426			2.53192e+06	6.95635e+06	2.02796e+06	0.363972	0.291527	0.80096
698	0	5448	15426			2.32203e+06	6.79511e+06	1.95386e+06	0.34172	0.287538	0.841444
699	0	5528	15426			2.45364e+06	6338964	2.14648e+06	0.387073	0.338616	0.874813
700	0	5608	15426			2.57852e+06	6470787	2.32015e+06	0.398486	0.358557	0.899798
701	0	5688	15426			2.12476e+06	6075820	2.04876e+06	0.349708	0.337199	0.96423
702	0	5768	15426			2.02017e+06	6057088	1.64684e+06	0.333522	0.271886	0.815195
703	0	5848	15426			2.6871e+06	6928113	1.99373e+06	0.387854	0.287774	0.741963
704	0	5928	15426			2388110	6.42877e+06	1.79259e+06	0.371472	0.278839	0.750633
705	0	6008	15426			2.40297e+06	6.77939e+06	2.00658e+06	0.354452	0.295983	0.835045
706	0	6088	15426			1.81311e+06	4.532e+06	1.27529e+06	0.400068	0.281397	0.703373
707	0	6168	15426			1.73792e+06	5276549	1.36084e+06	0.329367	0.257903	0.783026
708	0	6248	15426			1.9967e+06	5458472	1.43091e+06	0.365798	0.262144	0.716636
709	0	6328	15426			1.88943e+06	5777839	1.56914e+06	0.327013	0.271579	0.830484
710	0	6408	15426			2.18355e+06	6186921	1.5878e+06	0.35293	0.256639	0.727167
711	0	6488	15426			2.31744e+06	6483690	1.60448e+06	0.357427	0.247464	0.69235
712	0	6568	15426			1.94918e+06	5671135	1.72318e+06	0.343702	0.303851	0.884054
713	0	6648	15426			1.85593e+06	4835071	1.45109e+06	0.383847	0.300117	0.781867
714	0	6728	15426			1.28263e+06	4462943	1.21318e+06	0.287396	0.271834	0.945853
715	0	6808	15426			2.03341e+06	6.09054e+06	1.7313e+06	0.333864	0.284261	0.851427
716	0	6888	15426			2.5329e+06	7138715	1.78184e+06	0.354811	0.249602	0.703478
717	0	6968	15426			2.40874e+06	7.04315e+06	1.67462e+06	0.341997	0.237765	0.695226
718	0	7048	15426			1.87941e+06	6288449	1.48241e+06	0.298867	0.235735	0.788763
719	0	7128	15426			2.40064e+06	6.14225e+06	1.77949e+06	0.390841	0.289712	0.741254
720	0	7208	15426			2.45333e+06	6.9605e+06	1.80881e+06	0.352465	0.259868	0.737288
721	0	7288	15426			2756021	6.85454e+06	1.85893e+06	0.402073	0.271197	0.674498
722	0	7368	15426			2.41665e+06	6632138	1.67418e+06	0.364385	0.252434	0.692768
723	0	7448	15426			2575317	6119004	1.73676e+06	0.420872	0.28383	0.674385
724	0	7528	15426			2.30887e+06	6.56151e+06	1.66416e+06	0.35188	0.253624	0.720769
725	0	7608	15426			2176889	5.71685e+06	1.57478e+06	0.380785	0.275463	0.72341
726	0	7688	15426			2.0903e+06	4690284	1.56306e+06	0.445667	0.333256	0.747769
727	0	7768	15426			1604154	4.5967e+06	1.18152e+06	0.34898	0.257036	0.736537
728	0	7848	15426			1.31488e+06	3516183	1.00133e+06	0.373951	0.284777	0.761537
729	0	7928	15426			1127586	2.80981e+06	688902	0.401304	0.245177	0.610953
730	0	8008	15426			738340	2.38816e+06	732743	0.309167	0.306823	0.99242
731	0	8088	15426			1.13667e+06	3.09757e+06	830977	0.366954	0.268267	0.731064
732	0	8168	15426			1.14953e+06	3607622	801685	0.31864	0.22222	0.697402
733	0	1288	15346			1188799	2.5606e+06	759346	0.464267	0.296551	0.638751
734	0	1368	15346			1.00802e+06	2.82589e+06	791149	0.356707	0.279964	0.784857
735	0	1448	15346			1.19836e+06	3.40963e+06	810392	0.351463	0.237677	0.67625
736	0	1528	15346			1.97038e+06	4.54969e+06	1.3641e+06	0.43308	0.299821	0.6923
737	0	1608	15346			1.50744e+06	4559518	1132748	0.330613	0.248436	0.75144
738	0	1688	15346			1.96905e+06	4991651	1.2301e+06	0.394468	0.246431	0.624719
739	0	1768	15346			2.25708e+06	5732853	1.49702e+06	0.393709	0.26113	0.663257
740	0	1848	15346			2786577	6.69256e+06	1.99703e+06	0.41637	0.298396	0.716662
741	0	1928	15346			3.12928e+06	6.47048e+06	1.91323e+06	0.483624	0.295687	0.611398
742	0	2008	15346			3071621	7.5033e+06	2.3171e+06	0.409369	0.308811	0.754359
743	0	2088	15346			2.64973e+06	6.2967e+06	1.73286e+06	0.420812	0.275201	0.653977
744	0	2168	15346			3.30898e+06	7564996	2.17073e+06	0.437407	0.286945	0.656014
745	0	2248	15346			3.72101e+06	7780393	1.8841e+06	0.478254	0.24216	0.506342
746	0	2328	15346			2.65792e+06	7.08163e+06	2.20118e+06	0.375326	0.310829	0.828158
747	0	2408	15346			3.28302e+06	10007419	2.95052e+06	0.328058	0.294833	0.898723
748	0	2488	15346			3.752e+06	10077779	3.15247e+06	0.372304	0.312814	0.840212
749	0	2568	15346			3.54042e+06	11569017	3.65277e+06	0.306026	0.315738	1.03174
750	0	2648	15346			3.5342e+06	10777717	3.43787e+06	0.327917	0.318979	0.972744
751	0	2728	15346			2.93363e+06	8803021	2.99416e+06	0.333253	0.340129	1.02063
752	0	2808	15346			3.44678e+06	9017230	2.63569e+06	0.382244	0.292295	0.764682
753	0	2888	15346			3327853	10780410	3512000	0.308694	0.325776	1.05534
754	0	2968	15346			2.90278e+06	8433049	2.47146e+06	0.344214	0.293069	0.851414
755	0	3048	15346			2.32838e+06	7035231	2.30405e+06	0.33096	0.327502	0.989553
756	0	3128	15346			2.0175e+06	6.03354e+06	2003179	0.33438	0.332007	0.992904
757	0	3208	15346			2.56577e+06	8606076	3.21143e+06	0.298135	0.373159	1.25164
758	0	3288	15346			2.39623e+06	6574551	2.24179e+06	0.36447	0.34098	0.93555
759	0	3368	15346			2.18399e+06	7.84756e+06	2653242	0.278302	0.338098	1.21486
760	0	3448	15346			2597477	8.18123e+06	2.21581e+06	0.317492	0.27084	0.853061
761	0	3528	15346			2.0418e+06	6.96328e+06	2.29779e+06	0.293224	0.329987	1.12537
762	0	3608	15346			2.1887e+06	8507806	2399143	0.257258	0.281993	1.09615
763	0	3688	15346			2.14112e+06	6.7352e+06	2.27562e+06	0.3179	0.33787	1.06282
764	0	3768	15346			1.93967e+06	6.62478e+06	2.05094e+06	0.292791	0.309586	1.05736
765	0	3848	15346			2124532	6601209	2.21366e+06	0.32184	0.335342	1.04195
766	0	3928	15346			2.44862e+06	7105603	2.02642e+06	0.344604	0.285186	0.827575
767	0	4008	15346			2.46438e+06	6.65402e+06	1.82256e+06	0.370359	0.273903	0.739561
768	0	4088	15346			2.20115e+06	5589793	1756588	0.39378	0.314249	0.798032
769	0	4168	15346			1906705	6.25271e+06	1730824	0.30494	0.276812	0.907757
770	0	4248	15346			2519237	6.68369e+06	1.69586e+06	0.376923	0.253731	0.673165
771	0	4328	15346			2.49433e+06	6.84024e+06	2.23447e+06	0.364656	0.326665	0.895818
772	0	4408	15346			3.24689e+06	7.68586e+06	1.95372e+06	0.42245	0.254196	0.601719
773	0	4488	15346			2.84249e+06	7.73562e+06	2309092	0.367456	0.298501	0.812347
774	0	4568	15346			2.58053e+06	6.51835e+06	1.8024e+06	0.395887	0.276512	0.698461
775	0	4648	15346			3.28367e+06	7.97774e+06	2672665	0.411603	0.335015	0.813927
776	0	4728	15346			2.75155e+06	6.75102e+06	1.89321e+06	0.407575	0.280434	0.688054
777	0	4808	15346			3.3681e+06	8.10349e+06	2.45354e+06	0.415636	0.302776	0.728465
778	0	4888	15346			3.11996e+06	6601050	1.95934e+06	0.472647	0.296822	0.628
779	0	4968	15346			3.10461e+06	7226980	2.02309e+06	0.429586	0.279936	0.651642
780	0	5048	15346			3.07021e+06	6.83606e+06	1.94696e+06	0.44912	0.284807	0.634145
781	0	5128	15346			2.6764e+06	5.66927e+06	1.52368e+06	0.47209	0.268761	0.5693
782	0	5208	15346			2.45947e+06	5.922e+06	1943958	0.415311	0.32826	0.790397
783	0	5288	15346			2.56191e+06	6.45413e+06	1.97991e+06	0.396941	0.306767	0.772827
784	0	5368	15346			2.26801e+06	5.39846e+06	1.93561e+06	0.420122	0.358548	0.853438
785	0	5448	15346			1.66988e+06	4.86332e+06	1.25472e+06	0.343362	0.257996	0.751384
786	0	5528	15346			2.41267e+06	6.55416e+06	1.64006e+06	0.368113	0.250232	0.679768
787	0	5608	15346			2.65099e+06	6944951	2329969	0.381715	0.335491	0.878905
788	0	5688	15346			3.03457e+06	7397813	2.15925e+06	0.410198	0.291877	0.711552
789	0	5768	15346			2.66657e+06	7.4098e+06	2.16178e+06	0.35987	0.291746	0.810697
790	0	5848	15346			2.38526e+06	7093774	1.78611e+06	0.336247	0.251785	0.74881
791	0	5928	15346			1.79528e+06	4251349	1347793	0.422286	0.317027	0.750741
792	0	6008	15346			3.45554e+06	8904444	2.39772e+06	0.388069	0.269272	0.693878
793	0	6088	15346			1.62148e+06	5.37292e+06	1.38997e+06	0.301788	0.258699	0.857219
794	0	6168	15346			2.08365e+06	5488179	1.63466e+06	0.379661	0.29785	0.784516
795	0	6248	15346			2.37669e+06	6.76068e+06	1871953	0.351546	0.276888	0.78763
796	0	6328	15346			2.86887e+06	7.04488e+06	2252883	0.407227	0.31979	0.785287
797	0	6408	15346			2.21082e+06	6674230	2.00202e+06	0.331248	0.299963	0.905554
798	0	6488	15346			2.04238e+06	6680587	2.01576e+06	0.305718	0.301734	0.986967
799	0	6568	15346			1842516	5494119	1507130	0.335362	0.274317	0.817974
800	0	6648	15346			2.12694e+06	5126399	1.38259e+06	0.4149	0.269701	0.650037
801	0	6728	15346			1.85572e+06	6.07332e+06	1.73434e+06	0.305553	0.285567	0.934588
802	0	6808	15346			2.55826e+06	7079254	2.00234e+06	0.361374	0.282847	0.782698
803	0	6888	15346			2633609	8296096	2.03399e+06	0.317452	0.245175	0.772322
804	0	6968	15346			2.82005e+06	6940095	1.77873e+06	0.406341	0.256297	0.630744
805	0	7048	15346			2.71111e+06	6655129	1826034	0.407371	0.27438	0.673538
806	0	7128	15346			2533875	7424446	1.86784e+06	0.341288	0.25158	0.737148
807	0	7208	15346			2.89067e+06	7103059	2.035e+06	0.406961	0.286496	0.703988
808	0	7288	15346			2953434	6.94412e+06	1.98499e+06	0.425314	0.285852	0.672097
809	0	7368	15346			2.98082e+06	7596356	2.05068e+06	0.392401	0.269955	0.687958
810	0	7448	15346			2.40349e+06	6691832	1.81761e+06	0.359167	0.271616	0.756238
811	0	7528	15346			2.36892e+06	5.49737e+06	1.5387e+06	0.430919	0.279897	0.649535
812	0	7608	15346			2.65116e+06	5610635	1501948	0.472523	0.267697	0.566526
813	0	7688	15346			2332990	6.25874e+06	1.36081e+06	0.372757	0.217426	0.583292
814	0	7768	15346			2.1039e+06	5721177	1.42091e+06	0.367739	0.24836	0.67537
815	0	7848	15346			1808532	4.90039e+06	1379221	0.369059	0.281451	0.762619
816	0	7928	15346			1.76668e+06	4245141	1147742	0.416166	0.270366	0.649659
817	0	8008	15346			1.19833e+06	3.13135e+06	934261	0.382689	0.298357	0.779633
818	0	8088	15346			1.47012e+06	3429486	910952	0.428669	0.265623	0.619646
819	0	8168	15346			1.25151e+06	3.10329e+06	902980	0.403286	0.290975	0.72151
820	0	8248	15346			892322	2.51896e+06	643022	0.354243	0.255273	0.720617
821	0	1208	15266			1.53628e+06	4.0322e+06	1252730	0.381003	0.310681	0.81543
822	0	1288	15266			1.28831e+06	2.77602e+06	795812	0.464088	0.286674	0.617716
823	0	1368	15266			1.36134e+06	3.13802e+06	864507	0.433819	0.275494	0.635043
824	0	1448	15266			2.05821e+06	4169255	1316993	0.493664	0.315882	0.639873
825	0	1528	15266			1.99727e+06	4.86406e+06	1.54727e+06	0.410618	0.318102	0.77469
826	0	1608	15266			1.3596e+06	3.78868e+06	1.10604e+06	0.358858	0.291932	0.8135
827	0	1688	15266			1.93743e+06	4.56314e+06	1.09144e+06	0.424582	0.239186	0.563344
828	0	1768	15266			3.27243e+06	6.65178e+06	1.58956e+06	0.491962	0.238967	0.485743
829	0	1848	15266			3.67588e+06	8050375	1.98214e+06	0.456609	0.246217	0.539228
830	0	1928	15266			2.98124e+06	6.86616e+06	2.10058e+06	0.434193	0.305932	0.704599
831	0	2008	15266			2.40684e+06	5532196	1.57448e+06	0.43506	0.284604	0.654171
832	0	2088	15266			2500808	6400404	1.93119e+06	0.390727	0.30173	0.772227
833	0	2168	15266			3.05311e+06	6.7675e+06	1.71405e+06	0.451143	0.253277	0.561411
834	0	2248	15266			2.97046e+06	7013232	2.04746e+06	0.423551	0.291942	0.689273
835	0	2328	15266			3137883	8389683	2.5235e+06	0.374017	0.300787	0.804206
836	0	2408	15266			3340907	9888436	3.07524e+06	0.33786	0.310994	0.920481
837	0	2488	15266			3.68203e+06	11593697	3.75601e+06	0.317589	0.32397	1.02009
838	0	2568	15266			2811867	7.64741e+06	2.51213e+06	0.367689	0.328494	0.893402
839	0	2648	15266			2.44066e+06	7776358	2.26559e+06	0.313857	0.291344	0.928268
840	0	2728	15266			2.68507e+06	7.5342e+06	2538433	0.356384	0.336921	0.945389
841	0	2808	15266			2.32238e+06	7928194	2.68073e+06	0.292927	0.338127	1.1543
842	0	2888	15266			2.43335e+06	7.40599e+06	2.90952e+06	0.328565	0.39286	1.19568
843	0	2968	15266			1908729	5837874	1.95967e+06	0.326956	0.335682	1.02669
844	0	3048	15266			1.81542e+06	6.01864e+06	2.3662e+06	0.301632	0.393146	1.30339
845	0	3128	15266			1.78793e+06	5676605	1.71256e+06	0.314964	0.301687	0.957847
846	0	3208	15266			1.59661e+06	5.49097e+06	1.70191e+06	0.290769	0.309948	1.06596
847	0	3288	15266			1.77937e+06	5.81228e+06	1.80418e+06	0.306139	0.310407	1.01394
848	0	3368	15266			1.82509e+06	7.42618e+06	2463787	0.245764	0.33177	1.34996
849	0	3448	15266			2.21697e+06	7.64189e+06	2.5204e+06	0.290107	0.329814	1.13687
850	0	3528	15266			1.92566e+06	6865552	2303493	0.280481	0.335515	1.19621
851	0	3608	15266			2106939	7572270	2641339	0.278244	0.348817	1.25364
852	0	3688	15266			1.70891e+06	6893621	2.08062e+06	0.247898	0.301819	1.21751
853	0	3768	15266			1.42123e+06	6.34289e+06	1.76588e+06	0.224066	0.278403	1.2425
854	0	3848	15266			1.82432e+06	5373646	1.81643e+06	0.339494	0.338025	0.995673
855	0	3928	15266			1.72089e+06	5732675	1.68861e+06	0.30019	0.294558	0.981238
856	0	4008	15266			1.62546e+06	5.06283e+06	1.93433e+06	0.321057	0.382066	1.19002
857	0	4088	15266			1.76942e+06	5.58844e+06	1.55352e+06	0.316622	0.277989	0.877983
858	0	4168	15266			1653303	4522530	1445823	0.36557	0.319693	0.874506
859	0	4248	15266			1.87274e+06	5.01752e+06	1.7159e+06	0.37324	0.341982	0.916253
860	0	4328	15266			2.26634e+06	6170971	1.8831e+06	0.367259	0.305155	0.830898
861	0	4408	15266			2.94793e+06	6.9063e+06	2.07926e+06	0.426847	0.301067	0.705327
862	0	4488	15266			2170096	6.46689e+06	1.7716e+06	0.33557	0.273949	0.816369
863	0	4568	15266			2.6476e+06	6330512	1.82974e+06	0.418228	0.289035	0.691095
864	0	4648	15266			2.71497e+06	7.2423e+06	1.96466e+06	0.374877	0.271276	0.723642
865	0	4728	15266			3.04277e+06	7519778	2.05056e+06	0.404636	0.272689	0.673911
866	0	4808	15266			2.86836e+06	6.56826e+06	1.99929e+06	0.4367	0.304387	0.697016
867	0	4888	15266			3.21307e+06	8.00678e+06	2.39913e+06	0.401293	0.299637	0.746677
868	0	4968	15266			2657264	6.40704e+06	2.00762e+06	0.414741	0.313345	0.75552
869	0	5048	15266			2647633	6.42724e+06	2.14253e+06	0.41194	0.333352	0.809225
870	0	5128	15266			2613026	6492440	1.84031e+06	0.402472	0.283454	0.704283
871	0	5208	15266			2.98801e+06	5978321	2.02579e+06	0.499807	0.338856	0.677973
872	0	5288	15266			2.43261e+06	6.29842e+06	2015953	0.386226	0.320073	0.82872
873	0	5368	15266			1.94122e+06	5783453	1.76817e+06	0.335651	0.305729	0.910856
874	0	5448	15266			2.00469e+06	4.41857e+06	1474200	0.453697	0.333638	0.735375
875	0	5528	15266			2.11528e+06	7119365	2.35918e+06	0.297116	0.331375	1.1153
876	0	5608	15266			2291845	6278984	2.22888e+06	0.365003	0.354974	0.972525
877	0	5688	15266			2.59468e+06	7410290	2396348	0.350145	0.323381	0.923564
878	0	5768	15266			2.40496e+06	6501011	2212773	0.369936	0.340374	0.920089
879	0	5848	15266			1990527	5.55236e+06	1.39372e+06	0.358501	0.251014	0.700178
880	0	5928	15266			2783604	6414504	1.77311e+06	0.433955	0.276422	0.636983
881	0	6008	15266			2.20001e+06	6490018	2.00925e+06	0.338984	0.30959	0.913289
882	0	6088	15266			2.01802e+06	5695956	1.83265e+06	0.35429	0.321745	0.90814
883	0	6168	15266			2.45197e+06	7294676	2.24556e+06	0.336131	0.307836	0.915821
884	0	6248	15266			2.71281e+06	7798654	2.36996e+06	0.347856	0.303893	0.873618
885	0	6328	15266			3.0806e+06	8.21281e+06	2.45038e+06	0.375097	0.298361	0.795424
886	0	6408	15266			2.67032e+06	8694309	2550380	0.307134	0.293339	0.955084
887	0	6488	15266			2.7184e+06	7733880	2.1586e+06	0.351493	0.27911	0.794071
888	0	6568	15266			1.98746e+06	5.81681e+06	1.88353e+06	0.341675	0.323808	0.947707
889	0	6648	15266			2.1453e+06	6.65036e+06	1.96675e+06	0.322584	0.295736	0.916772
890	0	6728	15266			2.60996e+06	7884115	2.1774e+06	0.33104	0.276176	0.834267
891	0	6808	15266			2.71362e+06	6.81326e+06	2.09016e+06	0.398285	0.306778	0.770248
892	0	6888	15266			2.88954e+06	8.25736e+06	2482852	0.349934	0.300683	0.859257
893	0	6968	15266			2680592	7269818	2.0567e+06	0.368729	0.28291	0.767256
894	0	7048	15266			2.28854e+06	6497006	1.68103e+06	0.352245	0.258739	0.734541
895	0	7128	15266			2.76786e+06	7.32961e+06	2.12417e+06	0.377627	0.289806	0.767441
896	0	7208	15266			2.65706e+06	6.5391e+06	1.93568e+06	0.406335	0.296017	0.728504
897	0	7288	15266			2.84697e+06	7.71836e+06	2.28313e+06	0.368858	0.295805	0.801949
898	0	7368	15266			3.35165e+06	7.51583e+06	1.89961e+06	0.445946	0.252748	0.56677
899	0	7448	15266			2931681	7429636	1.86755e+06	0.394593	0.251365	0.637023
900	0	7528	15266			2.65267e+06	7.20955e+06	1.69864e+06	0.367938	0.235609	0.640349
901	0	7608	15266			2622165	7.5018e+06	1.94025e+06	0.349538	0.258638	0.739941
902	0	7688	15266			2.48854e+06	6.76291e+06	1.81854e+06	0.367968	0.2689	0.730768
903	0	7768	15266			2.30883e+06	6343374	1.72385e+06	0.363976	0.271756	0.746632
904	0	7848	15266			2576931	6.02712e+06	1.75268e+06	0.427556	0.290799	0.680143
905	0	7928	15266			2.07291e+06	5.03021e+06	1261256	0.412091	0.250736	0.608448
906	0	8008	15266			1.74917e+06	4265339	1.23297e+06	0.410088	0.289067	0.70489
907	0	8088	15266			2.10579e+06	4.92182e+06	1282650	0.427847	0.260605	0.609108
908	0	8168	15266			1593834	4.50976e+06	1170221	0.353419	0.259486	0.734218
909	0	8248	15266			1.50039e+06	3.51578e+06	923283	0.426759	0.262611	0.615361
910	0	8328	15266			914834	2529228	713854	0.361705	0.282242	0.780311
911	0	8408	15266			891080	2.4375e+06	606493	0.365571	0.248818	0.680627
912	0	1208	15186			1.6793e+06	4.63e+06	1.31536e+06	0.3627	0.284094	0.783276
913	0	1288	15186			1113220	2.45115e+06	775499	0.454162	0.316382	0.696627
914	0	1368	15186			1526476	3.30622e+06	948847	0.461698	0.286989	0.621593
915	0	1448	15186			1.75212e+06	5.23013e+06	1.312e+06	0.335005	0.250855	0.74881
916	0	1528	15186			2030489	4.68092e+06	1.45626e+06	0.43378	0.311105	0.717196
917	0	1608	15186			1.84864e+06	4629011	1.25912e+06	0.39936	0.272006	0.681105
918	0	1688	15186			2097845	4.67218e+06	1.39463e+06	0.449008	0.298497	0.664793
919	0	1768	15186			2.46341e+06	5.55524e+06	1.48104e+06	0.443438	0.266601	0.601214
920	0	1848	15186			2.79581e+06	6227980	2.02591e+06	0.448912	0.325292	0.724623
921	0	1928	15186			2.58968e+06	6212587	1.59479e+06	0.416844	0.256702	0.615823
922	0	2008	15186			2.49427e+06	6.33454e+06	1.88376e+06	0.393758	0.297379	0.755233
923	0	2088	15186			2.67219e+06	5.79446e+06	1.74483e+06	0.461162	0.30112	0.65296
924	0	2168	15186			2.397e+06	6186805	1.73107e+06	0.387437	0.2798	0.722182
925	0	2248	15186			2781873	6.74364e+06	1.77332e+06	0.412518	0.262961	0.637454
926	0	2328	15186			3431812	9477952	2736593	0.362084	0.288733	0.797419
927	0	2408	15186			3.06359e+06	8732576	3.00288e+06	0.350823	0.343871	0.980183
928	0	2488	15186			2.78671e+06	8947358	3.33654e+06	0.311456	0.372908	1.19731
929	0	2568	15186			2.30224e+06	6052731	2.10099e+06	0.380364	0.347115	0.912586
930	0	2648	15186			2.34782e+06	6546477	2.41014e+06	0.358638	0.368158	1.02654
931	0	2728	15186			2.28744e+06	8432920	2.78099e+06	0.271251	0.329777	1.21577
932	0	2808	15186			2.37442e+06	7099571	2345406	0.334446	0.330359	0.987779
933	0	2888	15186			1.5491e+06	5475441	1.85882e+06	0.282918	0.339483	1.19993
934	0	2968	15186			1.4172e+06	4.72174e+06	1.72902e+06	0.300144	0.366183	1.22002
935	0	3048	15186			1.46781e+06	5.75245e+06	1839054	0.255162	0.319699	1.25293
936	0	3128	15186			1.82125e+06	6.68425e+06	2.65255e+06	0.272468	0.396835	1.45645
937	0	3208	15186			1.87112e+06	5957022	2.07416e+06	0.314103	0.348187	1.10851
938	0	3288	15186			1.77773e+06	6.21618e+06	2.32134e+06	0.285985	0.373436	1.30579
939	0	3368	15186			2.02947e+06	7569234	2.7325e+06	0.268122	0.361001	1.34641
940	0	3448	15186			1.96666e+06	7.7632e+06	2.74828e+06	0.253331	0.354013	1.39744
941	0	3528	15186			1.63557e+06	5.89689e+06	1.83967e+06	0.277361	0.311973	1.12479
942	0	3608	15186			1.51954e+06	5.12861e+06	1.51133e+06	0.296286	0.294686	0.994598
943	0	3688	15186			1.787e+06	5.55981e+06	1.98526e+06	0.321414	0.357074	1.11095
944	0	3768	15186			1.68059e+06	5704144	1901754	0.294626	0.333399	1.1316
945	0	3848	15186			1.68174e+06	4.76867e+06	1.7947e+06	0.352663	0.376352	1.06717
946	0	3928	15186			1.36978e+06	5369981	1.55289e+06	0.25508	0.28918	1.13368
947	0	4008	15186			1.73308e+06	5311354	1.83344e+06	0.326297	0.345193	1.05791
948	0	4088	15186			1.60561e+06	4455987	1.36061e+06	0.360326	0.305344	0.847411
949	0	4168	15186			1.76383e+06	5.16771e+06	1.84713e+06	0.341318	0.357436	1.04722
950	0	4248	15186			1.67284e+06	5.50248e+06	2.02243e+06	0.304016	0.367548	1.20898
951	0	4328	15186			1.47313e+06	5494854	2.01154e+06	0.268093	0.366078	1.36549
952	0	4408	15186			1.3885e+06	4.86687e+06	1.52109e+06	0.285298	0.312541	1.09549
953	0	4488	15186			831688	3553662	913161	0.234037	0.256963	1.09796
954	0	4568	15186			2.26621e+06	6097716	1.84924e+06	0.371649	0.303268	0.816004
955	0	4648	15186			3335348	7246631	2.07716e+06	0.460262	0.286639	0.622773
956	0	4728	15186			2.81953e+06	7.73881e+06	2.49171e+06	0.364337	0.321977	0.883734
957	0	4808	15186			3.32294e+06	8900556	2.78267e+06	0.373341	0.31264	0.837413
958	0	4888	15186			2769419	7073907	2.01331e+06	0.391498	0.284611	0.726981
959	0	4968	15186			2.86515e+06	7.06498e+06	2.45497e+06	0.405543	0.347485	0.856837
960	0	5048	15186			3.18666e+06	7.07981e+06	2111149	0.450106	0.298193	0.662495
961	0	5128	15186			2.60573e+06	6.8738e+06	2.23209e+06	0.379082	0.324724	0.856607
962	0	5208	15186			2534085	6567479	2.03469e+06	0.385854	0.309813	0.80293
963	0	5288	15186			2.27045e+06	5881642	1.75596e+06	0.386024	0.298549	0.773395
964	0	5368	15186			2.29934e+06	5.25292e+06	1.76591e+06	0.437727	0.336177	0.768005
965	0	5448	15186			2785086	6.28667e+06	2.2383e+06	0.443015	0.356039	0.803673
966	0	5528	15186			2.32446e+06	5.35821e+06	1.71957e+06	0.433814	0.320922	0.73977
967	0	5608	15186			2.40437e+06	6726395	2.05567e+06	0.357454	0.305613	0.854972
968	0	5688	15186			2.58005e+06	7375901	2.21635e+06	0.349794	0.300485	0.859034
969	0	5768	15186			2.21663e+06	7.27326e+06	2.4576e+06	0.304764	0.337895	1.10871
970	0	5848	15186			1.99165e+06	6172649	2.01526e+06	0.322657	0.326482	1.01185
971	0	5928	15186			1.85596e+06	6673102	2.03526e+06	0.278125	0.304994	1.09661
972	0	6008	15186			2.59238e+06	6505480	2.00104e+06	0.398491	0.307593	0.771893
973	0	6088	15186			2446281	8542559	2.51792e+06	0.286364	0.29475	1.02929
974	0	6168	15186			2.87364e+06	9102775	2.61225e+06	0.315689	0.286972	0.909036
975	0	6248	15186			2.84224e+06	7986841	2279068	0.355866	0.285353	0.801855
976	0	6328	15186			2.69785e+06	7935337	2.56918e+06	0.339979	0.323764	0.952307
977	0	6408	15186			2577635	8711719	2.38167e+06	0.295881	0.273387	0.923974
978	0	6488	15186			2670948	7.97759e+06	2.37107e+06	0.334806	0.297216	0.887726
979	0	6568	15186			2.54324e+06	7.38963e+06	2.11168e+06	0.344163	0.285762	0.830311
980	0	6648	15186			2.16921e+06	7159905	2.1843e+06	0.302966	0.305074	1.00696
981	0	6728	15186			3.21485e+06	8473925	2.41337e+06	0.379382	0.2848	0.750695
982	0	6808	15186			3.23092e+06	8659997	2.69328e+06	0.373085	0.311002	0.833595
983	0	6888	15186			3.26718e+06	7.92812e+06	1.95487e+06	0.4121	0.246574	0.598335
984	0	6968	15186			3.22412e+06	7.73883e+06	2.43195e+06	0.416617	0.314253	0.754297
985	0	7048	15186			3.16883e+06	7.81322e+06	2052198	0.405573	0.262657	0.647621
986	0	7128	15186			2.67264e+06	7136821	2.14014e+06	0.374486	0.299873	0.800757
987	0	7208	15186			2566062	6.43108e+06	2.0577e+06	0.39901	0.319962	0.801891
988	0	7288	15186			2.83116e+06	7758753	2292797	0.364899	0.295511	0.809844
989	0	7368	15186			2835811	7680247	1.85899e+06	0.369234	0.242048	0.655541
990	0	7448	15186			3.20461e+06	8420615	2.28422e+06	0.380568	0.271265	0.712792
991	0	7528	15186			2.89337e+06	7432384	2.13966e+06	0.389293	0.287884	0.739506
992	0	7608	15186			3.06397e+06	7.02732e+06	1.78099e+06	0.436008	0.253439	0.58127
993	0	7688	15186			2.82661e+06	6.79966e+06	1.95629e+06	0.415699	0.287704	0.692097
994	0	7768	15186			2633665	6326669	1.94494e+06	0.41628	0.30742	0.738492
995	0	7848	15186			2.65306e+06	6.31582e+06	1.66149e+06	0.420065	0.263068	0.626255
996	0	7928	15186			2.42502e+06	5.606e+06	1.49017e+06	0.432575	0.265817	0.614498
997	0	8008	15186			2147350	5019099	1.32614e+06	0.427836	0.264218	0.617569
998	0	8088	15186			1.98713e+06	4.87678e+06	1.30572e+06	0.407468	0.267743	0.65709
999	0	8168	15186			1.79647e+06	3.99235e+06	1254452	0.449978	0.314214	0.698289
1000	0	8248	15186			1.59436e+06	3926777	1.12725e+06	0.406022	0.287067	0.707024
1001	0	8328	15186			1.3161e+06	3.11812e+06	895125	0.422079	0.287072	0.680137
1002	0	8408	15186			917112	2.0956e+06	549468	0.437636	0.262201	0.599129
1003	0	8488	15186			627966	1.70386e+06	526787	0.368555	0.309173	0.838878
1004	0	1128	15106			1.92683e+06	4383698	1.45047e+06	0.439543	0.330879	0.752778
1005	0	1208	15106			1.14026e+06	3.14655e+06	1.11885e+06	0.362384	0.355581	0.981225
1006	0	1288	15106			1.74476e+06	3.5227e+06	1104920	0.49529	0.313657	0.63328
1007	0	1368	15106			1.95193e+06	3.73368e+06	1.21641e+06	0.522789	0.325795	0.623186
1008	0	1448	15106			2.73033e+06	5.3103e+06	1.17119e+06	0.514158	0.22055	0.428955
1009	0	1528	15106			2.03602e+06	4.06138e+06	952293	0.501313	0.234475	0.467722
1010	0	1608	15106			1927852	4.17247e+06	1.13565e+06	0.46204	0.272176	0.589074
1011	0	1688	15106			2.47071e+06	4618780	1.45738e+06	0.534927	0.315533	0.589863
1012	0	1768	15106			1.79634e+06	4.19373e+06	1189832	0.428339	0.283717	0.662365
1013	0	1848	15106			1.84947e+06	4261015	1.40388e+06	0.434045	0.32947	0.759069
1014	0	1928	15106			2.81404e+06	6132295	1.99156e+06	0.458889	0.324765	0.707722
1015	0	2008	15106			1.7207e+06	4540505	1.24204e+06	0.378968	0.273547	0.721822
1016	0	2088	15106			1.58268e+06	3.84922e+06	1366103	0.411168	0.354903	0.86316
1017	0	2168	15106			2394328	6.08915e+06	2.05753e+06	0.393212	0.337901	0.859336
1018	0	2248	15106			2.49732e+06	5.87745e+06	2020491	0.424899	0.34377	0.809063
1019	0	2328	15106			2.89298e+06	7.98767e+06	2.0877e+06	0.36218	0.261365	0.721643
1020	0	2408	15106			2.26937e+06	7.70424e+06	2.61869e+06	0.294561	0.339902	1.15393
1021	0	2488	15106			2.14192e+06	6796645	2.05029e+06	0.315144	0.301662	0.957221
1022	0	2568	15106			1.24083e+06	4.11574e+06	1.2081e+06	0.301486	0.293532	0.973618
1023	0	2648	15106			1.29225e+06	4128054	1.59927e+06	0.313041	0.387416	1.23759
1024	0	2728	15106			1934418	6.31191e+06	2.17854e+06	0.306471	0.345148	1.1262
1025	0	2808	15106			1487875	5226684	1.94039e+06	0.284669	0.371247	1.30413
1026	0	2888	15106			1.07059e+06	4.17125e+06	1.53342e+06	0.256658	0.367616	1.43232
1027	0	2968	15106			1.42532e+06	6509366	2.20689e+06	0.218965	0.339034	1.54835
1028	0	3048	15106			1.91582e+06	7122404	2.26663e+06	0.268985	0.31824	1.18311
1029	0	3128	15106			1.60535e+06	5.88823e+06	1.92361e+06	0.272638	0.326687	1.19824
1030	0	3208	15106			1744608	6700056	2.41386e+06	0.260387	0.360275	1.38361
1031	0	3288	15106			1.9309e+06	6.91842e+06	2.59641e+06	0.279095	0.375289	1.34466
1032	0	3368	15106			1.33239e+06	8427942	2.79783e+06	0.158092	0.331971	2.09986
1033	0	3448	15106			2.14375e+06	11121541	3.23001e+06	0.192757	0.290428	1.50671
1034	0	3528	15106			1.81428e+06	6851407	2413185	0.264804	0.352217	1.33011
1035	0	3608	15106			1587847	6.1171e+06	1.95659e+06	0.259575	0.319856	1.23223
1036	0	3688	15106			1.31848e+06	5279910	1.88675e+06	0.249717	0.357344	1.431
1037	0	3768	15106			1.34903e+06	5487005	1828329	0.245858	0.333211	1.3553
1038	0	3848	15106			1.1224e+06	4.77959e+06	1.46095e+06	0.234832	0.305665	1.30163
1039	0	3928	15106			1.24547e+06	4.9536e+06	1.73091e+06	0.251426	0.349425	1.38977
1040	0	4008	15106			1.74195e+06	6.12658e+06	1.96955e+06	0.284326	0.321477	1.13066
1041	0	4088	15106			1.23231e+06	4.96636e+06	1.43012e+06	0.248131	0.287961	1.16052
1042	0	4168	15106			1.09968e+06	4395610	1.55407e+06	0.250176	0.353551	1.41321
1043	0	4248	15106			1.28753e+06	7.03724e+06	2.16133e+06	0.18296	0.307128	1.67866
1044	0	4328	15106			1.51885e+06	4.50188e+06	1.60224e+06	0.337381	0.355904	1.0549
1045	0	4408	15106			1.44118e+06	3.87822e+06	1.54842e+06	0.371609	0.399261	1.07441
1046	0	4488	15106			1.42421e+06	4.39899e+06	1.65598e+06	0.323758	0.376446	1.16274
1047	0	4568	15106			1.95999e+06	5033095	1.52014e+06	0.389421	0.302029	0.775584
1048	0	4648	15106			1.95124e+06	5.96691e+06	1609001	0.327011	0.269654	0.824603
1049	0	4728	15106			2464824	5959956	1.89773e+06	0.413564	0.318414	0.769927
1050	0	4808	15106			2.42119e+06	6583217	2.16583e+06	0.367783	0.328993	0.89453
1051	0	4888	15106			2.43455e+06	5794259	1.87851e+06	0.420165	0.324202	0.771605
1052	0	4968	15106			1.85133e+06	4715063	1547595	0.392642	0.328224	0.835935
1053	0	5048	15106			2.16419e+06	5016116	1499818	0.431448	0.299	0.693015
1054	0	5128	15106			1.98885e+06	6002262	2.02431e+06	0.33135	0.337257	1.01783
1055	0	5208	15106			2.49226e+06	6247578	2.42781e+06	0.398916	0.3886	0.97414
1056	0	5288	15106			2.3378e+06	6185504	2.01725e+06	0.377947	0.326125	0.862886
1057	0	5368	15106			1.78871e+06	5.5318e+06	1.58581e+06	0.323351	0.286671	0.886564
1058	0	5448	15106			1.75948e+06	4349648	1.56173e+06	0.404511	0.359046	0.887607
1059	0	5528	15106			1.60428e+06	5.16531e+06	1.65546e+06	0.310587	0.320496	1.03191
1060	0	5608	15106			1930207	5.3697e+06	1.71907e+06	0.359463	0.320143	0.890614
1061	0	5688	15106			2.01327e+06	6.72789e+06	2.27013e+06	0.299243	0.33742	1.12758
1062	0	5768	15106			2337337	6.97615e+06	2.42788e+06	0.335047	0.348025	1.03874
1063	0	5848	15106			2.3222e+06	7.22768e+06	2.67007e+06	0.321293	0.369424	1.1498
1064	0	5928	15106			2.70687e+06	8.09499e+06	2.52568e+06	0.334388	0.312005	0.933062
1065	0	6008	15106			2.68007e+06	9772417	3.10842e+06	0.274249	0.318081	1.15983
1066	0	6088	15106			2.62228e+06	8727659	2819186	0.300456	0.323017	1.07509
1067	0	6168	15106			2.326e+06	8215700	2.72495e+06	0.283116	0.331676	1.17152
1068	0	6248	15106			2490920	8765338	3448665	0.284178	0.393443	1.38449
1069	0	6328	15106			2.66941e+06	8906187	3.37581e+06	0.299725	0.379041	1.26463
1070	0	6408	15106			3.51997e+06	10084233	3103248	0.349057	0.307733	0.881612
1071	0	6488	15106			2.73922e+06	8558916	2.89579e+06	0.320043	0.338336	1.05716
1072	0	6568	15106			2.25933e+06	7.68067e+06	2.31889e+06	0.294158	0.301912	1.02636
1073	0	6648	15106			2.68964e+06	8853630	2.48628e+06	0.30379	0.280821	0.924392
1074	0	6728	15106			3.01732e+06	8793782	2683567	0.34312	0.305166	0.889386
1075	0	6808	15106			3.31956e+06	9763158	2488274	0.340009	0.254864	0.749579
1076	0	6888	15106			2.99622e+06	8.28112e+06	2.44624e+06	0.361814	0.2954	0.816442
1077	0	6968	15106			3.24136e+06	8773669	2594050	0.369442	0.295663	0.800296
1078	0	7048	15106			3118639	8594307	2690962	0.362873	0.31311	0.862864
1079	0	7128	15106			2.9575e+06	8640593	2.42197e+06	0.34228	0.280302	0.818925
1080	0	7208	15106			3.41349e+06	9186792	2.57301e+06	0.371565	0.280077	0.753775
1081	0	7288	15106			3030399	7.80549e+06	2235502	0.388239	0.286401	0.737692
1082	0	7368	15106			3.47585e+06	8749543	2.5138e+06	0.397261	0.287306	0.723218
1083	0	7448	15106			3.00174e+06	8848246	2391282	0.339247	0.270255	0.796633
1084	0	7528	15106			3344052	8.19278e+06	2448991	0.40817	0.298921	0.732342
1085	0	7608	15106			2764036	6409822	1.66977e+06	0.431219	0.260501	0.604104
1086	0	7688	15106			3442184	7.06839e+06	1.77503e+06	0.486983	0.251122	0.515669
1087	0	7768	15106			2.15154e+06	5.38487e+06	1.64563e+06	0.399554	0.305602	0.764859
1088	0	7848	15106			2271390	5.22832e+06	1.56011e+06	0.43444	0.298396	0.686854
1089	0	7928	15106			2.28069e+06	5.2337e+06	1.49637e+06	0.435769	0.285911	0.656107
1090	0	8008	15106			2593861	5.07537e+06	1400327	0.511068	0.275906	0.539862
1091	0	8088	15106			1.98412e+06	4727148	1.22511e+06	0.419728	0.259165	0.617459
1092	0	8168	15106			2277259	5.47001e+06	1.39817e+06	0.416317	0.255607	0.613972
1093	0	8248	15106			2.30292e+06	4.87551e+06	1.6117e+06	0.472345	0.330572	0.699852
1094	0	8328	15106			1.47867e+06	3.58873e+06	731111	0.412032	0.203724	0.494438
1095	0	8408	15106			1251410	2817330	734855	0.444183	0.260834	0.587221
1096	0	8488	15106			555661	1539158	441460	0.361016	0.286819	0.794478
1097	0	8568	15106			193890	459999	119636	0.421501	0.260078	0.617028
1098	0	8648	15106			388990	775772	213952	0.501423	0.275792	0.55002
1099	0	1048	15026			3.72829e+06	9026079	3.02014e+06	0.413057	0.334601	0.810059
1100	0	1128	15026			2.21851e+06	5.5627e+06	1.69858e+06	0.398818	0.305352	0.765643
1101	0	1208	15026			2.25668e+06	4.92092e+06	1.35155e+06	0.458589	0.274654	0.598912
1102	0	1288	15026			2.80754e+06	6.61244e+06	1.80077e+06	0.424585	0.272331	0.641406
1103	0	1368	15026			2477512	5.07374e+06	1.36457e+06	0.488301	0.268948	0.550784
1104	0	1448	15026			3.03619e+06	6.09825e+06	1.35815e+06	0.497879	0.222712	0.447321
1105	0	1528	15026			2.20078e+06	4260733	1.15264e+06	0.516527	0.270526	0.523741
1106	0	1608	15026			1935651	3439545	1339483	0.562764	0.389436	0.692006
1107	0	1688	15026			1.80889e+06	4.65093e+06	1.32743e+06	0.388931	0.285411	0.733835
1108	0	1768	15026			2125316	5.31134e+06	1.39687e+06	0.400147	0.262998	0.657253
1109	0	1848	15026			2.06427e+06	4687840	1.34557e+06	0.440345	0.287034	0.651838
1110	0	1928	15026			2644876	5.94828e+06	1.66816e+06	0.444645	0.280443	0.630712
1111	0	2008	15026			2.58975e+06	5.84721e+06	2.00542e+06	0.442903	0.342971	0.774369
1112	0	2088	15026			2554777	6109862	1.89408e+06	0.41814	0.310004	0.741388
1113	0	2168	15026			1.99127e+06	5.58768e+06	1.94287e+06	0.356368	0.347706	0.975694
1114	0	2248	15026			2.05859e+06	5.42186e+06	1.80188e+06	0.379683	0.332337	0.8753
1115	0	2328	15026			2.57358e+06	7.30304e+06	2.60555e+06	0.352398	0.356775	1.01242
1116	0	2408	15026			2.47057e+06	7884707	3166574	0.313337	0.40161	1.28172
1117	0	2488	15026			1.69865e+06	5.09078e+06	2.16619e+06	0.333673	0.425512	1.27524
1118	0	2568	15026			524675	1.67462e+06	517230	0.313309	0.308863	0.98581
1119	0	2648	15026			103076	583046	222663	0.176789	0.381896	2.16018
1120	0	2728	15026			339707	1.38832e+06	546102	0.24469	0.393356	1.60757
1121	0	2808	15026			726848	4486835	1.31138e+06	0.161996	0.292273	1.8042
1122	0	2888	15026			1.48148e+06	10229451	2900767	0.144825	0.28357	1.95802
1123	0	2968	15026			1.68743e+06	8.35889e+06	2.8187e+06	0.201873	0.33721	1.67041
1124	0	3048	15026			1.69441e+06	6.68285e+06	2537522	0.253546	0.379707	1.49758
1125	0	3128	15026			1.45163e+06	5.5578e+06	2.34989e+06	0.261188	0.422809	1.61879
1126	0	3208	15026			1.51844e+06	4.99799e+06	1.81952e+06	0.30381	0.364051	1.19829
1127	0	3288	15026			1.44025e+06	6299590	2.13841e+06	0.228626	0.339452	1.48475
1128	0	3368	15026			519214	3.4953e+06	1.11704e+06	0.148546	0.319585	2.15142
1129	0	3448	15026			1.2113e+06	6.16812e+06	2.26161e+06	0.19638	0.36666	1.8671
1130	0	3528	15026			1460971	6124162	2.45086e+06	0.238559	0.400196	1.67756
1131	0	3608	15026			917894	4.28735e+06	1.63224e+06	0.214094	0.38071	1.77824
1132	0	3688	15026			845717	3812615	1.26993e+06	0.221821	0.333086	1.5016
1133	0	3768	15026			530302	3.10142e+06	1.08199e+06	0.170987	0.348869	2.04032
1134	0	3848	15026			135583	1.1949e+06	410683	0.113468	0.343696	3.02902
1135	0	3928	15026			197623	1.53143e+06	336160	0.129045	0.219507	1.70102
1136	0	4008	15026			749091	4.19902e+06	1516730	0.178397	0.36121	2.02476
1137	0	4088	15026			464399	2.61144e+06	957282	0.177833	0.366572	2.06133
1138	0	4168	15026			826594	4.33437e+06	1.1614e+06	0.190707	0.267951	1.40504
1139	0	4248	15026			581707	4751160	1.39599e+06	0.122435	0.29382	2.39981
1140	0	4328	15026			1.40521e+06	5.23819e+06	1.65505e+06	0.268263	0.315959	1.1778
1141	0	4408	15026			1.11172e+06	4395088	1290403	0.252946	0.293601	1.16073
1142	0	4488	15026			1.75741e+06	4399832	1.36138e+06	0.399427	0.309417	0.774653
1143	0	4568	15026			1.80099e+06	4.58801e+06	1.50883e+06	0.392542	0.328863	0.837778
1144	0	4648	15026			1910764	4799041	1.49763e+06	0.398155	0.312069	0.783786
1145	0	4728	15026			1.46228e+06	5.46821e+06	1.78527e+06	0.267414	0.326482	1.22089
1146	0	4808	15026			1.83299e+06	5.09885e+06	2.04633e+06	0.359491	0.401333	1.11639
1147	0	4888	15026			1.62058e+06	4.56115e+06	1.60104e+06	0.3553	0.351017	0.987945
1148	0	4968	15026			2.19565e+06	5344686	1.81032e+06	0.410809	0.338713	0.824503
1149	0	5048	15026			2.04071e+06	5.59672e+06	1.82116e+06	0.364626	0.325398	0.892415
1150	0	5128	15026			2.29317e+06	5.94704e+06	1.6702e+06	0.385598	0.280846	0.728338
1151	0	5208	15026			1.96799e+06	5433665	1932577	0.362186	0.355667	0.982003
1152	0	5288	15026			1.62585e+06	4.63011e+06	1.38478e+06	0.351146	0.299081	0.851728
1153	0	5368	15026			1.36129e+06	3.75241e+06	1.36574e+06	0.362777	0.363963	1.00327
1154	0	5448	15026			1.31776e+06	4235430	1.34136e+06	0.311129	0.316699	1.01791
1155	0	5528	15026			1.2036e+06	3.35707e+06	1.26081e+06	0.358527	0.375568	1.04753
1156	0	5608	15026			1.10819e+06	3.91203e+06	1.05252e+06	0.283278	0.269046	0.94976
1157	0	5688	15026			1687804	5298020	1.5894e+06	0.318573	0.299998	0.941694
1158	0	5768	15026			1.71138e+06	4997935	1.72168e+06	0.342418	0.344478	1.00601
1159	0	5848	15026			3.65652e+06	10969411	3.48948e+06	0.333338	0.31811	0.954316
1160	0	5928	15026			3632808	10307726	3.57253e+06	0.352435	0.346587	0.983406
1161	0	6008	15026			3.56491e+06	11232220	3.60616e+06	0.317382	0.321055	1.01157
1162	0	6088	15026			2.59973e+06	7992410	2.90943e+06	0.325275	0.364024	1.11913
1163	0	6168	15026			3.73238e+06	14818859	4.31814e+06	0.251867	0.291395	1.15694
1164	0	6248	15026			3276030	11560353	3.8269e+06	0.283385	0.331037	1.16815
1165	0	6328	15026			2.82136e+06	9004452	3161932	0.313329	0.351152	1.12071
1166	0	6408	15026			2.07125e+06	6.25744e+06	2.03733e+06	0.331006	0.325584	0.983621
1167	0	6488	15026			2490469	8449238	3.06445e+06	0.294757	0.36269	1.23047
1168	0	6568	15026			3.05565e+06	10297987	2.901e+06	0.296723	0.281706	0.949389
1169	0	6648	15026			2794874	9259411	2.63135e+06	0.301841	0.284181	0.941492
1170	0	6728	15026			3.39405e+06	8968001	2.76695e+06	0.378462	0.308536	0.815237
1171	0	6808	15026			2.49431e+06	7177698	2.43142e+06	0.347508	0.338746	0.974787
1172	0	6888	15026			3212649	7724375	2546357	0.415911	0.329652	0.792604
1173	0	6968	15026			3.01397e+06	7.99247e+06	2.15183e+06	0.377101	0.269232	0.713952
1174	0	7048	15026			2.80002e+06	7.59519e+06	2.32796e+06	0.368658	0.306505	0.831408
1175	0	7128	15026			2.91488e+06	7.89948e+06	2.29928e+06	0.368996	0.291067	0.788808
1176	0	7208	15026			3.45007e+06	9380737	2.7775e+06	0.367782	0.296086	0.805056
1177	0	7288	15026			3.63708e+06	8606308	2698961	0.422607	0.313603	0.742067
1178	0	7368	15026			3444390	9992651	2.97789e+06	0.344692	0.298008	0.864564
1179	0	7448	15026			3.56863e+06	10071815	2.60037e+06	0.354318	0.258183	0.728675
1180	0	7528	15026			3.16926e+06	8626941	2.2909e+06	0.367367	0.265552	0.722852
1181	0	7608	15026			3.17561e+06	7.14935e+06	2.06604e+06	0.444181	0.288983	0.650597
1182	0	7688	15026			3.10611e+06	6631851	1.8538e+06	0.468362	0.27953	0.596825
1183	0	7768	15026			2.99803e+06	6.55945e+06	1.90741e+06	0.457055	0.290789	0.636222
1184	0	7848	15026			2.74984e+06	5969651	1.79065e+06	0.460636	0.299959	0.651184
1185	0	7928	15026			2.55027e+06	5352000	1.72808e+06	0.476508	0.322885	0.677606
1186	0	8008	15026			2.48749e+06	6.23726e+06	1.48884e+06	0.39881	0.238701	0.598533
1187	0	8088	15026			2.12911e+06	5.73332e+06	1.57252e+06	0.371357	0.274278	0.738583
1188	0	8168	15026			2.97499e+06	6.55362e+06	1.87508e+06	0.453947	0.286113	0.63028
1189	0	8248	15026			2.21907e+06	5656722	1.4991e+06	0.392289	0.265013	0.675555
1190	0	8328	15026			1.89052e+06	4547660	1349735	0.415714	0.296798	0.713947
1191	0	8408	15026			1410339	3.54302e+06	748983	0.398061	0.211397	0.531066
1192	0	8488	15026			895591	2.54567e+06	566089	0.35181	0.222373	0.632084
1193	0	8568	15026			669670	1.68863e+06	428346	0.396577	0.253666	0.639638
1194	0	8648	15026			375919	1073909	259371	0.350047	0.241521	0.689967
1195	0	8728	15026			984810	2.27152e+06	652193	0.433548	0.287118	0.662252
1196	0	8808	15026			584820	1.52754e+06	339516	0.382851	0.222264	0.580549
1197	0	968	14946			2.86394e+06	6354088	2.31674e+06	0.450724	0.364607	0.808935
1198	0	1048	14946			3.11092e+06	7857489	2.68425e+06	0.395918	0.341617	0.862847
1199	0	1128	14946			3.24917e+06	7470347	2.2955e+06	0.434943	0.307281	0.706487
1200	0	1208	14946			2978950	5.96732e+06	1.9418e+06	0.49921	0.325406	0.651842
1201	0	1288	14946			2558738	5913710	1.43988e+06	0.432679	0.243481	0.562729
1202	0	1368	14946			1.9302e+06	5015596	1.39176e+06	0.384839	0.277487	0.721046
1203	0	1448	14946			2150161	4.70924e+06	1.35487e+06	0.456583	0.287703	0.630123
1204	0	1528	14946			1.76218e+06	3835700	1.12466e+06	0.459415	0.293208	0.638222
1205	0	1608	14946			2.00998e+06	4677463	1.476e+06	0.429717	0.315556	0.734334
1206	0	1688	14946			2.51965e+06	5705696	1.69607e+06	0.441603	0.29726	0.673137
1207	0	1768	14946			1949003	3.65449e+06	1.15927e+06	0.533317	0.317217	0.594799
1208	0	1848	14946			1.89178e+06	3.93281e+06	1.30799e+06	0.481026	0.332585	0.691408
1209	0	1928	14946			2.07239e+06	5.30541e+06	1627219	0.390618	0.306709	0.785191
1210	0	2008	14946			1.781e+06	5348119	1.53322e+06	0.333014	0.286684	0.860877
1211	0	2088	14946			2.46734e+06	6.03725e+06	2.18189e+06	0.408686	0.361405	0.884311
1212	0	2168	14946			2.00993e+06	5.60698e+06	1.80787e+06	0.358469	0.322433	0.89947
1213	0	2248	14946			1.58106e+06	4641048	1.65176e+06	0.34067	0.355902	1.04471
1214	0	2328	14946			1.95165e+06	4889637	1.82622e+06	0.39914	0.373489	0.935733
1215	0	2408	14946			1.40481e+06	4526044	1.7748e+06	0.310384	0.392129	1.26337
1216	0	2488	14946			1.1992e+06	3.44242e+06	1.29421e+06	0.348358	0.375958	1.07923
1217	0	2568	14946			190147	916533	373402	0.207463	0.407407	1.96376
1218	0	2648	14946			91814.5	626244	158135	0.146611	0.252513	1.72233
1219	0	2728	14946			1.27202e+06	9531562	2.58847e+06	0.133454	0.271568	2.03492
1220	0	2808	14946			953303	5.89917e+06	1.77903e+06	0.161599	0.301572	1.86617
1221	0	2888	14946			955523	5.46148e+06	1.70098e+06	0.174957	0.31145	1.78015
1222	0	2968	14946			1.12713e+06	4.11086e+06	1.88853e+06	0.274183	0.4594	1.67552
1223	0	3048	14946			1.20759e+06	5329815	2.21476e+06	0.226573	0.415541	1.83403
1224	0	3128	14946			1532987	5.97104e+06	1943035	0.256737	0.32541	1.26748
1225	0	3208	14946			1.35913e+06	6041664	2.03498e+06	0.22496	0.336824	1.49726
1226	0	3288	14946			1644631	5.99411e+06	2.20396e+06	0.274375	0.367687	1.34009
1227	0	3368	14946			1.64351e+06	6094084	2073597	0.269689	0.340264	1.26169
1228	0	3448	14946			1.68463e+06	7137936	2.03036e+06	0.236011	0.284447	1.20522
1229	0	3528	14946			1.29696e+06	6038733	1.99302e+06	0.214774	0.33004	1.53668
1230	0	3608	14946			473659	3.63035e+06	1.14243e+06	0.130472	0.314689	2.41193
1231	0	3688	14946			556900	3.05449e+06	1.10243e+06	0.182322	0.360923	1.97959
1232	0	3768	14946			437263	3.10824e+06	1.24948e+06	0.140679	0.401991	2.85752
1233	0	3848	14946			504590	4256977	1.12869e+06	0.118533	0.265138	2.23683
1234	0	3928	14946			316278	2.07203e+06	723782	0.152642	0.349311	2.28843
1235	0	4008	14946			348814	2.14834e+06	645068	0.162364	0.300264	1.84932
1236	0	4088	14946			1.09998e+06	5392183	1.86173e+06	0.203995	0.345265	1.69252
1237	0	4168	14946			1208257	6.06254e+06	2.03414e+06	0.199299	0.335526	1.68353
1238	0	4248	14946			1.58478e+06	5584493	1.76602e+06	0.283783	0.316236	1.11436
1239	0	4328	14946			1.31018e+06	5.58466e+06	1.71375e+06	0.234603	0.306867	1.30803
1240	0	4408	14946			1.82375e+06	5236253	1.7931e+06	0.348293	0.342439	0.983193
1241	0	4488	14946			1.77988e+06	5.64736e+06	1.5627e+06	0.315171	0.276713	0.877978
1242	0	4568	14946			1.54785e+06	4388605	1.32685e+06	0.352698	0.302339	0.857217
1243	0	4648	14946			1291089	3.83032e+06	1.2301e+06	0.337071	0.321149	0.952763
1244	0	4728	14946			2.00415e+06	5331952	1.88822e+06	0.375875	0.354132	0.942153
1245	0	4808	14946			2.04814e+06	5.78119e+06	1.92679e+06	0.354277	0.333286	0.940751
1246	0	4888	14946			1.93227e+06	6260563	2.01524e+06	0.308641	0.321894	1.04294
1247	0	4968	14946			2.26364e+06	6438696	2.48236e+06	0.351568	0.385537	1.09662
1248	0	5048	14946			1.97164e+06	6.26e+06	2.02266e+06	0.314959	0.323109	1.02588
1249	0	5128	14946			2.22762e+06	5874360	2.33935e+06	0.37921	0.39823	1.05016
1250	0	5208	14946			2.22902e+06	6.50112e+06	2.37073e+06	0.342867	0.364665	1.06358
1251	0	5288	14946			1.39827e+06	3.67093e+06	1.25439e+06	0.380905	0.34171	0.897099
1252	0	5368	14946			1884434	3.99652e+06	1.29263e+06	0.471519	0.323438	0.68595
1253	0	5448	14946			1.6617e+06	4615953	1.24391e+06	0.359991	0.26948	0.748575
1254	0	5528	14946			1.86572e+06	4.55964e+06	1.57699e+06	0.409183	0.345858	0.845241
1255	0	5608	14946			1.22943e+06	3.72381e+06	1343547	0.330153	0.360799	1.09282
1256	0	5688	14946			2.24576e+06	7.32894e+06	2.4828e+06	0.306424	0.338767	1.10555
1257	0	5768	14946			3.13285e+06	9425118	2688058	0.332394	0.285202	0.858023
1258	0	5848	14946			3.81889e+06	13880441	3.58181e+06	0.275127	0.258047	0.93792
1259	0	5928	14946			4258994	16346505	4.08538e+06	0.260545	0.249924	0.959236
1260	0	6008	14946			3.17753e+06	11184925	3361150	0.284091	0.300507	1.05779
1261	0	6088	14946			3.56065e+06	15367110	4658774	0.231706	0.303165	1.3084
1262	0	6168	14946			3.51858e+06	13883742	4428102	0.253432	0.318942	1.25849
1263	0	6248	14946			3.62628e+06	12713105	3.93898e+06	0.285239	0.309836	1.08623
1264	0	6328	14946			2.02526e+06	6155773	1.80044e+06	0.329001	0.29248	0.888995
1265	0	6408	14946			2.24472e+06	6.17619e+06	2.18303e+06	0.363448	0.35346	0.972517
1266	0	6488	14946			2.27309e+06	6.96889e+06	2.31251e+06	0.326176	0.331833	1.01734
1267	0	6568	14946			3.61374e+06	12084531	4.12896e+06	0.299039	0.341673	1.14257
1268	0	6648	14946			2.2332e+06	8180128	2.78363e+06	0.273003	0.340292	1.24648
1269	0	6728	14946			2681092	7343643	2.39377e+06	0.36509	0.325965	0.892833
1270	0	6808	14946			2.73342e+06	8334639	2.82581e+06	0.327959	0.339044	1.0338
1271	0	6888	14946			2.93074e+06	7999929	2.61676e+06	0.366346	0.327098	0.892868
1272	0	6968	14946			2.66662e+06	7339769	2.20326e+06	0.363312	0.300182	0.826237
1273	0	7048	14946			2.52319e+06	7.25816e+06	2.32413e+06	0.347635	0.320209	0.921107
1274	0	7128	14946			2.98983e+06	8038519	2536363	0.371938	0.315526	0.848329
1275	0	7208	14946			3399748	8651247	2685848	0.392978	0.310458	0.790014
1276	0	7288	14946			2.92677e+06	8446520	2.29085e+06	0.346506	0.271218	0.782724
1277	0	7368	14946			3.38943e+06	8701399	2913840	0.389526	0.33487	0.859686
1278	0	7448	14946			3.65191e+06	9090320	2.39548e+06	0.401737	0.26352	0.655953
1279	0	7528	14946			3.59835e+06	8493131	2.12279e+06	0.423678	0.249941	0.589933
1280	0	7608	14946			3.62019e+06	8.01417e+06	2.5056e+06	0.451724	0.312646	0.692118
1281	0	7688	14946			3240037	8.26585e+06	2.40888e+06	0.391979	0.291426	0.743474
1282	0	7768	14946			3.25186e+06	7195647	2234282	0.451921	0.310505	0.687077
1283	0	7848	14946			4.11144e+06	8.08528e+06	2201719	0.50851	0.272312	0.53551
1284	0	7928	14946			3.28275e+06	8.17633e+06	2132785	0.401495	0.260849	0.649694
1285	0	8008	14946			3.4917e+06	8652670	2.09005e+06	0.40354	0.24155	0.598578
1286	0	8088	14946			2826552	6.569e+06	1.59474e+06	0.430286	0.242768	0.5642
1287	0	8168	14946			3.11415e+06	6732132	1.71505e+06	0.46258	0.254756	0.550729
1288	0	8248	14946			2980056	6.26994e+06	1.53082e+06	0.475293	0.244153	0.513689
1289	0	8328	14946			1.47225e+06	4132217	1.04258e+06	0.356286	0.252306	0.708154
1290	0	8408	14946			1.56003e+06	3.99735e+06	1.01441e+06	0.390267	0.253771	0.650251
1291	0	8488	14946			1358580	3767815	1.05952e+06	0.360575	0.281203	0.779875
1292	0	8568	14946			1.17848e+06	2.70804e+06	749524	0.435177	0.276778	0.636011
1293	0	8648	14946			1.04342e+06	2.11008e+06	518025	0.494494	0.2455	0.496467
1294	0	8728	14946			738066	1850431	530782	0.398861	0.286843	0.719154
1295	0	8808	14946			1.3071e+06	2.91215e+06	881556	0.448842	0.302716	0.674439
1296	0	8888	14946			474926	915902	294822	0.518534	0.321893	0.620775
1297	0	968	14866			3.16963e+06	8144179	2.72035e+06	0.38919	0.334024	0.858255
1298	0	1048	14866			3.90581e+06	9576729	2.90104e+06	0.407844	0.302926	0.742749
1299	0	1128	14866			3.32825e+06	7675852	2.35195e+06	0.433601	0.306409	0.706662
1300	0	1208	14866			2.7596e+06	6889240	2.01878e+06	0.400567	0.293034	0.731548
1301	0	1288	14866			2.67725e+06	6.33271e+06	1.55435e+06	0.422766	0.245448	0.580576
1302	0	1368	14866			2.92523e+06	6.27388e+06	1.87426e+06	0.466256	0.29874	0.640722
1303	0	1448	14866			2.65233e+06	5251943	1.75538e+06	0.505019	0.334234	0.661826
1304	0	1528	14866			1.76604e+06	3.47155e+06	1.01851e+06	0.508718	0.293387	0.57672
1305	0	1608	14866			1.77839e+06	4922444	1212981	0.361281	0.246418	0.682068
1306	0	1688	14866			2.15513e+06	4706565	1.198e+06	0.457899	0.254538	0.555882
1307	0	1768	14866			1.98133e+06	3.95181e+06	1.41941e+06	0.501372	0.359179	0.716392
1308	0	1848	14866			2285094	6426219	1851724	0.355589	0.288151	0.810349
1309	0	1928	14866			2179446	4.78262e+06	1.35292e+06	0.455701	0.282882	0.620763
1310	0	2008	14866			1.71187e+06	4.49729e+06	1.36728e+06	0.380644	0.304022	0.798704
1311	0	2088	14866			1.93673e+06	4284020	1.46962e+06	0.452083	0.343047	0.758813
1312	0	2168	14866			1.53709e+06	4303438	1462532	0.357176	0.339852	0.951496
1313	0	2248	14866			1.33613e+06	3829535	1.42327e+06	0.348902	0.371656	1.06522
1314	0	2328	14866			1.71663e+06	4679897	2.09866e+06	0.36681	0.448441	1.22254
1315	0	2408	14866			1.30957e+06	4.65763e+06	1.86667e+06	0.281166	0.400777	1.42541
1316	0	2488	14866			724726	3102459	1.35172e+06	0.233597	0.435692	1.86514
1317	0	2568	14866			787437	6327759	1.78304e+06	0.124442	0.281781	2.26436
1318	0	2648	14866			590446	5345082	1.48699e+06	0.110465	0.278198	2.51842
1319	0	2728	14866			798627	7128475	1.88399e+06	0.112033	0.26429	2.35903
1320	0	2808	14866			662459	4.78216e+06	1494427	0.138527	0.3125	2.25588
1321	0	2888	14866			694623	3.66511e+06	1.56621e+06	0.189523	0.42733	2.25477
1322	0	2968	14866			1.32941e+06	4837262	2140775	0.274828	0.442559	1.61032
1323	0	3048	14866			1.06847e+06	5.49187e+06	1.94176e+06	0.194555	0.353569	1.81732
1324	0	3128	14866			1.25306e+06	5.78402e+06	2.04956e+06	0.216642	0.354348	1.63564
1325	0	3208	14866			1.34579e+06	5354162	1924929	0.251354	0.35952	1.43033
1326	0	3288	14866			1.56777e+06	5609428	2.15773e+06	0.279488	0.384661	1.3763
1327	0	3368	14866			1.34217e+06	4707865	1.78693e+06	0.285091	0.379563	1.33138
1328	0	3448	14866			1.88101e+06	7384448	2.41196e+06	0.254727	0.326627	1.28227
1329	0	3528	14866			1.44199e+06	6320615	2.0155e+06	0.228141	0.318878	1.39772
1330	0	3608	14866			792329	4.24856e+06	1.4574e+06	0.186494	0.343035	1.83939
1331	0	3688	14866			375804	3.02922e+06	758467	0.12406	0.250383	2.01825
1332	0	3768	14866			280880	2144604	625154	0.130971	0.291501	2.2257
1333	0	3848	14866			953107	4.84587e+06	1.34437e+06	0.196684	0.277426	1.41051
1334	0	3928	14866			1.10952e+06	5396198	1.8344e+06	0.205612	0.339943	1.65332
1335	0	4008	14866			1.21571e+06	5.83775e+06	1.93107e+06	0.20825	0.33079	1.58843
1336	0	4088	14866			1.50541e+06	6.33722e+06	1.88108e+06	0.237551	0.29683	1.24954
1337	0	4168	14866			1746869	6653984	1.98911e+06	0.26253	0.298936	1.13867
1338	0	4248	14866			1.97292e+06	6435896	2.30905e+06	0.306549	0.358777	1.17037
1339	0	4328	14866			2.1344e+06	7196277	2.56356e+06	0.296598	0.356234	1.20107
1340	0	4408	14866			1.68204e+06	6438478	1.99195e+06	0.261248	0.309383	1.18425
1341	0	4488	14866			2038897	6.18645e+06	1.76926e+06	0.329575	0.28599	0.867754
1342	0	4568	14866			1.57251e+06	5139098	1.78722e+06	0.30599	0.347768	1.13653
1343	0	4648	14866			1.70288e+06	5601178	1.90237e+06	0.304021	0.339637	1.11715
1344	0	4728	14866			1.91023e+06	5340103	1.74885e+06	0.357714	0.327493	0.915516
1345	0	4808	14866			2.19038e+06	6405023	2.17997e+06	0.341978	0.340353	0.995248
1346	0	4888	14866			2221715	6.47503e+06	2037892	0.34312	0.314731	0.917261
1347	0	4968	14866			2.21884e+06	6047831	2.14425e+06	0.366882	0.354549	0.966383
1348	0	5048	14866			1.8213e+06	5.1791e+06	1.90189e+06	0.351663	0.367225	1.04425
1349	0	5128	14866			2.55213e+06	6606041	2394048	0.386333	0.362403	0.938058
1350	0	5208	14866			2.12829e+06	5580408	2.07679e+06	0.381385	0.372158	0.975805
1351	0	5288	14866			1.41633e+06	3.41586e+06	1053579	0.414633	0.308437	0.743881
1352	0	5368	14866			1.10301e+06	4472238	1.3234e+06	0.246634	0.295914	1.19981
1353	0	5448	14866			1.79814e+06	4.22547e+06	1.52209e+06	0.425549	0.360219	0.846481
1354	0	5528	14866			1.51762e+06	4534606	1.42858e+06	0.334676	0.31504	0.941328
1355	0	5608	14866			1.49537e+06	4.77318e+06	1.60213e+06	0.313287	0.335652	1.07139
1356	0	5688	14866			1.80209e+06	5.82203e+06	2.06202e+06	0.309529	0.354175	1.14424
1357	0	5768	14866			1.77551e+06	6.32207e+06	2.49578e+06	0.280843	0.394772	1.40567
1358	0	5848	14866			1.99936e+06	7302404	2.31766e+06	0.273795	0.317383	1.1592
1359	0	5928	14866			4.1464e+06	15824572	3819692	0.262023	0.241377	0.921207
1360	0	6008	14866			3.48349e+06	15335693	4025919	0.227149	0.26252	1.15571
1361	0	6088	14866			3.17494e+06	11755537	3104648	0.27008	0.264101	0.977861
1362	0	6168	14866			2.75133e+06	12362398	3.61472e+06	0.222556	0.292397	1.31381
1363	0	6248	14866			3440193	14655966	4390510	0.23473	0.299572	1.27624
1364	0	6328	14866			4.03451e+06	14981664	4217633	0.269296	0.28152	1.04539
1365	0	6408	14866			3338395	12135191	3.4331e+06	0.2751	0.282904	1.02837
1366	0	6488	14866			2.05768e+06	5.20447e+06	1.91011e+06	0.395368	0.367013	0.928283
1367	0	6568	14866			2.17275e+06	7.85467e+06	2630560	0.276619	0.334904	1.21071
1368	0	6648	14866			2569279	9042649	3.64521e+06	0.284129	0.403113	1.41877
1369	0	6728	14866			3.64041e+06	12007481	4.52122e+06	0.303178	0.376534	1.24195
1370	0	6808	14866			2.91369e+06	8884798	2995831	0.327941	0.337186	1.02819
1371	0	6888	14866			2320089	6851962	2295951	0.338602	0.335079	0.989596
1372	0	6968	14866			2.2918e+06	7618938	2561598	0.300803	0.336215	1.11772
1373	0	7048	14866			2.65446e+06	8713558	3.29022e+06	0.304636	0.377597	1.2395
1374	0	7128	14866			3.1465e+06	9577201	3.25297e+06	0.32854	0.339658	1.03384
1375	0	7208	14866			2.88482e+06	8.24148e+06	2.55525e+06	0.350036	0.310047	0.885756
1376	0	7288	14866			1.90103e+06	5.7675e+06	1.58458e+06	0.329611	0.274744	0.833539
1377	0	7368	14866			3.30473e+06	9040103	2.30544e+06	0.365563	0.255024	0.697619
1378	0	7448	14866			3106470	7.63488e+06	2119111	0.406879	0.277557	0.68216
1379	0	7528	14866			3.19212e+06	7.42095e+06	2.21493e+06	0.43015	0.29847	0.693874
1380	0	7608	14866			3367300	9019032	2.36095e+06	0.373355	0.261774	0.701139
1381	0	7688	14866			3494384	8252968	2491721	0.423409	0.301918	0.713064
1382	0	7768	14866			3.38837e+06	8162300	2.04101e+06	0.415125	0.250053	0.602357
1383	0	7848	14866			3.7037e+06	8.04102e+06	2.3245e+06	0.4606	0.28908	0.627617
1384	0	7928	14866			3328141	7.17336e+06	1.75933e+06	0.463959	0.245258	0.528621
1385	0	8008	14866			3537716	9660879	2.40483e+06	0.36619	0.248925	0.67977
1386	0	8088	14866			3078269	6.67178e+06	1.79883e+06	0.461386	0.269617	0.584363
1387	0	8168	14866			3.23196e+06	7204123	1.79677e+06	0.448626	0.249408	0.555937
1388	0	8248	14866			2.69062e+06	6.08653e+06	1.7593e+06	0.442061	0.289049	0.653867
1389	0	8328	14866			2.28439e+06	5.42989e+06	1.63567e+06	0.420706	0.301234	0.716019
1390	0	8408	14866			1.36111e+06	3.99278e+06	1327698	0.340892	0.332524	0.975455
1391	0	8488	14866			1.80698e+06	4.00419e+06	1.15458e+06	0.451273	0.288342	0.638953
1392	0	8568	14866			2.01555e+06	4490018	1.19611e+06	0.448896	0.266394	0.593442
1393	0	8648	14866			1.7734e+06	4.14616e+06	1.13489e+06	0.427721	0.273721	0.639953
1394	0	8728	14866			1.47703e+06	3.35004e+06	907234	0.440901	0.270813	0.614227
1395	0	8808	14866			819350	2.07325e+06	516641	0.395201	0.249194	0.63055
1396	0	8888	14866			1.536e+06	3453214	912625	0.444802	0.264283	0.594158
1397	0	8968	14866			137802	356183	125728	0.386884	0.352989	0.912388
1398	0	9048	14866			339764	703272	177449	0.483119	0.252319	0.522272
1399	0	888	14786			1.26895e+06	3.35551e+06	1.25543e+06	0.37817	0.374139	0.989342
1400	0	968	14786			3666886	8640099	2.63139e+06	0.424403	0.304555	0.717609
1401	0	1048	14786			3.70674e+06	8713318	2.49091e+06	0.42541	0.285873	0.671994
1402	0	1128	14786			3.7292e+06	7865644	2476147	0.474113	0.314805	0.663988
1403	0	1208	14786			3.7763e+06	7966276	2.20875e+06	0.474036	0.277262	0.584897
1404	0	1288	14786			2.70775e+06	6023728	1.70074e+06	0.449514	0.282341	0.628102
1405	0	1368	14786			2.39659e+06	4.69242e+06	1.51174e+06	0.510737	0.322167	0.630788
1406	0	1448	14786			1.91558e+06	4.63388e+06	1.43859e+06	0.413387	0.310451	0.750995
1407	0	1528	14786			1801372	3.81565e+06	1.05747e+06	0.472102	0.27714	0.587036
1408	0	1608	14786			1.79636e+06	4253226	920060	0.422353	0.216321	0.512179
1409	0	1688	14786			1.55602e+06	3.8056e+06	1.45597e+06	0.408878	0.382588	0.935702
1410	0	1768	14786			1404183	4384355	1.36499e+06	0.320271	0.311333	0.972092
1411	0	1848	14786			2.05068e+06	4198237	1.38595e+06	0.488463	0.330127	0.675849
1412	0	1928	14786			1.44007e+06	4.11287e+06	1.31901e+06	0.350137	0.320703	0.915935
1413	0	2008	14786			451214	1705417	566579	0.264577	0.332223	1.25568
1414	0	2088	14786			268773	1.04764e+06	375039	0.25655	0.357984	1.39538
1415	0	2168	14786			1276481	3353060	1.16839e+06	0.380691	0.348455	0.915322
1416	0	2248	14786			969271	3.80314e+06	1310903	0.254861	0.34469	1.35246
1417	0	2328	14786			1.49162e+06	5.10753e+06	2.40976e+06	0.292043	0.471806	1.61554
1418	0	2408	14786			516477	3129460	1.20034e+06	0.165037	0.38356	2.32408
1419	0	2488	14786			525495	3583897	1.12288e+06	0.146627	0.313312	2.1368
1420	0	2568	14786			825220	6.13974e+06	1.88533e+06	0.134406	0.30707	2.28464
1421	0	2648	14786			883525	8566947	2.1327e+06	0.103132	0.248946	2.41386
1422	0	2728	14786			729505	6.53736e+06	1.77749e+06	0.11159	0.271897	2.43657
1423	0	2808	14786			303750	2.82465e+06	926430	0.107535	0.32798	3.04998
1424	0	2888	14786			632912	3.61188e+06	1.30478e+06	0.175231	0.361247	2.06155
1425	0	2968	14786			1.1917e+06	6.79618e+06	2.42923e+06	0.175349	0.357441	2.03846
1426	0	3048	14786			1.57122e+06	8.09812e+06	3.05538e+06	0.194023	0.377295	1.94459
1427	0	3128	14786			1.69891e+06	7759972	3.00366e+06	0.218933	0.387071	1.76799
1428	0	3208	14786			1767068	8986150	3.4304e+06	0.196644	0.381743	1.94129
1429	0	3288	14786			1.39371e+06	7414134	2.82454e+06	0.187981	0.380967	2.02663
1430	0	3368	14786			1.46024e+06	6156345	2042779	0.237192	0.331817	1.39894
1431	0	3448	14786			1.49178e+06	7.28515e+06	2.40922e+06	0.20477	0.330703	1.615
1432	0	3528	14786			1.25195e+06	6.20081e+06	2.19148e+06	0.201901	0.353419	1.75046
1433	0	3608	14786			978421	5946507	2126444	0.164537	0.357595	2.17334
1434	0	3688	14786			1.01672e+06	5969075	1.82309e+06	0.170332	0.305423	1.79311
1435	0	3768	14786			894015	5.09629e+06	1.5267e+06	0.175425	0.299571	1.70769
1436	0	3848	14786			1.38431e+06	5.81368e+06	1.69508e+06	0.238112	0.291567	1.22449
1437	0	3928	14786			1.91325e+06	7267948	2320199	0.263244	0.319237	1.2127
1438	0	4008	14786			2.33121e+06	7.61375e+06	2.29694e+06	0.306184	0.301684	0.985301
1439	0	4088	14786			1.97571e+06	6.81387e+06	2.12601e+06	0.289954	0.312011	1.07607
1440	0	4168	14786			2195910	7.68548e+06	2.37778e+06	0.285722	0.309386	1.08282
1441	0	4248	14786			1.97651e+06	6646993	1.95581e+06	0.297353	0.29424	0.98953
1442	0	4328	14786			2.31774e+06	6.85755e+06	2107752	0.337984	0.307362	0.909398
1443	0	4408	14786			2170928	7.74569e+06	2309804	0.280276	0.298205	1.06397
1444	0	4488	14786			2.40561e+06	7379099	2486170	0.326004	0.336921	1.03349
1445	0	4568	14786			2.31941e+06	6616097	2339692	0.350571	0.353636	1.00874
1446	0	4648	14786			2402927	8362277	2.56213e+06	0.287353	0.306391	1.06625
1447	0	4728	14786			2105119	6899532	2.15369e+06	0.30511	0.31215	1.02307
1448	0	4808	14786			2.28785e+06	7.39838e+06	2156804	0.309236	0.291524	0.942722
1449	0	4888	14786			2.84458e+06	8.03583e+06	2494374	0.353988	0.310407	0.876886
1450	0	4968	14786			2.72446e+06	7.47203e+06	2.27668e+06	0.36462	0.304694	0.835648
1451	0	5048	14786			1.94291e+06	6350005	2.0802e+06	0.30597	0.32759	1.07066
1452	0	5128	14786			2759099	7.46068e+06	2.59055e+06	0.369819	0.347228	0.938913
1453	0	5208	14786			2.28094e+06	6830217	2.19007e+06	0.333949	0.320644	0.96016
1454	0	5288	14786			1.85957e+06	4.90537e+06	1.60091e+06	0.379088	0.326359	0.860907
1455	0	5368	14786			1.5072e+06	4.20117e+06	1.50126e+06	0.358757	0.357342	0.996056
1456	0	5448	14786			1.6284e+06	5.59469e+06	1.73077e+06	0.291062	0.30936	1.06287
1457	0	5528	14786			2.07463e+06	5812256	2.00678e+06	0.356941	0.345267	0.967294
1458	0	5608	14786			1.945e+06	5670968	1.82873e+06	0.342975	0.322472	0.940221
1459	0	5688	14786			2.10924e+06	6027759	2.20937e+06	0.349922	0.366532	1.04747
1460	0	5768	14786			2.14898e+06	6.38104e+06	2.06963e+06	0.336776	0.324341	0.963076
1461	0	5848	14786			1.8311e+06	6.27805e+06	2555042	0.291668	0.40698	1.39536
1462	0	5928	14786			2.39203e+06	8.12326e+06	3.15557e+06	0.294467	0.388462	1.3192
1463	0	6008	14786			3.73116e+06	13892312	3.92275e+06	0.268577	0.282368	1.05135
1464	0	6088	14786			4947680	18233210	4.65578e+06	0.271355	0.255346	0.941002
1465	0	6168	14786			3.10641e+06	12402612	3.29882e+06	0.250464	0.265978	1.06194
1466	0	6248	14786			2.53808e+06	9935004	2.3592e+06	0.255469	0.237463	0.929519
1467	0	6328	14786			2.99489e+06	9431362	3.41681e+06	0.317546	0.362281	1.14088
1468	0	6408	14786			4.37656e+06	16327821	4330217	0.268043	0.265205	0.989411
1469	0	6488	14786			4727508	17467848	4.61288e+06	0.270641	0.264078	0.975754
1470	0	6568	14786			3.47334e+06	9971661	3139410	0.348321	0.314833	0.903859
1471	0	6648	14786			2.27227e+06	7.23672e+06	2.52349e+06	0.313992	0.348706	1.11056
1472	0	6728	14786			2.79035e+06	8782756	3.26215e+06	0.317707	0.371427	1.16909
1473	0	6808	14786			2.99944e+06	8825537	2992697	0.339859	0.339095	0.997752
1474	0	6888	14786			2.70661e+06	7.9994e+06	2.83543e+06	0.338352	0.354455	1.04759
1475	0	6968	14786			3.13008e+06	8462565	3448771	0.369873	0.407533	1.10182
1476	0	7048	14786			2.57525e+06	7044266	3.02518e+06	0.365581	0.429453	1.17471
1477	0	7128	14786			2.89466e+06	8241918	2.97313e+06	0.351212	0.360733	1.02711
1478	0	7208	14786			2.56599e+06	7.26114e+06	2.50895e+06	0.353387	0.345531	0.977768
1479	0	7288	14786			3.15614e+06	8507392	2.4643e+06	0.370988	0.289666	0.780796
1480	0	7368	14786			3.16729e+06	8868522	2424808	0.357138	0.273417	0.765579
1481	0	7448	14786			3.08638e+06	7817722	2.66379e+06	0.394793	0.340737	0.863078
1482	0	7528	14786			2.88281e+06	7133586	2.04707e+06	0.404118	0.286963	0.710096
1483	0	7608	14786			3.21717e+06	7.62321e+06	2.33173e+06	0.422024	0.305873	0.724776
1484	0	7688	14786			2.97609e+06	7339278	2272885	0.405502	0.309688	0.763715
1485	0	7768	14786			3379305	7555316	2.32957e+06	0.447275	0.308335	0.689364
1486	0	7848	14786			3.19838e+06	7.8487e+06	1.95598e+06	0.407505	0.249211	0.611554
1487	0	7928	14786			3.84163e+06	8.15771e+06	2103741	0.47092	0.257884	0.547617
1488	0	8008	14786			3.81569e+06	9334362	2.22046e+06	0.408779	0.23788	0.581928
1489	0	8088	14786			4385024	9227633	2.43373e+06	0.475206	0.263744	0.55501
1490	0	8168	14786			3.72057e+06	8.08162e+06	2.12058e+06	0.460374	0.262396	0.569962
1491	0	8248	14786			3114430	6.4031e+06	1.65117e+06	0.486394	0.25787	0.530167
1492	0	8328	14786			1.93404e+06	4937744	1.53108e+06	0.391685	0.310077	0.791647
1493	0	8408	14786			2.55553e+06	5975349	1.47737e+06	0.427679	0.247244	0.578105
1494	0	8488	14786			2.43252e+06	5.91257e+06	1.47833e+06	0.411416	0.250032	0.607736
1495	0	8568	14786			2.50701e+06	5.30965e+06	1.59793e+06	0.47216	0.300948	0.637385
1496	0	8648	14786			1.97281e+06	4.81297e+06	1.21682e+06	0.409894	0.252822	0.616797
1497	0	8728	14786			1.85819e+06	4.19158e+06	936538	0.443315	0.223433	0.504006
1498	0	8808	14786			1.2223e+06	2.80645e+06	721204	0.435532	0.256981	0.59004
1499	0	8888	14786			1.05189e+06	2676452	559852	0.393018	0.209177	0.532233
1500	0	8968	14786			920581	2.46922e+06	570834	0.372822	0.23118	0.620081
1501	0	9048	14786			338241	899918	270607	0.375858	0.300701	0.80004
1502	0	9128	14786			56284.4	124538	50128.6	0.451946	0.402517	0.890631
1503	0	808	14706			791087	3.00296e+06	702130	0.263435	0.233812	0.887551
1504	0	888	14706			536372	1.74279e+06	462276	0.307766	0.26525	0.861857
1505	0	968	14706			340966	1.08322e+06	340216	0.314772	0.314079	0.997799
1506	0	1048	14706			2.13152e+06	6532225	1.77879e+06	0.326308	0.27231	0.834517
1507	0	1128	14706			3.69316e+06	8661640	2.30795e+06	0.426382	0.266456	0.624924
1508	0	1208	14706			3024238	7957967	2158392	0.380026	0.271224	0.713698
1509	0	1288	14706			3.38892e+06	7067898	1.88332e+06	0.47948	0.266461	0.555728
1510	0	1368	14706			1.97671e+06	5038430	1.79941e+06	0.392327	0.357137	0.910304
1511	0	1448	14706			1.50685e+06	3778073	1.01255e+06	0.39884	0.268006	0.671964
1512	0	1528	14706			1.68245e+06	4324320	1.28982e+06	0.389068	0.29827	0.766628
1513	0	1608	14706			1.92642e+06	5.28058e+06	1.89968e+06	0.364813	0.359748	0.986116
1514	0	1688	14706			1.81444e+06	4.19589e+06	1.27074e+06	0.432433	0.302854	0.700349
1515	0	1768	14706			2134574	4.92068e+06	1.373e+06	0.433797	0.279026	0.643218
1516	0	1848	14706			2.01665e+06	4993191	1.76472e+06	0.403881	0.353425	0.875073
1517	0	1928	14706			1.69848e+06	3634932	1.26915e+06	0.467265	0.349153	0.747226
1518	0	2008	14706			118535	582798	185170	0.20339	0.317726	1.56215
1519	0	2088	14706			30229.3	181333	52377.1	0.166706	0.288844	1.73266
1520	0	2168	14706			1.00428e+06	3.79709e+06	1.80622e+06	0.264486	0.475686	1.79853
1521	0	2248	14706			1.57914e+06	6.26868e+06	2.35391e+06	0.25191	0.375503	1.49063
1522	0	2328	14706			875765	3648583	1.48681e+06	0.240029	0.407505	1.69773
1523	0	2408	14706			1.45773e+06	11184137	3.36017e+06	0.130339	0.30044	2.30507
1524	0	2488	14706			1.12046e+06	9353056	2453589	0.119796	0.26233	2.18981
1525	0	2568	14706			599000	6566038	1.7441e+06	0.091227	0.265624	2.91168
1526	0	2648	14706			881915	9009126	2574861	0.0978913	0.285806	2.91962
1527	0	2728	14706			332705	3.66573e+06	1.0847e+06	0.0907609	0.295903	3.26025
1528	0	2808	14706			6826.54	91575	25257.5	0.0745459	0.275813	3.6999
1529	0	2888	14706			620116	3.50328e+06	1.20433e+06	0.17701	0.343773	1.94211
1530	0	2968	14706			1.28361e+06	6675107	2.6425e+06	0.192298	0.395874	2.05865
1531	0	3048	14706			1499084	8113249	3.12926e+06	0.18477	0.385697	2.08745
1532	0	3128	14706			1.36752e+06	8367636	2748259	0.163429	0.328439	2.00967
1533	0	3208	14706			1.68276e+06	10704755	3.60005e+06	0.157197	0.336303	2.13937
1534	0	3288	14706			2.0354e+06	11018548	3.63402e+06	0.184725	0.329809	1.78541
1535	0	3368	14706			1.80977e+06	8697509	3.0265e+06	0.208079	0.347974	1.67232
1536	0	3448	14706			1.32217e+06	9024657	2449311	0.146506	0.271402	1.85249
1537	0	3528	14706			1.09265e+06	6.99273e+06	2168000	0.156255	0.310036	1.98417
1538	0	3608	14706			869691	5482922	1.76815e+06	0.158618	0.322482	2.03307
1539	0	3688	14706			1.01801e+06	6035416	1.84436e+06	0.168672	0.30559	1.81174
1540	0	3768	14706			1.46941e+06	6651735	2141064	0.220907	0.321881	1.45709
1541	0	3848	14706			1.53862e+06	6.09507e+06	1.94213e+06	0.252437	0.318639	1.26225
1542	0	3928	14706			2.13382e+06	6285018	2.23593e+06	0.339509	0.355756	1.04785
1543	0	4008	14706			2.13536e+06	7.29577e+06	2.06041e+06	0.292685	0.282412	0.964901
1544	0	4088	14706			2302493	8032797	2.54222e+06	0.286637	0.31648	1.10412
1545	0	4168	14706			2.43398e+06	7.90751e+06	2.79086e+06	0.307807	0.352938	1.14662
1546	0	4248	14706			1.9685e+06	6.82028e+06	2.32153e+06	0.288625	0.340386	1.17934
1547	0	4328	14706			2.35115e+06	7278560	2348223	0.323024	0.322622	0.998756
1548	0	4408	14706			2571997	7552994	2371343	0.340527	0.313961	0.921985
1549	0	4488	14706			2.31233e+06	7.07335e+06	2.25725e+06	0.326907	0.31912	0.976179
1550	0	4568	14706			2.36814e+06	7.73994e+06	2433245	0.305964	0.314375	1.02749
1551	0	4648	14706			2.75181e+06	8609447	2.70608e+06	0.319627	0.314315	0.983381
1552	0	4728	14706			2938925	8.29468e+06	2.75691e+06	0.354315	0.332371	0.938067
1553	0	4808	14706			2.85552e+06	7.84318e+06	2615628	0.364077	0.333491	0.915989
1554	0	4888	14706			3022597	9328534	3.04724e+06	0.324016	0.326658	1.00815
1555	0	4968	14706			2722195	7565269	2.41216e+06	0.359828	0.318846	0.886108
1556	0	5048	14706			3.09421e+06	8971026	2896851	0.344911	0.322912	0.936218
1557	0	5128	14706			2.84963e+06	8483980	2.92127e+06	0.335884	0.344328	1.02514
1558	0	5208	14706			2.58624e+06	7.01919e+06	2.17044e+06	0.368452	0.309215	0.839227
1559	0	5288	14706			2.34197e+06	5716361	1.61735e+06	0.409695	0.282933	0.690593
1560	0	5368	14706			2.1047e+06	5.16359e+06	1.57288e+06	0.407604	0.304609	0.747317
1561	0	5448	14706			3.01255e+06	7122971	2.59837e+06	0.422934	0.364788	0.862518
1562	0	5528	14706			2.40762e+06	6862237	2.58349e+06	0.350851	0.376479	1.07304
1563	0	5608	14706			1895597	6168851	2.41514e+06	0.307285	0.391506	1.27408
1564	0	5688	14706			2.059e+06	6.89852e+06	2.58024e+06	0.29847	0.374028	1.25315
1565	0	5768	14706			2.0266e+06	6212332	2.24258e+06	0.326221	0.360988	1.10657
1566	0	5848	14706			2.10785e+06	7.00273e+06	2.31058e+06	0.301005	0.329955	1.09618
1567	0	5928	14706			2.41103e+06	7.34672e+06	2.76683e+06	0.328178	0.376607	1.14757
1568	0	6008	14706			1.78464e+06	6.90471e+06	2.57295e+06	0.258467	0.372637	1.44172
1569	0	6088	14706			3.11621e+06	9287117	3.19194e+06	0.335541	0.343695	1.0243
1570	0	6168	14706			3.65357e+06	11607106	3.90291e+06	0.31477	0.336252	1.06824
1571	0	6248	14706			4.4159e+06	15075284	4192193	0.292923	0.278084	0.949341
1572	0	6328	14706			3.46319e+06	13099931	3.6994e+06	0.264367	0.282399	1.06821
1573	0	6408	14706			4610057	17844126	4.87441e+06	0.258352	0.273166	1.05734
1574	0	6488	14706			3.37305e+06	10784524	3.1868e+06	0.312768	0.295497	0.944783
1575	0	6568	14706			2.81169e+06	7507359	2607373	0.374524	0.347309	0.927333
1576	0	6648	14706			2.34582e+06	7344469	2.48826e+06	0.3194	0.338794	1.06072
1577	0	6728	14706			2044836	6625065	2.32805e+06	0.308651	0.3514	1.1385
1578	0	6808	14706			2198088	6.94035e+06	2499760	0.316712	0.360178	1.13724
1579	0	6888	14706			2.42982e+06	7513329	3.01541e+06	0.323402	0.401341	1.241
1580	0	6968	14706			2612681	7317863	2.48138e+06	0.357028	0.339086	0.949746
1581	0	7048	14706			2.46833e+06	7.64484e+06	2.9799e+06	0.322875	0.389792	1.20725
1582	0	7128	14706			2815166	8189877	3.07655e+06	0.343737	0.375653	1.09285
1583	0	7208	14706			2.16798e+06	7139614	2.56704e+06	0.303656	0.359549	1.18407
1584	0	7288	14706			2.5003e+06	6.66049e+06	2357293	0.375393	0.353922	0.942804
1585	0	7368	14706			3.35947e+06	9545401	3.23089e+06	0.351946	0.338476	0.961726
1586	0	7448	14706			3.15771e+06	8497345	2539533	0.371611	0.298862	0.804232
1587	0	7528	14706			3.61783e+06	10019884	2.81234e+06	0.361065	0.280676	0.777355
1588	0	7608	14706			3.38539e+06	7.9697e+06	2.1417e+06	0.424782	0.26873	0.632631
1589	0	7688	14706			2.9446e+06	6653177	2.24612e+06	0.442585	0.337601	0.762794
1590	0	7768	14706			3.78221e+06	8421724	2.19975e+06	0.449101	0.261199	0.581604
1591	0	7848	14706			3.65563e+06	8.25964e+06	2.33209e+06	0.44259	0.282347	0.637943
1592	0	7928	14706			3.98253e+06	8066698	2.47155e+06	0.493701	0.306389	0.620598
1593	0	8008	14706			3.35048e+06	7441256	1.91919e+06	0.450258	0.257912	0.57281
1594	0	8088	14706			3109316	6761704	1.82731e+06	0.459842	0.270245	0.58769
1595	0	8168	14706			3716182	7904712	2.31078e+06	0.470122	0.29233	0.621816
1596	0	8248	14706			3.41373e+06	7.52106e+06	1.8774e+06	0.45389	0.249618	0.549954
1597	0	8328	14706			3568501	7744228	2.09378e+06	0.460795	0.270366	0.586739
1598	0	8408	14706			3.2269e+06	6.51738e+06	1.75551e+06	0.495123	0.269358	0.544022
1599	0	8488	14706			3.31303e+06	6591434	1.87084e+06	0.502627	0.28383	0.564692
1600	0	8568	14706			2.74189e+06	5815408	1583130	0.471488	0.27223	0.577386
1601	0	8648	14706			2.65082e+06	5721694	1.6483e+06	0.463293	0.28808	0.621809
1602	0	8728	14706			1.92101e+06	4.32291e+06	1.33167e+06	0.444379	0.30805	0.693215
1603	0	8808	14706			1.48269e+06	3.53861e+06	968987	0.419004	0.273833	0.653532
1604	0	8888	14706			979994	2.36638e+06	606491	0.414132	0.256295	0.618872
1605	0	8968	14706			1.05372e+06	2.65097e+06	728086	0.397483	0.274649	0.69097
1606	0	9048	14706			536929	1.36572e+06	409286	0.393147	0.299685	0.762273
1607	0	9128	14706			349651	763474	197218	0.457973	0.258317	0.564044
1608	0	728	14626			1365.31	1.10558e+06	336282	0.00123493	0.304169	246.305
1609	0	808	14626			1.77191e+06	3.5917e+06	1.0339e+06	0.493334	0.287858	0.583494
1610	0	888	14626			714747	2330172	512986	0.306736	0.220149	0.717716
1611	0	968	14626			18575.6	86363.5	24174.6	0.215086	0.279917	1.30142
1612	0	1048	14626			147994	899173	245623	0.16459	0.273165	1.65968
1613	0	1128	14626			348752	1.35195e+06	392300	0.257962	0.290173	1.12487
1614	0	1208	14626			1.39539e+06	4481266	1.45739e+06	0.311383	0.325218	1.04443
1615	0	1288	14626			2.22325e+06	5539407	1.67938e+06	0.401352	0.30317	0.755371
1616	0	1368	14626			1.22929e+06	3.03077e+06	969068	0.405602	0.319743	0.788316
1617	0	1448	14626			1867036	4.32057e+06	1.24741e+06	0.432127	0.288714	0.668122
1618	0	1528	14626			2.02156e+06	4.39701e+06	1.50919e+06	0.459758	0.343231	0.746546
1619	0	1608	14626			1987401	4544007	1.43088e+06	0.437368	0.314894	0.719975
1620	0	1688	14626			1.72589e+06	3.43998e+06	974005	0.501715	0.283143	0.564351
1621	0	1768	14626			1.25719e+06	3.60795e+06	1.09738e+06	0.34845	0.304157	0.872887
1622	0	1848	14626			1.33935e+06	4.43042e+06	1.35588e+06	0.302308	0.30604	1.01235
1623	0	1928	14626			1.39154e+06	4.43302e+06	1.52399e+06	0.313902	0.34378	1.09518
1624	0	2008	14626			773636	3.17298e+06	1182461	0.24382	0.372665	1.52845
1625	0	2088	14626			689701	3.24826e+06	1.34258e+06	0.21233	0.413324	1.94662
1626	0	2168	14626			1.18085e+06	4346883	1.78912e+06	0.271654	0.411587	1.51511
1627	0	2248	14626			1.21594e+06	4252530	1.51559e+06	0.285933	0.356398	1.24644
1628	0	2328	14626			1.1675e+06	7333260	2302565	0.159207	0.313989	1.97221
1629	0	2408	14626			861354	8.00762e+06	2.24249e+06	0.107567	0.280045	2.60345
1630	0	2488	14626			1.23198e+06	9426064	2745771	0.1307	0.291296	2.22874
1631	0	2568	14626			937130	8415082	2.35616e+06	0.111363	0.279993	2.51423
1632	0	2648	14626			930460	9252646	2.64337e+06	0.100562	0.285688	2.84093
1633	0	2728	14626			357918	2.63095e+06	995781	0.136041	0.378487	2.78215
1634	0	2808	14626			442255	3.22045e+06	1.0501e+06	0.137327	0.326072	2.37442
1635	0	2888	14626			921224	6.2256e+06	2372227	0.147973	0.381044	2.57508
1636	0	2968	14626			872457	4369827	1.78978e+06	0.199655	0.409577	2.05143
1637	0	3048	14626			1.04089e+06	5.85042e+06	2.38653e+06	0.177917	0.407923	2.29277
1638	0	3128	14626			1.53702e+06	7.68799e+06	2.82452e+06	0.199925	0.367394	1.83766
1639	0	3208	14626			2.23324e+06	12478075	3.95149e+06	0.178973	0.316674	1.7694
1640	0	3288	14626			2.12629e+06	10620337	3.38976e+06	0.200209	0.319176	1.59422
1641	0	3368	14626			2410308	15154898	4537493	0.159045	0.299408	1.88254
1642	0	3448	14626			1.83676e+06	11681099	3.5654e+06	0.157242	0.305228	1.94114
1643	0	3528	14626			2.06175e+06	10562210	3.41376e+06	0.195201	0.323205	1.65575
1644	0	3608	14626			1.69891e+06	9408046	3.09007e+06	0.180581	0.328449	1.81885
1645	0	3688	14626			1.5543e+06	6800821	2.01464e+06	0.228546	0.296235	1.29618
1646	0	3768	14626			1.96726e+06	7.35268e+06	1910843	0.267558	0.259884	0.97132
1647	0	3848	14626			1.76443e+06	6.40683e+06	1.81158e+06	0.275399	0.282758	1.02672
1648	0	3928	14626			1.46869e+06	5.46299e+06	1.67485e+06	0.268844	0.306582	1.14037
1649	0	4008	14626			1.6731e+06	5.64283e+06	1.83151e+06	0.2965	0.324573	1.09468
1650	0	4088	14626			1.73299e+06	5820802	1.68289e+06	0.297723	0.289116	0.971092
1651	0	4168	14626			2344717	6.83273e+06	2.12541e+06	0.34316	0.311063	0.906466
1652	0	4248	14626			2.24658e+06	8.04806e+06	2662908	0.279146	0.330876	1.18531
1653	0	4328	14626			2.64671e+06	7341022	2409994	0.360536	0.328291	0.910564
1654	0	4408	14626			2.67859e+06	8532609	2.70297e+06	0.313924	0.316782	1.0091
1655	0	4488	14626			2.81395e+06	8443478	2.82839e+06	0.333269	0.33498	1.00513
1656	0	4568	14626			3210012	9238944	2931223	0.347444	0.317268	0.91315
1657	0	4648	14626			2.97408e+06	9164205	3104127	0.324532	0.338723	1.04373
1658	0	4728	14626			3.1905e+06	10040378	3.54742e+06	0.317767	0.353316	1.11187
1659	0	4808	14626			3596912	9948401	3.26954e+06	0.361557	0.32865	0.908986
1660	0	4888	14626			3.0547e+06	8712733	2.91809e+06	0.350602	0.334923	0.95528
1661	0	4968	14626			3.14522e+06	9160575	2.95121e+06	0.343344	0.322164	0.938313
1662	0	5048	14626			3.40828e+06	9780707	3.38956e+06	0.348469	0.346555	0.994508
1663	0	5128	14626			2.99623e+06	8697660	2.87558e+06	0.344486	0.330615	0.959734
1664	0	5208	14626			2.81099e+06	8050735	2.55783e+06	0.349159	0.317714	0.909939
1665	0	5288	14626			2.49345e+06	6795163	2183253	0.366945	0.321295	0.875595
1666	0	5368	14626			2.24511e+06	5886318	2229628	0.381412	0.378781	0.993103
1667	0	5448	14626			2.35682e+06	7996118	2.68473e+06	0.294745	0.335754	1.13913
1668	0	5528	14626			2.14386e+06	6.0544e+06	2154081	0.3541	0.355788	1.00477
1669	0	5608	14626			2.03568e+06	6.14101e+06	2472696	0.331489	0.402653	1.21468
1670	0	5688	14626			2.32583e+06	8.25502e+06	3070329	0.281748	0.371935	1.3201
1671	0	5768	14626			2.00711e+06	7.41829e+06	2.74998e+06	0.270562	0.370703	1.37012
1672	0	5848	14626			1.96546e+06	6.92923e+06	2466981	0.283648	0.356025	1.25517
1673	0	5928	14626			1969105	6.19346e+06	2386280	0.317933	0.38529	1.21186
1674	0	6008	14626			2.34567e+06	7.56229e+06	2.8262e+06	0.310179	0.373723	1.20486
1675	0	6088	14626			2.51369e+06	7754773	2.48874e+06	0.324147	0.32093	0.990074
1676	0	6168	14626			3.94402e+06	14689367	4466641	0.268495	0.304073	1.13251
1677	0	6248	14626			3.54927e+06	16110126	4.87333e+06	0.220313	0.302501	1.37305
1678	0	6328	14626			2795362	10450265	2909125	0.267492	0.278378	1.0407
1679	0	6408	14626			3.33573e+06	11835878	3.67005e+06	0.281832	0.310079	1.10022
1680	0	6488	14626			2.44203e+06	8.19201e+06	3049270	0.298099	0.372225	1.24866
1681	0	6568	14626			2.4776e+06	6.33153e+06	2215778	0.391312	0.349959	0.894324
1682	0	6648	14626			1.8718e+06	5499665	2.16939e+06	0.340349	0.394458	1.15898
1683	0	6728	14626			2.14286e+06	6477514	2.58552e+06	0.330815	0.399154	1.20658
1684	0	6808	14626			1.89989e+06	6.19259e+06	1.97126e+06	0.306801	0.318326	1.03757
1685	0	6888	14626			1.79294e+06	5547706	1959251	0.323187	0.353164	1.09276
1686	0	6968	14626			2127127	6003291	2298512	0.354327	0.382875	1.08057
1687	0	7048	14626			1.77046e+06	5331225	1.85104e+06	0.332093	0.347207	1.04551
1688	0	7128	14626			2.15977e+06	5.81657e+06	2.0952e+06	0.371314	0.360213	0.970105
1689	0	7208	14626			2.45289e+06	5396003	1685094	0.454576	0.312286	0.686982
1690	0	7288	14626			2135411	4.66406e+06	1.65492e+06	0.457843	0.354824	0.77499
1691	0	7368	14626			2.43268e+06	5682551	1.90763e+06	0.428096	0.335699	0.784168
1692	0	7448	14626			2.82126e+06	7126773	2.29254e+06	0.395868	0.32168	0.812594
1693	0	7528	14626			3.22517e+06	7328837	2.42494e+06	0.440065	0.330877	0.751881
1694	0	7608	14626			1.93194e+06	5.58179e+06	1909443	0.346115	0.342084	0.988354
1695	0	7688	14626			3.15823e+06	7.7472e+06	2.28456e+06	0.407661	0.294888	0.723366
1696	0	7768	14626			2.87299e+06	7208343	2153029	0.398565	0.298686	0.749402
1697	0	7848	14626			2.99901e+06	7.14306e+06	2.04941e+06	0.41985	0.286909	0.683362
1698	0	7928	14626			3949803	8599929	2.73245e+06	0.459283	0.31773	0.691795
1699	0	8008	14626			3.27946e+06	7.7782e+06	2499490	0.421622	0.321346	0.762165
1700	0	8088	14626			3.20385e+06	6.81551e+06	2.08983e+06	0.470082	0.306628	0.652286
1701	0	8168	14626			3.37467e+06	7261365	1943643	0.464744	0.267669	0.57595
1702	0	8248	14626			3591665	7.41352e+06	2.11121e+06	0.484475	0.284779	0.587809
1703	0	8328	14626			3.72322e+06	7296199	1.83442e+06	0.510295	0.251421	0.492696
1704	0	8408	14626			3.90668e+06	7.0248e+06	2241009	0.556126	0.319014	0.573636
1705	0	8488	14626			4.09507e+06	7.7816e+06	1.97109e+06	0.52625	0.253302	0.481334
1706	0	8568	14626			3.12181e+06	6.00928e+06	2.04756e+06	0.519499	0.340733	0.655887
1707	0	8648	14626			2519267	6442547	1.59118e+06	0.391036	0.246979	0.631603
1708	0	8728	14626			2476260	5.25902e+06	1252588	0.47086	0.238179	0.505839
1709	0	8808	14626			1.97936e+06	4374310	1.30014e+06	0.452498	0.297222	0.656847
1710	0	8888	14626			1.56132e+06	3.36063e+06	713736	0.464592	0.212381	0.457135
1711	0	8968	14626			1.13238e+06	2.74336e+06	690605	0.412773	0.251737	0.609868
1712	0	9048	14626			1.52742e+06	4105570	942938	0.372036	0.229673	0.61734
1713	0	9128	14626			1155990	2.97004e+06	780903	0.389217	0.262927	0.675527
1714	0	728	14546			1.6685e+06	4.58101e+06	1.21087e+06	0.36422	0.264324	0.725726
1715	0	808	14546			2.0666e+06	5.42524e+06	1.19914e+06	0.380924	0.221029	0.580245
1716	0	888	14546			2.22028e+06	5.64915e+06	1.66667e+06	0.393029	0.295031	0.75066
1717	0	968	14546			1.10615e+06	4.18936e+06	1.0931e+06	0.264039	0.260922	0.988198
1718	0	1048	14546			568208	2.21016e+06	587352	0.257089	0.265751	1.03369
1719	0	1128	14546			467841	2.04704e+06	524493	0.228545	0.25622	1.12109
1720	0	1208	14546			693089	2070615	664962	0.334726	0.321142	0.959418
1721	0	1288	14546			1.78752e+06	4.55671e+06	1.41952e+06	0.392284	0.311524	0.794128
1722	0	1368	14546			1.87311e+06	5176136	1.56882e+06	0.361874	0.303086	0.837545
1723	0	1448	14546			1.60222e+06	3708797	1.2203e+06	0.432004	0.329029	0.761634
1724	0	1528	14546			1.57823e+06	3.98293e+06	1.03966e+06	0.396249	0.261029	0.658749
1725	0	1608	14546			1.19269e+06	3800383	1.33033e+06	0.313833	0.350051	1.1154
1726	0	1688	14546			1.39845e+06	3.48457e+06	1.09281e+06	0.401327	0.313614	0.781443
1727	0	1768	14546			1.24532e+06	3.7018e+06	1266911	0.33641	0.342242	1.01734
1728	0	1848	14546			1.11188e+06	3.70296e+06	1.43659e+06	0.300269	0.387958	1.29204
1729	0	1928	14546			1604729	5337724	1.92614e+06	0.300639	0.360854	1.20029
1730	0	2008	14546			1.40138e+06	4210370	1.98982e+06	0.33284	0.4726	1.4199
1731	0	2088	14546			1345550	3.87831e+06	1.61306e+06	0.346943	0.415919	1.19881
1732	0	2168	14546			1595814	4.94601e+06	2.18574e+06	0.322647	0.44192	1.36967
1733	0	2248	14546			802754	5.05592e+06	1.59067e+06	0.158775	0.314616	1.98152
1734	0	2328	14546			1167854	9708190	2.75565e+06	0.120296	0.283848	2.35958
1735	0	2408	14546			1.10917e+06	8024909	2.3478e+06	0.138216	0.292564	2.11671
1736	0	2488	14546			767328	4.81252e+06	1.76959e+06	0.159444	0.367705	2.30617
1737	0	2568	14546			554290	4625940	1.6936e+06	0.119822	0.366108	3.05543
1738	0	2648	14546			993673	7.96779e+06	2.66522e+06	0.124711	0.334499	2.68219
1739	0	2728	14546			390460	3.32945e+06	1.22795e+06	0.117275	0.368813	3.14487
1740	0	2808	14546			976233	4.86862e+06	1.9861e+06	0.200515	0.407939	2.03445
1741	0	2888	14546			942001	4.70279e+06	1.84637e+06	0.200307	0.392612	1.96005
1742	0	2968	14546			901936	4.13258e+06	1.52703e+06	0.21825	0.36951	1.69306
1743	0	3048	14546			1.09798e+06	5.34412e+06	1.72465e+06	0.205456	0.322719	1.57075
1744	0	3128	14546			1.83082e+06	8593668	2.91374e+06	0.213043	0.339056	1.59149
1745	0	3208	14546			1.99882e+06	9367518	3.34476e+06	0.213378	0.357059	1.67337
1746	0	3288	14546			2.25835e+06	11551921	3.57953e+06	0.195496	0.309865	1.58502
1747	0	3368	14546			2.15146e+06	11514206	4.04447e+06	0.186853	0.351259	1.87987
1748	0	3448	14546			2.20104e+06	10655378	4.05212e+06	0.206567	0.380288	1.841
1749	0	3528	14546			2.89762e+06	12839670	4.26264e+06	0.225677	0.33199	1.47108
1750	0	3608	14546			2.72531e+06	11280737	3.77963e+06	0.24159	0.335052	1.38686
1751	0	3688	14546			2.1793e+06	10793876	3549945	0.201901	0.328885	1.62894
1752	0	3768	14546			1.69388e+06	7.18677e+06	2.43223e+06	0.235694	0.338431	1.43589
1753	0	3848	14546			1.49886e+06	6.19815e+06	1.82701e+06	0.241824	0.294767	1.21894
1754	0	3928	14546			1.57788e+06	4513417	1.80675e+06	0.349599	0.400307	1.14505
1755	0	4008	14546			1.37309e+06	4.50617e+06	1.44878e+06	0.304714	0.32151	1.05512
1756	0	4088	14546			1.69798e+06	4946517	1.69472e+06	0.343267	0.342608	0.99808
1757	0	4168	14546			1.91956e+06	5934947	1862342	0.323434	0.313793	0.97019
1758	0	4248	14546			1.9717e+06	6057965	1.70707e+06	0.325472	0.28179	0.865789
1759	0	4328	14546			1.83889e+06	6056632	1.75232e+06	0.303615	0.289322	0.952924
1760	0	4408	14546			2.5999e+06	7.58046e+06	2.27907e+06	0.342975	0.30065	0.876596
1761	0	4488	14546			2.60221e+06	8508707	2.78504e+06	0.30583	0.327317	1.07026
1762	0	4568	14546			2.87905e+06	9153046	2.87808e+06	0.314546	0.31444	0.999665
1763	0	4648	14546			2990076	8471816	2.68513e+06	0.352944	0.316948	0.898013
1764	0	4728	14546			3330864	10210257	2.89851e+06	0.326227	0.283882	0.870198
1765	0	4808	14546			4092055	11428684	3.82074e+06	0.358051	0.334312	0.933698
1766	0	4888	14546			3.77058e+06	11219585	3.5197e+06	0.336071	0.31371	0.933463
1767	0	4968	14546			3.93605e+06	10191417	3.44338e+06	0.386212	0.337871	0.874832
1768	0	5048	14546			3.41628e+06	9797686	3.343e+06	0.348682	0.341203	0.978551
1769	0	5128	14546			3.21849e+06	8837456	2.81439e+06	0.364187	0.318461	0.874444
1770	0	5208	14546			2.71511e+06	7038502	2724702	0.385752	0.387114	1.00353
1771	0	5288	14546			3.2233e+06	9047425	2.86072e+06	0.356268	0.316192	0.887512
1772	0	5368	14546			3.28685e+06	9144026	3.10356e+06	0.359454	0.339408	0.944234
1773	0	5448	14546			2.45985e+06	7182363	2.53893e+06	0.342485	0.353495	1.03215
1774	0	5528	14546			1.97497e+06	5395917	1.90024e+06	0.366012	0.352162	0.96216
1775	0	5608	14546			2.31166e+06	7057998	2589261	0.327524	0.366855	1.12009
1776	0	5688	14546			2493306	8444622	2873031	0.295254	0.34022	1.1523
1777	0	5768	14546			2.34381e+06	7.45342e+06	2.67547e+06	0.314461	0.358959	1.14151
1778	0	5848	14546			1.90661e+06	6077686	1.76257e+06	0.313707	0.290006	0.924449
1779	0	5928	14546			1.89408e+06	6.41262e+06	2432302	0.295368	0.379299	1.28416
1780	0	6008	14546			2.12166e+06	7.12906e+06	2.88275e+06	0.297607	0.404366	1.35873
1781	0	6088	14546			2.38748e+06	7.32391e+06	2607816	0.325984	0.356069	1.09229
1782	0	6168	14546			2809362	11025423	3894741	0.254808	0.353251	1.38634
1783	0	6248	14546			4.02197e+06	16292106	5.30147e+06	0.246866	0.325401	1.31813
1784	0	6328	14546			3.72613e+06	14147931	4093839	0.263369	0.28936	1.09868
1785	0	6408	14546			3.27101e+06	9425937	3.22907e+06	0.347023	0.342572	0.987177
1786	0	6488	14546			2.88357e+06	7.77996e+06	2926932	0.370641	0.376214	1.01504
1787	0	6568	14546			2.51273e+06	6.21251e+06	2.18865e+06	0.404462	0.352297	0.871026
1788	0	6648	14546			2.07904e+06	5447175	2.12248e+06	0.381672	0.389648	1.0209
1789	0	6728	14546			2.10392e+06	6668005	2.24719e+06	0.315525	0.337011	1.0681
1790	0	6808	14546			1.6551e+06	5.05009e+06	1.6766e+06	0.327736	0.331994	1.01299
1791	0	6888	14546			1383477	5.23549e+06	1.86884e+06	0.26425	0.356955	1.35083
1792	0	6968	14546			1.76989e+06	4613374	1621062	0.383644	0.351383	0.915909
1793	0	7048	14546			1.74707e+06	4790411	1.79407e+06	0.364701	0.374513	1.0269
1794	0	7128	14546			2.0943e+06	6.2621e+06	2.19365e+06	0.33444	0.350306	1.04744
1795	0	7208	14546			2854644	6.37916e+06	2.50497e+06	0.447495	0.392681	0.877508
1796	0	7288	14546			2417697	6252701	2120979	0.386664	0.33921	0.877272
1797	0	7368	14546			1.97762e+06	4.37867e+06	1.42359e+06	0.451648	0.325119	0.719851
1798	0	7448	14546			1.75091e+06	3.90343e+06	1.64468e+06	0.448556	0.421341	0.939328
1799	0	7528	14546			1.85326e+06	5.03398e+06	1.7924e+06	0.368149	0.356061	0.967166
1800	0	7608	14546			1888332	4.76563e+06	1.75552e+06	0.396239	0.368371	0.929668
1801	0	7688	14546			2.51118e+06	6159379	1.71275e+06	0.4077	0.278073	0.682052
1802	0	7768	14546			2.8049e+06	6031304	2015857	0.465056	0.334232	0.718692
1803	0	7848	14546			3431059	6.54852e+06	2.48187e+06	0.523944	0.378997	0.723353
1804	0	7928	14546			3.03357e+06	7.70075e+06	2.1811e+06	0.393931	0.283232	0.718989
1805	0	8008	14546			3.07905e+06	7018300	2.42564e+06	0.438717	0.345617	0.78779
1806	0	8088	14546			3.00691e+06	6563414	1.91373e+06	0.458131	0.291576	0.636446
1807	0	8168	14546			3.64102e+06	7501685	2.13311e+06	0.485361	0.284351	0.585855
1808	0	8248	14546			3.51921e+06	7.19622e+06	1.63271e+06	0.489036	0.226885	0.463943
1809	0	8328	14546			3.57463e+06	7112233	2.02238e+06	0.502604	0.284352	0.565758
1810	0	8408	14546			4.17217e+06	7.60494e+06	2.10749e+06	0.548613	0.277122	0.505131
1811	0	8488	14546			3.71194e+06	7.54392e+06	1.8268e+06	0.492044	0.242156	0.492143
1812	0	8568	14546			3.93894e+06	7788499	1.98801e+06	0.505738	0.255249	0.504707
1813	0	8648	14546			3485976	7.54509e+06	1.75988e+06	0.462019	0.233249	0.504847
1814	0	8728	14546			2.79483e+06	5.67484e+06	1.25643e+06	0.492496	0.221404	0.449555
1815	0	8808	14546			2.35097e+06	4.58e+06	974970	0.513312	0.212875	0.414709
1816	0	8888	14546			1.97604e+06	4.61677e+06	1.12982e+06	0.428014	0.24472	0.571758
1817	0	8968	14546			1201684	2.97376e+06	779520	0.404096	0.262133	0.64869
1818	0	9048	14546			849490	2.24382e+06	624467	0.378591	0.278305	0.735108
1819	0	9128	14546			709866	1.77225e+06	461937	0.400545	0.260649	0.650738
1820	0	9208	14546			79122.4	215690	66589.1	0.366835	0.308726	0.841596
1821	0	648	14466			394985	1274424	482944	0.309932	0.378951	1.22269
1822	0	728	14466			967332	2.56942e+06	953025	0.376479	0.370911	0.98521
1823	0	808	14466			1257188	4.0298e+06	1.23065e+06	0.311973	0.305387	0.97889
1824	0	888	14466			2745927	7988323	2.1152e+06	0.343743	0.264787	0.770306
1825	0	968	14466			2.63642e+06	8612454	2.46114e+06	0.306117	0.285766	0.933517
1826	0	1048	14466			1.90336e+06	6.62718e+06	1.65694e+06	0.287206	0.250021	0.870531
1827	0	1128	14466			1.55821e+06	4.69434e+06	1.39821e+06	0.331934	0.297849	0.897314
1828	0	1208	14466			1.88529e+06	5676174	1.52679e+06	0.33214	0.268983	0.809846
1829	0	1288	14466			1.67279e+06	4173324	1.53048e+06	0.400828	0.36673	0.914931
1830	0	1368	14466			1.53006e+06	4089930	1.15708e+06	0.374104	0.28291	0.756233
1831	0	1448	14466			1149749	2787462	1.05165e+06	0.412472	0.377279	0.914678
1832	0	1528	14466			1.07251e+06	2.77337e+06	889670	0.386716	0.32079	0.829524
1833	0	1608	14466			1.28859e+06	3.00924e+06	1.16293e+06	0.428212	0.386454	0.902482
1834	0	1688	14466			1565073	3757759	1.1825e+06	0.416491	0.314683	0.755557
1835	0	1768	14466			1.14318e+06	3233290	1150770	0.353566	0.355913	1.00664
1836	0	1848	14466			1238529	3175012	1.19839e+06	0.390086	0.377443	0.967589
1837	0	1928	14466			1.4176e+06	3.80544e+06	1.77652e+06	0.372519	0.466839	1.2532
1838	0	2008	14466			1.15089e+06	3.6691e+06	1.43446e+06	0.313672	0.390958	1.24639
1839	0	2088	14466			1.44536e+06	4023365	1920149	0.359242	0.47725	1.32849
1840	0	2168	14466			1.43139e+06	4.73472e+06	2458521	0.302318	0.519253	1.71757
1841	0	2248	14466			926268	4212401	1.70272e+06	0.219891	0.404216	1.83826
1842	0	2328	14466			1.03313e+06	6705651	2.02806e+06	0.154068	0.302441	1.96303
1843	0	2408	14466			678262	4769933	1.65472e+06	0.142195	0.346907	2.43965
1844	0	2488	14466			609420	5938613	1.84796e+06	0.10262	0.311177	3.03232
1845	0	2568	14466			630936	4941589	2.00035e+06	0.127679	0.404798	3.17045
1846	0	2648	14466			646373	5.01584e+06	1.98714e+06	0.128866	0.396173	3.07429
1847	0	2728	14466			915599	5.26604e+06	2.22846e+06	0.173869	0.423177	2.43389
1848	0	2808	14466			1.01302e+06	4668760	2.06001e+06	0.216978	0.441234	2.03354
1849	0	2888	14466			1.1365e+06	5.31667e+06	2.38245e+06	0.213762	0.44811	2.0963
1850	0	2968	14466			1.15553e+06	4.74888e+06	1.92877e+06	0.243328	0.406152	1.66916
1851	0	3048	14466			1.67735e+06	6.93284e+06	2500032	0.241942	0.360607	1.49047
1852	0	3128	14466			1.66713e+06	7.5058e+06	3031627	0.222112	0.403905	1.81847
1853	0	3208	14466			1.50094e+06	6.769e+06	2.7446e+06	0.221737	0.405466	1.82859
1854	0	3288	14466			1.82888e+06	8556916	2.85612e+06	0.213732	0.333779	1.56167
1855	0	3368	14466			1.86679e+06	7.53701e+06	2.91959e+06	0.247683	0.387366	1.56396
1856	0	3448	14466			2.06362e+06	8432505	2685656	0.244722	0.318489	1.30143
1857	0	3528	14466			2.15753e+06	8963159	2.99328e+06	0.240711	0.333954	1.38736
1858	0	3608	14466			2.08916e+06	9424446	3.11533e+06	0.221675	0.330558	1.49119
1859	0	3688	14466			2.20947e+06	8396265	2.76445e+06	0.263149	0.329248	1.25119
1860	0	3768	14466			2.06434e+06	8050485	2.45258e+06	0.256424	0.30465	1.18807
1861	0	3848	14466			2.2622e+06	7.32916e+06	2.48461e+06	0.308657	0.339003	1.09831
1862	0	3928	14466			2.05781e+06	7296514	2508472	0.282026	0.34379	1.219
1863	0	4008	14466			2.04119e+06	6.9161e+06	1.99729e+06	0.295136	0.288789	0.978493
1864	0	4088	14466			1.86179e+06	5299073	1.98554e+06	0.351343	0.374695	1.06647
1865	0	4168	14466			1584466	5091584	1.42435e+06	0.311193	0.279745	0.898944
1866	0	4248	14466			1.33762e+06	4.73151e+06	1.41488e+06	0.282705	0.299033	1.05775
1867	0	4328	14466			2155959	6141696	2.23772e+06	0.351036	0.364348	1.03792
1868	0	4408	14466			2.72145e+06	7.8726e+06	2.35814e+06	0.345686	0.299538	0.866502
1869	0	4488	14466			3235719	8675741	3.16825e+06	0.372962	0.365185	0.97915
1870	0	4568	14466			3.1841e+06	9459693	2862074	0.336596	0.302555	0.898865
1871	0	4648	14466			3325969	8846635	2.83199e+06	0.375959	0.32012	0.851477
1872	0	4728	14466			3.70524e+06	11037317	3.14722e+06	0.335701	0.285143	0.849396
1873	0	4808	14466			5346438	15723561	4.50798e+06	0.340027	0.286702	0.843175
1874	0	4888	14466			4224122	12007143	3393444	0.351801	0.282619	0.803349
1875	0	4968	14466			5428302	17246872	5006581	0.314741	0.290289	0.922311
1876	0	5048	14466			3529416	9514958	3256624	0.370933	0.342264	0.922709
1877	0	5128	14466			3.35151e+06	8.02694e+06	3.19119e+06	0.417533	0.39756	0.952164
1878	0	5208	14466			3.22751e+06	9540294	3.2496e+06	0.338303	0.340618	1.00684
1879	0	5288	14466			3.69761e+06	9194503	3.55136e+06	0.402154	0.386248	0.960449
1880	0	5368	14466			3.57707e+06	9859505	3279884	0.362804	0.332662	0.916919
1881	0	5448	14466			3031543	8810224	2.92653e+06	0.344094	0.332174	0.96536
1882	0	5528	14466			2.51191e+06	7.75203e+06	2467124	0.324032	0.318255	0.982172
1883	0	5608	14466			2775828	7655126	2847134	0.36261	0.371925	1.02569
1884	0	5688	14466			1.96295e+06	7.16318e+06	2.38706e+06	0.274034	0.33324	1.21605
1885	0	5768	14466			1600290	6.77982e+06	2.32834e+06	0.236037	0.343421	1.45495
1886	0	5848	14466			2.50722e+06	7845702	3.38219e+06	0.319567	0.431088	1.34898
1887	0	5928	14466			2.34468e+06	7853059	2.78561e+06	0.29857	0.354716	1.18805
1888	0	6008	14466			2.58198e+06	8673704	2.99519e+06	0.29768	0.345318	1.16003
1889	0	6088	14466			2.70353e+06	8287608	3.13859e+06	0.326213	0.378708	1.16092
1890	0	6168	14466			2.28486e+06	7484160	3.12654e+06	0.305292	0.417754	1.36837
1891	0	6248	14466			2.76652e+06	9639746	3.75287e+06	0.286991	0.389312	1.35653
1892	0	6328	14466			2.62088e+06	9185131	3.36567e+06	0.285339	0.366426	1.28418
1893	0	6408	14466			4037266	12227563	4.16419e+06	0.330177	0.340558	1.03144
1894	0	6488	14466			2.52726e+06	6.90997e+06	2.39623e+06	0.365741	0.346779	0.948154
1895	0	6568	14466			1.87649e+06	5871389	1928737	0.319598	0.328498	1.02785
1896	0	6648	14466			1.75134e+06	5.2107e+06	2323518	0.336104	0.445913	1.32671
1897	0	6728	14466			1.81723e+06	5453898	2.07188e+06	0.333198	0.37989	1.14013
1898	0	6808	14466			2.17138e+06	5.67765e+06	2.39704e+06	0.382443	0.422188	1.10392
1899	0	6888	14466			1.81796e+06	5.76553e+06	2.06547e+06	0.315315	0.358245	1.13615
1900	0	6968	14466			2.089e+06	5213372	2.06353e+06	0.400701	0.395815	0.987805
1901	0	7048	14466			1.94717e+06	5.8967e+06	2.01803e+06	0.330213	0.34223	1.03639
1902	0	7128	14466			1.29965e+06	4144837	1.44154e+06	0.31356	0.347792	1.10917
1903	0	7208	14466			2.82254e+06	9102732	3.34078e+06	0.310076	0.367008	1.18361
1904	0	7288	14466			2498519	8843822	3371976	0.282516	0.38128	1.34959
1905	0	7368	14466			2.07838e+06	5462038	1.90138e+06	0.380514	0.348108	0.914836
1906	0	7448	14466			1.77138e+06	4689655	1.45034e+06	0.37772	0.309263	0.818762
1907	0	7528	14466			1.7483e+06	3.70222e+06	1.23763e+06	0.472231	0.334293	0.7079
1908	0	7608	14466			1.55015e+06	4797737	1.50528e+06	0.323099	0.313748	0.971057
1909	0	7688	14466			2042759	4820000	1.29619e+06	0.423809	0.268919	0.634529
1910	0	7768	14466			2.66538e+06	5.54735e+06	1.92201e+06	0.480479	0.346474	0.721101
1911	0	7848	14466			3.06897e+06	6.4292e+06	2162695	0.477349	0.336386	0.704697
1912	0	7928	14466			3.33347e+06	6346356	2.02954e+06	0.525258	0.319796	0.608837
1913	0	8008	14466			3.21557e+06	6829728	1.88871e+06	0.47082	0.276542	0.587362
1914	0	8088	14466			2.79713e+06	6491718	2.18522e+06	0.430877	0.336616	0.781234
1915	0	8168	14466			3.48644e+06	7.05723e+06	1.90657e+06	0.494024	0.270159	0.546854
1916	0	8248	14466			3.76363e+06	7746290	2.22963e+06	0.485862	0.287832	0.592416
1917	0	8328	14466			3.90543e+06	7.74694e+06	2.24871e+06	0.504125	0.290271	0.575792
1918	0	8408	14466			4281391	8341241	2127914	0.51328	0.255108	0.497015
1919	0	8488	14466			3.90999e+06	6588265	2124758	0.593478	0.322506	0.543418
1920	0	8568	14466			4544823	9361745	2.56583e+06	0.485468	0.274076	0.564561
1921	0	8648	14466			4.01235e+06	8278029	2.5145e+06	0.484699	0.303756	0.62669
1922	0	8728	14466			2.89397e+06	6620609	1.80739e+06	0.437115	0.272995	0.624537
1923	0	8808	14466			2.59223e+06	4.93055e+06	1426845	0.525748	0.289388	0.550432
1924	0	8888	14466			1.98299e+06	3.89287e+06	1.10812e+06	0.50939	0.284654	0.558813
1925	0	8968	14466			1.64351e+06	3.67441e+06	1.06102e+06	0.447285	0.28876	0.645583
1926	0	9048	14466			1.21812e+06	2.63714e+06	669434	0.46191	0.253849	0.549562
1927	0	9128	14466			805959	2.41342e+06	549904	0.333949	0.227853	0.682298
1928	0	9208	14466			1.01264e+06	3.01325e+06	810863	0.336061	0.269099	0.800743
1929	0	568	14386			425958	1.05626e+06	2359.12	0.403269	0.002233	0.00553839
1930	0	648	14386			1064509	2.1181e+06	700374	0.502577	0.330661	0.657931
1931	0	728	14386			1.07811e+06	2.39035e+06	868039	0.451024	0.363143	0.805152
1932	0	808	14386			1.28254e+06	3.23867e+06	1.13601e+06	0.396008	0.350765	0.885752
1933	0	888	14386			3420587	8456412	2376066	0.404496	0.280978	0.694637
1934	0	968	14386			2362157	7.2845e+06	2215497	0.324272	0.304138	0.937913
1935	0	1048	14386			724106	4062969	860720	0.178221	0.211845	1.18867
1936	0	1128	14386			651058	3.00672e+06	851934	0.216534	0.283343	1.30854
1937	0	1208	14386			994651	3.88101e+06	1.27615e+06	0.256287	0.328819	1.28301
1938	0	1288	14386			2244096	5.2637e+06	1.86294e+06	0.426334	0.353923	0.830154
1939	0	1368	14386			2.08354e+06	4.93633e+06	1.57456e+06	0.422082	0.318974	0.755716
1940	0	1448	14386			1.68413e+06	4.05398e+06	1.32076e+06	0.415427	0.325794	0.784237
1941	0	1528	14386			527786	1.70804e+06	560114	0.309001	0.327928	1.06125
1942	0	1608	14386			1.58235e+06	3.61828e+06	1.209e+06	0.437321	0.334136	0.764053
1943	0	1688	14386			1.24039e+06	3.26515e+06	1.22266e+06	0.379887	0.374458	0.985709
1944	0	1768	14386			891070	2985263	1.09641e+06	0.298489	0.367273	1.23044
1945	0	1848	14386			1524175	3030585	1.10045e+06	0.502931	0.363115	0.721997
1946	0	1928	14386			1.34065e+06	3894718	1569508	0.344223	0.402984	1.17071
1947	0	2008	14386			1299007	3.3659e+06	1.19256e+06	0.385932	0.354305	0.918051
1948	0	2088	14386			1.22573e+06	3582685	1.38942e+06	0.342125	0.387817	1.13355
1949	0	2168	14386			1.42258e+06	4.83507e+06	2.36757e+06	0.294221	0.489667	1.66428
1950	0	2248	14386			644743	3.98136e+06	1636728	0.161941	0.411098	2.53857
1951	0	2328	14386			742838	4.62421e+06	1.46005e+06	0.160641	0.31574	1.9655
1952	0	2408	14386			358119	3.49054e+06	1.51621e+06	0.102597	0.434377	4.23381
1953	0	2488	14386			579076	5199830	1.68704e+06	0.111364	0.324442	2.91333
1954	0	2568	14386			708123	4893876	1927780	0.144696	0.393917	2.72238
1955	0	2648	14386			1.13402e+06	5.20173e+06	2.38022e+06	0.218008	0.457583	2.09892
1956	0	2728	14386			1.39325e+06	6270975	2674487	0.222174	0.426487	1.91961
1957	0	2808	14386			1.29329e+06	5941765	2.66499e+06	0.217661	0.448518	2.06063
1958	0	2888	14386			1.16697e+06	5777881	2377253	0.201972	0.41144	2.03711
1959	0	2968	14386			1.34915e+06	6862029	2.44198e+06	0.196611	0.355869	1.81001
1960	0	3048	14386			1.62012e+06	6018131	2.50454e+06	0.269207	0.416165	1.54589
1961	0	3128	14386			2128352	6697718	2769644	0.317773	0.413521	1.30131
1962	0	3208	14386			1.73183e+06	7.62361e+06	3.03728e+06	0.227166	0.398404	1.7538
1963	0	3288	14386			1.79006e+06	7.83482e+06	2361842	0.228474	0.301454	1.31942
1964	0	3368	14386			1.84815e+06	7.41351e+06	2.44612e+06	0.249295	0.329955	1.32355
1965	0	3448	14386			2.16209e+06	7.85435e+06	3.01402e+06	0.275273	0.383739	1.39403
1966	0	3528	14386			1.80967e+06	6646390	2.55447e+06	0.272279	0.384339	1.41156
1967	0	3608	14386			1.79098e+06	6.63133e+06	2.34344e+06	0.270079	0.35339	1.30847
1968	0	3688	14386			1.84757e+06	7.05891e+06	2283169	0.261735	0.323445	1.23577
1969	0	3768	14386			2.06574e+06	7176308	2299225	0.287855	0.320391	1.11303
1970	0	3848	14386			2.3048e+06	8733436	2.67294e+06	0.263906	0.306058	1.15972
1971	0	3928	14386			1.73467e+06	6088237	1835143	0.284922	0.301424	1.05792
1972	0	4008	14386			1.47199e+06	4.30372e+06	1.51775e+06	0.342026	0.35266	1.03109
1973	0	4088	14386			2.22182e+06	6.36183e+06	1.91322e+06	0.349243	0.300735	0.861105
1974	0	4168	14386			2130345	5569465	1928526	0.382504	0.346268	0.905265
1975	0	4248	14386			1.84614e+06	4.79442e+06	1.5364e+06	0.385061	0.320455	0.83222
1976	0	4328	14386			2424756	6772149	2.1724e+06	0.358048	0.320784	0.895924
1977	0	4408	14386			2.6303e+06	7.62178e+06	2427861	0.345103	0.318542	0.923036
1978	0	4488	14386			2575116	7750057	2.81776e+06	0.332271	0.363579	1.09423
1979	0	4568	14386			2930761	8795056	2709531	0.333228	0.308074	0.924514
1980	0	4648	14386			3.26218e+06	9216746	2.98506e+06	0.353941	0.323874	0.915051
1981	0	4728	14386			3.10248e+06	9853688	3.00475e+06	0.314855	0.304936	0.968498
1982	0	4808	14386			3.30035e+06	9167401	2977781	0.360009	0.324823	0.902263
1983	0	4888	14386			4.05913e+06	12418081	3552502	0.326873	0.286075	0.875187
1984	0	4968	14386			3869850	12056962	3.6372e+06	0.320964	0.301668	0.93988
1985	0	5048	14386			3.45732e+06	10764115	3.50389e+06	0.321189	0.325516	1.01347
1986	0	5128	14386			3.11981e+06	8.36393e+06	3160278	0.373008	0.377846	1.01297
1987	0	5208	14386			3.58898e+06	8904830	2953358	0.403038	0.331658	0.822896
1988	0	5288	14386			3.70624e+06	10255307	3520896	0.361398	0.343324	0.94999
1989	0	5368	14386			3.67102e+06	10275212	3270959	0.357269	0.318335	0.891023
1990	0	5448	14386			3007451	8303693	3.10557e+06	0.362182	0.373999	1.03263
1991	0	5528	14386			3.16445e+06	8.23156e+06	2.87868e+06	0.384429	0.349713	0.909693
1992	0	5608	14386			2.82155e+06	8537255	2973563	0.330498	0.348304	1.05388
1993	0	5688	14386			3.04207e+06	9054281	2.78622e+06	0.335982	0.307724	0.915894
1994	0	5768	14386			2228903	6.33527e+06	2743783	0.351825	0.433097	1.231
1995	0	5848	14386			2.39331e+06	6.3059e+06	2454337	0.379535	0.389213	1.0255
1996	0	5928	14386			1.57325e+06	5717829	2.09133e+06	0.275148	0.365757	1.32931
1997	0	6008	14386			2.07201e+06	7.40389e+06	2908571	0.279855	0.392844	1.40374
1998	0	6088	14386			2.99838e+06	10612675	4057040	0.282528	0.382283	1.35308
[truncated: 50,088 more rows]

## Sheet: Fig 5G H
spotId	raster	x	y	z	Date	Aspartate/Glutamate	Glutamate/Aspartate
0	0	11370.9	13789.5			0.291555	3.42988
1	0	11442.8	13754.4			0.222886	4.48661
2	0	11514.7	13719.3			0.237046	4.21859
3	0	11586.6	13684.3			0.217242	4.60315
4	0	11658.5	13649.2			0.238874	4.18631
5	0	11730.4	13614.1			0.243769	4.10224
6	0	10976.3	13892.9			0.230932	4.33029
7	0	11048.2	13857.9			0.298322	3.35209
8	0	11120.1	13822.8			0.203676	4.90976
9	0	11192	13787.7			0.247602	4.03874
10	0	11263.9	13752.7			0.23764	4.20804
11	0	11335.8	13717.6			0.250941	3.985
12	0	11407.7	13682.5			0.249269	4.01174
13	0	11479.6	13647.4			0.248644	4.02182
14	0	11551.5	13612.4			0.263407	3.7964
15	0	11623.4	13577.3			0.234264	4.26869
16	0	11695.3	13542.2			0.289454	3.45477
17	0	11767.2	13507.2			0.312062	3.20449
18	0	11839.1	13472.1			0.26806	3.73051
19	0	11911	13437			0.222934	4.48563
20	0	11982.9	13402			0.203416	4.91604
21	0	10653.6	13961.3			0.270853	3.69204
22	0	10725.5	13926.2			0.226772	4.40971
23	0	10797.4	13891.2			0.233433	4.28389
24	0	10869.3	13856.1			0.219121	4.56368
25	0	10941.2	13821			0.224161	4.46107
26	0	11013.1	13786			0.278918	3.58528
27	0	11085	13750.9			0.27285	3.66502
28	0	11156.9	13715.8			0.24508	4.08029
29	0	11228.8	13680.7			0.251202	3.98085
30	0	11300.7	13645.7			0.271484	3.68345
31	0	11372.6	13610.6			0.278263	3.59372
32	0	11444.5	13575.5			0.24398	4.0987
33	0	11516.5	13540.5			0.257752	3.87969
34	0	11588.4	13505.4			0.216962	4.6091
35	0	11660.3	13470.3			0.278467	3.59109
36	0	11732.2	13435.3			0.29795	3.35627
37	0	11804.1	13400.2			0.273148	3.66102
38	0	11876	13365.1			0.266975	3.74567
39	0	11947.9	13330.1			0.273773	3.65266
40	0	12019.8	13295			0.358312	2.79087
41	0	12091.7	13259.9			0.306544	3.26218
42	0	12163.6	13224.8			0.296554	3.37207
43	0	12235.5	13189.8			0.321703	3.10846
44	0	10330.9	14029.7			0.243211	4.11165
45	0	10402.8	13994.6			0.235726	4.24221
46	0	10474.7	13959.5			0.241298	4.14426
47	0	10546.6	13924.5			0.276837	3.61224
48	0	10618.5	13889.4			0.281439	3.55317
49	0	10690.4	13854.3			0.28241	3.54095
50	0	10762.3	13819.3			0.197083	5.074
51	0	10834.2	13784.2			0.227663	4.39245
52	0	10906.2	13749.1			0.230732	4.33403
53	0	10978.1	13714.1			0.230642	4.33572
54	0	11050	13679			0.258469	3.86894
55	0	11121.9	13643.9			0.247152	4.04609
56	0	11193.8	13608.8			0.247765	4.03608
57	0	11265.7	13573.8			0.25086	3.98629
58	0	11337.6	13538.7			0.245117	4.07968
59	0	11409.5	13503.6			0.285425	3.50355
60	0	11481.4	13468.6			0.238508	4.19273
61	0	11553.3	13433.5			0.222175	4.50095
62	0	11625.2	13398.4			0.224903	4.44636
63	0	11697.1	13363.4			0.269145	3.71546
64	0	11769	13328.3			0.274315	3.64545
65	0	11840.9	13293.2			0.22457	4.45296
66	0	11912.8	13258.1			0.252087	3.96689
67	0	11984.7	13223.1			0.2494	4.00963
68	0	12056.6	13188			0.273767	3.65274
69	0	12128.5	13152.9			0.239692	4.17201
70	0	12200.4	13117.9			0.256792	3.8942
71	0	12272.3	13082.8			0.267965	3.73182
72	0	12344.2	13047.7			0.295496	3.38415
73	0	12416.1	13012.7			0.20269	4.93363
74	0	12488	12977.6			0.307763	3.24926
75	0	12559.9	12942.5			0.225958	4.42559
76	0	9936.34	14133.1			0.342234	2.92197
77	0	10008.2	14098.1			0.28881	3.46248
78	0	10080.1	14063			0.293332	3.4091
79	0	10152	14027.9			0.253297	3.94793
80	0	10224	13992.8			0.255697	3.91088
81	0	10295.9	13957.8			0.282062	3.54532
82	0	10367.8	13922.7			0.23191	4.31202
83	0	10439.7	13887.6			0.174057	5.74525
84	0	10511.6	13852.6			0.226898	4.40727
85	0	10583.5	13817.5			0.232577	4.29966
86	0	10655.4	13782.4			0.241089	4.14785
87	0	10727.3	13747.4			0.234154	4.27069
88	0	10799.2	13712.3			0.239113	4.18213
89	0	10871.1	13677.2			0.238552	4.19195
90	0	10943	13642.2			0.212338	4.70948
91	0	11014.9	13607.1			0.216009	4.62944
92	0	11086.8	13572			0.240776	4.15323
93	0	11158.7	13536.9			0.23038	4.34066
94	0	11230.6	13501.9			0.2832	3.53107
95	0	11302.5	13466.8			0.241683	4.13766
96	0	11374.4	13431.7			0.24338	4.10879
97	0	11446.3	13396.7			0.240396	4.1598
98	0	11518.2	13361.6			0.266838	3.7476
99	0	11590.1	13326.5			0.257931	3.877
100	0	11662	13291.5			0.274821	3.63873
101	0	11733.9	13256.4			0.256508	3.89851
102	0	11805.8	13221.3			0.231502	4.31961
103	0	11877.7	13186.2			0.287313	3.48053
104	0	11949.6	13151.2			0.240211	4.16301
105	0	12021.5	13116.1			0.265962	3.75993
106	0	12093.4	13081			0.220299	4.53928
107	0	12165.3	13046			0.206787	4.83589
108	0	12237.3	13010.9			0.241021	4.14901
109	0	12309.2	12975.8			0.260143	3.84404
110	0	12381.1	12940.8			0.302202	3.30904
111	0	12453	12905.7			0.275008	3.63626
112	0	12524.9	12870.6			0.271696	3.68058
113	0	12596.8	12835.5			0.305951	3.2685
114	0	12668.7	12800.5			0.336873	2.96848
115	0	12740.6	12765.4			0.26638	3.75404
116	0	12812.5	12730.3			0.246892	4.05036
117	0	9613.65	14201.5			0.341206	2.93078
118	0	9685.56	14166.4			0.316284	3.16172
119	0	9757.46	14131.4			0.243189	4.11203
120	0	9829.36	14096.3			0.226526	4.4145
121	0	9901.27	14061.2			0.293224	3.41036
122	0	9973.17	14026.2			0.311602	3.20922
123	0	10045.1	13991.1			0.258952	3.86171
124	0	10117	13956			0.262566	3.80857
125	0	10188.9	13920.9			0.270606	3.69541
126	0	10260.8	13885.9			0.248655	4.02164
127	0	10332.7	13850.8			0.244591	4.08846
128	0	10404.6	13815.7			0.220124	4.5429
129	0	10476.5	13780.7			0.221626	4.51211
130	0	10548.4	13745.6			0.238144	4.19914
131	0	10620.3	13710.5			0.219184	4.56237
132	0	10692.2	13675.5			0.195983	5.10248
133	0	10764.1	13640.4			0.218719	4.57207
134	0	10836	13605.3			0.256484	3.89888
135	0	10907.9	13570.2			0.229931	4.34914
136	0	10979.8	13535.2			0.230209	4.34388
137	0	11051.7	13500.1			0.239517	4.17507
138	0	11123.6	13465			0.268279	3.72746
139	0	11195.5	13430			0.222332	4.49778
140	0	11267.4	13394.9			0.212714	4.70115
141	0	11339.3	13359.8			0.221729	4.51001
142	0	11411.2	13324.8			0.213811	4.67704
143	0	11483.1	13289.7			0.211929	4.71855
144	0	11555	13254.6			0.237777	4.20562
145	0	11627	13219.6			0.217132	4.6055
146	0	11698.9	13184.5			0.26538	3.76818
147	0	11770.8	13149.4			0.262431	3.81053
148	0	11842.7	13114.3			0.234702	4.26073
149	0	11914.6	13079.3			0.251491	3.97628
150	0	11986.5	13044.2			0.281186	3.55637
151	0	12058.4	13009.1			0.268425	3.72544
152	0	12130.3	12974.1			0.240705	4.15446
153	0	12202.2	12939			0.256126	3.90433
154	0	12274.1	12903.9			0.248681	4.02121
155	0	12346	12868.9			0.246132	4.06286
156	0	12417.9	12833.8			0.288675	3.4641
157	0	12489.8	12798.7			0.262273	3.81283
158	0	12561.7	12763.6			0.247815	4.03526
159	0	12633.6	12728.6			0.205516	4.86581
160	0	12705.5	12693.5			0.280407	3.56625
161	0	12777.4	12658.4			0.257868	3.87796
162	0	12849.3	12623.4			0.276348	3.61862
163	0	12921.2	12588.3			0.208091	4.80558
164	0	9362.87	14234.8			0.290257	3.44522
165	0	9434.78	14199.7			0.353073	2.83227
166	0	9506.68	14164.7			0.271957	3.67705
167	0	9578.58	14129.6			0.328722	3.04209
168	0	9650.49	14094.5			0.256674	3.89599
169	0	9722.39	14059.5			0.291122	3.43499
170	0	9794.29	14024.4			0.305659	3.27162
171	0	9866.2	13989.3			0.274451	3.64363
172	0	9938.1	13954.2			0.282771	3.53643
173	0	10010	13919.2			0.265449	3.7672
174	0	10081.9	13884.1			0.234314	4.26778
175	0	10153.8	13849			0.238593	4.19124
176	0	10225.7	13814			0.240989	4.14956
177	0	10297.6	13778.9			0.235966	4.2379
178	0	10369.5	13743.8			0.254479	3.92959
179	0	10441.4	13708.8			0.220033	4.54477
180	0	10513.3	13673.7			0.269281	3.71359
181	0	10585.2	13638.6			0.213215	4.69011
182	0	10657.1	13603.6			0.199096	5.02271
183	0	10729	13568.5			0.229367	4.35983
184	0	10800.9	13533.4			0.225594	4.43274
185	0	10872.8	13498.3			0.233598	4.28085
186	0	10944.8	13463.3			0.226746	4.41022
187	0	11016.7	13428.2			0.238743	4.18861
188	0	11088.6	13393.1			0.231067	4.32776
189	0	11160.5	13358.1			0.229843	4.3508
190	0	11232.4	13323			0.243821	4.10136
191	0	11304.3	13287.9			0.247677	4.03751
192	0	11376.2	13252.9			0.229433	4.35857
193	0	11448.1	13217.8			0.253789	3.94027
194	0	11520	13182.7			0.266432	3.75331
195	0	11591.9	13147.6			0.234567	4.26317
196	0	11663.8	13112.6			0.265001	3.77357
197	0	11735.7	13077.5			0.268376	3.72612
198	0	11807.6	13042.4			0.245803	4.0683
199	0	11879.5	13007.4			0.254516	3.92903
200	0	11951.4	12972.3			0.2486	4.02252
201	0	12023.3	12937.2			0.261614	3.82243
202	0	12095.2	12902.2			0.279806	3.5739
203	0	12167.1	12867.1			0.285265	3.50552
204	0	12239	12832			0.316854	3.15603
205	0	12310.9	12796.9			0.240029	4.16617
206	0	12382.8	12761.9			0.292486	3.41897
207	0	12454.7	12726.8			0.278113	3.59566
208	0	12526.6	12691.7			0.2322	4.30663
209	0	12598.5	12656.7			0.230539	4.33766
210	0	12670.4	12621.6			0.285382	3.50408
211	0	12742.3	12586.5			0.283554	3.52667
212	0	12814.2	12551.5			0.27627	3.61964
213	0	12886.1	12516.4			0.24508	4.08031
214	0	12958	12481.3			0.225037	4.44372
215	0	9112.09	14268.1			0.301784	3.31363
216	0	9184	14233			0.285966	3.49692
217	0	9255.9	14198			0.300803	3.32443
218	0	9327.8	14162.9			0.303821	3.29141
219	0	9399.71	14127.8			0.290928	3.43728
220	0	9471.61	14092.8			0.322448	3.10127
221	0	9543.51	14057.7			0.321531	3.11012
222	0	9615.42	14022.6			0.295711	3.38168
223	0	9687.32	13987.6			0.344107	2.90608
224	0	9759.23	13952.5			0.259983	3.8464
225	0	9831.13	13917.4			0.279985	3.57163
226	0	9903.03	13882.3			0.253788	3.9403
227	0	9974.94	13847.3			0.243405	4.10837
228	0	10046.8	13812.2			0.245768	4.06887
229	0	10118.7	13777.1			0.258524	3.86811
230	0	10190.6	13742.1			0.247631	4.03826
231	0	10262.5	13707			0.245293	4.07675
232	0	10334.5	13671.9			0.237746	4.20618
233	0	10406.4	13636.9			0.243758	4.10243
234	0	10478.3	13601.8			0.232056	4.30931
235	0	10550.2	13566.7			0.231255	4.32422
236	0	10622.1	13531.6			0.240158	4.16392
237	0	10694	13496.6			0.263407	3.79641
238	0	10765.9	13461.5			0.255865	3.90831
239	0	10837.8	13426.4			0.253072	3.95144
240	0	10909.7	13391.4			0.265117	3.77192
241	0	10981.6	13356.3			0.228115	4.38376
242	0	11053.5	13321.2			0.257101	3.88952
243	0	11125.4	13286.2			0.242266	4.12769
244	0	11197.3	13251.1			0.282228	3.54323
245	0	11269.2	13216			0.23209	4.30867
246	0	11341.1	13181			0.266428	3.75336
247	0	11413	13145.9			0.243994	4.09847
248	0	11484.9	13110.8			0.264279	3.78388
249	0	11556.8	13075.7			0.243615	4.10484
250	0	11628.7	13040.7			0.229634	4.35475
251	0	11700.6	13005.6			0.250204	3.99673
252	0	11772.5	12970.5			0.2365	4.22833
253	0	11844.4	12935.5			0.233484	4.28295
254	0	11916.3	12900.4			0.25868	3.86577
255	0	11988.2	12865.3			0.23995	4.16754
256	0	12060.1	12830.3			0.267789	3.73428
257	0	12132	12795.2			0.290277	3.44499
258	0	12203.9	12760.1			0.325331	3.07379
259	0	12275.8	12725			0.285826	3.49864
260	0	12347.8	12690			0.263426	3.79614
261	0	12419.7	12654.9			0.29617	3.37643
262	0	12491.6	12619.8			0.27249	3.66985
263	0	12563.5	12584.8			0.252091	3.96683
264	0	12635.4	12549.7			0.267045	3.74469
265	0	12707.3	12514.6			0.246032	4.06451
266	0	12779.2	12479.6			0.252494	3.96048
267	0	12851.1	12444.5			0.263329	3.79753
268	0	12923	12409.4			0.308074	3.24597
269	0	12994.9	12374.4			0.309678	3.22916
270	0	13066.8	12339.3			0.374144	2.67277
271	0	8861.31	14301.4			0.377315	2.65031
272	0	8933.22	14266.3			0.608371	1.64373
273	0	9005.12	14231.3			0.389394	2.56809
274	0	9077.02	14196.2			0.316073	3.16383
275	0	9148.93	14161.1			0.303641	3.29336
276	0	9220.83	14126.1			0.281486	3.55257
277	0	9292.73	14091			0.260479	3.83907
278	0	9364.64	14055.9			0.309673	3.22921
279	0	9436.54	14020.9			0.310215	3.22357
280	0	9508.45	13985.8			0.295454	3.38463
281	0	9580.35	13950.7			0.324668	3.08007
282	0	9652.25	13915.7			0.33112	3.02005
283	0	9724.16	13880.6			0.243402	4.10844
284	0	9796.06	13845.5			0.267311	3.74095
285	0	9867.96	13810.4			0.267606	3.73684
286	0	9939.87	13775.4			0.25702	3.89074
287	0	10011.8	13740.3			0.258334	3.87096
288	0	10083.7	13705.2			0.249079	4.01479
289	0	10155.6	13670.2			0.230207	4.34392
290	0	10227.5	13635.1			0.216869	4.61108
291	0	10299.4	13600			0.249777	4.00358
292	0	10371.3	13565			0.22734	4.3987
293	0	10443.2	13529.9			0.243009	4.11507
294	0	10515.1	13494.8			0.230325	4.3417
295	0	10587	13459.7			0.229425	4.35872
296	0	10658.9	13424.7			0.246659	4.05418
297	0	10730.8	13389.6			0.249944	4.00089
298	0	10802.7	13354.5			0.237624	4.20834
299	0	10874.6	13319.5			0.28533	3.50471
300	0	10946.5	13284.4			0.26036	3.84083
301	0	11018.4	13249.3			0.251083	3.98275
302	0	11090.3	13214.3			0.245312	4.07644
303	0	11162.2	13179.2			0.269145	3.71546
304	0	11234.1	13144.1			0.257851	3.87821
305	0	11306	13109			0.248497	4.02419
306	0	11377.9	13074			0.2512	3.98088
307	0	11449.8	13038.9			0.281673	3.55022
308	0	11521.7	13003.8			0.2731	3.66166
309	0	11593.6	12968.8			0.258215	3.87275
310	0	11665.6	12933.7			0.287619	3.47682
311	0	11737.5	12898.6			0.285518	3.50241
312	0	11809.4	12863.6			0.25608	3.90503
313	0	11881.3	12828.5			0.285586	3.50157
314	0	11953.2	12793.4			0.261891	3.81838
315	0	12025.1	12758.4			0.300532	3.32743
316	0	12097	12723.3			0.268951	3.71814
317	0	12168.9	12688.2			0.300266	3.33038
318	0	12240.8	12653.1			0.308062	3.2461
319	0	12312.7	12618.1			0.299423	3.33975
320	0	12384.6	12583			0.300042	3.33287
321	0	12456.5	12547.9			0.258762	3.86455
322	0	12528.4	12512.9			0.29003	3.44792
323	0	12600.3	12477.8			0.246685	4.05375
324	0	12672.2	12442.7			0.265237	3.77021
325	0	12744.1	12407.7			0.288815	3.46243
326	0	12816	12372.6			0.318204	3.14263
327	0	12887.9	12337.5			0.262828	3.80476
328	0	12959.8	12302.4			0.283435	3.52814
329	0	13031.7	12267.4			0.241615	4.13882
330	0	13103.6	12232.3			0.272012	3.67631
331	0	8610.53	14334.7			0.362712	2.75701
332	0	8682.44	14299.7			0.345958	2.89052
333	0	8754.34	14264.6			0.475184	2.10445
334	0	8826.24	14229.5			0.350668	2.8517
335	0	8898.15	14194.4			0.317919	3.14546
336	0	8970.05	14159.4			0.292383	3.42017
337	0	9041.95	14124.3			0.29777	3.35829
338	0	9113.86	14089.2			0.301504	3.31671
339	0	9185.76	14054.2			0.286881	3.48577
340	0	9257.66	14019.1			0.352537	2.83658
341	0	9329.57	13984			0.327216	3.05608
342	0	9401.47	13949			0.290479	3.44259
343	0	9473.38	13913.9			0.296982	3.3672
344	0	9545.28	13878.8			0.294928	3.39066
345	0	9617.18	13843.7			0.292078	3.42374
346	0	9689.09	13808.7			0.277051	3.60944
347	0	9760.99	13773.6			0.234146	4.27084
348	0	9832.89	13738.5			0.278466	3.5911
349	0	9904.8	13703.5			0.271233	3.68686
350	0	9976.7	13668.4			0.279024	3.58392
351	0	10048.6	13633.3			0.290482	3.44256
352	0	10120.5	13598.3			0.256076	3.90509
353	0	10192.4	13563.2			0.268663	3.72213
354	0	10264.3	13528.1			0.24834	4.02674
355	0	10336.2	13493.1			0.253061	3.95161
356	0	10408.1	13458			0.239933	4.16782
357	0	10480	13422.9			0.24421	4.09484
358	0	10551.9	13387.8			0.23203	4.30978
359	0	10623.8	13352.8			0.238959	4.18482
360	0	10695.7	13317.7			0.240706	4.15445
361	0	10767.6	13282.6			0.241135	4.14705
362	0	10839.5	13247.6			0.243771	4.1022
363	0	10911.4	13212.5			0.232372	4.30344
364	0	10983.3	13177.4			0.262659	3.80721
365	0	11055.3	13142.4			0.247116	4.04668
366	0	11127.2	13107.3			0.264671	3.77828
367	0	11199.1	13072.2			0.258636	3.86643
368	0	11271	13037.1			0.272642	3.66781
369	0	11342.9	13002.1			0.287608	3.47696
370	0	11414.8	12967			0.269853	3.70572
371	0	11486.7	12931.9			0.242685	4.12057
372	0	11558.6	12896.9			0.310271	3.22299
373	0	11630.5	12861.8			0.267061	3.74446
374	0	11702.4	12826.7			0.274591	3.64178
375	0	11774.3	12791.7			0.276139	3.62137
376	0	11846.2	12756.6			0.278695	3.58815
377	0	11918.1	12721.5			0.291063	3.43568
378	0	11990	12686.4			0.294226	3.39874
379	0	12061.9	12651.4			0.271694	3.68061
380	0	12133.8	12616.3			0.27548	3.63003
381	0	12205.7	12581.2			0.262467	3.81001
382	0	12277.6	12546.2			0.264858	3.77561
383	0	12349.5	12511.1			0.293611	3.40587
384	0	12421.4	12476			0.29788	3.35706
385	0	12493.3	12441			0.281332	3.55452
386	0	12565.2	12405.9			0.293006	3.41289
387	0	12637.1	12370.8			0.268291	3.72729
388	0	12709	12335.8			0.25837	3.87042
389	0	12780.9	12300.7			0.276498	3.61667
390	0	12852.8	12265.6			0.259573	3.85249
391	0	12924.7	12230.5			0.25073	3.98836
392	0	12996.6	12195.5			0.257625	3.88161
393	0	13068.6	12160.4			0.290616	3.44097
394	0	13140.5	12125.3			0.267725	3.73517
395	0	13212.4	12090.3			0.26793	3.73232
396	0	8359.75	14368			0.40067	2.49582
397	0	8431.66	14333			0.364142	2.74618
398	0	8503.56	14297.9			0.319181	3.13302
399	0	8575.46	14262.8			0.359395	2.78246
400	0	8647.37	14227.8			0.396474	2.52223
401	0	8719.27	14192.7			0.32935	3.03629
402	0	8791.17	14157.6			0.354722	2.81911
403	0	8863.08	14122.5			0.392622	2.54698
404	0	8934.98	14087.5			0.316215	3.1624
405	0	9006.88	14052.4			0.319414	3.13073
406	0	9078.79	14017.3			0.328365	3.0454
407	0	9150.69	13982.3			0.308043	3.2463
408	0	9222.6	13947.2			0.308325	3.24333
409	0	9294.5	13912.1			0.315829	3.16627
410	0	9366.4	13877.1			0.324162	3.08488
411	0	9438.31	13842			0.302083	3.31034
412	0	9510.21	13806.9			0.297963	3.35612
413	0	9582.11	13771.8			0.301108	3.32107
414	0	9654.02	13736.8			0.271036	3.68954
415	0	9725.92	13701.7			0.266385	3.75397
416	0	9797.82	13666.6			0.269407	3.71186
417	0	9869.73	13631.6			0.25589	3.90792
418	0	9941.63	13596.5			0.286146	3.49472
419	0	10013.5	13561.4			0.255736	3.91028
420	0	10085.4	13526.4			0.252994	3.95266
421	0	10157.3	13491.3			0.267953	3.732
422	0	10229.2	13456.2			0.253169	3.94993
423	0	10301.1	13421.1			0.281749	3.54926
424	0	10373.1	13386.1			0.251953	3.96899
425	0	10445	13351			0.254165	3.93446
426	0	10516.9	13315.9			0.257398	3.88503
427	0	10588.8	13280.9			0.267944	3.73212
428	0	10660.7	13245.8			0.266273	3.75554
429	0	10732.6	13210.7			0.261612	3.82245
430	0	10804.5	13175.7			0.282934	3.53439
431	0	10876.4	13140.6			0.259402	3.85502
432	0	10948.3	13105.5			0.294932	3.39061
433	0	11020.2	13070.5			0.2495	4.00802
434	0	11092.1	13035.4			0.295614	3.38279
435	0	11164	13000.3			0.296734	3.37002
436	0	11235.9	12965.2			0.257469	3.88396
437	0	11307.8	12930.2			0.302153	3.30958
438	0	11379.7	12895.1			0.274499	3.643
439	0	11451.6	12860			0.313962	3.1851
440	0	11523.5	12825			0.29477	3.39248
441	0	11595.4	12789.9			0.285471	3.50298
442	0	11667.3	12754.8			0.293083	3.412
443	0	11739.2	12719.8			0.268219	3.7283
444	0	11811.1	12684.7			0.285483	3.50284
445	0	11883	12649.6			0.280296	3.56766
446	0	11954.9	12614.5			0.256751	3.89482
447	0	12026.8	12579.5			0.27917	3.58205
448	0	12098.7	12544.4			0.316858	3.15599
449	0	12170.6	12509.3			0.29273	3.41612
450	0	12242.5	12474.3			0.287242	3.48138
451	0	12314.4	12439.2			0.302241	3.30861
452	0	12386.4	12404.1			0.280364	3.56679
453	0	12458.3	12369.1			0.282725	3.53701
454	0	12530.2	12334			0.277879	3.59869
455	0	12602.1	12298.9			0.295242	3.38705
456	0	12674	12263.8			0.281785	3.5488
457	0	12745.9	12228.8			0.260736	3.8353
458	0	12817.8	12193.7			0.249177	4.01321
459	0	12889.7	12158.6			0.210302	4.75506
460	0	12961.6	12123.6			0.242288	4.12732
461	0	13033.5	12088.5			0.251042	3.9834
462	0	13105.4	12053.4			0.249017	4.01579
463	0	13177.3	12018.4			0.241495	4.14088
464	0	13249.2	11983.3			0.286803	3.48672
465	0	8180.88	14366.3			0.222057	4.50335
466	0	8252.78	14331.2			0.445831	2.243
467	0	8324.68	14296.1			0.277088	3.60897
468	0	8396.59	14261.1			0.301338	3.31853
469	0	8468.49	14226			0.311556	3.2097
470	0	8540.39	14190.9			0.337018	2.9672
471	0	8612.3	14155.8			0.293346	3.40895
472	0	8684.2	14120.8			0.335465	2.98094
473	0	8756.1	14085.7			0.34454	2.90242
474	0	8828.01	14050.6			0.339657	2.94415
475	0	8899.91	14015.6			0.329197	3.03769
476	0	8971.81	13980.5			0.296252	3.37551
477	0	9043.72	13945.4			0.321086	3.11443
478	0	9115.62	13910.4			0.333107	3.00204
479	0	9187.53	13875.3			0.322026	3.10534
480	0	9259.43	13840.2			0.297884	3.35701
481	0	9331.33	13805.2			0.293026	3.41266
482	0	9403.24	13770.1			0.287299	3.48069
483	0	9475.14	13735			0.300411	3.32878
484	0	9547.04	13699.9			0.34084	2.93392
485	0	9618.95	13664.9			0.322758	3.0983
486	0	9690.85	13629.8			0.303463	3.29529
487	0	9762.75	13594.7			0.282805	3.53601
488	0	9834.66	13559.7			0.317119	3.15339
489	0	9906.56	13524.6			0.284546	3.51437
490	0	9978.46	13489.5			0.2873	3.48068
491	0	10050.4	13454.5			0.26215	3.8146
492	0	10122.3	13419.4			0.291523	3.43026
493	0	10194.2	13384.3			0.242009	4.13207
494	0	10266.1	13349.2			0.268995	3.71755
495	0	10338	13314.2			0.274645	3.64106
496	0	10409.9	13279.1			0.267433	3.73925
497	0	10481.8	13244			0.258757	3.86463
498	0	10553.7	13209			0.291677	3.42845
499	0	10625.6	13173.9			0.247134	4.04639
500	0	10697.5	13138.8			0.302456	3.30626
501	0	10769.4	13103.8			0.262402	3.81095
502	0	10841.3	13068.7			0.260719	3.83554
503	0	10913.2	13033.6			0.28396	3.52163
504	0	10985.1	12998.5			0.295359	3.38571
505	0	11057	12963.5			0.284644	3.51316
506	0	11128.9	12928.4			0.287974	3.47254
507	0	11200.8	12893.3			0.30638	3.26392
508	0	11272.7	12858.3			0.271842	3.67861
509	0	11344.6	12823.2			0.291188	3.43421
510	0	11416.5	12788.1			0.271499	3.68325
511	0	11488.4	12753.1			0.294304	3.39785
512	0	11560.3	12718			0.328636	3.04288
513	0	11632.2	12682.9			0.315326	3.17132
514	0	11704.1	12647.9			0.279512	3.57766
515	0	11776.1	12612.8			0.315451	3.17007
516	0	11848	12577.7			0.290313	3.44456
517	0	11919.9	12542.6			0.29488	3.39121
518	0	11991.8	12507.6			0.301626	3.31536
519	0	12063.7	12472.5			0.271699	3.68055
520	0	12135.6	12437.4			0.298463	3.3505
521	0	12207.5	12402.4			0.297719	3.35888
522	0	12279.4	12367.3			0.265408	3.76778
523	0	12351.3	12332.2			0.310729	3.21823
524	0	12423.2	12297.2			0.295502	3.38407
525	0	12495.1	12262.1			0.263401	3.79649
526	0	12567	12227			0.265563	3.76559
527	0	12638.9	12191.9			0.293639	3.40554
528	0	12710.8	12156.9			0.223192	4.48045
529	0	12782.7	12121.8			0.256268	3.90217
530	0	12854.6	12086.7			0.246247	4.06096
531	0	12926.5	12051.7			0.273839	3.65178
532	0	12998.4	12016.6			0.240985	4.14964
533	0	13070.3	11981.5			0.276128	3.6215
534	0	13142.2	11946.5			0.263672	3.79259
535	0	13214.1	11911.4			0.156102	6.40608
536	0	13286	11876.3			0.280967	3.55914
537	0	13357.9	11841.2			0.299061	3.3438
538	0	7930.1	14399.6			0.410838	2.43405
539	0	8002	14364.5			0.275257	3.63296
540	0	8073.9	14329.4			0.345071	2.89795
541	0	8145.81	14294.4			0.292142	3.42299
542	0	8217.71	14259.3			0.286329	3.49249
543	0	8289.61	14224.2			0.307732	3.24958
544	0	8361.52	14189.2			0.301187	3.3202
545	0	8433.42	14154.1			0.313601	3.18876
546	0	8505.32	14119			0.3143	3.18168
547	0	8577.23	14083.9			0.31445	3.18016
548	0	8649.13	14048.9			0.298186	3.35361
549	0	8721.03	14013.8			0.318381	3.14089
550	0	8792.94	13978.7			0.321084	3.11445
551	0	8864.84	13943.7			0.324306	3.0835
552	0	8936.75	13908.6			0.326145	3.06612
553	0	9008.65	13873.5			0.321746	3.10804
554	0	9080.55	13838.5			0.315199	3.1726
555	0	9152.46	13803.4			0.320919	3.11606
556	0	9224.36	13768.3			0.32584	3.06899
557	0	9296.26	13733.2			0.318309	3.1416
558	0	9368.17	13698.2			0.278277	3.59355
559	0	9440.07	13663.1			0.327578	3.05271
560	0	9511.97	13628			0.337333	2.96443
561	0	9583.88	13593			0.356458	2.80538
562	0	9655.78	13557.9			0.289265	3.45703
563	0	9727.68	13522.8			0.310613	3.21944
564	0	9799.59	13487.8			0.314734	3.17729
565	0	9871.49	13452.7			0.273585	3.65517
566	0	9943.39	13417.6			0.274858	3.63825
567	0	10015.3	13382.6			0.295075	3.38897
568	0	10087.2	13347.5			0.26529	3.76946
569	0	10159.1	13312.4			0.269707	3.70772
570	0	10231	13277.3			0.25656	3.89772
571	0	10302.9	13242.3			0.288749	3.46321
572	0	10374.8	13207.2			0.279893	3.5728
573	0	10446.7	13172.1			0.270421	3.69794
574	0	10518.6	13137.1			0.27143	3.68419
575	0	10590.5	13102			0.288782	3.46281
576	0	10662.4	13066.9			0.271915	3.67761
577	0	10734.3	13031.9			0.277757	3.60028
578	0	10806.2	12996.8			0.324846	3.07839
579	0	10878.1	12961.7			0.306887	3.25853
580	0	10950	12926.6			0.331629	3.01542
581	0	11021.9	12891.6			0.298533	3.34971
582	0	11093.9	12856.5			0.338698	2.95248
583	0	11165.8	12821.4			0.303532	3.29454
584	0	11237.7	12786.4			0.30939	3.23217
585	0	11309.6	12751.3			0.275413	3.63091
586	0	11381.5	12716.2			0.322916	3.09678
587	0	11453.4	12681.2			0.324833	3.07851
588	0	11525.3	12646.1			0.316497	3.15958
589	0	11597.2	12611			0.295692	3.3819
590	0	11669.1	12575.9			0.312211	3.20296
591	0	11741	12540.9			0.29206	3.42396
592	0	11812.9	12505.8			0.289598	3.45306
593	0	11884.8	12470.7			0.285409	3.50375
594	0	11956.7	12435.7			0.293312	3.40934
595	0	12028.6	12400.6			0.254744	3.9255
596	0	12100.5	12365.5			0.247897	4.03394
597	0	12172.4	12330.5			0.259057	3.86015
598	0	12244.3	12295.4			0.261004	3.83136
599	0	12316.2	12260.3			0.278247	3.59393
600	0	12388.1	12225.3			0.273112	3.6615
601	0	12460	12190.2			0.261133	3.82947
602	0	12531.9	12155.1			0.289155	3.45836
603	0	12603.8	12120			0.309833	3.22754
604	0	12675.7	12085			0.26206	3.81591
605	0	12747.6	12049.9			0.279379	3.57936
606	0	12819.5	12014.8			0.262644	3.80744
607	0	12891.4	11979.8			0.254382	3.9311
608	0	12963.3	11944.7			0.267631	3.73649
609	0	13035.2	11909.6			0.251384	3.97798
610	0	13107.1	11874.6			0.248834	4.01875
611	0	13179.1	11839.5			0.251074	3.98289
612	0	13251	11804.4			0.245837	4.06774
613	0	13322.9	11769.3			0.300378	3.32914
614	0	13394.8	11734.3			0.158121	6.32425
615	0	7751.22	14397.8			0.339473	2.94574
616	0	7823.12	14362.7			0.293746	3.40431
617	0	7895.03	14327.7			0.338053	2.95811
618	0	7966.93	14292.6			0.309367	3.23241
619	0	8038.83	14257.5			0.276609	3.61521
620	0	8110.74	14222.5			0.268875	3.7192
621	0	8182.64	14187.4			0.345973	2.8904
622	0	8254.54	14152.3			0.289839	3.45019
623	0	8326.45	14117.2			0.319804	3.12692
624	0	8398.35	14082.2			0.315072	3.17388
625	0	8470.25	14047.1			0.315346	3.17112
626	0	8542.16	14012			0.322094	3.10468
627	0	8614.06	13977			0.305358	3.27485
628	0	8685.96	13941.9			0.324953	3.07737
629	0	8757.87	13906.8			0.302483	3.30597
630	0	8829.77	13871.8			0.360935	2.77058
631	0	8901.68	13836.7			0.337785	2.96047
632	0	8973.58	13801.6			0.330671	3.02415
633	0	9045.48	13766.6			0.351793	2.84258
634	0	9117.39	13731.5			0.318484	3.13987
635	0	9189.29	13696.4			0.312436	3.20066
636	0	9261.19	13661.3			0.341239	2.9305
637	0	9333.1	13626.3			0.313268	3.19215
638	0	9405	13591.2			0.297087	3.36602
639	0	9476.9	13556.1			0.302069	3.3105
640	0	9548.81	13521.1			0.333035	3.00269
641	0	9620.71	13486			0.329519	3.03473
642	0	9692.61	13450.9			0.292304	3.4211
643	0	9764.52	13415.9			0.316645	3.15811
644	0	9836.42	13380.8			0.316948	3.15509
645	0	9908.32	13345.7			0.316813	3.15644
646	0	9980.23	13310.6			0.316931	3.15526
647	0	10052.1	13275.6			0.273436	3.65717
648	0	10124	13240.5			0.264961	3.77414
649	0	10195.9	13205.4			0.272841	3.66514
650	0	10267.8	13170.4			0.268989	3.71762
651	0	10339.7	13135.3			0.274421	3.64404
652	0	10411.6	13100.2			0.291916	3.42564
653	0	10483.6	13065.2			0.30524	3.27612
654	0	10555.5	13030.1			0.278735	3.58764
655	0	10627.4	12995			0.342017	2.92383
656	0	10699.3	12959.9			0.341855	2.92522
657	0	10771.2	12924.9			0.272057	3.6757
658	0	10843.1	12889.8			0.328532	3.04384
659	0	10915	12854.7			0.327017	3.05795
660	0	10986.9	12819.7			0.316269	3.16186
661	0	11058.8	12784.6			0.337155	2.966
662	0	11130.7	12749.5			0.354144	2.82371
663	0	11202.6	12714.5			0.349489	2.86132
664	0	11274.5	12679.4			0.364054	2.74684
665	0	11346.4	12644.3			0.329523	3.03469
666	0	11418.3	12609.3			0.314262	3.18206
667	0	11490.2	12574.2			0.336998	2.96738
668	0	11562.1	12539.1			0.3491	2.86451
669	0	11634	12504			0.294608	3.39434
670	0	11705.9	12469			0.275788	3.62597
671	0	11777.8	12433.9			0.307401	3.25308
672	0	11849.7	12398.8			0.326734	3.0606
673	0	11921.6	12363.8			0.2956	3.38295
674	0	11993.5	12328.7			0.297937	3.35642
675	0	12065.4	12293.6			0.294263	3.39832
676	0	12137.3	12258.6			0.276957	3.61067
677	0	12209.2	12223.5			0.28298	3.53382
678	0	12281.1	12188.4			0.303574	3.29409
679	0	12353	12153.3			0.281084	3.55765
680	0	12424.9	12118.3			0.313157	3.19329
681	0	12496.9	12083.2			0.272582	3.66862
682	0	12568.8	12048.1			0.290544	3.44182
683	0	12640.7	12013.1			0.249203	4.0128
684	0	12712.6	11978			0.227998	4.386
685	0	12784.5	11942.9			0.265665	3.76413
686	0	12856.4	11907.9			0.242404	4.12535
687	0	12928.3	11872.8			0.260899	3.8329
688	0	13000.2	11837.7			0.276	3.62319
689	0	13072.1	11802.7			0.249257	4.01192
690	0	13144	11767.6			0.212584	4.70403
691	0	13215.9	11732.5			0.248757	4.01998
692	0	13287.8	11697.4			0.28953	3.45388
693	0	13359.7	11662.4			0.230485	4.33868
694	0	13431.6	11627.3			0.250781	3.98755
695	0	13503.5	11592.2			0.258646	3.86629
696	0	7644.25	14361			0.359928	2.77834
697	0	7716.15	14325.9			0.244843	4.08425
698	0	7788.05	14290.8			0.268734	3.72115
699	0	7859.96	14255.8			0.311483	3.21045
700	0	7931.86	14220.7			0.362234	2.76065
701	0	8003.76	14185.6			0.258584	3.86721
702	0	8075.67	14150.6			0.318001	3.14464
703	0	8147.57	14115.5			0.320818	3.11703
704	0	8219.47	14080.4			0.281494	3.55247
705	0	8291.38	14045.3			0.284249	3.51805
706	0	8363.28	14010.3			0.305385	3.27456
707	0	8435.18	13975.2			0.28277	3.53645
708	0	8507.09	13940.1			0.302501	3.30578
709	0	8578.99	13905.1			0.30362	3.29359
710	0	8650.9	13870			0.339422	2.94619
711	0	8722.8	13834.9			0.331293	3.01847
712	0	8794.7	13799.9			0.360474	2.77412
713	0	8866.61	13764.8			0.345795	2.89189
714	0	8938.51	13729.7			0.351877	2.8419
715	0	9010.41	13694.6			0.324686	3.0799
716	0	9082.32	13659.6			0.338611	2.95324
717	0	9154.22	13624.5			0.343497	2.91123
718	0	9226.12	13589.4			0.318409	3.14062
719	0	9298.03	13554.4			0.3604	2.7747
720	0	9369.93	13519.3			0.324766	3.07914
721	0	9441.83	13484.2			0.374952	2.66701
722	0	9513.74	13449.2			0.316069	3.16387
723	0	9585.64	13414.1			0.362317	2.76002
724	0	9657.54	13379			0.322571	3.1001
725	0	9729.45	13344			0.339226	2.94789
726	0	9801.35	13308.9			0.350914	2.8497
727	0	9873.26	13273.8			0.32803	3.0485
728	0	9945.16	13238.7			0.3355	2.98062
729	0	10017.1	13203.7			0.289157	3.45832
730	0	10089	13168.6			0.279101	3.58293
731	0	10160.9	13133.5			0.28623	3.49369
732	0	10232.8	13098.5			0.248516	4.02389
733	0	10304.7	13063.4			0.339927	2.94181
734	0	10376.6	13028.3			0.288061	3.47148
735	0	10448.5	12993.3			0.263522	3.79475
736	0	10520.4	12958.2			0.319693	3.128
737	0	10592.3	12923.1			0.293116	3.41162
738	0	10664.2	12888			0.336589	2.97098
739	0	10736.1	12853			0.293868	3.40288
740	0	10808	12817.9			0.288839	3.46214
741	0	10879.9	12782.8			0.318971	3.13508
742	0	10951.8	12747.8			0.360369	2.77494
743	0	11023.7	12712.7			0.301092	3.32125
744	0	11095.6	12677.6			0.412886	2.42198
745	0	11167.5	12642.6			0.272798	3.66572
746	0	11239.4	12607.5			0.417891	2.39297
747	0	11311.3	12572.4			0.304804	3.28079
748	0	11383.2	12537.3			0.297621	3.35998
749	0	11455.1	12502.3			0.326884	3.05919
750	0	11527	12467.2			0.340102	2.94029
751	0	11598.9	12432.1			0.31945	3.13038
752	0	11670.8	12397.1			0.299261	3.34156
753	0	11742.7	12362			0.337593	2.96214
754	0	11814.7	12326.9			0.293593	3.40608
755	0	11886.6	12291.9			0.302577	3.30494
756	0	11958.5	12256.8			0.274564	3.64214
757	0	12030.4	12221.7			0.313734	3.18741
758	0	12102.3	12186.7			0.285726	3.49985
759	0	12174.2	12151.6			0.277108	3.6087
760	0	12246.1	12116.5			0.279315	3.58018
761	0	12318	12081.4			0.262383	3.81123
762	0	12389.9	12046.4			0.281128	3.55709
763	0	12461.8	12011.3			0.290723	3.4397
764	0	12533.7	11976.2			0.273871	3.65135
765	0	12605.6	11941.2			0.260326	3.84133
766	0	12677.5	11906.1			0.254159	3.93454
767	0	12749.4	11871			0.272516	3.66951
768	0	12821.3	11836			0.240123	4.16453
769	0	12893.2	11800.9			0.240022	4.16628
770	0	12965.1	11765.8			0.24651	4.05663
771	0	13037	11730.7			0.235287	4.25012
772	0	13108.9	11695.7			0.217783	4.59173
773	0	13180.8	11660.6			0.26245	3.81026
774	0	13252.7	11625.5			0.243734	4.10283
775	0	13324.6	11590.5			0.253324	3.94751
776	0	13396.5	11555.4			0.237121	4.21725
777	0	13468.4	11520.3			0.255867	3.90827
778	0	13540.3	11485.3			0.283967	3.52153
779	0	13612.2	11450.2			0.00768657	130.097
780	0	7609.18	14289.1			0.2533	3.94788
781	0	7681.08	14254			0.245621	4.07132
782	0	7752.98	14218.9			0.313231	3.19253
783	0	7824.89	14183.9			0.286776	3.48704
784	0	7896.79	14148.8			0.258808	3.86386
785	0	7968.69	14113.7			0.284635	3.51327
786	0	8040.6	14078.7			0.280704	3.56247
787	0	8112.5	14043.6			0.283704	3.52481
788	0	8184.4	14008.5			0.316872	3.15585
789	0	8256.31	13973.4			0.307912	3.24768
790	0	8328.21	13938.4			0.349586	2.86053
791	0	8400.11	13903.3			0.315165	3.17294
792	0	8472.02	13868.2			0.311501	3.21026
793	0	8543.92	13833.2			0.340785	2.9344
794	0	8615.83	13798.1			0.308003	3.24673
795	0	8687.73	13763			0.356587	2.80437
796	0	8759.63	13728			0.388998	2.57071
797	0	8831.54	13692.9			0.327588	3.05261
798	0	8903.44	13657.8			0.349838	2.85847
799	0	8975.34	13622.7			0.332348	3.00889
800	0	9047.25	13587.7			0.388423	2.57451
801	0	9119.15	13552.6			0.365096	2.73901
802	0	9191.05	13517.5			0.36588	2.73314
803	0	9262.96	13482.5			0.347629	2.87663
804	0	9334.86	13447.4			0.368905	2.71073
805	0	9406.76	13412.3			0.333117	3.00194
806	0	9478.67	13377.3			0.375697	2.66172
807	0	9550.57	13342.2			0.335721	2.97866
808	0	9622.47	13307.1			0.365253	2.73783
809	0	9694.38	13272			0.330517	3.02556
810	0	9766.28	13237			0.320915	3.11609
811	0	9838.19	13201.9			0.304772	3.28114
812	0	9910.09	13166.8			0.328957	3.03991
813	0	9981.99	13131.8			0.214628	4.65923
814	0	10053.9	13096.7			0.305631	3.27192
815	0	10125.8	13061.6			0.37911	2.63776
816	0	10197.7	13026.6			0.326709	3.06082
817	0	10269.6	12991.5			0.267463	3.73884
818	0	10341.5	12956.4			0.312333	3.20171
819	0	10413.4	12921.4			0.299659	3.33713
820	0	10485.3	12886.3			0.279559	3.57707
821	0	10557.2	12851.2			0.271158	3.68789
822	0	10629.1	12816.1			0.2754	3.63108
823	0	10701	12781.1			0.24637	4.05893
824	0	10772.9	12746			0.307567	3.25132
825	0	10844.8	12710.9			0.355171	2.81555
826	0	10916.7	12675.9			0.318837	3.1364
827	0	10988.6	12640.8			0.369804	2.70413
828	0	11060.5	12605.7			0.310068	3.2251
829	0	11132.4	12570.7			0.295168	3.3879
830	0	11204.4	12535.6			0.262014	3.81659
831	0	11276.3	12500.5			0.306595	3.26164
832	0	11348.2	12465.4			0.324774	3.07907
833	0	11420.1	12430.4			0.383881	2.60498
834	0	11492	12395.3			0.342406	2.92051
835	0	11563.9	12360.2			0.368268	2.71542
836	0	11635.8	12325.2			0.368841	2.7112
837	0	11707.7	12290.1			0.316994	3.15463
838	0	11779.6	12255			0.341503	2.92823
839	0	11851.5	12220			0.36049	2.774
840	0	11923.4	12184.9			0.284514	3.51476
841	0	11995.3	12149.8			0.301766	3.31383
842	0	12067.2	12114.7			0.319705	3.12788
843	0	12139.1	12079.7			0.315803	3.16653
844	0	12211	12044.6			0.293111	3.41168
845	0	12282.9	12009.5			0.315857	3.16599
846	0	12354.8	11974.5			0.278696	3.58814
847	0	12426.7	11939.4			0.315498	3.16959
848	0	12498.6	11904.3			0.292445	3.41944
849	0	12570.5	11869.3			0.288395	3.46747
850	0	12642.4	11834.2			0.281376	3.55396
851	0	12714.3	11799.1			0.251983	3.96853
852	0	12786.2	11764.1			0.238155	4.19894
853	0	12858.1	11729			0.253576	3.94359
854	0	12930	11693.9			0.242903	4.11687
855	0	13001.9	11658.8			0.237176	4.21627
856	0	13073.8	11623.8			0.231863	4.31288
857	0	13145.7	11588.7			0.225981	4.42515
858	0	13217.7	11553.6			0.214029	4.67226
859	0	13289.6	11518.6			0.260022	3.84583
860	0	13361.5	11483.5			0.220532	4.53449
861	0	13433.4	11448.4			0.249841	4.00255
862	0	13505.3	11413.4			0.293218	3.41043
863	0	13577.2	11378.3			0.277768	3.60012
864	0	13649.1	11343.2			0.205669	4.86218
865	0	7502.2	14252.2			0.209133	4.78164
866	0	7574.11	14217.2			0.273628	3.65459
867	0	7646.01	14182.1			0.258245	3.8723
868	0	7717.91	14147			0.27528	3.63267
869	0	7789.82	14112			0.284603	3.51367
870	0	7861.72	14076.9			0.288251	3.4692
871	0	7933.62	14041.8			0.301156	3.32053
872	0	8005.53	14006.7			0.304307	3.28615
873	0	8077.43	13971.7			0.278323	3.59295
874	0	8149.33	13936.6			0.303698	3.29275
875	0	8221.24	13901.5			0.336248	2.97399
876	0	8293.14	13866.5			0.300983	3.32245
877	0	8365.05	13831.4			0.323269	3.0934
878	0	8436.95	13796.3			0.319365	3.13121
879	0	8508.85	13761.3			0.369175	2.70874
880	0	8580.76	13726.2			0.338439	2.95474
881	0	8652.66	13691.1			0.329575	3.03421
882	0	8724.56	13656.1			0.361608	2.76543
883	0	8796.47	13621			0.343024	2.91525
884	0	8868.37	13585.9			0.362011	2.76235
885	0	8940.27	13550.8			0.317792	3.14671
886	0	9012.18	13515.8			0.367992	2.71745
887	0	9084.08	13480.7			0.345919	2.89085
888	0	9155.98	13445.6			0.367131	2.72382
889	0	9227.89	13410.6			0.347693	2.8761
890	0	9299.79	13375.5			0.341473	2.92849
891	0	9371.69	13340.4			0.328613	3.0431
892	0	9443.6	13305.4			0.364286	2.7451
893	0	9515.5	13270.3			0.31744	3.1502
894	0	9587.41	13235.2			0.371296	2.69327
895	0	9659.31	13200.1			0.349353	2.86244
896	0	9731.21	13165.1			0.343972	2.90721
897	0	9803.12	13130			0.424511	2.35565
898	0	9875.02	13094.9			0.311619	3.20905
899	0	9946.92	13059.9			0.328799	3.04137
900	0	10018.8	13024.8			0.311947	3.20567
901	0	10090.7	12989.7			0.26889	3.71899
902	0	10162.6	12954.7			0.32879	3.04146
903	0	10234.5	12919.6			0.284146	3.51932
904	0	10306.4	12884.5			0.24369	4.10357
905	0	10378.3	12849.4			0.267722	3.73522
906	0	10450.2	12814.4			0.290981	3.43666
907	0	10522.2	12779.3			0.304066	3.28876
908	0	10594.1	12744.2			0.266937	3.74621
909	0	10666	12709.2			0.33803	2.95832
910	0	10737.9	12674.1			0.356035	2.80871
911	0	10809.8	12639			0.29461	3.39432
912	0	10881.7	12604			0.336687	2.97012
913	0	10953.6	12568.9			0.311355	3.21176
914	0	11025.5	12533.8			0.302428	3.30658
915	0	11097.4	12498.8			0.295717	3.38161
916	0	11169.3	12463.7			0.314836	3.17625
917	0	11241.2	12428.6			0.330155	3.02888
918	0	11313.1	12393.5			0.358261	2.79126
919	0	11385	12358.5			0.371218	2.69384
920	0	11456.9	12323.4			0.379115	2.63772
921	0	11528.8	12288.3			0.348182	2.87206
922	0	11600.7	12253.3			0.35281	2.83439
923	0	11672.6	12218.2			0.306528	3.26235
924	0	11744.5	12183.1			0.355994	2.80903
925	0	11816.4	12148.1			0.306496	3.26269
926	0	11888.3	12113			0.31283	3.19663
927	0	11960.2	12077.9			0.340126	2.94008
928	0	12032.1	12042.8			0.339178	2.9483
929	0	12104	12007.8			0.302605	3.30464
930	0	12175.9	11972.7			0.300223	3.33086
931	0	12247.8	11937.6			0.2931	3.4118
932	0	12319.7	11902.6			0.283652	3.52545
933	0	12391.6	11867.5			0.283113	3.53216
934	0	12463.5	11832.4			0.25382	3.93981
935	0	12535.4	11797.4			0.29206	3.42395
936	0	12607.4	11762.3			0.256699	3.89561
937	0	12679.3	11727.2			0.259428	3.85464
938	0	12751.2	11692.1			0.228668	4.37316
939	0	12823.1	11657.1			0.28476	3.51174
940	0	12895	11622			0.259682	3.85087
941	0	12966.9	11586.9			0.248958	4.01675
942	0	13038.8	11551.9			0.232616	4.29894
943	0	13110.7	11516.8			0.291996	3.4247
944	0	13182.6	11481.7			0.316347	3.16108
945	0	13254.5	11446.7			0.257659	3.88109
946	0	13326.4	11411.6			0.228502	4.37633
947	0	13398.3	11376.5			0.266948	3.74605
948	0	13470.2	11341.5			0.304146	3.28789
949	0	13542.1	11306.4			0.223633	4.47161
950	0	13614	11271.3			0.261172	3.82889
951	0	13685.9	11236.2			0.267299	3.74114
952	0	13757.8	11201.2			0.25856	3.86758
953	0	7395.23	14215.4			0.300688	3.3257
954	0	7467.13	14180.3			0.27609	3.62201
955	0	7539.04	14145.3			0.258956	3.86167
956	0	7610.94	14110.2			0.275398	3.63111
957	0	7682.84	14075.1			0.269764	3.70695
958	0	7754.75	14040.1			0.252293	3.96365
959	0	7826.65	14005			0.281359	3.55418
960	0	7898.55	13969.9			0.276767	3.61315
961	0	7970.46	13934.8			0.311931	3.20584
962	0	8042.36	13899.8			0.319799	3.12696
963	0	8114.26	13864.7			0.323101	3.09501
964	0	8186.17	13829.6			0.339832	2.94263
965	0	8258.07	13794.6			0.32222	3.10347
966	0	8329.98	13759.5			0.300642	3.32622
967	0	8401.88	13724.4			0.314221	3.18247
968	0	8473.78	13689.4			0.334586	2.98877
969	0	8545.69	13654.3			0.333622	2.9974
970	0	8617.59	13619.2			0.352082	2.84024
971	0	8689.49	13584.1			0.340284	2.93872
972	0	8761.4	13549.1			0.337153	2.96601
973	0	8833.3	13514			0.344742	2.90072
974	0	8905.2	13478.9			0.384412	2.60138
975	0	8977.11	13443.9			0.341844	2.92531
976	0	9049.01	13408.8			0.36659	2.72784
977	0	9120.91	13373.7			0.356284	2.80675
978	0	9192.82	13338.7			0.378618	2.64118
979	0	9264.72	13303.6			0.365367	2.73698
980	0	9336.62	13268.5			0.343447	2.91166
981	0	9408.53	13233.5			0.333148	3.00167
982	0	9480.43	13198.4			0.356229	2.80718
983	0	9552.34	13163.3			0.391773	2.5525
984	0	9624.24	13128.2			0.335289	2.9825
985	0	9696.14	13093.2			0.351072	2.84842
986	0	9768.05	13058.1			0.349762	2.85909
987	0	9839.95	13023			0.308404	3.2425
988	0	9911.85	12988			0.265054	3.77282
989	0	9983.76	12952.9			0.25483	3.92418
990	0	10055.7	12917.8			0.261737	3.82064
991	0	10127.6	12882.8			0.310305	3.22263
992	0	10199.5	12847.7			0.289548	3.45366
993	0	10271.4	12812.6			0.284806	3.51116
994	0	10343.3	12777.5			0.294459	3.39605
995	0	10415.2	12742.5			0.249873	4.00203
996	0	10487.1	12707.4			0.260412	3.84007
997	0	10559	12672.3			0.251632	3.97406
998	0	10630.9	12637.3			0.285372	3.5042
999	0	10702.8	12602.2			0.315464	3.16994
1000	0	10774.7	12567.1			0.30356	3.29424
1001	0	10846.6	12532.1			0.262727	3.80624
1002	0	10918.5	12497			0.32437	3.0829
1003	0	10990.4	12461.9			0.286789	3.48688
1004	0	11062.3	12426.8			0.313808	3.18666
1005	0	11134.2	12391.8			0.306739	3.2601
1006	0	11206.1	12356.7			0.374596	2.66954
1007	0	11278	12321.6			0.394998	2.53166
1008	0	11349.9	12286.6			0.327668	3.05187
1009	0	11421.8	12251.5			0.364181	2.74588
1010	0	11493.7	12216.4			0.320573	3.11942
1011	0	11565.6	12181.4			0.377195	2.65115
1012	0	11637.5	12146.3			0.354553	2.82046
1013	0	11709.4	12111.2			0.308419	3.24234
1014	0	11781.3	12076.2			0.34496	2.89889
1015	0	11853.2	12041.1			0.312321	3.20184
1016	0	11925.2	12006			0.318215	3.14253
1017	0	11997.1	11970.9			0.293005	3.41291
1018	0	12069	11935.9			0.357743	2.7953
1019	0	12140.9	11900.8			0.302947	3.30091
1020	0	12212.8	11865.7			0.299065	3.34375
1021	0	12284.7	11830.7			0.296679	3.37064
1022	0	12356.6	11795.6			0.280374	3.56667
1023	0	12428.5	11760.5			0.266296	3.75521
1024	0	12500.4	11725.5			0.285422	3.50359
1025	0	12572.3	11690.4			0.308866	3.23765
1026	0	12644.2	11655.3			0.26213	3.8149
1027	0	12716.1	11620.2			0.272223	3.67346
1028	0	12788	11585.2			0.256144	3.90405
1029	0	12859.9	11550.1			0.281877	3.54765
1030	0	12931.8	11515			0.251357	3.97841
1031	0	13003.7	11480			0.256342	3.90103
1032	0	13075.6	11444.9			0.247805	4.03543
1033	0	13147.5	11409.8			0.301111	3.32104
1034	0	13219.4	11374.8			0.297293	3.36369
1035	0	13291.3	11339.7			0.266943	3.74611
1036	0	13363.2	11304.6			0.2339	4.27534
1037	0	13435.1	11269.5			0.244559	4.089
1038	0	13507	11234.5			0.291058	3.43574
1039	0	13578.9	11199.4			0.19909	5.02285
1040	0	13650.8	11164.3			0.231583	4.31812
1041	0	13722.7	11129.3			0.32302	3.09579
1042	0	13794.6	11094.2			0.337485	2.96309
1043	0	7288.26	14178.6			0.272407	3.67097
1044	0	7360.16	14143.5			0.299252	3.34167
1045	0	7432.06	14108.4			0.277967	3.59755
1046	0	7503.97	14073.4			0.286762	3.48721
1047	0	7575.87	14038.3			0.263419	3.79624
1048	0	7647.77	14003.2			0.278391	3.59206
1049	0	7719.68	13968.2			0.239539	4.17469
1050	0	7791.58	13933.1			0.285383	3.50406
1051	0	7863.48	13898			0.263366	3.797
1052	0	7935.39	13862.9			0.298926	3.34531
1053	0	8007.29	13827.9			0.287177	3.48217
1054	0	8079.2	13792.8			0.286158	3.49457
1055	0	8151.1	13757.7			0.304805	3.28079
1056	0	8223	13722.7			0.302091	3.31026
1057	0	8294.91	13687.6			0.343775	2.90888
1058	0	8366.81	13652.5			0.310999	3.21544
1059	0	8438.71	13617.5			0.372512	2.68448
1060	0	8510.62	13582.4			0.319249	3.13235
1061	0	8582.52	13547.3			0.316263	3.16193
1062	0	8654.42	13512.2			0.306706	3.26045
1063	0	8726.33	13477.2			0.357687	2.79574
1064	0	8798.23	13442.1			0.334284	2.99147
1065	0	8870.13	13407			0.395911	2.52582
1066	0	8942.04	13372			0.364742	2.74166
1067	0	9013.94	13336.9			0.36355	2.75065
1068	0	9085.84	13301.8			0.362221	2.76075
1069	0	9157.75	13266.8			0.384144	2.60319
1070	0	9229.65	13231.7			0.316091	3.16364
1071	0	9301.56	13196.6			0.36019	2.77631
1072	0	9373.46	13161.5			0.39322	2.5431
1073	0	9445.36	13126.5			0.329309	3.03666
1074	0	9517.27	13091.4			0.342905	2.91626
1075	0	9589.17	13056.3			0.324945	3.07745
1076	0	9661.07	13021.3			0.28571	3.50005
1077	0	9732.98	12986.2			0.337474	2.96319
1078	0	9804.88	12951.1			0.294796	3.39218
1079	0	9876.78	12916.1			0.281031	3.55832
1080	0	9948.69	12881			0.273352	3.65829
1081	0	10020.6	12845.9			0.315099	3.1736
1082	0	10092.5	12810.9			0.326699	3.06092
1083	0	10164.4	12775.8			0.283727	3.52451
1084	0	10236.3	12740.7			0.25409	3.93561
1085	0	10308.2	12705.6			0.296693	3.37048
1086	0	10380.1	12670.6			0.281917	3.54714
1087	0	10452	12635.5			0.254942	3.92246
1088	0	10523.9	12600.4			0.30399	3.28959
1089	0	10595.8	12565.4			0.282879	3.53508
1090	0	10667.7	12530.3			0.284775	3.51154
1091	0	10739.6	12495.2			0.293493	3.40724
1092	0	10811.5	12460.2			0.288206	3.46974
1093	0	10883.4	12425.1			0.327331	3.05501
1094	0	10955.3	12390			0.315659	3.16798
1095	0	11027.2	12354.9			0.364961	2.74002
1096	0	11099.1	12319.9			0.330563	3.02514
1097	0	11171	12284.8			0.34129	2.93006
1098	0	11243	12249.7			0.309597	3.23
1099	0	11314.9	12214.7			0.320975	3.1155
1100	0	11386.8	12179.6			0.40113	2.49296
1101	0	11458.7	12144.5			0.336247	2.974
1102	0	11530.6	12109.5			0.409737	2.44059
1103	0	11602.5	12074.4			0.350897	2.84984
1104	0	11674.4	12039.3			0.336292	2.9736
1105	0	11746.3	12004.2			0.31802	3.14446
1106	0	11818.2	11969.2			0.336706	2.96995
1107	0	11890.1	11934.1			0.367227	2.72311
1108	0	11962	11899			0.338939	2.95038
1109	0	12033.9	11864			0.27455	3.64232
1110	0	12105.8	11828.9			0.327165	3.05656
1111	0	12177.7	11793.8			0.302402	3.30685
1112	0	12249.6	11758.8			0.291679	3.42843
1113	0	12321.5	11723.7			0.29199	3.42477
1114	0	12393.4	11688.6			0.258909	3.86236
1115	0	12465.3	11653.6			0.304929	3.27945
1116	0	12537.2	11618.5			0.273123	3.66135
1117	0	12609.1	11583.4			0.300444	3.32841
1118	0	12681	11548.3			0.289571	3.45339
1119	0	12752.9	11513.3			0.309095	3.23525
1120	0	12824.8	11478.2			0.273571	3.65536
1121	0	12896.7	11443.1			0.260736	3.83529
1122	0	12968.6	11408.1			0.243423	4.10808
1123	0	13040.5	11373			0.213213	4.69015
1124	0	13112.4	11337.9			0.290075	3.44738
1125	0	13184.3	11302.9			0.237914	4.20319
1126	0	13256.2	11267.8			0.274503	3.64295
1127	0	13328.2	11232.7			0.261033	3.83093
1128	0	13400.1	11197.6			0.24099	4.14956
1129	0	13472	11162.6			0.220333	4.53858
1130	0	13543.9	11127.5			0.264149	3.78575
1131	0	13615.8	11092.4			0.254388	3.931
1132	0	13687.7	11057.4			0.341148	2.93128
1133	0	13759.6	11022.3			0.201016	4.97473
1134	0	7181.28	14141.7			0.24624	4.06107
1135	0	7253.19	14106.7			0.229768	4.35222
1136	0	7325.09	14071.6			0.285172	3.50665
1137	0	7396.99	14036.5			0.346002	2.89016
1138	0	7468.9	14001.5			0.299171	3.34258
1139	0	7540.8	13966.4			0.267594	3.737
1140	0	7612.7	13931.3			0.28835	3.46801
1141	0	7684.61	13896.2			0.268356	3.72639
1142	0	7756.51	13861.2			0.287589	3.47718
1143	0	7828.41	13826.1			0.297001	3.367
1144	0	7900.32	13791			0.290149	3.44651
1145	0	7972.22	13756			0.279006	3.58416
1146	0	8044.13	13720.9			0.292459	3.41929
1147	0	8116.03	13685.8			0.303521	3.29466
1148	0	8187.93	13650.8			0.340112	2.9402
1149	0	8259.84	13615.7			0.324623	3.0805
1150	0	8331.74	13580.6			0.327508	3.05336
1151	0	8403.64	13545.5			0.351142	2.84785
1152	0	8475.55	13510.5			0.343571	2.91061
1153	0	8547.45	13475.4			0.396275	2.5235
1154	0	8619.35	13440.3			0.398843	2.50725
1155	0	8691.26	13405.3			0.341525	2.92804
1156	0	8763.16	13370.2			0.355106	2.81606
1157	0	8835.06	13335.1			0.374464	2.67049
1158	0	8906.97	13300.1			0.397399	2.51636
1159	0	8978.87	13265			0.37951	2.63497
1160	0	9050.77	13229.9			0.396348	2.52303
1161	0	9122.68	13194.9			0.404421	2.47267
1162	0	9194.58	13159.8			0.341322	2.92979
1163	0	9266.49	13124.7			0.370033	2.70246
1164	0	9338.39	13089.6			0.374882	2.66751
1165	0	9410.29	13054.6			0.39241	2.54836
1166	0	9482.2	13019.5			0.380186	2.63029
1167	0	9554.1	12984.4			0.347493	2.87776
1168	0	9626	12949.4			0.363961	2.74755
1169	0	9697.91	12914.3			0.318256	3.14213
1170	0	9769.81	12879.2			0.246381	4.05875
1171	0	9841.71	12844.2			0.324055	3.0859
1172	0	9913.62	12809.1			0.260419	3.83997
1173	0	9985.52	12774			0.288225	3.46951
1174	0	10057.4	12738.9			0.286135	3.49485
1175	0	10129.3	12703.9			0.276905	3.61135
1176	0	10201.2	12668.8			0.275533	3.62933
1177	0	10273.1	12633.7			0.276817	3.6125
1178	0	10345	12598.7			0.311072	3.21469
1179	0	10416.9	12563.6			0.264528	3.78032
1180	0	10488.8	12528.5			0.259536	3.85303
1181	0	10560.7	12493.5			0.271601	3.68187
1182	0	10632.7	12458.4			0.274071	3.64869
1183	0	10704.6	12423.3			0.353734	2.82698
1184	0	10776.5	12388.3			0.319656	3.12836
1185	0	10848.4	12353.2			0.328495	3.04419
1186	0	10920.3	12318.1			0.292731	3.4161
1187	0	10992.2	12283			0.260433	3.83976
1188	0	11064.1	12248			0.321929	3.10628
1189	0	11136	12212.9			0.2707	3.69413
1190	0	11207.9	12177.8			0.403898	2.47587
1191	0	11279.8	12142.8			0.445674	2.24379
1192	0	11351.7	12107.7			0.375843	2.66068
1193	0	11423.6	12072.6			0.358877	2.78647
1194	0	11495.5	12037.6			0.392946	2.54488
1195	0	11567.4	12002.5			0.416084	2.40336
1196	0	11639.3	11967.4			0.31009	3.22487
1197	0	11711.2	11932.3			0.323651	3.08975
1198	0	11783.1	11897.3			0.326066	3.06687
1199	0	11855	11862.2			0.31572	3.16737
1200	0	11926.9	11827.1			0.325476	3.07242
1201	0	11998.8	11792.1			0.294298	3.39792
1202	0	12070.7	11757			0.324766	3.07914
1203	0	12142.6	11721.9			0.305882	3.26924
1204	0	12214.5	11686.9			0.297894	3.3569
1205	0	12286.4	11651.8			0.322601	3.0998
1206	0	12358.3	11616.7			0.276855	3.612
1207	0	12430.2	11581.6			0.282592	3.53866
1208	0	12502.1	11546.6			0.268431	3.72535
1209	0	12574	11511.5			0.259939	3.84705
1210	0	12646	11476.4			0.30316	3.29858
1211	0	12717.9	11441.4			0.262577	3.80841
1212	0	12789.8	11406.3			0.266026	3.75902
1213	0	12861.7	11371.2			0.294743	3.39279
1214	0	12933.6	11336.2			0.2807	3.56252
1215	0	13005.5	11301.1			0.25322	3.94913
1216	0	13077.4	11266			0.248327	4.02694
1217	0	13149.3	11231			0.248808	4.01917
1218	0	13221.2	11195.9			0.254902	3.92307
1219	0	13293.1	11160.8			0.318789	3.13687
1220	0	13365	11125.7			0.254699	3.92621
1221	0	13436.9	11090.7			0.204132	4.89878
1222	0	13508.8	11055.6			0.309116	3.23503
1223	0	13580.7	11020.5			0.262654	3.80728
1224	0	13652.6	10985.5			0.240975	4.1498
1225	0	13724.5	10950.4			0.265655	3.76429
1226	0	13796.4	10915.3			0.235353	4.24894
1227	0	7074.31	14104.9			0.317366	3.15093
1228	0	7146.21	14069.8			0.233263	4.28701
1229	0	7218.12	14034.8			0.306849	3.25894
1230	0	7290.02	13999.7			0.290474	3.44265
1231	0	7361.92	13964.6			0.300454	3.3283
1232	0	7433.83	13929.6			0.281578	3.55141
1233	0	7505.73	13894.5			0.265713	3.76346
1234	0	7577.63	13859.4			0.275923	3.62419
1235	0	7649.54	13824.3			0.267923	3.73242
1236	0	7721.44	13789.3			0.308779	3.23856
1237	0	7793.35	13754.2			0.305931	3.26871
1238	0	7865.25	13719.1			0.290888	3.43775
1239	0	7937.15	13684.1			0.31704	3.15418
1240	0	8009.06	13649			0.311468	3.2106
1241	0	8080.96	13613.9			0.335445	2.98112
1242	0	8152.86	13578.9			0.344516	2.90262
1243	0	8224.77	13543.8			0.348641	2.86828
1244	0	8296.67	13508.7			0.34699	2.88193
1245	0	8368.57	13473.6			0.35178	2.84269
1246	0	8440.48	13438.6			0.374426	2.67076
1247	0	8512.38	13403.5			0.338853	2.95113
1248	0	8584.28	13368.4			0.341552	2.92781
1249	0	8656.19	13333.4			0.326363	3.06407
1250	0	8728.09	13298.3			0.325713	3.07019
1251	0	8799.99	13263.2			0.431146	2.3194
1252	0	8871.9	13228.2			0.378231	2.64389
1253	0	8943.8	13193.1			0.356816	2.80257
1254	0	9015.71	13158			0.305176	3.2768
1255	0	9087.61	13122.9			0.377922	2.64605
1256	0	9159.51	13087.9			0.329326	3.03651
1257	0	9231.42	13052.8			0.385421	2.59457
1258	0	9303.32	13017.7			0.404991	2.46919
1259	0	9375.22	12982.7			0.362186	2.76101
1260	0	9447.13	12947.6			0.321326	3.11211
1261	0	9519.03	12912.5			0.340971	2.9328
1262	0	9590.93	12877.5			0.431251	2.31883
1263	0	9662.84	12842.4			0.290673	3.4403
1264	0	9734.74	12807.3			0.361255	2.76813
1265	0	9806.64	12772.3			0.307118	3.25608
1266	0	9878.55	12737.2			0.296365	3.37422
1267	0	9950.45	12702.1			0.298864	3.346
1268	0	10022.4	12667			0.262583	3.80832
1269	0	10094.3	12632			0.255898	3.90781
1270	0	10166.2	12596.9			0.263232	3.79893
1271	0	10238.1	12561.8			0.258589	3.86714
1272	0	10310	12526.8			0.261119	3.82967
1273	0	10381.9	12491.7			0.271423	3.68429
1274	0	10453.8	12456.6			0.25692	3.89227
1275	0	10525.7	12421.6			0.259031	3.86055
1276	0	10597.6	12386.5			0.269921	3.70479
1277	0	10669.5	12351.4			0.307188	3.25534
1278	0	10741.4	12316.3			0.350512	2.85297
1279	0	10813.3	12281.3			0.326079	3.06674
1280	0	10885.2	12246.2			0.308087	3.24584
1281	0	10957.1	12211.1			0.336367	2.97295
1282	0	11029	12176.1			0.355894	2.80982
1283	0	11100.9	12141			0.358669	2.78808
1284	0	11172.8	12105.9			0.374412	2.67086
1285	0	11244.7	12070.9			0.35723	2.79932
1286	0	11316.6	12035.8			0.325927	3.06817
1287	0	11388.5	12000.7			0.406479	2.46015
1288	0	11460.4	11965.6			0.406599	2.45943
1289	0	11532.3	11930.6			0.383446	2.60793
1290	0	11604.2	11895.5			0.359971	2.778
1291	0	11676.1	11860.4			0.36163	2.76526
1292	0	11748	11825.4			0.339751	2.94333
1293	0	11819.9	11790.3			0.354496	2.82091
1294	0	11891.8	11755.2			0.354387	2.82177
1295	0	11963.7	11720.2			0.311093	3.21447
1296	0	12035.7	11685.1			0.351416	2.84563
1297	0	12107.6	11650			0.321756	3.10794
1298	0	12179.5	11615			0.321492	3.1105
1299	0	12251.4	11579.9			0.31284	3.19652
1300	0	12323.3	11544.8			0.31444	3.18025
1301	0	12395.2	11509.7			0.317011	3.15446
1302	0	12467.1	11474.7			0.311397	3.21134
1303	0	12539	11439.6			0.300475	3.32806
1304	0	12610.9	11404.5			0.34946	2.86156
1305	0	12682.8	11369.5			0.310451	3.22112
1306	0	12754.7	11334.4			0.302488	3.30592
1307	0	12826.6	11299.3			0.261573	3.82302
1308	0	12898.5	11264.3			0.282235	3.54314
1309	0	12970.4	11229.2			0.265583	3.7653
1310	0	13042.3	11194.1			0.254254	3.93307
1311	0	13114.2	11159			0.257004	3.89099
1312	0	13186.1	11124			0.293865	3.40293
1313	0	13258	11088.9			0.307685	3.25008
1314	0	13329.9	11053.8			0.2491	4.01445
1315	0	13401.8	11018.8			0.258863	3.86305
1316	0	13473.7	10983.7			0.233508	4.2825
1317	0	13545.6	10948.6			0.266225	3.75622
1318	0	13617.5	10913.6			0.219621	4.55331
1319	0	13689.4	10878.5			0.220305	4.53916
1320	0	13761.3	10843.4			0.256315	3.90145
1321	0	6967.34	14068.1			0.277419	3.60465
1322	0	7039.24	14033			0.184362	5.42411
1323	0	7111.14	13997.9			0.278343	3.59269
1324	0	7183.05	13962.9			0.25652	3.89834
1325	0	7254.95	13927.8			0.276747	3.61341
1326	0	7326.85	13892.7			0.273625	3.65463
1327	0	7398.76	13857.6			0.281702	3.54985
1328	0	7470.66	13822.6			0.297901	3.35682
1329	0	7542.57	13787.5			0.303533	3.29454
1330	0	7614.47	13752.4			0.266236	3.75607
1331	0	7686.37	13717.4			0.268173	3.72893
1332	0	7758.28	13682.3			0.286825	3.48644
1333	0	7830.18	13647.2			0.265401	3.76788
1334	0	7902.08	13612.2			0.320834	3.11688
1335	0	7973.99	13577.1			0.304118	3.28819
1336	0	8045.89	13542			0.319873	3.12624
1337	0	8117.79	13507			0.373904	2.67449
1338	0	8189.7	13471.9			0.275055	3.63564
1339	0	8261.6	13436.8			0.323921	3.08718
1340	0	8333.5	13401.7			0.322159	3.10406
1341	0	8405.41	13366.7			0.370666	2.69785
1342	0	8477.31	13331.6			0.355457	2.81328
1343	0	8549.21	13296.5			0.328665	3.04261
1344	0	8621.12	13261.5			0.312406	3.20097
1345	0	8693.02	13226.4			0.348215	2.87179
1346	0	8764.92	13191.3			0.362162	2.76119
1347	0	8836.83	13156.3			0.442563	2.25957
1348	0	8908.73	13121.2			0.362064	2.76194
1349	0	8980.64	13086.1			0.33651	2.97168
1350	0	9052.54	13051			0.379323	2.63628
1351	0	9124.44	13016			0.349293	2.86293
1352	0	9196.35	12980.9			0.326762	3.06033
1353	0	9268.25	12945.8			0.325089	3.07608
1354	0	9340.15	12910.8			0.347963	2.87387
1355	0	9412.06	12875.7			0.327394	3.05442
1356	0	9483.96	12840.6			0.336721	2.96982
1357	0	9555.86	12805.6			0.300526	3.3275
1358	0	9627.77	12770.5			0.322238	3.1033
1359	0	9699.67	12735.4			0.297785	3.35813
1360	0	9771.57	12700.3			0.287708	3.47575
1361	0	9843.48	12665.3			0.29675	3.36985
1362	0	9915.38	12630.2			0.276384	3.61816
1363	0	9987.28	12595.1			0.299056	3.34386
1364	0	10059.2	12560.1			0.262077	3.81568
1365	0	10131.1	12525			0.252621	3.95849
1366	0	10203	12489.9			0.266903	3.74668
1367	0	10274.9	12454.9			0.241813	4.13543
1368	0	10346.8	12419.8			0.296442	3.37334
1369	0	10418.7	12384.7			0.247064	4.04753
1370	0	10490.6	12349.7			0.274008	3.64953
1371	0	10562.5	12314.6			0.255772	3.90973
1372	0	10634.4	12279.5			0.294938	3.39054
1373	0	10706.3	12244.4			0.335438	2.98117
1374	0	10778.2	12209.4			0.295441	3.38477
1375	0	10850.1	12174.3			0.315119	3.1734
1376	0	10922	12139.2			0.314725	3.17738
1377	0	10993.9	12104.2			0.333481	2.99867
1378	0	11065.8	12069.1			0.255473	3.9143
1379	0	11137.7	12034			0.335289	2.9825
1380	0	11209.6	11999			0.428662	2.33284
1381	0	11281.5	11963.9			0.315869	3.16587
1382	0	11353.5	11928.8			0.38179	2.61924
1383	0	11425.4	11893.7			0.359598	2.78088
1384	0	11497.3	11858.7			0.363497	2.75106
1385	0	11569.2	11823.6			0.321058	3.1147
1386	0	11641.1	11788.5			0.317814	3.14649
1387	0	11713	11753.5			0.325033	3.07661
1388	0	11784.9	11718.4			0.319022	3.13458
1389	0	11856.8	11683.3			0.272441	3.67051
1390	0	11928.7	11648.3			0.332382	3.00859
1391	0	12000.6	11613.2			0.307394	3.25315
1392	0	12072.5	11578.1			0.309126	3.23493
1393	0	12144.4	11543			0.32608	3.06674
1394	0	12216.3	11508			0.335121	2.98399
1395	0	12288.2	11472.9			0.295181	3.38775
1396	0	12360.1	11437.8			0.278705	3.58802
1397	0	12432	11402.8			0.295774	3.38096
1398	0	12503.9	11367.7			0.303536	3.29451
1399	0	12575.8	11332.6			0.299532	3.33854
1400	0	12647.7	11297.6			0.295491	3.3842
1401	0	12719.6	11262.5			0.316352	3.16104
1402	0	12791.5	11227.4			0.273432	3.65722
1403	0	12863.4	11192.4			0.30344	3.29555
1404	0	12935.3	11157.3			0.262544	3.80889
1405	0	13007.2	11122.2			0.275039	3.63585
1406	0	13079.1	11087.1			0.24013	4.16442
1407	0	13151	11052.1			0.264598	3.77932
1408	0	13222.9	11017			0.232746	4.29653
1409	0	13294.8	10981.9			0.263697	3.79223
1410	0	13366.8	10946.9			0.262459	3.81013
1411	0	13438.7	10911.8			0.224322	4.45787
1412	0	13510.6	10876.7			0.239026	4.18365
1413	0	13582.5	10841.7			0.237787	4.20545
1414	0	13654.4	10806.6			0.255088	3.92021
1415	0	13726.3	10771.5			0.213016	4.69447
1416	0	6860.36	14031.2			0.315857	3.16599
1417	0	6932.27	13996.2			0.225617	4.43229
1418	0	7004.17	13961.1			0.289227	3.45749
1419	0	7076.07	13926			0.223875	4.46678
1420	0	7147.98	13891			0.246822	4.0515
1421	0	7219.88	13855.9			0.291425	3.43141
1422	0	7291.78	13820.8			0.2944	3.39673
1423	0	7363.69	13785.7			0.243645	4.10433
1424	0	7435.59	13750.7			0.26527	3.76974
1425	0	7507.5	13715.6			0.262333	3.81195
1426	0	7579.4	13680.5			0.260044	3.8455
1427	0	7651.3	13645.5			0.280827	3.56091
1428	0	7723.21	13610.4			0.284382	3.5164
1429	0	7795.11	13575.3			0.286229	3.4937
1430	0	7867.01	13540.3			0.290268	3.4451
1431	0	7938.92	13505.2			0.310888	3.21659
1432	0	8010.82	13470.1			0.276481	3.61689
1433	0	8082.72	13435			0.320671	3.11846
1434	0	8154.63	13400			0.30739	3.25319
1435	0	8226.53	13364.9			0.322379	3.10194
1436	0	8298.43	13329.8			0.339765	2.94321
1437	0	8370.34	13294.8			0.39454	2.5346
1438	0	8442.24	13259.7			0.385585	2.59346
1439	0	8514.14	13224.6			0.324937	3.07752
1440	0	8586.05	13189.6			0.379875	2.63244
1441	0	8657.95	13154.5			0.337435	2.96354
1442	0	8729.86	13119.4			0.351347	2.84619
1443	0	8801.76	13084.4			0.328122	3.04765
1444	0	8873.66	13049.3			0.365262	2.73776
1445	0	8945.57	13014.2			0.371366	2.69276
1446	0	9017.47	12979.1			0.369307	2.70777
1447	0	9089.37	12944.1			0.369022	2.70987
1448	0	9161.28	12909			0.39995	2.50031
1449	0	9233.18	12873.9			0.326852	3.05949
1450	0	9305.08	12838.9			0.381889	2.61856
1451	0	9376.99	12803.8			0.319653	3.12839
1452	0	9448.89	12768.7			0.282318	3.54211
1453	0	9520.79	12733.7			0.30364	3.29337
1454	0	9592.7	12698.6			0.312239	3.20267
1455	0	9664.6	12663.5			0.286676	3.48826
1456	0	9736.5	12628.4			0.291983	3.42485
1457	0	9808.41	12593.4			0.283839	3.52312
1458	0	9880.31	12558.3			0.292899	3.41415
1459	0	9952.22	12523.2			0.244504	4.08992
1460	0	10024.1	12488.2			0.264147	3.78577
1461	0	10096	12453.1			0.247264	4.04426
1462	0	10167.9	12418			0.250895	3.98573
1463	0	10239.8	12383			0.263251	3.79865
1464	0	10311.7	12347.9			0.266747	3.74887
1465	0	10383.6	12312.8			0.242222	4.12844
1466	0	10455.5	12277.7			0.28248	3.54008
1467	0	10527.4	12242.7			0.265266	3.7698
1468	0	10599.3	12207.6			0.289255	3.45716
1469	0	10671.3	12172.5			0.276333	3.61882
1470	0	10743.2	12137.5			0.313548	3.1893
1471	0	10815.1	12102.4			0.336198	2.97443
1472	0	10887	12067.3			0.344066	2.90642
1473	0	10958.9	12032.3			0.300631	3.32634
1474	0	11030.8	11997.2			0.308502	3.24147
1475	0	11102.7	11962.1			0.388556	2.57363
1476	0	11174.6	11927.1			0.420263	2.37946
1477	0	11246.5	11892			0.324682	3.07994
1478	0	11318.4	11856.9			0.403191	2.48021
1479	0	11390.3	11821.8			0.363282	2.75268
1480	0	11462.2	11786.8			0.340403	2.9377
1481	0	11534.1	11751.7			0.313618	3.18859
1482	0	11606	11716.6			0.283302	3.5298
1483	0	11677.9	11681.6			0.315051	3.17409
1484	0	11749.8	11646.5			0.379072	2.63802
1485	0	11821.7	11611.4			0.327387	3.05449
1486	0	11893.6	11576.4			0.326962	3.05846
1487	0	11965.5	11541.3			0.327111	3.05707
1488	0	12037.4	11506.2			0.28916	3.4583
1489	0	12109.3	11471.1			0.296484	3.37286
1490	0	12181.2	11436.1			0.307854	3.2483
1491	0	12253.1	11401			0.311872	3.20644
1492	0	12325	11365.9			0.346068	2.88961
1493	0	12396.9	11330.9			0.282145	3.54427
1494	0	12468.8	11295.8			0.309071	3.2355
1495	0	12540.7	11260.7			0.277147	3.60819
1496	0	12612.6	11225.7			0.260595	3.83738
1497	0	12684.5	11190.6			0.305685	3.27134
1498	0	12756.5	11155.5			0.31917	3.13312
1499	0	12828.4	11120.4			0.262653	3.8073
1500	0	12900.3	11085.4			0.238115	4.19965
1501	0	12972.2	11050.3			0.28229	3.54246
1502	0	13044.1	11015.2			0.261638	3.82208
1503	0	13116	10980.2			0.268166	3.72904
1504	0	13187.9	10945.1			0.24444	4.09099
1505	0	13259.8	10910			0.242746	4.11954
1506	0	13331.7	10875			0.242889	4.11711
1507	0	13403.6	10839.9			0.232252	4.30567
1508	0	13475.5	10804.8			0.241824	4.13524
1509	0	13547.4	10769.8			0.240277	4.16186
1510	0	13619.3	10734.7			0.220482	4.53551
1511	0	13691.2	10699.6			0.21086	4.74249
1512	0	13763.1	10664.5			0.217237	4.60326
1513	0	6753.39	13994.4			0.306931	3.25806
1514	0	6825.29	13959.3			0.265538	3.76594
1515	0	6897.2	13924.3			0.193194	5.17613
1516	0	6969.1	13889.2			0.26391	3.78917
1517	0	7041	13854.1			0.289437	3.45499
1518	0	7112.91	13819.1			0.27483	3.63861
1519	0	7184.81	13784			0.302305	3.30792
1520	0	7256.72	13748.9			0.2981	3.35458
1521	0	7328.62	13713.8			0.277702	3.60099
1522	0	7400.52	13678.8			0.302647	3.30418
1523	0	7472.43	13643.7			0.313111	3.19375
1524	0	7544.33	13608.6			0.278341	3.59271
1525	0	7616.23	13573.6			0.29659	3.37165
1526	0	7688.14	13538.5			0.281158	3.55672
1527	0	7760.04	13503.4			0.300039	3.3329
1528	0	7831.94	13468.4			0.312041	3.2047
1529	0	7903.85	13433.3			0.308583	3.24062
1530	0	7975.75	13398.2			0.323295	3.09315
1531	0	8047.65	13363.1			0.317339	3.15121
1532	0	8119.56	13328.1			0.314405	3.18061
1533	0	8191.46	13293			0.295582	3.38316
1534	0	8263.36	13257.9			0.32447	3.08195
1535	0	8335.27	13222.9			0.369574	2.70582
1536	0	8407.17	13187.8			0.326637	3.0615
1537	0	8479.07	13152.7			0.34978	2.85894
1538	0	8550.98	13117.7			0.434181	2.30319
1539	0	8622.88	13082.6			0.394596	2.53424
1540	0	8694.79	13047.5			0.290496	3.44239
1541	0	8766.69	13012.4			0.385528	2.59385
1542	0	8838.59	12977.4			0.29988	3.33466
1543	0	8910.5	12942.3			0.380182	2.63032
1544	0	8982.4	12907.2			0.358354	2.79054
1545	0	9054.3	12872.2			0.33781	2.96025
1546	0	9126.21	12837.1			0.326156	3.06602
1547	0	9198.11	12802			0.340619	2.93583
1548	0	9270.01	12767			0.460236	2.1728
1549	0	9341.92	12731.9			0.423071	2.36367
1550	0	9413.82	12696.8			0.340809	2.9342
1551	0	9485.72	12661.8			0.335409	2.98144
1552	0	9557.63	12626.7			0.302961	3.30075
1553	0	9629.53	12591.6			0.301116	3.32098
1554	0	9701.43	12556.5			0.273134	3.66121
1555	0	9773.34	12521.5			0.245443	4.07426
1556	0	9845.24	12486.4			0.250839	3.98662
1557	0	9917.15	12451.3			0.25666	3.89621
1558	0	9989.05	12416.3			0.273791	3.65242
1559	0	10061	12381.2			0.262978	3.8026
1560	0	10132.9	12346.1			0.227387	4.39779
1561	0	10204.8	12311.1			0.248003	4.03221
1562	0	10276.7	12276			0.24988	4.00192
1563	0	10348.6	12240.9			0.295143	3.38819
1564	0	10420.5	12205.8			0.267027	3.74494
1565	0	10492.4	12170.8			0.251576	3.97495
1566	0	10564.3	12135.7			0.255081	3.92033
1567	0	10636.2	12100.6			0.296849	3.36872
1568	0	10708.1	12065.6			0.302807	3.30243
1569	0	10780	12030.5			0.284481	3.51518
1570	0	10851.9	11995.4			0.328238	3.04657
1571	0	10923.8	11960.4			0.327146	3.05674
1572	0	10995.7	11925.3			0.325717	3.07015
1573	0	11067.6	11890.2			0.296807	3.3692
1574	0	11139.5	11855.1			0.322978	3.09619
1575	0	11211.4	11820.1			0.407482	2.4541
1576	0	11283.3	11785			0.373094	2.68029
1577	0	11355.2	11749.9			0.327998	3.0488
1578	0	11427.1	11714.9			0.343382	2.91221
1579	0	11499	11679.8			0.353873	2.82587
1580	0	11570.9	11644.7			0.260939	3.83231
1581	0	11642.8	11609.7			0.31542	3.17037
1582	0	11714.7	11574.6			0.3058	3.27011
1583	0	11786.6	11539.5			0.289705	3.45179
1584	0	11858.5	11504.5			0.402209	2.48627
1585	0	11930.4	11469.4			0.364892	2.74054
1586	0	12002.3	11434.3			0.330334	3.02724
1587	0	12074.3	11399.2			0.341687	2.92665
1588	0	12146.2	11364.2			0.293335	3.40907
1589	0	12218.1	11329.1			0.323227	3.0938
1590	0	12290	11294			0.33206	3.0115
1591	0	12361.9	11259			0.329833	3.03184
1592	0	12433.8	11223.9			0.28672	3.48772
1593	0	12505.7	11188.8			0.277856	3.59898
1594	0	12577.6	11153.8			0.312496	3.20004
1595	0	12649.5	11118.7			0.294409	3.39663
1596	0	12721.4	11083.6			0.265098	3.77219
1597	0	12793.3	11048.5			0.280255	3.56818
1598	0	12865.2	11013.5			0.246153	4.06251
1599	0	12937.1	10978.4			0.279547	3.57722
1600	0	13009	10943.3			0.239805	4.17005
1601	0	13080.9	10908.3			0.256317	3.90142
1602	0	13152.8	10873.2			0.238328	4.19591
1603	0	13224.7	10838.1			0.255405	3.91534
1604	0	13296.6	10803.1			0.215275	4.64522
1605	0	13368.5	10768			0.223543	4.4734
1606	0	13440.4	10732.9			0.263029	3.80187
1607	0	13512.3	10697.8			0.207367	4.82236
1608	0	13584.2	10662.8			0.234784	4.25923
1609	0	13656.1	10627.7			0.226787	4.40942
1610	0	13728	10592.6			0.229983	4.34815
1611	0	6718.32	13922.5			0.278519	3.59041
1612	0	6790.22	13887.4			0.18265	5.47495
1613	0	6862.13	13852.4			0.195925	5.10398
1614	0	6934.03	13817.3			0.26347	3.7955
1615	0	7005.93	13782.2			0.279898	3.57272
1616	0	7077.84	13747.1			0.238891	4.18602
1617	0	7149.74	13712.1			0.27692	3.61115
1618	0	7221.65	13677			0.262576	3.80842
1619	0	7293.55	13641.9			0.275972	3.62355
1620	0	7365.45	13606.9			0.32838	3.04525
1621	0	7437.36	13571.8			0.320865	3.11658
1622	0	7509.26	13536.7			0.310683	3.21871
1623	0	7581.16	13501.7			0.312485	3.20015
1624	0	7653.07	13466.6			0.27844	3.59144
1625	0	7724.97	13431.5			0.304819	3.28063
1626	0	7796.87	13396.5			0.294381	3.39695
1627	0	7868.78	13361.4			0.301979	3.31149
1628	0	7940.68	13326.3			0.310359	3.22207
1629	0	8012.58	13291.2			0.259507	3.85347
1630	0	8084.49	13256.2			0.287141	3.48261
1631	0	8156.39	13221.1			0.264352	3.78283
1632	0	8228.29	13186			0.291532	3.43016
1633	0	8300.2	13151			0.303323	3.29682
1634	0	8372.1	13115.9			0.296263	3.37538
1635	0	8444.01	13080.8			0.319707	3.12787
1636	0	8515.91	13045.8			0.379668	2.63388
1637	0	8587.81	13010.7			0.292588	3.41777
1638	0	8659.72	12975.6			0.33514	2.98383
1639	0	8731.62	12940.5			0.356305	2.80658
1640	0	8803.52	12905.5			0.375961	2.65985
1641	0	8875.43	12870.4			0.366409	2.72919
1642	0	8947.33	12835.3			0.352951	2.83325
1643	0	9019.23	12800.3			0.350837	2.85033
1644	0	9091.14	12765.2			0.313083	3.19404
1645	0	9163.04	12730.1			0.274807	3.63892
1646	0	9234.94	12695.1			0.351943	2.84137
1647	0	9306.85	12660			0.330866	3.02237
1648	0	9378.75	12624.9			0.324098	3.08548
1649	0	9450.65	12589.8			0.329621	3.03379
1650	0	9522.56	12554.8			0.330055	3.02979
1651	0	9594.46	12519.7			0.300797	3.3245
1652	0	9666.37	12484.6			0.28292	3.53457
1653	0	9738.27	12449.6			0.284562	3.51418
1654	0	9810.17	12414.5			0.283529	3.52697
1655	0	9882.08	12379.4			0.288881	3.46163
1656	0	9953.98	12344.4			0.255803	3.90925
1657	0	10025.9	12309.3			0.254119	3.93516
1658	0	10097.8	12274.2			0.240249	4.16234
1659	0	10169.7	12239.2			0.239662	4.17255
1660	0	10241.6	12204.1			0.2668	3.74812
1661	0	10313.5	12169			0.290444	3.44301
1662	0	10385.4	12133.9			0.305816	3.26994
1663	0	10457.3	12098.9			0.282437	3.54062
1664	0	10529.2	12063.8			0.285516	3.50242
1665	0	10601.1	12028.7			0.352866	2.83393
1666	0	10673	11993.7			0.303359	3.29643
1667	0	10744.9	11958.6			0.351845	2.84216
1668	0	10816.8	11923.5			0.2767	3.61402
1669	0	10888.7	11888.5			0.291521	3.43028
1670	0	10960.6	11853.4			0.373435	2.67785
1671	0	11032.5	11818.3			0.366612	2.72768
1672	0	11104.4	11783.2			0.412855	2.42216
1673	0	11176.3	11748.2			0.361795	2.764
1674	0	11248.2	11713.1			0.355905	2.80974
1675	0	11320.1	11678			0.393725	2.53985
1676	0	11392	11643			0.353509	2.82878
1677	0	11464	11607.9			0.384118	2.60337
1678	0	11535.9	11572.8			0.306843	3.259
1679	0	11607.8	11537.8			0.31726	3.15199
1680	0	11679.7	11502.7			0.321897	3.10659
1681	0	11751.6	11467.6			0.323849	3.08786
1682	0	11823.5	11432.5			0.314457	3.18009
1683	0	11895.4	11397.5			0.326318	3.0645
1684	0	11967.3	11362.4			0.295283	3.38658
1685	0	12039.2	11327.3			0.343381	2.91221
1686	0	12111.1	11292.3			0.33119	3.01941
1687	0	12183	11257.2			0.327521	3.05323
1688	0	12254.9	11222.1			0.305317	3.27529
1689	0	12326.8	11187.1			0.323241	3.09367
1690	0	12398.7	11152			0.29373	3.40448
1691	0	12470.6	11116.9			0.291685	3.42836
1692	0	12542.5	11081.9			0.285522	3.50236
1693	0	12614.4	11046.8			0.273388	3.6578
1694	0	12686.3	11011.7			0.28136	3.55417
1695	0	12758.2	10976.6			0.292689	3.41659
1696	0	12830.1	10941.6			0.286269	3.49322
1697	0	12902	10906.5			0.254664	3.92675
1698	0	12973.9	10871.4			0.239553	4.17444
1699	0	13045.8	10836.4			0.242732	4.11976
1700	0	13117.7	10801.3			0.228699	4.37257
1701	0	13189.6	10766.2			0.269821	3.70616
1702	0	13261.5	10731.2			0.238897	4.1859
1703	0	13333.4	10696.1			0.230923	4.33044
1704	0	13405.3	10661			0.239077	4.18275
1705	0	13477.3	10625.9			0.21968	4.55207
1706	0	13549.2	10590.9			0.246534	4.05623
1707	0	13621.1	10555.8			0.220331	4.53863
1708	0	13693	10520.7			0.185234	5.39858
1709	0	6611.35	13885.7			0.29254	3.41833
1710	0	6683.25	13850.6			0.199384	5.01545
1711	0	6755.15	13815.5			0.220653	4.532
1712	0	6827.06	13780.5			0.285543	3.5021
1713	0	6898.96	13745.4			0.291815	3.42682
1714	0	6970.87	13710.3			0.315984	3.16472
1715	0	7042.77	13675.2			0.283281	3.53006
1716	0	7114.67	13640.2			0.308223	3.2444
1717	0	7186.58	13605.1			0.289369	3.4558
1718	0	7258.48	13570			0.272734	3.66658
1719	0	7330.38	13535			0.280013	3.57126
1720	0	7402.29	13499.9			0.30985	3.22736
1721	0	7474.19	13464.8			0.310189	3.22384
1722	0	7546.09	13429.8			0.289294	3.45669
1723	0	7618	13394.7			0.302607	3.30462
1724	0	7689.9	13359.6			0.279542	3.57728
1725	0	7761.8	13324.5			0.293538	3.40671
1726	0	7833.71	13289.5			0.303959	3.28992
1727	0	7905.61	13254.4			0.338057	2.95808
1728	0	7977.51	13219.3			0.352882	2.83381
1729	0	8049.42	13184.3			0.329931	3.03094
1730	0	8121.32	13149.2			0.355284	2.81465
1731	0	8193.23	13114.1			0.292498	3.41883
1732	0	8265.13	13079.1			0.302951	3.30087
1733	0	8337.03	13044			0.29884	3.34627
1734	0	8408.94	13008.9			0.300014	3.33317
1735	0	8480.84	12973.8			0.340667	2.93542
1736	0	8552.74	12938.8			0.276075	3.62221
1737	0	8624.65	12903.7			0.36545	2.73636
1738	0	8696.55	12868.6			0.261805	3.81963
1739	0	8768.45	12833.6			0.267827	3.73375
1740	0	8840.36	12798.5			0.308152	3.24515
1741	0	8912.26	12763.4			0.271073	3.68904
1742	0	8984.16	12728.4			0.359563	2.78116
1743	0	9056.07	12693.3			0.336634	2.97059
1744	0	9127.97	12658.2			0.285674	3.50049
1745	0	9199.87	12623.2			0.339701	2.94376
1746	0	9271.78	12588.1			0.325802	3.06935
1747	0	9343.68	12553			0.312955	3.19535
1748	0	9415.58	12517.9			0.330828	3.02272
1749	0	9487.49	12482.9			0.280088	3.57031
1750	0	9559.39	12447.8			0.319698	3.12795
1751	0	9631.3	12412.7			0.306845	3.25897
1752	0	9703.2	12377.7			0.294106	3.40013
1753	0	9775.1	12342.6			0.297455	3.36185
1754	0	9847.01	12307.5			0.264874	3.77538
1755	0	9918.91	12272.5			0.25318	3.94977
1756	0	9990.81	12237.4			0.277371	3.60528
1757	0	10062.7	12202.3			0.272941	3.6638
1758	0	10134.6	12167.2			0.250775	3.98764
1759	0	10206.5	12132.2			0.274633	3.64123
1760	0	10278.4	12097.1			0.31095	3.21595
1761	0	10350.3	12062			0.26072	3.83553
1762	0	10422.2	12027			0.283757	3.52415
1763	0	10494.1	11991.9			0.281496	3.55245
1764	0	10566	11956.8			0.259673	3.85099
1765	0	10637.9	11921.8			0.284804	3.51118
1766	0	10709.8	11886.7			0.303807	3.29156
1767	0	10781.8	11851.6			0.279174	3.58199
1768	0	10853.7	11816.6			0.330782	3.02314
1769	0	10925.6	11781.5			0.265373	3.76828
1770	0	10997.5	11746.4			0.320105	3.12398
1771	0	11069.4	11711.3			0.355104	2.81608
1772	0	11141.3	11676.3			0.332065	3.01146
1773	0	11213.2	11641.2			0.361093	2.76937
1774	0	11285.1	11606.1			0.315951	3.16505
1775	0	11357	11571.1			0.370415	2.69968
1776	0	11428.9	11536			0.385694	2.59273
1777	0	11500.8	11500.9			0.376625	2.65516
1778	0	11572.7	11465.9			0.336685	2.97014
1779	0	11644.6	11430.8			0.313783	3.18692
1780	0	11716.5	11395.7			0.305696	3.27122
1781	0	11788.4	11360.6			0.278365	3.59241
1782	0	11860.3	11325.6			0.346827	2.88328
1783	0	11932.2	11290.5			0.298552	3.3495
1784	0	12004.1	11255.4			0.31111	3.2143
1785	0	12076	11220.4			0.302283	3.30816
1786	0	12147.9	11185.3			0.322953	3.09642
1787	0	12219.8	11150.2			0.303159	3.2986
1788	0	12291.7	11115.2			0.322918	3.09676
1789	0	12363.6	11080.1			0.297553	3.36075
1790	0	12435.5	11045			0.308603	3.24041
1791	0	12507.4	11009.9			0.343172	2.91399
1792	0	12579.3	10974.9			0.273693	3.65372
1793	0	12651.2	10939.8			0.293983	3.40155
1794	0	12723.1	10904.7			0.285598	3.50142
1795	0	12795.1	10869.7			0.241685	4.13762
1796	0	12867	10834.6			0.253536	3.94421
1797	0	12938.9	10799.5			0.297592	3.3603
1798	0	13010.8	10764.5			0.264693	3.77796
1799	0	13082.7	10729.4			0.285802	3.49893
1800	0	13154.6	10694.3			0.272587	3.66855
1801	0	13226.5	10659.3			0.268104	3.7299
1802	0	13298.4	10624.2			0.230684	4.33494
1803	0	13370.3	10589.1			0.243984	4.09862
1804	0	13442.2	10554			0.237509	4.21036
1805	0	13514.1	10519			0.228664	4.37322
1806	0	13586	10483.9			0.249925	4.0012
1807	0	13657.9	10448.8			0.19649	5.08932
1808	0	13729.8	10413.8			0.293493	3.40724
1809	0	6576.28	13813.8			0.211201	4.73482
1810	0	6648.18	13778.7			0.21016	4.75827
1811	0	6720.08	13743.6			0.26142	3.82526
1812	0	6791.99	13708.5			0.263332	3.79749
1813	0	6863.89	13673.5			0.291954	3.4252
1814	0	6935.8	13638.4			0.287277	3.48096
1815	0	7007.7	13603.3			0.323939	3.087
1816	0	7079.6	13568.3			0.296358	3.37429
1817	0	7151.51	13533.2			0.290932	3.43723
1818	0	7223.41	13498.1			0.285221	3.50606
1819	0	7295.31	13463.1			0.273741	3.65309
1820	0	7367.22	13428			0.315736	3.1672
1821	0	7439.12	13392.9			0.293573	3.40631
1822	0	7511.02	13357.9			0.315128	3.17331
1823	0	7582.93	13322.8			0.301248	3.31952
1824	0	7654.83	13287.7			0.281381	3.5539
1825	0	7726.73	13252.6			0.349675	2.8598
1826	0	7798.64	13217.6			0.323047	3.09552
1827	0	7870.54	13182.5			0.327291	3.05539
1828	0	7942.44	13147.4			0.3151	3.1736
1829	0	8014.35	13112.4			0.2853	3.50508
1830	0	8086.25	13077.3			0.27138	3.68487
1831	0	8158.16	13042.2			0.30179	3.31356
1832	0	8230.06	13007.2			0.292637	3.4172
1833	0	8301.96	12972.1			0.284187	3.51881
1834	0	8373.87	12937			0.313093	3.19394
1835	0	8445.77	12901.9			0.363361	2.75208
1836	0	8517.67	12866.9			0.32641	3.06363
1837	0	8589.58	12831.8			0.335966	2.97649
1838	0	8661.48	12796.7			0.331719	3.0146
1839	0	8733.38	12761.7			0.34717	2.88043
1840	0	8805.29	12726.6			0.347109	2.88094
1841	0	8877.19	12691.5			0.349268	2.86313
1842	0	8949.09	12656.5			0.293982	3.40157
1843	0	9021	12621.4			0.320613	3.11902
1844	0	9092.9	12586.3			0.350877	2.85
1845	0	9164.8	12551.2			0.33889	2.95081
1846	0	9236.71	12516.2			0.317341	3.15118
1847	0	9308.61	12481.1			0.332346	3.00891
1848	0	9380.52	12446			0.333217	3.00105
1849	0	9452.42	12411			0.308371	3.24284
1850	0	9524.32	12375.9			0.301384	3.31803
1851	0	9596.23	12340.8			0.326091	3.06663
1852	0	9668.13	12305.8			0.283191	3.53119
1853	0	9740.03	12270.7			0.339394	2.94643
1854	0	9811.94	12235.6			0.281456	3.55295
1855	0	9883.84	12200.6			0.248334	4.02684
1856	0	9955.74	12165.5			0.271668	3.68097
1857	0	10027.6	12130.4			0.28218	3.54384
1858	0	10099.6	12095.3			0.284111	3.51975
1859	0	10171.5	12060.3			0.269067	3.71655
1860	0	10243.4	12025.2			0.276353	3.61855
1861	0	10315.3	11990.1			0.295842	3.38018
1862	0	10387.2	11955.1			0.292317	3.42094
1863	0	10459.1	11920			0.312416	3.20086
1864	0	10531	11884.9			0.342074	2.92334
1865	0	10602.9	11849.9			0.317537	3.14924
1866	0	10674.8	11814.8			0.334638	2.98831
1867	0	10746.7	11779.7			0.36453	2.74326
1868	0	10818.6	11744.6			0.351993	2.84096
1869	0	10890.5	11709.6			0.300694	3.32564
1870	0	10962.4	11674.5			0.391265	2.55581
1871	0	11034.3	11639.4			0.317363	3.15096
1872	0	11106.2	11604.4			0.368034	2.71714
1873	0	11178.1	11569.3			0.363345	2.7522
1874	0	11250	11534.2			0.364973	2.73993
1875	0	11321.9	11499.2			0.368041	2.71709
1876	0	11393.8	11464.1			0.436498	2.29096
1877	0	11465.7	11429			0.392212	2.54964
1878	0	11537.6	11393.9			0.309415	3.23191
1879	0	11609.5	11358.9			0.33643	2.97239
1880	0	11681.4	11323.8			0.346511	2.88591
1881	0	11753.3	11288.7			0.279522	3.57754
1882	0	11825.2	11253.7			0.332198	3.01025
1883	0	11897.1	11218.6			0.326218	3.06544
1884	0	11969	11183.5			0.356512	2.80495
1885	0	12040.9	11148.5			0.331384	3.01764
1886	0	12112.8	11113.4			0.310727	3.21826
1887	0	12184.8	11078.3			0.305932	3.2687
1888	0	12256.7	11043.3			0.300188	3.33124
1889	0	12328.6	11008.2			0.290849	3.43821
1890	0	12400.5	10973.1			0.333127	3.00186
1891	0	12472.4	10938			0.330072	3.02964
1892	0	12544.3	10903			0.315317	3.17142
1893	0	12616.2	10867.9			0.304086	3.28855
1894	0	12688.1	10832.8			0.264852	3.7757
1895	0	12760	10797.8			0.271393	3.68469
1896	0	12831.9	10762.7			0.277712	3.60086
1897	0	12903.8	10727.6			0.30149	3.31686
1898	0	12975.7	10692.6			0.262549	3.80882
1899	0	13047.6	10657.5			0.278734	3.58765
1900	0	13119.5	10622.4			0.281685	3.55006
1901	0	13191.4	10587.3			0.268123	3.72964
1902	0	13263.3	10552.3			0.237979	4.20205
1903	0	13335.2	10517.2			0.201551	4.96152
1904	0	13407.1	10482.1			0.222496	4.49446
1905	0	13479	10447.1			0.231492	4.31981
1906	0	13550.9	10412			0.192312	5.19989
1907	0	13622.8	10376.9			0.289619	3.45281
1908	0	13694.7	10341.9			0.239221	4.18024
1909	0	6469.3	13776.9			0.224046	4.46337
1910	0	6541.21	13741.9			0.217164	4.60481
1911	0	6613.11	13706.8			0.276637	3.61485
1912	0	6685.02	13671.7			0.317386	3.15074
1913	0	6756.92	13636.6			0.335713	2.97874
1914	0	6828.82	13601.6			0.282297	3.54237
1915	0	6900.73	13566.5			0.287582	3.47726
1916	0	6972.63	13531.4			0.298739	3.34741
1917	0	7044.53	13496.4			0.279879	3.57298
1918	0	7116.44	13461.3			0.297763	3.35837
1919	0	7188.34	13426.2			0.256892	3.89269
1920	0	7260.24	13391.2			0.285568	3.50179
1921	0	7332.15	13356.1			0.292708	3.41638
1922	0	7404.05	13321			0.318117	3.1435
1923	0	7475.95	13285.9			0.286046	3.49594
1924	0	7547.86	13250.9			0.369375	2.70727
1925	0	7619.76	13215.8			0.300242	3.33064
1926	0	7691.66	13180.7			0.265077	3.77249
1927	0	7763.57	13145.7			0.324401	3.0826
1928	0	7835.47	13110.6			0.288189	3.46995
1929	0	7907.38	13075.5			0.305522	3.27309
1930	0	7979.28	13040.5			0.298557	3.34944
1931	0	8051.18	13005.4			0.304261	3.28665
1932	0	8123.09	12970.3			0.313986	3.18486
1933	0	8194.99	12935.3			0.285562	3.50186
1934	0	8266.89	12900.2			0.318838	3.13639
1935	0	8338.8	12865.1			0.281022	3.55844
1936	0	8410.7	12830			0.309455	3.23149
1937	0	8482.6	12795			0.306245	3.26536
1938	0	8554.51	12759.9			0.36079	2.7717
1939	0	8626.41	12724.8			0.334412	2.99032
1940	0	8698.31	12689.8			0.334088	2.99322
1941	0	8770.22	12654.7			0.32586	3.06881
1942	0	8842.12	12619.6			0.347935	2.8741
1943	0	8914.02	12584.6			0.323183	3.09422
1944	0	8985.93	12549.5			0.341115	2.93156
1945	0	9057.83	12514.4			0.319386	3.13101
1946	0	9129.73	12479.3			0.306914	3.25824
1947	0	9201.64	12444.3			0.35787	2.79431
1948	0	9273.54	12409.2			0.345038	2.89823
1949	0	9345.45	12374.1			0.334886	2.98609
1950	0	9417.35	12339.1			0.36418	2.7459
1951	0	9489.25	12304			0.343442	2.9117
1952	0	9561.16	12268.9			0.33458	2.98882
1953	0	9633.06	12233.9			0.283107	3.53223
1954	0	9704.96	12198.8			0.32073	3.11789
1955	0	9776.87	12163.7			0.321487	3.11055
1956	0	9848.77	12128.6			0.341539	2.92792
1957	0	9920.67	12093.6			0.282572	3.53892
1958	0	9992.58	12058.5			0.304547	3.28356
1959	0	10064.5	12023.4			0.307185	3.25537
1960	0	10136.4	11988.4			0.269661	3.70836
1961	0	10208.3	11953.3			0.333234	3.00089
1962	0	10280.2	11918.2			0.304001	3.28946
1963	0	10352.1	11883.2			0.288047	3.47166
1964	0	10424	11848.1			0.312802	3.19691
1965	0	10495.9	11813			0.356026	2.80879
1966	0	10567.8	11778			0.309443	3.23161
1967	0	10639.7	11742.9			0.348826	2.86675
1968	0	10711.6	11707.8			0.323315	3.09296
1969	0	10783.5	11672.7			0.297389	3.36259
1970	0	10855.4	11637.7			0.32878	3.04154
1971	0	10927.3	11602.6			0.325958	3.06788
1972	0	10999.2	11567.5			0.261281	3.8273
1973	0	11071.1	11532.5			0.269867	3.70553
1974	0	11143	11497.4			0.292203	3.42228
1975	0	11214.9	11462.3			0.347956	2.87392
1976	0	11286.8	11427.3			0.330273	3.0278
1977	0	11358.7	11392.2			0.304328	3.28593
1978	0	11430.6	11357.1			0.345672	2.89291
1979	0	11502.6	11322			0.34815	2.87233
1980	0	11574.5	11287			0.363864	2.74828
1981	0	11646.4	11251.9			0.34235	2.92099
1982	0	11718.3	11216.8			0.319928	3.1257
1983	0	11790.2	11181.8			0.300538	3.32737
1984	0	11862.1	11146.7			0.353863	2.82595
1985	0	11934	11111.6			0.309186	3.2343
1986	0	12005.9	11076.6			0.336664	2.97032
1987	0	12077.8	11041.5			0.299762	3.33598
1988	0	12149.7	11006.4			0.280227	3.56854
1989	0	12221.6	10971.3			0.309075	3.23546
1990	0	12293.5	10936.3			0.3069	3.25839
1991	0	12365.4	10901.2			0.270245	3.70035
1992	0	12437.3	10866.1			0.263476	3.79541
1993	0	12509.2	10831.1			0.345305	2.89599
1994	0	12581.1	10796			0.277035	3.60966
1995	0	12653	10760.9			0.278345	3.59266
1996	0	12724.9	10725.9			0.271672	3.68091
1997	0	12796.8	10690.8			0.280473	3.56541
1998	0	12868.7	10655.7			0.265743	3.76304
[truncated: 50,357 more rows]

## Sheet: Fig 5I
spotId	raster	x	y	z	Date	Glutamate/Aspartate
0	0	3047.2	14835.2	0		1.28729
1	0	3127.2	14835.2	0		14.2622
2	0	2407.2	14755.2	0		1.28729
3	0	2487.2	14755.2	0		1.67102
4	0	2567.2	14755.2	0		31.3355
5	0	2647.2	14755.2	0		3.89639
6	0	2727.2	14755.2	0		3.83868
7	0	2807.2	14755.2	0		4.61865
8	0	2887.2	14755.2	0		4.09724
9	0	2967.2	14755.2	0		4.1874
10	0	3047.2	14755.2	0		4.59606
11	0	3127.2	14755.2	0		4.76075
12	0	1847.2	14675.2	0		12.472
13	0	1927.2	14675.2	0		8.74157
14	0	2007.2	14675.2	0		3.5448
15	0	2087.2	14675.2	0		3.33503
16	0	2167.2	14675.2	0		3.13449
17	0	2247.2	14675.2	0		3.31237
18	0	2327.2	14675.2	0		3.86804
19	0	2407.2	14675.2	0		3.5596
20	0	2487.2	14675.2	0		3.87914
21	0	2567.2	14675.2	0		3.65398
22	0	2647.2	14675.2	0		3.79417
23	0	2727.2	14675.2	0		3.77194
24	0	2807.2	14675.2	0		4.08071
25	0	2887.2	14675.2	0		4.15564
26	0	2967.2	14675.2	0		4.65851
27	0	3047.2	14675.2	0		4.48735
28	0	3127.2	14675.2	0		4.3703
29	0	3207.2	14675.2	0		4.62905
30	0	1367.2	14595.2	0		1.28729
31	0	1447.2	14595.2	0		23.0267
32	0	1527.2	14595.2	0		13.4866
33	0	1607.2	14595.2	0		1.59088
34	0	1687.2	14595.2	0		5.90783
35	0	1767.2	14595.2	0		3.55562
36	0	1847.2	14595.2	0		3.63223
37	0	1927.2	14595.2	0		3.44856
38	0	2007.2	14595.2	0		3.40639
39	0	2087.2	14595.2	0		3.18329
40	0	2167.2	14595.2	0		3.2765
41	0	2247.2	14595.2	0		3.27035
42	0	2327.2	14595.2	0		3.2635
43	0	2407.2	14595.2	0		3.70168
44	0	2487.2	14595.2	0		3.75661
45	0	2567.2	14595.2	0		3.66623
46	0	2647.2	14595.2	0		3.7711
47	0	2727.2	14595.2	0		3.56927
48	0	2807.2	14595.2	0		3.51995
49	0	2887.2	14595.2	0		3.75388
50	0	2967.2	14595.2	0		4.50775
51	0	3047.2	14595.2	0		3.98661
52	0	3127.2	14595.2	0		4.2421
53	0	3207.2	14595.2	0		4.22975
54	0	887.2	14515.2	0		20.6735
55	0	967.2	14515.2	0		3.22418
56	0	1047.2	14515.2	0		4.75943
57	0	1127.2	14515.2	0		4.44672
58	0	1207.2	14515.2	0		4.73227
59	0	1287.2	14515.2	0		4.74886
60	0	1367.2	14515.2	0		5.31226
61	0	1447.2	14515.2	0		4.91
62	0	1527.2	14515.2	0		3.9865
63	0	1607.2	14515.2	0		4.1889
64	0	1687.2	14515.2	0		4.28202
65	0	1767.2	14515.2	0		3.53655
66	0	1847.2	14515.2	0		3.56531
67	0	1927.2	14515.2	0		3.37089
68	0	2007.2	14515.2	0		3.27718
69	0	2087.2	14515.2	0		3.39201
70	0	2167.2	14515.2	0		3.12671
71	0	2247.2	14515.2	0		3.31651
72	0	2327.2	14515.2	0		3.65127
73	0	2407.2	14515.2	0		3.47061
74	0	2487.2	14515.2	0		3.83025
75	0	2567.2	14515.2	0		3.4304
76	0	2647.2	14515.2	0		3.93116
77	0	2727.2	14515.2	0		3.42437
78	0	2807.2	14515.2	0		3.71178
79	0	2887.2	14515.2	0		4.14739
80	0	2967.2	14515.2	0		4.24338
81	0	3047.2	14515.2	0		3.95928
82	0	3127.2	14515.2	0		4.61356
83	0	3207.2	14515.2	0		4.6409
84	0	3287.2	14515.2	0		5.5372
85	0	407.2	14435.2	0		2.99416
86	0	487.2	14435.2	0		4.0054
87	0	567.2	14435.2	0		3.80922
88	0	647.2	14435.2	0		2.86489
89	0	727.2	14435.2	0		3.71236
90	0	807.2	14435.2	0		3.89806
91	0	887.2	14435.2	0		4.16078
92	0	967.2	14435.2	0		3.67205
93	0	1047.2	14435.2	0		4.26958
94	0	1127.2	14435.2	0		4.61767
95	0	1207.2	14435.2	0		4.98184
96	0	1287.2	14435.2	0		5.02522
97	0	1367.2	14435.2	0		4.62774
98	0	1447.2	14435.2	0		4.83204
99	0	1527.2	14435.2	0		4.1965
100	0	1607.2	14435.2	0		4.12456
101	0	1687.2	14435.2	0		3.68861
102	0	1767.2	14435.2	0		3.77704
103	0	1847.2	14435.2	0		3.3977
104	0	1927.2	14435.2	0		3.49659
105	0	2007.2	14435.2	0		3.09664
106	0	2087.2	14435.2	0		3.61918
107	0	2167.2	14435.2	0		3.10947
108	0	2247.2	14435.2	0		3.42551
109	0	2327.2	14435.2	0		3.3715
110	0	2407.2	14435.2	0		3.42663
111	0	2487.2	14435.2	0		3.4208
112	0	2567.2	14435.2	0		3.74616
113	0	2647.2	14435.2	0		3.46595
114	0	2727.2	14435.2	0		3.90129
115	0	2807.2	14435.2	0		3.69612
116	0	2887.2	14435.2	0		3.79361
117	0	2967.2	14435.2	0		4.04877
118	0	3047.2	14435.2	0		4.30864
119	0	3127.2	14435.2	0		4.54184
120	0	3207.2	14435.2	0		4.65365
121	0	3287.2	14435.2	0		4.58735
122	0	167.2	14355.2	0		4.04905
123	0	247.2	14355.2	0		3.96878
124	0	327.2	14355.2	0		3.64938
125	0	407.2	14355.2	0		3.1944
126	0	487.2	14355.2	0		3.13321
127	0	567.2	14355.2	0		2.9009
128	0	647.2	14355.2	0		2.99727
129	0	727.2	14355.2	0		3.38206
130	0	807.2	14355.2	0		3.2243
131	0	887.2	14355.2	0		3.55945
132	0	967.2	14355.2	0		3.7139
133	0	1047.2	14355.2	0		4.01877
134	0	1127.2	14355.2	0		4.22441
135	0	1207.2	14355.2	0		4.11747
136	0	1287.2	14355.2	0		4.59804
137	0	1367.2	14355.2	0		4.67756
138	0	1447.2	14355.2	0		4.48451
139	0	1527.2	14355.2	0		4.48014
140	0	1607.2	14355.2	0		4.1575
141	0	1687.2	14355.2	0		3.86763
142	0	1767.2	14355.2	0		3.44456
143	0	1847.2	14355.2	0		3.39117
144	0	1927.2	14355.2	0		3.53325
145	0	2007.2	14355.2	0		3.37329
146	0	2087.2	14355.2	0		3.32829
147	0	2167.2	14355.2	0		3.58508
148	0	2247.2	14355.2	0		3.52062
149	0	2327.2	14355.2	0		3.42465
150	0	2407.2	14355.2	0		3.4513
151	0	2487.2	14355.2	0		3.65939
152	0	2567.2	14355.2	0		3.9263
153	0	2647.2	14355.2	0		3.56876
154	0	2727.2	14355.2	0		3.43549
155	0	2807.2	14355.2	0		3.89581
156	0	2887.2	14355.2	0		4.18415
157	0	2967.2	14355.2	0		4.15232
158	0	3047.2	14355.2	0		4.08418
159	0	3127.2	14355.2	0		4.64786
160	0	3207.2	14355.2	0		4.53344
161	0	3287.2	14355.2	0		4.99109
162	0	3367.2	14355.2	0		4.85081
163	0	167.2	14275.2	0		3.13307
164	0	247.2	14275.2	0		3.6845
165	0	327.2	14275.2	0		3.25299
166	0	407.2	14275.2	0		3.5201
167	0	487.2	14275.2	0		3.04735
168	0	567.2	14275.2	0		3.36348
169	0	647.2	14275.2	0		2.77202
170	0	727.2	14275.2	0		3.09222
171	0	807.2	14275.2	0		3.27027
172	0	887.2	14275.2	0		3.60388
173	0	967.2	14275.2	0		3.44773
174	0	1047.2	14275.2	0		3.91177
175	0	1127.2	14275.2	0		4.08696
176	0	1207.2	14275.2	0		4.3361
177	0	1287.2	14275.2	0		4.43661
178	0	1367.2	14275.2	0		4.16417
179	0	1447.2	14275.2	0		4.54319
180	0	1527.2	14275.2	0		4.12718
181	0	1607.2	14275.2	0		3.9312
182	0	1687.2	14275.2	0		4.10567
183	0	1767.2	14275.2	0		4.20593
184	0	1847.2	14275.2	0		3.8575
185	0	1927.2	14275.2	0		3.66255
186	0	2007.2	14275.2	0		3.50805
187	0	2087.2	14275.2	0		3.45865
188	0	2167.2	14275.2	0		3.46857
189	0	2247.2	14275.2	0		3.52131
190	0	2327.2	14275.2	0		4.02036
191	0	2407.2	14275.2	0		3.79841
192	0	2487.2	14275.2	0		3.53728
193	0	2567.2	14275.2	0		3.71317
194	0	2647.2	14275.2	0		3.97494
195	0	2727.2	14275.2	0		3.80534
196	0	2807.2	14275.2	0		3.9166
197	0	2887.2	14275.2	0		3.99527
198	0	2967.2	14275.2	0		3.95626
199	0	3047.2	14275.2	0		4.12289
200	0	3127.2	14275.2	0		4.13435
201	0	3207.2	14275.2	0		3.95978
202	0	3287.2	14275.2	0		4.88535
203	0	3367.2	14275.2	0		5.37877
204	0	3447.2	14275.2	0		4.71284
205	0	3527.2	14275.2	0		4.46988
206	0	247.2	14195.2	0		3.44797
207	0	327.2	14195.2	0		3.57091
208	0	407.2	14195.2	0		3.23755
209	0	487.2	14195.2	0		3.03125
210	0	567.2	14195.2	0		2.99085
211	0	647.2	14195.2	0		3.04734
212	0	727.2	14195.2	0		2.84032
213	0	807.2	14195.2	0		3.24869
214	0	887.2	14195.2	0		3.27759
215	0	967.2	14195.2	0		3.73609
216	0	1047.2	14195.2	0		4.10816
217	0	1127.2	14195.2	0		4.02452
218	0	1207.2	14195.2	0		4.56414
219	0	1287.2	14195.2	0		5.04554
220	0	1367.2	14195.2	0		4.50733
221	0	1447.2	14195.2	0		4.37495
222	0	1527.2	14195.2	0		4.07816
223	0	1607.2	14195.2	0		4.152
224	0	1687.2	14195.2	0		3.77764
225	0	1767.2	14195.2	0		3.70327
226	0	1847.2	14195.2	0		3.97592
227	0	1927.2	14195.2	0		4.05004
228	0	2007.2	14195.2	0		3.69857
229	0	2087.2	14195.2	0		4.21687
230	0	2167.2	14195.2	0		3.73021
231	0	2247.2	14195.2	0		3.87045
232	0	2327.2	14195.2	0		3.839
233	0	2407.2	14195.2	0		3.89855
234	0	2487.2	14195.2	0		3.85484
235	0	2567.2	14195.2	0		3.39483
236	0	2647.2	14195.2	0		4.05111
237	0	2727.2	14195.2	0		3.78498
238	0	2807.2	14195.2	0		4.01243
239	0	2887.2	14195.2	0		4.25186
240	0	2967.2	14195.2	0		3.88083
241	0	3047.2	14195.2	0		4.2437
242	0	3127.2	14195.2	0		4.34204
243	0	3207.2	14195.2	0		4.52454
244	0	3287.2	14195.2	0		4.38573
245	0	3367.2	14195.2	0		4.85757
246	0	3447.2	14195.2	0		4.41304
247	0	3527.2	14195.2	0		4.56298
248	0	3607.2	14195.2	0		4.89473
249	0	3687.2	14195.2	0		3.39937
250	0	247.2	14115.2	0		3.35479
251	0	327.2	14115.2	0		3.37516
252	0	407.2	14115.2	0		3.56991
253	0	487.2	14115.2	0		3.48912
254	0	567.2	14115.2	0		3.16601
255	0	647.2	14115.2	0		3.09678
256	0	727.2	14115.2	0		3.13333
257	0	807.2	14115.2	0		3.28301
258	0	887.2	14115.2	0		3.3614
259	0	967.2	14115.2	0		3.50297
260	0	1047.2	14115.2	0		4.15416
261	0	1127.2	14115.2	0		4.48741
262	0	1207.2	14115.2	0		3.84325
263	0	1287.2	14115.2	0		4.80793
264	0	1367.2	14115.2	0		4.73525
265	0	1447.2	14115.2	0		4.38899
266	0	1527.2	14115.2	0		4.62064
267	0	1607.2	14115.2	0		4.56184
268	0	1687.2	14115.2	0		4.73374
269	0	1767.2	14115.2	0		4.24325
270	0	1847.2	14115.2	0		4.65975
271	0	1927.2	14115.2	0		4.22585
272	0	2007.2	14115.2	0		4.17419
273	0	2087.2	14115.2	0		4.01028
274	0	2167.2	14115.2	0		4.28616
275	0	2247.2	14115.2	0		4.08844
276	0	2327.2	14115.2	0		4.07408
277	0	2407.2	14115.2	0		3.92415
278	0	2487.2	14115.2	0		3.89663
279	0	2567.2	14115.2	0		3.84627
280	0	2647.2	14115.2	0		3.94688
281	0	2727.2	14115.2	0		3.85985
282	0	2807.2	14115.2	0		3.58934
283	0	2887.2	14115.2	0		3.68693
284	0	2967.2	14115.2	0		4.25748
285	0	3047.2	14115.2	0		4.16305
286	0	3127.2	14115.2	0		3.962
287	0	3207.2	14115.2	0		4.51633
288	0	3287.2	14115.2	0		4.97078
289	0	3367.2	14115.2	0		4.91016
290	0	3447.2	14115.2	0		4.69523
291	0	3527.2	14115.2	0		5.15431
292	0	3607.2	14115.2	0		5.6323
293	0	3687.2	14115.2	0		6.08193
294	0	247.2	14035.2	0		3.55464
295	0	327.2	14035.2	0		3.53473
296	0	407.2	14035.2	0		3.53528
297	0	487.2	14035.2	0		3.46235
298	0	567.2	14035.2	0		3.44987
299	0	647.2	14035.2	0		2.96626
300	0	727.2	14035.2	0		3.34493
301	0	807.2	14035.2	0		3.50631
302	0	887.2	14035.2	0		3.6986
303	0	967.2	14035.2	0		3.70704
304	0	1047.2	14035.2	0		4.46864
305	0	1127.2	14035.2	0		4.65767
306	0	1207.2	14035.2	0		4.44914
307	0	1287.2	14035.2	0		4.58548
308	0	1367.2	14035.2	0		4.24172
309	0	1447.2	14035.2	0		5.00006
310	0	1527.2	14035.2	0		4.60908
311	0	1607.2	14035.2	0		5.06137
312	0	1687.2	14035.2	0		4.90619
313	0	1767.2	14035.2	0		4.75258
314	0	1847.2	14035.2	0		5.29365
315	0	1927.2	14035.2	0		4.74912
316	0	2007.2	14035.2	0		4.47467
317	0	2087.2	14035.2	0		4.61845
318	0	2167.2	14035.2	0		4.24307
319	0	2247.2	14035.2	0		4.64886
320	0	2327.2	14035.2	0		4.47472
321	0	2407.2	14035.2	0		4.25836
322	0	2487.2	14035.2	0		3.99314
323	0	2567.2	14035.2	0		3.87515
324	0	2647.2	14035.2	0		3.88484
325	0	2727.2	14035.2	0		4.59803
326	0	2807.2	14035.2	0		4.03141
327	0	2887.2	14035.2	0		3.76616
328	0	2967.2	14035.2	0		4.017
329	0	3047.2	14035.2	0		4.00828
330	0	3127.2	14035.2	0		4.49004
331	0	3207.2	14035.2	0		4.52007
332	0	3287.2	14035.2	0		4.5947
333	0	3367.2	14035.2	0		5.07068
334	0	3447.2	14035.2	0		4.99823
335	0	3527.2	14035.2	0		4.91669
336	0	3607.2	14035.2	0		4.63436
337	0	3687.2	14035.2	0		5.30599
338	0	3767.2	14035.2	0		5.40467
339	0	247.2	13955.2	0		3.91887
340	0	327.2	13955.2	0		3.82153
341	0	407.2	13955.2	0		3.97522
342	0	487.2	13955.2	0		3.29824
343	0	567.2	13955.2	0		3.28677
344	0	647.2	13955.2	0		3.36002
345	0	727.2	13955.2	0		3.62142
346	0	807.2	13955.2	0		3.99028
347	0	887.2	13955.2	0		4.07372
348	0	967.2	13955.2	0		4.08764
349	0	1047.2	13955.2	0		3.98629
350	0	1127.2	13955.2	0		3.94875
351	0	1207.2	13955.2	0		4.2991
352	0	1287.2	13955.2	0		4.64782
353	0	1367.2	13955.2	0		4.34713
354	0	1447.2	13955.2	0		4.13152
355	0	1527.2	13955.2	0		4.61509
356	0	1607.2	13955.2	0		4.24745
357	0	1687.2	13955.2	0		5.04961
358	0	1767.2	13955.2	0		5.16559
359	0	1847.2	13955.2	0		4.30595
360	0	1927.2	13955.2	0		4.42862
361	0	2007.2	13955.2	0		4.86922
362	0	2087.2	13955.2	0		4.76321
363	0	2167.2	13955.2	0		4.36858
364	0	2247.2	13955.2	0		4.51241
365	0	2327.2	13955.2	0		4.58698
366	0	2407.2	13955.2	0		4.52367
367	0	2487.2	13955.2	0		4.28398
368	0	2567.2	13955.2	0		4.4337
369	0	2647.2	13955.2	0		4.32268
370	0	2727.2	13955.2	0		4.26306
371	0	2807.2	13955.2	0		4.36477
372	0	2887.2	13955.2	0		4.21858
373	0	2967.2	13955.2	0		4.05229
374	0	3047.2	13955.2	0		4.36858
375	0	3127.2	13955.2	0		4.58119
376	0	3207.2	13955.2	0		4.16496
377	0	3287.2	13955.2	0		4.53167
378	0	3367.2	13955.2	0		4.58137
379	0	3447.2	13955.2	0		4.36946
380	0	3527.2	13955.2	0		4.57326
381	0	3607.2	13955.2	0		4.89536
382	0	3687.2	13955.2	0		5.54949
383	0	3767.2	13955.2	0		4.47671
384	0	3847.2	13955.2	0		5.24109
385	0	247.2	13875.2	0		4.04227
386	0	327.2	13875.2	0		3.79553
387	0	407.2	13875.2	0		3.98007
388	0	487.2	13875.2	0		3.95745
389	0	567.2	13875.2	0		3.82426
390	0	647.2	13875.2	0		3.67149
391	0	727.2	13875.2	0		3.82643
392	0	807.2	13875.2	0		3.79341
393	0	887.2	13875.2	0		4.32452
394	0	967.2	13875.2	0		3.96468
395	0	1047.2	13875.2	0		4.57588
396	0	1127.2	13875.2	0		4.32701
397	0	1207.2	13875.2	0		4.73351
398	0	1287.2	13875.2	0		4.18982
399	0	1367.2	13875.2	0		4.25305
400	0	1447.2	13875.2	0		5.64693
401	0	1527.2	13875.2	0		5.47197
402	0	1607.2	13875.2	0		4.67078
403	0	1687.2	13875.2	0		5.51712
404	0	1767.2	13875.2	0		5.20455
405	0	1847.2	13875.2	0		4.86337
406	0	1927.2	13875.2	0		5.11063
407	0	2007.2	13875.2	0		4.82256
408	0	2087.2	13875.2	0		5.21344
409	0	2167.2	13875.2	0		4.75414
410	0	2247.2	13875.2	0		4.36529
411	0	2327.2	13875.2	0		5.04894
412	0	2407.2	13875.2	0		4.54424
413	0	2487.2	13875.2	0		4.9897
414	0	2567.2	13875.2	0		4.9451
415	0	2647.2	13875.2	0		4.76754
416	0	2727.2	13875.2	0		4.64741
417	0	2807.2	13875.2	0		4.36425
418	0	2887.2	13875.2	0		4.44725
419	0	2967.2	13875.2	0		4.29178
420	0	3047.2	13875.2	0		4.25537
421	0	3127.2	13875.2	0		4.32849
422	0	3207.2	13875.2	0		4.09139
423	0	3287.2	13875.2	0		4.23927
424	0	3367.2	13875.2	0		4.30268
425	0	3447.2	13875.2	0		5.29482
426	0	3527.2	13875.2	0		4.35811
427	0	3607.2	13875.2	0		4.84586
428	0	3687.2	13875.2	0		5.26882
429	0	3767.2	13875.2	0		5.4364
430	0	3847.2	13875.2	0		6.23316
431	0	247.2	13795.2	0		4.12365
432	0	327.2	13795.2	0		3.83026
433	0	407.2	13795.2	0		4.15174
434	0	487.2	13795.2	0		3.65169
435	0	567.2	13795.2	0		3.92935
436	0	647.2	13795.2	0		4.00264
437	0	727.2	13795.2	0		3.76139
438	0	807.2	13795.2	0		3.80635
439	0	887.2	13795.2	0		4.71358
440	0	967.2	13795.2	0		4.17488
441	0	1047.2	13795.2	0		4.59773
442	0	1127.2	13795.2	0		4.14243
443	0	1207.2	13795.2	0		4.35918
444	0	1287.2	13795.2	0		4.22876
445	0	1367.2	13795.2	0		4.35652
446	0	1447.2	13795.2	0		5.16173
447	0	1527.2	13795.2	0		4.62812
448	0	1607.2	13795.2	0		5.0644
449	0	1687.2	13795.2	0		4.3436
450	0	1767.2	13795.2	0		4.79984
451	0	1847.2	13795.2	0		4.52468
452	0	1927.2	13795.2	0		4.83316
453	0	2007.2	13795.2	0		4.71683
454	0	2087.2	13795.2	0		4.75197
455	0	2167.2	13795.2	0		4.86575
456	0	2247.2	13795.2	0		4.89193
457	0	2327.2	13795.2	0		4.9141
458	0	2407.2	13795.2	0		4.41031
459	0	2487.2	13795.2	0		4.65439
460	0	2567.2	13795.2	0		4.66382
461	0	2647.2	13795.2	0		4.15784
462	0	2727.2	13795.2	0		4.23732
463	0	2807.2	13795.2	0		4.48211
464	0	2887.2	13795.2	0		4.81142
465	0	2967.2	13795.2	0		4.61943
466	0	3047.2	13795.2	0		4.39357
467	0	3127.2	13795.2	0		4.38695
468	0	3207.2	13795.2	0		4.57773
469	0	3287.2	13795.2	0		4.51444
470	0	3367.2	13795.2	0		4.50883
471	0	3447.2	13795.2	0		4.48013
472	0	3527.2	13795.2	0		4.41064
473	0	3607.2	13795.2	0		4.66248
474	0	3687.2	13795.2	0		5.56883
475	0	3767.2	13795.2	0		5.08202
476	0	3847.2	13795.2	0		5.46811
477	0	3927.2	13795.2	0		5.66807
478	0	247.2	13715.2	0		3.91179
479	0	327.2	13715.2	0		4.307
480	0	407.2	13715.2	0		3.88635
481	0	487.2	13715.2	0		3.87419
482	0	567.2	13715.2	0		4.03308
483	0	647.2	13715.2	0		4.07901
484	0	727.2	13715.2	0		3.75794
485	0	807.2	13715.2	0		4.01568
486	0	887.2	13715.2	0		3.82506
487	0	967.2	13715.2	0		4.39551
488	0	1047.2	13715.2	0		4.02871
489	0	1127.2	13715.2	0		4.17825
490	0	1207.2	13715.2	0		4.22707
491	0	1287.2	13715.2	0		4.41305
492	0	1367.2	13715.2	0		3.74838
493	0	1447.2	13715.2	0		4.31696
494	0	1527.2	13715.2	0		4.82486
495	0	1607.2	13715.2	0		4.73342
496	0	1687.2	13715.2	0		5.24873
497	0	1767.2	13715.2	0		5.08664
498	0	1847.2	13715.2	0		4.64427
499	0	1927.2	13715.2	0		4.71099
500	0	2007.2	13715.2	0		4.6362
501	0	2087.2	13715.2	0		4.9343
502	0	2167.2	13715.2	0		4.84362
503	0	2247.2	13715.2	0		4.70935
504	0	2327.2	13715.2	0		4.96939
505	0	2407.2	13715.2	0		4.5476
506	0	2487.2	13715.2	0		4.30239
507	0	2567.2	13715.2	0		4.71022
508	0	2647.2	13715.2	0		4.86218
509	0	2727.2	13715.2	0		4.42611
510	0	2807.2	13715.2	0		4.70675
511	0	2887.2	13715.2	0		4.70013
512	0	2967.2	13715.2	0		4.6004
513	0	3047.2	13715.2	0		5.02832
514	0	3127.2	13715.2	0		4.44276
515	0	3207.2	13715.2	0		4.50281
516	0	3287.2	13715.2	0		4.65796
517	0	3367.2	13715.2	0		4.43403
518	0	3447.2	13715.2	0		4.61871
519	0	3527.2	13715.2	0		4.47704
520	0	3607.2	13715.2	0		4.86771
521	0	3687.2	13715.2	0		4.65426
522	0	3767.2	13715.2	0		5.17007
523	0	3847.2	13715.2	0		5.28254
524	0	3927.2	13715.2	0		5.23622
525	0	247.2	13635.2	0		3.7567
526	0	327.2	13635.2	0		4.03966
527	0	407.2	13635.2	0		4.26739
528	0	487.2	13635.2	0		3.28361
529	0	567.2	13635.2	0		3.51004
530	0	647.2	13635.2	0		3.57923
531	0	727.2	13635.2	0		3.70415
532	0	807.2	13635.2	0		3.72696
533	0	887.2	13635.2	0		3.83819
534	0	967.2	13635.2	0		3.55693
535	0	1047.2	13635.2	0		4.29507
536	0	1127.2	13635.2	0		3.61725
537	0	1207.2	13635.2	0		4.48576
538	0	1287.2	13635.2	0		4.35736
539	0	1367.2	13635.2	0		4.34405
540	0	1447.2	13635.2	0		4.92439
541	0	1527.2	13635.2	0		4.75096
542	0	1607.2	13635.2	0		4.98262
543	0	1687.2	13635.2	0		4.60196
544	0	1767.2	13635.2	0		5.10704
545	0	1847.2	13635.2	0		4.37229
546	0	1927.2	13635.2	0		4.85253
547	0	2007.2	13635.2	0		4.37395
548	0	2087.2	13635.2	0		4.53727
549	0	2167.2	13635.2	0		4.43819
550	0	2247.2	13635.2	0		4.39208
551	0	2327.2	13635.2	0		4.28189
552	0	2407.2	13635.2	0		4.64186
553	0	2487.2	13635.2	0		5.03108
554	0	2567.2	13635.2	0		4.81309
555	0	2647.2	13635.2	0		4.33113
556	0	2727.2	13635.2	0		4.46052
557	0	2807.2	13635.2	0		4.97027
558	0	2887.2	13635.2	0		4.84463
559	0	2967.2	13635.2	0		4.52243
560	0	3047.2	13635.2	0		4.53108
561	0	3127.2	13635.2	0		4.35907
562	0	3207.2	13635.2	0		4.83648
563	0	3287.2	13635.2	0		4.28152
564	0	3367.2	13635.2	0		4.44338
565	0	3447.2	13635.2	0		4.24604
566	0	3527.2	13635.2	0		4.76548
567	0	3607.2	13635.2	0		4.79715
568	0	3687.2	13635.2	0		5.00281
569	0	3767.2	13635.2	0		4.41247
570	0	3847.2	13635.2	0		4.71646
571	0	3927.2	13635.2	0		4.87197
572	0	4007.2	13635.2	0		4.88275
573	0	4087.2	13635.2	0		4.31734
574	0	247.2	13555.2	0		3.71285
575	0	327.2	13555.2	0		3.49297
576	0	407.2	13555.2	0		3.27141
577	0	487.2	13555.2	0		3.57488
578	0	567.2	13555.2	0		3.64859
579	0	647.2	13555.2	0		3.92853
580	0	727.2	13555.2	0		3.81654
581	0	807.2	13555.2	0		4.46622
582	0	887.2	13555.2	0		3.93034
583	0	967.2	13555.2	0		3.80038
584	0	1047.2	13555.2	0		3.67916
585	0	1127.2	13555.2	0		4.40151
586	0	1207.2	13555.2	0		4.48982
587	0	1287.2	13555.2	0		4.281
588	0	1367.2	13555.2	0		4.32293
589	0	1447.2	13555.2	0		4.8799
590	0	1527.2	13555.2	0		4.33366
591	0	1607.2	13555.2	0		4.50583
592	0	1687.2	13555.2	0		4.58847
593	0	1767.2	13555.2	0		5.14679
594	0	1847.2	13555.2	0		5.07955
595	0	1927.2	13555.2	0		4.46075
596	0	2007.2	13555.2	0		4.17885
597	0	2087.2	13555.2	0		4.32358
598	0	2167.2	13555.2	0		4.82444
599	0	2247.2	13555.2	0		4.72141
600	0	2327.2	13555.2	0		4.5479
601	0	2407.2	13555.2	0		4.36382
602	0	2487.2	13555.2	0		4.51793
603	0	2567.2	13555.2	0		4.55335
604	0	2647.2	13555.2	0		4.73796
605	0	2727.2	13555.2	0		4.58768
606	0	2807.2	13555.2	0		4.17831
607	0	2887.2	13555.2	0		3.98429
608	0	2967.2	13555.2	0		4.62544
609	0	3047.2	13555.2	0		4.823
610	0	3127.2	13555.2	0		4.7568
611	0	3207.2	13555.2	0		4.36876
612	0	3287.2	13555.2	0		4.36488
613	0	3367.2	13555.2	0		4.69438
614	0	3447.2	13555.2	0		4.49473
615	0	3527.2	13555.2	0		4.67089
616	0	3607.2	13555.2	0		4.4581
617	0	3687.2	13555.2	0		4.97154
618	0	3767.2	13555.2	0		4.35488
619	0	3847.2	13555.2	0		5.1682
620	0	3927.2	13555.2	0		4.66286
621	0	4007.2	13555.2	0		4.86236
622	0	4087.2	13555.2	0		5.4281
623	0	4167.2	13555.2	0		5.51171
624	0	4247.2	13555.2	0		4.97619
625	0	4327.2	13555.2	0		3.81597
626	0	247.2	13475.2	0		3.28816
627	0	327.2	13475.2	0		3.6452
628	0	407.2	13475.2	0		3.04837
629	0	487.2	13475.2	0		3.64104
630	0	567.2	13475.2	0		3.22523
631	0	647.2	13475.2	0		3.61858
632	0	727.2	13475.2	0		3.6821
633	0	807.2	13475.2	0		3.53188
634	0	887.2	13475.2	0		3.55597
635	0	967.2	13475.2	0		3.69496
636	0	1047.2	13475.2	0		3.89107
637	0	1127.2	13475.2	0		3.96548
638	0	1207.2	13475.2	0		4.5264
639	0	1287.2	13475.2	0		4.89632
640	0	1367.2	13475.2	0		4.04243
641	0	1447.2	13475.2	0		4.48176
642	0	1527.2	13475.2	0		4.747
643	0	1607.2	13475.2	0		4.41589
644	0	1687.2	13475.2	0		4.64871
645	0	1767.2	13475.2	0		4.25585
646	0	1847.2	13475.2	0		5.21684
647	0	1927.2	13475.2	0		4.65544
648	0	2007.2	13475.2	0		4.3994
649	0	2087.2	13475.2	0		4.13422
650	0	2167.2	13475.2	0		4.80663
651	0	2247.2	13475.2	0		4.15599
652	0	2327.2	13475.2	0		4.37367
653	0	2407.2	13475.2	0		4.27112
654	0	2487.2	13475.2	0		4.35466
655	0	2567.2	13475.2	0		4.85727
656	0	2647.2	13475.2	0		4.25468
657	0	2727.2	13475.2	0		4.83598
658	0	2807.2	13475.2	0		4.23673
659	0	2887.2	13475.2	0		4.56862
660	0	2967.2	13475.2	0		5.00562
661	0	3047.2	13475.2	0		4.91205
662	0	3127.2	13475.2	0		4.81939
663	0	3207.2	13475.2	0		4.44981
664	0	3287.2	13475.2	0		4.06878
665	0	3367.2	13475.2	0		4.23986
666	0	3447.2	13475.2	0		4.24171
667	0	3527.2	13475.2	0		4.65074
668	0	3607.2	13475.2	0		4.65174
669	0	3687.2	13475.2	0		4.70443
670	0	3767.2	13475.2	0		4.64617
671	0	3847.2	13475.2	0		4.63545
672	0	3927.2	13475.2	0		4.7488
673	0	4007.2	13475.2	0		5.09031
674	0	4087.2	13475.2	0		5.2482
675	0	4167.2	13475.2	0		4.87613
676	0	4247.2	13475.2	0		5.06705
677	0	4327.2	13475.2	0		5.9899
678	0	247.2	13395.2	0		3.36088
679	0	327.2	13395.2	0		3.25757
680	0	407.2	13395.2	0		3.1939
681	0	487.2	13395.2	0		3.25112
682	0	567.2	13395.2	0		3.38694
683	0	647.2	13395.2	0		3.73021
684	0	727.2	13395.2	0		3.34332
685	0	807.2	13395.2	0		4.07046
686	0	887.2	13395.2	0		3.61571
687	0	967.2	13395.2	0		3.86883
688	0	1047.2	13395.2	0		4.09055
689	0	1127.2	13395.2	0		3.97154
690	0	1207.2	13395.2	0		4.32897
691	0	1287.2	13395.2	0		4.48597
692	0	1367.2	13395.2	0		4.38481
693	0	1447.2	13395.2	0		4.44266
694	0	1527.2	13395.2	0		3.99699
695	0	1607.2	13395.2	0		4.06974
696	0	1687.2	13395.2	0		4.71325
697	0	1767.2	13395.2	0		4.63476
698	0	1847.2	13395.2	0		4.255
699	0	1927.2	13395.2	0		4.22765
700	0	2007.2	13395.2	0		4.40834
701	0	2087.2	13395.2	0		4.47686
702	0	2167.2	13395.2	0		4.0574
703	0	2247.2	13395.2	0		4.32855
704	0	2327.2	13395.2	0		4.33226
705	0	2407.2	13395.2	0		4.54385
706	0	2487.2	13395.2	0		4.89735
707	0	2567.2	13395.2	0		4.44067
708	0	2647.2	13395.2	0		4.41779
709	0	2727.2	13395.2	0		4.57714
710	0	2807.2	13395.2	0		4.51691
711	0	2887.2	13395.2	0		4.66511
712	0	2967.2	13395.2	0		5.07306
713	0	3047.2	13395.2	0		4.23921
714	0	3127.2	13395.2	0		4.86498
715	0	3207.2	13395.2	0		4.79167
716	0	3287.2	13395.2	0		4.88884
717	0	3367.2	13395.2	0		4.75167
718	0	3447.2	13395.2	0		4.54599
719	0	3527.2	13395.2	0		5.05244
720	0	3607.2	13395.2	0		4.87254
721	0	3687.2	13395.2	0		4.7434
722	0	3767.2	13395.2	0		4.56868
723	0	3847.2	13395.2	0		4.80941
724	0	3927.2	13395.2	0		4.77088
725	0	4007.2	13395.2	0		5.07429
726	0	4087.2	13395.2	0		4.70909
727	0	4167.2	13395.2	0		4.48478
728	0	4247.2	13395.2	0		5.35416
729	0	4327.2	13395.2	0		5.36486
730	0	247.2	13315.2	0		2.62108
731	0	327.2	13315.2	0		2.96498
732	0	407.2	13315.2	0		3.07144
733	0	487.2	13315.2	0		2.97939
734	0	567.2	13315.2	0		2.74432
735	0	647.2	13315.2	0		2.96744
736	0	727.2	13315.2	0		3.07608
737	0	807.2	13315.2	0		3.51307
738	0	887.2	13315.2	0		3.61292
739	0	967.2	13315.2	0		3.73829
740	0	1047.2	13315.2	0		4.04164
741	0	1127.2	13315.2	0		3.89179
742	0	1207.2	13315.2	0		4.38425
743	0	1287.2	13315.2	0		4.17772
744	0	1367.2	13315.2	0		4.33553
745	0	1447.2	13315.2	0		4.301
746	0	1527.2	13315.2	0		4.34244
747	0	1607.2	13315.2	0		4.28165
748	0	1687.2	13315.2	0		4.42551
749	0	1767.2	13315.2	0		4.67329
750	0	1847.2	13315.2	0		4.77413
751	0	1927.2	13315.2	0		4.35775
752	0	2007.2	13315.2	0		4.54177
753	0	2087.2	13315.2	0		4.34933
754	0	2167.2	13315.2	0		4.38213
755	0	2247.2	13315.2	0		3.96804
756	0	2327.2	13315.2	0		4.61618
757	0	2407.2	13315.2	0		3.79398
758	0	2487.2	13315.2	0		4.68226
759	0	2567.2	13315.2	0		4.25605
760	0	2647.2	13315.2	0		4.68472
761	0	2727.2	13315.2	0		4.68037
762	0	2807.2	13315.2	0		4.98841
763	0	2887.2	13315.2	0		4.39629
764	0	2967.2	13315.2	0		4.93209
765	0	3047.2	13315.2	0		4.7633
766	0	3127.2	13315.2	0		4.72555
767	0	3207.2	13315.2	0		4.35837
768	0	3287.2	13315.2	0		4.48106
769	0	3367.2	13315.2	0		4.59341
770	0	3447.2	13315.2	0		4.51451
771	0	3527.2	13315.2	0		4.47793
772	0	3607.2	13315.2	0		4.51386
773	0	3687.2	13315.2	0		4.89777
774	0	3767.2	13315.2	0		4.91621
775	0	3847.2	13315.2	0		4.78179
776	0	3927.2	13315.2	0		4.87456
777	0	4007.2	13315.2	0		5.09824
778	0	4087.2	13315.2	0		4.95301
779	0	4167.2	13315.2	0		4.6299
780	0	4247.2	13315.2	0		5.30176
781	0	4327.2	13315.2	0		5.22283
782	0	247.2	13235.2	0		2.23056
783	0	327.2	13235.2	0		2.24
784	0	407.2	13235.2	0		2.65516
785	0	487.2	13235.2	0		2.8747
786	0	567.2	13235.2	0		2.77627
787	0	647.2	13235.2	0		3.22111
788	0	727.2	13235.2	0		3.07744
789	0	807.2	13235.2	0		3.17678
790	0	887.2	13235.2	0		3.29127
791	0	967.2	13235.2	0		3.44558
792	0	1047.2	13235.2	0		3.69046
793	0	1127.2	13235.2	0		4.23273
794	0	1207.2	13235.2	0		4.29288
795	0	1287.2	13235.2	0		4.38407
796	0	1367.2	13235.2	0		4.09666
797	0	1447.2	13235.2	0		5.17203
798	0	1527.2	13235.2	0		4.73362
799	0	1607.2	13235.2	0		4.20841
800	0	1687.2	13235.2	0		4.55644
801	0	1767.2	13235.2	0		3.93195
802	0	1847.2	13235.2	0		4.20477
803	0	1927.2	13235.2	0		3.98659
804	0	2007.2	13235.2	0		4.39035
805	0	2087.2	13235.2	0		4.10912
806	0	2167.2	13235.2	0		3.93593
807	0	2247.2	13235.2	0		4.19319
808	0	2327.2	13235.2	0		4.16969
809	0	2407.2	13235.2	0		4.45915
810	0	2487.2	13235.2	0		4.47623
811	0	2567.2	13235.2	0		4.47068
812	0	2647.2	13235.2	0		3.94128
813	0	2727.2	13235.2	0		4.69163
814	0	2807.2	13235.2	0		4.56277
815	0	2887.2	13235.2	0		4.29812
816	0	2967.2	13235.2	0		4.4751
817	0	3047.2	13235.2	0		4.6637
818	0	3127.2	13235.2	0		4.3632
819	0	3207.2	13235.2	0		4.58783
820	0	3287.2	13235.2	0		4.5453
821	0	3367.2	13235.2	0		4.34362
822	0	3447.2	13235.2	0		5.14597
823	0	3527.2	13235.2	0		4.71051
824	0	3607.2	13235.2	0		4.72472
825	0	3687.2	13235.2	0		4.14348
826	0	3767.2	13235.2	0		4.7797
827	0	3847.2	13235.2	0		4.17311
828	0	3927.2	13235.2	0		4.84501
829	0	4007.2	13235.2	0		4.95674
830	0	4087.2	13235.2	0		4.66896
831	0	4167.2	13235.2	0		5.13725
832	0	4247.2	13235.2	0		4.67219
833	0	4327.2	13235.2	0		5.1901
834	0	247.2	13155.2	0		1.84782
835	0	327.2	13155.2	0		2.44152
836	0	407.2	13155.2	0		2.41818
837	0	487.2	13155.2	0		2.86614
838	0	567.2	13155.2	0		2.78291
839	0	647.2	13155.2	0		2.80405
840	0	727.2	13155.2	0		3.13481
841	0	807.2	13155.2	0		3.27006
842	0	887.2	13155.2	0		3.30455
843	0	967.2	13155.2	0		3.70681
844	0	1047.2	13155.2	0		3.74482
845	0	1127.2	13155.2	0		3.87947
846	0	1207.2	13155.2	0		4.20084
847	0	1287.2	13155.2	0		3.89425
848	0	1367.2	13155.2	0		4.21484
849	0	1447.2	13155.2	0		4.65548
850	0	1527.2	13155.2	0		4.3302
851	0	1607.2	13155.2	0		4.54852
852	0	1687.2	13155.2	0		4.87483
853	0	1767.2	13155.2	0		4.57442
854	0	1847.2	13155.2	0		4.04475
855	0	1927.2	13155.2	0		4.32612
856	0	2007.2	13155.2	0		4.47424
857	0	2087.2	13155.2	0		4.17152
858	0	2167.2	13155.2	0		4.28725
859	0	2247.2	13155.2	0		4.7126
860	0	2327.2	13155.2	0		4.17116
861	0	2407.2	13155.2	0		4.31388
862	0	2487.2	13155.2	0		4.189
863	0	2567.2	13155.2	0		3.9781
864	0	2647.2	13155.2	0		4.08605
865	0	2727.2	13155.2	0		4.63817
866	0	2807.2	13155.2	0		4.6451
867	0	2887.2	13155.2	0		4.45736
868	0	2967.2	13155.2	0		4.75353
869	0	3047.2	13155.2	0		4.63168
870	0	3127.2	13155.2	0		4.02477
871	0	3207.2	13155.2	0		4.88118
872	0	3287.2	13155.2	0		4.27236
873	0	3367.2	13155.2	0		4.69741
874	0	3447.2	13155.2	0		5.43378
875	0	3527.2	13155.2	0		5.07096
876	0	3607.2	13155.2	0		4.67654
877	0	3687.2	13155.2	0		4.70047
878	0	3767.2	13155.2	0		4.96544
879	0	3847.2	13155.2	0		4.36836
880	0	3927.2	13155.2	0		4.54375
881	0	4007.2	13155.2	0		4.80465
882	0	4087.2	13155.2	0		4.96747
883	0	4167.2	13155.2	0		4.67541
884	0	4247.2	13155.2	0		5.42741
885	0	4327.2	13155.2	0		4.71961
886	0	247.2	13075.2	0		2.31321
887	0	327.2	13075.2	0		2.24967
888	0	407.2	13075.2	0		2.5723
889	0	487.2	13075.2	0		2.3955
890	0	567.2	13075.2	0		2.50395
891	0	647.2	13075.2	0		2.92441
892	0	727.2	13075.2	0		3.11766
893	0	807.2	13075.2	0		3.15067
894	0	887.2	13075.2	0		3.23878
895	0	967.2	13075.2	0		3.74767
896	0	1047.2	13075.2	0		3.52595
897	0	1127.2	13075.2	0		4.56201
898	0	1207.2	13075.2	0		3.40639
899	0	1287.2	13075.2	0		3.65155
900	0	1367.2	13075.2	0		4.49937
901	0	1447.2	13075.2	0		4.2847
902	0	1527.2	13075.2	0		3.94393
903	0	1607.2	13075.2	0		4.32911
904	0	1687.2	13075.2	0		4.38672
905	0	1767.2	13075.2	0		4.13654
906	0	1847.2	13075.2	0		3.95312
907	0	1927.2	13075.2	0		4.00083
908	0	2007.2	13075.2	0		4.24914
909	0	2087.2	13075.2	0		4.00081
910	0	2167.2	13075.2	0		4.04625
911	0	2247.2	13075.2	0		3.87697
912	0	2327.2	13075.2	0		4.15894
913	0	2407.2	13075.2	0		3.95153
914	0	2487.2	13075.2	0		3.81584
915	0	2567.2	13075.2	0		4.39752
916	0	2647.2	13075.2	0		3.95205
917	0	2727.2	13075.2	0		4.13792
918	0	2807.2	13075.2	0		4.32161
919	0	2887.2	13075.2	0		4.76979
920	0	2967.2	13075.2	0		4.46179
921	0	3047.2	13075.2	0		4.40143
922	0	3127.2	13075.2	0		4.59474
923	0	3207.2	13075.2	0		4.46227
924	0	3287.2	13075.2	0		4.33304
925	0	3367.2	13075.2	0		4.91259
926	0	3447.2	13075.2	0		4.92433
927	0	3527.2	13075.2	0		4.13047
928	0	3607.2	13075.2	0		4.20872
929	0	3687.2	13075.2	0		5.17938
930	0	3767.2	13075.2	0		4.55955
931	0	3847.2	13075.2	0		4.65731
932	0	3927.2	13075.2	0		4.84222
933	0	4007.2	13075.2	0		4.91876
934	0	4087.2	13075.2	0		4.67838
935	0	4167.2	13075.2	0		4.9355
936	0	4247.2	13075.2	0		4.59715
937	0	4327.2	13075.2	0		5.24813
938	0	167.2	12995.2	0		2.93354
939	0	247.2	12995.2	0		2.50105
940	0	327.2	12995.2	0		2.21642
941	0	407.2	12995.2	0		2.39141
942	0	487.2	12995.2	0		2.66215
943	0	567.2	12995.2	0		2.51272
944	0	647.2	12995.2	0		3.01659
945	0	727.2	12995.2	0		2.80574
946	0	807.2	12995.2	0		3.09976
947	0	887.2	12995.2	0		3.55415
948	0	967.2	12995.2	0		3.76062
949	0	1047.2	12995.2	0		4.19117
950	0	1127.2	12995.2	0		3.95079
951	0	1207.2	12995.2	0		3.58586
952	0	1287.2	12995.2	0		4.2566
953	0	1367.2	12995.2	0		4.13777
954	0	1447.2	12995.2	0		4.51625
955	0	1527.2	12995.2	0		4.36263
956	0	1607.2	12995.2	0		4.54282
957	0	1687.2	12995.2	0		4.58667
958	0	1767.2	12995.2	0		4.47199
959	0	1847.2	12995.2	0		4.19569
960	0	1927.2	12995.2	0		4.10354
961	0	2007.2	12995.2	0		4.0518
962	0	2087.2	12995.2	0		3.73038
963	0	2167.2	12995.2	0		4.09989
964	0	2247.2	12995.2	0		4.00544
965	0	2327.2	12995.2	0		4.20882
966	0	2407.2	12995.2	0		4.27777
967	0	2487.2	12995.2	0		4.3813
968	0	2567.2	12995.2	0		4.03616
969	0	2647.2	12995.2	0		4.18216
970	0	2727.2	12995.2	0		4.35574
971	0	2807.2	12995.2	0		4.15427
972	0	2887.2	12995.2	0		4.01902
973	0	2967.2	12995.2	0		4.4358
974	0	3047.2	12995.2	0		4.2019
975	0	3127.2	12995.2	0		4.41198
976	0	3207.2	12995.2	0		4.46541
977	0	3287.2	12995.2	0		4.7735
978	0	3367.2	12995.2	0		4.72367
979	0	3447.2	12995.2	0		4.18826
980	0	3527.2	12995.2	0		4.70009
981	0	3607.2	12995.2	0		4.65229
982	0	3687.2	12995.2	0		4.66803
983	0	3767.2	12995.2	0		4.37661
984	0	3847.2	12995.2	0		4.74894
985	0	3927.2	12995.2	0		4.78354
986	0	4007.2	12995.2	0		4.49894
987	0	4087.2	12995.2	0		4.54334
988	0	4167.2	12995.2	0		4.55526
989	0	4247.2	12995.2	0		4.55522
990	0	4327.2	12995.2	0		5.38054
991	0	167.2	12915.2	0		2.22028
992	0	247.2	12915.2	0		2.25661
993	0	327.2	12915.2	0		2.90177
994	0	407.2	12915.2	0		2.37732
995	0	487.2	12915.2	0		2.55258
996	0	567.2	12915.2	0		2.75763
997	0	647.2	12915.2	0		2.75506
998	0	727.2	12915.2	0		3.04845
999	0	807.2	12915.2	0		3.06532
1000	0	887.2	12915.2	0		3.27591
1001	0	967.2	12915.2	0		3.46942
1002	0	1047.2	12915.2	0		3.52438
1003	0	1127.2	12915.2	0		3.57193
1004	0	1207.2	12915.2	0		4.17073
1005	0	1287.2	12915.2	0		3.96862
1006	0	1367.2	12915.2	0		4.15114
1007	0	1447.2	12915.2	0		4.53778
1008	0	1527.2	12915.2	0		4.03168
1009	0	1607.2	12915.2	0		4.43834
1010	0	1687.2	12915.2	0		4.75268
1011	0	1767.2	12915.2	0		4.10403
1012	0	1847.2	12915.2	0		4.05104
1013	0	1927.2	12915.2	0		4.16103
1014	0	2007.2	12915.2	0		3.92884
1015	0	2087.2	12915.2	0		3.83242
1016	0	2167.2	12915.2	0		4.42159
1017	0	2247.2	12915.2	0		4.10563
1018	0	2327.2	12915.2	0		4.24001
1019	0	2407.2	12915.2	0		4.3967
1020	0	2487.2	12915.2	0		4.69004
1021	0	2567.2	12915.2	0		4.0544
1022	0	2647.2	12915.2	0		3.81785
1023	0	2727.2	12915.2	0		4.24745
1024	0	2807.2	12915.2	0		4.28844
1025	0	2887.2	12915.2	0		4.30964
1026	0	2967.2	12915.2	0		4.45851
1027	0	3047.2	12915.2	0		4.15775
1028	0	3127.2	12915.2	0		4.25426
1029	0	3207.2	12915.2	0		4.46258
1030	0	3287.2	12915.2	0		5.19808
1031	0	3367.2	12915.2	0		4.32917
1032	0	3447.2	12915.2	0		4.48232
1033	0	3527.2	12915.2	0		4.75044
1034	0	3607.2	12915.2	0		4.61507
1035	0	3687.2	12915.2	0		4.73025
1036	0	3767.2	12915.2	0		5.39105
1037	0	3847.2	12915.2	0		4.95444
1038	0	3927.2	12915.2	0		4.44665
1039	0	4007.2	12915.2	0		5.21867
1040	0	4087.2	12915.2	0		5.06176
1041	0	4167.2	12915.2	0		5.32747
1042	0	4247.2	12915.2	0		4.71452
1043	0	4327.2	12915.2	0		4.88952
1044	0	4407.2	12915.2	0		5.47844
1045	0	4487.2	12915.2	0		4.70952
1046	0	167.2	12835.2	0		2.63409
1047	0	247.2	12835.2	0		2.36379
1048	0	327.2	12835.2	0		2.44816
1049	0	407.2	12835.2	0		2.59381
1050	0	487.2	12835.2	0		2.74607
1051	0	567.2	12835.2	0		2.98732
1052	0	647.2	12835.2	0		3.23271
1053	0	727.2	12835.2	0		3.03241
1054	0	807.2	12835.2	0		3.70756
1055	0	887.2	12835.2	0		3.50657
1056	0	967.2	12835.2	0		3.65707
1057	0	1047.2	12835.2	0		3.59723
1058	0	1127.2	12835.2	0		3.76227
1059	0	1207.2	12835.2	0		3.91926
1060	0	1287.2	12835.2	0		3.93983
1061	0	1367.2	12835.2	0		3.89078
1062	0	1447.2	12835.2	0		4.57991
1063	0	1527.2	12835.2	0		4.69713
1064	0	1607.2	12835.2	0		4.17029
1065	0	1687.2	12835.2	0		4.19877
1066	0	1767.2	12835.2	0		3.93079
1067	0	1847.2	12835.2	0		4.02183
1068	0	1927.2	12835.2	0		3.90284
1069	0	2007.2	12835.2	0		4.11647
1070	0	2087.2	12835.2	0		4.31723
1071	0	2167.2	12835.2	0		3.65539
1072	0	2247.2	12835.2	0		3.72689
1073	0	2327.2	12835.2	0		3.89002
1074	0	2407.2	12835.2	0		3.6573
1075	0	2487.2	12835.2	0		4.08118
1076	0	2567.2	12835.2	0		4.58399
1077	0	2647.2	12835.2	0		4.23285
1078	0	2727.2	12835.2	0		3.81356
1079	0	2807.2	12835.2	0		4.85595
1080	0	2887.2	12835.2	0		4.31662
1081	0	2967.2	12835.2	0		4.54685
1082	0	3047.2	12835.2	0		4.24852
1083	0	3127.2	12835.2	0		4.39307
1084	0	3207.2	12835.2	0		4.43563
1085	0	3287.2	12835.2	0		4.6441
1086	0	3367.2	12835.2	0		4.21871
1087	0	3447.2	12835.2	0		4.86178
1088	0	3527.2	12835.2	0		4.56894
1089	0	3607.2	12835.2	0		4.82091
1090	0	3687.2	12835.2	0		4.24227
1091	0	3767.2	12835.2	0		4.82353
1092	0	3847.2	12835.2	0		4.58451
1093	0	3927.2	12835.2	0		4.42342
1094	0	4007.2	12835.2	0		4.6344
1095	0	4087.2	12835.2	0		4.70652
1096	0	4167.2	12835.2	0		4.84402
1097	0	4247.2	12835.2	0		4.77375
1098	0	4327.2	12835.2	0		5.14104
1099	0	4407.2	12835.2	0		5.50556
1100	0	4487.2	12835.2	0		5.64515
1101	0	167.2	12755.2	0		2.715
1102	0	247.2	12755.2	0		2.91561
1103	0	327.2	12755.2	0		2.72244
1104	0	407.2	12755.2	0		2.84969
1105	0	487.2	12755.2	0		2.63579
1106	0	567.2	12755.2	0		2.84564
1107	0	647.2	12755.2	0		3.02893
1108	0	727.2	12755.2	0		3.37093
1109	0	807.2	12755.2	0		3.99115
1110	0	887.2	12755.2	0		3.28284
1111	0	967.2	12755.2	0		3.54527
1112	0	1047.2	12755.2	0		3.65711
1113	0	1127.2	12755.2	0		3.86347
1114	0	1207.2	12755.2	0		3.90844
1115	0	1287.2	12755.2	0		3.90615
1116	0	1367.2	12755.2	0		3.8207
1117	0	1447.2	12755.2	0		4.01196
1118	0	1527.2	12755.2	0		3.42249
1119	0	1607.2	12755.2	0		3.98002
1120	0	1687.2	12755.2	0		3.8901
1121	0	1767.2	12755.2	0		4.23128
1122	0	1847.2	12755.2	0		4.13433
1123	0	1927.2	12755.2	0		3.4208
1124	0	2007.2	12755.2	0		3.95557
1125	0	2087.2	12755.2	0		3.93678
1126	0	2167.2	12755.2	0		3.9681
1127	0	2247.2	12755.2	0		3.81524
1128	0	2327.2	12755.2	0		3.92192
1129	0	2407.2	12755.2	0		3.97191
1130	0	2487.2	12755.2	0		3.87896
1131	0	2567.2	12755.2	0		4.33833
1132	0	2647.2	12755.2	0		3.92566
1133	0	2727.2	12755.2	0		3.76669
1134	0	2807.2	12755.2	0		3.85753
1135	0	2887.2	12755.2	0		4.54659
1136	0	2967.2	12755.2	0		4.07273
1137	0	3047.2	12755.2	0		4.1532
1138	0	3127.2	12755.2	0		4.46449
1139	0	3207.2	12755.2	0		4.51052
1140	0	3287.2	12755.2	0		4.51889
1141	0	3367.2	12755.2	0		5.23516
1142	0	3447.2	12755.2	0		4.84451
1143	0	3527.2	12755.2	0		4.66344
1144	0	3607.2	12755.2	0		4.37634
1145	0	3687.2	12755.2	0		4.75535
1146	0	3767.2	12755.2	0		4.86771
1147	0	3847.2	12755.2	0		4.61002
1148	0	3927.2	12755.2	0		4.58422
1149	0	4007.2	12755.2	0		5.58655
1150	0	4087.2	12755.2	0		4.68025
1151	0	4167.2	12755.2	0		4.74747
1152	0	4247.2	12755.2	0		5.04364
1153	0	4327.2	12755.2	0		4.44848
1154	0	4407.2	12755.2	0		5.48
1155	0	4487.2	12755.2	0		5.26545
1156	0	167.2	12675.2	0		2.94505
1157	0	247.2	12675.2	0		2.96782
1158	0	327.2	12675.2	0		3.2666
1159	0	407.2	12675.2	0		3.34039
1160	0	487.2	12675.2	0		3.29478
1161	0	567.2	12675.2	0		3.65934
1162	0	647.2	12675.2	0		4.16051
1163	0	727.2	12675.2	0		4.28267
1164	0	807.2	12675.2	0		3.74048
1165	0	887.2	12675.2	0		3.80425
1166	0	967.2	12675.2	0		3.58035
1167	0	1047.2	12675.2	0		3.47058
1168	0	1127.2	12675.2	0		3.58552
1169	0	1207.2	12675.2	0		3.59084
1170	0	1287.2	12675.2	0		3.41202
1171	0	1367.2	12675.2	0		3.94335
1172	0	1447.2	12675.2	0		4.02653
1173	0	1527.2	12675.2	0		3.95379
1174	0	1607.2	12675.2	0		3.83509
1175	0	1687.2	12675.2	0		3.60413
1176	0	1767.2	12675.2	0		3.21295
1177	0	1847.2	12675.2	0		3.46816
1178	0	1927.2	12675.2	0		3.38292
1179	0	2007.2	12675.2	0		3.20752
1180	0	2087.2	12675.2	0		3.25976
1181	0	2167.2	12675.2	0		3.42021
1182	0	2247.2	12675.2	0		3.6792
1183	0	2327.2	12675.2	0		3.5244
1184	0	2407.2	12675.2	0		3.76175
1185	0	2487.2	12675.2	0		3.50685
1186	0	2567.2	12675.2	0		3.72289
1187	0	2647.2	12675.2	0		3.88629
1188	0	2727.2	12675.2	0		3.86171
1189	0	2807.2	12675.2	0		3.99267
1190	0	2887.2	12675.2	0		3.45736
1191	0	2967.2	12675.2	0		4.12721
1192	0	3047.2	12675.2	0		4.40663
1193	0	3127.2	12675.2	0		4.47862
1194	0	3207.2	12675.2	0		4.39074
1195	0	3287.2	12675.2	0		4.08047
1196	0	3367.2	12675.2	0		4.52392
1197	0	3447.2	12675.2	0		4.997
1198	0	3527.2	12675.2	0		4.84403
1199	0	3607.2	12675.2	0		4.50613
1200	0	3687.2	12675.2	0		4.38358
1201	0	3767.2	12675.2	0		4.58154
1202	0	3847.2	12675.2	0		4.75192
1203	0	3927.2	12675.2	0		4.48875
1204	0	4007.2	12675.2	0		5.33456
1205	0	4087.2	12675.2	0		4.70216
1206	0	4167.2	12675.2	0		4.8163
1207	0	4247.2	12675.2	0		4.72925
1208	0	4327.2	12675.2	0		4.73668
1209	0	4407.2	12675.2	0		5.33954
1210	0	4487.2	12675.2	0		5.08553
1211	0	4567.2	12675.2	0		5.00086
1212	0	167.2	12595.2	0		3.64572
1213	0	247.2	12595.2	0		3.33133
1214	0	327.2	12595.2	0		3.91192
1215	0	407.2	12595.2	0		3.72593
1216	0	487.2	12595.2	0		3.79823
1217	0	567.2	12595.2	0		3.78031
1218	0	647.2	12595.2	0		3.73642
1219	0	727.2	12595.2	0		4.14189
1220	0	807.2	12595.2	0		3.84892
1221	0	887.2	12595.2	0		3.77801
1222	0	967.2	12595.2	0		3.61389
1223	0	1047.2	12595.2	0		3.76247
1224	0	1127.2	12595.2	0		3.74452
1225	0	1207.2	12595.2	0		3.65341
1226	0	1287.2	12595.2	0		3.41525
1227	0	1367.2	12595.2	0		3.75352
1228	0	1447.2	12595.2	0		3.6763
1229	0	1527.2	12595.2	0		3.1938
1230	0	1607.2	12595.2	0		3.45633
1231	0	1687.2	12595.2	0		2.80438
1232	0	1767.2	12595.2	0		2.83243
1233	0	1847.2	12595.2	0		2.68402
1234	0	1927.2	12595.2	0		2.68505
1235	0	2007.2	12595.2	0		2.92094
1236	0	2087.2	12595.2	0		2.80574
1237	0	2167.2	12595.2	0		2.9273
1238	0	2247.2	12595.2	0		3.18605
1239	0	2327.2	12595.2	0		3.21584
1240	0	2407.2	12595.2	0		3.3961
1241	0	2487.2	12595.2	0		3.4876
1242	0	2567.2	12595.2	0		3.43979
1243	0	2647.2	12595.2	0		3.50271
1244	0	2727.2	12595.2	0		3.41659
1245	0	2807.2	12595.2	0		3.63767
1246	0	2887.2	12595.2	0		3.65205
1247	0	2967.2	12595.2	0		3.77146
1248	0	3047.2	12595.2	0		4.27883
1249	0	3127.2	12595.2	0		4.29312
1250	0	3207.2	12595.2	0		4.26142
1251	0	3287.2	12595.2	0		4.324
1252	0	3367.2	12595.2	0		4.72924
1253	0	3447.2	12595.2	0		4.34049
1254	0	3527.2	12595.2	0		4.57366
1255	0	3607.2	12595.2	0		4.0927
1256	0	3687.2	12595.2	0		4.08323
1257	0	3767.2	12595.2	0		4.53438
1258	0	3847.2	12595.2	0		4.71459
1259	0	3927.2	12595.2	0		4.66534
1260	0	4007.2	12595.2	0		4.5245
1261	0	4087.2	12595.2	0		4.80425
1262	0	4167.2	12595.2	0		4.90078
1263	0	4247.2	12595.2	0		5.00346
1264	0	4327.2	12595.2	0		5.04528
1265	0	4407.2	12595.2	0		4.82321
1266	0	4487.2	12595.2	0		4.94906
1267	0	4567.2	12595.2	0		5.17093
1268	0	4647.2	12595.2	0		5.45597
1269	0	4727.2	12595.2	0		4.42546
1270	0	167.2	12515.2	0		4.83433
1271	0	247.2	12515.2	0		3.53145
1272	0	327.2	12515.2	0		4.53037
1273	0	407.2	12515.2	0		3.66116
1274	0	487.2	12515.2	0		4.71423
1275	0	567.2	12515.2	0		3.74842
1276	0	647.2	12515.2	0		4.26165
1277	0	727.2	12515.2	0		3.95294
1278	0	807.2	12515.2	0		4.0106
1279	0	887.2	12515.2	0		3.7818
1280	0	967.2	12515.2	0		3.42636
1281	0	1047.2	12515.2	0		3.65695
1282	0	1127.2	12515.2	0		3.32758
1283	0	1207.2	12515.2	0		3.49305
1284	0	1287.2	12515.2	0		4.06959
1285	0	1367.2	12515.2	0		3.60483
1286	0	1447.2	12515.2	0		3.98994
1287	0	1527.2	12515.2	0		3.2015
1288	0	1607.2	12515.2	0		2.58625
1289	0	1687.2	12515.2	0		2.90627
1290	0	1767.2	12515.2	0		2.34878
1291	0	1847.2	12515.2	0		2.37806
1292	0	1927.2	12515.2	0		2.53181
1293	0	2007.2	12515.2	0		2.55973
1294	0	2087.2	12515.2	0		2.62421
1295	0	2167.2	12515.2	0		2.94203
1296	0	2247.2	12515.2	0		2.76287
1297	0	2327.2	12515.2	0		2.7521
1298	0	2407.2	12515.2	0		3.35672
1299	0	2487.2	12515.2	0		2.96713
1300	0	2567.2	12515.2	0		3.18463
1301	0	2647.2	12515.2	0		3.55603
1302	0	2727.2	12515.2	0		3.19551
1303	0	2807.2	12515.2	0		3.53271
1304	0	2887.2	12515.2	0		4.14545
1305	0	2967.2	12515.2	0		3.56595
1306	0	3047.2	12515.2	0		4.13199
1307	0	3127.2	12515.2	0		4.14566
1308	0	3207.2	12515.2	0		4.04129
1309	0	3287.2	12515.2	0		3.86129
1310	0	3367.2	12515.2	0		3.84995
1311	0	3447.2	12515.2	0		4.56792
1312	0	3527.2	12515.2	0		4.08412
1313	0	3607.2	12515.2	0		4.58641
1314	0	3687.2	12515.2	0		3.89541
1315	0	3767.2	12515.2	0		4.60132
1316	0	3847.2	12515.2	0		4.29692
1317	0	3927.2	12515.2	0		5.07884
1318	0	4007.2	12515.2	0		4.56958
1319	0	4087.2	12515.2	0		4.94791
1320	0	4167.2	12515.2	0		4.97833
1321	0	4247.2	12515.2	0		4.80889
1322	0	4327.2	12515.2	0		4.43204
1323	0	4407.2	12515.2	0		4.58534
1324	0	4487.2	12515.2	0		5.31494
1325	0	4567.2	12515.2	0		4.83348
1326	0	4647.2	12515.2	0		5.58518
1327	0	4727.2	12515.2	0		5.74192
1328	0	4807.2	12515.2	0		4.04525
1329	0	167.2	12435.2	0		3.97799
1330	0	247.2	12435.2	0		3.5628
1331	0	327.2	12435.2	0		3.8473
1332	0	407.2	12435.2	0		4.00471
1333	0	487.2	12435.2	0		4.13077
1334	0	567.2	12435.2	0		3.65091
1335	0	647.2	12435.2	0		4.55813
1336	0	727.2	12435.2	0		4.20962
1337	0	807.2	12435.2	0		3.65008
1338	0	887.2	12435.2	0		3.77409
1339	0	967.2	12435.2	0		3.45564
1340	0	1047.2	12435.2	0		3.26565
1341	0	1127.2	12435.2	0		3.33701
1342	0	1207.2	12435.2	0		3.46851
1343	0	1287.2	12435.2	0		3.48968
1344	0	1367.2	12435.2	0		3.28821
1345	0	1447.2	12435.2	0		2.92719
1346	0	1527.2	12435.2	0		3.37328
1347	0	1607.2	12435.2	0		2.86304
1348	0	1687.2	12435.2	0		2.53557
1349	0	1767.2	12435.2	0		2.20402
1350	0	1847.2	12435.2	0		2.05912
1351	0	1927.2	12435.2	0		2.05832
1352	0	2007.2	12435.2	0		1.99298
1353	0	2087.2	12435.2	0		2.43311
1354	0	2167.2	12435.2	0		2.24706
1355	0	2247.2	12435.2	0		2.29594
1356	0	2327.2	12435.2	0		2.50088
1357	0	2407.2	12435.2	0		2.6235
1358	0	2487.2	12435.2	0		2.48558
1359	0	2567.2	12435.2	0		2.92804
1360	0	2647.2	12435.2	0		3.11751
1361	0	2727.2	12435.2	0		3.14568
1362	0	2807.2	12435.2	0		2.99815
1363	0	2887.2	12435.2	0		3.64218
1364	0	2967.2	12435.2	0		3.64804
1365	0	3047.2	12435.2	0		3.66923
1366	0	3127.2	12435.2	0		4.22622
1367	0	3207.2	12435.2	0		4.0605
1368	0	3287.2	12435.2	0		3.84552
1369	0	3367.2	12435.2	0		3.97917
1370	0	3447.2	12435.2	0		4.19704
1371	0	3527.2	12435.2	0		4.00598
1372	0	3607.2	12435.2	0		4.2817
1373	0	3687.2	12435.2	0		4.22495
1374	0	3767.2	12435.2	0		3.95207
1375	0	3847.2	12435.2	0		4.14902
1376	0	3927.2	12435.2	0		4.32301
1377	0	4007.2	12435.2	0		4.64975
1378	0	4087.2	12435.2	0		4.96036
1379	0	4167.2	12435.2	0		5.10022
1380	0	4247.2	12435.2	0		4.86075
1381	0	4327.2	12435.2	0		4.93182
1382	0	4407.2	12435.2	0		5.69941
1383	0	4487.2	12435.2	0		4.82438
1384	0	4567.2	12435.2	0		5.06552
1385	0	4647.2	12435.2	0		5.33954
1386	0	4727.2	12435.2	0		4.87175
1387	0	4807.2	12435.2	0		5.51699
1388	0	4887.2	12435.2	0		6.78386
1389	0	167.2	12355.2	0		4.22183
1390	0	247.2	12355.2	0		3.5014
1391	0	327.2	12355.2	0		3.89264
1392	0	407.2	12355.2	0		3.58896
1393	0	487.2	12355.2	0		3.47844
1394	0	567.2	12355.2	0		3.54058
1395	0	647.2	12355.2	0		4.06733
1396	0	727.2	12355.2	0		3.37392
1397	0	807.2	12355.2	0		3.86195
1398	0	887.2	12355.2	0		3.26944
1399	0	967.2	12355.2	0		3.20188
1400	0	1047.2	12355.2	0		3.44814
1401	0	1127.2	12355.2	0		3.37872
1402	0	1207.2	12355.2	0		3.19436
1403	0	1287.2	12355.2	0		3.4264
1404	0	1367.2	12355.2	0		3.07729
1405	0	1447.2	12355.2	0		3.67043
1406	0	1527.2	12355.2	0		2.85062
1407	0	1607.2	12355.2	0		3.13191
1408	0	1687.2	12355.2	0		2.46549
1409	0	1767.2	12355.2	0		1.8792
1410	0	1847.2	12355.2	0		2.10597
1411	0	1927.2	12355.2	0		1.96221
1412	0	2007.2	12355.2	0		2.02659
1413	0	2087.2	12355.2	0		1.97586
1414	0	2167.2	12355.2	0		1.81519
1415	0	2247.2	12355.2	0		2.0571
1416	0	2327.2	12355.2	0		1.98023
1417	0	2407.2	12355.2	0		2.17582
1418	0	2487.2	12355.2	0		2.3317
1419	0	2567.2	12355.2	0		2.36388
1420	0	2647.2	12355.2	0		2.53625
1421	0	2727.2	12355.2	0		2.97344
1422	0	2807.2	12355.2	0		3.25446
1423	0	2887.2	12355.2	0		3.45868
1424	0	2967.2	12355.2	0		3.36879
1425	0	3047.2	12355.2	0		3.55259
1426	0	3127.2	12355.2	0		3.48054
1427	0	3207.2	12355.2	0		4.12811
1428	0	3287.2	12355.2	0		4.20336
1429	0	3367.2	12355.2	0		3.8057
1430	0	3447.2	12355.2	0		4.17512
1431	0	3527.2	12355.2	0		4.14666
1432	0	3607.2	12355.2	0		4.13943
1433	0	3687.2	12355.2	0		3.77757
1434	0	3767.2	12355.2	0		4.40836
1435	0	3847.2	12355.2	0		4.12197
1436	0	3927.2	12355.2	0		4.81775
1437	0	4007.2	12355.2	0		4.85478
1438	0	4087.2	12355.2	0		4.29527
1439	0	4167.2	12355.2	0		4.78642
1440	0	4247.2	12355.2	0		4.82583
1441	0	4327.2	12355.2	0		4.85566
1442	0	4407.2	12355.2	0		5.01674
1443	0	4487.2	12355.2	0		5.01736
1444	0	4567.2	12355.2	0		4.70955
1445	0	4647.2	12355.2	0		4.97363
1446	0	4727.2	12355.2	0		4.8959
1447	0	4807.2	12355.2	0		5.41662
1448	0	4887.2	12355.2	0		4.74952
1449	0	167.2	12275.2	0		3.43469
1450	0	247.2	12275.2	0		3.49742
1451	0	327.2	12275.2	0		3.70193
1452	0	407.2	12275.2	0		3.43539
1453	0	487.2	12275.2	0		3.72883
1454	0	567.2	12275.2	0		3.59569
1455	0	647.2	12275.2	0		3.60528
1456	0	727.2	12275.2	0		3.74691
1457	0	807.2	12275.2	0		3.60019
1458	0	887.2	12275.2	0		3.76783
1459	0	967.2	12275.2	0		2.83119
1460	0	1047.2	12275.2	0		3.36495
1461	0	1127.2	12275.2	0		3.37802
1462	0	1207.2	12275.2	0		3.35393
1463	0	1287.2	12275.2	0		3.16987
1464	0	1367.2	12275.2	0		3.59573
1465	0	1447.2	12275.2	0		3.27387
1466	0	1527.2	12275.2	0		2.98265
1467	0	1607.2	12275.2	0		2.88098
1468	0	1687.2	12275.2	0		2.6872
1469	0	1767.2	12275.2	0		2.20764
1470	0	1847.2	12275.2	0		1.69293
1471	0	1927.2	12275.2	0		1.82526
1472	0	2007.2	12275.2	0		1.96128
1473	0	2087.2	12275.2	0		1.67361
1474	0	2167.2	12275.2	0		1.80208
1475	0	2247.2	12275.2	0		1.7989
1476	0	2327.2	12275.2	0		2.04411
1477	0	2407.2	12275.2	0		1.75263
1478	0	2487.2	12275.2	0		1.97056
1479	0	2567.2	12275.2	0		2.44285
1480	0	2647.2	12275.2	0		2.55494
1481	0	2727.2	12275.2	0		2.53784
1482	0	2807.2	12275.2	0		3.04054
1483	0	2887.2	12275.2	0		2.98678
1484	0	2967.2	12275.2	0		3.04691
1485	0	3047.2	12275.2	0		3.76203
1486	0	3127.2	12275.2	0		3.59688
1487	0	3207.2	12275.2	0		3.58856
1488	0	3287.2	12275.2	0		3.59335
1489	0	3367.2	12275.2	0		3.9286
1490	0	3447.2	12275.2	0		4.13016
1491	0	3527.2	12275.2	0		3.89737
1492	0	3607.2	12275.2	0		4.0993
1493	0	3687.2	12275.2	0		4.17295
1494	0	3767.2	12275.2	0		4.34143
1495	0	3847.2	12275.2	0		4.11279
1496	0	3927.2	12275.2	0		4.67466
1497	0	4007.2	12275.2	0		5.12523
1498	0	4087.2	12275.2	0		4.67633
1499	0	4167.2	12275.2	0		4.99345
1500	0	4247.2	12275.2	0		5.32655
1501	0	4327.2	12275.2	0		4.76534
1502	0	4407.2	12275.2	0		4.42294
1503	0	4487.2	12275.2	0		5.26715
1504	0	4567.2	12275.2	0		4.50334
1505	0	4647.2	12275.2	0		5.06761
1506	0	4727.2	12275.2	0		4.60957
1507	0	4807.2	12275.2	0		4.82151
1508	0	4887.2	12275.2	0		5.00896
1509	0	87.2004	12195.2	0		3.80269
1510	0	167.2	12195.2	0		3.73203
1511	0	247.2	12195.2	0		3.69658
1512	0	327.2	12195.2	0		3.41265
1513	0	407.2	12195.2	0		3.2642
1514	0	487.2	12195.2	0		3.45406
1515	0	567.2	12195.2	0		3.51039
1516	0	647.2	12195.2	0		3.27811
1517	0	727.2	12195.2	0		3.22607
1518	0	807.2	12195.2	0		3.51021
1519	0	887.2	12195.2	0		3.45359
1520	0	967.2	12195.2	0		3.04447
1521	0	1047.2	12195.2	0		3.05312
1522	0	1127.2	12195.2	0		2.93067
1523	0	1207.2	12195.2	0		3.07857
1524	0	1287.2	12195.2	0		3.48274
1525	0	1367.2	12195.2	0		2.92005
1526	0	1447.2	12195.2	0		3.09728
1527	0	1527.2	12195.2	0		3.15198
1528	0	1607.2	12195.2	0		2.73615
1529	0	1687.2	12195.2	0		2.75668
1530	0	1767.2	12195.2	0		2.10396
1531	0	1847.2	12195.2	0		1.89835
1532	0	1927.2	12195.2	0		1.89982
1533	0	2007.2	12195.2	0		1.77599
1534	0	2087.2	12195.2	0		2.02916
1535	0	2167.2	12195.2	0		1.85147
1536	0	2247.2	12195.2	0		1.62322
1537	0	2327.2	12195.2	0		1.68654
1538	0	2407.2	12195.2	0		1.75984
1539	0	2487.2	12195.2	0		1.90664
1540	0	2567.2	12195.2	0		1.76152
1541	0	2647.2	12195.2	0		2.02612
1542	0	2727.2	12195.2	0		2.33849
1543	0	2807.2	12195.2	0		2.0844
1544	0	2887.2	12195.2	0		2.83236
1545	0	2967.2	12195.2	0		3.06816
1546	0	3047.2	12195.2	0		3.3141
1547	0	3127.2	12195.2	0		3.21873
1548	0	3207.2	12195.2	0		3.48783
1549	0	3287.2	12195.2	0		3.54941
1550	0	3367.2	12195.2	0		3.50908
1551	0	3447.2	12195.2	0		3.55472
1552	0	3527.2	12195.2	0		3.75328
1553	0	3607.2	12195.2	0		3.80437
1554	0	3687.2	12195.2	0		3.948
1555	0	3767.2	12195.2	0		4.11594
1556	0	3847.2	12195.2	0		3.9797
1557	0	3927.2	12195.2	0		4.46085
1558	0	4007.2	12195.2	0		4.4406
1559	0	4087.2	12195.2	0		4.94931
1560	0	4167.2	12195.2	0		5.1204
1561	0	4247.2	12195.2	0		4.74601
1562	0	4327.2	12195.2	0		4.91532
1563	0	4407.2	12195.2	0		4.63126
1564	0	4487.2	12195.2	0		4.86518
1565	0	4567.2	12195.2	0		4.58103
1566	0	4647.2	12195.2	0		4.50135
1567	0	4727.2	12195.2	0		4.9054
1568	0	4807.2	12195.2	0		4.58905
1569	0	4887.2	12195.2	0		5.11724
1570	0	87.2004	12115.2	0		3.46547
1571	0	167.2	12115.2	0		3.62878
1572	0	247.2	12115.2	0		3.37432
1573	0	327.2	12115.2	0		3.40333
1574	0	407.2	12115.2	0		2.97362
1575	0	487.2	12115.2	0		3.19544
1576	0	567.2	12115.2	0		3.65339
1577	0	647.2	12115.2	0		3.5014
1578	0	727.2	12115.2	0		3.29956
1579	0	807.2	12115.2	0		3.17335
1580	0	887.2	12115.2	0		3.11633
1581	0	967.2	12115.2	0		3.06171
1582	0	1047.2	12115.2	0		3.22388
1583	0	1127.2	12115.2	0		2.92762
1584	0	1207.2	12115.2	0		3.45234
1585	0	1287.2	12115.2	0		3.56192
1586	0	1367.2	12115.2	0		3.77335
1587	0	1447.2	12115.2	0		3.36833
1588	0	1527.2	12115.2	0		3.19978
1589	0	1607.2	12115.2	0		3.60145
1590	0	1687.2	12115.2	0		2.71285
1591	0	1767.2	12115.2	0		2.57874
1592	0	1847.2	12115.2	0		2.18377
1593	0	1927.2	12115.2	0		2.32234
1594	0	2007.2	12115.2	0		1.84826
1595	0	2087.2	12115.2	0		1.95187
1596	0	2167.2	12115.2	0		1.90331
1597	0	2247.2	12115.2	0		1.76926
1598	0	2327.2	12115.2	0		1.86986
1599	0	2407.2	12115.2	0		1.84747
1600	0	2487.2	12115.2	0		1.57458
1601	0	2567.2	12115.2	0		1.63406
1602	0	2647.2	12115.2	0		1.74527
1603	0	2727.2	12115.2	0		1.91105
1604	0	2807.2	12115.2	0		1.99515
1605	0	2887.2	12115.2	0		2.18411
1606	0	2967.2	12115.2	0		2.37262
1607	0	3047.2	12115.2	0		2.73286
1608	0	3127.2	12115.2	0		3.18159
1609	0	3207.2	12115.2	0		3.04532
1610	0	3287.2	12115.2	0		3.55135
1611	0	3367.2	12115.2	0		3.48362
1612	0	3447.2	12115.2	0		3.4707
1613	0	3527.2	12115.2	0		3.47187
1614	0	3607.2	12115.2	0		3.45547
1615	0	3687.2	12115.2	0		3.83135
1616	0	3767.2	12115.2	0		3.42858
1617	0	3847.2	12115.2	0		4.44383
1618	0	3927.2	12115.2	0		4.31296
1619	0	4007.2	12115.2	0		4.65996
1620	0	4087.2	12115.2	0		4.42082
1621	0	4167.2	12115.2	0		4.6724
1622	0	4247.2	12115.2	0		5.11424
1623	0	4327.2	12115.2	0		5.12591
1624	0	4407.2	12115.2	0		5.353
1625	0	4487.2	12115.2	0		5.18993
1626	0	4567.2	12115.2	0		4.5793
1627	0	4647.2	12115.2	0		4.61279
1628	0	4727.2	12115.2	0		4.6441
1629	0	4807.2	12115.2	0		5.36911
1630	0	4887.2	12115.2	0		4.99267
1631	0	87.2004	12035.2	0		3.95715
1632	0	167.2	12035.2	0		3.80183
1633	0	247.2	12035.2	0		3.61661
1634	0	327.2	12035.2	0		3.53304
1635	0	407.2	12035.2	0		3.57421
1636	0	487.2	12035.2	0		3.63982
1637	0	567.2	12035.2	0		3.23375
1638	0	647.2	12035.2	0		3.38016
1639	0	727.2	12035.2	0		3.36908
1640	0	807.2	12035.2	0		3.93293
1641	0	887.2	12035.2	0		3.29858
1642	0	967.2	12035.2	0		3.28069
1643	0	1047.2	12035.2	0		3.17155
1644	0	1127.2	12035.2	0		3.35896
1645	0	1207.2	12035.2	0		3.22182
1646	0	1287.2	12035.2	0		3.64488
1647	0	1367.2	12035.2	0		3.29997
1648	0	1447.2	12035.2	0		3.35236
1649	0	1527.2	12035.2	0		3.38278
1650	0	1607.2	12035.2	0		3.36999
1651	0	1687.2	12035.2	0		3.60186
1652	0	1767.2	12035.2	0		3.1718
1653	0	1847.2	12035.2	0		2.61961
1654	0	1927.2	12035.2	0		2.3439
1655	0	2007.2	12035.2	0		2.36602
1656	0	2087.2	12035.2	0		2.10273
1657	0	2167.2	12035.2	0		2.10682
1658	0	2247.2	12035.2	0		1.92125
1659	0	2327.2	12035.2	0		1.63438
1660	0	2407.2	12035.2	0		1.69036
1661	0	2487.2	12035.2	0		1.54667
1662	0	2567.2	12035.2	0		1.70002
1663	0	2647.2	12035.2	0		1.68319
1664	0	2727.2	12035.2	0		1.7138
1665	0	2807.2	12035.2	0		1.84351
1666	0	2887.2	12035.2	0		1.88944
1667	0	2967.2	12035.2	0		2.33858
1668	0	3047.2	12035.2	0		2.75478
1669	0	3127.2	12035.2	0		2.85383
1670	0	3207.2	12035.2	0		2.91701
1671	0	3287.2	12035.2	0		3.20737
1672	0	3367.2	12035.2	0		3.26802
1673	0	3447.2	12035.2	0		3.31362
1674	0	3527.2	12035.2	0		3.74773
1675	0	3607.2	12035.2	0		3.6588
1676	0	3687.2	12035.2	0		3.69206
1677	0	3767.2	12035.2	0		3.61447
1678	0	3847.2	12035.2	0		4.00136
1679	0	3927.2	12035.2	0		4.3299
1680	0	4007.2	12035.2	0		4.64841
1681	0	4087.2	12035.2	0		4.61017
1682	0	4167.2	12035.2	0		5.37156
1683	0	4247.2	12035.2	0		4.71804
1684	0	4327.2	12035.2	0		5.18149
1685	0	4407.2	12035.2	0		5.17311
1686	0	4487.2	12035.2	0		4.70603
1687	0	4567.2	12035.2	0		4.70683
1688	0	4647.2	12035.2	0		4.67352
1689	0	4727.2	12035.2	0		4.62501
1690	0	4807.2	12035.2	0		5.16216
1691	0	4887.2	12035.2	0		6.53229
1692	0	87.2004	11955.2	0		2.74885
1693	0	167.2	11955.2	0		3.58311
1694	0	247.2	11955.2	0		3.82469
1695	0	327.2	11955.2	0		3.90712
1696	0	407.2	11955.2	0		3.43283
1697	0	487.2	11955.2	0		3.84744
1698	0	567.2	11955.2	0		3.62663
1699	0	647.2	11955.2	0		3.77579
1700	0	727.2	11955.2	0		3.51411
1701	0	807.2	11955.2	0		3.46359
1702	0	887.2	11955.2	0		3.76667
1703	0	967.2	11955.2	0		3.33892
1704	0	1047.2	11955.2	0		3.39894
1705	0	1127.2	11955.2	0		3.80267
1706	0	1207.2	11955.2	0		3.69439
1707	0	1287.2	11955.2	0		3.44456
1708	0	1367.2	11955.2	0		3.4019
1709	0	1447.2	11955.2	0		3.75585
1710	0	1527.2	11955.2	0		3.25721
1711	0	1607.2	11955.2	0		3.3624
1712	0	1687.2	11955.2	0		3.28722
1713	0	1767.2	11955.2	0		3.31822
1714	0	1847.2	11955.2	0		2.87839
1715	0	1927.2	11955.2	0		3.21082
1716	0	2007.2	11955.2	0		2.71582
1717	0	2087.2	11955.2	0		2.5592
1718	0	2167.2	11955.2	0		2.47754
1719	0	2247.2	11955.2	0		2.20294
1720	0	2327.2	11955.2	0		1.80198
1721	0	2407.2	11955.2	0		1.62947
1722	0	2487.2	11955.2	0		1.83598
1723	0	2567.2	11955.2	0		1.60235
1724	0	2647.2	11955.2	0		1.57189
1725	0	2727.2	11955.2	0		1.67419
1726	0	2807.2	11955.2	0		1.56141
1727	0	2887.2	11955.2	0		1.7607
1728	0	2967.2	11955.2	0		2.01187
1729	0	3047.2	11955.2	0		2.50788
1730	0	3127.2	11955.2	0		2.65003
1731	0	3207.2	11955.2	0		3.17096
1732	0	3287.2	11955.2	0		3.06434
1733	0	3367.2	11955.2	0		3.24296
1734	0	3447.2	11955.2	0		3.60219
1735	0	3527.2	11955.2	0		3.53818
1736	0	3607.2	11955.2	0		3.85852
1737	0	3687.2	11955.2	0		3.69926
1738	0	3767.2	11955.2	0		3.91071
1739	0	3847.2	11955.2	0		4.13761
1740	0	3927.2	11955.2	0		4.26099
1741	0	4007.2	11955.2	0		4.44492
1742	0	4087.2	11955.2	0		4.42579
1743	0	4167.2	11955.2	0		4.73182
1744	0	4247.2	11955.2	0		5.47355
1745	0	4327.2	11955.2	0		4.98273
1746	0	4407.2	11955.2	0		5.04132
1747	0	4487.2	11955.2	0		4.8373
1748	0	4567.2	11955.2	0		4.66096
1749	0	4647.2	11955.2	0		4.32128
1750	0	4727.2	11955.2	0		4.52387
1751	0	4807.2	11955.2	0		4.91954
1752	0	4887.2	11955.2	0		6.03797
1753	0	87.2004	11875.2	0		4.20811
1754	0	167.2	11875.2	0		4.205
1755	0	247.2	11875.2	0		4.02965
1756	0	327.2	11875.2	0		3.64884
1757	0	407.2	11875.2	0		4.00035
1758	0	487.2	11875.2	0		3.60969
1759	0	567.2	11875.2	0		4.1439
1760	0	647.2	11875.2	0		3.65306
1761	0	727.2	11875.2	0		3.80302
1762	0	807.2	11875.2	0		4.08192
1763	0	887.2	11875.2	0		3.77276
1764	0	967.2	11875.2	0		3.71378
1765	0	1047.2	11875.2	0		3.38211
1766	0	1127.2	11875.2	0		3.81202
1767	0	1207.2	11875.2	0		3.45786
1768	0	1287.2	11875.2	0		3.72528
1769	0	1367.2	11875.2	0		3.73023
1770	0	1447.2	11875.2	0		3.46975
1771	0	1527.2	11875.2	0		3.68347
1772	0	1607.2	11875.2	0		3.38509
1773	0	1687.2	11875.2	0		3.32599
1774	0	1767.2	11875.2	0		3.67358
1775	0	1847.2	11875.2	0		3.51349
1776	0	1927.2	11875.2	0		3.40245
1777	0	2007.2	11875.2	0		2.79346
1778	0	2087.2	11875.2	0		3.45032
1779	0	2167.2	11875.2	0		2.98337
1780	0	2247.2	11875.2	0		2.73856
1781	0	2327.2	11875.2	0		2.43576
1782	0	2407.2	11875.2	0		1.7873
1783	0	2487.2	11875.2	0		1.6518
1784	0	2567.2	11875.2	0		1.48661
1785	0	2647.2	11875.2	0		1.50429
1786	0	2727.2	11875.2	0		1.56354
1787	0	2807.2	11875.2	0		1.44151
1788	0	2887.2	11875.2	0		1.65989
1789	0	2967.2	11875.2	0		1.68746
1790	0	3047.2	11875.2	0		2.08954
1791	0	3127.2	11875.2	0		2.23705
1792	0	3207.2	11875.2	0		2.67976
1793	0	3287.2	11875.2	0		3.13985
1794	0	3367.2	11875.2	0		3.27803
1795	0	3447.2	11875.2	0		3.48293
1796	0	3527.2	11875.2	0		3.4362
1797	0	3607.2	11875.2	0		4.34633
1798	0	3687.2	11875.2	0		4.00273
1799	0	3767.2	11875.2	0		3.70562
1800	0	3847.2	11875.2	0		3.8161
1801	0	3927.2	11875.2	0		4.33562
1802	0	4007.2	11875.2	0		4.46934
1803	0	4087.2	11875.2	0		5.73124
1804	0	4167.2	11875.2	0		4.69175
1805	0	4247.2	11875.2	0		5.2139
1806	0	4327.2	11875.2	0		5.47033
1807	0	4407.2	11875.2	0		5.02515
1808	0	4487.2	11875.2	0		5.05145
1809	0	4567.2	11875.2	0		4.76908
1810	0	4647.2	11875.2	0		4.43855
1811	0	4727.2	11875.2	0		4.4672
1812	0	4807.2	11875.2	0		4.75006
1813	0	4887.2	11875.2	0		5.11789
1814	0	87.2004	11795.2	0		3.86412
1815	0	167.2	11795.2	0		4.11085
1816	0	247.2	11795.2	0		3.83784
1817	0	327.2	11795.2	0		3.82999
1818	0	407.2	11795.2	0		4.03433
1819	0	487.2	11795.2	0		3.97465
1820	0	567.2	11795.2	0		4.64743
1821	0	647.2	11795.2	0		3.67259
1822	0	727.2	11795.2	0		3.99771
1823	0	807.2	11795.2	0		3.92202
1824	0	887.2	11795.2	0		4.13583
1825	0	967.2	11795.2	0		3.64059
1826	0	1047.2	11795.2	0		3.74854
1827	0	1127.2	11795.2	0		3.96076
1828	0	1207.2	11795.2	0		3.79624
1829	0	1287.2	11795.2	0		4.0368
1830	0	1367.2	11795.2	0		3.78149
1831	0	1447.2	11795.2	0		3.62671
1832	0	1527.2	11795.2	0		4.19759
1833	0	1607.2	11795.2	0		3.28064
1834	0	1687.2	11795.2	0		3.71852
1835	0	1767.2	11795.2	0		3.76079
1836	0	1847.2	11795.2	0		3.3697
1837	0	1927.2	11795.2	0		3.33561
1838	0	2007.2	11795.2	0		3.36217
1839	0	2087.2	11795.2	0		3.78793
1840	0	2167.2	11795.2	0		2.81233
1841	0	2247.2	11795.2	0		2.81661
1842	0	2327.2	11795.2	0		2.38734
1843	0	2407.2	11795.2	0		2.07588
1844	0	2487.2	11795.2	0		1.97183
1845	0	2567.2	11795.2	0		1.797
1846	0	2647.2	11795.2	0		1.35152
1847	0	2727.2	11795.2	0		1.59074
1848	0	2807.2	11795.2	0		1.69067
1849	0	2887.2	11795.2	0		1.72937
1850	0	2967.2	11795.2	0		1.84673
1851	0	3047.2	11795.2	0		1.89447
1852	0	3127.2	11795.2	0		2.15933
1853	0	3207.2	11795.2	0		2.74902
1854	0	3287.2	11795.2	0		2.82527
1855	0	3367.2	11795.2	0		3.31391
1856	0	3447.2	11795.2	0		3.09435
1857	0	3527.2	11795.2	0		3.86096
1858	0	3607.2	11795.2	0		4.20484
1859	0	3687.2	11795.2	0		3.90127
1860	0	3767.2	11795.2	0		4.29232
1861	0	3847.2	11795.2	0		3.79556
1862	0	3927.2	11795.2	0		4.58693
1863	0	4007.2	11795.2	0		4.42521
1864	0	4087.2	11795.2	0		4.83244
1865	0	4167.2	11795.2	0		4.5847
1866	0	4247.2	11795.2	0		5.04104
1867	0	4327.2	11795.2	0		5.0067
1868	0	4407.2	11795.2	0		4.67916
1869	0	4487.2	11795.2	0		5.25044
1870	0	4567.2	11795.2	0		4.65417
1871	0	4647.2	11795.2	0		4.72127
1872	0	4727.2	11795.2	0		5.08029
1873	0	4807.2	11795.2	0		5.27995
1874	0	4887.2	11795.2	0		5.41181
1875	0	4967.2	11795.2	0		6.77006
1876	0	87.2004	11715.2	0		3.9198
1877	0	167.2	11715.2	0		4.42557
1878	0	247.2	11715.2	0		3.87428
1879	0	327.2	11715.2	0		4.1055
1880	0	407.2	11715.2	0		4.18756
1881	0	487.2	11715.2	0		4.61928
1882	0	567.2	11715.2	0		4.31334
1883	0	647.2	11715.2	0		4.3647
1884	0	727.2	11715.2	0		4.55692
1885	0	807.2	11715.2	0		4.20653
1886	0	887.2	11715.2	0		4.6298
1887	0	967.2	11715.2	0		4.17123
1888	0	1047.2	11715.2	0		4.15824
1889	0	1127.2	11715.2	0		4.18621
1890	0	1207.2	11715.2	0		4.3243
1891	0	1287.2	11715.2	0		3.99248
1892	0	1367.2	11715.2	0		3.50421
1893	0	1447.2	11715.2	0		3.8233
1894	0	1527.2	11715.2	0		4.21205
1895	0	1607.2	11715.2	0		3.42274
1896	0	1687.2	11715.2	0		4.04181
1897	0	1767.2	11715.2	0		3.55456
1898	0	1847.2	11715.2	0		3.82206
1899	0	1927.2	11715.2	0		3.59808
1900	0	2007.2	11715.2	0		3.17972
1901	0	2087.2	11715.2	0		3.46462
1902	0	2167.2	11715.2	0		2.88353
1903	0	2247.2	11715.2	0		2.5809
1904	0	2327.2	11715.2	0		2.29559
1905	0	2407.2	11715.2	0		2.05286
1906	0	2487.2	11715.2	0		1.92409
1907	0	2567.2	11715.2	0		2.06977
1908	0	2647.2	11715.2	0		1.77506
1909	0	2727.2	11715.2	0		1.72974
1910	0	2807.2	11715.2	0		1.7895
1911	0	2887.2	11715.2	0		1.37211
1912	0	2967.2	11715.2	0		1.69571
1913	0	3047.2	11715.2	0		1.94977
1914	0	3127.2	11715.2	0		2.16835
1915	0	3207.2	11715.2	0		2.63211
1916	0	3287.2	11715.2	0		2.90132
1917	0	3367.2	11715.2	0		3.3966
1918	0	3447.2	11715.2	0		3.53094
1919	0	3527.2	11715.2	0		3.45221
1920	0	3607.2	11715.2	0		3.68696
1921	0	3687.2	11715.2	0		4.13253
1922	0	3767.2	11715.2	0		4.67822
1923	0	3847.2	11715.2	0		4.38079
1924	0	3927.2	11715.2	0		4.64215
1925	0	4007.2	11715.2	0		4.71457
1926	0	4087.2	11715.2	0		4.89773
1927	0	4167.2	11715.2	0		4.82532
1928	0	4247.2	11715.2	0		4.96134
1929	0	4327.2	11715.2	0		5.5856
1930	0	4407.2	11715.2	0		4.90493
1931	0	4487.2	11715.2	0		4.72227
1932	0	4567.2	11715.2	0		4.65129
1933	0	4647.2	11715.2	0		4.96211
1934	0	4727.2	11715.2	0		4.95378
1935	0	4807.2	11715.2	0		4.1255
1936	0	4887.2	11715.2	0		4.18096
1937	0	4967.2	11715.2	0		4.39336
1938	0	87.2004	11635.2	0		4.7985
1939	0	167.2	11635.2	0		4.22842
1940	0	247.2	11635.2	0		4.23903
1941	0	327.2	11635.2	0		3.97269
1942	0	407.2	11635.2	0		4.47627
1943	0	487.2	11635.2	0		4.16282
1944	0	567.2	11635.2	0		4.02469
1945	0	647.2	11635.2	0		5.03167
1946	0	727.2	11635.2	0		4.57132
1947	0	807.2	11635.2	0		4.69019
1948	0	887.2	11635.2	0		4.56879
1949	0	967.2	11635.2	0		4.69088
1950	0	1047.2	11635.2	0		4.57939
1951	0	1127.2	11635.2	0		4.6915
1952	0	1207.2	11635.2	0		4.22446
1953	0	1287.2	11635.2	0		4.02952
1954	0	1367.2	11635.2	0		4.16336
1955	0	1447.2	11635.2	0		3.96702
1956	0	1527.2	11635.2	0		4.30243
1957	0	1607.2	11635.2	0		4.09721
1958	0	1687.2	11635.2	0		4.27932
1959	0	1767.2	11635.2	0		3.61203
1960	0	1847.2	11635.2	0		3.3605
1961	0	1927.2	11635.2	0		3.09246
1962	0	2007.2	11635.2	0		3.23826
1963	0	2087.2	11635.2	0		3.18583
1964	0	2167.2	11635.2	0		3.14872
1965	0	2247.2	11635.2	0		3.40262
1966	0	2327.2	11635.2	0		2.88994
1967	0	2407.2	11635.2	0		2.4892
1968	0	2487.2	11635.2	0		1.92705
1969	0	2567.2	11635.2	0		1.90339
1970	0	2647.2	11635.2	0		1.5749
1971	0	2727.2	11635.2	0		1.73754
1972	0	2807.2	11635.2	0		1.62942
1973	0	2887.2	11635.2	0		1.78447
1974	0	2967.2	11635.2	0		1.90711
1975	0	3047.2	11635.2	0		2.01626
1976	0	3127.2	11635.2	0		2.38536
1977	0	3207.2	11635.2	0		2.68282
1978	0	3287.2	11635.2	0		2.72224
1979	0	3367.2	11635.2	0		3.0141
1980	0	3447.2	11635.2	0		3.48262
1981	0	3527.2	11635.2	0		3.63242
1982	0	3607.2	11635.2	0		3.5435
1983	0	3687.2	11635.2	0		4.39529
1984	0	3767.2	11635.2	0		4.33602
1985	0	3847.2	11635.2	0		4.94704
1986	0	3927.2	11635.2	0		4.59271
1987	0	4007.2	11635.2	0		5.23776
1988	0	4087.2	11635.2	0		5.10637
1989	0	4167.2	11635.2	0		5.13166
1990	0	4247.2	11635.2	0		5.01378
1991	0	4327.2	11635.2	0		5.24797
1992	0	4407.2	11635.2	0		4.80866
1993	0	4487.2	11635.2	0		5.11419
1994	0	4567.2	11635.2	0		4.50696
1995	0	4647.2	11635.2	0		4.58049
1996	0	4727.2	11635.2	0		4.43548
1997	0	4807.2	11635.2	0		4.51459
1998	0	4887.2	11635.2	0		4.90035
[truncated: 28,813 more rows]

## Sheet: Fig 5J
spotId	raster	x	y	z	Date	Glutamate/Aspartate
0	0	4056.23	19892.6	0		1.32371
1	0	4136.23	19892.6	0		14.2766
2	0	4216.23	19892.6	0		1.49176
3	0	4296.23	19892.6	0		1.73444
4	0	4376.23	19892.6	0		9.24022
5	0	4456.23	19892.6	0		0.172737
6	0	3416.23	19812.6	0		2.30108
7	0	3496.23	19812.6	0		2.0423
8	0	3576.23	19812.6	0		2.17146
9	0	3656.23	19812.6	0		2.53628
10	0	3736.23	19812.6	0		2.26696
11	0	3816.23	19812.6	0		2.13304
12	0	3896.23	19812.6	0		2.31422
13	0	3976.23	19812.6	0		2.32918
14	0	4056.23	19812.6	0		2.41289
15	0	4136.23	19812.6	0		2.80515
16	0	4216.23	19812.6	0		2.53328
17	0	4296.23	19812.6	0		2.97405
18	0	4376.23	19812.6	0		2.81655
19	0	4456.23	19812.6	0		3.38132
20	0	4536.23	19812.6	0		3.01089
21	0	4616.23	19812.6	0		2.79452
22	0	4696.23	19812.6	0		3.09851
23	0	4776.23	19812.6	0		2.61549
24	0	4856.23	19812.6	0		2.72269
25	0	4936.23	19812.6	0		2.77683
26	0	5016.23	19812.6	0		3.42974
27	0	5096.23	19812.6	0		2.8379
28	0	5176.23	19812.6	0		3.00871
29	0	5256.23	19812.6	0		2.60165
30	0	5336.23	19812.6	0		2.1374
31	0	5416.23	19812.6	0		2.88617
32	0	5496.23	19812.6	0		2.58871
33	0	5576.23	19812.6	0		2.74078
34	0	5656.23	19812.6	0		1.90916
35	0	1896.23	19732.6	0		2.69638
36	0	1976.23	19732.6	0		2.77831
37	0	2056.23	19732.6	0		2.75246
38	0	2136.23	19732.6	0		2.72713
39	0	2216.23	19732.6	0		2.43149
40	0	2296.23	19732.6	0		2.56745
41	0	2376.23	19732.6	0		2.67167
42	0	2456.23	19732.6	0		2.37953
43	0	2536.23	19732.6	0		2.73703
44	0	2616.23	19732.6	0		2.57021
45	0	2696.23	19732.6	0		2.31484
46	0	2776.23	19732.6	0		2.47405
47	0	2856.23	19732.6	0		2.20807
48	0	2936.23	19732.6	0		2.08304
49	0	3016.23	19732.6	0		1.9803
50	0	3096.23	19732.6	0		2.09047
51	0	3176.23	19732.6	0		2.39693
52	0	3256.23	19732.6	0		2.16553
53	0	3336.23	19732.6	0		2.17913
54	0	3416.23	19732.6	0		2.01127
55	0	3496.23	19732.6	0		2.07366
56	0	3576.23	19732.6	0		2.39612
57	0	3656.23	19732.6	0		2.35138
58	0	3736.23	19732.6	0		2.26918
59	0	3816.23	19732.6	0		2.12723
60	0	3896.23	19732.6	0		2.55866
61	0	3976.23	19732.6	0		2.77466
62	0	4056.23	19732.6	0		2.71473
63	0	4136.23	19732.6	0		3.22916
64	0	4216.23	19732.6	0		2.58888
65	0	4296.23	19732.6	0		2.96108
66	0	4376.23	19732.6	0		2.82815
67	0	4456.23	19732.6	0		2.92126
68	0	4536.23	19732.6	0		2.6707
69	0	4616.23	19732.6	0		2.85145
70	0	4696.23	19732.6	0		2.8105
71	0	4776.23	19732.6	0		2.55691
72	0	4856.23	19732.6	0		2.69891
73	0	4936.23	19732.6	0		2.7064
74	0	5016.23	19732.6	0		2.85369
75	0	5096.23	19732.6	0		2.86122
76	0	5176.23	19732.6	0		2.80206
77	0	5256.23	19732.6	0		2.70532
78	0	5336.23	19732.6	0		2.4762
79	0	5416.23	19732.6	0		2.29912
80	0	5496.23	19732.6	0		2.22638
81	0	5576.23	19732.6	0		2.20836
82	0	5656.23	19732.6	0		2.25778
83	0	5736.23	19732.6	0		2.42977
84	0	6776.23	19732.6	0		14.5697
85	0	6856.23	19732.6	0		2.43329
86	0	1496.23	19652.6	0		4.18341
87	0	1576.23	19652.6	0		3.42251
88	0	1656.23	19652.6	0		3.38526
89	0	1736.23	19652.6	0		3.20219
90	0	1816.23	19652.6	0		2.55411
91	0	1896.23	19652.6	0		2.60452
92	0	1976.23	19652.6	0		2.52628
93	0	2056.23	19652.6	0		2.56378
94	0	2136.23	19652.6	0		2.43263
95	0	2216.23	19652.6	0		2.26594
96	0	2296.23	19652.6	0		2.52766
97	0	2376.23	19652.6	0		2.63939
98	0	2456.23	19652.6	0		2.36246
99	0	2536.23	19652.6	0		2.51712
100	0	2616.23	19652.6	0		2.15378
101	0	2696.23	19652.6	0		2.22093
102	0	2776.23	19652.6	0		2.04349
103	0	2856.23	19652.6	0		2.43919
104	0	2936.23	19652.6	0		2.18737
105	0	3016.23	19652.6	0		2.42188
106	0	3096.23	19652.6	0		2.22952
107	0	3176.23	19652.6	0		2.118
108	0	3256.23	19652.6	0		2.40932
109	0	3336.23	19652.6	0		2.23882
110	0	3416.23	19652.6	0		2.06119
111	0	3496.23	19652.6	0		2.30686
112	0	3576.23	19652.6	0		2.0813
113	0	3656.23	19652.6	0		2.23379
114	0	3736.23	19652.6	0		2.10041
115	0	3816.23	19652.6	0		2.31583
116	0	3896.23	19652.6	0		2.26302
117	0	3976.23	19652.6	0		2.53662
118	0	4056.23	19652.6	0		2.49984
119	0	4136.23	19652.6	0		2.63944
120	0	4216.23	19652.6	0		2.39974
121	0	4296.23	19652.6	0		2.71523
122	0	4376.23	19652.6	0		2.77516
123	0	4456.23	19652.6	0		2.68964
124	0	4536.23	19652.6	0		2.71003
125	0	4616.23	19652.6	0		2.80837
126	0	4696.23	19652.6	0		2.82836
127	0	4776.23	19652.6	0		2.73956
128	0	4856.23	19652.6	0		2.78523
129	0	4936.23	19652.6	0		2.7115
130	0	5016.23	19652.6	0		2.8005
131	0	5096.23	19652.6	0		2.95892
132	0	5176.23	19652.6	0		2.67267
133	0	5256.23	19652.6	0		2.22495
134	0	5336.23	19652.6	0		2.33814
135	0	5416.23	19652.6	0		2.4783
136	0	5496.23	19652.6	0		2.25166
137	0	5576.23	19652.6	0		2.27889
138	0	5656.23	19652.6	0		2.164
139	0	5736.23	19652.6	0		2.3896
140	0	6696.23	19652.6	0		1.81707
141	0	6776.23	19652.6	0		2.59
142	0	6856.23	19652.6	0		2.35609
143	0	6936.23	19652.6	0		2.34322
144	0	7016.23	19652.6	0		2.44027
145	0	7096.23	19652.6	0		2.19766
146	0	7176.23	19652.6	0		2.14824
147	0	7256.23	19652.6	0		2.29631
148	0	7336.23	19652.6	0		2.07624
149	0	7416.23	19652.6	0		2.46038
150	0	7496.23	19652.6	0		2.22515
151	0	7576.23	19652.6	0		2.51506
152	0	7656.23	19652.6	0		2.47154
153	0	7736.23	19652.6	0		2.34966
154	0	7816.23	19652.6	0		3.08009
155	0	7896.23	19652.6	0		3.00747
156	0	7976.23	19652.6	0		2.80403
157	0	8056.23	19652.6	0		2.95009
158	0	8136.23	19652.6	0		3.41733
159	0	8216.23	19652.6	0		4.29079
160	0	8296.23	19652.6	0		3.17022
161	0	8376.23	19652.6	0		3.01018
162	0	8456.23	19652.6	0		2.7705
163	0	8536.23	19652.6	0		4.26118
164	0	8616.23	19652.6	0		2.87133
165	0	8696.23	19652.6	0		3.10106
166	0	8776.23	19652.6	0		3.59821
167	0	8856.23	19652.6	0		1.68881
168	0	8936.23	19652.6	0		2.78739
169	0	9016.23	19652.6	0		2.08995
170	0	9096.23	19652.6	0		11.5181
171	0	1096.23	19572.6	0		1.77781
172	0	1176.23	19572.6	0		2.23848
173	0	1256.23	19572.6	0		2.51715
174	0	1336.23	19572.6	0		3.19711
175	0	1416.23	19572.6	0		2.9906
176	0	1496.23	19572.6	0		3.1315
177	0	1576.23	19572.6	0		3.53615
178	0	1656.23	19572.6	0		2.87711
179	0	1736.23	19572.6	0		2.68837
180	0	1816.23	19572.6	0		2.87057
181	0	1896.23	19572.6	0		2.31983
182	0	1976.23	19572.6	0		2.55077
183	0	2056.23	19572.6	0		2.25123
184	0	2136.23	19572.6	0		2.31423
185	0	2216.23	19572.6	0		2.1809
186	0	2296.23	19572.6	0		2.59644
187	0	2376.23	19572.6	0		2.34998
188	0	2456.23	19572.6	0		2.52129
189	0	2536.23	19572.6	0		2.52985
190	0	2616.23	19572.6	0		2.27893
191	0	2696.23	19572.6	0		2.25448
192	0	2776.23	19572.6	0		2.36751
193	0	2856.23	19572.6	0		2.15536
194	0	2936.23	19572.6	0		2.20623
195	0	3016.23	19572.6	0		2.1908
196	0	3096.23	19572.6	0		1.93732
197	0	3176.23	19572.6	0		2.20897
198	0	3256.23	19572.6	0		2.05772
199	0	3336.23	19572.6	0		1.96147
200	0	3416.23	19572.6	0		2.24288
201	0	3496.23	19572.6	0		2.18346
202	0	3576.23	19572.6	0		2.14695
203	0	3656.23	19572.6	0		2.09496
204	0	3736.23	19572.6	0		2.27949
205	0	3816.23	19572.6	0		1.99144
206	0	3896.23	19572.6	0		2.29207
207	0	3976.23	19572.6	0		2.52906
208	0	4056.23	19572.6	0		2.28214
209	0	4136.23	19572.6	0		2.53667
210	0	4216.23	19572.6	0		2.47086
211	0	4296.23	19572.6	0		2.43388
212	0	4376.23	19572.6	0		2.57213
213	0	4456.23	19572.6	0		2.57521
214	0	4536.23	19572.6	0		2.7877
215	0	4616.23	19572.6	0		2.72823
216	0	4696.23	19572.6	0		2.7894
217	0	4776.23	19572.6	0		2.76914
218	0	4856.23	19572.6	0		2.97009
219	0	4936.23	19572.6	0		2.68484
220	0	5016.23	19572.6	0		2.95387
221	0	5096.23	19572.6	0		2.92674
222	0	5176.23	19572.6	0		3.16916
223	0	5256.23	19572.6	0		3.02792
224	0	5336.23	19572.6	0		2.38319
225	0	5416.23	19572.6	0		2.42766
226	0	5496.23	19572.6	0		2.4998
227	0	5576.23	19572.6	0		2.14747
228	0	5656.23	19572.6	0		2.23934
229	0	5736.23	19572.6	0		2.44578
230	0	5816.23	19572.6	0		2.34982
231	0	5896.23	19572.6	0		2.32813
232	0	5976.23	19572.6	0		2.5119
233	0	6056.23	19572.6	0		2.18393
234	0	6616.23	19572.6	0		2.21307
235	0	6696.23	19572.6	0		2.72232
236	0	6776.23	19572.6	0		2.42162
237	0	6856.23	19572.6	0		2.28439
238	0	6936.23	19572.6	0		2.18723
239	0	7016.23	19572.6	0		2.12418
240	0	7096.23	19572.6	0		2.14473
241	0	7176.23	19572.6	0		2.17601
242	0	7256.23	19572.6	0		2.06017
243	0	7336.23	19572.6	0		2.10773
244	0	7416.23	19572.6	0		2.0352
245	0	7496.23	19572.6	0		2.39467
246	0	7576.23	19572.6	0		2.17243
247	0	7656.23	19572.6	0		2.39475
248	0	7736.23	19572.6	0		2.61978
249	0	7816.23	19572.6	0		2.71186
250	0	7896.23	19572.6	0		2.71716
251	0	7976.23	19572.6	0		2.59662
252	0	8056.23	19572.6	0		2.91246
253	0	8136.23	19572.6	0		3.1467
254	0	8216.23	19572.6	0		2.96908
255	0	8296.23	19572.6	0		2.69296
256	0	8376.23	19572.6	0		2.91646
257	0	8456.23	19572.6	0		2.8211
258	0	8536.23	19572.6	0		2.73776
259	0	8616.23	19572.6	0		2.52001
260	0	8696.23	19572.6	0		2.52901
261	0	8776.23	19572.6	0		2.56192
262	0	8856.23	19572.6	0		2.42016
263	0	8936.23	19572.6	0		2.19252
264	0	9016.23	19572.6	0		2.32613
265	0	9096.23	19572.6	0		2.15138
266	0	9176.23	19572.6	0		2.01725
267	0	9256.23	19572.6	0		2.18733
268	0	9336.23	19572.6	0		2.1998
269	0	9416.23	19572.6	0		1.9539
270	0	9496.23	19572.6	0		2.06041
271	0	9576.23	19572.6	0		2.04032
272	0	9656.23	19572.6	0		1.91271
273	0	9736.23	19572.6	0		1.91208
274	0	9816.23	19572.6	0		1.82795
275	0	9896.23	19572.6	0		1.9238
276	0	9976.23	19572.6	0		1.85023
277	0	10056.2	19572.6	0		1.94028
278	0	10136.2	19572.6	0		1.82847
279	0	10216.2	19572.6	0		2.05464
280	0	10296.2	19572.6	0		2.05723
281	0	10376.2	19572.6	0		2.06124
282	0	10456.2	19572.6	0		2.13459
283	0	10536.2	19572.6	0		2.20346
284	0	10616.2	19572.6	0		2.16202
285	0	10696.2	19572.6	0		1.8284
286	0	10776.2	19572.6	0		2.56329
287	0	10856.2	19572.6	0		2.81428
288	0	10936.2	19572.6	0		2.96382
289	0	11016.2	19572.6	0		2.95327
290	0	11096.2	19572.6	0		3.22149
291	0	11176.2	19572.6	0		3.57928
292	0	11256.2	19572.6	0		3.72755
293	0	11336.2	19572.6	0		3.80468
294	0	11416.2	19572.6	0		5.16138
295	0	11496.2	19572.6	0		3.75626
296	0	11576.2	19572.6	0		4.60503
297	0	11656.2	19572.6	0		5.22559
298	0	11736.2	19572.6	0		4.94559
299	0	11816.2	19572.6	0		6.12067
300	0	936.23	19492.6	0		13.7416
301	0	1016.23	19492.6	0		1.88951
302	0	1096.23	19492.6	0		2.11356
303	0	1176.23	19492.6	0		2.35576
304	0	1256.23	19492.6	0		2.72328
305	0	1336.23	19492.6	0		3.11323
306	0	1416.23	19492.6	0		3.40815
307	0	1496.23	19492.6	0		3.94784
308	0	1576.23	19492.6	0		3.64804
309	0	1656.23	19492.6	0		3.09603
310	0	1736.23	19492.6	0		2.81789
311	0	1816.23	19492.6	0		2.71358
312	0	1896.23	19492.6	0		2.59932
313	0	1976.23	19492.6	0		2.67739
314	0	2056.23	19492.6	0		2.40329
315	0	2136.23	19492.6	0		2.42748
316	0	2216.23	19492.6	0		2.40557
317	0	2296.23	19492.6	0		2.34121
318	0	2376.23	19492.6	0		2.39597
319	0	2456.23	19492.6	0		2.22461
320	0	2536.23	19492.6	0		2.56139
321	0	2616.23	19492.6	0		2.39747
322	0	2696.23	19492.6	0		2.29239
323	0	2776.23	19492.6	0		2.07064
324	0	2856.23	19492.6	0		2.29313
325	0	2936.23	19492.6	0		2.16056
326	0	3016.23	19492.6	0		2.29345
327	0	3096.23	19492.6	0		2.0704
328	0	3176.23	19492.6	0		2.08101
329	0	3256.23	19492.6	0		2.03616
330	0	3336.23	19492.6	0		2.07996
331	0	3416.23	19492.6	0		2.06835
332	0	3496.23	19492.6	0		2.00783
333	0	3576.23	19492.6	0		2.10151
334	0	3656.23	19492.6	0		2.06541
335	0	3736.23	19492.6	0		2.03572
336	0	3816.23	19492.6	0		2.00895
337	0	3896.23	19492.6	0		1.9217
338	0	3976.23	19492.6	0		2.3665
339	0	4056.23	19492.6	0		2.31653
340	0	4136.23	19492.6	0		2.27041
341	0	4216.23	19492.6	0		2.43129
342	0	4296.23	19492.6	0		2.27521
343	0	4376.23	19492.6	0		2.72026
344	0	4456.23	19492.6	0		2.54063
345	0	4536.23	19492.6	0		2.74505
346	0	4616.23	19492.6	0		2.54152
347	0	4696.23	19492.6	0		2.71344
348	0	4776.23	19492.6	0		2.5015
349	0	4856.23	19492.6	0		2.90558
350	0	4936.23	19492.6	0		2.60342
351	0	5016.23	19492.6	0		3.11342
352	0	5096.23	19492.6	0		2.93875
353	0	5176.23	19492.6	0		2.93723
354	0	5256.23	19492.6	0		2.86621
355	0	5336.23	19492.6	0		2.90737
356	0	5416.23	19492.6	0		2.46473
357	0	5496.23	19492.6	0		2.17717
358	0	5576.23	19492.6	0		2.36271
359	0	5656.23	19492.6	0		2.35942
360	0	5736.23	19492.6	0		2.3025
361	0	5816.23	19492.6	0		2.47869
362	0	5896.23	19492.6	0		2.45047
363	0	5976.23	19492.6	0		2.16675
364	0	6056.23	19492.6	0		2.49456
365	0	6136.23	19492.6	0		2.37678
366	0	6536.23	19492.6	0		2.54609
367	0	6616.23	19492.6	0		2.50044
368	0	6696.23	19492.6	0		2.48916
369	0	6776.23	19492.6	0		2.34074
370	0	6856.23	19492.6	0		2.20039
371	0	6936.23	19492.6	0		2.1129
372	0	7016.23	19492.6	0		2.10202
373	0	7096.23	19492.6	0		1.90114
374	0	7176.23	19492.6	0		1.99935
375	0	7256.23	19492.6	0		2.05862
376	0	7336.23	19492.6	0		2.06275
377	0	7416.23	19492.6	0		1.9969
378	0	7496.23	19492.6	0		2.04544
379	0	7576.23	19492.6	0		2.16165
380	0	7656.23	19492.6	0		2.32427
381	0	7736.23	19492.6	0		2.39892
382	0	7816.23	19492.6	0		2.54056
383	0	7896.23	19492.6	0		2.52542
384	0	7976.23	19492.6	0		2.63218
385	0	8056.23	19492.6	0		2.96795
386	0	8136.23	19492.6	0		2.74125
387	0	8216.23	19492.6	0		3.12514
388	0	8296.23	19492.6	0		2.77508
389	0	8376.23	19492.6	0		3.09733
390	0	8456.23	19492.6	0		2.71411
391	0	8536.23	19492.6	0		2.77239
392	0	8616.23	19492.6	0		2.54005
393	0	8696.23	19492.6	0		2.46875
394	0	8776.23	19492.6	0		2.46011
395	0	8856.23	19492.6	0		2.4599
396	0	8936.23	19492.6	0		2.41361
397	0	9016.23	19492.6	0		2.18019
398	0	9096.23	19492.6	0		1.99645
399	0	9176.23	19492.6	0		2.06876
400	0	9256.23	19492.6	0		2.10335
401	0	9336.23	19492.6	0		1.96045
402	0	9416.23	19492.6	0		2.07582
403	0	9496.23	19492.6	0		1.83559
404	0	9576.23	19492.6	0		1.72015
405	0	9656.23	19492.6	0		1.91012
406	0	9736.23	19492.6	0		1.70052
407	0	9816.23	19492.6	0		1.94155
408	0	9896.23	19492.6	0		1.85658
409	0	9976.23	19492.6	0		1.7697
410	0	10056.2	19492.6	0		1.7758
411	0	10136.2	19492.6	0		1.87786
412	0	10216.2	19492.6	0		1.82653
413	0	10296.2	19492.6	0		1.89393
414	0	10376.2	19492.6	0		1.76139
415	0	10456.2	19492.6	0		1.80503
416	0	10536.2	19492.6	0		1.88346
417	0	10616.2	19492.6	0		1.97181
418	0	10696.2	19492.6	0		2.02995
419	0	10776.2	19492.6	0		2.25693
420	0	10856.2	19492.6	0		2.54066
421	0	10936.2	19492.6	0		2.76251
422	0	11016.2	19492.6	0		3.00976
423	0	11096.2	19492.6	0		3.10547
424	0	11176.2	19492.6	0		3.34747
425	0	11256.2	19492.6	0		4.0538
426	0	11336.2	19492.6	0		4.15323
427	0	11416.2	19492.6	0		4.1901
428	0	11496.2	19492.6	0		4.76211
429	0	11576.2	19492.6	0		4.4974
430	0	11656.2	19492.6	0		4.84162
431	0	11736.2	19492.6	0		4.62851
432	0	11816.2	19492.6	0		5.38751
433	0	776.23	19412.6	0		1.19219
434	0	856.23	19412.6	0		2.11546
435	0	936.23	19412.6	0		1.95688
436	0	1016.23	19412.6	0		2.11671
437	0	1096.23	19412.6	0		2.15057
438	0	1176.23	19412.6	0		2.00987
439	0	1256.23	19412.6	0		2.17165
440	0	1336.23	19412.6	0		2.37885
441	0	1416.23	19412.6	0		3.00834
442	0	1496.23	19412.6	0		3.44078
443	0	1576.23	19412.6	0		2.64592
444	0	1656.23	19412.6	0		2.92378
445	0	1736.23	19412.6	0		2.55847
446	0	1816.23	19412.6	0		2.3813
447	0	1896.23	19412.6	0		2.29455
448	0	1976.23	19412.6	0		2.38967
449	0	2056.23	19412.6	0		2.29467
450	0	2136.23	19412.6	0		2.15106
451	0	2216.23	19412.6	0		2.43074
452	0	2296.23	19412.6	0		2.30573
453	0	2376.23	19412.6	0		2.25046
454	0	2456.23	19412.6	0		2.20963
455	0	2536.23	19412.6	0		2.34212
456	0	2616.23	19412.6	0		2.25281
457	0	2696.23	19412.6	0		2.08104
458	0	2776.23	19412.6	0		2.11507
459	0	2856.23	19412.6	0		2.15992
460	0	2936.23	19412.6	0		2.03134
461	0	3016.23	19412.6	0		2.19642
462	0	3096.23	19412.6	0		2.02975
463	0	3176.23	19412.6	0		2.06086
464	0	3256.23	19412.6	0		2.05189
465	0	3336.23	19412.6	0		2.0648
466	0	3416.23	19412.6	0		1.98037
467	0	3496.23	19412.6	0		1.99726
468	0	3576.23	19412.6	0		2.07276
469	0	3656.23	19412.6	0		2.02359
470	0	3736.23	19412.6	0		1.86952
471	0	3816.23	19412.6	0		2.0471
472	0	3896.23	19412.6	0		1.96674
473	0	3976.23	19412.6	0		2.08284
474	0	4056.23	19412.6	0		1.98861
475	0	4136.23	19412.6	0		2.14441
476	0	4216.23	19412.6	0		2.16192
477	0	4296.23	19412.6	0		2.24277
478	0	4376.23	19412.6	0		2.27136
479	0	4456.23	19412.6	0		2.44889
480	0	4536.23	19412.6	0		2.20918
481	0	4616.23	19412.6	0		2.38598
482	0	4696.23	19412.6	0		2.18145
483	0	4776.23	19412.6	0		2.56932
484	0	4856.23	19412.6	0		2.57522
485	0	4936.23	19412.6	0		2.55592
486	0	5016.23	19412.6	0		2.43017
487	0	5096.23	19412.6	0		2.47791
488	0	5176.23	19412.6	0		2.8315
489	0	5256.23	19412.6	0		2.79479
490	0	5336.23	19412.6	0		2.42246
491	0	5416.23	19412.6	0		2.22457
492	0	5496.23	19412.6	0		2.43669
493	0	5576.23	19412.6	0		2.36667
494	0	5656.23	19412.6	0		2.39727
495	0	5736.23	19412.6	0		2.36424
496	0	5816.23	19412.6	0		2.25898
497	0	5896.23	19412.6	0		2.39384
498	0	5976.23	19412.6	0		2.34182
499	0	6056.23	19412.6	0		2.31646
500	0	6136.23	19412.6	0		2.57321
501	0	6216.23	19412.6	0		2.25684
502	0	6296.23	19412.6	0		2.32415
503	0	6376.23	19412.6	0		3.00049
504	0	6456.23	19412.6	0		2.87185
505	0	6536.23	19412.6	0		2.61916
506	0	6616.23	19412.6	0		2.35309
507	0	6696.23	19412.6	0		2.36938
508	0	6776.23	19412.6	0		2.47341
509	0	6856.23	19412.6	0		2.3254
510	0	6936.23	19412.6	0		2.24696
511	0	7016.23	19412.6	0		2.06262
512	0	7096.23	19412.6	0		2.08018
513	0	7176.23	19412.6	0		2.07283
514	0	7256.23	19412.6	0		2.031
515	0	7336.23	19412.6	0		1.89204
516	0	7416.23	19412.6	0		2.06027
517	0	7496.23	19412.6	0		2.10122
518	0	7576.23	19412.6	0		2.01283
519	0	7656.23	19412.6	0		2.15594
520	0	7736.23	19412.6	0		2.33563
521	0	7816.23	19412.6	0		2.1316
522	0	7896.23	19412.6	0		2.42833
523	0	7976.23	19412.6	0		2.50489
524	0	8056.23	19412.6	0		2.44262
525	0	8136.23	19412.6	0		2.70176
526	0	8216.23	19412.6	0		2.35395
527	0	8296.23	19412.6	0		2.50744
528	0	8376.23	19412.6	0		2.63583
529	0	8456.23	19412.6	0		2.56426
530	0	8536.23	19412.6	0		2.52992
531	0	8616.23	19412.6	0		2.37851
532	0	8696.23	19412.6	0		2.2791
533	0	8776.23	19412.6	0		2.36713
534	0	8856.23	19412.6	0		2.14166
535	0	8936.23	19412.6	0		2.08837
536	0	9016.23	19412.6	0		2.22122
537	0	9096.23	19412.6	0		1.97271
538	0	9176.23	19412.6	0		1.90736
539	0	9256.23	19412.6	0		1.97311
540	0	9336.23	19412.6	0		1.78532
541	0	9416.23	19412.6	0		2.01551
542	0	9496.23	19412.6	0		1.90464
543	0	9576.23	19412.6	0		1.71017
544	0	9656.23	19412.6	0		1.85963
545	0	9736.23	19412.6	0		1.80346
546	0	9816.23	19412.6	0		1.78256
547	0	9896.23	19412.6	0		1.86696
548	0	9976.23	19412.6	0		1.7628
549	0	10056.2	19412.6	0		1.71926
550	0	10136.2	19412.6	0		1.77751
551	0	10216.2	19412.6	0		1.87829
552	0	10296.2	19412.6	0		1.89311
553	0	10376.2	19412.6	0		1.76659
554	0	10456.2	19412.6	0		1.89405
555	0	10536.2	19412.6	0		1.89921
556	0	10616.2	19412.6	0		2.08056
557	0	10696.2	19412.6	0		2.15385
558	0	10776.2	19412.6	0		2.15057
559	0	10856.2	19412.6	0		2.57581
560	0	10936.2	19412.6	0		2.60805
561	0	11016.2	19412.6	0		2.80149
562	0	11096.2	19412.6	0		3.14444
563	0	11176.2	19412.6	0		3.33413
564	0	11256.2	19412.6	0		3.6741
565	0	11336.2	19412.6	0		3.59185
566	0	11416.2	19412.6	0		4.27555
567	0	11496.2	19412.6	0		4.7804
568	0	11576.2	19412.6	0		4.61451
569	0	11656.2	19412.6	0		4.52452
570	0	11736.2	19412.6	0		4.61473
571	0	11816.2	19412.6	0		4.67781
572	0	11896.2	19412.6	0		4.97711
573	0	696.23	19332.6	0		1.53574
574	0	776.23	19332.6	0		2.19521
575	0	856.23	19332.6	0		2.14479
576	0	936.23	19332.6	0		1.96289
577	0	1016.23	19332.6	0		2.10274
578	0	1096.23	19332.6	0		1.829
579	0	1176.23	19332.6	0		2.08997
580	0	1256.23	19332.6	0		2.27153
581	0	1336.23	19332.6	0		2.10483
582	0	1416.23	19332.6	0		2.52486
583	0	1496.23	19332.6	0		2.33852
584	0	1576.23	19332.6	0		2.67535
585	0	1656.23	19332.6	0		2.59396
586	0	1736.23	19332.6	0		2.49947
587	0	1816.23	19332.6	0		2.41804
588	0	1896.23	19332.6	0		2.29992
589	0	1976.23	19332.6	0		2.2941
590	0	2056.23	19332.6	0		2.28426
591	0	2136.23	19332.6	0		2.24219
592	0	2216.23	19332.6	0		2.28128
593	0	2296.23	19332.6	0		2.24195
594	0	2376.23	19332.6	0		2.08714
595	0	2456.23	19332.6	0		2.12445
596	0	2536.23	19332.6	0		2.29142
597	0	2616.23	19332.6	0		2.22229
598	0	2696.23	19332.6	0		2.26384
599	0	2776.23	19332.6	0		2.43674
600	0	2856.23	19332.6	0		2.08293
601	0	2936.23	19332.6	0		2.03984
602	0	3016.23	19332.6	0		1.98318
603	0	3096.23	19332.6	0		1.82451
604	0	3176.23	19332.6	0		1.78905
605	0	3256.23	19332.6	0		2.00341
606	0	3336.23	19332.6	0		1.98022
607	0	3416.23	19332.6	0		1.8181
608	0	3496.23	19332.6	0		1.81098
609	0	3576.23	19332.6	0		1.85494
610	0	3656.23	19332.6	0		2.04919
611	0	3736.23	19332.6	0		1.82953
612	0	3816.23	19332.6	0		1.98036
613	0	3896.23	19332.6	0		2.00695
614	0	3976.23	19332.6	0		2.11608
615	0	4056.23	19332.6	0		2.17652
616	0	4136.23	19332.6	0		2.22676
617	0	4216.23	19332.6	0		2.07719
618	0	4296.23	19332.6	0		2.14242
619	0	4376.23	19332.6	0		2.24478
620	0	4456.23	19332.6	0		2.19526
621	0	4536.23	19332.6	0		2.07065
622	0	4616.23	19332.6	0		2.27138
623	0	4696.23	19332.6	0		2.21968
624	0	4776.23	19332.6	0		2.13495
625	0	4856.23	19332.6	0		2.22511
626	0	4936.23	19332.6	0		2.55754
627	0	5016.23	19332.6	0		2.44366
628	0	5096.23	19332.6	0		2.58081
629	0	5176.23	19332.6	0		2.63994
630	0	5256.23	19332.6	0		2.79681
631	0	5336.23	19332.6	0		2.52377
632	0	5416.23	19332.6	0		2.61045
633	0	5496.23	19332.6	0		2.57661
634	0	5576.23	19332.6	0		2.50075
635	0	5656.23	19332.6	0		2.45247
636	0	5736.23	19332.6	0		2.38598
637	0	5816.23	19332.6	0		2.46736
638	0	5896.23	19332.6	0		2.39433
639	0	5976.23	19332.6	0		2.49233
640	0	6056.23	19332.6	0		2.1726
641	0	6136.23	19332.6	0		2.37208
642	0	6216.23	19332.6	0		2.42342
643	0	6296.23	19332.6	0		2.58168
644	0	6376.23	19332.6	0		2.48863
645	0	6456.23	19332.6	0		2.53103
646	0	6536.23	19332.6	0		2.77285
647	0	6616.23	19332.6	0		2.53056
648	0	6696.23	19332.6	0		2.44861
649	0	6776.23	19332.6	0		2.26363
650	0	6856.23	19332.6	0		2.19547
651	0	6936.23	19332.6	0		2.1547
652	0	7016.23	19332.6	0		1.99158
653	0	7096.23	19332.6	0		2.22298
654	0	7176.23	19332.6	0		2.17931
655	0	7256.23	19332.6	0		2.03085
656	0	7336.23	19332.6	0		2.05739
657	0	7416.23	19332.6	0		2.11654
658	0	7496.23	19332.6	0		1.93588
659	0	7576.23	19332.6	0		2.1039
660	0	7656.23	19332.6	0		2.14335
661	0	7736.23	19332.6	0		2.17493
662	0	7816.23	19332.6	0		2.35072
663	0	7896.23	19332.6	0		2.59101
664	0	7976.23	19332.6	0		2.32229
665	0	8056.23	19332.6	0		2.49726
666	0	8136.23	19332.6	0		2.3856
667	0	8216.23	19332.6	0		2.50542
668	0	8296.23	19332.6	0		2.69573
669	0	8376.23	19332.6	0		2.51708
670	0	8456.23	19332.6	0		2.88569
671	0	8536.23	19332.6	0		2.38972
672	0	8616.23	19332.6	0		2.49472
673	0	8696.23	19332.6	0		2.33747
674	0	8776.23	19332.6	0		2.23869
675	0	8856.23	19332.6	0		2.30897
676	0	8936.23	19332.6	0		2.29824
677	0	9016.23	19332.6	0		2.24493
678	0	9096.23	19332.6	0		1.9879
679	0	9176.23	19332.6	0		1.99055
680	0	9256.23	19332.6	0		2.01615
681	0	9336.23	19332.6	0		2.07626
682	0	9416.23	19332.6	0		1.81434
683	0	9496.23	19332.6	0		1.87401
684	0	9576.23	19332.6	0		1.86989
685	0	9656.23	19332.6	0		1.81949
686	0	9736.23	19332.6	0		1.73108
687	0	9816.23	19332.6	0		1.87156
688	0	9896.23	19332.6	0		1.69993
689	0	9976.23	19332.6	0		1.9184
690	0	10056.2	19332.6	0		1.83782
691	0	10136.2	19332.6	0		1.68242
692	0	10216.2	19332.6	0		1.62407
693	0	10296.2	19332.6	0		1.87997
694	0	10376.2	19332.6	0		1.80131
695	0	10456.2	19332.6	0		1.79379
696	0	10536.2	19332.6	0		1.91632
697	0	10616.2	19332.6	0		2.01067
698	0	10696.2	19332.6	0		2.11996
699	0	10776.2	19332.6	0		2.36191
700	0	10856.2	19332.6	0		2.46253
701	0	10936.2	19332.6	0		2.58929
702	0	11016.2	19332.6	0		2.80925
703	0	11096.2	19332.6	0		2.83516
704	0	11176.2	19332.6	0		3.51075
705	0	11256.2	19332.6	0		3.52781
706	0	11336.2	19332.6	0		3.83035
707	0	11416.2	19332.6	0		4.10064
708	0	11496.2	19332.6	0		4.51389
709	0	11576.2	19332.6	0		4.28171
710	0	11656.2	19332.6	0		4.6446
711	0	11736.2	19332.6	0		4.87807
712	0	11816.2	19332.6	0		4.95247
713	0	11896.2	19332.6	0		5.19791
714	0	616.23	19252.6	0		2.60527
715	0	696.23	19252.6	0		2.78774
716	0	776.23	19252.6	0		2.26382
717	0	856.23	19252.6	0		2.30481
718	0	936.23	19252.6	0		2.31297
719	0	1016.23	19252.6	0		1.92463
720	0	1096.23	19252.6	0		2.02529
721	0	1176.23	19252.6	0		1.88871
722	0	1256.23	19252.6	0		1.87377
723	0	1336.23	19252.6	0		1.87758
724	0	1416.23	19252.6	0		1.9977
725	0	1496.23	19252.6	0		2.07759
726	0	1576.23	19252.6	0		2.03687
727	0	1656.23	19252.6	0		2.09687
728	0	1736.23	19252.6	0		2.16126
729	0	1816.23	19252.6	0		2.03741
730	0	1896.23	19252.6	0		1.99866
731	0	1976.23	19252.6	0		1.89821
732	0	2056.23	19252.6	0		2.14357
733	0	2136.23	19252.6	0		2.08179
734	0	2216.23	19252.6	0		2.15524
735	0	2296.23	19252.6	0		1.9702
736	0	2376.23	19252.6	0		2.03092
737	0	2456.23	19252.6	0		1.98376
738	0	2536.23	19252.6	0		2.17884
739	0	2616.23	19252.6	0		2.21225
740	0	2696.23	19252.6	0		1.88269
741	0	2776.23	19252.6	0		1.87199
742	0	2856.23	19252.6	0		2.11118
743	0	2936.23	19252.6	0		2.114
744	0	3016.23	19252.6	0		1.9373
745	0	3096.23	19252.6	0		2.09819
746	0	3176.23	19252.6	0		1.88032
747	0	3256.23	19252.6	0		1.75203
748	0	3336.23	19252.6	0		2.01355
749	0	3416.23	19252.6	0		1.91104
750	0	3496.23	19252.6	0		1.82697
751	0	3576.23	19252.6	0		1.88391
752	0	3656.23	19252.6	0		1.91421
753	0	3736.23	19252.6	0		1.96601
754	0	3816.23	19252.6	0		1.85519
755	0	3896.23	19252.6	0		1.94293
756	0	3976.23	19252.6	0		1.98027
757	0	4056.23	19252.6	0		1.87886
758	0	4136.23	19252.6	0		2.21455
759	0	4216.23	19252.6	0		1.99089
760	0	4296.23	19252.6	0		1.82957
761	0	4376.23	19252.6	0		2.02374
762	0	4456.23	19252.6	0		2.0504
763	0	4536.23	19252.6	0		2.28112
764	0	4616.23	19252.6	0		1.93355
765	0	4696.23	19252.6	0		2.08801
766	0	4776.23	19252.6	0		2.17507
767	0	4856.23	19252.6	0		2.15123
768	0	4936.23	19252.6	0		2.34979
769	0	5016.23	19252.6	0		2.13775
770	0	5096.23	19252.6	0		2.3033
771	0	5176.23	19252.6	0		2.44378
772	0	5256.23	19252.6	0		2.40686
773	0	5336.23	19252.6	0		2.33376
774	0	5416.23	19252.6	0		2.47936
775	0	5496.23	19252.6	0		2.58222
776	0	5576.23	19252.6	0		2.58096
777	0	5656.23	19252.6	0		2.48405
778	0	5736.23	19252.6	0		2.66723
779	0	5816.23	19252.6	0		2.44881
780	0	5896.23	19252.6	0		2.55455
781	0	5976.23	19252.6	0		2.57139
782	0	6056.23	19252.6	0		2.35115
783	0	6136.23	19252.6	0		2.46693
784	0	6216.23	19252.6	0		2.1684
785	0	6296.23	19252.6	0		2.58732
786	0	6376.23	19252.6	0		2.49445
787	0	6456.23	19252.6	0		2.48334
788	0	6536.23	19252.6	0		2.44021
789	0	6616.23	19252.6	0		2.33518
790	0	6696.23	19252.6	0		2.3599
791	0	6776.23	19252.6	0		2.30392
792	0	6856.23	19252.6	0		2.13232
793	0	6936.23	19252.6	0		2.16132
794	0	7016.23	19252.6	0		2.22001
795	0	7096.23	19252.6	0		2.0802
796	0	7176.23	19252.6	0		1.96683
797	0	7256.23	19252.6	0		2.01267
798	0	7336.23	19252.6	0		1.95692
799	0	7416.23	19252.6	0		2.00703
800	0	7496.23	19252.6	0		1.96791
801	0	7576.23	19252.6	0		2.07095
802	0	7656.23	19252.6	0		2.10332
803	0	7736.23	19252.6	0		2.14504
804	0	7816.23	19252.6	0		2.09729
805	0	7896.23	19252.6	0		2.41341
806	0	7976.23	19252.6	0		2.38569
807	0	8056.23	19252.6	0		2.56379
808	0	8136.23	19252.6	0		2.57606
809	0	8216.23	19252.6	0		2.5414
810	0	8296.23	19252.6	0		2.52771
811	0	8376.23	19252.6	0		2.33841
812	0	8456.23	19252.6	0		2.29037
813	0	8536.23	19252.6	0		2.51787
814	0	8616.23	19252.6	0		2.39999
815	0	8696.23	19252.6	0		2.41884
816	0	8776.23	19252.6	0		2.28684
817	0	8856.23	19252.6	0		2.37242
818	0	8936.23	19252.6	0		2.23365
819	0	9016.23	19252.6	0		2.19084
820	0	9096.23	19252.6	0		2.03259
821	0	9176.23	19252.6	0		2.02889
822	0	9256.23	19252.6	0		2.02402
823	0	9336.23	19252.6	0		2.05454
824	0	9416.23	19252.6	0		2.04469
825	0	9496.23	19252.6	0		1.88757
826	0	9576.23	19252.6	0		1.87132
827	0	9656.23	19252.6	0		1.82085
828	0	9736.23	19252.6	0		1.72945
829	0	9816.23	19252.6	0		1.69088
830	0	9896.23	19252.6	0		1.61603
831	0	9976.23	19252.6	0		1.84438
832	0	10056.2	19252.6	0		1.72154
833	0	10136.2	19252.6	0		1.70219
834	0	10216.2	19252.6	0		1.79631
835	0	10296.2	19252.6	0		1.90353
836	0	10376.2	19252.6	0		2.03354
837	0	10456.2	19252.6	0		1.99022
838	0	10536.2	19252.6	0		1.9768
839	0	10616.2	19252.6	0		2.15163
840	0	10696.2	19252.6	0		2.12137
841	0	10776.2	19252.6	0		2.34382
842	0	10856.2	19252.6	0		2.62997
843	0	10936.2	19252.6	0		2.67177
844	0	11016.2	19252.6	0		2.79646
845	0	11096.2	19252.6	0		3.05979
846	0	11176.2	19252.6	0		3.65377
847	0	11256.2	19252.6	0		3.6705
848	0	11336.2	19252.6	0		4.07627
849	0	11416.2	19252.6	0		4.08996
850	0	11496.2	19252.6	0		4.07664
851	0	11576.2	19252.6	0		4.58131
852	0	11656.2	19252.6	0		4.6997
853	0	11736.2	19252.6	0		5.1095
854	0	11816.2	19252.6	0		4.87099
855	0	11896.2	19252.6	0		5.26139
856	0	11976.2	19252.6	0		5.50448
857	0	616.23	19172.6	0		2.61828
858	0	696.23	19172.6	0		2.36972
859	0	776.23	19172.6	0		2.46341
860	0	856.23	19172.6	0		2.28302
861	0	936.23	19172.6	0		2.32177
862	0	1016.23	19172.6	0		2.17383
863	0	1096.23	19172.6	0		2.04182
864	0	1176.23	19172.6	0		1.966
865	0	1256.23	19172.6	0		1.89455
866	0	1336.23	19172.6	0		1.79916
867	0	1416.23	19172.6	0		1.72475
868	0	1496.23	19172.6	0		1.92324
869	0	1576.23	19172.6	0		1.85187
870	0	1656.23	19172.6	0		1.71729
871	0	1736.23	19172.6	0		1.74801
872	0	1816.23	19172.6	0		1.66404
873	0	1896.23	19172.6	0		1.89988
874	0	1976.23	19172.6	0		1.96237
875	0	2056.23	19172.6	0		1.83715
876	0	2136.23	19172.6	0		1.90151
877	0	2216.23	19172.6	0		1.98198
878	0	2296.23	19172.6	0		1.91304
879	0	2376.23	19172.6	0		2.18167
880	0	2456.23	19172.6	0		2.00137
881	0	2536.23	19172.6	0		2.34864
882	0	2616.23	19172.6	0		2.14784
883	0	2696.23	19172.6	0		1.82034
884	0	2776.23	19172.6	0		2.04221
885	0	2856.23	19172.6	0		2.12592
886	0	2936.23	19172.6	0		1.94068
887	0	3016.23	19172.6	0		1.89207
888	0	3096.23	19172.6	0		1.82936
889	0	3176.23	19172.6	0		1.8994
890	0	3256.23	19172.6	0		1.86818
891	0	3336.23	19172.6	0		1.93945
892	0	3416.23	19172.6	0		1.88338
893	0	3496.23	19172.6	0		1.76165
894	0	3576.23	19172.6	0		1.70204
895	0	3656.23	19172.6	0		1.75491
896	0	3736.23	19172.6	0		1.92729
897	0	3816.23	19172.6	0		1.81699
898	0	3896.23	19172.6	0		1.90915
899	0	3976.23	19172.6	0		2.14964
900	0	4056.23	19172.6	0		1.87958
901	0	4136.23	19172.6	0		1.92965
902	0	4216.23	19172.6	0		1.85165
903	0	4296.23	19172.6	0		1.90491
904	0	4376.23	19172.6	0		2.01407
905	0	4456.23	19172.6	0		1.90939
906	0	4536.23	19172.6	0		1.89013
907	0	4616.23	19172.6	0		1.68503
908	0	4696.23	19172.6	0		2.01599
909	0	4776.23	19172.6	0		1.82227
910	0	4856.23	19172.6	0		2.02911
911	0	4936.23	19172.6	0		1.95142
912	0	5016.23	19172.6	0		2.09049
913	0	5096.23	19172.6	0		2.08081
914	0	5176.23	19172.6	0		1.95031
915	0	5256.23	19172.6	0		1.98864
916	0	5336.23	19172.6	0		2.38006
917	0	5416.23	19172.6	0		2.71323
918	0	5496.23	19172.6	0		2.30878
919	0	5576.23	19172.6	0		2.54808
920	0	5656.23	19172.6	0		2.71234
921	0	5736.23	19172.6	0		2.85286
922	0	5816.23	19172.6	0		2.83718
923	0	5896.23	19172.6	0		2.48558
924	0	5976.23	19172.6	0		2.75164
925	0	6056.23	19172.6	0		2.21911
926	0	6136.23	19172.6	0		2.41157
927	0	6216.23	19172.6	0		2.46981
928	0	6296.23	19172.6	0		2.25463
929	0	6376.23	19172.6	0		2.43029
930	0	6456.23	19172.6	0		2.54473
931	0	6536.23	19172.6	0		2.52362
932	0	6616.23	19172.6	0		2.31366
933	0	6696.23	19172.6	0		2.30385
934	0	6776.23	19172.6	0		2.11312
935	0	6856.23	19172.6	0		2.27576
936	0	6936.23	19172.6	0		2.1885
937	0	7016.23	19172.6	0		2.27266
938	0	7096.23	19172.6	0		2.05437
939	0	7176.23	19172.6	0		2.02639
940	0	7256.23	19172.6	0		2.08161
941	0	7336.23	19172.6	0		2.1442
942	0	7416.23	19172.6	0		1.99055
943	0	7496.23	19172.6	0		2.01315
944	0	7576.23	19172.6	0		1.96834
945	0	7656.23	19172.6	0		1.93913
946	0	7736.23	19172.6	0		2.10906
947	0	7816.23	19172.6	0		2.1898
948	0	7896.23	19172.6	0		2.11303
949	0	7976.23	19172.6	0		2.28584
950	0	8056.23	19172.6	0		2.33727
951	0	8136.23	19172.6	0		2.57957
952	0	8216.23	19172.6	0		2.47551
953	0	8296.23	19172.6	0		2.42544
954	0	8376.23	19172.6	0		2.19879
955	0	8456.23	19172.6	0		2.36942
956	0	8536.23	19172.6	0		2.34652
957	0	8616.23	19172.6	0		2.22212
958	0	8696.23	19172.6	0		2.42196
959	0	8776.23	19172.6	0		2.20035
960	0	8856.23	19172.6	0		2.25468
961	0	8936.23	19172.6	0		2.24761
962	0	9016.23	19172.6	0		2.05614
963	0	9096.23	19172.6	0		2.2645
964	0	9176.23	19172.6	0		2.08353
965	0	9256.23	19172.6	0		2.11747
966	0	9336.23	19172.6	0		2.06839
967	0	9416.23	19172.6	0		2.10303
968	0	9496.23	19172.6	0		1.90674
969	0	9576.23	19172.6	0		2.07197
970	0	9656.23	19172.6	0		1.77399
971	0	9736.23	19172.6	0		1.87584
972	0	9816.23	19172.6	0		1.93242
973	0	9896.23	19172.6	0		1.9925
974	0	9976.23	19172.6	0		1.81342
975	0	10056.2	19172.6	0		1.74978
976	0	10136.2	19172.6	0		1.9275
977	0	10216.2	19172.6	0		1.9565
978	0	10296.2	19172.6	0		1.895
979	0	10376.2	19172.6	0		1.89577
980	0	10456.2	19172.6	0		2.05737
981	0	10536.2	19172.6	0		2.13098
982	0	10616.2	19172.6	0		2.31238
983	0	10696.2	19172.6	0		2.41123
984	0	10776.2	19172.6	0		2.36226
985	0	10856.2	19172.6	0		2.74087
986	0	10936.2	19172.6	0		2.57476
987	0	11016.2	19172.6	0		3.02897
988	0	11096.2	19172.6	0		3.06855
989	0	11176.2	19172.6	0		3.3527
990	0	11256.2	19172.6	0		3.5666
991	0	11336.2	19172.6	0		4.00043
992	0	11416.2	19172.6	0		3.91601
993	0	11496.2	19172.6	0		4.17526
994	0	11576.2	19172.6	0		4.24052
995	0	11656.2	19172.6	0		4.87092
996	0	11736.2	19172.6	0		4.91543
997	0	11816.2	19172.6	0		5.24494
998	0	11896.2	19172.6	0		5.22076
999	0	11976.2	19172.6	0		5.38631
1000	0	616.23	19092.6	0		2.78877
1001	0	696.23	19092.6	0		2.72469
1002	0	776.23	19092.6	0		2.7636
1003	0	856.23	19092.6	0		2.79288
1004	0	936.23	19092.6	0		2.72997
1005	0	1016.23	19092.6	0		2.26207
1006	0	1096.23	19092.6	0		2.24862
1007	0	1176.23	19092.6	0		1.95894
1008	0	1256.23	19092.6	0		1.97622
1009	0	1336.23	19092.6	0		2.01271
1010	0	1416.23	19092.6	0		1.76456
1011	0	1496.23	19092.6	0		1.67084
1012	0	1576.23	19092.6	0		1.53261
1013	0	1656.23	19092.6	0		1.65541
1014	0	1736.23	19092.6	0		1.52764
1015	0	1816.23	19092.6	0		1.43995
1016	0	1896.23	19092.6	0		1.7532
1017	0	1976.23	19092.6	0		1.61128
1018	0	2056.23	19092.6	0		1.89304
1019	0	2136.23	19092.6	0		1.97988
1020	0	2216.23	19092.6	0		1.95833
1021	0	2296.23	19092.6	0		1.98565
1022	0	2376.23	19092.6	0		1.85101
1023	0	2456.23	19092.6	0		1.91396
1024	0	2536.23	19092.6	0		1.82938
1025	0	2616.23	19092.6	0		2.11692
1026	0	2696.23	19092.6	0		2.05911
1027	0	2776.23	19092.6	0		1.95855
1028	0	2856.23	19092.6	0		2.02846
1029	0	2936.23	19092.6	0		2.06306
1030	0	3016.23	19092.6	0		1.8259
1031	0	3096.23	19092.6	0		2.05111
1032	0	3176.23	19092.6	0		1.81279
1033	0	3256.23	19092.6	0		1.87175
1034	0	3336.23	19092.6	0		1.74211
1035	0	3416.23	19092.6	0		1.83783
1036	0	3496.23	19092.6	0		1.74972
1037	0	3576.23	19092.6	0		1.85148
1038	0	3656.23	19092.6	0		1.7917
1039	0	3736.23	19092.6	0		1.74976
1040	0	3816.23	19092.6	0		1.83623
1041	0	3896.23	19092.6	0		1.81061
1042	0	3976.23	19092.6	0		2.02924
1043	0	4056.23	19092.6	0		1.92072
1044	0	4136.23	19092.6	0		1.7915
1045	0	4216.23	19092.6	0		1.88623
1046	0	4296.23	19092.6	0		1.93683
1047	0	4376.23	19092.6	0		1.8465
1048	0	4456.23	19092.6	0		1.81491
1049	0	4536.23	19092.6	0		1.87166
1050	0	4616.23	19092.6	0		1.72746
1051	0	4696.23	19092.6	0		1.9569
1052	0	4776.23	19092.6	0		1.8399
1053	0	4856.23	19092.6	0		1.84196
1054	0	4936.23	19092.6	0		1.67102
1055	0	5016.23	19092.6	0		2.08196
1056	0	5096.23	19092.6	0		2.09739
1057	0	5176.23	19092.6	0		1.98821
1058	0	5256.23	19092.6	0		2.08791
1059	0	5336.23	19092.6	0		2.06891
1060	0	5416.23	19092.6	0		2.63685
1061	0	5496.23	19092.6	0		2.21864
1062	0	5576.23	19092.6	0		2.28633
1063	0	5656.23	19092.6	0		2.53988
1064	0	5736.23	19092.6	0		2.58795
1065	0	5816.23	19092.6	0		2.31759
1066	0	5896.23	19092.6	0		2.64451
1067	0	5976.23	19092.6	0		2.52511
1068	0	6056.23	19092.6	0		2.61531
1069	0	6136.23	19092.6	0		2.50724
1070	0	6216.23	19092.6	0		2.59785
1071	0	6296.23	19092.6	0		2.73842
1072	0	6376.23	19092.6	0		2.52707
1073	0	6456.23	19092.6	0		2.3834
1074	0	6536.23	19092.6	0		2.17035
1075	0	6616.23	19092.6	0		2.39413
1076	0	6696.23	19092.6	0		2.31396
1077	0	6776.23	19092.6	0		2.07225
1078	0	6856.23	19092.6	0		2.42444
1079	0	6936.23	19092.6	0		2.31087
1080	0	7016.23	19092.6	0		2.23559
1081	0	7096.23	19092.6	0		2.17096
1082	0	7176.23	19092.6	0		2.16636
1083	0	7256.23	19092.6	0		2.14292
1084	0	7336.23	19092.6	0		1.94463
1085	0	7416.23	19092.6	0		2.06693
1086	0	7496.23	19092.6	0		2.10617
1087	0	7576.23	19092.6	0		2.00063
1088	0	7656.23	19092.6	0		2.19616
1089	0	7736.23	19092.6	0		2.02278
1090	0	7816.23	19092.6	0		2.06675
1091	0	7896.23	19092.6	0		2.09028
1092	0	7976.23	19092.6	0		2.04717
1093	0	8056.23	19092.6	0		2.30566
1094	0	8136.23	19092.6	0		2.32981
1095	0	8216.23	19092.6	0		2.29621
1096	0	8296.23	19092.6	0		2.38121
1097	0	8376.23	19092.6	0		2.25911
1098	0	8456.23	19092.6	0		2.1461
1099	0	8536.23	19092.6	0		2.15637
1100	0	8616.23	19092.6	0		2.1964
1101	0	8696.23	19092.6	0		2.18178
1102	0	8776.23	19092.6	0		2.27115
1103	0	8856.23	19092.6	0		2.22754
1104	0	8936.23	19092.6	0		2.244
1105	0	9016.23	19092.6	0		2.21382
1106	0	9096.23	19092.6	0		2.31194
1107	0	9176.23	19092.6	0		2.37801
1108	0	9256.23	19092.6	0		2.20134
1109	0	9336.23	19092.6	0		2.19259
1110	0	9416.23	19092.6	0		2.08842
1111	0	9496.23	19092.6	0		1.97922
1112	0	9576.23	19092.6	0		2.09437
1113	0	9656.23	19092.6	0		1.86636
1114	0	9736.23	19092.6	0		1.86382
1115	0	9816.23	19092.6	0		1.87255
1116	0	9896.23	19092.6	0		1.87818
1117	0	9976.23	19092.6	0		1.95077
1118	0	10056.2	19092.6	0		1.89227
1119	0	10136.2	19092.6	0		1.86629
1120	0	10216.2	19092.6	0		2.02189
1121	0	10296.2	19092.6	0		2.17707
1122	0	10376.2	19092.6	0		2.14204
1123	0	10456.2	19092.6	0		2.09024
1124	0	10536.2	19092.6	0		2.45098
1125	0	10616.2	19092.6	0		2.26069
1126	0	10696.2	19092.6	0		2.56598
1127	0	10776.2	19092.6	0		2.48875
1128	0	10856.2	19092.6	0		2.74079
1129	0	10936.2	19092.6	0		3.24912
1130	0	11016.2	19092.6	0		3.12671
1131	0	11096.2	19092.6	0		3.43495
1132	0	11176.2	19092.6	0		3.27202
1133	0	11256.2	19092.6	0		3.85384
1134	0	11336.2	19092.6	0		3.93171
1135	0	11416.2	19092.6	0		4.13502
1136	0	11496.2	19092.6	0		4.23855
1137	0	11576.2	19092.6	0		4.40788
1138	0	11656.2	19092.6	0		4.61802
1139	0	11736.2	19092.6	0		4.71145
1140	0	11816.2	19092.6	0		4.59656
1141	0	11896.2	19092.6	0		4.89196
1142	0	11976.2	19092.6	0		5.25822
1143	0	12056.2	19092.6	0		5.0439
1144	0	616.23	19012.6	0		2.944
1145	0	696.23	19012.6	0		2.89945
1146	0	776.23	19012.6	0		2.72404
1147	0	856.23	19012.6	0		2.82004
1148	0	936.23	19012.6	0		2.90212
1149	0	1016.23	19012.6	0		2.58863
1150	0	1096.23	19012.6	0		2.77303
1151	0	1176.23	19012.6	0		2.32106
1152	0	1256.23	19012.6	0		2.13119
1153	0	1336.23	19012.6	0		1.82202
1154	0	1416.23	19012.6	0		1.75914
1155	0	1496.23	19012.6	0		1.56742
1156	0	1576.23	19012.6	0		1.52638
1157	0	1656.23	19012.6	0		1.35449
1158	0	1736.23	19012.6	0		1.46456
1159	0	1816.23	19012.6	0		1.44595
1160	0	1896.23	19012.6	0		1.5023
1161	0	1976.23	19012.6	0		1.53199
1162	0	2056.23	19012.6	0		1.51847
1163	0	2136.23	19012.6	0		1.6571
1164	0	2216.23	19012.6	0		1.69799
1165	0	2296.23	19012.6	0		2.08633
1166	0	2376.23	19012.6	0		2.00379
1167	0	2456.23	19012.6	0		2.02392
1168	0	2536.23	19012.6	0		1.91966
1169	0	2616.23	19012.6	0		2.21243
1170	0	2696.23	19012.6	0		1.74776
1171	0	2776.23	19012.6	0		1.84354
1172	0	2856.23	19012.6	0		1.89331
1173	0	2936.23	19012.6	0		1.92309
1174	0	3016.23	19012.6	0		2.16067
1175	0	3096.23	19012.6	0		2.02204
1176	0	3176.23	19012.6	0		1.68763
1177	0	3256.23	19012.6	0		1.6639
1178	0	3336.23	19012.6	0		1.65835
1179	0	3416.23	19012.6	0		1.67847
1180	0	3496.23	19012.6	0		1.75963
1181	0	3576.23	19012.6	0		1.69595
1182	0	3656.23	19012.6	0		1.96895
1183	0	3736.23	19012.6	0		1.87611
1184	0	3816.23	19012.6	0		1.80627
1185	0	3896.23	19012.6	0		1.87483
1186	0	3976.23	19012.6	0		1.83737
1187	0	4056.23	19012.6	0		1.91505
1188	0	4136.23	19012.6	0		1.99196
1189	0	4216.23	19012.6	0		1.74634
1190	0	4296.23	19012.6	0		1.93619
1191	0	4376.23	19012.6	0		1.78411
1192	0	4456.23	19012.6	0		1.70195
1193	0	4536.23	19012.6	0		1.78152
1194	0	4616.23	19012.6	0		1.83137
1195	0	4696.23	19012.6	0		1.91927
1196	0	4776.23	19012.6	0		1.85203
1197	0	4856.23	19012.6	0		1.61838
1198	0	4936.23	19012.6	0		1.7334
1199	0	5016.23	19012.6	0		1.74693
1200	0	5096.23	19012.6	0		1.8697
1201	0	5176.23	19012.6	0		2.00392
1202	0	5256.23	19012.6	0		1.92854
1203	0	5336.23	19012.6	0		2.07054
1204	0	5416.23	19012.6	0		2.19655
1205	0	5496.23	19012.6	0		2.21201
1206	0	5576.23	19012.6	0		2.69495
1207	0	5656.23	19012.6	0		2.56463
1208	0	5736.23	19012.6	0		2.46863
1209	0	5816.23	19012.6	0		2.63444
1210	0	5896.23	19012.6	0		2.55557
1211	0	5976.23	19012.6	0		2.47248
1212	0	6056.23	19012.6	0		2.61807
1213	0	6136.23	19012.6	0		2.65215
1214	0	6216.23	19012.6	0		2.6022
1215	0	6296.23	19012.6	0		2.76167
1216	0	6376.23	19012.6	0		2.73662
1217	0	6456.23	19012.6	0		2.41514
1218	0	6536.23	19012.6	0		2.37282
1219	0	6616.23	19012.6	0		2.30009
1220	0	6696.23	19012.6	0		2.1036
1221	0	6776.23	19012.6	0		2.34585
1222	0	6856.23	19012.6	0		2.15017
1223	0	6936.23	19012.6	0		2.21983
1224	0	7016.23	19012.6	0		2.045
1225	0	7096.23	19012.6	0		2.11036
1226	0	7176.23	19012.6	0		2.024
1227	0	7256.23	19012.6	0		2.19439
1228	0	7336.23	19012.6	0		2.09783
1229	0	7416.23	19012.6	0		2.12606
1230	0	7496.23	19012.6	0		2.07838
1231	0	7576.23	19012.6	0		1.91605
1232	0	7656.23	19012.6	0		1.94646
1233	0	7736.23	19012.6	0		1.901
1234	0	7816.23	19012.6	0		2.01547
1235	0	7896.23	19012.6	0		2.17575
1236	0	7976.23	19012.6	0		2.16379
1237	0	8056.23	19012.6	0		2.24083
1238	0	8136.23	19012.6	0		2.19412
1239	0	8216.23	19012.6	0		2.33217
1240	0	8296.23	19012.6	0		2.20092
1241	0	8376.23	19012.6	0		2.23993
1242	0	8456.23	19012.6	0		2.18447
1243	0	8536.23	19012.6	0		2.14713
1244	0	8616.23	19012.6	0		2.28677
1245	0	8696.23	19012.6	0		2.19941
1246	0	8776.23	19012.6	0		2.18455
1247	0	8856.23	19012.6	0		2.1863
1248	0	8936.23	19012.6	0		2.22087
1249	0	9016.23	19012.6	0		2.34366
1250	0	9096.23	19012.6	0		2.30344
1251	0	9176.23	19012.6	0		2.26207
1252	0	9256.23	19012.6	0		2.08504
1253	0	9336.23	19012.6	0		2.1101
1254	0	9416.23	19012.6	0		2.2711
1255	0	9496.23	19012.6	0		1.92399
1256	0	9576.23	19012.6	0		1.98924
1257	0	9656.23	19012.6	0		1.90616
1258	0	9736.23	19012.6	0		1.75331
1259	0	9816.23	19012.6	0		1.91542
1260	0	9896.23	19012.6	0		1.85276
1261	0	9976.23	19012.6	0		1.98119
1262	0	10056.2	19012.6	0		1.97294
1263	0	10136.2	19012.6	0		1.88925
1264	0	10216.2	19012.6	0		1.98832
1265	0	10296.2	19012.6	0		2.00674
1266	0	10376.2	19012.6	0		2.2217
1267	0	10456.2	19012.6	0		2.35135
1268	0	10536.2	19012.6	0		2.54765
1269	0	10616.2	19012.6	0		2.67202
1270	0	10696.2	19012.6	0		2.62598
1271	0	10776.2	19012.6	0		2.74144
1272	0	10856.2	19012.6	0		3.04527
1273	0	10936.2	19012.6	0		3.40562
1274	0	11016.2	19012.6	0		3.06621
1275	0	11096.2	19012.6	0		3.43995
1276	0	11176.2	19012.6	0		3.79112
1277	0	11256.2	19012.6	0		3.80734
1278	0	11336.2	19012.6	0		4.2002
1279	0	11416.2	19012.6	0		4.14577
1280	0	11496.2	19012.6	0		4.21804
1281	0	11576.2	19012.6	0		4.18533
1282	0	11656.2	19012.6	0		4.64284
1283	0	11736.2	19012.6	0		4.89901
1284	0	11816.2	19012.6	0		5.11384
1285	0	11896.2	19012.6	0		4.97748
1286	0	11976.2	19012.6	0		4.40486
1287	0	12056.2	19012.6	0		4.01065
1288	0	616.23	18932.6	0		3.07695
1289	0	696.23	18932.6	0		3.15068
1290	0	776.23	18932.6	0		3.40508
1291	0	856.23	18932.6	0		3.81465
1292	0	936.23	18932.6	0		2.81494
1293	0	1016.23	18932.6	0		2.67616
1294	0	1096.23	18932.6	0		2.62372
1295	0	1176.23	18932.6	0		2.40709
1296	0	1256.23	18932.6	0		2.25905
1297	0	1336.23	18932.6	0		1.93087
1298	0	1416.23	18932.6	0		1.75546
1299	0	1496.23	18932.6	0		1.7006
1300	0	1576.23	18932.6	0		1.60658
1301	0	1656.23	18932.6	0		1.42476
1302	0	1736.23	18932.6	0		1.28902
1303	0	1816.23	18932.6	0		1.38929
1304	0	1896.23	18932.6	0		1.3364
1305	0	1976.23	18932.6	0		1.40941
1306	0	2056.23	18932.6	0		1.42498
1307	0	2136.23	18932.6	0		1.46527
1308	0	2216.23	18932.6	0		1.76266
1309	0	2296.23	18932.6	0		1.76058
1310	0	2376.23	18932.6	0		1.79659
1311	0	2456.23	18932.6	0		2.11169
1312	0	2536.23	18932.6	0		1.95488
1313	0	2616.23	18932.6	0		1.91956
1314	0	2696.23	18932.6	0		2.03857
1315	0	2776.23	18932.6	0		1.92408
1316	0	2856.23	18932.6	0		1.87194
1317	0	2936.23	18932.6	0		1.96474
1318	0	3016.23	18932.6	0		1.97812
1319	0	3096.23	18932.6	0		1.9327
1320	0	3176.23	18932.6	0		1.88504
1321	0	3256.23	18932.6	0		1.70181
1322	0	3336.23	18932.6	0		1.76663
1323	0	3416.23	18932.6	0		1.73142
1324	0	3496.23	18932.6	0		1.639
1325	0	3576.23	18932.6	0		1.77927
1326	0	3656.23	18932.6	0		1.63271
1327	0	3736.23	18932.6	0		1.83827
1328	0	3816.23	18932.6	0		1.62947
1329	0	3896.23	18932.6	0		1.76624
1330	0	3976.23	18932.6	0		1.65118
1331	0	4056.23	18932.6	0		1.835
1332	0	4136.23	18932.6	0		1.71633
1333	0	4216.23	18932.6	0		1.95439
1334	0	4296.23	18932.6	0		1.74817
1335	0	4376.23	18932.6	0		1.75813
1336	0	4456.23	18932.6	0		1.75686
1337	0	4536.23	18932.6	0		1.7638
1338	0	4616.23	18932.6	0		1.8515
1339	0	4696.23	18932.6	0		1.74177
1340	0	4776.23	18932.6	0		1.69555
1341	0	4856.23	18932.6	0		1.61587
1342	0	4936.23	18932.6	0		1.64234
1343	0	5016.23	18932.6	0		1.67323
1344	0	5096.23	18932.6	0		1.82557
1345	0	5176.23	18932.6	0		2.07357
1346	0	5256.23	18932.6	0		1.82508
1347	0	5336.23	18932.6	0		2.16083
1348	0	5416.23	18932.6	0		2.19828
1349	0	5496.23	18932.6	0		2.44765
1350	0	5576.23	18932.6	0		2.38594
1351	0	5656.23	18932.6	0		2.43554
1352	0	5736.23	18932.6	0		2.59743
1353	0	5816.23	18932.6	0		2.49337
1354	0	5896.23	18932.6	0		2.6096
1355	0	5976.23	18932.6	0		2.67315
1356	0	6056.23	18932.6	0		2.46907
1357	0	6136.23	18932.6	0		2.65317
1358	0	6216.23	18932.6	0		2.27859
1359	0	6296.23	18932.6	0		2.70472
1360	0	6376.23	18932.6	0		2.53782
1361	0	6456.23	18932.6	0		2.64857
1362	0	6536.23	18932.6	0		2.33881
1363	0	6616.23	18932.6	0		2.32017
1364	0	6696.23	18932.6	0		2.16931
1365	0	6776.23	18932.6	0		2.08661
1366	0	6856.23	18932.6	0		2.15688
1367	0	6936.23	18932.6	0		2.21434
1368	0	7016.23	18932.6	0		2.13987
1369	0	7096.23	18932.6	0		2.01218
1370	0	7176.23	18932.6	0		1.94685
1371	0	7256.23	18932.6	0		1.97077
1372	0	7336.23	18932.6	0		2.00354
1373	0	7416.23	18932.6	0		2.12541
1374	0	7496.23	18932.6	0		1.9854
1375	0	7576.23	18932.6	0		2.0206
1376	0	7656.23	18932.6	0		2.19604
1377	0	7736.23	18932.6	0		2.07976
1378	0	7816.23	18932.6	0		2.17384
1379	0	7896.23	18932.6	0		2.11858
1380	0	7976.23	18932.6	0		2.19549
1381	0	8056.23	18932.6	0		2.22823
1382	0	8136.23	18932.6	0		2.19522
1383	0	8216.23	18932.6	0		2.22511
1384	0	8296.23	18932.6	0		2.10062
1385	0	8376.23	18932.6	0		2.07666
1386	0	8456.23	18932.6	0		2.14733
1387	0	8536.23	18932.6	0		2.05107
1388	0	8616.23	18932.6	0		1.98183
1389	0	8696.23	18932.6	0		2.14662
1390	0	8776.23	18932.6	0		1.98362
1391	0	8856.23	18932.6	0		2.13744
1392	0	8936.23	18932.6	0		2.10297
1393	0	9016.23	18932.6	0		2.25637
1394	0	9096.23	18932.6	0		2.19047
1395	0	9176.23	18932.6	0		2.15824
1396	0	9256.23	18932.6	0		2.13708
1397	0	9336.23	18932.6	0		2.01774
1398	0	9416.23	18932.6	0		2.10631
1399	0	9496.23	18932.6	0		1.96663
1400	0	9576.23	18932.6	0		2.15451
1401	0	9656.23	18932.6	0		1.95751
1402	0	9736.23	18932.6	0		1.7658
1403	0	9816.23	18932.6	0		2.07903
1404	0	9896.23	18932.6	0		2.00046
1405	0	9976.23	18932.6	0		2.11547
1406	0	10056.2	18932.6	0		2.04247
1407	0	10136.2	18932.6	0		1.92706
1408	0	10216.2	18932.6	0		2.07987
1409	0	10296.2	18932.6	0		2.14608
1410	0	10376.2	18932.6	0		2.39185
1411	0	10456.2	18932.6	0		2.48473
1412	0	10536.2	18932.6	0		2.35734
1413	0	10616.2	18932.6	0		2.86715
1414	0	10696.2	18932.6	0		3.02353
1415	0	10776.2	18932.6	0		3.03576
1416	0	10856.2	18932.6	0		3.11849
1417	0	10936.2	18932.6	0		3.19568
1418	0	11016.2	18932.6	0		3.44976
1419	0	11096.2	18932.6	0		3.55731
1420	0	11176.2	18932.6	0		3.66825
1421	0	11256.2	18932.6	0		3.87734
1422	0	11336.2	18932.6	0		4.01114
1423	0	11416.2	18932.6	0		4.21541
1424	0	11496.2	18932.6	0		4.57568
1425	0	11576.2	18932.6	0		4.42884
1426	0	11656.2	18932.6	0		4.69495
1427	0	11736.2	18932.6	0		4.25322
1428	0	11816.2	18932.6	0		4.80036
1429	0	11896.2	18932.6	0		4.43571
1430	0	11976.2	18932.6	0		4.08971
1431	0	12056.2	18932.6	0		4.2302
1432	0	12136.2	18932.6	0		4.59851
1433	0	616.23	18852.6	0		3.5305
1434	0	696.23	18852.6	0		3.04412
1435	0	776.23	18852.6	0		3.27227
1436	0	856.23	18852.6	0		2.93533
1437	0	936.23	18852.6	0		3.28324
1438	0	1016.23	18852.6	0		2.79942
1439	0	1096.23	18852.6	0		2.97309
1440	0	1176.23	18852.6	0		2.42036
1441	0	1256.23	18852.6	0		2.23488
1442	0	1336.23	18852.6	0		2.37715
1443	0	1416.23	18852.6	0		1.77113
1444	0	1496.23	18852.6	0		1.66173
1445	0	1576.23	18852.6	0		1.58847
1446	0	1656.23	18852.6	0		1.47325
1447	0	1736.23	18852.6	0		1.3101
1448	0	1816.23	18852.6	0		1.32678
1449	0	1896.23	18852.6	0		1.27842
1450	0	1976.23	18852.6	0		1.333
1451	0	2056.23	18852.6	0		1.29968
1452	0	2136.23	18852.6	0		1.42639
1453	0	2216.23	18852.6	0		1.69642
1454	0	2296.23	18852.6	0		1.62337
1455	0	2376.23	18852.6	0		1.87817
1456	0	2456.23	18852.6	0		1.92994
1457	0	2536.23	18852.6	0		2.00567
1458	0	2616.23	18852.6	0		1.86765
1459	0	2696.23	18852.6	0		1.85164
1460	0	2776.23	18852.6	0		1.77695
1461	0	2856.23	18852.6	0		1.88478
1462	0	2936.23	18852.6	0		1.9519
1463	0	3016.23	18852.6	0		1.74794
1464	0	3096.23	18852.6	0		1.78937
1465	0	3176.23	18852.6	0		1.7745
1466	0	3256.23	18852.6	0		1.71184
1467	0	3336.23	18852.6	0		1.75383
1468	0	3416.23	18852.6	0		1.89641
1469	0	3496.23	18852.6	0		1.77839
1470	0	3576.23	18852.6	0		1.6123
1471	0	3656.23	18852.6	0		1.64817
1472	0	3736.23	18852.6	0		1.75023
1473	0	3816.23	18852.6	0		1.67716
1474	0	3896.23	18852.6	0		1.72541
1475	0	3976.23	18852.6	0		1.74564
1476	0	4056.23	18852.6	0		1.83477
1477	0	4136.23	18852.6	0		1.65327
1478	0	4216.23	18852.6	0		1.96927
1479	0	4296.23	18852.6	0		1.77318
1480	0	4376.23	18852.6	0		1.91325
1481	0	4456.23	18852.6	0		1.83757
1482	0	4536.23	18852.6	0		1.90765
1483	0	4616.23	18852.6	0		1.65249
1484	0	4696.23	18852.6	0		1.58846
1485	0	4776.23	18852.6	0		1.63511
1486	0	4856.23	18852.6	0		1.58057
1487	0	4936.23	18852.6	0		1.81725
1488	0	5016.23	18852.6	0		1.74672
1489	0	5096.23	18852.6	0		1.8099
1490	0	5176.23	18852.6	0		1.87915
1491	0	5256.23	18852.6	0		1.95971
1492	0	5336.23	18852.6	0		2.06252
1493	0	5416.23	18852.6	0		2.04811
1494	0	5496.23	18852.6	0		2.31663
1495	0	5576.23	18852.6	0		2.22763
1496	0	5656.23	18852.6	0		2.20837
1497	0	5736.23	18852.6	0		2.72199
1498	0	5816.23	18852.6	0		2.4224
1499	0	5896.23	18852.6	0		2.38415
1500	0	5976.23	18852.6	0		2.12029
1501	0	6056.23	18852.6	0		2.46869
1502	0	6136.23	18852.6	0		2.38338
1503	0	6216.23	18852.6	0		2.47093
1504	0	6296.23	18852.6	0		2.35015
1505	0	6376.23	18852.6	0		2.51136
1506	0	6456.23	18852.6	0		2.63164
1507	0	6536.23	18852.6	0		2.37094
1508	0	6616.23	18852.6	0		2.19717
1509	0	6696.23	18852.6	0		2.19063
1510	0	6776.23	18852.6	0		2.08222
1511	0	6856.23	18852.6	0		2.1064
1512	0	6936.23	18852.6	0		2.22348
1513	0	7016.23	18852.6	0		2.29599
1514	0	7096.23	18852.6	0		2.0781
1515	0	7176.23	18852.6	0		2.02851
1516	0	7256.23	18852.6	0		2.17066
1517	0	7336.23	18852.6	0		2.18437
1518	0	7416.23	18852.6	0		2.00836
1519	0	7496.23	18852.6	0		2.02748
1520	0	7576.23	18852.6	0		1.95781
1521	0	7656.23	18852.6	0		2.09928
1522	0	7736.23	18852.6	0		2.02604
1523	0	7816.23	18852.6	0		2.08616
1524	0	7896.23	18852.6	0		2.16866
1525	0	7976.23	18852.6	0		2.16651
1526	0	8056.23	18852.6	0		2.2767
1527	0	8136.23	18852.6	0		2.28384
1528	0	8216.23	18852.6	0		2.50877
1529	0	8296.23	18852.6	0		2.08628
1530	0	8376.23	18852.6	0		2.14972
1531	0	8456.23	18852.6	0		2.18269
1532	0	8536.23	18852.6	0		2.2775
1533	0	8616.23	18852.6	0		2.14434
1534	0	8696.23	18852.6	0		1.83973
1535	0	8776.23	18852.6	0		2.10656
1536	0	8856.23	18852.6	0		2.34175
1537	0	8936.23	18852.6	0		2.01134
1538	0	9016.23	18852.6	0		2.32385
1539	0	9096.23	18852.6	0		2.2373
1540	0	9176.23	18852.6	0		2.2464
1541	0	9256.23	18852.6	0		2.24077
1542	0	9336.23	18852.6	0		2.03824
1543	0	9416.23	18852.6	0		2.14238
1544	0	9496.23	18852.6	0		2.1425
1545	0	9576.23	18852.6	0		2.17203
1546	0	9656.23	18852.6	0		2.17174
1547	0	9736.23	18852.6	0		2.07353
1548	0	9816.23	18852.6	0		2.01102
1549	0	9896.23	18852.6	0		2.02093
1550	0	9976.23	18852.6	0		1.9677
1551	0	10056.2	18852.6	0		2.09623
1552	0	10136.2	18852.6	0		1.9343
1553	0	10216.2	18852.6	0		2.21213
1554	0	10296.2	18852.6	0		2.48148
1555	0	10376.2	18852.6	0		2.51009
1556	0	10456.2	18852.6	0		2.39721
1557	0	10536.2	18852.6	0		2.50624
1558	0	10616.2	18852.6	0		2.7933
1559	0	10696.2	18852.6	0		2.88628
1560	0	10776.2	18852.6	0		3.16501
1561	0	10856.2	18852.6	0		3.4803
1562	0	10936.2	18852.6	0		3.17279
1563	0	11016.2	18852.6	0		3.40016
1564	0	11096.2	18852.6	0		3.54852
1565	0	11176.2	18852.6	0		3.65949
1566	0	11256.2	18852.6	0		3.94452
1567	0	11336.2	18852.6	0		3.94699
1568	0	11416.2	18852.6	0		4.46959
1569	0	11496.2	18852.6	0		4.05358
1570	0	11576.2	18852.6	0		4.54884
1571	0	11656.2	18852.6	0		4.59851
1572	0	11736.2	18852.6	0		4.55323
1573	0	11816.2	18852.6	0		5.02169
1574	0	11896.2	18852.6	0		4.44646
1575	0	11976.2	18852.6	0		3.69288
1576	0	12056.2	18852.6	0		3.53095
1577	0	12136.2	18852.6	0		3.65393
1578	0	616.23	18772.6	0		3.23522
1579	0	696.23	18772.6	0		3.2118
1580	0	776.23	18772.6	0		2.96287
1581	0	856.23	18772.6	0		2.63533
1582	0	936.23	18772.6	0		2.5459
1583	0	1016.23	18772.6	0		2.89554
1584	0	1096.23	18772.6	0		2.8464
1585	0	1176.23	18772.6	0		2.75693
1586	0	1256.23	18772.6	0		2.57846
1587	0	1336.23	18772.6	0		2.05388
1588	0	1416.23	18772.6	0		2.00534
1589	0	1496.23	18772.6	0		1.72842
1590	0	1576.23	18772.6	0		1.60109
1591	0	1656.23	18772.6	0		1.4135
1592	0	1736.23	18772.6	0		1.31955
1593	0	1816.23	18772.6	0		1.34791
1594	0	1896.23	18772.6	0		1.15649
1595	0	1976.23	18772.6	0		1.19535
1596	0	2056.23	18772.6	0		1.26852
1597	0	2136.23	18772.6	0		1.37328
1598	0	2216.23	18772.6	0		1.40246
1599	0	2296.23	18772.6	0		1.66151
1600	0	2376.23	18772.6	0		1.42117
1601	0	2456.23	18772.6	0		1.8439
1602	0	2536.23	18772.6	0		1.79182
1603	0	2616.23	18772.6	0		2.07595
1604	0	2696.23	18772.6	0		2.01323
1605	0	2776.23	18772.6	0		1.94843
1606	0	2856.23	18772.6	0		1.83044
1607	0	2936.23	18772.6	0		1.86927
1608	0	3016.23	18772.6	0		1.71463
1609	0	3096.23	18772.6	0		1.82089
1610	0	3176.23	18772.6	0		1.83592
1611	0	3256.23	18772.6	0		1.86014
1612	0	3336.23	18772.6	0		1.65604
1613	0	3416.23	18772.6	0		1.8323
1614	0	3496.23	18772.6	0		1.67584
1615	0	3576.23	18772.6	0		1.63798
1616	0	3656.23	18772.6	0		1.61043
1617	0	3736.23	18772.6	0		1.63637
1618	0	3816.23	18772.6	0		1.68977
1619	0	3896.23	18772.6	0		1.74049
1620	0	3976.23	18772.6	0		1.65121
1621	0	4056.23	18772.6	0		1.64407
1622	0	4136.23	18772.6	0		1.67611
1623	0	4216.23	18772.6	0		1.54725
1624	0	4296.23	18772.6	0		1.77449
1625	0	4376.23	18772.6	0		1.7211
1626	0	4456.23	18772.6	0		1.79458
1627	0	4536.23	18772.6	0		1.80453
1628	0	4616.23	18772.6	0		1.88417
1629	0	4696.23	18772.6	0		1.66041
1630	0	4776.23	18772.6	0		1.7098
1631	0	4856.23	18772.6	0		1.93467
1632	0	4936.23	18772.6	0		1.81727
1633	0	5016.23	18772.6	0		1.79929
1634	0	5096.23	18772.6	0		1.81949
1635	0	5176.23	18772.6	0		1.83863
1636	0	5256.23	18772.6	0		1.97857
1637	0	5336.23	18772.6	0		1.79064
1638	0	5416.23	18772.6	0		2.04565
1639	0	5496.23	18772.6	0		2.3193
1640	0	5576.23	18772.6	0		2.42727
1641	0	5656.23	18772.6	0		2.24944
1642	0	5736.23	18772.6	0		2.29291
1643	0	5816.23	18772.6	0		2.76903
1644	0	5896.23	18772.6	0		2.26469
1645	0	5976.23	18772.6	0		2.46268
1646	0	6056.23	18772.6	0		2.43216
1647	0	6136.23	18772.6	0		2.40649
1648	0	6216.23	18772.6	0		2.27873
1649	0	6296.23	18772.6	0		2.42965
1650	0	6376.23	18772.6	0		2.70256
1651	0	6456.23	18772.6	0		2.48809
1652	0	6536.23	18772.6	0		2.35629
1653	0	6616.23	18772.6	0		2.40737
1654	0	6696.23	18772.6	0		2.32426
1655	0	6776.23	18772.6	0		1.95283
1656	0	6856.23	18772.6	0		2.2141
1657	0	6936.23	18772.6	0		2.04759
1658	0	7016.23	18772.6	0		2.03472
1659	0	7096.23	18772.6	0		2.12225
1660	0	7176.23	18772.6	0		2.02378
1661	0	7256.23	18772.6	0		2.06662
1662	0	7336.23	18772.6	0		2.29934
1663	0	7416.23	18772.6	0		2.07386
1664	0	7496.23	18772.6	0		1.97123
1665	0	7576.23	18772.6	0		2.08259
1666	0	7656.23	18772.6	0		1.98107
1667	0	7736.23	18772.6	0		2.13831
1668	0	7816.23	18772.6	0		2.1161
1669	0	7896.23	18772.6	0		2.15257
1670	0	7976.23	18772.6	0		2.42092
1671	0	8056.23	18772.6	0		2.18049
1672	0	8136.23	18772.6	0		2.39192
1673	0	8216.23	18772.6	0		2.25635
1674	0	8296.23	18772.6	0		2.33917
1675	0	8376.23	18772.6	0		2.27717
1676	0	8456.23	18772.6	0		2.29283
1677	0	8536.23	18772.6	0		2.13813
1678	0	8616.23	18772.6	0		2.27525
1679	0	8696.23	18772.6	0		2.12959
1680	0	8776.23	18772.6	0		2.15871
1681	0	8856.23	18772.6	0		2.31533
1682	0	8936.23	18772.6	0		2.36302
1683	0	9016.23	18772.6	0		2.18158
1684	0	9096.23	18772.6	0		2.29149
1685	0	9176.23	18772.6	0		2.24079
1686	0	9256.23	18772.6	0		2.28162
1687	0	9336.23	18772.6	0		2.53191
1688	0	9416.23	18772.6	0		2.19574
1689	0	9496.23	18772.6	0		2.34864
1690	0	9576.23	18772.6	0		2.4366
1691	0	9656.23	18772.6	0		2.69237
1692	0	9736.23	18772.6	0		2.22692
1693	0	9816.23	18772.6	0		1.87613
1694	0	9896.23	18772.6	0		2.16185
1695	0	9976.23	18772.6	0		2.14106
1696	0	10056.2	18772.6	0		2.04005
1697	0	10136.2	18772.6	0		2.3437
1698	0	10216.2	18772.6	0		2.33378
1699	0	10296.2	18772.6	0		2.59306
1700	0	10376.2	18772.6	0		2.59712
1701	0	10456.2	18772.6	0		2.73003
1702	0	10536.2	18772.6	0		2.87239
1703	0	10616.2	18772.6	0		2.74758
1704	0	10696.2	18772.6	0		3.35012
1705	0	10776.2	18772.6	0		3.14044
1706	0	10856.2	18772.6	0		3.4241
1707	0	10936.2	18772.6	0		3.36645
1708	0	11016.2	18772.6	0		4.17362
1709	0	11096.2	18772.6	0		3.87358
1710	0	11176.2	18772.6	0		3.84183
1711	0	11256.2	18772.6	0		4.26089
1712	0	11336.2	18772.6	0		4.14337
1713	0	11416.2	18772.6	0		4.53682
1714	0	11496.2	18772.6	0		4.39886
1715	0	11576.2	18772.6	0		4.7384
1716	0	11656.2	18772.6	0		5.34644
1717	0	11736.2	18772.6	0		4.97869
1718	0	11816.2	18772.6	0		4.45622
1719	0	11896.2	18772.6	0		4.41255
1720	0	11976.2	18772.6	0		4.04964
1721	0	12056.2	18772.6	0		3.53085
1722	0	12136.2	18772.6	0		3.03019
1723	0	616.23	18692.6	0		2.93927
1724	0	696.23	18692.6	0		2.9282
1725	0	776.23	18692.6	0		3.59844
1726	0	856.23	18692.6	0		3.20197
1727	0	936.23	18692.6	0		2.98822
1728	0	1016.23	18692.6	0		2.46989
1729	0	1096.23	18692.6	0		2.90028
1730	0	1176.23	18692.6	0		2.23737
1731	0	1256.23	18692.6	0		2.83505
1732	0	1336.23	18692.6	0		2.12924
1733	0	1416.23	18692.6	0		1.94844
1734	0	1496.23	18692.6	0		1.84039
1735	0	1576.23	18692.6	0		1.73867
1736	0	1656.23	18692.6	0		1.6263
1737	0	1736.23	18692.6	0		1.48335
1738	0	1816.23	18692.6	0		1.31313
1739	0	1896.23	18692.6	0		1.37002
1740	0	1976.23	18692.6	0		1.24282
1741	0	2056.23	18692.6	0		1.25127
1742	0	2136.23	18692.6	0		1.3495
1743	0	2216.23	18692.6	0		1.23856
1744	0	2296.23	18692.6	0		1.48267
1745	0	2376.23	18692.6	0		1.52432
1746	0	2456.23	18692.6	0		1.74152
1747	0	2536.23	18692.6	0		1.99694
1748	0	2616.23	18692.6	0		1.87841
1749	0	2696.23	18692.6	0		2.02099
1750	0	2776.23	18692.6	0		1.86914
1751	0	2856.23	18692.6	0		1.8984
1752	0	2936.23	18692.6	0		1.88612
1753	0	3016.23	18692.6	0		1.70449
1754	0	3096.23	18692.6	0		1.84147
1755	0	3176.23	18692.6	0		1.58884
1756	0	3256.23	18692.6	0		1.83529
1757	0	3336.23	18692.6	0		1.63921
1758	0	3416.23	18692.6	0		1.78369
1759	0	3496.23	18692.6	0		1.65923
1760	0	3576.23	18692.6	0		1.56055
1761	0	3656.23	18692.6	0		1.60542
1762	0	3736.23	18692.6	0		1.63559
1763	0	3816.23	18692.6	0		1.64754
1764	0	3896.23	18692.6	0		1.53462
1765	0	3976.23	18692.6	0		1.66899
1766	0	4056.23	18692.6	0		1.64551
1767	0	4136.23	18692.6	0		1.61351
1768	0	4216.23	18692.6	0		1.86857
1769	0	4296.23	18692.6	0		1.56868
1770	0	4376.23	18692.6	0		1.74436
1771	0	4456.23	18692.6	0		1.71442
1772	0	4536.23	18692.6	0		1.75719
1773	0	4616.23	18692.6	0		1.6314
1774	0	4696.23	18692.6	0		1.71308
1775	0	4776.23	18692.6	0		1.82855
1776	0	4856.23	18692.6	0		1.83237
1777	0	4936.23	18692.6	0		1.71126
1778	0	5016.23	18692.6	0		1.74318
1779	0	5096.23	18692.6	0		1.79371
1780	0	5176.23	18692.6	0		1.92389
1781	0	5256.23	18692.6	0		1.97519
1782	0	5336.23	18692.6	0		1.83186
1783	0	5416.23	18692.6	0		2.00453
1784	0	5496.23	18692.6	0		2.13057
1785	0	5576.23	18692.6	0		2.21808
1786	0	5656.23	18692.6	0		2.16678
1787	0	5736.23	18692.6	0		2.23255
1788	0	5816.23	18692.6	0		2.27159
1789	0	5896.23	18692.6	0		2.62976
1790	0	5976.23	18692.6	0		2.27201
1791	0	6056.23	18692.6	0		2.08196
1792	0	6136.23	18692.6	0		2.11474
1793	0	6216.23	18692.6	0		2.418
1794	0	6296.23	18692.6	0		2.27077
1795	0	6376.23	18692.6	0		2.35174
1796	0	6456.23	18692.6	0		2.53575
1797	0	6536.23	18692.6	0		2.5833
1798	0	6616.23	18692.6	0		2.3956
1799	0	6696.23	18692.6	0		2.39648
1800	0	6776.23	18692.6	0		2.2179
1801	0	6856.23	18692.6	0		2.0387
1802	0	6936.23	18692.6	0		2.14852
1803	0	7016.23	18692.6	0		2.18174
1804	0	7096.23	18692.6	0		1.95162
1805	0	7176.23	18692.6	0		1.99283
1806	0	7256.23	18692.6	0		2.00929
1807	0	7336.23	18692.6	0		1.9209
1808	0	7416.23	18692.6	0		2.10486
1809	0	7496.23	18692.6	0		1.98631
1810	0	7576.23	18692.6	0		2.32302
1811	0	7656.23	18692.6	0		2.14742
1812	0	7736.23	18692.6	0		2.08442
1813	0	7816.23	18692.6	0		2.19837
1814	0	7896.23	18692.6	0		2.30411
1815	0	7976.23	18692.6	0		2.61152
1816	0	8056.23	18692.6	0		2.7305
1817	0	8136.23	18692.6	0		2.62722
1818	0	8216.23	18692.6	0		2.57685
1819	0	8296.23	18692.6	0		2.61042
1820	0	8376.23	18692.6	0		2.72552
1821	0	8456.23	18692.6	0		2.70738
1822	0	8536.23	18692.6	0		2.49059
1823	0	8616.23	18692.6	0		2.51174
1824	0	8696.23	18692.6	0		2.38064
1825	0	8776.23	18692.6	0		2.3498
1826	0	8856.23	18692.6	0		2.42601
1827	0	8936.23	18692.6	0		2.32723
1828	0	9016.23	18692.6	0		2.19738
1829	0	9096.23	18692.6	0		2.48629
1830	0	9176.23	18692.6	0		2.25215
1831	0	9256.23	18692.6	0		2.6623
1832	0	9336.23	18692.6	0		2.43606
1833	0	9416.23	18692.6	0		2.56327
1834	0	9496.23	18692.6	0		2.61175
1835	0	9576.23	18692.6	0		3.05617
1836	0	9656.23	18692.6	0		2.73362
1837	0	9736.23	18692.6	0		2.68456
1838	0	9816.23	18692.6	0		2.29509
1839	0	9896.23	18692.6	0		2.26948
1840	0	9976.23	18692.6	0		2.2503
1841	0	10056.2	18692.6	0		2.31877
1842	0	10136.2	18692.6	0		2.22162
1843	0	10216.2	18692.6	0		2.50065
1844	0	10296.2	18692.6	0		2.48158
1845	0	10376.2	18692.6	0		2.7707
1846	0	10456.2	18692.6	0		3.053
1847	0	10536.2	18692.6	0		2.82687
1848	0	10616.2	18692.6	0		3.15495
1849	0	10696.2	18692.6	0		3.39436
1850	0	10776.2	18692.6	0		3.70247
1851	0	10856.2	18692.6	0		3.40692
1852	0	10936.2	18692.6	0		3.69581
1853	0	11016.2	18692.6	0		3.50543
1854	0	11096.2	18692.6	0		4.14495
1855	0	11176.2	18692.6	0		3.80515
1856	0	11256.2	18692.6	0		3.85048
1857	0	11336.2	18692.6	0		4.11285
1858	0	11416.2	18692.6	0		4.58598
1859	0	11496.2	18692.6	0		4.61961
1860	0	11576.2	18692.6	0		4.59589
1861	0	11656.2	18692.6	0		4.88215
1862	0	11736.2	18692.6	0		5.3119
1863	0	11816.2	18692.6	0		4.72232
1864	0	11896.2	18692.6	0		4.3171
1865	0	11976.2	18692.6	0		4.10316
1866	0	12056.2	18692.6	0		3.70942
1867	0	12136.2	18692.6	0		3.6186
1868	0	856.23	18612.6	0		2.74512
1869	0	936.23	18612.6	0		2.57644
1870	0	1016.23	18612.6	0		3.70453
1871	0	1096.23	18612.6	0		2.52507
1872	0	1176.23	18612.6	0		2.26731
1873	0	1256.23	18612.6	0		2.21243
1874	0	1336.23	18612.6	0		2.25188
1875	0	1416.23	18612.6	0		2.10433
1876	0	1496.23	18612.6	0		2.01264
1877	0	1576.23	18612.6	0		1.86848
1878	0	1656.23	18612.6	0		1.70866
1879	0	1736.23	18612.6	0		1.51083
1880	0	1816.23	18612.6	0		1.42124
1881	0	1896.23	18612.6	0		1.37194
1882	0	1976.23	18612.6	0		1.23369
1883	0	2056.23	18612.6	0		1.21513
1884	0	2136.23	18612.6	0		1.29374
1885	0	2216.23	18612.6	0		1.30543
1886	0	2296.23	18612.6	0		1.29814
1887	0	2376.23	18612.6	0		1.31272
1888	0	2456.23	18612.6	0		1.46295
1889	0	2536.23	18612.6	0		1.60547
1890	0	2616.23	18612.6	0		1.81027
1891	0	2696.23	18612.6	0		1.94857
1892	0	2776.23	18612.6	0		1.64997
1893	0	2856.23	18612.6	0		1.71725
1894	0	2936.23	18612.6	0		1.66879
1895	0	3016.23	18612.6	0		1.85236
1896	0	3096.23	18612.6	0		1.91608
1897	0	3176.23	18612.6	0		1.60494
1898	0	3256.23	18612.6	0		1.65081
1899	0	3336.23	18612.6	0		1.60761
1900	0	3416.23	18612.6	0		1.66265
1901	0	3496.23	18612.6	0		1.55865
1902	0	3576.23	18612.6	0		1.73875
1903	0	3656.23	18612.6	0		1.64359
1904	0	3736.23	18612.6	0		1.68858
1905	0	3816.23	18612.6	0		1.6981
1906	0	3896.23	18612.6	0		1.6022
1907	0	3976.23	18612.6	0		1.571
1908	0	4056.23	18612.6	0		1.63312
1909	0	4136.23	18612.6	0		1.65462
1910	0	4216.23	18612.6	0		1.59318
1911	0	4296.23	18612.6	0		1.73575
1912	0	4376.23	18612.6	0		1.74394
1913	0	4456.23	18612.6	0		1.77311
1914	0	4536.23	18612.6	0		1.76081
1915	0	4616.23	18612.6	0		1.65219
1916	0	4696.23	18612.6	0		1.58559
1917	0	4776.23	18612.6	0		1.74859
1918	0	4856.23	18612.6	0		1.71877
1919	0	4936.23	18612.6	0		1.72519
1920	0	5016.23	18612.6	0		1.63667
1921	0	5096.23	18612.6	0		1.84828
1922	0	5176.23	18612.6	0		1.95111
1923	0	5256.23	18612.6	0		1.92537
1924	0	5336.23	18612.6	0		2.06127
1925	0	5416.23	18612.6	0		2.07651
1926	0	5496.23	18612.6	0		2.10549
1927	0	5576.23	18612.6	0		1.95313
1928	0	5656.23	18612.6	0		2.27589
1929	0	5736.23	18612.6	0		2.42918
1930	0	5816.23	18612.6	0		2.23008
1931	0	5896.23	18612.6	0		1.96111
1932	0	5976.23	18612.6	0		2.30871
1933	0	6056.23	18612.6	0		2.12441
1934	0	6136.23	18612.6	0		2.18949
1935	0	6216.23	18612.6	0		2.30282
1936	0	6296.23	18612.6	0		2.35589
1937	0	6376.23	18612.6	0		2.38442
1938	0	6456.23	18612.6	0		2.58629
1939	0	6536.23	18612.6	0		2.59349
1940	0	6616.23	18612.6	0		2.39657
1941	0	6696.23	18612.6	0		2.30896
1942	0	6776.23	18612.6	0		2.45733
1943	0	6856.23	18612.6	0		2.05991
1944	0	6936.23	18612.6	0		2.17953
1945	0	7016.23	18612.6	0		2.14955
1946	0	7096.23	18612.6	0		2.30838
1947	0	7176.23	18612.6	0		2.01178
1948	0	7256.23	18612.6	0		2.20003
1949	0	7336.23	18612.6	0		2.04464
1950	0	7416.23	18612.6	0		2.20773
1951	0	7496.23	18612.6	0		2.16026
1952	0	7576.23	18612.6	0		2.00894
1953	0	7656.23	18612.6	0		2.18069
1954	0	7736.23	18612.6	0		2.30032
1955	0	7816.23	18612.6	0		2.36102
1956	0	7896.23	18612.6	0		2.54463
1957	0	7976.23	18612.6	0		2.53367
1958	0	8056.23	18612.6	0		2.72065
1959	0	8136.23	18612.6	0		2.84329
1960	0	8216.23	18612.6	0		2.73702
1961	0	8296.23	18612.6	0		2.83072
1962	0	8376.23	18612.6	0		2.94293
1963	0	8456.23	18612.6	0		2.57184
1964	0	8536.23	18612.6	0		2.8594
1965	0	8616.23	18612.6	0		2.62133
1966	0	8696.23	18612.6	0		2.55532
1967	0	8776.23	18612.6	0		2.7903
1968	0	8856.23	18612.6	0		2.59356
1969	0	8936.23	18612.6	0		2.60211
1970	0	9016.23	18612.6	0		2.52768
1971	0	9096.23	18612.6	0		2.47946
1972	0	9176.23	18612.6	0		2.63433
1973	0	9256.23	18612.6	0		2.65273
1974	0	9336.23	18612.6	0		2.72652
1975	0	9416.23	18612.6	0		2.82467
1976	0	9496.23	18612.6	0		3.35556
1977	0	9576.23	18612.6	0		3.79413
1978	0	9656.23	18612.6	0		3.1305
1979	0	9736.23	18612.6	0		2.35073
1980	0	9816.23	18612.6	0		2.36555
1981	0	9896.23	18612.6	0		2.13574
1982	0	9976.23	18612.6	0		2.26504
1983	0	10056.2	18612.6	0		2.30297
1984	0	10136.2	18612.6	0		2.64584
1985	0	10216.2	18612.6	0		2.68806
1986	0	10296.2	18612.6	0		2.41637
1987	0	10376.2	18612.6	0		3.00101
1988	0	10456.2	18612.6	0		2.9678
1989	0	10536.2	18612.6	0		2.98822
1990	0	10616.2	18612.6	0		3.35436
1991	0	10696.2	18612.6	0		3.94896
1992	0	10776.2	18612.6	0		3.46131
1993	0	10856.2	18612.6	0		3.59274
1994	0	10936.2	18612.6	0		3.70932
1995	0	11016.2	18612.6	0		3.55681
1996	0	11096.2	18612.6	0		3.86508
1997	0	11176.2	18612.6	0		4.10144
1998	0	11256.2	18612.6	0		3.94678
[truncated: 55,452 more rows]
