# Supplementary material for: Untargeted pixel-by-pixel metabolite ratio imaging as a novel tool for biomedical discovery in mass spectrometry imaging
Source: eLife. 2025 Mar 18;13:RP96892. doi: 10.7554/eLife.96892 (PMC11919253; doi:10.7554/eLife.96892)
Supplement: Figure 7—source data 1. [file elife-96892-fig7-data1.xlsx]

## Sheet: Figure 7 A B C E 
spotId	raster	x	y	z	Date	Aspartate/Glutamine	Homocarnosine /Aspartate	Homocarnosine /Glutamine	Homocarnosine
0	0	3688	16226			0.79172	0.0972661	0.0770075	92104.8
1	0	3768	16226			0.966193	0.00173905	0.00168026	1766.85
2	0	3848	16226			0.912957	0.00175195	0.00159946	1766.85
3	0	3928	16226			1.00714	0.0803668	0.080941	88835.7
4	0	4008	16226			0.789077	0.113795	0.0897934	88818.8
5	0	4088	16226			0.938291	0.00346878	0.00325473	1766.85
6	0	4168	16226			0.955342	0.00507702	0.00485029	1766.85
7	0	4248	16226			1.21781	0.101853	0.124037	44108.2
8	0	4328	16226			1.02651	0.109103	0.111994	70257.8
9	0	4408	16226			1.13904	0.148513	0.169163	132624
10	0	4488	16226			1.00266	0.116595	0.116905	112630
11	0	4568	16226			1.13723	0.0789406	0.0897736	68705.7
12	0	4648	16226			1.23267	0.112119	0.138205	73334.9
13	0	4728	16226			1.46423	0.0544819	0.0797742	68204.3
14	0	4808	16226			1.10749	0.00536583	0.0059426	1766.85
15	0	4888	16226			1.08248	0.0135749	0.0146945	1766.85
16	0	4968	16226			1.52512	0.0219425	0.033465	1766.85
17	0	5048	16226			0.822852	0.0214	0.017609	1766.85
18	0	5128	16226			1.14173	0.00214691	0.00245119	1766.85
19	0	5208	16226			0.578737	1.29411	0.748947	1766.85
20	0	5288	16226			0.006325	1.29411	0.00818548	1766.85
21	0	5368	16226			49.5723	0.0151082	0.748947	1766.85
22	0	5448	16226			0.578737	1.29411	0.748947	1766.85
23	0	5528	16226			0.791714	0.00571846	0.00452739	1766.85
24	0	5608	16226			0.006231	1.29411	0.00806346	1766.85
25	0	5688	16226			0.578737	1.29411	0.748947	1766.85
26	0	5768	16226			0.694731	0.0528598	0.0367233	1766.85
27	0	5848	16226			0.578737	1.29411	0.748947	1766.85
28	0	3208	16146			1.04437	0.0924191	0.0965193	75512.1
29	0	3288	16146			1.22896	0.0829804	0.10198	73723.6
30	0	3368	16146			0.916544	0.00163977	0.00150292	1766.85
31	0	3448	16146			1.05366	0.00149574	0.00157601	1766.85
32	0	3528	16146			1.12898	0.113677	0.128339	127679
33	0	3608	16146			1.14691	0.00184571	0.00211686	1766.85
34	0	3688	16146			1.05883	0.00207593	0.00219806	1766.85
35	0	3768	16146			0.997612	0.00143205	0.00142863	1766.85
36	0	3848	16146			0.912005	0.00138686	0.00126483	1766.85
37	0	3928	16146			1.25203	0.000992739	0.00124294	1766.85
38	0	4008	16146			1.15228	0.00138055	0.00159078	1766.85
39	0	4088	16146			1.01772	0.00263413	0.00268081	1766.85
40	0	4168	16146			0.990904	0.00367496	0.00364153	1766.85
41	0	4248	16146			1.06911	0.00347088	0.00371075	1766.85
42	0	4328	16146			1.31156	0.0020789	0.00272661	1766.85
43	0	4408	16146			0.894099	0.00263601	0.00235686	1766.85
44	0	4488	16146			1.02282	0.0898656	0.0919163	68912.5
45	0	4568	16146			1.13715	0.167489	0.190459	110926
46	0	4648	16146			1.0575	0.154615	0.163505	85878.5
47	0	4728	16146			1.00399	0.170445	0.171124	59664.5
48	0	4808	16146			1.03572	0.164933	0.170823	69611
49	0	4888	16146			0.982074	0.158209	0.155373	73287.9
50	0	4968	16146			1.2577	0.0905828	0.113926	90720.7
51	0	5048	16146			1.1236	0.160724	0.180589	78849.6
52	0	5128	16146			1.13529	0.167002	0.189596	96082.3
53	0	5208	16146			1.11271	0.00308919	0.00343737	1766.85
54	0	5288	16146			1.47428	0.00361112	0.00532378	1766.85
55	0	5368	16146			1.07148	0.00358351	0.00383968	1766.85
56	0	5448	16146			1.03161	0.00349373	0.00360418	1766.85
57	0	5528	16146			1.0313	0.00195848	0.00201978	1766.85
58	0	5608	16146			1.38277	0.114884	0.158858	99073.7
59	0	5688	16146			1.16694	0.108582	0.126708	85589.9
60	0	5768	16146			0.977896	0.106177	0.10383	78361.2
61	0	5848	16146			0.952011	0.0958839	0.0912825	59901.6
62	0	5928	16146			1.00029	0.16267	0.162717	98402.4
63	0	6008	16146			0.685703	0.00281592	0.00193088	1766.85
64	0	6088	16146			0.886832	0.00663989	0.00588847	1766.85
65	0	6168	16146			46.4261	0.016132	0.748947	1766.85
66	0	6248	16146			0.007122	1.29411	0.00921611	1766.85
67	0	6328	16146			0.578737	1.29411	0.748947	1766.85
68	0	6408	16146			0.578737	1.29411	0.748947	1766.85
69	0	2728	16066			0.600481	0.00333716	0.0020039	1766.85
70	0	2808	16066			1.07837	0.00232972	0.00251231	1766.85
71	0	2888	16066			1.26015	0.00147126	0.00185401	1766.85
72	0	2968	16066			1.05996	0.001493	0.00158251	1766.85
73	0	3048	16066			1.03368	0.00170229	0.00175962	1766.85
74	0	3128	16066			1.17864	0.0015181	0.00178929	1766.85
75	0	3208	16066			1.2085	0.0015761	0.00190472	1766.85
76	0	3288	16066			1.11309	0.00155039	0.00172571	1766.85
77	0	3368	16066			1.16487	0.00133615	0.00155644	1766.85
78	0	3448	16066			1.0782	0.0716383	0.0772402	99481.5
79	0	3528	16066			1.20257	0.0611668	0.0735574	97336.8
80	0	3608	16066			1.17808	0.0654301	0.0770817	101336
81	0	3688	16066			1.14467	0.00110425	0.001264	1766.85
82	0	3768	16066			1.1094	0.000986166	0.00109405	1766.85
83	0	3848	16066			1.09565	0.000923798	0.00101216	1766.85
84	0	3928	16066			1.33877	0.000806697	0.00107999	1766.85
85	0	4008	16066			1.42223	0.000879049	0.00125021	1766.85
86	0	4088	16066			1.294	0.00128631	0.00166449	1766.85
87	0	4168	16066			1.53121	0.0728069	0.111483	118717
88	0	4248	16066			1.16094	0.00150868	0.00175149	1766.85
89	0	4328	16066			1.45506	0.00125514	0.00182631	1766.85
90	0	4408	16066			1.16979	0.0973298	0.113856	125988
91	0	4488	16066			1.28709	0.00106643	0.00137259	1766.85
92	0	4568	16066			1.03493	0.11742	0.121521	136272
93	0	4648	16066			1.07811	0.142388	0.153509	127189
94	0	4728	16066			0.965962	0.00325016	0.00313953	1766.85
95	0	4808	16066			1.27939	0.115981	0.148384	57583.1
96	0	4888	16066			1.2371	0.131512	0.162694	60522
97	0	4968	16066			1.26469	0.00255457	0.00323072	1766.85
98	0	5048	16066			1.35965	0.00178323	0.00242456	1766.85
99	0	5128	16066			1.20486	0.00200359	0.00241404	1766.85
100	0	5208	16066			1.21975	0.00204919	0.00249951	1766.85
101	0	5288	16066			1.258	0.00206819	0.00260178	1766.85
102	0	5368	16066			1.30231	0.00165354	0.00215343	1766.85
103	0	5448	16066			1.25738	0.0015602	0.00196177	1766.85
104	0	5528	16066			1.13823	0.00145382	0.00165479	1766.85
105	0	5608	16066			1.17519	0.10444	0.122737	118848
106	0	5688	16066			1.3809	0.00146325	0.0020206	1766.85
107	0	5768	16066			1.02408	0.00179025	0.00183336	1766.85
108	0	5848	16066			0.849889	0.00266861	0.00226802	1766.85
109	0	5928	16066			1.29421	0.00156986	0.00203173	1766.85
110	0	6008	16066			0.991256	0.00264977	0.0026266	1766.85
111	0	6088	16066			1.18217	0.0745831	0.0881702	118980
112	0	6168	16066			1.28158	0.050413	0.0646081	73113.7
113	0	6248	16066			0.965616	0.0767909	0.0741505	38839.6
114	0	6328	16066			1.38026	0.114666	0.158268	66176.3
115	0	6408	16066			1.06774	0.154662	0.165138	34762.7
116	0	6488	16066			1.23364	0.0122768	0.0151452	1766.85
117	0	6568	16066			0.997018	0.0439154	0.0437845	1766.85
118	0	6648	16066			2.20912	0.0135895	0.0300207	1766.85
119	0	6728	16066			0.88135	0.0195128	0.0171977	1766.85
120	0	6808	16066			0.692663	0.0142931	0.00990028	1766.85
121	0	6888	16066			1.62102	0.017419	0.0282365	1766.85
122	0	6968	16066			1.05806	0.0271501	0.0287265	1766.85
123	0	2248	15986			1.23465	0.0853513	0.105379	37698.8
124	0	2328	15986			0.868402	0.00411067	0.00356972	1766.85
125	0	2408	15986			0.798281	0.0028675	0.00228907	1766.85
126	0	2488	15986			1.18151	0.00134882	0.00159364	1766.85
127	0	2568	15986			1.16807	0.000968952	0.0011318	1766.85
128	0	2648	15986			1.07535	0.00105846	0.00113821	1766.85
129	0	2728	15986			1.18896	0.00122708	0.00145895	1766.85
130	0	2808	15986			1.1712	0.00092323	0.00108128	1766.85
131	0	2888	15986			1.37829	0.000868967	0.00119769	1766.85
132	0	2968	15986			1.19285	0.00112793	0.00134545	1766.85
133	0	3048	15986			1.16532	0.00135866	0.00158326	1766.85
134	0	3128	15986			1.47639	0.00119688	0.00176706	1766.85
135	0	3208	15986			1.22711	0.0810722	0.0994849	114206
136	0	3288	15986			1.53281	0.00111283	0.00170575	1766.85
137	0	3368	15986			1.54527	0.00083589	0.00129168	1766.85
138	0	3448	15986			1.38311	0.0616029	0.0852033	135811
139	0	3528	15986			1.16507	0.000909016	0.00105907	1766.85
140	0	3608	15986			1.00756	0.0813558	0.0819709	134003
141	0	3688	15986			1.32524	0.0468916	0.0621427	101889
142	0	3768	15986			1.43157	0.0723057	0.103511	212125
143	0	3848	15986			1.28533	0.0484279	0.0622461	125998
144	0	3928	15986			1.53928	0.0611021	0.0940534	163212
145	0	4008	15986			1.41818	0.0508632	0.0721332	145955
146	0	4088	15986			1.47257	0.0502314	0.0739694	133732
147	0	4168	15986			1.37411	0.0444822	0.0611235	97824.5
148	0	4248	15986			1.44854	0.000749629	0.00108587	1766.85
149	0	4328	15986			1.4118	0.000707403	0.00099871	1766.85
150	0	4408	15986			1.3368	0.094313	0.126077	198661
151	0	4488	15986			1.59958	0.0718231	0.114887	138549
152	0	4568	15986			1.11728	0.0901733	0.100749	112629
153	0	4648	15986			1.49667	0.00112834	0.00168876	1766.85
154	0	4728	15986			1.4847	0.00135993	0.00201909	1766.85
155	0	4808	15986			1.41368	0.00180441	0.00255085	1766.85
156	0	4888	15986			1.58506	0.0893125	0.141565	113378
157	0	4968	15986			1.30425	0.0876351	0.114298	120993
158	0	5048	15986			1.42676	0.0809952	0.115561	113820
159	0	5128	15986			1.38509	0.0931154	0.128973	132104
160	0	5208	15986			1.28618	0.0013399	0.00172336	1766.85
161	0	5288	15986			1.28323	0.00139897	0.0017952	1766.85
162	0	5368	15986			1.18276	0.00154067	0.00182224	1766.85
163	0	5448	15986			1.13579	0.00113597	0.00129023	1766.85
164	0	5528	15986			1.49732	0.00112833	0.00168946	1766.85
165	0	5608	15986			1.14995	0.00131426	0.00151134	1766.85
166	0	5688	15986			1.3678	0.00131854	0.0018035	1766.85
167	0	5768	15986			1.04658	0.00157039	0.00164354	1766.85
168	0	5848	15986			1.16549	0.00162111	0.0018894	1766.85
169	0	5928	15986			0.967189	0.00210665	0.00203753	1766.85
170	0	6008	15986			1.27504	0.00227832	0.00290495	1766.85
171	0	6088	15986			0.907006	0.139382	0.12642	102198
172	0	6168	15986			1.06143	0.0865934	0.0919126	79397.6
173	0	6248	15986			0.990112	0.139445	0.138066	94946.9
174	0	6328	15986			1.05525	0.00232984	0.00245857	1766.85
175	0	6408	15986			1.18765	0.00606233	0.00719992	1766.85
176	0	6488	15986			1.04328	0.0146047	0.0152368	1766.85
177	0	6568	15986			0.925204	0.0198576	0.0183723	1766.85
178	0	6648	15986			0.700195	0.0177736	0.012445	1766.85
179	0	6728	15986			0.686388	0.0148714	0.0102076	1766.85
180	0	6808	15986			0.878565	0.0114138	0.0100277	1766.85
181	0	6888	15986			1.00577	0.0194126	0.0195246	1766.85
182	0	6968	15986			0.881542	0.0205089	0.0180794	1766.85
183	0	7048	15986			0.902581	0.00816276	0.00736755	1766.85
184	0	7128	15986			0.87994	0.01109	0.00975854	1766.85
185	0	7208	15986			0.578737	1.29411	0.748947	1766.85
186	0	1848	15906			0.857313	0.00627335	0.00537823	1766.85
187	0	1928	15906			1.00745	0.124666	0.125594	107231
188	0	2008	15906			1.22417	0.0582859	0.0713521	91360.4
189	0	2088	15906			1.14559	0.00153333	0.00175656	1766.85
190	0	2168	15906			1.17114	0.0769647	0.0901368	69280.9
191	0	2248	15906			0.996102	0.0877232	0.0873813	67607.9
192	0	2328	15906			1.48851	0.00187198	0.00278647	1766.85
193	0	2408	15906			1.02008	0.120469	0.122887	108022
194	0	2488	15906			1.1184	0.0752162	0.0841215	133541
195	0	2568	15906			1.16961	0.000810283	0.000947718	1766.85
196	0	2648	15906			0.880214	0.00117746	0.00103642	1766.85
197	0	2728	15906			1.38168	0.00187492	0.00259054	1766.85
198	0	2808	15906			1.09313	0.0530997	0.0580447	114782
199	0	2888	15906			1.25492	0.0582702	0.0731247	126376
200	0	2968	15906			1.12254	0.000819358	0.000919758	1766.85
201	0	3048	15906			1.3513	0.085791	0.11593	181702
202	0	3128	15906			1.35394	0.000760256	0.00102934	1766.85
203	0	3208	15906			1.35616	0.0601076	0.0815155	150633
204	0	3288	15906			1.26093	0.0869916	0.10969	185192
205	0	3368	15906			1.36886	0.000697476	0.000954748	1766.85
206	0	3448	15906			1.39348	0.000648375	0.000903497	1766.85
207	0	3528	15906			1.06524	0.0704499	0.0750459	156771
208	0	3608	15906			1.18075	0.000695265	0.000820938	1766.85
209	0	3688	15906			1.34785	0.0553756	0.0746382	176614
210	0	3768	15906			1.2128	0.000699561	0.00084843	1766.85
211	0	3848	15906			1.26058	0.0472963	0.0596209	119436
212	0	3928	15906			1.3797	0.000552791	0.000762683	1766.85
213	0	4008	15906			1.25463	0.0670262	0.0840931	181934
214	0	4088	15906			1.20429	0.0650376	0.0783241	179860
215	0	4168	15906			1.10094	0.0580502	0.06391	136724
216	0	4248	15906			1.40218	0.0918892	0.128845	216735
217	0	4328	15906			1.20918	0.0953802	0.115332	199784
218	0	4408	15906			1.27794	0.0560956	0.0716869	148821
219	0	4488	15906			1.23824	0.061871	0.0766109	144917
220	0	4568	15906			1.44135	0.0513016	0.0739434	110315
221	0	4648	15906			1.25661	0.0829329	0.104215	160292
222	0	4728	15906			1.70601	0.0533927	0.0910883	107676
223	0	4808	15906			1.38352	0.0921039	0.127427	136955
224	0	4888	15906			1.30697	0.000950514	0.00124229	1766.85
225	0	4968	15906			1.12631	0.000925934	0.00104289	1766.85
226	0	5048	15906			1.4705	0.000757978	0.0011146	1766.85
227	0	5128	15906			1.41482	0.00103114	0.00145888	1766.85
228	0	5208	15906			1.79742	0.000874235	0.00157137	1766.85
229	0	5288	15906			1.31167	0.00088687	0.00116328	1766.85
230	0	5368	15906			1.73181	0.000677229	0.00117283	1766.85
231	0	5448	15906			2.02122	0.000733408	0.00148238	1766.85
232	0	5528	15906			1.30195	0.000878709	0.00114404	1766.85
233	0	5608	15906			1.31116	0.000852932	0.00111833	1766.85
234	0	5688	15906			1.23466	0.00118756	0.00146623	1766.85
235	0	5768	15906			1.49991	0.000972808	0.00145912	1766.85
236	0	5848	15906			1.74306	0.00112645	0.00196347	1766.85
237	0	5928	15906			1.12968	0.00163656	0.0018488	1766.85
238	0	6008	15906			1.17769	0.00158781	0.00186994	1766.85
239	0	6088	15906			0.960317	0.00181663	0.00174454	1766.85
240	0	6168	15906			1.19172	0.102597	0.122267	115498
241	0	6248	15906			0.971437	0.0021393	0.0020782	1766.85
242	0	6328	15906			1.2534	0.00248371	0.00311308	1766.85
243	0	6408	15906			0.751138	0.00477858	0.00358937	1766.85
244	0	6488	15906			1.23467	0.00512727	0.00633047	1766.85
245	0	6568	15906			1.03647	0.0113185	0.0117313	1766.85
246	0	6648	15906			1.37796	0.00560942	0.00772956	1766.85
247	0	6728	15906			0.982008	0.254584	0.250004	67632.6
248	0	6808	15906			0.888532	0.00665151	0.00591008	1766.85
249	0	6888	15906			0.912358	0.00742819	0.00677717	1766.85
250	0	6968	15906			1.20908	0.00886983	0.0107243	1766.85
251	0	7048	15906			1.28928	0.00848979	0.0109457	1766.85
252	0	7128	15906			0.901403	0.161593	0.14566	30279.8
253	0	7208	15906			1.05915	0.0197926	0.0209634	1766.85
254	0	7288	15906			0.961705	0.0275898	0.0265333	1766.85
255	0	7368	15906			68.5944	0.0109185	0.748947	1766.85
256	0	1688	15826			0.838859	0.113477	0.0951914	39178.1
257	0	1768	15826			1.23953	0.0782944	0.0970484	84148.6
258	0	1848	15826			0.972383	0.112033	0.108939	91590.3
259	0	1928	15826			0.862608	0.205799	0.177524	60998.5
260	0	2008	15826			1.18255	0.0710535	0.0840245	86922.1
261	0	2088	15826			1.50452	0.0630134	0.094805	90951
262	0	2168	15826			1.01248	0.00144117	0.00145916	1766.85
263	0	2248	15826			1.38976	0.0012136	0.00168661	1766.85
264	0	2328	15826			1.08968	0.00151254	0.00164818	1766.85
265	0	2408	15826			1.5597	0.0011349	0.00177012	1766.85
266	0	2488	15826			1.13233	0.0606464	0.0686717	116316
267	0	2568	15826			1.08625	0.0583507	0.0633833	133784
268	0	2648	15826			1.11088	0.00106308	0.00118095	1766.85
269	0	2728	15826			0.98074	0.0876179	0.0859304	120322
270	0	2808	15826			1.29875	0.0432643	0.0561895	125187
271	0	2888	15826			1.34593	0.0321475	0.0432685	100688
272	0	2968	15826			1.45739	0.0376614	0.0548874	102553
273	0	3048	15826			1.29665	0.00080891	0.00104887	1766.85
274	0	3128	15826			1.29199	0.0481912	0.0622626	112652
275	0	3208	15826			1.49198	0.0585471	0.0873511	176839
276	0	3288	15826			1.56109	0.00056609	0.000883716	1766.85
277	0	3368	15826			1.34481	0.0482024	0.0648229	158042
278	0	3448	15826			1.39272	0.000574406	0.00079999	1766.85
279	0	3528	15826			1.11148	0.0320564	0.0356299	93278
280	0	3608	15826			1.33662	0.0475984	0.063621	169118
281	0	3688	15826			1.40439	0.0418728	0.0588058	149209
282	0	3768	15826			1.4385	0.000563103	0.000810026	1766.85
283	0	3848	15826			1.13896	0.000620285	0.00070648	1766.85
284	0	3928	15826			1.50864	0.000620994	0.000936857	1766.85
285	0	4008	15826			1.61701	0.000671687	0.00108613	1766.85
286	0	4088	15826			1.40927	0.00061078	0.000860752	1766.85
287	0	4168	15826			1.18662	0.0612388	0.072667	178245
288	0	4248	15826			1.25546	0.0635872	0.0798314	173187
289	0	4328	15826			1.31848	0.0357119	0.0470854	118183
290	0	4408	15826			1.4933	0.0795495	0.118791	229579
291	0	4488	15826			1.5882	0.0448301	0.0711993	144268
292	0	4568	15826			1.37793	0.0478977	0.0659998	138887
293	0	4648	15826			1.47194	0.000663805	0.000977083	1766.85
294	0	4728	15826			1.36519	0.074229	0.101337	184072
295	0	4808	15826			1.33477	0.095667	0.127694	200206
296	0	4888	15826			1.61635	0.000836866	0.00135267	1766.85
297	0	4968	15826			1.40379	0.0599771	0.0841951	139812
298	0	5048	15826			1.53035	0.0560166	0.0857251	142948
299	0	5128	15826			1.58088	0.105183	0.166282	233545
300	0	5208	15826			1.32508	0.0858843	0.113803	179749
301	0	5288	15826			1.75135	0.0666082	0.116654	165913
302	0	5368	15826			1.40367	0.0594426	0.083438	151815
303	0	5448	15826			1.59664	0.00080541	0.00128595	1766.85
304	0	5528	15826			1.43264	0.0010276	0.00147218	1766.85
305	0	5608	15826			1.55161	0.000691694	0.00107324	1766.85
306	0	5688	15826			1.83203	0.000782922	0.00143433	1766.85
307	0	5768	15826			1.29848	0.000944939	0.00122699	1766.85
308	0	5848	15826			1.45077	0.0856887	0.124315	145074
309	0	5928	15826			1.26051	0.000991214	0.00124944	1766.85
310	0	6008	15826			1.72316	0.00113191	0.00195046	1766.85
311	0	6088	15826			1.28292	0.00133121	0.00170783	1766.85
312	0	6168	15826			1.16212	0.00122202	0.00142014	1766.85
313	0	6248	15826			1.14902	0.0839844	0.0965	114497
314	0	6328	15826			1.20268	0.0026105	0.00313959	1766.85
315	0	6408	15826			1.0152	0.0043061	0.00437156	1766.85
316	0	6488	15826			1.12363	0.00537664	0.00604137	1766.85
317	0	6568	15826			1.13549	0.275256	0.312551	91640.9
318	0	6648	15826			0.957184	0.00412572	0.00394907	1766.85
319	0	6728	15826			1.08637	0.00391892	0.00425738	1766.85
320	0	6808	15826			1.11482	0.00373877	0.00416806	1766.85
321	0	6888	15826			1.35311	0.00355909	0.00481583	1766.85
322	0	6968	15826			1.11388	0.00491998	0.00548028	1766.85
323	0	7048	15826			0.87823	0.200438	0.176031	75239.1
324	0	7128	15826			0.682811	0.00839634	0.00573312	1766.85
325	0	7208	15826			1.0889	0.0110652	0.0120489	1766.85
326	0	7288	15826			1.02541	0.0306968	0.0314767	1766.85
327	0	7368	15826			0.748453	0.0215633	0.0161391	1766.85
328	0	7448	15826			0.87921	0.239258	0.210358	66584.7
329	0	1608	15746			0.993404	0.0864676	0.0858973	85395.5
330	0	1688	15746			0.955944	0.106473	0.101782	71295
331	0	1768	15746			1.41635	0.0020968	0.00296981	1766.85
332	0	1848	15746			1.11839	0.115348	0.129004	113622
333	0	1928	15746			0.9045	0.0015007	0.00135738	1766.85
334	0	2008	15746			1.09569	0.000989444	0.00108413	1766.85
335	0	2088	15746			1.29088	0.0493086	0.0636514	96109.3
336	0	2168	15746			1.48788	0.000979179	0.0014569	1766.85
337	0	2248	15746			1.30893	0.0941178	0.123194	162638
338	0	2328	15746			1.33585	0.000933505	0.00124702	1766.85
339	0	2408	15746			1.45472	0.066515	0.0967608	136785
340	0	2488	15746			1.1476	0.0865174	0.0992875	203265
341	0	2568	15746			1.13551	0.0816592	0.0927248	204119
342	0	2648	15746			1.00613	0.0701248	0.0705549	87210.7
343	0	2728	15746			0.88093	0.100074	0.0881586	109369
344	0	2808	15746			1.17822	0.0654311	0.0770921	163169
345	0	2888	15746			1.22217	0.0005851	0.000715091	1766.85
346	0	2968	15746			1.47894	0.0483046	0.0714394	133633
347	0	3048	15746			1.30129	0.040527	0.0527374	102960
348	0	3128	15746			1.27097	0.0485047	0.0616481	146096
349	0	3208	15746			1.28716	0.0264499	0.0340451	103869
350	0	3288	15746			1.2736	0.0505009	0.0643179	179220
351	0	3368	15746			1.42431	0.0284588	0.0405342	101138
352	0	3448	15746			1.26269	0.0332419	0.0419743	111372
353	0	3528	15746			1.2491	0.0467154	0.0583522	178113
354	0	3608	15746			1.25498	0.0880864	0.110547	344450
355	0	3688	15746			1.40772	0.0569112	0.0801151	212871
356	0	3768	15746			1.41971	0.0426241	0.0605137	160149
357	0	3848	15746			1.2561	0.0304746	0.0382792	105986
358	0	3928	15746			1.33989	0.000521356	0.000698561	1766.85
359	0	4008	15746			1.67647	0.000497909	0.000834729	1766.85
360	0	4088	15746			1.39783	0.000590339	0.000825194	1766.85
361	0	4168	15746			1.34086	0.000553924	0.000742733	1766.85
362	0	4248	15746			1.13955	0.0615197	0.0701051	189824
363	0	4328	15746			1.47336	0.000625882	0.000922152	1766.85
364	0	4408	15746			1.29511	0.104684	0.135577	290023
365	0	4488	15746			1.43655	0.0472953	0.0679421	145522
366	0	4568	15746			1.46386	0.0500231	0.0732269	161279
367	0	4648	15746			1.31099	0.0655549	0.0859418	179217
368	0	4728	15746			1.71565	0.0792056	0.135889	208970
369	0	4808	15746			1.28132	0.000732547	0.00093863	1766.85
370	0	4888	15746			1.68104	0.0401849	0.0675525	105917
371	0	4968	15746			1.46776	0.000648012	0.000951123	1766.85
372	0	5048	15746			1.79322	0.0660785	0.118493	192822
373	0	5128	15746			1.58026	0.000699175	0.00110488	1766.85
374	0	5208	15746			1.64284	0.0743817	0.122197	191796
375	0	5288	15746			1.44477	0.0636921	0.0920202	173844
376	0	5368	15746			1.64156	0.0404434	0.0663902	125445
377	0	5448	15746			1.40332	0.0484924	0.0680505	128610
378	0	5528	15746			1.34948	0.000682546	0.00092108	1766.85
379	0	5608	15746			1.16008	0.0624137	0.0724047	152583
380	0	5688	15746			1.60763	0.000579657	0.000931872	1766.85
381	0	5768	15746			1.42039	0.000632892	0.000898952	1766.85
382	0	5848	15746			1.49876	0.0680732	0.102025	144723
383	0	5928	15746			1.40946	0.000914693	0.00128922	1766.85
384	0	6008	15746			1.20254	0.00107888	0.0012974	1766.85
385	0	6088	15746			1.35869	0.0767073	0.104221	161863
386	0	6168	15746			1.21911	0.000845723	0.00103103	1766.85
387	0	6248	15746			0.91218	0.00161294	0.00147129	1766.85
388	0	6328	15746			0.894641	0.00252524	0.00225919	1766.85
389	0	6408	15746			1.20471	0.00236683	0.00285134	1766.85
390	0	6488	15746			1.13844	0.00241813	0.0027529	1766.85
391	0	6568	15746			1.47523	0.00226544	0.00334205	1766.85
392	0	6648	15746			0.938867	0.00233693	0.00219406	1766.85
393	0	6728	15746			1.01378	0.00332249	0.0033683	1766.85
394	0	6808	15746			1.35079	0.00221846	0.00299668	1766.85
395	0	6888	15746			1.44275	0.00192498	0.00277726	1766.85
396	0	6968	15746			1.28873	0.00218658	0.00281792	1766.85
397	0	7048	15746			1.225	0.0996601	0.122084	73884.4
398	0	7128	15746			1.28951	0.00270858	0.00349273	88651.1
399	0	7208	15746			0.929152	0.00315137	0.0029281	1766.85
400	0	7288	15746			1.38678	0.00702285	0.00973918	1766.85
401	0	7368	15746			1.4229	0.00636912	0.00906262	1766.85
402	0	7448	15746			1.21637	0.00557037	0.00677562	1766.85
403	0	7528	15746			0.898088	0.0956838	0.0859325	44102.1
404	0	7608	15746			1.04509	0.143936	0.150425	102132
405	0	1528	15666			0.858713	0.142051	0.121981	68688.3
406	0	1608	15666			1.1706	0.00274054	0.00320809	1766.85
407	0	1688	15666			1.39802	0.00184885	0.00258473	1766.85
408	0	1768	15666			1.34415	0.00163049	0.00219163	1766.85
409	0	1848	15666			1.20335	0.0749738	0.0902201	99979.6
410	0	1928	15666			1.29982	0.00098769	0.00128382	1766.85
411	0	2008	15666			1.41745	0.000736772	0.00104433	1766.85
412	0	2088	15666			1.25709	0.000694391	0.000872908	1766.85
413	0	2168	15666			1.34428	0.0629836	0.0846678	116731
414	0	2248	15666			1.31936	0.000926264	0.00122208	1766.85
415	0	2328	15666			1.15899	0.0998227	0.115693	200225
416	0	2408	15666			1.24932	0.0456635	0.0570483	129259
417	0	2488	15666			1.31497	0.0740838	0.0974179	204758
418	0	2568	15666			1.11939	0.0680563	0.0761812	130087
419	0	2648	15666			0.78805	0.0970677	0.0764942	56617.5
420	0	2728	15666			0.68687	0.00364344	0.00250257	1766.85
421	0	2808	15666			0.971828	0.0477127	0.0463686	85337.8
422	0	2888	15666			1.13243	0.0463323	0.052468	129460
423	0	2968	15666			1.18821	0.0563484	0.0669535	182900
424	0	3048	15666			1.21788	0.000516074	0.000628517	1766.85
425	0	3128	15666			1.42274	0.0492401	0.0700558	165424
426	0	3208	15666			1.39364	0.0457928	0.0638186	163678
427	0	3288	15666			1.37137	0.0320026	0.0438875	116637
428	0	3368	15666			1.29705	0.0608572	0.0789349	211470
429	0	3448	15666			1.29112	0.0487155	0.0628977	180853
430	0	3528	15666			1.28678	0.0668518	0.0860236	250439
431	0	3608	15666			1.30387	0.0535132	0.069774	225585
432	0	3688	15666			1.44455	0.0453921	0.0655712	161624
433	0	3768	15666			1.12312	0.0368801	0.0414209	122170
434	0	3848	15666			1.26795	0.0486991	0.0617482	200255
435	0	3928	15666			1.2688	0.0748594	0.0949816	225308
436	0	4008	15666			1.19093	0.0417313	0.0496992	131185
437	0	4088	15666			1.36535	0.0533556	0.0728492	144340
438	0	4168	15666			1.31963	0.0656462	0.0866284	188854
439	0	4248	15666			1.35087	0.00051241	0.000692199	1766.85
440	0	4328	15666			1.34323	0.0396473	0.0532553	138830
441	0	4408	15666			1.55233	0.00054962	0.000853191	1766.85
442	0	4488	15666			1.40981	0.000556447	0.000784486	1766.85
443	0	4568	15666			1.33882	0.0515472	0.0690125	163980
444	0	4648	15666			1.32238	0.0659868	0.0872598	190315
445	0	4728	15666			1.85665	0.0483772	0.0898197	126228
446	0	4808	15666			1.36792	0.000681472	0.000932198	1766.85
447	0	4888	15666			1.66668	0.000525593	0.000875996	1766.85
448	0	4968	15666			1.51212	0.049581	0.0749727	170616
449	0	5048	15666			1.30842	0.0431367	0.0564408	129876
450	0	5128	15666			1.34046	0.0508178	0.0681191	138617
451	0	5208	15666			1.30608	0.000574533	0.000750386	1766.85
452	0	5288	15666			1.49117	0.0439133	0.0654821	128614
453	0	5368	15666			1.27043	0.0547626	0.0695721	138874
454	0	5448	15666			1.71167	0.000554702	0.000949469	1766.85
455	0	5528	15666			1.47715	0.0653316	0.0965046	164552
456	0	5608	15666			1.35164	0.0497617	0.0672599	143189
457	0	5688	15666			1.36039	0.0526025	0.0715597	146449
458	0	5768	15666			1.45115	0.0585763	0.0850031	153395
459	0	5848	15666			1.35093	0.0768115	0.103767	164556
460	0	5928	15666			1.49099	0.134085	0.199919	290811
461	0	6008	15666			1.32415	0.000834853	0.00110547	1766.85
462	0	6088	15666			1.15861	0.000945082	0.00109498	1766.85
463	0	6168	15666			1.38759	0.0699481	0.0970595	139115
464	0	6248	15666			0.919551	0.00197783	0.00181872	1766.85
465	0	6328	15666			0.722018	0.0223964	0.0161706	1766.85
466	0	6408	15666			1.11506	0.135627	0.151233	111819
467	0	6488	15666			1.01692	0.00192482	0.00195739	1766.85
468	0	6568	15666			1.13898	0.0863333	0.0983321	96607.9
469	0	6648	15666			1.21079	0.0938312	0.11361	131399
470	0	6728	15666			1.14172	0.00161508	0.00184397	1766.85
471	0	6808	15666			1.11083	0.142407	0.15819	139124
472	0	6888	15666			1.31594	0.00160947	0.00211796	1766.85
473	0	6968	15666			1.46983	0.00179292	0.00263528	1766.85
474	0	7048	15666			1.18543	0.00219138	0.00259772	1766.85
475	0	7128	15666			1.24134	0.00219888	0.00272956	1766.85
476	0	7208	15666			0.982249	0.176788	0.17365	113347
477	0	7288	15666			1.19194	0.00261695	0.00311924	1766.85
478	0	7368	15666			1.95122	0.00220935	0.00431091	1766.85
479	0	7448	15666			1.32599	0.00278324	0.00369055	1766.85
480	0	7528	15666			1.52242	0.0885468	0.134806	89098.4
481	0	7608	15666			1.25569	0.00162483	0.00204027	1766.85
482	0	7688	15666			1.38474	0.0812329	0.112486	94028.6
483	0	7768	15666			1.49442	0.0957295	0.14306	99075.9
484	0	1528	15586			0.947157	0.00216788	0.00205332	1766.85
485	0	1608	15586			1.02835	0.00204809	0.00210615	1766.85
486	0	1688	15586			1.29699	0.00170451	0.00221074	1766.85
487	0	1768	15586			1.45832	0.00125492	0.00183008	1766.85
488	0	1848	15586			1.57478	0.000702918	0.00110694	1766.85
489	0	1928	15586			1.58926	0.000697007	0.00110773	1766.85
490	0	2008	15586			1.5017	0.000795959	0.00119529	1766.85
491	0	2088	15586			1.24139	0.000854273	0.00106048	1766.85
492	0	2168	15586			1.67353	0.0532318	0.0890851	130144
493	0	2248	15586			1.23429	0.0761023	0.0939327	166331
494	0	2328	15586			1.31017	0.0795321	0.1042	240657
495	0	2408	15586			1.03393	0.0853242	0.0882191	259252
496	0	2488	15586			1.03295	0.0725441	0.0749342	224040
497	0	2568	15586			1.18205	0.0533216	0.0630287	128035
498	0	2648	15586			1.00219	0.0481727	0.0482783	85944.6
499	0	2728	15586			0.982334	0.0857126	0.0841984	162777
500	0	2808	15586			1.2085	0.046176	0.0558037	114386
501	0	2888	15586			1.16093	0.000640251	0.000743288	1766.85
502	0	2968	15586			1.13042	0.061214	0.0691973	186463
503	0	3048	15586			1.37924	0.0507675	0.0700206	186835
504	0	3128	15586			1.28279	0.0431867	0.0553994	145291
505	0	3208	15586			1.42585	0.0702553	0.100174	269074
506	0	3288	15586			1.29615	0.0702237	0.0910205	240467
507	0	3368	15586			1.05386	0.0471748	0.0497157	167129
508	0	3448	15586			1.22171	0.0518137	0.0633013	191508
509	0	3528	15586			0.968845	0.0563873	0.0546306	213673
510	0	3608	15586			1.47746	0.0581188	0.0858682	218911
511	0	3688	15586			1.25071	0.0380468	0.0475856	134811
512	0	3768	15586			1.39812	0.042751	0.0597709	141383
513	0	3848	15586			1.25309	0.000663036	0.000830841	1766.85
514	0	3928	15586			1.3211	0.000683697	0.000903234	1766.85
515	0	4008	15586			1.34442	0.000666011	0.000895397	1766.85
516	0	4088	15586			1.42976	0.0668179	0.0955338	164084
517	0	4168	15586			1.32756	0.000499938	0.000663695	1766.85
518	0	4248	15586			1.2396	0.0634156	0.0786098	158298
519	0	4328	15586			1.37182	0.000634176	0.000869976	1766.85
520	0	4408	15586			1.45131	0.0557369	0.0808914	157706
521	0	4488	15586			1.65792	0.0731073	0.121206	227518
522	0	4568	15586			1.37152	0.064635	0.0886479	218968
523	0	4648	15586			1.39337	0.0746634	0.104034	247100
524	0	4728	15586			1.48679	0.0540258	0.080325	144079
525	0	4808	15586			1.33853	0.0441642	0.0591151	143994
526	0	4888	15586			1.59433	0.0709662	0.113143	238883
527	0	4968	15586			1.54512	0.0438285	0.06772	140358
528	0	5048	15586			1.71169	0.000543208	0.000929804	1766.85
529	0	5128	15586			1.66805	0.000640831	0.00106894	1766.85
530	0	5208	15586			1.54432	0.0547584	0.0845642	170196
531	0	5288	15586			1.41507	0.000681971	0.00096504	1766.85
532	0	5368	15586			1.33502	0.000678239	0.000905461	1766.85
533	0	5448	15586			1.2417	0.072116	0.0895461	175928
534	0	5528	15586			1.31129	0.06168	0.0808805	160463
535	0	5608	15586			1.33167	0.0487334	0.0648971	123700
536	0	5688	15586			1.37228	0.08556	0.117412	248853
537	0	5768	15586			1.14283	0.000850952	0.000972495	1766.85
538	0	5848	15586			1.20614	0.0591942	0.0713967	132769
539	0	5928	15586			1.537	0.0761712	0.117075	183956
540	0	6008	15586			1.10765	0.085925	0.0951746	210536
541	0	6088	15586			1.31485	0.0599901	0.078878	158953
542	0	6168	15586			1.24248	0.0652931	0.0811251	125261
543	0	6248	15586			1.20618	0.00180579	0.0021781	1766.85
544	0	6328	15586			1.24862	0.00216907	0.00270834	1766.85
545	0	6408	15586			1.07316	0.00187981	0.00201733	1766.85
546	0	6488	15586			1.47653	0.063464	0.0937062	114307
547	0	6568	15586			1.52868	0.00105644	0.00161496	1766.85
548	0	6648	15586			1.37831	0.00113457	0.0015638	1766.85
549	0	6728	15586			1.1895	0.0881027	0.104798	124906
550	0	6808	15586			1.12585	0.00139693	0.00157273	1766.85
551	0	6888	15586			1.20481	0.0721918	0.0869772	100653
552	0	6968	15586			1.00796	0.00175541	0.00176939	1766.85
553	0	7048	15586			1.36342	0.00161089	0.00219631	1766.85
554	0	7128	15586			1.15152	0.00167311	0.00192661	1766.85
555	0	7208	15586			0.998757	0.00188129	0.00187896	1766.85
556	0	7288	15586			1.572	0.00129375	0.00203378	1766.85
557	0	7368	15586			1.29992	0.00138255	0.00179721	1766.85
558	0	7448	15586			1.3268	0.00122333	0.00162311	1766.85
559	0	7528	15586			1.54997	0.0011798	0.00182866	1766.85
560	0	7608	15586			1.27965	0.0733369	0.0938453	109984
561	0	7688	15586			1.36753	0.00134713	0.00184225	1766.85
562	0	7768	15586			1.40931	0.090148	0.127046	108125
563	0	7848	15586			1.20713	0.068982	0.0832702	73225.8
564	0	1448	15506			1.34681	0.00204587	0.00275539	1766.85
565	0	1528	15506			1.26277	0.00175055	0.00221054	1766.85
566	0	1608	15506			1.54947	0.00108399	0.00167962	1766.85
567	0	1688	15506			1.27374	0.00128957	0.00164258	1766.85
568	0	1768	15506			1.3312	0.0012565	0.00167266	1766.85
569	0	1848	15506			1.96482	0.000649783	0.00127671	1766.85
570	0	1928	15506			1.36938	0.049156	0.0673132	139463
571	0	2008	15506			1.6433	0.000676077	0.001111	1766.85
572	0	2088	15506			1.42927	0.000670791	0.00095874	1766.85
573	0	2168	15506			1.32103	0.00073523	0.00097126	1766.85
574	0	2248	15506			1.35679	0.000648648	0.00088008	1766.85
575	0	2328	15506			1.21243	0.107228	0.130006	387187
576	0	2408	15506			1.18044	0.0816295	0.0963588	301392
577	0	2488	15506			1.04436	0.100773	0.105243	363686
578	0	2568	15506			0.891759	0.0630179	0.0561967	168734
579	0	2648	15506			1.27587	0.0546991	0.0697892	164096
580	0	2728	15506			1.17878	0.0552961	0.0651821	163409
581	0	2808	15506			1.11032	0.0544584	0.0604663	133496
582	0	2888	15506			1.43778	0.0497013	0.0714596	146733
583	0	2968	15506			1.17616	0.0721552	0.0848657	234395
584	0	3048	15506			1.28781	0.0660006	0.0849961	206728
585	0	3128	15506			1.27955	0.0634979	0.081249	189348
586	0	3208	15506			1.1205	0.0765877	0.0858167	214046
587	0	3288	15506			1.20205	0.078945	0.0948956	262304
588	0	3368	15506			1.15956	0.0458868	0.0532087	164114
589	0	3448	15506			1.34442	0.0534898	0.0719129	169734
590	0	3528	15506			1.11993	0.0568616	0.063681	200345
591	0	3608	15506			1.08869	0.0894246	0.0973558	240846
592	0	3688	15506			1.18469	0.0619934	0.0734432	156960
593	0	3768	15506			1.06886	0.0538025	0.0575074	169683
594	0	3848	15506			1.09061	0.136059	0.148388	685107
595	0	3928	15506			0.842828	0.202615	0.17077	790254
596	0	4008	15506			1.22595	0.000757497	0.000928654	1766.85
597	0	4088	15506			1.50501	0.0779355	0.117294	204970
598	0	4168	15506			1.29213	0.0640029	0.0827	170705
599	0	4248	15506			1.40592	0.0629997	0.0885727	167416
600	0	4328	15506			1.3541	0.0915976	0.124033	274056
601	0	4408	15506			1.49509	0.0685436	0.102479	237833
602	0	4488	15506			1.38386	0.0650365	0.0900016	201273
603	0	4568	15506			1.35176	0.0869656	0.117557	304855
604	0	4648	15506			1.34471	0.0475714	0.0639698	174686
605	0	4728	15506			1.62332	0.0806521	0.130925	292386
606	0	4808	15506			1.29738	0.0615927	0.0799092	201404
607	0	4888	15506			1.89279	0.0569168	0.107731	183985
608	0	4968	15506			1.43375	0.0479946	0.0688122	160338
609	0	5048	15506			1.57402	0.06571	0.103429	196017
610	0	5128	15506			1.56455	0.0637414	0.0997269	203535
611	0	5208	15506			1.75456	0.0638981	0.112113	222862
612	0	5288	15506			1.57267	0.000592993	0.000932584	1766.85
613	0	5368	15506			1.45586	0.0627225	0.0913152	141129
614	0	5448	15506			1.4641	0.0681265	0.0997442	154301
615	0	5528	15506			1.3825	0.0603844	0.0834812	141475
616	0	5608	15506			1.36211	0.0673576	0.0917485	164524
617	0	5688	15506			1.49898	0.0744472	0.111595	167491
618	0	5768	15506			1.30137	0.000857406	0.00111581	1766.85
619	0	5848	15506			1.26303	0.000785911	0.00099263	1766.85
620	0	5928	15506			1.40657	0.0938121	0.131953	183186
621	0	6008	15506			1.20813	0.000887794	0.00107257	1766.85
622	0	6088	15506			1.17856	0.0479755	0.0565418	123306
623	0	6168	15506			1.52327	0.00119724	0.00182372	1766.85
624	0	6248	15506			1.0044	0.00187449	0.00188274	1766.85
625	0	6328	15506			1.16618	0.00121505	0.00141697	1766.85
626	0	6408	15506			1.11799	0.0811283	0.0907003	113123
627	0	6488	15506			1.39829	0.00092744	0.00129683	1766.85
628	0	6568	15506			1.34944	0.0863711	0.116553	200170
629	0	6648	15506			1.0626	0.0864945	0.0919094	148581
630	0	6728	15506			1.34066	0.00124079	0.00166348	1766.85
631	0	6808	15506			1.27585	0.0982601	0.125366	136795
632	0	6888	15506			1.30817	0.0796822	0.104238	150707
633	0	6968	15506			1.43084	0.000835841	0.00119595	1766.85
634	0	7048	15506			1.22498	0.000992782	0.00121614	1766.85
635	0	7128	15506			1.33105	0.00101165	0.00134657	1766.85
636	0	7208	15506			1.16963	0.0684929	0.0801116	125146
637	0	7288	15506			1.41156	0.000840968	0.00118708	1766.85
638	0	7368	15506			1.61861	0.0566246	0.0916533	133298
639	0	7448	15506			1.83472	0.000759432	0.00139335	1766.85
640	0	7528	15506			1.34826	0.000845986	0.00114061	1766.85
641	0	7608	15506			1.40513	0.000921529	0.00129487	1766.85
642	0	7688	15506			1.57564	0.00113183	0.00178336	1766.85
643	0	7768	15506			1.41417	0.079416	0.112308	102868
644	0	7848	15506			1.18756	0.00182436	0.00216653	1766.85
645	0	7928	15506			1.36861	0.0024805	0.00339483	1766.85
646	0	8008	15506			1.23711	0.0992955	0.12284	72201.9
647	0	1368	15426			1.3619	0.00267652	0.00364517	1766.85
648	0	1448	15426			1.53196	0.0015905	0.00243658	1766.85
649	0	1528	15426			1.20751	0.00110252	0.0013313	1766.85
650	0	1608	15426			1.87568	0.000749324	0.00140549	1766.85
651	0	1688	15426			1.49908	0.0714421	0.107098	144400
652	0	1768	15426			1.67222	0.000661698	0.00110651	1766.85
653	0	1848	15426			1.46755	0.0569802	0.0836213	158933
654	0	1928	15426			1.30671	0.000811702	0.00106065	1766.85
655	0	2008	15426			1.48877	0.0488936	0.0727916	127714
656	0	2088	15426			1.51965	0.0577342	0.0877361	163235
657	0	2168	15426			1.31041	0.0556725	0.0729537	150278
658	0	2248	15426			1.55661	0.0521492	0.081176	160443
659	0	2328	15426			1.18799	0.0532429	0.0632523	181923
660	0	2408	15426			1.0841	0.0736806	0.0798774	274551
661	0	2488	15426			1.18825	0.0815447	0.0968959	310106
662	0	2568	15426			1.06543	0.091218	0.0971864	333454
663	0	2648	15426			1.19712	0.0634528	0.0759605	184608
664	0	2728	15426			1.03124	0.0518488	0.0534687	145587
665	0	2808	15426			1.12784	0.0655095	0.0738843	225116
666	0	2888	15426			0.942799	0.0799612	0.0753874	241185
667	0	2968	15426			1.06113	0.0779137	0.0826766	256446
668	0	3048	15426			1.10725	0.0925737	0.102502	288907
669	0	3128	15426			1.13145	0.0978181	0.110676	288739
670	0	3208	15426			0.963736	0.135726	0.130804	309248
671	0	3288	15426			0.9811	0.125455	0.123084	341592
672	0	3368	15426			0.915961	0.0686578	0.0628879	208021
673	0	3448	15426			1.03817	0.101566	0.105443	322225
674	0	3528	15426			1.17661	0.0805387	0.0947627	246947
675	0	3608	15426			1.21649	0.0595296	0.0724169	155546
676	0	3688	15426			1.03557	0.0784776	0.0812686	180526
677	0	3768	15426			1.13697	0.104224	0.118499	254064
678	0	3848	15426			1.1288	0.000559657	0.000631739	1766.85
679	0	3928	15426			0.947929	0.103331	0.0979504	292868
680	0	4008	15426			1.28121	0.0824243	0.105603	232216
681	0	4088	15426			1.08586	0.000742539	0.000806291	1766.85
682	0	4168	15426			1.5072	0.0564309	0.0850527	192441
683	0	4248	15426			1.18039	0.0744497	0.0878795	174534
684	0	4328	15426			1.41704	0.0598224	0.0847709	155840
685	0	4408	15426			1.42061	0.0601845	0.0854986	197011
686	0	4488	15426			1.39036	0.0595686	0.082822	187266
687	0	4568	15426			1.28331	0.0577647	0.0741299	178394
688	0	4648	15426			1.42712	0.0426608	0.0608821	148484
689	0	4728	15426			1.40242	0.0609572	0.0854874	239346
690	0	4808	15426			1.59908	0.0682325	0.109109	233889
691	0	4888	15426			1.54609	0.0608261	0.0940429	175887
692	0	4968	15426			1.58691	0.000485393	0.000770277	1766.85
693	0	5048	15426			1.79214	0.0350991	0.0629025	124784
694	0	5128	15426			1.29605	0.000636728	0.00082523	1766.85
695	0	5208	15426			1.70448	0.0727048	0.123924	232700
696	0	5288	15426			1.32082	0.000649043	0.000857273	1766.85
697	0	5368	15426			1.2485	0.0808259	0.100911	204645
698	0	5448	15426			1.18843	0.0938597	0.111546	217945
699	0	5528	15426			1.1431	0.0959175	0.109643	235347
700	0	5608	15426			1.11136	0.000685221	0.000761527	1766.85
701	0	5688	15426			1.0371	0.000831554	0.000862403	1766.85
702	0	5768	15426			1.2267	0.0670526	0.0822534	135458
703	0	5848	15426			1.34778	0.0638583	0.0860667	171594
704	0	5928	15426			1.33221	0.102202	0.136155	244070
705	0	6008	15426			1.19754	0.070143	0.0839991	168551
706	0	6088	15426			1.42172	0.000974489	0.00138545	1766.85
707	0	6168	15426			1.2771	0.0606302	0.0774306	105370
708	0	6248	15426			1.39541	0.000884888	0.00123478	1766.85
709	0	6328	15426			1.20412	0.0643367	0.0774689	121560
710	0	6408	15426			1.3752	0.0850132	0.11691	185631
711	0	6488	15426			1.44436	0.0643315	0.0929175	149085
712	0	6568	15426			1.13115	0.103185	0.116718	201126
713	0	6648	15426			1.27899	0.000952006	0.00121761	1766.85
714	0	6728	15426			1.05725	0.00137752	0.00145638	1766.85
715	0	6808	15426			1.1745	0.0493314	0.0579397	100311
716	0	6888	15426			1.42151	0.000697563	0.000991592	1766.85
717	0	6968	15426			1.43838	0.00073352	0.00105508	1766.85
718	0	7048	15426			1.26781	0.0943833	0.11966	177385
719	0	7128	15426			1.34906	0.000735993	0.000992902	1766.85
720	0	7208	15426			1.35632	0.0497763	0.0675127	122118
721	0	7288	15426			1.48258	0.000641089	0.000950469	1766.85
722	0	7368	15426			1.44348	0.0567297	0.0818884	137096
723	0	7448	15426			1.48283	0.0734772	0.108954	189227
724	0	7528	15426			1.38741	0.000765248	0.00106171	1766.85
725	0	7608	15426			1.38234	0.0688723	0.0952051	149927
726	0	7688	15426			1.33731	0.000845262	0.00113038	1766.85
727	0	7768	15426			1.35771	0.00110143	0.00149541	1766.85
728	0	7848	15426			1.31313	0.00134374	0.00176451	1766.85
729	0	7928	15426			1.63679	0.0774846	0.126826	87370.6
730	0	8008	15426			1.00764	0.105498	0.106304	77893.4
731	0	8088	15426			1.36787	0.07317	0.100087	83170
732	0	8168	15426			1.43389	0.0672354	0.0964085	77289.2
733	0	1288	15346			1.56556	0.00148625	0.00232681	1766.85
734	0	1368	15346			1.27412	0.127816	0.162853	128841
735	0	1448	15346			1.47874	0.00147439	0.00218025	1766.85
736	0	1528	15346			1.44446	0.000896706	0.00129526	1766.85
737	0	1608	15346			1.33078	0.0971029	0.129222	146376
738	0	1688	15346			1.60072	0.000897315	0.00143635	1766.85
739	0	1768	15346			1.50771	0.0745933	0.112465	168363
740	0	1848	15346			1.39536	0.0690596	0.0963629	192440
741	0	1928	15346			1.6356	0.0440311	0.0720172	137786
742	0	2008	15346			1.32563	0.000575219	0.000762527	1766.85
743	0	2088	15346			1.5291	0.000666806	0.00101962	1766.85
744	0	2168	15346			1.52436	0.000533958	0.000813943	1766.85
745	0	2248	15346			1.97495	0.0720979	0.14239	268277
746	0	2328	15346			1.2075	0.0694612	0.0838744	184622
747	0	2408	15346			1.11269	0.0399645	0.0444681	131204
748	0	2488	15346			1.19018	0.0709922	0.0844932	266363
749	0	2568	15346			0.969241	0.0952111	0.0922825	337087
750	0	2648	15346			1.02802	0.094124	0.0967614	332653
751	0	2728	15346			0.979785	0.0722807	0.0708195	212045
752	0	2808	15346			1.30773	0.0719095	0.0940384	247856
753	0	2888	15346			0.947566	0.106726	0.10113	355169
754	0	2968	15346			1.17452	0.111935	0.131469	324922
755	0	3048	15346			1.01056	0.11333	0.114526	263874
756	0	3128	15346			1.00715	0.0973388	0.0980344	196380
757	0	3208	15346			0.798949	0.110617	0.0883771	283817
758	0	3288	15346			1.06889	0.121421	0.129786	290952
759	0	3368	15346			0.82314	0.132602	0.10915	289602
760	0	3448	15346			1.17225	0.0867022	0.101637	225207
761	0	3528	15346			0.888595	0.100645	0.0894323	205496
762	0	3608	15346			0.912284	0.15947	0.145482	349033
763	0	3688	15346			0.940897	0.169994	0.159947	363978
764	0	3768	15346			0.945748	0.220823	0.208843	428325
765	0	3848	15346			0.959736	0.127763	0.122618	271436
766	0	3928	15346			1.20835	0.100428	0.121352	245910
767	0	4008	15346			1.35215	0.115436	0.156087	284478
768	0	4088	15346			1.25308	0.000802696	0.00100585	1766.85
769	0	4168	15346			1.10162	0.0858015	0.0945204	163598
770	0	4248	15346			1.48552	0.0630309	0.0936337	158790
771	0	4328	15346			1.1163	0.0815748	0.0910618	203475
772	0	4408	15346			1.6619	0.0626295	0.104084	203351
773	0	4488	15346			1.231	0.0539609	0.066426	153384
774	0	4568	15346			1.43172	0.0645744	0.0924523	166636
775	0	4648	15346			1.22861	0.0568246	0.0698154	186593
776	0	4728	15346			1.45338	0.0393643	0.0572111	108313
777	0	4808	15346			1.37275	0.0447818	0.0614742	150830
778	0	4888	15346			1.59236	0.0643387	0.10245	200735
779	0	4968	15346			1.53459	0.000569107	0.000873343	1766.85
780	0	5048	15346			1.57693	0.000575483	0.000907495	1766.85
781	0	5128	15346			1.75654	0.0527773	0.0927056	141253
782	0	5208	15346			1.26519	0.000718389	0.000908896	1766.85
783	0	5288	15346			1.29395	0.0536875	0.0694689	137542
784	0	5368	15346			1.17173	0.110218	0.129146	249977
785	0	5448	15346			1.33088	0.00105807	0.00140817	1766.85
786	0	5528	15346			1.47109	0.0959337	0.141127	231456
787	0	5608	15346			1.13778	0.0564906	0.0642738	149756
788	0	5688	15346			1.40538	0.0751791	0.105655	228136
789	0	5768	15346			1.23351	0.0609294	0.0751569	162472
790	0	5848	15346			1.33545	0.0564456	0.0753804	134637
791	0	5928	15346			1.33202	0.000984165	0.00131092	1766.85
792	0	6008	15346			1.44118	0.047669	0.0686994	164722
793	0	6088	15346			1.16656	0.132165	0.154179	214303
794	0	6168	15346			1.27467	0.0659697	0.0840897	137458
795	0	6248	15346			1.26963	0.0729417	0.0926091	173360
796	0	6328	15346			1.27342	0.0492069	0.062661	141168
797	0	6408	15346			1.1043	0.0675844	0.0746333	149417
798	0	6488	15346			1.0132	0.0646626	0.0655165	132066
799	0	6568	15346			1.22253	0.0633023	0.0773891	116635
800	0	6648	15346			1.53837	0.0588521	0.0905366	125175
801	0	6728	15346			1.06999	0.0573395	0.0613526	106406
802	0	6808	15346			1.27763	0.061695	0.0788236	157832
803	0	6888	15346			1.2948	0.000670887	0.000868663	1766.85
804	0	6968	15346			1.58543	0.0488047	0.0773765	137632
805	0	7048	15346			1.4847	0.0588849	0.0874263	159643
806	0	7128	15346			1.35658	0.000697294	0.000945935	1766.85
807	0	7208	15346			1.42048	0.0586759	0.0833478	169613
808	0	7288	15346			1.48788	0.0422429	0.0628524	124762
809	0	7368	15346			1.45358	0.0347707	0.0505419	103645
810	0	7448	15346			1.32234	0.0637709	0.0843265	153273
811	0	7528	15346			1.53956	0.000745847	0.00114828	1766.85
812	0	7608	15346			1.76514	0.000666447	0.00117638	1766.85
813	0	7688	15346			1.71441	0.000757335	0.00129838	1766.85
814	0	7768	15346			1.48067	0.0606562	0.0898117	127615
815	0	7848	15346			1.31127	0.000976955	0.00128105	1766.85
816	0	7928	15346			1.53927	0.0010001	0.00153942	1766.85
817	0	8008	15346			1.28266	0.00147442	0.00189118	1766.85
818	0	8088	15346			1.61382	0.00120185	0.00193957	1766.85
819	0	8168	15346			1.38598	0.0947673	0.131346	118603
820	0	8248	15346			1.3877	0.133241	0.184898	118894
821	0	1208	15266			1.22635	0.00115008	0.0014104	1766.85
822	0	1288	15266			1.61887	0.00137145	0.00222019	1766.85
823	0	1368	15266			1.5747	0.00129788	0.00204377	1766.85
824	0	1448	15266			1.56281	0.000858442	0.00134158	1766.85
825	0	1528	15266			1.29084	0.000884635	0.00114192	1766.85
826	0	1608	15266			1.22926	0.109342	0.134409	148661
827	0	1688	15266			1.77511	0.07087	0.125802	137305
828	0	1768	15266			2.0587	0.0478673	0.0985446	156642
829	0	1848	15266			1.8545	0.000480662	0.000891389	1766.85
830	0	1928	15266			1.41925	0.0724878	0.102878	216103
831	0	2008	15266			1.52865	0.0695596	0.106332	167419
832	0	2088	15266			1.29496	0.0595653	0.0771344	148961
833	0	2168	15266			1.78123	0.000578706	0.00103081	1766.85
834	0	2248	15266			1.4508	0.000594808	0.000862951	1766.85
835	0	2328	15266			1.24346	0.100187	0.124578	314374
836	0	2408	15266			1.08639	0.0960363	0.104333	320848
837	0	2488	15266			0.980304	0.0885531	0.0868089	326055
838	0	2568	15266			1.11932	0.0719807	0.0805693	202400
839	0	2648	15266			1.07727	0.132538	0.14278	323482
840	0	2728	15266			1.05777	0.151079	0.159806	405658
841	0	2808	15266			0.866324	0.130195	0.112791	302363
842	0	2888	15266			0.836341	0.0998062	0.0834721	242864
843	0	2968	15266			0.974006	0.133646	0.130172	255093
844	0	3048	15266			0.767228	0.183159	0.140525	332510
845	0	3128	15266			1.04401	0.13067	0.136421	233629
846	0	3208	15266			0.938123	0.152305	0.142881	243171
847	0	3288	15266			0.986249	0.144701	0.142712	257477
848	0	3368	15266			0.740765	0.173732	0.128695	317076
849	0	3448	15266			0.879609	0.0793972	0.0698385	176021
850	0	3528	15266			0.835972	0.169552	0.14174	326498
851	0	3608	15266			0.797678	0.113338	0.0904076	238797
852	0	3688	15266			0.821346	0.159595	0.131083	272734
853	0	3768	15266			0.804828	0.151064	0.12158	214696
854	0	3848	15266			1.00435	0.104864	0.105319	191305
855	0	3928	15266			1.01912	0.00102671	0.00104634	1766.85
856	0	4008	15266			0.84032	0.00108699	0.000913418	1766.85
857	0	4088	15266			1.13897	0.0931478	0.106093	164818
858	0	4168	15266			1.1435	0.103609	0.118477	171297
859	0	4248	15266			1.0914	0.0981076	0.107075	183730
860	0	4328	15266			1.20352	0.0670153	0.0806541	151880
861	0	4408	15266			1.41778	0.0804648	0.114081	237205
862	0	4488	15266			1.22494	0.0891707	0.109228	193509
863	0	4568	15266			1.44698	0.0689184	0.0997235	182468
864	0	4648	15266			1.3819	0.0750207	0.103671	203679
865	0	4728	15266			1.48388	0.0601494	0.0892543	183021
866	0	4808	15266			1.43469	0.0507218	0.0727699	145488
867	0	4888	15266			1.33927	0.0785896	0.105252	252514
868	0	4968	15266			1.32359	0.0584519	0.0773665	155322
869	0	5048	15266			1.23575	0.0829389	0.102492	219592
870	0	5128	15266			1.41988	0.0528641	0.0750608	138135
871	0	5208	15266			1.47498	0.063448	0.0935847	189583
872	0	5288	15266			1.20668	0.0827621	0.0998675	201328
873	0	5368	15266			1.09787	0.0981084	0.10771	190450
874	0	5448	15266			1.35985	0.0868842	0.118149	174176
875	0	5528	15266			0.896616	0.127328	0.114164	269334
876	0	5608	15266			1.02825	0.10434	0.107288	239131
877	0	5688	15266			1.08276	0.11445	0.123922	296960
878	0	5768	15266			1.08685	0.155591	0.169104	374189
879	0	5848	15266			1.42821	0.0557215	0.079582	110915
880	0	5928	15266			1.5699	0.0839238	0.131752	233611
881	0	6008	15266			1.09494	0.0840299	0.092008	184867
882	0	6088	15266			1.10115	0.0790533	0.0870497	159531
883	0	6168	15266			1.09192	0.101345	0.11066	248495
884	0	6248	15266			1.14467	0.0995861	0.113993	270158
885	0	6328	15266			1.25719	0.121479	0.152722	374228
886	0	6408	15266			1.04703	0.072501	0.0759106	193601
887	0	6488	15266			1.25933	0.0553225	0.0696694	150389
888	0	6568	15266			1.05518	0.000889002	0.000938056	1766.85
889	0	6648	15266			1.09078	0.0930359	0.101482	199590
890	0	6728	15266			1.19866	0.063635	0.0762766	166085
891	0	6808	15266			1.29828	0.0735368	0.0954716	199551
892	0	6888	15266			1.1638	0.0789166	0.0918429	228032
893	0	6968	15266			1.30334	0.0716947	0.093443	192184
894	0	7048	15266			1.36139	0.000772045	0.00105106	1766.85
895	0	7128	15266			1.30303	0.000638348	0.000831787	1766.85
896	0	7208	15266			1.37268	0.0512757	0.0703849	136243
897	0	7288	15266			1.24696	0.0601699	0.0750295	171302
898	0	7368	15266			1.76439	0.0529494	0.0934232	177468
899	0	7448	15266			1.5698	0.0572682	0.0898997	167892
900	0	7528	15266			1.56165	0.0524203	0.0818621	139054
901	0	7608	15266			1.35146	0.0698476	0.0943962	183152
902	0	7688	15266			1.36842	0.0656825	0.0898814	163453
903	0	7768	15266			1.33935	0.0728313	0.0975465	168155
904	0	7848	15266			1.47028	0.000685643	0.00100809	1766.85
905	0	7928	15266			1.64352	0.0735723	0.120918	152508
906	0	8008	15266			1.41866	0.0681209	0.0966404	119155
907	0	8088	15266			1.64175	0.0524728	0.0861471	110497
908	0	8168	15266			1.36199	0.00110856	0.00150985	1766.85
909	0	8248	15266			1.62506	0.096483	0.156791	144762
910	0	8328	15266			1.28154	0.00193134	0.00247509	1766.85
911	0	8408	15266			1.46923	0.00198282	0.00291323	1766.85
912	0	1208	15186			1.27669	0.00105214	0.00134325	1766.85
913	0	1288	15186			1.43549	0.00158716	0.00227835	1766.85
914	0	1368	15186			1.60877	0.00115747	0.00186211	1766.85
915	0	1448	15186			1.33545	0.00100841	0.00134668	1766.85
916	0	1528	15186			1.39432	0.110552	0.154144	224474
917	0	1608	15186			1.4682	0.000955758	0.00140325	1766.85
918	0	1688	15186			1.50423	0.000842224	0.0012669	1766.85
919	0	1768	15186			1.6633	0.0782324	0.130124	192718
920	0	1848	15186			1.38003	0.000631964	0.000872129	1766.85
921	0	1928	15186			1.62384	0.090674	0.14724	234817
922	0	2008	15186			1.3241	0.0574481	0.0760668	143291
923	0	2088	15186			1.53149	0.0573876	0.0878884	153350
924	0	2168	15186			1.38469	0.0641032	0.0887633	153655
925	0	2248	15186			1.56874	0.000635131	0.000996356	1766.85
926	0	2328	15186			1.25405	0.0903956	0.11336	310221
927	0	2408	15186			1.02022	0.119918	0.122342	367379
928	0	2488	15186			0.835209	0.127521	0.106507	355365
929	0	2568	15186			1.09579	0.0855941	0.0937929	197058
930	0	2648	15186			0.974142	0.141825	0.138157	332978
931	0	2728	15186			0.822526	0.214315	0.17628	490232
932	0	2808	15186			1.01237	0.101669	0.102927	241405
933	0	2888	15186			0.833379	0.11708	0.0975723	181369
934	0	2968	15186			0.819658	0.223549	0.183234	316815
935	0	3048	15186			0.798132	0.152347	0.121593	223616
936	0	3128	15186			0.686603	0.210988	0.144865	384262
937	0	3208	15186			0.902109	0.183037	0.165119	342484
938	0	3288	15186			0.765821	0.220934	0.169196	392761
939	0	3368	15186			0.742717	0.129962	0.096525	263754
940	0	3448	15186			0.715597	0.225227	0.161172	442944
941	0	3528	15186			0.889055	0.134264	0.119368	219598
942	0	3608	15186			1.00543	0.0963767	0.0969002	146448
943	0	3688	15186			0.900132	0.131254	0.118146	234551
944	0	3768	15186			0.883704	0.132352	0.11696	222429
945	0	3848	15186			0.937058	0.00105061	0.000984486	1766.85
946	0	3928	15186			0.882082	0.00128988	0.00113778	1766.85
947	0	4008	15186			0.94526	0.124514	0.117698	215793
948	0	4088	15186			1.18006	0.00110043	0.00129858	1766.85
949	0	4168	15186			0.954907	0.0902271	0.0861585	159146
950	0	4248	15186			0.827145	0.244887	0.202557	409656
951	0	4328	15186			0.732338	0.236861	0.173462	348927
952	0	4408	15186			0.912833	0.00127249	0.00116157	1766.85
953	0	4488	15186			0.910779	0.0861374	0.0784522	71639.5
954	0	4568	15186			1.22548	0.0740685	0.0907697	167855
955	0	4648	15186			1.60572	0.0853916	0.137115	284811
956	0	4728	15186			1.13156	0.101372	0.114709	285822
957	0	4808	15186			1.19415	0.0941807	0.112466	312957
958	0	4888	15186			1.37555	0.0765028	0.105234	211868
959	0	4968	15186			1.16708	0.0518399	0.0605015	148529
960	0	5048	15186			1.50944	0.0986291	0.148875	314298
961	0	5128	15186			1.1674	0.103669	0.121023	270135
962	0	5208	15186			1.24544	0.117696	0.146583	298251
963	0	5288	15186			1.293	0.102703	0.132795	233183
964	0	5368	15186			1.30207	0.0789417	0.102788	181514
965	0	5448	15186			1.24429	0.085764	0.106715	238860
966	0	5528	15186			1.35177	0.0927693	0.125403	215639
967	0	5608	15186			1.16963	0.111896	0.130877	269041
968	0	5688	15186			1.1641	0.0934519	0.108787	241110
969	0	5768	15186			0.901949	0.0986179	0.0889484	218599
970	0	5848	15186			0.988285	0.0805439	0.0796003	160415
971	0	5928	15186			0.911903	0.0791157	0.0721459	146835
972	0	6008	15186			1.29552	0.0750915	0.0972822	194665
973	0	6088	15186			0.971548	0.143516	0.139432	351080
974	0	6168	15186			1.10007	0.102841	0.113132	295528
975	0	6248	15186			1.24711	0.0835177	0.104156	237378
976	0	6328	15186			1.05008	0.114658	0.1204	309330
977	0	6408	15186			1.08228	0.129782	0.14046	334530
978	0	6488	15186			1.12647	0.0945961	0.10656	252661
979	0	6568	15186			1.20437	0.0816475	0.0983336	207649
980	0	6648	15186			0.993091	0.10489	0.104165	227528
981	0	6728	15186			1.3321	0.0606615	0.0808071	195018
982	0	6808	15186			1.19962	0.0789597	0.094722	255113
983	0	6888	15186			1.6713	0.0437039	0.0730425	142788
984	0	6968	15186			1.32574	0.0393308	0.0521424	126808
985	0	7048	15186			1.54411	0.0407702	0.0629537	129194
986	0	7128	15186			1.24882	0.0442518	0.0552624	118269
987	0	7208	15186			1.24705	0.000688547	0.000858654	1766.85
988	0	7288	15186			1.23481	0.0686788	0.084805	194441
989	0	7368	15186			1.52546	0.0603319	0.0920337	171090
990	0	7448	15186			1.40294	0.0604104	0.0847518	193592
991	0	7528	15186			1.35225	0.000610656	0.000825762	1766.85
992	0	7608	15186			1.72037	0.0477998	0.0822334	146457
993	0	7688	15186			1.44488	0.000625079	0.000903167	1766.85
994	0	7768	15186			1.35411	0.000670873	0.000908436	1766.85
995	0	7848	15186			1.59679	0.00066597	0.00106342	1766.85
996	0	7928	15186			1.62735	0.000728595	0.00118567	1766.85
997	0	8008	15186			1.61925	0.000822807	0.00133233	1766.85
998	0	8088	15186			1.52186	0.00088915	0.00135316	1766.85
999	0	8168	15186			1.43207	0.0704804	0.100933	126616
1000	0	8248	15186			1.41438	0.00110819	0.00156741	1766.85
1001	0	8328	15186			1.47029	0.086465	0.127129	113796
1002	0	8408	15186			1.66909	0.00192654	0.00321557	1766.85
1003	0	8488	15186			1.19207	0.00281362	0.00335402	1766.85
1004	0	1128	15106			1.32841	0.0852523	0.11325	164266
1005	0	1208	15106			1.01913	0.00154952	0.00157917	1766.85
1006	0	1288	15106			1.57908	0.00101267	0.00159908	1766.85
1007	0	1368	15106			1.60466	0.0730218	0.117175	142533
1008	0	1448	15106			2.33125	0.00064712	0.0015086	1766.85
1009	0	1528	15106			2.13802	0.000867797	0.00185537	1766.85
1010	0	1608	15106			1.69758	0.105476	0.179055	203343
1011	0	1688	15106			1.69531	0.00071512	0.00121235	1766.85
1012	0	1768	15106			1.50974	0.000983587	0.00148496	1766.85
1013	0	1848	15106			1.3174	0.082929	0.109251	153375
1014	0	1928	15106			1.41298	0.000627871	0.000887172	1766.85
1015	0	2008	15106			1.38538	0.0871209	0.120696	149909
1016	0	2088	15106			1.15853	0.00111637	0.00129335	1766.85
1017	0	2168	15106			1.16369	0.100283	0.116698	240109
1018	0	2248	15106			1.236	0.0752228	0.0929751	187855
1019	0	2328	15106			1.38573	0.105886	0.14673	306327
1020	0	2408	15106			0.866606	0.163046	0.141297	370012
1021	0	2488	15106			1.04469	0.152786	0.159614	327256
1022	0	2568	15106			1.0271	0.00142392	0.00146251	1766.85
1023	0	2648	15106			0.808024	0.184669	0.149217	238638
1024	0	2728	15106			0.887943	0.191127	0.16971	369720
1025	0	2808	15106			0.766792	0.249767	0.191519	371622
1026	0	2888	15106			0.698168	0.247009	0.172454	264445
1027	0	2968	15106			0.645851	0.241757	0.156139	344582
1028	0	3048	15106			0.845229	0.248342	0.209906	475779
1029	0	3128	15106			0.834554	0.17295	0.144336	277646
1030	0	3208	15106			0.722746	0.261241	0.188811	455763
1031	0	3288	15106			0.74368	0.185287	0.137794	357769
1032	0	3368	15106			0.476222	0.26442	0.125923	352310
1033	0	3448	15106			0.663698	0.268962	0.17851	576587
1034	0	3528	15106			0.751819	0.120389	0.0905108	218419
1035	0	3608	15106			0.811537	0.116424	0.0944822	184863
1036	0	3688	15106			0.698814	0.135655	0.0947974	178858
1037	0	3768	15106			0.737847	0.123068	0.090805	166021
1038	0	3848	15106			0.768265	0.104953	0.0806319	117799
1039	0	3928	15106			0.719543	0.105038	0.0755794	130821
1040	0	4008	15106			0.884438	0.11092	0.0981019	193217
1041	0	4088	15106			0.861682	0.156725	0.135047	193133
1042	0	4168	15106			0.70761	0.108462	0.0767484	119273
1043	0	4248	15106			0.595712	0.214142	0.127567	275715
1044	0	4328	15106			0.947957	0.00116328	0.00110274	1766.85
1045	0	4408	15106			0.930743	0.124602	0.115972	179574
1046	0	4488	15106			0.860037	0.00124059	0.00106695	1766.85
1047	0	4568	15106			1.28935	0.00090146	0.0011623	1766.85
1048	0	4648	15106			1.2127	0.0976687	0.118443	190575
1049	0	4728	15106			1.29882	0.077207	0.100278	190302
1050	0	4808	15106			1.11791	0.135148	0.151083	327220
1051	0	4888	15106			1.296	0.069892	0.09058	170155
1052	0	4968	15106			1.19626	0.108983	0.130373	201765
1053	0	5048	15106			1.44297	0.0786115	0.113434	170130
1054	0	5128	15106			0.982484	0.136544	0.134152	271564
1055	0	5208	15106			1.02655	0.15017	0.154157	374263
1056	0	5288	15106			1.1589	0.0666343	0.0772227	155777
1057	0	5368	15106			1.12795	0.127426	0.14373	227929
1058	0	5448	15106			1.12662	0.00100419	0.00113135	1766.85
1059	0	5528	15106			0.969081	0.187398	0.181604	300639
1060	0	5608	15106			1.12282	0.155127	0.17418	299428
1061	0	5688	15106			0.886856	0.206339	0.182993	415416
1062	0	5768	15106			0.962708	0.112222	0.108037	262300
1063	0	5848	15106			0.869714	0.153088	0.133143	355500
1064	0	5928	15106			1.07174	0.195272	0.209281	528576
1065	0	6008	15106			0.862198	0.212152	0.182917	568584
1066	0	6088	15106			0.930154	0.144012	0.133953	377638
1067	0	6168	15106			0.853594	0.160491	0.136994	373301
1068	0	6248	15106			0.722285	0.183251	0.13236	456464
1069	0	6328	15106			0.790746	0.118664	0.0938327	316762
1070	0	6408	15106			1.13428	0.134088	0.152095	471987
1071	0	6488	15106			0.945933	0.122793	0.116154	336357
1072	0	6568	15106			0.974315	0.106129	0.103403	239781
1073	0	6648	15106			1.08179	0.068043	0.0736084	183011
1074	0	6728	15106			1.12437	0.102828	0.115617	310267
1075	0	6808	15106			1.33408	0.0638899	0.0852343	212086
1076	0	6888	15106			1.22483	0.0848014	0.103867	254084
1077	0	6968	15106			1.24954	0.0541583	0.0676729	175547
1078	0	7048	15106			1.15893	0.0611048	0.0708163	190564
1079	0	7128	15106			1.22111	0.0672	0.0820587	198744
1080	0	7208	15106			1.32666	0.0464961	0.0616843	158714
1081	0	7288	15106			1.35558	0.0904764	0.122648	274180
1082	0	7368	15106			1.38271	0.0564365	0.0780353	196165
1083	0	7448	15106			1.25528	0.0842946	0.105814	253030
1084	0	7528	15106			1.36548	0.0366996	0.0501127	122725
1085	0	7608	15106			1.65534	0.00063923	0.00105815	1766.85
1086	0	7688	15106			1.93923	0.000513295	0.000995395	1766.85
1087	0	7768	15106			1.30743	0.000821204	0.00107367	1766.85
1088	0	7848	15106			1.45591	0.0720089	0.104839	163560
1089	0	7928	15106			1.52414	0.0677405	0.103246	154495
1090	0	8008	15106			1.85232	0.000681168	0.00126174	1766.85
1091	0	8088	15106			1.61954	0.000890499	0.0014422	1766.85
1092	0	8168	15106			1.62874	0.000775869	0.00126369	1766.85
1093	0	8248	15106			1.42887	0.000767223	0.00109626	1766.85
1094	0	8328	15106			2.0225	0.00119489	0.00241667	1766.85
1095	0	8408	15106			1.70294	0.00141189	0.00240436	1766.85
1096	0	8488	15106			1.25869	0.00317973	0.0040023	1766.85
1097	0	8568	15106			1.62067	0.186914	0.302926	36240.7
1098	0	8648	15106			1.81812	0.112816	0.205113	43884.4
1099	0	1048	15026			1.23448	0.000473905	0.000585025	1766.85
1100	0	1128	15026			1.30609	0.000796417	0.00104019	1766.85
1101	0	1208	15026			1.66969	0.000782945	0.00130728	1766.85
1102	0	1288	15026			1.55907	0.0741791	0.115651	208261
1103	0	1368	15026			1.8156	0.000713157	0.0012948	1766.85
1104	0	1448	15026			2.23553	0.0707536	0.158172	214822
1105	0	1528	15026			1.90934	0.00080283	0.00153287	1766.85
1106	0	1608	15026			1.44507	0.000912796	0.00131906	1766.85
1107	0	1688	15026			1.36271	0.000976759	0.00133103	1766.85
1108	0	1768	15026			1.52148	0.0692856	0.105417	147254
1109	0	1848	15026			1.53412	0.000855923	0.00131309	1766.85
1110	0	1928	15026			1.58551	0.0565517	0.0896632	149572
1111	0	2008	15026			1.29137	0.0544977	0.0703769	141135
1112	0	2088	15026			1.34882	0.0914168	0.123305	233550
1113	0	2168	15026			1.02491	0.000887301	0.000909405	1766.85
1114	0	2248	15026			1.14247	0.000858284	0.00098056	1766.85
1115	0	2328	15026			0.98773	0.180788	0.17857	465271
1116	0	2408	15026			0.780203	0.172933	0.134923	427243
1117	0	2488	15026			0.784167	0.153272	0.120191	260356
1118	0	2568	15026			1.01439	0.160178	0.162484	84041.3
1119	0	2648	15026			0.462924	0.0171413	0.00793512	1766.85
1120	0	2728	15026			0.622057	0.304404	0.189356	103408
1121	0	2808	15026			0.554262	0.355961	0.197296	258729
1122	0	2888	15026			0.51072	0.201001	0.102655	297778
1123	0	2968	15026			0.598655	0.148633	0.0889799	250808
1124	0	3048	15026			0.667742	0.182143	0.121625	308625
1125	0	3128	15026			0.617745	0.365136	0.225561	530044
1126	0	3208	15026			0.834525	0.223907	0.186856	339988
1127	0	3288	15026			0.673515	0.228731	0.154054	329430
1128	0	3368	15026			0.46481	0.388171	0.180426	201544
1129	0	3448	15026			0.535591	0.189519	0.101505	229564
1130	0	3528	15026			0.596104	0.173654	0.103516	253704
1131	0	3608	15026			0.562354	0.207035	0.116427	190036
1132	0	3688	15026			0.665957	0.164842	0.109777	139409
1133	0	3768	15026			0.490118	0.226503	0.111013	120115
1134	0	3848	15026			0.33014	0.324552	0.107148	44003.7
1135	0	3928	15026			0.587883	0.00894054	0.00525599	1766.85
1136	0	4008	15026			0.493886	0.113434	0.0560235	84972.6
1137	0	4088	15026			0.485123	0.147933	0.0717656	68699.9
1138	0	4168	15026			0.711722	0.164523	0.117094	135993
1139	0	4248	15026			0.4167	0.254071	0.105871	147795
1140	0	4328	15026			0.849044	0.00125736	0.00106755	1766.85
1141	0	4408	15026			0.861528	0.0015893	0.00136923	1766.85
1142	0	4488	15026			1.2909	0.00100537	0.00129784	1766.85
1143	0	4568	15026			1.19363	0.000981047	0.00117101	1766.85
1144	0	4648	15026			1.27586	0.000924685	0.00117977	1766.85
1145	0	4728	15026			0.819078	0.185106	0.151616	270676
1146	0	4808	15026			0.895744	0.000963919	0.000863425	1766.85
1147	0	4888	15026			1.0122	0.133144	0.134768	215770
1148	0	4968	15026			1.21285	0.103055	0.124991	226272
1149	0	5048	15026			1.12055	0.0989827	0.110916	201995
1150	0	5128	15026			1.37299	0.156628	0.215049	359175
1151	0	5208	15026			1.01833	0.170163	0.173281	334880
1152	0	5288	15026			1.17408	0.166145	0.195068	270126
1153	0	5368	15026			0.99674	0.00129793	0.0012937	1766.85
1154	0	5448	15026			0.98241	0.0013408	0.00131721	1766.85
1155	0	5528	15026			0.954627	0.00146798	0.00140137	1766.85
1156	0	5608	15026			1.0529	0.190999	0.201103	211664
1157	0	5688	15026			1.06192	0.156871	0.166584	264767
1158	0	5768	15026			0.994021	0.149695	0.1488	256186
1159	0	5848	15026			1.04787	0.116755	0.122344	426919
1160	0	5928	15026			1.01687	0.0900498	0.0915693	327134
1161	0	6008	15026			0.98856	0.167748	0.165828	598004
1162	0	6088	15026			0.893554	0.126782	0.113287	329600
1163	0	6168	15026			0.864349	0.14253	0.123196	531977
1164	0	6248	15026			0.856053	0.16768	0.143543	549326
1165	0	6328	15026			0.892288	0.152505	0.136079	430272
1166	0	6408	15026			1.01665	0.215347	0.218933	446038
1167	0	6488	15026			0.812697	0.186657	0.151695	464863
1168	0	6568	15026			1.05331	0.140981	0.148496	430788
1169	0	6648	15026			1.06214	0.144859	0.153861	404862
1170	0	6728	15026			1.22664	0.0932986	0.114444	316660
1171	0	6808	15026			1.02587	0.081961	0.0840809	204436
1172	0	6888	15026			1.26167	0.0901259	0.113709	289543
1173	0	6968	15026			1.40065	0.080632	0.112938	243022
1174	0	7048	15026			1.20278	0.0824009	0.0991101	230724
1175	0	7128	15026			1.26774	0.0395263	0.0501089	115214
1176	0	7208	15026			1.24215	0.0756114	0.0939206	260865
1177	0	7288	15026			1.34759	0.0713372	0.096133	259459
1178	0	7368	15026			1.15665	0.0863962	0.0999304	297582
1179	0	7448	15026			1.37235	0.0568075	0.07796	202725
1180	0	7528	15026			1.38341	0.0778987	0.107766	246881
1181	0	7608	15026			1.53705	0.0482848	0.0742162	153334
1182	0	7688	15026			1.67553	0.000568832	0.000953097	1766.85
1183	0	7768	15026			1.57178	0.000589338	0.000926309	1766.85
1184	0	7848	15026			1.53566	0.000642531	0.000986711	1766.85
1185	0	7928	15026			1.47578	0.00069281	0.00102244	1766.85
1186	0	8008	15026			1.67075	0.0558161	0.0932549	138842
1187	0	8088	15026			1.35394	0.074565	0.100957	158757
1188	0	8168	15026			1.5866	0.000593902	0.000942283	1766.85
1189	0	8248	15026			1.48026	0.0832197	0.123187	184670
1190	0	8328	15026			1.40066	0.000934585	0.00130904	1766.85
1191	0	8408	15026			1.88301	0.00125279	0.00235901	1766.85
1192	0	8488	15026			1.58207	0.00197284	0.00312116	1766.85
1193	0	8568	15026			1.56338	0.108915	0.170276	72937.3
1194	0	8648	15026			1.44935	0.0047001	0.00681206	1766.85
1195	0	8728	15026			1.51	0.00179411	0.0027091	1766.85
1196	0	8808	15026			1.72251	0.00302119	0.00520403	1766.85
1197	0	968	14946			1.23619	0.000616931	0.000762646	1766.85
1198	0	1048	14946			1.15895	0.0522707	0.0605793	162610
1199	0	1128	14946			1.41545	0.000543786	0.000769704	1766.85
1200	0	1208	14946			1.53411	0.0468246	0.0718343	139488
1201	0	1288	14946			1.77706	0.000690518	0.00122709	1766.85
1202	0	1368	14946			1.38687	0.000915375	0.00126951	1766.85
1203	0	1448	14946			1.58699	0.000821731	0.00130408	1766.85
1204	0	1528	14946			1.56685	0.00100266	0.00157101	1766.85
1205	0	1608	14946			1.36178	0.000879039	0.00119706	1766.85
1206	0	1688	14946			1.48558	0.000701229	0.00104173	1766.85
1207	0	1768	14946			1.68124	0.000906543	0.00152412	1766.85
1208	0	1848	14946			1.44632	0.000933963	0.00135081	1766.85
1209	0	1928	14946			1.27357	0.0673843	0.0858189	139646
1210	0	2008	14946			1.16161	0.102437	0.118991	182440
1211	0	2088	14946			1.13082	0.0840956	0.0950973	207492
1212	0	2168	14946			1.11176	0.10261	0.114079	206240
1213	0	2248	14946			0.9572	0.0912007	0.0872974	144194
1214	0	2328	14946			1.06868	0.130695	0.139671	255070
1215	0	2408	14946			0.791536	0.210838	0.166886	296189
1216	0	2488	14946			0.926588	0.190049	0.176097	227906
1217	0	2568	14946			0.509228	0.00929205	0.00473178	1766.85
1218	0	2648	14946			0.580608	0.324494	0.188404	29793.3
1219	0	2728	14946			0.491419	0.213398	0.104868	271446
1220	0	2808	14946			0.535857	0.226894	0.121583	216299
1221	0	2888	14946			0.56175	0.213622	0.120002	204121
1222	0	2968	14946			0.596829	0.144613	0.0863094	162998
1223	0	3048	14946			0.545249	0.279359	0.15232	337352
1224	0	3128	14946			0.788965	0.193623	0.152762	296821
1225	0	3208	14946			0.667885	0.140097	0.093569	190411
1226	0	3288	14946			0.746218	0.166908	0.12455	274502
1227	0	3368	14946			0.792587	0.163935	0.129933	269428
1228	0	3448	14946			0.829722	0.145888	0.121046	245768
1229	0	3528	14946			0.650753	0.149254	0.0971271	193577
1230	0	3608	14946			0.414606	0.140379	0.0582019	66491.8
1231	0	3688	14946			0.505154	0.00317266	0.00160268	1766.85
1232	0	3768	14946			0.349954	0.314849	0.110183	137672
1233	0	3848	14946			0.44706	0.225998	0.101035	114037
1234	0	3928	14946			0.43698	0.152594	0.0666803	48262.1
1235	0	4008	14946			0.540739	0.209354	0.113206	73025.5
1236	0	4088	14946			0.590835	0.127508	0.0753364	140256
1237	0	4168	14946			0.593988	0.11729	0.0696691	141717
1238	0	4248	14946			0.897377	0.104284	0.0935816	165267
1239	0	4328	14946			0.764511	0.113861	0.087048	149178
1240	0	4408	14946			1.01709	0.000968804	0.000985365	1766.85
1241	0	4488	14946			1.13898	0.0941263	0.107208	167534
1242	0	4568	14946			1.16657	0.129954	0.1516	201150
1243	0	4648	14946			1.04958	0.165234	0.173427	213332
1244	0	4728	14946			1.0614	0.126741	0.134523	254008
1245	0	4808	14946			1.06298	0.150256	0.159719	307745
1246	0	4888	14946			0.958828	0.16681	0.159942	322322
1247	0	4968	14946			0.911892	0.122467	0.111677	277222
1248	0	5048	14946			0.974776	0.113083	0.11023	222959
1249	0	5128	14946			0.952239	0.0974458	0.0927917	217072
1250	0	5208	14946			0.940222	0.101102	0.0950584	225358
1251	0	5288	14946			1.1147	0.0012636	0.00140854	1766.85
1252	0	5368	14946			1.45783	0.084784	0.123601	159770
1253	0	5448	14946			1.33587	0.00106328	0.00142041	1766.85
1254	0	5528	14946			1.1831	0.0942251	0.111477	175798
1255	0	5608	14946			0.915061	0.00143714	0.00131507	1766.85
1256	0	5688	14946			0.904528	0.149986	0.135666	336833
1257	0	5768	14946			1.16547	0.0837003	0.0975502	262221
1258	0	5848	14946			1.06619	0.0878242	0.0936372	335391
1259	0	5928	14946			1.0425	0.0834212	0.0869664	355291
1260	0	6008	14946			0.94537	0.25037	0.236692	795558
1261	0	6088	14946			0.76429	0.187907	0.143615	669072
1262	0	6168	14946			0.794603	0.205575	0.163351	723334
1263	0	6248	14946			0.920614	0.163955	0.15094	594548
1264	0	6328	14946			1.12487	0.166493	0.187282	337191
1265	0	6408	14946			1.02826	0.125526	0.129073	281771
1266	0	6488	14946			0.982952	0.107029	0.105204	243286
1267	0	6568	14946			0.875218	0.12503	0.109429	451826
1268	0	6648	14946			0.802262	0.197869	0.158743	441881
1269	0	6728	14946			1.12003	0.141328	0.158292	378913
1270	0	6808	14946			0.967306	0.0696867	0.0674083	190483
1271	0	6888	14946			1.11999	0.108593	0.121623	318258
1272	0	6968	14946			1.21031	0.000662581	0.000801926	1766.85
1273	0	7048	14946			1.08565	0.125241	0.135968	316007
1274	0	7128	14946			1.17879	0.108976	0.12846	325821
1275	0	7208	14946			1.2658	0.0736978	0.0932868	250554
1276	0	7288	14946			1.27759	0.0746491	0.0953708	218480
1277	0	7368	14946			1.16322	0.0445239	0.0517909	150910
1278	0	7448	14946			1.5245	0.0382353	0.0582896	139632
1279	0	7528	14946			1.69511	0.0539194	0.0913991	194021
1280	0	7608	14946			1.44484	0.0415858	0.0600848	150549
1281	0	7688	14946			1.34504	0.0479553	0.0645017	155377
1282	0	7768	14946			1.45544	0.0532268	0.0774684	173086
1283	0	7848	14946			1.86738	0.000429741	0.000802489	1766.85
1284	0	7928	14946			1.53919	0.0420973	0.0647956	138195
1285	0	8008	14946			1.67063	0.0567745	0.094849	198240
1286	0	8088	14946			1.77242	0.000625092	0.00110793	1766.85
1287	0	8168	14946			1.81578	0.000567364	0.00103021	1766.85
1288	0	8248	14946			1.9467	0.0487288	0.0948604	145215
1289	0	8328	14946			1.41212	0.0012001	0.00169469	1766.85
1290	0	8408	14946			1.53787	0.00113258	0.00174175	1766.85
1291	0	8488	14946			1.28226	0.00130052	0.0016676	1766.85
1292	0	8568	14946			1.5723	0.00149927	0.0023573	1766.85
1293	0	8648	14946			2.01423	0.00169333	0.00341075	1766.85
1294	0	8728	14946			1.39052	0.0023939	0.00332877	1766.85
1295	0	8808	14946			1.48271	0.0399876	0.0592902	52267.6
1296	0	8888	14946			1.61089	0.00372027	0.00599295	1766.85
1297	0	968	14866			1.16515	0.000557433	0.000649495	1766.85
1298	0	1048	14866			1.34635	0.000452366	0.000609042	1766.85
1299	0	1128	14866			1.4151	0.0877662	0.124198	292108
1300	0	1208	14866			1.36696	0.0403063	0.0550973	111229
1301	0	1288	14866			1.72243	0.0782787	0.134829	209572
1302	0	1368	14866			1.56074	0.000604005	0.000942694	1766.85
1303	0	1448	14866			1.51097	0.000666152	0.00100654	1766.85
1304	0	1528	14866			1.73395	0.00100046	0.00173474	1766.85
1305	0	1608	14866			1.46613	0.000993516	0.00145662	1766.85
1306	0	1688	14866			1.79894	0.000819837	0.00147484	1766.85
1307	0	1768	14866			1.39589	0.0751098	0.104845	148817
1308	0	1848	14866			1.23404	0.0705528	0.0870647	161220
1309	0	1928	14866			1.61092	0.00081069	0.00130596	1766.85
1310	0	2008	14866			1.25203	0.0940245	0.117721	160958
1311	0	2088	14866			1.31785	0.0803132	0.105841	155545
1312	0	2168	14866			1.05098	0.00114948	0.00120808	1766.85
1313	0	2248	14866			0.938776	0.00132237	0.0012414	1766.85
1314	0	2328	14866			0.817968	0.190786	0.156057	327509
1315	0	2408	14866			0.701553	0.289781	0.203297	379488
1316	0	2488	14866			0.536153	0.273564	0.146672	198259
1317	0	2568	14866			0.441626	0.337408	0.149008	265687
1318	0	2648	14866			0.397075	0.363117	0.144185	214401
1319	0	2728	14866			0.423903	0.262822	0.111411	209897
1320	0	2808	14866			0.443287	0.322114	0.142789	213387
1321	0	2888	14866			0.443505	0.285903	0.126799	198595
1322	0	2968	14866			0.620996	0.254038	0.157757	337722
1323	0	3048	14866			0.55026	0.450226	0.247741	481053
1324	0	3128	14866			0.611382	0.292112	0.178592	366035
1325	0	3208	14866			0.699138	0.296905	0.207578	399572
1326	0	3288	14866			0.726583	0.192093	0.139572	301158
1327	0	3368	14866			0.751102	0.111833	0.0839977	150098
1328	0	3448	14866			0.77987	0.133557	0.104157	251223
1329	0	3528	14866			0.71545	0.172367	0.12332	248552
1330	0	3608	14866			0.543658	0.111804	0.0607829	88585.2
1331	0	3688	14866			0.495479	0.300232	0.148759	112828
1332	0	3768	14866			0.449298	0.160732	0.0722163	45146.3
1333	0	3848	14866			0.708961	0.124197	0.0880511	118373
1334	0	3928	14866			0.604844	0.00159244	0.00096318	1766.85
1335	0	4008	14866			0.629554	0.151431	0.0953337	184096
1336	0	4088	14866			0.800293	0.13662	0.109336	205670
1337	0	4168	14866			0.878215	0.117875	0.103519	205912
1338	0	4248	14866			0.854429	0.124184	0.106107	245006
1339	0	4328	14866			0.832593	0.138941	0.115681	296555
1340	0	4408	14866			0.844417	0.0740079	0.0624935	124484
1341	0	4488	14866			1.1524	0.123431	0.142242	251664
1342	0	4568	14866			0.879869	0.133802	0.117728	210405
1343	0	4648	14866			0.895135	0.0791576	0.0708567	134796
1344	0	4728	14866			1.09228	0.0964725	0.105375	184285
1345	0	4808	14866			1.00477	0.117648	0.11821	257694
1346	0	4888	14866			1.0902	0.088051	0.0959934	195624
1347	0	4968	14866			1.03479	0.0907051	0.0938604	201260
1348	0	5048	14866			0.957625	0.114577	0.109722	208679
1349	0	5128	14866			1.06603	0.091428	0.0974652	233336
1350	0	5208	14866			1.02479	0.000830177	0.000850761	1766.85
1351	0	5288	14866			1.3443	0.00124749	0.001677	1766.85
1352	0	5368	14866			0.833467	0.154504	0.128774	170419
1353	0	5448	14866			1.18136	0.0009826	0.00116081	1766.85
1354	0	5528	14866			1.06233	0.00116423	0.00123679	1766.85
1355	0	5608	14866			0.933367	0.198195	0.184989	296376
1356	0	5688	14866			0.873944	0.174931	0.15288	315241
1357	0	5768	14866			0.711407	0.172829	0.122952	306860
1358	0	5848	14866			0.862665	0.126579	0.109195	253077
1359	0	5928	14866			1.08553	0.102675	0.111457	425733
1360	0	6008	14866			0.865266	0.14508	0.125533	505384
1361	0	6088	14866			1.02264	0.194579	0.198984	617776
1362	0	6168	14866			0.761145	0.239316	0.182154	658437
1363	0	6248	14866			0.783552	0.226295	0.177314	778500
1364	0	6328	14866			0.956581	0.101131	0.0967404	408015
1365	0	6408	14866			0.972414	0.115228	0.112049	384677
1366	0	6488	14866			1.07726	0.0767306	0.0826586	157887
1367	0	6568	14866			0.825965	0.202334	0.167121	439621
1368	0	6648	14866			0.704837	0.227923	0.160649	585598
1369	0	6728	14866			0.805183	0.150205	0.120942	546806
1370	0	6808	14866			0.97258	0.156534	0.152242	456092
1371	0	6888	14866			1.01051	0.0983558	0.0993898	228194
1372	0	6968	14866			0.894677	0.137794	0.123281	315796
1373	0	7048	14866			0.806774	0.144758	0.116787	384254
1374	0	7128	14866			0.967267	0.136162	0.131706	428435
1375	0	7208	14866			1.12898	0.110747	0.125031	319484
1376	0	7288	14866			1.1997	0.112731	0.135244	214305
1377	0	7368	14866			1.43345	0.0677704	0.0971453	223963
1378	0	7448	14866			1.46593	0.0582492	0.0853892	180949
1379	0	7528	14866			1.44118	0.0492435	0.0709689	157191
1380	0	7608	14866			1.42625	0.0519202	0.0740511	174831
1381	0	7688	14866			1.4024	0.0490401	0.0687738	171365
1382	0	7768	14866			1.66015	0.0511998	0.0849991	173484
1383	0	7848	14866			1.59333	0.039787	0.0633937	147359
1384	0	7928	14866			1.89171	0.0710493	0.134405	236462
1385	0	8008	14866			1.47109	0.0539764	0.079404	190953
1386	0	8088	14866			1.71127	0.0490962	0.0840166	151131
1387	0	8168	14866			1.79876	0.000546682	0.000983353	1766.85
1388	0	8248	14866			1.52936	0.0503374	0.0769842	135439
1389	0	8328	14866			1.39661	0.0568215	0.0793576	129803
1390	0	8408	14866			1.02516	0.0012981	0.00133077	1766.85
1391	0	8488	14866			1.56506	0.000977794	0.00153031	1766.85
1392	0	8568	14866			1.68508	0.0807486	0.136068	162753
1393	0	8648	14866			1.56261	0.000996311	0.00155685	1766.85
1394	0	8728	14866			1.62806	0.071503	0.116411	105612
1395	0	8808	14866			1.58592	0.0756942	0.120045	62020.1
1396	0	8888	14866			1.68305	0.0396393	0.0667152	60885.9
1397	0	8968	14866			1.09603	0.0128217	0.0140529	1766.85
1398	0	9048	14866			1.91471	0.00520024	0.00995697	1766.85
1399	0	888	14786			1.01077	0.00139237	0.00140737	1766.85
1400	0	968	14786			1.39352	0.000481841	0.000671453	1766.85
1401	0	1048	14786			1.48811	0.0511209	0.0760734	189492
1402	0	1128	14786			1.50605	0.0332866	0.0501314	124133
1403	0	1208	14786			1.7097	0.00046788	0.000799936	1766.85
1404	0	1288	14786			1.5921	0.0772524	0.122993	209180
1405	0	1368	14786			1.58532	0.000737236	0.00116875	1766.85
1406	0	1448	14786			1.33157	0.0698833	0.0930542	133867
1407	0	1528	14786			1.70347	0.000980838	0.00167083	1766.85
1408	0	1608	14786			1.95244	0.000983573	0.00192037	1766.85
1409	0	1688	14786			1.06872	0.00113549	0.00121352	1766.85
1410	0	1768	14786			1.02871	0.00125828	0.0012944	1766.85
1411	0	1848	14786			1.47962	0.0812792	0.120262	166678
1412	0	1928	14786			1.09178	0.0827195	0.0903115	119122
1413	0	2008	14786			0.796384	0.00391578	0.00311846	1766.85
1414	0	2088	14786			0.716653	0.186936	0.133968	50243.4
1415	0	2168	14786			1.09251	0.204218	0.223111	260681
1416	0	2248	14786			0.739392	0.32851	0.242898	318415
1417	0	2328	14786			0.618988	0.23062	0.142751	343996
1418	0	2408	14786			0.430277	0.400774	0.172444	206991
1419	0	2488	14786			0.467989	0.297531	0.139241	156351
1420	0	2568	14786			0.437706	0.280046	0.122578	231100
1421	0	2648	14786			0.414274	0.334806	0.138702	295810
1422	0	2728	14786			0.410413	0.367743	0.150927	268270
1423	0	2808	14786			0.327871	0.525603	0.17233	159652
1424	0	2888	14786			0.485072	0.450823	0.218681	285331
1425	0	2968	14786			0.490567	0.399785	0.196121	476424
1426	0	3048	14786			0.514247	0.406816	0.209204	639198
1427	0	3128	14786			0.565614	0.266939	0.150984	453505
1428	0	3208	14786			0.51512	0.338937	0.174593	598924
1429	0	3288	14786			0.493431	0.275122	0.135754	383442
1430	0	3368	14786			0.714829	0.182153	0.130208	265986
1431	0	3448	14786			0.619197	0.186655	0.115576	278449
1432	0	3528	14786			0.57128	0.137863	0.0787585	172598
1433	0	3608	14786			0.460121	0.213926	0.098432	209310
1434	0	3688	14786			0.557691	0.18548	0.103441	188582
1435	0	3768	14786			0.585587	0.184755	0.10819	165174
1436	0	3848	14786			0.816664	0.130132	0.106274	180142
1437	0	3928	14786			0.824605	0.112668	0.0929061	215561
1438	0	4008	14786			1.01492	0.102801	0.104334	239650
1439	0	4088	14786			0.929306	0.1123	0.104361	221872
1440	0	4168	14786			0.923512	0.0635803	0.0587172	139617
1441	0	4248	14786			1.01058	0.119054	0.120314	235311
1442	0	4328	14786			1.09963	0.115091	0.126557	266750
1443	0	4408	14786			0.939875	0.100352	0.0943183	217857
1444	0	4488	14786			0.967598	0.0796019	0.0770227	191491
1445	0	4568	14786			0.991332	0.0915204	0.0907271	212274
1446	0	4648	14786			0.937865	0.0815451	0.0764783	195947
1447	0	4728	14786			0.977448	0.123841	0.121048	260699
1448	0	4808	14786			1.06076	0.133109	0.141197	304534
1449	0	4888	14786			1.1404	0.0796523	0.0908355	226578
1450	0	4968	14786			1.19668	0.0543416	0.0650293	148051
1451	0	5048	14786			0.934004	0.103763	0.0969152	201603
1452	0	5128	14786			1.06506	0.101993	0.108628	281408
1453	0	5208	14786			1.04149	0.132208	0.137694	301560
1454	0	5288	14786			1.16156	0.0866271	0.100623	161089
1455	0	5368	14786			1.00396	0.00117228	0.00117692	1766.85
1456	0	5448	14786			0.940852	0.0893793	0.0840927	145545
1457	0	5528	14786			1.03381	0.0943313	0.0975208	195703
1458	0	5608	14786			1.06358	0.18918	0.201208	367956
1459	0	5688	14786			0.954682	0.154464	0.147464	325802
1460	0	5768	14786			1.03834	0.177772	0.184587	382028
1461	0	5848	14786			0.716663	0.261049	0.187084	478008
1462	0	5928	14786			0.758032	0.181245	0.13739	433544
1463	0	6008	14786			0.951159	0.119861	0.114007	447220
1464	0	6088	14786			1.0627	0.104454	0.111003	516806
1465	0	6168	14786			0.941673	0.190057	0.178972	590396
1466	0	6248	14786			1.07583	0.228301	0.245612	579448
1467	0	6328	14786			0.876518	0.236197	0.207031	707384
1468	0	6408	14786			1.0107	0.104409	0.105527	456954
1469	0	6488	14786			1.02485	0.116426	0.119319	550407
1470	0	6568	14786			1.10637	0.112	0.123913	389014
1471	0	6648	14786			0.900448	0.17031	0.153355	386990
1472	0	6728	14786			0.855369	0.179742	0.153746	501543
1473	0	6808	14786			1.00225	0.173919	0.174311	521660
1474	0	6888	14786			0.954569	0.181537	0.173289	491349
1475	0	6968	14786			0.907592	0.157603	0.143039	493308
1476	0	7048	14786			0.851271	0.180919	0.154011	465912
1477	0	7128	14786			0.973608	0.110721	0.107798	320499
1478	0	7208	14786			1.02274	0.116081	0.118721	297863
1479	0	7288	14786			1.28074	0.0973587	0.124692	307278
1480	0	7368	14786			1.3062	0.08763	0.114462	277549
1481	0	7448	14786			1.15864	0.0867399	0.100501	267712
1482	0	7528	14786			1.40826	0.0535861	0.0754631	154479
1483	0	7608	14786			1.37974	0.0558512	0.07706	179683
1484	0	7688	14786			1.30939	0.0759943	0.0995061	226166
1485	0	7768	14786			1.45061	0.051962	0.0753767	175595
1486	0	7848	14786			1.63518	0.0811577	0.132707	259573
1487	0	7928	14786			1.82609	0.0365554	0.0667536	140432
1488	0	8008	14786			1.71843	0.0371206	0.063789	141641
1489	0	8088	14786			1.80177	0.0318486	0.0573838	139657
1490	0	8168	14786			1.7545	0.000474888	0.000833193	1766.85
1491	0	8248	14786			1.8862	0.000567312	0.00107006	1766.85
1492	0	8328	14786			1.26319	0.000913556	0.00115399	1766.85
1493	0	8408	14786			1.72979	0.000691384	0.00119595	1766.85
1494	0	8488	14786			1.64545	0.000726346	0.00119517	1766.85
1495	0	8568	14786			1.56891	0.000704767	0.00110572	1766.85
1496	0	8648	14786			1.62128	0.000895603	0.00145202	1766.85
1497	0	8728	14786			1.9841	0.0664399	0.131824	123458
1498	0	8808	14786			1.6948	0.0748395	0.126838	91476.1
1499	0	8888	14786			1.87888	0.0609555	0.114528	64118.7
1500	0	8968	14786			1.61269	0.00191928	0.00309521	1766.85
1501	0	9048	14786			1.24994	0.00522365	0.00652924	1766.85
1502	0	9128	14786			1.1228	0.0313916	0.0352464	1766.85
1503	0	808	14706			1.1267	0.00223345	0.00251642	1766.85
1504	0	888	14706			1.16029	0.00329408	0.00382208	1766.85
1505	0	968	14706			1.00221	0.00518191	0.00519334	1766.85
1506	0	1048	14706			1.1983	0.0465204	0.0557453	99159
1507	0	1128	14706			1.6002	0.0432174	0.0691564	159609
1508	0	1208	14706			1.40115	0.0397776	0.0557345	120297
1509	0	1288	14706			1.79944	0.000521362	0.00093816	1766.85
1510	0	1368	14706			1.09853	0.0925361	0.101654	182917
1511	0	1448	14706			1.48817	0.00117255	0.00174496	1766.85
1512	0	1528	14706			1.30441	0.00105017	0.00136985	1766.85
1513	0	1608	14706			1.01408	0.000917168	0.000930081	1766.85
1514	0	1688	14706			1.42786	0.0801472	0.114439	145422
1515	0	1768	14706			1.55468	0.0942534	0.146534	201191
1516	0	1848	14706			1.14276	0.10819	0.123636	218182
1517	0	1928	14706			1.33828	0.00104026	0.00139216	1766.85
1518	0	2008	14706			0.640143	0.225692	0.144475	26752.5
1519	0	2088	14706			0.577148	0.485945	0.280462	14689.8
1520	0	2168	14706			0.55601	0.288283	0.160288	289515
1521	0	2248	14706			0.670859	0.233127	0.156395	368140
1522	0	2328	14706			0.589021	0.314686	0.185357	275591
1523	0	2408	14706			0.433826	0.241862	0.104926	352568
1524	0	2488	14706			0.45666	0.26264	0.119937	294276
1525	0	2568	14706			0.343444	0.407968	0.140114	244373
1526	0	2648	14706			0.34251	0.387425	0.132697	341676
1527	0	2728	14706			0.306725	0.51028	0.156516	169773
1528	0	2808	14706			0.270277	1.29411	0.349768	8834.27
1529	0	2888	14706			0.514903	0.326599	0.168167	202529
1530	0	2968	14706			0.485755	0.446183	0.216735	572723
1531	0	3048	14706			0.479054	0.408941	0.195905	613037
1532	0	3128	14706			0.497594	0.431751	0.214836	590426
1533	0	3208	14706			0.467427	0.337833	0.157912	568491
1534	0	3288	14706			0.560097	0.302869	0.169636	616460
1535	0	3368	14706			0.597973	0.216185	0.129273	391245
1536	0	3448	14706			0.539813	0.29805	0.160892	394073
1537	0	3528	14706			0.503988	0.251893	0.126951	275230
1538	0	3608	14706			0.491866	0.241762	0.118914	210258
1539	0	3688	14706			0.551956	0.237368	0.131017	241643
1540	0	3768	14706			0.6863	0.184702	0.126761	271403
1541	0	3848	14706			0.792235	0.121303	0.0961003	186639
1542	0	3928	14706			0.954331	0.115303	0.110037	246035
1543	0	4008	14706			1.03638	0.087991	0.0911918	187893
1544	0	4088	14706			0.9057	0.0790719	0.0716155	182063
1545	0	4168	14706			0.872127	0.0885487	0.0772257	215526
1546	0	4248	14706			0.847934	0.000897563	0.000761074	1766.85
1547	0	4328	14706			1.00124	0.0953511	0.0954699	224185
1548	0	4408	14706			1.08462	0.0987537	0.10711	253994
1549	0	4488	14706			1.0244	0.0987575	0.101167	228360
1550	0	4568	14706			0.973243	0.132219	0.128682	313114
1551	0	4648	14706			1.0169	0.104394	0.106158	287273
1552	0	4728	14706			1.06602	0.0833986	0.0889048	245102
1553	0	4808	14706			1.09172	0.0626666	0.0684142	178946
1554	0	4888	14706			0.991913	0.0650982	0.0645718	196766
1555	0	4968	14706			1.12853	0.122353	0.138079	333069
1556	0	5048	14706			1.06813	0.0699651	0.0747317	216487
1557	0	5128	14706			0.975477	0.093265	0.0909778	265771
1558	0	5208	14706			1.19157	0.0743128	0.088549	192191
1559	0	5288	14706			1.44803	0.000754432	0.00109244	1766.85
1560	0	5368	14706			1.33812	0.00083948	0.00112333	1766.85
1561	0	5448	14706			1.1594	0.0778638	0.090275	234568
1562	0	5528	14706			0.931928	0.121076	0.112834	291506
1563	0	5608	14706			0.78488	0.12181	0.0956063	230903
1564	0	5688	14706			0.797989	0.170622	0.136154	351310
1565	0	5768	14706			0.903689	0.195586	0.176749	396375
1566	0	5848	14706			0.912259	0.179756	0.163984	378899
1567	0	5928	14706			0.871406	0.179338	0.156276	432389
1568	0	6008	14706			0.693615	0.204226	0.141654	364470
1569	0	6088	14706			0.976275	0.124301	0.121352	387348
1570	0	6168	14706			0.936115	0.122993	0.115135	449362
1571	0	6248	14706			1.05336	0.110571	0.116471	488269
1572	0	6328	14706			0.936147	0.120855	0.113138	418544
1573	0	6408	14706			0.945767	0.100321	0.0948804	462486
1574	0	6488	14706			1.05844	0.0907993	0.096106	306270
1575	0	6568	14706			1.07836	0.102718	0.110767	288811
1576	0	6648	14706			0.942756	0.118538	0.111753	278070
1577	0	6728	14706			0.878348	0.203811	0.179017	416761
1578	0	6808	14706			0.87932	0.16781	0.147558	368861
1579	0	6888	14706			0.805803	0.219109	0.176559	532397
1580	0	6968	14706			1.05291	0.148407	0.15626	387741
1581	0	7048	14706			0.828327	0.180001	0.1491	444303
1582	0	7128	14706			0.915039	0.200503	0.183468	564449
1583	0	7208	14706			0.844547	0.102739	0.0867676	222736
1584	0	7288	14706			1.06067	0.0984523	0.104425	246160
1585	0	7368	14706			1.0398	0.118403	0.123115	397769
1586	0	7448	14706			1.24342	0.0903081	0.112291	285167
1587	0	7528	14706			1.28641	0.104807	0.134826	379175
1588	0	7608	14706			1.5807	0.079014	0.124897	267493
1589	0	7688	14706			1.31097	0.000600032	0.000786625	1766.85
1590	0	7768	14706			1.71938	0.0599638	0.103101	226796
1591	0	7848	14706			1.56754	0.0466196	0.073078	170424
1592	0	7928	14706			1.61135	0.000443651	0.000714877	1766.85
1593	0	8008	14706			1.74578	0.0432532	0.0755106	144919
1594	0	8088	14706			1.70158	0.000568246	0.000966914	1766.85
1595	0	8168	14706			1.60819	0.0398555	0.0640952	148110
1596	0	8248	14706			1.81834	0.0510646	0.0928526	174321
1597	0	8328	14706			1.70434	0.0495353	0.0844249	176767
1598	0	8408	14706			1.83816	0.000547539	0.00100647	1766.85
1599	0	8488	14706			1.77088	0.000533304	0.000944416	1766.85
1600	0	8568	14706			1.73194	0.000644393	0.00111605	1766.85
1601	0	8648	14706			1.60821	0.000666532	0.00107192	1766.85
1602	0	8728	14706			1.44255	0.000919752	0.00132679	1766.85
1603	0	8808	14706			1.53015	0.0648185	0.0991818	96105.9
1604	0	8888	14706			1.61584	0.054854	0.0886355	53756.6
1605	0	8968	14706			1.44724	0.0617482	0.0893645	65065
1606	0	9048	14706			1.31187	0.00329067	0.00431692	1766.85
1607	0	9128	14706			1.77291	0.0050532	0.00895888	1766.85
1608	0	728	14626			0.00406	1.29411	0.00525408	1766.85
1609	0	808	14626			1.71381	0.000997149	0.00170893	1766.85
1610	0	888	14626			1.39331	0.002472	0.00344426	1766.85
1611	0	968	14626			0.768393	0.0951169	0.0730871	1766.85
1612	0	1048	14626			0.602527	0.0119387	0.00719336	1766.85
1613	0	1128	14626			0.888994	0.00506621	0.00450383	1766.85
1614	0	1208	14626			0.957459	0.0663589	0.0635359	92596.3
1615	0	1288	14626			1.32385	0.000794717	0.00105209	1766.85
1616	0	1368	14626			1.26853	0.0014373	0.00182325	1766.85
1617	0	1448	14626			1.49673	0.0856308	0.128166	159876
1618	0	1528	14626			1.3395	0.000874005	0.00117073	1766.85
1619	0	1608	14626			1.38894	0.0714415	0.0992278	141983
1620	0	1688	14626			1.77195	0.00102374	0.00181401	1766.85
1621	0	1768	14626			1.14562	0.168935	0.193536	212384
1622	0	1848	14626			0.987805	0.188482	0.186184	252444
1623	0	1928	14626			0.91309	0.224756	0.205223	312757
1624	0	2008	14626			0.65426	0.15326	0.100272	118567
1625	0	2088	14626			0.513712	0.399165	0.205056	275304
1626	0	2168	14626			0.660018	0.169545	0.111903	200207
1627	0	2248	14626			0.802286	0.268102	0.215095	325996
1628	0	2328	14626			0.507045	0.223211	0.113178	260600
1629	0	2408	14626			0.384106	0.345197	0.132592	297336
1630	0	2488	14626			0.448684	0.324743	0.145707	400078
1631	0	2568	14626			0.397736	0.414683	0.164935	388612
1632	0	2648	14626			0.351998	0.42216	0.148599	392803
1633	0	2728	14626			0.359435	0.437038	0.157087	156424
1634	0	2808	14626			0.421156	0.487584	0.205349	215637
1635	0	2888	14626			0.388337	0.567261	0.220288	522574
1636	0	2968	14626			0.487466	0.389484	0.18986	339808
1637	0	3048	14626			0.436154	0.319908	0.139529	332989
1638	0	3128	14626			0.544171	0.282449	0.1537	434130
1639	0	3208	14626			0.565164	0.347948	0.196648	777051
1640	0	3288	14626			0.627267	0.247997	0.15556	527312
1641	0	3368	14626			0.531198	0.313038	0.166285	754517
1642	0	3448	14626			0.515162	0.306303	0.157796	562605
1643	0	3528	14626			0.603954	0.226877	0.137024	467765
1644	0	3608	14626			0.549798	0.244965	0.134681	416174
1645	0	3688	14626			0.7715	0.167617	0.129317	260528
1646	0	3768	14626			1.02953	0.0711928	0.0732949	140055
1647	0	3848	14626			0.973974	0.103415	0.100723	182468
1648	0	3928	14626			0.876906	0.144482	0.126697	212200
1649	0	4008	14626			0.913507	0.0980645	0.0895826	164071
1650	0	4088	14626			1.02977	0.109848	0.113118	190365
1651	0	4168	14626			1.10319	0.0925574	0.102108	217021
1652	0	4248	14626			0.843658	0.0668006	0.0563569	150073
1653	0	4328	14626			1.09822	0.0895487	0.0983442	237009
1654	0	4408	14626			0.99098	0.118475	0.117406	317346
1655	0	4488	14626			0.994892	0.0780722	0.0776734	219691
1656	0	4568	14626			1.09511	0.0702827	0.0769673	225608
1657	0	4648	14626			0.958106	0.135048	0.12939	401643
1658	0	4728	14626			0.899385	0.131251	0.118046	418758
1659	0	4808	14626			1.10013	0.113693	0.125076	408942
1660	0	4888	14626			1.04681	0.0769809	0.0805847	235154
1661	0	4968	14626			1.06574	0.112258	0.119638	353078
1662	0	5048	14626			1.00552	0.112724	0.113346	384194
1663	0	5128	14626			1.04195	0.0629908	0.0656336	188735
1664	0	5208	14626			1.09898	0.111008	0.121995	312042
1665	0	5288	14626			1.14208	0.000708598	0.000809276	1766.85
1666	0	5368	14626			1.00694	0.0927549	0.093399	208245
1667	0	5448	14626			0.87786	0.156308	0.137216	368388
1668	0	5528	14626			0.995257	0.130264	0.129646	279269
1669	0	5608	14626			0.823262	0.195507	0.160954	397990
1670	0	5688	14626			0.757518	0.234574	0.177694	545579
1671	0	5768	14626			0.729864	0.332399	0.242606	667161
1672	0	5848	14626			0.796706	0.278155	0.221608	546702
1673	0	5928	14626			0.825178	0.154915	0.127833	305044
1674	0	6008	14626			0.82997	0.181739	0.150838	426298
1675	0	6088	14626			1.01002	0.155824	0.157386	391693
1676	0	6168	14626			0.882994	0.138567	0.122354	546512
1677	0	6248	14626			0.728306	0.162875	0.118623	578089
1678	0	6328	14626			0.960894	0.135874	0.130561	379818
1679	0	6408	14626			0.908906	0.120411	0.109442	401658
1680	0	6488	14626			0.800857	0.0922956	0.0739156	225389
1681	0	6568	14626			1.11816	0.101236	0.113198	250822
1682	0	6648	14626			0.862826	0.0921583	0.0795166	172502
1683	0	6728	14626			0.828791	0.106903	0.0886	229078
1684	0	6808	14626			0.963795	0.152936	0.147399	290563
1685	0	6888	14626			0.915117	0.109591	0.100288	196490
1686	0	6968	14626			0.925437	0.0888325	0.0822088	188958
1687	0	7048	14626			0.95647	0.168604	0.161265	298508
1688	0	7128	14626			1.03082	0.108555	0.111901	234454
1689	0	7208	14626			1.45564	0.118022	0.171797	289494
1690	0	7288	14626			1.29034	0.000827407	0.00106764	1766.85
1691	0	7368	14626			1.27524	0.0806935	0.102903	196301
1692	0	7448	14626			1.23063	0.13595	0.167303	383550
1693	0	7528	14626			1.33	0.0867073	0.11532	279645
1694	0	7608	14626			1.01178	0.122756	0.124202	237156
1695	0	7688	14626			1.38243	0.0530932	0.0733975	167681
1696	0	7768	14626			1.3344	0.0977776	0.130474	280915
1697	0	7848	14626			1.46335	0.0505935	0.0740363	151731
1698	0	7928	14626			1.44552	0.0706719	0.102157	279140
1699	0	8008	14626			1.31205	0.0425099	0.0557753	139410
1700	0	8088	14626			1.53307	0.043251	0.0663068	138570
1701	0	8168	14626			1.73626	0.0453723	0.0787781	153117
1702	0	8248	14626			1.70123	0.000491932	0.000836891	1766.85
1703	0	8328	14626			2.02965	0.0355858	0.0722267	132494
1704	0	8408	14626			1.74327	0.0393865	0.0686612	153870
1705	0	8488	14626			2.07756	0.0418749	0.0869977	171481
1706	0	8568	14626			1.52465	0.0596394	0.0909294	186183
1707	0	8648	14626			1.58327	0.000701337	0.00111041	1766.85
1708	0	8728	14626			1.97691	0.000713518	0.00141056	1766.85
1709	0	8808	14626			1.52242	0.000892637	0.00135897	1766.85
1710	0	8888	14626			2.18754	0.00113164	0.0024755	1766.85
1711	0	8968	14626			1.6397	0.0881349	0.144515	99802.6
1712	0	9048	14626			1.61985	0.0581719	0.09423	88853.1
1713	0	9128	14626			1.48032	0.00152843	0.00226258	1766.85
1714	0	728	14546			1.37793	0.00105895	0.00145916	1766.85
1715	0	808	14546			1.72341	0.000854956	0.00147344	1766.85
1716	0	888	14546			1.33216	0.0519026	0.0691426	115238
1717	0	968	14546			1.01194	0.0523517	0.052977	57909
1718	0	1048	14546			0.967406	0.062467	0.0604309	35494.2
1719	0	1128	14546			0.891987	0.00377662	0.00336869	1766.85
1720	0	1208	14546			1.0423	0.00254925	0.00265708	1766.85
1721	0	1288	14546			1.25924	0.0788751	0.0993228	140991
1722	0	1368	14546			1.19396	0.0821213	0.09805	153822
1723	0	1448	14546			1.31297	0.00110276	0.00144788	1766.85
1724	0	1528	14546			1.51803	0.00111951	0.00169946	1766.85
1725	0	1608	14546			0.896536	0.00148141	0.00132814	1766.85
1726	0	1688	14546			1.27968	0.00126344	0.0016168	1766.85
1727	0	1768	14546			0.982957	0.152223	0.149629	189567
1728	0	1848	14546			0.773972	0.173142	0.134007	192513
1729	0	1928	14546			0.833132	0.208723	0.173893	334943
1730	0	2008	14546			0.704273	0.267925	0.188693	375465
1731	0	2088	14546			0.834159	0.128858	0.107488	173386
1732	0	2168	14546			0.730101	0.154783	0.113008	247006
1733	0	2248	14546			0.504663	0.433301	0.218671	347834
1734	0	2328	14546			0.423804	0.316048	0.133942	369098
1735	0	2408	14546			0.472431	0.31194	0.14737	345995
1736	0	2488	14546			0.43362	0.528131	0.229008	405250
1737	0	2568	14546			0.327286	0.425016	0.139102	235582
1738	0	2648	14546			0.37283	0.433344	0.161564	430603
1739	0	2728	14546			0.317978	0.655541	0.208448	255962
1740	0	2808	14546			0.491533	0.388036	0.190733	378814
1741	0	2888	14546			0.51019	0.406638	0.207463	383054
1742	0	2968	14546			0.590647	0.249648	0.147454	225167
1743	0	3048	14546			0.636639	0.239983	0.152783	263497
1744	0	3128	14546			0.628342	0.261604	0.164377	478950
1745	0	3208	14546			0.597598	0.28675	0.171361	573162
1746	0	3288	14546			0.630906	0.234515	0.147957	529617
1747	0	3368	14546			0.531952	0.248849	0.132376	535390
1748	0	3448	14546			0.543184	0.206833	0.112348	455249
1749	0	3528	14546			0.679772	0.177938	0.120957	515597
1750	0	3608	14546			0.721054	0.187915	0.135497	512127
1751	0	3688	14546			0.613897	0.197754	0.1214	430965
1752	0	3768	14546			0.696431	0.177753	0.123793	301092
1753	0	3848	14546			0.820388	0.17571	0.14415	263364
1754	0	3928	14546			0.873326	0.105045	0.0917382	165748
1755	0	4008	14546			0.94776	0.137519	0.130335	188827
1756	0	4088	14546			1.00192	0.109721	0.109932	186303
1757	0	4168	14546			1.03073	0.0720014	0.0742137	138211
1758	0	4248	14546			1.15502	0.0804724	0.0929469	158667
1759	0	4328	14546			1.0494	0.121062	0.127043	222620
1760	0	4408	14546			1.14078	0.0872019	0.0994778	226716
1761	0	4488	14546			0.934354	0.0862373	0.0805762	224408
1762	0	4568	14546			1.00033	0.106435	0.106471	306432
1763	0	4648	14546			1.11357	0.0869493	0.0968242	259985
1764	0	4728	14546			1.14916	0.0870039	0.0999818	289798
1765	0	4808	14546			1.07101	0.0664882	0.0712095	272073
1766	0	4888	14546			1.07128	0.11237	0.120379	423699
1767	0	4968	14546			1.14308	0.0776762	0.0887899	305737
1768	0	5048	14546			1.02192	0.0730965	0.0746987	249718
1769	0	5128	14546			1.14358	0.104202	0.119163	335372
1770	0	5208	14546			0.996481	0.110458	0.110069	299905
1771	0	5288	14546			1.12675	0.0753631	0.084915	242918
1772	0	5368	14546			1.05906	0.10545	0.111678	346600
1773	0	5448	14546			0.968851	0.0832213	0.0806291	204712
1774	0	5528	14546			1.03933	0.132201	0.1374	261093
1775	0	5608	14546			0.892788	0.153704	0.137225	355311
1776	0	5688	14546			0.867831	0.230801	0.200296	575458
1777	0	5768	14546			0.876036	0.170763	0.149595	400236
1778	0	5848	14546			1.08173	0.162134	0.175384	309127
1779	0	5928	14546			0.77872	0.21165	0.164816	400882
1780	0	6008	14546			0.735983	0.189586	0.139532	402237
1781	0	6088	14546			0.915509	0.142423	0.130389	340032
1782	0	6168	14546			0.721322	0.203153	0.146538	570729
1783	0	6248	14546			0.758652	0.152115	0.115402	611803
1784	0	6328	14546			0.91018	0.181034	0.164773	674556
1785	0	6408	14546			1.01299	0.117569	0.119096	384570
1786	0	6488	14546			0.985187	0.107197	0.105609	309111
1787	0	6568	14546			1.14807	0.0875424	0.100505	219970
1788	0	6648	14546			0.97953	0.141341	0.138447	293852
1789	0	6728	14546			0.936246	0.060872	0.0569912	128070
1790	0	6808	14546			0.987174	0.100907	0.0996126	167011
1791	0	6888	14546			0.740288	0.124661	0.0922851	172466
1792	0	6968	14546			1.09181	0.106909	0.116724	189217
1793	0	7048	14546			0.973801	0.091889	0.0894816	160536
1794	0	7128	14546			0.954708	0.160289	0.153029	335692
1795	0	7208	14546			1.13959	0.069317	0.078993	197875
1796	0	7288	14546			1.1399	0.0631373	0.07197	152647
1797	0	7368	14546			1.38918	0.000893425	0.00124113	1766.85
1798	0	7448	14546			1.06459	0.00100911	0.00107429	1766.85
1799	0	7528	14546			1.03395	0.14823	0.153262	274707
1800	0	7608	14546			1.07565	0.112709	0.121236	212832
1801	0	7688	14546			1.46616	0.069541	0.101958	174630
1802	0	7768	14546			1.39142	0.0656444	0.0913387	184126
1803	0	7848	14546			1.38245	0.0517209	0.0715016	177457
1804	0	7928	14546			1.39084	0.0967288	0.134534	293433
1805	0	8008	14546			1.26937	0.0749659	0.0951598	230824
1806	0	8088	14546			1.57122	0.0751331	0.118051	225918
1807	0	8168	14546			1.70691	0.0419052	0.0715283	152578
1808	0	8248	14546			2.15544	0.00050206	0.00108216	1766.85
1809	0	8328	14546			1.76754	0.043187	0.0763348	154378
1810	0	8408	14546			1.97968	0.000423486	0.000838368	1766.85
1811	0	8488	14546			2.03193	0.000475993	0.000967184	1766.85
1812	0	8568	14546			1.98135	0.0389727	0.0772185	153511
1813	0	8648	14546			1.9808	0.037759	0.074793	131627
1814	0	8728	14546			2.22442	0.000632186	0.00140625	1766.85
1815	0	8808	14546			2.41133	0.000751542	0.00181222	1766.85
1816	0	8888	14546			1.74899	0.000894138	0.00156384	1766.85
1817	0	8968	14546			1.54157	0.00147032	0.00226659	1766.85
1818	0	9048	14546			1.36034	0.0020799	0.00282938	1766.85
1819	0	9128	14546			1.53672	0.002489	0.00382488	1766.85
1820	0	9208	14546			1.18822	0.0223306	0.0265337	1766.85
1821	0	648	14466			0.817869	0.00447322	0.00365851	1766.85
1822	0	728	14466			1.01501	0.00182652	0.00185394	1766.85
1823	0	808	14466			1.02157	0.0014054	0.00143571	1766.85
1824	0	888	14466			1.29819	0.000643446	0.000835312	1766.85
1825	0	968	14466			1.07122	0.000670172	0.0007179	1766.85
1826	0	1048	14466			1.14872	0.0462291	0.0531044	87990.6
1827	0	1128	14466			1.11444	0.0596854	0.0665156	93002.5
1828	0	1208	14466			1.2348	0.0620743	0.0766494	117028
1829	0	1288	14466			1.09298	0.091863	0.100404	153667
1830	0	1368	14466			1.32234	0.00115476	0.00152699	1766.85
1831	0	1448	14466			1.09328	0.00153673	0.00168008	1766.85
1832	0	1528	14466			1.20551	0.00164741	0.00198597	1766.85
1833	0	1608	14466			1.10806	0.00137115	0.00151931	1766.85
1834	0	1688	14466			1.32353	0.00112893	0.00149417	1766.85
1835	0	1768	14466			0.993405	0.00154556	0.00153537	1766.85
1836	0	1848	14466			1.0335	0.00142658	0.00147436	1766.85
1837	0	1928	14466			0.79796	0.247432	0.197441	350759
1838	0	2008	14466			0.802316	0.229139	0.183842	263714
1839	0	2088	14466			0.752735	0.210315	0.158312	303982
1840	0	2168	14466			0.582216	0.351714	0.204774	503440
1841	0	2248	14466			0.543993	0.329974	0.179504	305644
1842	0	2328	14466			0.509416	0.281753	0.143529	291086
1843	0	2408	14466			0.409895	0.493484	0.202277	334712
1844	0	2488	14466			0.32978	0.765158	0.252334	466303
1845	0	2568	14466			0.315413	0.675435	0.213041	426156
1846	0	2648	14466			0.325278	0.505465	0.164417	326719
1847	0	2728	14466			0.410866	0.580448	0.238486	531458
1848	0	2808	14466			0.491753	0.397225	0.195337	402396
1849	0	2888	14466			0.477031	0.448269	0.213838	509460
1850	0	2968	14466			0.599105	0.290519	0.174051	335705
1851	0	3048	14466			0.67093	0.267751	0.179642	449111
1852	0	3128	14466			0.549912	0.280022	0.153987	466833
1853	0	3208	14466			0.546869	0.279099	0.152631	418910
1854	0	3288	14466			0.640338	0.233434	0.149477	426923
1855	0	3368	14466			0.639403	0.2722	0.174045	508140
1856	0	3448	14466			0.768386	0.248009	0.190567	511797
1857	0	3528	14466			0.720791	0.144414	0.104092	311578
1858	0	3608	14466			0.670607	0.192541	0.129119	402250
1859	0	3688	14466			0.799242	0.163473	0.130654	361188
1860	0	3768	14466			0.841702	0.139638	0.117534	288261
1861	0	3848	14466			0.910486	0.0987967	0.089953	223498
1862	0	3928	14466			0.820344	0.134936	0.110694	277673
1863	0	4008	14466			1.02198	0.12146	0.12413	247924
1864	0	4088	14466			0.937675	0.000949009	0.000889862	1766.85
1865	0	4168	14466			1.11242	0.150215	0.167101	238010
1866	0	4248	14466			0.945399	0.103526	0.097873	138478
1867	0	4328	14466			0.963464	0.106123	0.102245	228796
1868	0	4408	14466			1.15406	0.0749168	0.0864589	203882
1869	0	4488	14466			1.02129	0.103762	0.105972	335745
1870	0	4568	14466			1.11251	0.0857566	0.0954055	273058
1871	0	4648	14466			1.17443	0.0690214	0.0810608	229563
1872	0	4728	14466			1.17731	0.108763	0.128048	402994
1873	0	4808	14466			1.18599	0.0921475	0.109286	492661
1874	0	4888	14466			1.24479	0.0844349	0.105104	356663
1875	0	4968	14466			1.08423	0.100903	0.109402	547732
1876	0	5048	14466			1.08377	0.0910641	0.0986921	321403
1877	0	5128	14466			1.05024	0.0798313	0.0838419	267556
1878	0	5208	14466			0.993202	0.119596	0.118783	385996
1879	0	5288	14466			1.04118	0.0787143	0.0819558	291055
1880	0	5368	14466			1.09061	0.0791648	0.0863378	283178
1881	0	5448	14466			1.03588	0.113427	0.117497	343858
1882	0	5528	14466			1.01815	0.063864	0.0650233	160420
1883	0	5608	14466			0.974955	0.108108	0.105401	300090
1884	0	5688	14466			0.822332	0.192635	0.15841	378134
1885	0	5768	14466			0.68731	0.320044	0.219969	512163
1886	0	5848	14466			0.741302	0.148109	0.109793	371342
1887	0	5928	14466			0.841715	0.17261	0.145288	404715
1888	0	6008	14466			0.862044	0.191149	0.164779	493544
1889	0	6088	14466			0.861385	0.149112	0.128442	403128
1890	0	6168	14466			0.730795	0.199154	0.145541	455038
1891	0	6248	14466			0.737175	0.192453	0.141872	532425
1892	0	6328	14466			0.778709	0.163866	0.127604	429473
1893	0	6408	14466			0.96952	0.100271	0.0972149	404821
1894	0	6488	14466			1.05468	0.0934838	0.0985956	236258
1895	0	6568	14466			0.972909	0.122072	0.118765	229067
1896	0	6648	14466			0.753744	0.00100886	0.000760422	1766.85
1897	0	6728	14466			0.877092	0.113919	0.099917	207016
1898	0	6808	14466			0.90586	0.193147	0.174964	419394
1899	0	6888	14466			0.880166	0.141018	0.124119	256364
1900	0	6968	14466			1.01235	0.000845788	0.00085623	1766.85
1901	0	7048	14466			0.964887	0.123517	0.11918	240509
1902	0	7128	14466			0.901573	0.00135948	0.00122567	1766.85
1903	0	7208	14466			0.844874	0.214178	0.180954	604526
1904	0	7288	14466			0.740966	0.210127	0.155697	525005
1905	0	7368	14466			1.09309	0.107328	0.11732	223069
1906	0	7448	14466			1.22136	0.112318	0.137181	198958
1907	0	7528	14466			1.41263	0.00101061	0.00142762	1766.85
1908	0	7608	14466			1.02981	0.19962	0.20557	309441
1909	0	7688	14466			1.57597	0.000864936	0.00136311	1766.85
1910	0	7768	14466			1.38677	0.0625639	0.0867617	166757
1911	0	7848	14466			1.41905	0.000575715	0.000816969	1766.85
1912	0	7928	14466			1.64247	0.0419145	0.0688435	139721
1913	0	8008	14466			1.70253	0.000549468	0.000935484	1766.85
1914	0	8088	14466			1.28003	0.000631666	0.000808549	1766.85
1915	0	8168	14466			1.82864	0.000506779	0.000926719	1766.85
1916	0	8248	14466			1.688	0.000469455	0.000792442	1766.85
1917	0	8328	14466			1.73674	0.00045241	0.000785719	1766.85
1918	0	8408	14466			2.01201	0.0359486	0.0723291	153910
1919	0	8488	14466			1.84021	0.0339303	0.0624387	132667
1920	0	8568	14466			1.77129	0.0413771	0.0732908	188052
1921	0	8648	14466			1.59569	0.000440354	0.000702666	1766.85
1922	0	8728	14466			1.60119	0.000610531	0.000977572	1766.85
1923	0	8808	14466			1.81675	0.000681597	0.00123829	1766.85
1924	0	8888	14466			1.78951	0.000891006	0.00159446	1766.85
1925	0	8968	14466			1.54899	0.00107505	0.00166524	1766.85
1926	0	9048	14466			1.81963	0.0606187	0.110304	73840.9
1927	0	9128	14466			1.46564	0.153969	0.225663	124093
1928	0	9208	14466			1.24884	0.0017448	0.00217898	1766.85
1929	0	568	14386			180.558	0.00414796	0.748947	1766.85
1930	0	648	14386			1.51992	0.00165978	0.00252273	1766.85
1931	0	728	14386			1.242	0.00163885	0.00203545	1766.85
1932	0	808	14386			1.12898	0.00137762	0.00155531	1766.85
1933	0	888	14386			1.4396	0.000516536	0.000743605	1766.85
1934	0	968	14386			1.0662	0.0712102	0.0759241	168210
1935	0	1048	14386			0.841279	0.101473	0.0853672	73477.3
1936	0	1128	14386			0.764212	0.0834873	0.063802	54355.1
1937	0	1208	14386			0.779416	0.071118	0.0554306	70737.7
1938	0	1288	14386			1.2046	0.0723132	0.0871082	162278
1939	0	1368	14386			1.32325	0.000848007	0.00112212	1766.85
1940	0	1448	14386			1.27512	0.00104912	0.00133776	1766.85
1941	0	1528	14386			0.942283	0.00334767	0.00315446	1766.85
1942	0	1608	14386			1.30881	0.12147	0.158981	192207
1943	0	1688	14386			1.0145	0.00142444	0.00144509	1766.85
1944	0	1768	14386			0.812718	0.00198285	0.0016115	1766.85
1945	0	1848	14386			1.38505	0.116294	0.161073	177253
1946	0	1928	14386			0.854185	0.279943	0.239123	375306
1947	0	2008	14386			1.08926	0.127919	0.139338	166168
1948	0	2088	14386			0.882183	0.137799	0.121564	168904
1949	0	2168	14386			0.600859	0.288293	0.173223	410119
1950	0	2248	14386			0.393922	0.372458	0.146719	240140
1951	0	2328	14386			0.508777	0.393088	0.199994	292001
1952	0	2408	14386			0.236194	0.927324	0.219028	332092
1953	0	2488	14386			0.343249	0.594925	0.204208	344507
1954	0	2568	14386			0.367326	0.672927	0.247183	476515
1955	0	2648	14386			0.476435	0.421572	0.200851	478071
1956	0	2728	14386			0.520939	0.413955	0.215645	576741
1957	0	2808	14386			0.485289	0.326951	0.158666	422842
1958	0	2888	14386			0.490891	0.369165	0.18122	430806
1959	0	2968	14386			0.552482	0.264253	0.145995	356516
1960	0	3048	14386			0.646875	0.184737	0.119502	299296
1961	0	3128	14386			0.768457	0.239536	0.184073	509817
1962	0	3208	14386			0.57019	0.296106	0.168837	512804
1963	0	3288	14386			0.757907	0.354036	0.268326	633744
1964	0	3368	14386			0.755544	0.147295	0.111288	272225
1965	0	3448	14386			0.717344	0.14993	0.107552	324163
1966	0	3528	14386			0.708436	0.181008	0.128233	327566
1967	0	3608	14386			0.764253	0.166188	0.12701	297640
1968	0	3688	14386			0.809212	0.15945	0.129029	294594
1969	0	3768	14386			0.89845	0.137932	0.123925	284932
1970	0	3848	14386			0.862274	0.121529	0.104791	280101
1971	0	3928	14386			0.945253	0.142906	0.135082	247895
1972	0	4008	14386			0.969848	0.114271	0.110826	168206
1973	0	4088	14386			1.1613	0.0880293	0.102228	195585
1974	0	4168	14386			1.10465	0.0793579	0.0876627	169060
1975	0	4248	14386			1.20161	0.097464	0.117113	179932
1976	0	4328	14386			1.11617	0.0828028	0.0924217	200777
1977	0	4408	14386			1.08338	0.0620026	0.0671724	163085
1978	0	4488	14386			0.913888	0.115616	0.10566	297724
1979	0	4568	14386			1.08165	0.0779052	0.0842661	228322
1980	0	4648	14386			1.09284	0.0697206	0.0761932	227442
1981	0	4728	14386			1.03253	0.109604	0.113169	340045
1982	0	4808	14386			1.10832	0.0661963	0.0733669	218471
1983	0	4888	14386			1.14261	0.111798	0.127742	453803
1984	0	4968	14386			1.06397	0.0984538	0.104751	381001
1985	0	5048	14386			0.986707	0.0926804	0.0914485	320425
1986	0	5128	14386			0.987195	0.0803626	0.0793335	250716
1987	0	5208	14386			1.21522	0.0857953	0.10426	307918
1988	0	5288	14386			1.05264	0.108746	0.114471	403040
1989	0	5368	14386			1.12231	0.0869547	0.0975897	319212
1990	0	5448	14386			0.968405	0.096854	0.0937939	291284
1991	0	5528	14386			1.09927	0.0848316	0.093253	268446
1992	0	5608	14386			0.948878	0.110108	0.104479	310675
1993	0	5688	14386			1.09183	0.0934441	0.102025	284264
1994	0	5768	14386			0.812347	0.127326	0.103433	283797
1995	0	5848	14386			0.975136	0.154601	0.150757	370009
1996	0	5928	14386			0.752271	0.212339	0.159736	334062
1997	0	6008	14386			0.712381	0.174197	0.124095	360939
1998	0	6088	14386			0.739056	0.18277	0.135077	548013
[truncated: 50,088 more rows]
