# Supplementary material for: Untargeted pixel-by-pixel metabolite ratio imaging as a novel tool for biomedical discovery in mass spectrometry imaging
Source: eLife. 2025 Mar 18;13:RP96892. doi: 10.7554/eLife.96892 (PMC11919253; doi:10.7554/eLife.96892)
Supplement: Figure 8—figure supplement 3—source data 1. [file elife-96892-fig8-figsupp3-data1.xlsx]

## Sheet: Figure S7A
spotId	raster	x	y	z	Date	N-Acetylaspartate/Aspartate
516	Regions/clus1	4088	15586	0		8.42081
534	Regions/clus1	5528	15586	0		8.18123
594	Regions/clus1	3848	15506	0		14.3998
595	Regions/clus1	3928	15506	0		18.7105
596	Regions/clus1	4008	15506	0		7.90116
597	Regions/clus1	4088	15506	0		7.94523
598	Regions/clus1	4168	15506	0		7.6881
615	Regions/clus1	5528	15506	0		7.79067
616	Regions/clus1	5608	15506	0		6.67842
675	Regions/clus1	3608	15426	0		8.3789
676	Regions/clus1	3688	15426	0		8.06168
677	Regions/clus1	3768	15426	0		9.33918
678	Regions/clus1	3848	15426	0		8.55509
682	Regions/clus1	4168	15426	0		6.81439
698	Regions/clus1	5448	15426	0		8.85263
699	Regions/clus1	5528	15426	0		7.8191
755	Regions/clus1	3048	15346	0		8.2306
756	Regions/clus1	3128	15346	0		8.0856
757	Regions/clus1	3208	15346	0		10.3317
770	Regions/clus1	4248	15346	0		8.45872
784	Regions/clus1	5368	15346	0		8.84359
789	Regions/clus1	5768	15346	0		8.80755
790	Regions/clus1	5848	15346	0		8.20788
792	Regions/clus1	6008	15346	0		9.58171
840	Regions/clus1	2728	15266	0		9.51295
841	Regions/clus1	2808	15266	0		10.7371
842	Regions/clus1	2888	15266	0		9.22715
871	Regions/clus1	5208	15266	0		6.80124
872	Regions/clus1	5288	15266	0		9.00834
879	Regions/clus1	5848	15266	0		10.2223
880	Regions/clus1	5928	15266	0		9.10303
881	Regions/clus1	6008	15266	0		10.3459
882	Regions/clus1	6088	15266	0		11.2506
929	Regions/clus1	2568	15186	0		8.27156
930	Regions/clus1	2648	15186	0		9.65218
943	Regions/clus1	3688	15186	0		9.05785
946	Regions/clus1	3928	15186	0		10.3538
953	Regions/clus1	4488	15186	0		14.2282
974	Regions/clus1	6168	15186	0		10.4854
975	Regions/clus1	6248	15186	0		9.09725
976	Regions/clus1	6328	15186	0		9.4732
977	Regions/clus1	6408	15186	0		10.8171
1020	Regions/clus1	2408	15106	0		10.5203
1021	Regions/clus1	2488	15106	0		9.68894
1028	Regions/clus1	3048	15106	0		13.2384
1032	Regions/clus1	3368	15106	0		22.48
1033	Regions/clus1	3448	15106	0		17.4893
1041	Regions/clus1	4088	15106	0		11.5737
1070	Regions/clus1	6408	15106	0		9.96184
1071	Regions/clus1	6488	15106	0		11.5217
1072	Regions/clus1	6568	15106	0		11.7481
1113	Regions/clus1	2168	15026	0		8.43871
1114	Regions/clus1	2248	15026	0		8.14237
1115	Regions/clus1	2328	15026	0		9.33952
1121	Regions/clus1	2808	15026	0		24.7278
1123	Regions/clus1	2968	15026	0		12.6269
1134	Regions/clus1	3848	15026	0		26.4498
1139	Regions/clus1	4248	15026	0		29.9601
1140	Regions/clus1	4328	15026	0		10.7772
1169	Regions/clus1	6648	15026	0		10.0056
1170	Regions/clus1	6728	15026	0		9.15744
1210	Regions/clus1	2008	14946	0		10.344
1211	Regions/clus1	2088	14946	0		8.29616
1212	Regions/clus1	2168	14946	0		8.3113
1219	Regions/clus1	2728	14946	0		22.6701
1220	Regions/clus1	2808	14946	0		20.5145
1224	Regions/clus1	3128	14946	0		9.17625
1233	Regions/clus1	3848	14946	0		27.2456
1249	Regions/clus1	5128	14946	0		7.25258
1252	Regions/clus1	5368	14946	0		6.37202
1254	Regions/clus1	5528	14946	0		6.97311
1258	Regions/clus1	5848	14946	0		10.2063
1259	Regions/clus1	5928	14946	0		12.2775
1260	Regions/clus1	6008	14946	0		12.8031
1261	Regions/clus1	6088	14946	0		15.8414
1262	Regions/clus1	6168	14946	0		16.2581
1271	Regions/clus1	6888	14946	0		9.10218
1272	Regions/clus1	6968	14946	0		7.60828
1273	Regions/clus1	7048	14946	0		8.16421
1274	Regions/clus1	7128	14946	0		8.24169
1309	Regions/clus1	1928	14866	0		5.96408
1310	Regions/clus1	2008	14866	0		6.84336
1311	Regions/clus1	2088	14866	0		6.73747
1317	Regions/clus1	2568	14866	0		30.3056
1318	Regions/clus1	2648	14866	0		32.5523
1319	Regions/clus1	2728	14866	0		28.9144
1320	Regions/clus1	2808	14866	0		22.7178
1323	Regions/clus1	3048	14866	0		16.1608
1344	Regions/clus1	4728	14866	0		7.80518
1346	Regions/clus1	4888	14866	0		8.76447
1351	Regions/clus1	5288	14866	0		7.0153
1355	Regions/clus1	5608	14866	0		9.69264
1359	Regions/clus1	5928	14866	0		11.8988
1360	Regions/clus1	6008	14866	0		16.1437
1362	Regions/clus1	6168	14866	0		20.3174
1363	Regions/clus1	6248	14866	0		17.8665
1364	Regions/clus1	6328	14866	0		12.8673
1373	Regions/clus1	7048	14866	0		11.4894
1374	Regions/clus1	7128	14866	0		10.6031
1375	Regions/clus1	7208	14866	0		9.42982
1411	Regions/clus1	1848	14786	0		6.5375
1412	Regions/clus1	1928	14786	0		8.91913
1413	Regions/clus1	2008	14786	0		11.7922
1419	Regions/clus1	2488	14786	0		23.9914
1420	Regions/clus1	2568	14786	0		23.0992
1421	Regions/clus1	2648	14786	0		29.338
1422	Regions/clus1	2728	14786	0		28.4652
1426	Regions/clus1	3048	14786	0		16.4844
1427	Regions/clus1	3128	14786	0		13.1836
1458	Regions/clus1	5608	14786	0		8.65301
1464	Regions/clus1	6088	14786	0		11.6877
1465	Regions/clus1	6168	14786	0		14.7858
1467	Regions/clus1	6328	14786	0		12.5824
1468	Regions/clus1	6408	14786	0		12.3989
1469	Regions/clus1	6488	14786	0		12.0463
1478	Regions/clus1	7208	14786	0		10.7309
1479	Regions/clus1	7288	14786	0		9.26641
1480	Regions/clus1	7368	14786	0		9.51426
1515	Regions/clus1	1768	14706	0		7.11796
1516	Regions/clus1	1848	14706	0		7.5734
1517	Regions/clus1	1928	14706	0		6.11781
1525	Regions/clus1	2568	14706	0		34.8132
1532	Regions/clus1	3128	14706	0		17.5979
1533	Regions/clus1	3208	14706	0		17.9813
1535	Regions/clus1	3368	14706	0		13.0898
1561	Regions/clus1	5448	14706	0		6.83923
1562	Regions/clus1	5528	14706	0		8.0546
1569	Regions/clus1	6088	14706	0		9.80464
1570	Regions/clus1	6168	14706	0		10.8184
1571	Regions/clus1	6248	14706	0		12.072
1572	Regions/clus1	6328	14706	0		14.1833
1574	Regions/clus1	6488	14706	0		9.75286
1576	Regions/clus1	6648	14706	0		9.84532
1585	Regions/clus1	7368	14706	0		10.8304
1586	Regions/clus1	7448	14706	0		9.26939
1587	Regions/clus1	7528	14706	0		9.84929
1620	Regions/clus1	1688	14626	0		6.44802
1621	Regions/clus1	1768	14626	0		8.41131
1639	Regions/clus1	3208	14626	0		17.086
1640	Regions/clus1	3288	14626	0		14.4757
1641	Regions/clus1	3368	14626	0		21.3117
1667	Regions/clus1	5448	14626	0		9.24478
1676	Regions/clus1	6168	14626	0		11.2162
1677	Regions/clus1	6248	14626	0		12.7223
1679	Regions/clus1	6408	14626	0		11.5008
1680	Regions/clus1	6488	14626	0		10.0397
1681	Regions/clus1	6568	14626	0		7.34342
1683	Regions/clus1	6728	14626	0		8.80035
1686	Regions/clus1	6968	14626	0		8.86421
1687	Regions/clus1	7048	14626	0		9.80147
1694	Regions/clus1	7608	14626	0		9.56188
1695	Regions/clus1	7688	14626	0		7.71676
1696	Regions/clus1	7768	14626	0		8.61063
1697	Regions/clus1	7848	14626	0		7.68234
1725	Regions/clus1	1608	14546	0		9.03387
1751	Regions/clus1	3688	14546	0		18.6267
1752	Regions/clus1	3768	14546	0		14.1436
1753	Regions/clus1	3848	14546	0		11.3199
1773	Regions/clus1	5448	14546	0		7.06413
1783	Regions/clus1	6248	14546	0		11.3212
1784	Regions/clus1	6328	14546	0		12.6022
1785	Regions/clus1	6408	14546	0		8.41541
1787	Regions/clus1	6568	14546	0		7.65424
1788	Regions/clus1	6648	14546	0		8.02089
1789	Regions/clus1	6728	14546	0		8.51943
1791	Regions/clus1	6888	14546	0		10.0701
1794	Regions/clus1	7128	14546	0		9.22124
1795	Regions/clus1	7208	14546	0		6.97146
1801	Regions/clus1	7688	14546	0		8.0772
1802	Regions/clus1	7768	14546	0		7.77704
1803	Regions/clus1	7848	14546	0		6.66259
1832	Regions/clus1	1528	14466	0		7.15787
1833	Regions/clus1	1608	14466	0		6.66879
1858	Regions/clus1	3608	14466	0		14.6664
1859	Regions/clus1	3688	14466	0		14.0434
1860	Regions/clus1	3768	14466	0		11.9308
1883	Regions/clus1	5608	14466	0		7.00004
1893	Regions/clus1	6408	14466	0		9.4503
1894	Regions/clus1	6488	14466	0		8.68117
1895	Regions/clus1	6568	14466	0		8.72781
1896	Regions/clus1	6648	14466	0		8.41366
1905	Regions/clus1	7368	14466	0		7.82605
1911	Regions/clus1	7848	14466	0		7.23334
1912	Regions/clus1	7928	14466	0		6.62694
1940	Regions/clus1	1448	14386	0		7.14959
1941	Regions/clus1	1528	14386	0		10.3806
1947	Regions/clus1	2008	14386	0		7.40411
1963	Regions/clus1	3288	14386	0		12.4355
1964	Regions/clus1	3368	14386	0		11.2918
1965	Regions/clus1	3448	14386	0		9.82162
1986	Regions/clus1	5128	14386	0		6.53261
1993	Regions/clus1	5688	14386	0		7.65117
1994	Regions/clus1	5768	14386	0		7.6145
2004	Regions/clus1	6568	14386	0		10.083
2005	Regions/clus1	6648	14386	0		8.72825
2006	Regions/clus1	6728	14386	0		7.91619
2009	Regions/clus1	6968	14386	0		9.27283
2012	Regions/clus1	7208	14386	0		11.2908
2013	Regions/clus1	7288	14386	0		9.51064
2014	Regions/clus1	7368	14386	0		8.66337
2015	Regions/clus1	7448	14386	0		6.97272
2021	Regions/clus1	7928	14386	0		7.53717
2022	Regions/clus1	8008	14386	0		8.22231
2050	Regions/clus1	1448	14306	0		8.97988
2057	Regions/clus1	2008	14306	0		9.03444
2072	Regions/clus1	3208	14306	0		9.52561
2073	Regions/clus1	3288	14306	0		10.0428
2074	Regions/clus1	3368	14306	0		10.5742
2075	Regions/clus1	3448	14306	0		9.89939
2077	Regions/clus1	3608	14306	0		8.79677
2088	Regions/clus1	4488	14306	0		6.56771
2096	Regions/clus1	5128	14306	0		6.72487
2098	Regions/clus1	5288	14306	0		6.74443
2101	Regions/clus1	5528	14306	0		6.63534
2105	Regions/clus1	5848	14306	0		6.49051
2106	Regions/clus1	5928	14306	0		8.71927
2107	Regions/clus1	6008	14306	0		9.16439
2108	Regions/clus1	6088	14306	0		7.88468
2120	Regions/clus1	7048	14306	0		9.26004
2121	Regions/clus1	7128	14306	0		7.01886
2126	Regions/clus1	7528	14306	0		7.11612
2132	Regions/clus1	8008	14306	0		6.39521
2133	Regions/clus1	8088	14306	0		6.63442
2134	Regions/clus1	8168	14306	0		7.51595
2160	Regions/clus1	1368	14226	0		7.2083
2161	Regions/clus1	1448	14226	0		8.43795
2169	Regions/clus1	2088	14226	0		7.76211
2182	Regions/clus1	3128	14226	0		12.5706
2183	Regions/clus1	3208	14226	0		13.1479
2184	Regions/clus1	3288	14226	0		11.2489
2185	Regions/clus1	3368	14226	0		8.28128
2186	Regions/clus1	3448	14226	0		9.1829
2206	Regions/clus1	5048	14226	0		5.26046
2207	Regions/clus1	5128	14226	0		5.40667
2211	Regions/clus1	5448	14226	0		7.42338
2212	Regions/clus1	5528	14226	0		7.60171
2215	Regions/clus1	5768	14226	0		8.29251
2217	Regions/clus1	5928	14226	0		7.48394
2218	Regions/clus1	6008	14226	0		8.48917
2219	Regions/clus1	6088	14226	0		6.59771
2226	Regions/clus1	6648	14226	0		7.9125
2234	Regions/clus1	7288	14226	0		15.1638
2235	Regions/clus1	7368	14226	0		8.5461
2238	Regions/clus1	7608	14226	0		6.34406
2244	Regions/clus1	8088	14226	0		7.07263
2245	Regions/clus1	8168	14226	0		7.46998
2271	Regions/clus1	1368	14146	0		6.93843
2278	Regions/clus1	1928	14146	0		8.00107
2291	Regions/clus1	2968	14146	0		9.15477
2293	Regions/clus1	3128	14146	0		9.354
2295	Regions/clus1	3288	14146	0		8.50538
2296	Regions/clus1	3368	14146	0		9.78393
2297	Regions/clus1	3448	14146	0		8.72848
2299	Regions/clus1	3608	14146	0		7.69127
2309	Regions/clus1	4408	14146	0		7.6677
2310	Regions/clus1	4488	14146	0		5.7561
2317	Regions/clus1	5048	14146	0		5.36618
2318	Regions/clus1	5128	14146	0		5.93193
2322	Regions/clus1	5448	14146	0		7.00692
2324	Regions/clus1	5608	14146	0		7.73631
2325	Regions/clus1	5688	14146	0		6.56694
2326	Regions/clus1	5768	14146	0		7.19546
2328	Regions/clus1	5928	14146	0		7.67555
2329	Regions/clus1	6008	14146	0		7.70253
2330	Regions/clus1	6088	14146	0		8.59948
2338	Regions/clus1	6728	14146	0		7.49576
2339	Regions/clus1	6808	14146	0		7.82452
2347	Regions/clus1	7448	14146	0		9.38591
2348	Regions/clus1	7528	14146	0		9.06746
2350	Regions/clus1	7688	14146	0		7.48598
2351	Regions/clus1	7768	14146	0		8.00596
2355	Regions/clus1	8088	14146	0		5.64289
2356	Regions/clus1	8168	14146	0		7.04379
2357	Regions/clus1	8248	14146	0		6.5172
2383	Regions/clus1	1288	14066	0		7.62398
2387	Regions/clus1	1608	14066	0		7.65277
2406	Regions/clus1	3128	14066	0		9.08976
2407	Regions/clus1	3208	14066	0		8.26159
2408	Regions/clus1	3288	14066	0		8.74807
2409	Regions/clus1	3368	14066	0		7.2133
2410	Regions/clus1	3448	14066	0		7.79935
2411	Regions/clus1	3528	14066	0		9.88349
2414	Regions/clus1	3768	14066	0		7.56587
2417	Regions/clus1	4008	14066	0		6.95939
2421	Regions/clus1	4328	14066	0		6.34371
2422	Regions/clus1	4408	14066	0		6.53527
2423	Regions/clus1	4488	14066	0		5.45997
2425	Regions/clus1	4648	14066	0		5.6874
2429	Regions/clus1	4968	14066	0		6.07406
2431	Regions/clus1	5128	14066	0		5.87755
2432	Regions/clus1	5208	14066	0		6.05172
2437	Regions/clus1	5608	14066	0		6.41524
2438	Regions/clus1	5688	14066	0		7.42314
2440	Regions/clus1	5848	14066	0		7.88257
2441	Regions/clus1	5928	14066	0		8.38743
2442	Regions/clus1	6008	14066	0		7.39836
2443	Regions/clus1	6088	14066	0		8.97504
2444	Regions/clus1	6168	14066	0		7.25772
2448	Regions/clus1	6488	14066	0		9.07871
2460	Regions/clus1	7448	14066	0		8.315
2464	Regions/clus1	7768	14066	0		7.91077
2466	Regions/clus1	7928	14066	0		7.92261
2470	Regions/clus1	8248	14066	0		7.22215
2471	Regions/clus1	8328	14066	0		6.14602
2472	Regions/clus1	8408	14066	0		6.54253
2496	Regions/clus1	1288	13986	0		6.89915
2500	Regions/clus1	1608	13986	0		7.04964
2501	Regions/clus1	1688	13986	0		8.42251
2502	Regions/clus1	1768	13986	0		9.27219
2506	Regions/clus1	2088	13986	0		13.5519
2518	Regions/clus1	3048	13986	0		9.149
2519	Regions/clus1	3128	13986	0		7.89533
2520	Regions/clus1	3208	13986	0		9.286
2521	Regions/clus1	3288	13986	0		7.53107
2522	Regions/clus1	3368	13986	0		7.84378
2523	Regions/clus1	3448	13986	0		7.89277
2524	Regions/clus1	3528	13986	0		8.96221
2525	Regions/clus1	3608	13986	0		9.70783
2528	Regions/clus1	3848	13986	0		8.59612
2532	Regions/clus1	4168	13986	0		10.5031
2533	Regions/clus1	4248	13986	0		7.26164
2534	Regions/clus1	4328	13986	0		6.4807
2536	Regions/clus1	4488	13986	0		5.96722
2537	Regions/clus1	4568	13986	0		5.46058
2541	Regions/clus1	4888	13986	0		5.66187
2545	Regions/clus1	5208	13986	0		5.65736
2546	Regions/clus1	5288	13986	0		6.00837
2550	Regions/clus1	5608	13986	0		7.25355
2552	Regions/clus1	5768	13986	0		6.99579
2553	Regions/clus1	5848	13986	0		8.94651
2555	Regions/clus1	6008	13986	0		8.21852
2559	Regions/clus1	6328	13986	0		8.29694
2560	Regions/clus1	6408	13986	0		8.02847
2572	Regions/clus1	7368	13986	0		10.7159
2573	Regions/clus1	7448	13986	0		8.0822
2576	Regions/clus1	7688	13986	0		9.21579
2583	Regions/clus1	8248	13986	0		7.11765
2584	Regions/clus1	8328	13986	0		6.37656
2608	Regions/clus1	1128	13906	0		7.18426
2609	Regions/clus1	1208	13906	0		8.68757
2612	Regions/clus1	1448	13906	0		6.17746
2613	Regions/clus1	1528	13906	0		7.51279
2614	Regions/clus1	1608	13906	0		8.67309
2626	Regions/clus1	2568	13906	0		13.2224
2631	Regions/clus1	2968	13906	0		9.43045
2632	Regions/clus1	3048	13906	0		8.16983
2633	Regions/clus1	3128	13906	0		7.97462
2634	Regions/clus1	3208	13906	0		6.97016
2635	Regions/clus1	3288	13906	0		6.37139
2638	Regions/clus1	3528	13906	0		8.55489
2640	Regions/clus1	3688	13906	0		7.88371
2641	Regions/clus1	3768	13906	0		7.43766
2644	Regions/clus1	4008	13906	0		6.68175
2647	Regions/clus1	4248	13906	0		7.4241
2662	Regions/clus1	5448	13906	0		7.44956
2666	Regions/clus1	5768	13906	0		7.34292
2667	Regions/clus1	5848	13906	0		7.93085
2668	Regions/clus1	5928	13906	0		8.22609
2669	Regions/clus1	6008	13906	0		7.5986
2670	Regions/clus1	6088	13906	0		6.98687
2672	Regions/clus1	6248	13906	0		8.16221
2691	Regions/clus1	7768	13906	0		7.67275
2697	Regions/clus1	8248	13906	0		7.46088
2698	Regions/clus1	8328	13906	0		6.73656
2699	Regions/clus1	8408	13906	0		6.52101
2723	Regions/clus1	1128	13826	0		6.38211
2729	Regions/clus1	1608	13826	0		12.9202
2746	Regions/clus1	2968	13826	0		9.49412
2747	Regions/clus1	3048	13826	0		9.09077
2748	Regions/clus1	3128	13826	0		8.92534
2749	Regions/clus1	3208	13826	0		9.42131
2750	Regions/clus1	3288	13826	0		7.71963
2752	Regions/clus1	3448	13826	0		8.4451
2753	Regions/clus1	3528	13826	0		8.79423
2759	Regions/clus1	4008	13826	0		6.82459
2778	Regions/clus1	5528	13826	0		6.62014
2779	Regions/clus1	5608	13826	0		6.83183
2781	Regions/clus1	5768	13826	0		6.1136
2782	Regions/clus1	5848	13826	0		7.8856
2783	Regions/clus1	5928	13826	0		7.64564
2784	Regions/clus1	6008	13826	0		8.34336
2785	Regions/clus1	6088	13826	0		8.5231
2786	Regions/clus1	6168	13826	0		5.83119
2787	Regions/clus1	6248	13826	0		6.78929
2788	Regions/clus1	6328	13826	0		7.94708
2789	Regions/clus1	6408	13826	0		7.59744
2790	Regions/clus1	6488	13826	0		8.10179
2799	Regions/clus1	7208	13826	0		9.16061
2802	Regions/clus1	7448	13826	0		7.17715
2803	Regions/clus1	7528	13826	0		9.03551
2813	Regions/clus1	8328	13826	0		6.44698
2814	Regions/clus1	8408	13826	0		5.9566
2837	Regions/clus1	1048	13746	0		7.11008
2838	Regions/clus1	1128	13746	0		7.75878
2841	Regions/clus1	1368	13746	0		7.89464
2860	Regions/clus1	2888	13746	0		8.20285
2861	Regions/clus1	2968	13746	0		8.86698
2862	Regions/clus1	3048	13746	0		7.56879
2863	Regions/clus1	3128	13746	0		9.80453
2864	Regions/clus1	3208	13746	0		7.63932
2878	Regions/clus1	4328	13746	0		6.85833
2894	Regions/clus1	5608	13746	0		6.09586
2895	Regions/clus1	5688	13746	0		5.77702
2896	Regions/clus1	5768	13746	0		6.61303
2897	Regions/clus1	5848	13746	0		9.78508
2898	Regions/clus1	5928	13746	0		11.1892
2899	Regions/clus1	6008	13746	0		8.61912
2900	Regions/clus1	6088	13746	0		7.6222
2901	Regions/clus1	6168	13746	0		7.23251
2902	Regions/clus1	6248	13746	0		6.93477
2903	Regions/clus1	6328	13746	0		7.18651
2905	Regions/clus1	6488	13746	0		7.91962
2908	Regions/clus1	6728	13746	0		7.73017
2916	Regions/clus1	7368	13746	0		8.23386
2920	Regions/clus1	7688	13746	0		6.26775
2922	Regions/clus1	7848	13746	0		7.30595
2925	Regions/clus1	8088	13746	0		7.77065
2926	Regions/clus1	8168	13746	0		7.66495
2927	Regions/clus1	8248	13746	0		7.02398
2928	Regions/clus1	8328	13746	0		6.38254
2929	Regions/clus1	8408	13746	0		6.28264
2954	Regions/clus1	1048	13666	0		7.03965
2961	Regions/clus1	1608	13666	0		9.74885
2975	Regions/clus1	2728	13666	0		11.8814
2977	Regions/clus1	2888	13666	0		10.109
2979	Regions/clus1	3048	13666	0		8.24836
2980	Regions/clus1	3128	13666	0		7.50238
2981	Regions/clus1	3208	13666	0		7.28718
2983	Regions/clus1	3368	13666	0		8.09649
2994	Regions/clus1	4248	13666	0		6.51578
2995	Regions/clus1	4328	13666	0		7.12656
3010	Regions/clus1	5528	13666	0		6.67985
3012	Regions/clus1	5688	13666	0		6.61413
3013	Regions/clus1	5768	13666	0		6.93343
3014	Regions/clus1	5848	13666	0		8.2008
3015	Regions/clus1	5928	13666	0		9.22817
3017	Regions/clus1	6088	13666	0		7.78278
3018	Regions/clus1	6168	13666	0		7.89553
3019	Regions/clus1	6248	13666	0		7.97929
3020	Regions/clus1	6328	13666	0		7.98715
3021	Regions/clus1	6408	13666	0		8.78624
3022	Regions/clus1	6488	13666	0		6.82125
3034	Regions/clus1	7448	13666	0		8.90871
3037	Regions/clus1	7688	13666	0		7.90621
3038	Regions/clus1	7768	13666	0		8.69903
3040	Regions/clus1	7928	13666	0		7.27798
3041	Regions/clus1	8008	13666	0		7.55658
3043	Regions/clus1	8168	13666	0		6.36976
3045	Regions/clus1	8328	13666	0		6.81167
3046	Regions/clus1	8408	13666	0		6.71127
3047	Regions/clus1	8488	13666	0		6.85133
3070	Regions/clus1	968	13586	0		6.33436
3074	Regions/clus1	1288	13586	0		7.45859
3078	Regions/clus1	1608	13586	0		11.6202
3096	Regions/clus1	3048	13586	0		9.15943
3097	Regions/clus1	3128	13586	0		8.50589
3098	Regions/clus1	3208	13586	0		7.27377
3099	Regions/clus1	3288	13586	0		8.25208
3101	Regions/clus1	3448	13586	0		6.67544
3107	Regions/clus1	3928	13586	0		8.3562
3112	Regions/clus1	4328	13586	0		6.85001
3125	Regions/clus1	5368	13586	0		7.1418
3127	Regions/clus1	5528	13586	0		5.93067
3128	Regions/clus1	5608	13586	0		8.97109
3129	Regions/clus1	5688	13586	0		7.81425
3130	Regions/clus1	5768	13586	0		8.04958
3131	Regions/clus1	5848	13586	0		9.07283
3132	Regions/clus1	5928	13586	0		6.76095
3133	Regions/clus1	6008	13586	0		6.12439
3134	Regions/clus1	6088	13586	0		7.16182
3135	Regions/clus1	6168	13586	0		7.09477
3136	Regions/clus1	6248	13586	0		6.3995
3137	Regions/clus1	6328	13586	0		8.24517
3138	Regions/clus1	6408	13586	0		9.48833
3139	Regions/clus1	6488	13586	0		7.95277
3141	Regions/clus1	6648	13586	0		6.77379
3155	Regions/clus1	7768	13586	0		7.56196
3156	Regions/clus1	7848	13586	0		7.52264
3158	Regions/clus1	8008	13586	0		7.43518
3160	Regions/clus1	8168	13586	0		5.98375
3163	Regions/clus1	8408	13586	0		7.1356
3187	Regions/clus1	968	13506	0		8.02697
3191	Regions/clus1	1288	13506	0		7.19472
3192	Regions/clus1	1368	13506	0		9.56086
3193	Regions/clus1	1448	13506	0		7.21515
3209	Regions/clus1	2728	13506	0		10.5575
3210	Regions/clus1	2808	13506	0		10.4451
3212	Regions/clus1	2968	13506	0		10.6266
3214	Regions/clus1	3128	13506	0		10.0564
3215	Regions/clus1	3208	13506	0		9.08
3216	Regions/clus1	3288	13506	0		9.72432
3217	Regions/clus1	3368	13506	0		6.67659
3218	Regions/clus1	3448	13506	0		10.4963
3227	Regions/clus1	4168	13506	0		7.23151
3244	Regions/clus1	5528	13506	0		6.96762
3245	Regions/clus1	5608	13506	0		7.31871
3246	Regions/clus1	5688	13506	0		7.71275
3247	Regions/clus1	5768	13506	0		7.0904
3248	Regions/clus1	5848	13506	0		8.08462
3249	Regions/clus1	5928	13506	0		7.16801
3250	Regions/clus1	6008	13506	0		7.36733
3251	Regions/clus1	6088	13506	0		7.17051
3252	Regions/clus1	6168	13506	0		7.79735
3253	Regions/clus1	6248	13506	0		6.53251
3254	Regions/clus1	6328	13506	0		7.04909
3255	Regions/clus1	6408	13506	0		8.93549
3256	Regions/clus1	6488	13506	0		8.43897
3258	Regions/clus1	6648	13506	0		5.90722
3267	Regions/clus1	7368	13506	0		8.21183
3269	Regions/clus1	7528	13506	0		6.38757
3272	Regions/clus1	7768	13506	0		9.29677
3274	Regions/clus1	7928	13506	0		6.63076
3275	Regions/clus1	8008	13506	0		6.65477
3276	Regions/clus1	8088	13506	0		7.33717
3280	Regions/clus1	8408	13506	0		7.32385
3305	Regions/clus1	968	13426	0		6.96846
3306	Regions/clus1	1048	13426	0		7.14594
3310	Regions/clus1	1368	13426	0		8.22343
3312	Regions/clus1	1528	13426	0		8.68483
3325	Regions/clus1	2568	13426	0		7.8775
3328	Regions/clus1	2808	13426	0		10.4215
3332	Regions/clus1	3128	13426	0		10.5781
3333	Regions/clus1	3208	13426	0		8.57611
3334	Regions/clus1	3288	13426	0		7.78333
3335	Regions/clus1	3368	13426	0		9.03927
3336	Regions/clus1	3448	13426	0		8.5552
3338	Regions/clus1	3608	13426	0		7.24845
3342	Regions/clus1	3928	13426	0		7.62184
3343	Regions/clus1	4008	13426	0		7.97177
3345	Regions/clus1	4168	13426	0		6.63422
3348	Regions/clus1	4408	13426	0		6.4167
3361	Regions/clus1	5448	13426	0		6.44966
3362	Regions/clus1	5528	13426	0		7.7917
3363	Regions/clus1	5608	13426	0		6.55629
3364	Regions/clus1	5688	13426	0		7.72715
3365	Regions/clus1	5768	13426	0		6.63006
3366	Regions/clus1	5848	13426	0		7.8092
3367	Regions/clus1	5928	13426	0		6.88622
3370	Regions/clus1	6168	13426	0		6.88906
3371	Regions/clus1	6248	13426	0		6.99625
3372	Regions/clus1	6328	13426	0		8.64924
3373	Regions/clus1	6408	13426	0		7.76929
3374	Regions/clus1	6488	13426	0		9.20929
3383	Regions/clus1	7208	13426	0		7.18871
3386	Regions/clus1	7448	13426	0		6.99384
3387	Regions/clus1	7528	13426	0		8.02996
3389	Regions/clus1	7688	13426	0		7.62097
3390	Regions/clus1	7768	13426	0		7.34217
3391	Regions/clus1	7848	13426	0		8.04579
3392	Regions/clus1	7928	13426	0		8.46313
3393	Regions/clus1	8008	13426	0		7.77838
3395	Regions/clus1	8168	13426	0		7.39411
3399	Regions/clus1	8488	13426	0		7.41763
3426	Regions/clus1	1208	13346	0		9.37345
3430	Regions/clus1	1528	13346	0		8.16428
3444	Regions/clus1	2648	13346	0		7.16645
3446	Regions/clus1	2808	13346	0		9.60299
3449	Regions/clus1	3048	13346	0		8.25249
3450	Regions/clus1	3128	13346	0		10.8604
3451	Regions/clus1	3208	13346	0		10.6013
3452	Regions/clus1	3288	13346	0		8.1944
3453	Regions/clus1	3368	13346	0		10.2116
3454	Regions/clus1	3448	13346	0		8.36878
3457	Regions/clus1	3688	13346	0		8.51679
3464	Regions/clus1	4248	13346	0		5.87695
3474	Regions/clus1	5048	13346	0		6.36351
3475	Regions/clus1	5128	13346	0		8.36735
3476	Regions/clus1	5208	13346	0		6.47412
3477	Regions/clus1	5288	13346	0		6.634
3479	Regions/clus1	5448	13346	0		6.91879
3480	Regions/clus1	5528	13346	0		6.48249
3481	Regions/clus1	5608	13346	0		6.70245
3482	Regions/clus1	5688	13346	0		7.03769
3483	Regions/clus1	5768	13346	0		8.30048
3484	Regions/clus1	5848	13346	0		6.1559
3485	Regions/clus1	5928	13346	0		6.71594
3486	Regions/clus1	6008	13346	0		6.82051
3487	Regions/clus1	6088	13346	0		6.35359
3488	Regions/clus1	6168	13346	0		7.35455
3489	Regions/clus1	6248	13346	0		6.89861
3491	Regions/clus1	6408	13346	0		6.96607
3493	Regions/clus1	6568	13346	0		7.39705
3494	Regions/clus1	6648	13346	0		7.68152
3495	Regions/clus1	6728	13346	0		7.43015
3496	Regions/clus1	6808	13346	0		7.32711
3503	Regions/clus1	7368	13346	0		6.95857
3508	Regions/clus1	7768	13346	0		6.2886
3542	Regions/clus1	968	13266	0		6.88261
3563	Regions/clus1	2648	13266	0		8.0613
3564	Regions/clus1	2728	13266	0		8.07904
3568	Regions/clus1	3048	13266	0		9.82983
3569	Regions/clus1	3128	13266	0		10.499
3570	Regions/clus1	3208	13266	0		9.77644
3571	Regions/clus1	3288	13266	0		9.04629
3572	Regions/clus1	3368	13266	0		8.49218
3573	Regions/clus1	3448	13266	0		8.81537
3574	Regions/clus1	3528	13266	0		8.22189
3576	Regions/clus1	3688	13266	0		7.03993
3579	Regions/clus1	3928	13266	0		7.8231
3581	Regions/clus1	4088	13266	0		8.39543
3595	Regions/clus1	5208	13266	0		7.67957
3596	Regions/clus1	5288	13266	0		7.05442
3597	Regions/clus1	5368	13266	0		8.04526
3598	Regions/clus1	5448	13266	0		5.23106
3600	Regions/clus1	5608	13266	0		8.19455
3601	Regions/clus1	5688	13266	0		7.53214
3602	Regions/clus1	5768	13266	0		6.95443
3604	Regions/clus1	5928	13266	0		7.77753
3605	Regions/clus1	6008	13266	0		7.60665
3606	Regions/clus1	6088	13266	0		7.16275
3608	Regions/clus1	6248	13266	0		6.11966
3611	Regions/clus1	6488	13266	0		7.22854
3612	Regions/clus1	6568	13266	0		8.66106
3621	Regions/clus1	7288	13266	0		7.88641
3622	Regions/clus1	7368	13266	0		7.19099
3623	Regions/clus1	7448	13266	0		7.94515
3626	Regions/clus1	7688	13266	0		6.89451
3629	Regions/clus1	7928	13266	0		5.61383
3630	Regions/clus1	8008	13266	0		8.09859
3636	Regions/clus1	8488	13266	0		6.0347
3662	Regions/clus1	968	13186	0		6.66852
3665	Regions/clus1	1208	13186	0		6.79595
3669	Regions/clus1	1528	13186	0		8.80383
3684	Regions/clus1	2728	13186	0		10.145
3685	Regions/clus1	2808	13186	0		7.39467
3686	Regions/clus1	2888	13186	0		7.79175
3687	Regions/clus1	2968	13186	0		8.32058
3688	Regions/clus1	3048	13186	0		8.176
3689	Regions/clus1	3128	13186	0		11.4586
3690	Regions/clus1	3208	13186	0		8.6499
3691	Regions/clus1	3288	13186	0		8.01325
3692	Regions/clus1	3368	13186	0		7.42609
3693	Regions/clus1	3448	13186	0		7.6362
3694	Regions/clus1	3528	13186	0		9.5651
3697	Regions/clus1	3768	13186	0		7.47432
3699	Regions/clus1	3928	13186	0		7.39593
3700	Regions/clus1	4008	13186	0		7.31696
3702	Regions/clus1	4168	13186	0		6.85952
3703	Regions/clus1	4248	13186	0		6.91125
3704	Regions/clus1	4328	13186	0		6.62832
3715	Regions/clus1	5208	13186	0		7.01076
3716	Regions/clus1	5288	13186	0		8.56323
3718	Regions/clus1	5448	13186	0		9.1026
3719	Regions/clus1	5528	13186	0		6.60867
3720	Regions/clus1	5608	13186	0		8.92693
3721	Regions/clus1	5688	13186	0		7.2668
3722	Regions/clus1	5768	13186	0		7.55596
3723	Regions/clus1	5848	13186	0		8.15946
3724	Regions/clus1	5928	13186	0		9.30907
3725	Regions/clus1	6008	13186	0		6.64557
3726	Regions/clus1	6088	13186	0		7.71206
3727	Regions/clus1	6168	13186	0		6.50077
3729	Regions/clus1	6328	13186	0		8.15644
3730	Regions/clus1	6408	13186	0		7.60891
3731	Regions/clus1	6488	13186	0		8.79799
3732	Regions/clus1	6568	13186	0		7.61372
3742	Regions/clus1	7368	13186	0		7.12648
3743	Regions/clus1	7448	13186	0		8.16638
3744	Regions/clus1	7528	13186	0		7.00913
3746	Regions/clus1	7688	13186	0		7.25024
3749	Regions/clus1	7928	13186	0		6.95801
3753	Regions/clus1	8248	13186	0		7.03023
3754	Regions/clus1	8328	13186	0		6.37198
3757	Regions/clus1	8568	13186	0		7.27016
3788	Regions/clus1	1448	13106	0		8.57186
3789	Regions/clus1	1528	13106	0		9.76908
3804	Regions/clus1	2728	13106	0		6.24319
3805	Regions/clus1	2808	13106	0		8.83792
3806	Regions/clus1	2888	13106	0		7.74849
3807	Regions/clus1	2968	13106	0		8.02031
3809	Regions/clus1	3128	13106	0		8.23837
3810	Regions/clus1	3208	13106	0		9.77041
3812	Regions/clus1	3368	13106	0		7.35693
3813	Regions/clus1	3448	13106	0		9.1768
3814	Regions/clus1	3528	13106	0		6.45518
3819	Regions/clus1	3928	13106	0		6.89584
3820	Regions/clus1	4008	13106	0		6.11592
3821	Regions/clus1	4088	13106	0		7.34341
3824	Regions/clus1	4328	13106	0		6.42321
3825	Regions/clus1	4408	13106	0		8.08877
3833	Regions/clus1	5048	13106	0		5.84348
3834	Regions/clus1	5128	13106	0		8.17579
3835	Regions/clus1	5208	13106	0		7.05718
3836	Regions/clus1	5288	13106	0		6.57377
3837	Regions/clus1	5368	13106	0		5.9469
3838	Regions/clus1	5448	13106	0		7.39734
3839	Regions/clus1	5528	13106	0		6.83052
3840	Regions/clus1	5608	13106	0		6.38506
3841	Regions/clus1	5688	13106	0		6.89019
3842	Regions/clus1	5768	13106	0		8.68867
3844	Regions/clus1	5928	13106	0		7.03946
3845	Regions/clus1	6008	13106	0		8.03125
3846	Regions/clus1	6088	13106	0		7.45782
3847	Regions/clus1	6168	13106	0		8.92457
3851	Regions/clus1	6488	13106	0		9.67783
3863	Regions/clus1	7448	13106	0		8.72124
3864	Regions/clus1	7528	13106	0		7.36906
3867	Regions/clus1	7768	13106	0		7.10506
3868	Regions/clus1	7848	13106	0		7.71032
3924	Regions/clus1	2728	13026	0		7.24274
3926	Regions/clus1	2888	13026	0		7.56601
3927	Regions/clus1	2968	13026	0		9.28255
3930	Regions/clus1	3208	13026	0		7.91979
3931	Regions/clus1	3288	13026	0		7.87377
3932	Regions/clus1	3368	13026	0		7.48675
3933	Regions/clus1	3448	13026	0		7.13368
3934	Regions/clus1	3528	13026	0		7.89276
3935	Regions/clus1	3608	13026	0		7.05919
3936	Regions/clus1	3688	13026	0		7.19006
3942	Regions/clus1	4168	13026	0		6.96594
3943	Regions/clus1	4248	13026	0		8.53303
3945	Regions/clus1	4408	13026	0		7.97535
3953	Regions/clus1	5048	13026	0		7.41899
3956	Regions/clus1	5288	13026	0		5.81007
3957	Regions/clus1	5368	13026	0		6.93178
3959	Regions/clus1	5528	13026	0		7.5022
3960	Regions/clus1	5608	13026	0		6.98747
3961	Regions/clus1	5688	13026	0		9.35949
3962	Regions/clus1	5768	13026	0		7.19786
3963	Regions/clus1	5848	13026	0		8.75918
3965	Regions/clus1	6008	13026	0		8.15173
3966	Regions/clus1	6088	13026	0		6.44296
3968	Regions/clus1	6248	13026	0		8.11391
3970	Regions/clus1	6408	13026	0		9.30743
3971	Regions/clus1	6488	13026	0		7.08202
3972	Regions/clus1	6568	13026	0		8.80549
3982	Regions/clus1	7368	13026	0		7.65248
3983	Regions/clus1	7448	13026	0		6.92404
3986	Regions/clus1	7688	13026	0		7.82857
3997	Regions/clus1	8568	13026	0		5.67977
3998	Regions/clus1	8648	13026	0		6.00339
4021	Regions/clus1	968	12946	0		5.94612
4044	Regions/clus1	2808	12946	0		9.25858
4045	Regions/clus1	2888	12946	0		9.55726
4047	Regions/clus1	3048	12946	0		8.2769
4048	Regions/clus1	3128	12946	0		7.41764
4049	Regions/clus1	3208	12946	0		7.35692
4050	Regions/clus1	3288	12946	0		7.86619
4051	Regions/clus1	3368	12946	0		9.06715
4053	Regions/clus1	3528	12946	0		7.28985
4054	Regions/clus1	3608	12946	0		6.14914
4057	Regions/clus1	3848	12946	0		8.05274
4058	Regions/clus1	3928	12946	0		6.83625
4059	Regions/clus1	4008	12946	0		7.32773
4062	Regions/clus1	4248	12946	0		7.47322
4076	Regions/clus1	5368	12946	0		6.91723
4077	Regions/clus1	5448	12946	0		6.62228
4078	Regions/clus1	5528	12946	0		7.56853
4079	Regions/clus1	5608	12946	0		7.47656
4080	Regions/clus1	5688	12946	0		6.60355
4081	Regions/clus1	5768	12946	0		7.01978
4082	Regions/clus1	5848	12946	0		9.10671
4083	Regions/clus1	5928	12946	0		7.57777
4084	Regions/clus1	6008	12946	0		7.85306
4085	Regions/clus1	6088	12946	0		6.11702
4087	Regions/clus1	6248	12946	0		7.85798
4090	Regions/clus1	6488	12946	0		9.00683
4101	Regions/clus1	7368	12946	0		7.1331
4102	Regions/clus1	7448	12946	0		7.91675
4103	Regions/clus1	7528	12946	0		7.77235
4104	Regions/clus1	7608	12946	0		6.25194
4105	Regions/clus1	7688	12946	0		8.8701
4106	Regions/clus1	7768	12946	0		6.35255
4107	Regions/clus1	7848	12946	0		6.7475
4108	Regions/clus1	7928	12946	0		8.4806
4116	Regions/clus1	8568	12946	0		5.51634
4117	Regions/clus1	8648	12946	0		6.38635
4164	Regions/clus1	2888	12866	0		7.56734
4165	Regions/clus1	2968	12866	0		6.70178
4167	Regions/clus1	3128	12866	0		8.02989
4168	Regions/clus1	3208	12866	0		6.88581
4169	Regions/clus1	3288	12866	0		8.06376
4170	Regions/clus1	3368	12866	0		7.08294
4171	Regions/clus1	3448	12866	0		7.23564
4172	Regions/clus1	3528	12866	0		7.99186
4173	Regions/clus1	3608	12866	0		8.16016
4175	Regions/clus1	3768	12866	0		6.90071
4176	Regions/clus1	3848	12866	0		7.00639
4177	Regions/clus1	3928	12866	0		6.58393
4178	Regions/clus1	4008	12866	0		7.4939
4179	Regions/clus1	4088	12866	0		7.9585
4182	Regions/clus1	4328	12866	0		6.10135
4195	Regions/clus1	5368	12866	0		6.73722
4196	Regions/clus1	5448	12866	0		7.06576
4197	Regions/clus1	5528	12866	0		6.6311
4198	Regions/clus1	5608	12866	0		6.49633
4199	Regions/clus1	5688	12866	0		8.64495
4200	Regions/clus1	5768	12866	0		7.78467
4201	Regions/clus1	5848	12866	0		8.40671
4202	Regions/clus1	5928	12866	0		7.52195
4203	Regions/clus1	6008	12866	0		6.43563
4204	Regions/clus1	6088	12866	0		8.97384
4206	Regions/clus1	6248	12866	0		8.65905
4208	Regions/clus1	6408	12866	0		8.43632
4209	Regions/clus1	6488	12866	0		8.11774
4220	Regions/clus1	7368	12866	0		8.97237
4221	Regions/clus1	7448	12866	0		7.6242
4224	Regions/clus1	7688	12866	0		7.00623
4225	Regions/clus1	7768	12866	0		5.25988
4226	Regions/clus1	7848	12866	0		6.45971
4227	Regions/clus1	7928	12866	0		7.35349
4229	Regions/clus1	8088	12866	0		9.06166
4230	Regions/clus1	8168	12866	0		5.85842
4231	Regions/clus1	8248	12866	0		6.55259
4234	Regions/clus1	8488	12866	0		6.40748
4285	Regions/clus1	3048	12786	0		8.24068
4286	Regions/clus1	3128	12786	0		7.62537
4287	Regions/clus1	3208	12786	0		6.98715
4288	Regions/clus1	3288	12786	0		8.24946
4289	Regions/clus1	3368	12786	0		8.80209
4290	Regions/clus1	3448	12786	0		7.81904
4292	Regions/clus1	3608	12786	0		6.12381
4293	Regions/clus1	3688	12786	0		6.74272
4294	Regions/clus1	3768	12786	0		6.18792
4295	Regions/clus1	3848	12786	0		7.11946
4296	Regions/clus1	3928	12786	0		6.4085
4297	Regions/clus1	4008	12786	0		7.39965
4298	Regions/clus1	4088	12786	0		6.72832
4314	Regions/clus1	5368	12786	0		7.51802
4315	Regions/clus1	5448	12786	0		7.02255
4316	Regions/clus1	5528	12786	0		6.20577
4317	Regions/clus1	5608	12786	0		7.60282
4318	Regions/clus1	5688	12786	0		8.59211
4320	Regions/clus1	5848	12786	0		7.44958
4323	Regions/clus1	6088	12786	0		8.55498
4324	Regions/clus1	6168	12786	0		8.69278
4325	Regions/clus1	6248	12786	0		7.78245
4326	Regions/clus1	6328	12786	0		9.79251
4338	Regions/clus1	7288	12786	0		8.23821
4339	Regions/clus1	7368	12786	0		8.01245
4340	Regions/clus1	7448	12786	0		5.86713
4341	Regions/clus1	7528	12786	0		6.87503
4342	Regions/clus1	7608	12786	0		7.49914
4343	Regions/clus1	7688	12786	0		6.81214
4344	Regions/clus1	7768	12786	0		6.11175
4345	Regions/clus1	7848	12786	0		7.1593
4350	Regions/clus1	8248	12786	0		6.6363
4351	Regions/clus1	8328	12786	0		7.08992
4353	Regions/clus1	8488	12786	0		6.83046
4378	Regions/clus1	968	12706	0		7.45026
4404	Regions/clus1	3048	12706	0		6.79024
4406	Regions/clus1	3208	12706	0		7.16073
4407	Regions/clus1	3288	12706	0		6.94238
4408	Regions/clus1	3368	12706	0		5.75128
4412	Regions/clus1	3688	12706	0		7.49684
4413	Regions/clus1	3768	12706	0		5.97358
4414	Regions/clus1	3848	12706	0		6.99612
4415	Regions/clus1	3928	12706	0		5.35207
4416	Regions/clus1	4008	12706	0		5.43014
4434	Regions/clus1	5448	12706	0		5.859
4435	Regions/clus1	5528	12706	0		6.6049
4436	Regions/clus1	5608	12706	0		6.4571
4437	Regions/clus1	5688	12706	0		6.82333
4439	Regions/clus1	5848	12706	0		7.88183
4440	Regions/clus1	5928	12706	0		7.33353
4444	Regions/clus1	6248	12706	0		8.18953
4458	Regions/clus1	7368	12706	0		7.47547
4459	Regions/clus1	7448	12706	0		7.29638
4461	Regions/clus1	7608	12706	0		7.29416
4529	Regions/clus1	3448	12626	0		6.30887
4532	Regions/clus1	3688	12626	0		6.40625
4533	Regions/clus1	3768	12626	0		6.58951
4534	Regions/clus1	3848	12626	0		5.11287
4535	Regions/clus1	3928	12626	0		7.11667
4537	Regions/clus1	4088	12626	0		7.07502
4554	Regions/clus1	5448	12626	0		6.35458
4555	Regions/clus1	5528	12626	0		5.59929
4556	Regions/clus1	5608	12626	0		6.1181
4557	Regions/clus1	5688	12626	0		7.22758
4558	Regions/clus1	5768	12626	0		8.36945
4563	Regions/clus1	6168	12626	0		9.36441
4565	Regions/clus1	6328	12626	0		7.83617
4577	Regions/clus1	7288	12626	0		8.81957
4580	Regions/clus1	7528	12626	0		6.64487
4653	Regions/clus1	3848	12546	0		5.67851
4654	Regions/clus1	3928	12546	0		7.25618
4655	Regions/clus1	4008	12546	0		5.95885
4656	Regions/clus1	4088	12546	0		5.98535
4674	Regions/clus1	5528	12546	0		6.97776
4675	Regions/clus1	5608	12546	0		9.00681
4676	Regions/clus1	5688	12546	0		6.84299
4680	Regions/clus1	6008	12546	0		7.52214
4682	Regions/clus1	6168	12546	0		6.59892
4684	Regions/clus1	6328	12546	0		6.35047
4688	Regions/clus1	6648	12546	0		7.89754
4689	Regions/clus1	6728	12546	0		8.2357
4691	Regions/clus1	6888	12546	0		7.97252
4695	Regions/clus1	7208	12546	0		7.24147
4698	Regions/clus1	7448	12546	0		8.47774
4762	Regions/clus1	3048	12466	0		6.30938
4774	Regions/clus1	4008	12466	0		5.59397
4789	Regions/clus1	5208	12466	0		6.64215
4791	Regions/clus1	5368	12466	0		5.73455
4792	Regions/clus1	5448	12466	0		6.76551
4793	Regions/clus1	5528	12466	0		7.36699
4794	Regions/clus1	5608	12466	0		5.98375
4795	Regions/clus1	5688	12466	0		6.94754
4796	Regions/clus1	5768	12466	0		7.7763
4798	Regions/clus1	5928	12466	0		6.05223
4799	Regions/clus1	6008	12466	0		6.80534
4800	Regions/clus1	6088	12466	0		5.81653
4801	Regions/clus1	6168	12466	0		6.58967
4809	Regions/clus1	6808	12466	0		19.6142
4810	Regions/clus1	6888	12466	0		8.51243
4811	Regions/clus1	6968	12466	0		7.13462
4813	Regions/clus1	7128	12466	0		7.718
4814	Regions/clus1	7208	12466	0		7.16568
4815	Regions/clus1	7288	12466	0		7.03719
4893	Regions/clus1	4008	12386	0		5.92798
4911	Regions/clus1	5448	12386	0		5.64591
4912	Regions/clus1	5528	12386	0		6.17092
4913	Regions/clus1	5608	12386	0		5.96143
4914	Regions/clus1	5688	12386	0		6.77118
4916	Regions/clus1	5848	12386	0		6.47768
4917	Regions/clus1	5928	12386	0		6.66749
4918	Regions/clus1	6008	12386	0		6.70815
4919	Regions/clus1	6088	12386	0		6.95114
4929	Regions/clus1	6888	12386	0		8.30507
4931	Regions/clus1	7048	12386	0		9.61384
5004	Regions/clus1	3448	12306	0		5.90188
5006	Regions/clus1	3608	12306	0		6.98264
5007	Regions/clus1	3688	12306	0		8.22762
5008	Regions/clus1	3768	12306	0		7.58826
5011	Regions/clus1	4008	12306	0		4.89686
5026	Regions/clus1	5208	12306	0		8.06918
5027	Regions/clus1	5288	12306	0		5.9387
5028	Regions/clus1	5368	12306	0		6.51828
5029	Regions/clus1	5448	12306	0		7.05454
5030	Regions/clus1	5528	12306	0		6.85801
5031	Regions/clus1	5608	12306	0		6.23946
5033	Regions/clus1	5768	12306	0		6.63216
5034	Regions/clus1	5848	12306	0		6.39319
5035	Regions/clus1	5928	12306	0		6.1528
5036	Regions/clus1	6008	12306	0		6.77137
5046	Regions/clus1	6808	12306	0		8.56215
5047	Regions/clus1	6888	12306	0		8.76548
5048	Regions/clus1	6968	12306	0		7.67453
5049	Regions/clus1	7048	12306	0		5.88984
5119	Regions/clus1	3208	12226	0		5.48317
5120	Regions/clus1	3288	12226	0		6.19503
5122	Regions/clus1	3448	12226	0		5.90206
5125	Regions/clus1	3688	12226	0		7.07119
5126	Regions/clus1	3768	12226	0		6.93381
5128	Regions/clus1	3928	12226	0		5.40887
5129	Regions/clus1	4008	12226	0		6.61076
5132	Regions/clus1	4248	12226	0		6.1667
5149	Regions/clus1	5608	12226	0		6.60678
5150	Regions/clus1	5688	12226	0		7.75072
5151	Regions/clus1	5768	12226	0		5.84877
5153	Regions/clus1	5928	12226	0		6.57775
5235	Regions/clus1	3208	12146	0		6.39757
5236	Regions/clus1	3288	12146	0		7.2344
5237	Regions/clus1	3368	12146	0		5.34272
5238	Regions/clus1	3448	12146	0		5.21235
5239	Regions/clus1	3528	12146	0		5.60248
5240	Regions/clus1	3608	12146	0		6.71552
5241	Regions/clus1	3688	12146	0		5.52349
5242	Regions/clus1	3768	12146	0		5.5406
5244	Regions/clus1	3928	12146	0		5.09083
5246	Regions/clus1	4088	12146	0		6.16746
5247	Regions/clus1	4168	12146	0		5.78299
5264	Regions/clus1	5528	12146	0		6.69976
5266	Regions/clus1	5688	12146	0		6.45674
5267	Regions/clus1	5768	12146	0		6.8149
5269	Regions/clus1	5928	12146	0		6.15708
5270	Regions/clus1	6008	12146	0		7.81714
5278	Regions/clus1	6648	12146	0		6.76581
5351	Regions/clus1	3208	12066	0		6.29827
5352	Regions/clus1	3288	12066	0		6.21257
5353	Regions/clus1	3368	12066	0		6.12993
5354	Regions/clus1	3448	12066	0		5.3408
5355	Regions/clus1	3528	12066	0		5.25744
5356	Regions/clus1	3608	12066	0		4.93309
5358	Regions/clus1	3768	12066	0		5.22972
5360	Regions/clus1	3928	12066	0		5.74202
5361	Regions/clus1	4008	12066	0		5.63925
5380	Regions/clus1	5528	12066	0		5.87965
5381	Regions/clus1	5608	12066	0		6.12808
5382	Regions/clus1	5688	12066	0		6.65352
5383	Regions/clus1	5768	12066	0		7.66182
5385	Regions/clus1	5928	12066	0		8.22646
5392	Regions/clus1	6488	12066	0		6.69448
5393	Regions/clus1	6568	12066	0		7.21072
5398	Regions/clus1	6968	12066	0		6.77525
5467	Regions/clus1	3288	11986	0		6.30971
5468	Regions/clus1	3368	11986	0		6.0761
5469	Regions/clus1	3448	11986	0		5.93721
5470	Regions/clus1	3528	11986	0		5.49134
5471	Regions/clus1	3608	11986	0		5.43973
5472	Regions/clus1	3688	11986	0		5.32891
5473	Regions/clus1	3768	11986	0		5.4773
5474	Regions/clus1	3848	11986	0		5.43924
5476	Regions/clus1	4008	11986	0		5.42656
5494	Regions/clus1	5448	11986	0		6.08992
5495	Regions/clus1	5528	11986	0		5.88721
5499	Regions/clus1	5848	11986	0		7.05178
5500	Regions/clus1	5928	11986	0		7.56758
5501	Regions/clus1	6008	11986	0		7.18531
5573	Regions/clus1	2568	11906	0		7.29931
5582	Regions/clus1	3288	11906	0		5.81335
5583	Regions/clus1	3368	11906	0		5.95729
5584	Regions/clus1	3448	11906	0		6.01376
5585	Regions/clus1	3528	11906	0		5.69311
5587	Regions/clus1	3688	11906	0		5.91315
5588	Regions/clus1	3768	11906	0		6.13741
5589	Regions/clus1	3848	11906	0		5.10879
5590	Regions/clus1	3928	11906	0		5.57771
5591	Regions/clus1	4008	11906	0		5.56176
5610	Regions/clus1	5528	11906	0		5.58009
5611	Regions/clus1	5608	11906	0		5.05604
5612	Regions/clus1	5688	11906	0		5.86035
5613	Regions/clus1	5768	11906	0		5.563
5615	Regions/clus1	5928	11906	0		6.32412
5655	Regions/clus1	9128	11906	0		17.0904
5688	Regions/clus1	2648	11826	0		14.2959
5689	Regions/clus1	2728	11826	0		8.13069
5690	Regions/clus1	2808	11826	0		7.6669
5697	Regions/clus1	3368	11826	0		6.51872
5698	Regions/clus1	3448	11826	0		5.3989
5699	Regions/clus1	3528	11826	0		6.4345
5700	Regions/clus1	3608	11826	0		5.1274
5701	Regions/clus1	3688	11826	0		5.18716
5702	Regions/clus1	3768	11826	0		5.58324
5703	Regions/clus1	3848	11826	0		5.4237
5704	Regions/clus1	3928	11826	0		5.94901
5705	Regions/clus1	4008	11826	0		6.53668
5723	Regions/clus1	5448	11826	0		5.31307
5724	Regions/clus1	5528	11826	0		6.24326
5725	Regions/clus1	5608	11826	0		5.55157
5726	Regions/clus1	5688	11826	0		5.97844
5727	Regions/clus1	5768	11826	0		6.30821
5728	Regions/clus1	5848	11826	0		6.81408
5729	Regions/clus1	5928	11826	0		6.70877
5730	Regions/clus1	6008	11826	0		5.40165
5731	Regions/clus1	6088	11826	0		7.20794
5732	Regions/clus1	6168	11826	0		6.28456
5769	Regions/clus1	9128	11826	0		7.18314
5798	Regions/clus1	2408	11746	0		7.49341
5802	Regions/clus1	2728	11746	0		7.82687
5803	Regions/clus1	2808	11746	0		7.5618
5804	Regions/clus1	2888	11746	0		6.34875
5811	Regions/clus1	3448	11746	0		6.20386
5812	Regions/clus1	3528	11746	0		6.24059
5813	Regions/clus1	3608	11746	0		6.00593
5814	Regions/clus1	3688	11746	0		5.63654
5817	Regions/clus1	3928	11746	0		6.41655
5818	Regions/clus1	4008	11746	0		5.31321
5835	Regions/clus1	5368	11746	0		5.30524
5837	Regions/clus1	5528	11746	0		5.92276
5838	Regions/clus1	5608	11746	0		5.92037
5839	Regions/clus1	5688	11746	0		6.5501
5840	Regions/clus1	5768	11746	0		6.01609
5842	Regions/clus1	5928	11746	0		6.87121
5846	Regions/clus1	6248	11746	0		6.65287
5847	Regions/clus1	6328	11746	0		6.9408
5851	Regions/clus1	6648	11746	0		6.31925
5852	Regions/clus1	6728	11746	0		5.18713
5915	Regions/clus1	2808	11666	0		6.75392
5916	Regions/clus1	2888	11666	0		6.59763
5917	Regions/clus1	2968	11666	0		6.25551
5923	Regions/clus1	3448	11666	0		6.60572
5924	Regions/clus1	3528	11666	0		5.66091
5925	Regions/clus1	3608	11666	0		7.16238
5926	Regions/clus1	3688	11666	0		5.98389
5927	Regions/clus1	3768	11666	0		4.82482
5928	Regions/clus1	3848	11666	0		6.00052
5929	Regions/clus1	3928	11666	0		6.33725
5949	Regions/clus1	5528	11666	0		6.11314
5950	Regions/clus1	5608	11666	0		5.10545
5952	Regions/clus1	5768	11666	0		6.43401
5953	Regions/clus1	5848	11666	0		6.51318
5955	Regions/clus1	6008	11666	0		6.21491
5957	Regions/clus1	6168	11666	0		7.24737
5958	Regions/clus1	6248	11666	0		6.88951
6029	Regions/clus1	3048	11586	0		6.01582
6037	Regions/clus1	3688	11586	0		6.66232
6038	Regions/clus1	3768	11586	0		5.39131
6039	Regions/clus1	3848	11586	0		5.41606
6040	Regions/clus1	3928	11586	0		5.44559
6060	Regions/clus1	5528	11586	0		6.35611
6061	Regions/clus1	5608	11586	0		5.53859
6062	Regions/clus1	5688	11586	0		6.97664
6064	Regions/clus1	5848	11586	0		5.75984
6067	Regions/clus1	6088	11586	0		6.52003
6068	Regions/clus1	6168	11586	0		5.71105
6069	Regions/clus1	6248	11586	0		5.97972
6102	Regions/clus1	8888	11586	0		10.0963
6137	Regions/clus1	2968	11506	0		7.27168
6140	Regions/clus1	3208	11506	0		6.13612
6145	Regions/clus1	3608	11506	0		6.77563
6146	Regions/clus1	3688	11506	0		6.01453
6147	Regions/clus1	3768	11506	0		5.95213
6149	Regions/clus1	3928	11506	0		6.08408
6168	Regions/clus1	5448	11506	0		5.82381
6170	Regions/clus1	5608	11506	0		5.29991
6171	Regions/clus1	5688	11506	0		6.17382
6174	Regions/clus1	5928	11506	0		6.5979
6176	Regions/clus1	6088	11506	0		6.73395
6177	Regions/clus1	6168	11506	0		6.91822
6178	Regions/clus1	6248	11506	0		5.79234
6246	Regions/clus1	3208	11426	0		6.7302
6247	Regions/clus1	3288	11426	0		5.99398
6249	Regions/clus1	3448	11426	0		5.90599
6251	Regions/clus1	3608	11426	0		5.8189
6253	Regions/clus1	3768	11426	0		5.97832
6254	Regions/clus1	3848	11426	0		6.15293
6255	Regions/clus1	3928	11426	0		5.20949
6275	Regions/clus1	5528	11426	0		5.74504
6276	Regions/clus1	5608	11426	0		4.99827
6277	Regions/clus1	5688	11426	0		5.43116
6282	Regions/clus1	6088	11426	0		6.76936
6283	Regions/clus1	6168	11426	0		5.51561
6352	Regions/clus1	3608	11346	0		7.59332
6353	Regions/clus1	3688	11346	0		6.37229
6354	Regions/clus1	3768	11346	0		6.4898
6355	Regions/clus1	3848	11346	0		6.79743
6376	Regions/clus1	5528	11346	0		5.24062
6380	Regions/clus1	5848	11346	0		6.79331
6381	Regions/clus1	5928	11346	0		6.82998
6383	Regions/clus1	6088	11346	0		5.7293
6384	Regions/clus1	6168	11346	0		7.44273
6449	Regions/clus1	3608	11266	0		5.7637
6450	Regions/clus1	3688	11266	0		5.50257
6451	Regions/clus1	3768	11266	0		5.33963
6474	Regions/clus1	5608	11266	0		6.71433
6476	Regions/clus1	5768	11266	0		7.88123
6477	Regions/clus1	5848	11266	0		8.50363
6478	Regions/clus1	5928	11266	0		8.49341
6479	Regions/clus1	6008	11266	0		6.47782
6570	Regions/clus1	5848	11186	0		16.4428
6697	Regions/clus1	3288	11026	0		4.38377
7410	Regions/clus1	28328	16066	0		14.5519
7411	Regions/clus1	28408	16066	0		15.1317
7412	Regions/clus1	28488	16066	0		11.1823
7480	Regions/clus1	28328	15986	0		16.5171
7484	Regions/clus1	28648	15986	0		11.5632
7548	Regions/clus1	27928	15906	0		13.1789
7549	Regions/clus1	28008	15906	0		15.9234
7550	Regions/clus1	28088	15906	0		16.9354
7551	Regions/clus1	28168	15906	0		14.676
7552	Regions/clus1	28248	15906	0		15.5475
7553	Regions/clus1	28328	15906	0		18.2105
7558	Regions/clus1	28728	15906	0		13.8907
7620	Regions/clus1	27528	15826	0		11.4754
7621	Regions/clus1	27608	15826	0		13.0268
7622	Regions/clus1	27688	15826	0		13.1784
7636	Regions/clus1	28808	15826	0		16.2881
7643	Regions/clus1	30648	15826	0		12.2613
7644	Regions/clus1	30728	15826	0		15.7583
7645	Regions/clus1	30808	15826	0		15.3082
7646	Regions/clus1	30888	15826	0		17.6361
7701	Regions/clus1	27448	15746	0		13.3508
7719	Regions/clus1	28888	15746	0		13.2486
7721	Regions/clus1	29048	15746	0		13.6837
7731	Regions/clus1	30808	15746	0		17.1895
7732	Regions/clus1	30888	15746	0		18.1722
7733	Regions/clus1	30968	15746	0		15.8416
7734	Regions/clus1	31048	15746	0		12.3609
7784	Regions/clus1	27048	15666	0		11.4601
7785	Regions/clus1	27128	15666	0		11.2975
7812	Regions/clus1	29288	15666	0		9.81761
7813	Regions/clus1	29368	15666	0		9.38464
7825	Regions/clus1	31128	15666	0		12.6009
7826	Regions/clus1	31208	15666	0		13.2664
7827	Regions/clus1	31288	15666	0		13.3306
7828	Regions/clus1	31368	15666	0		14.8542
7830	Regions/clus1	31528	15666	0		11.3755
7831	Regions/clus1	31608	15666	0		10.6676
7874	Regions/clus1	26888	15586	0		10.0201
7875	Regions/clus1	26968	15586	0		10.1021
7885	Regions/clus1	27768	15586	0		12.747
7905	Regions/clus1	29368	15586	0		11.716
7906	Regions/clus1	29448	15586	0		11.1149
7908	Regions/clus1	30088	15586	0		11.0918
7909	Regions/clus1	30168	15586	0		9.4175
7924	Regions/clus1	31368	15586	0		13.2374
7925	Regions/clus1	31448	15586	0		13.1003
7926	Regions/clus1	31528	15586	0		10.4441
7927	Regions/clus1	31608	15586	0		9.97482
7928	Regions/clus1	31688	15586	0		10.8012
7930	Regions/clus1	31848	15586	0		8.68156
7971	Regions/clus1	26808	15506	0		11.0233
7972	Regions/clus1	26888	15506	0		12.9075
7979	Regions/clus1	27448	15506	0		10.7939
7980	Regions/clus1	27528	15506	0		14.3128
7981	Regions/clus1	27608	15506	0		13.3802
7982	Regions/clus1	27688	15506	0		14.2666
7983	Regions/clus1	27768	15506	0		12.1959
7984	Regions/clus1	27848	15506	0		11.6624
8007	Regions/clus1	29928	15506	0		9.62299
8015	Regions/clus1	30568	15506	0		15.0949
8016	Regions/clus1	30648	15506	0		13.8551
8017	Regions/clus1	30728	15506	0		14.7755
8029	Regions/clus1	31688	15506	0		10.0527
8030	Regions/clus1	31768	15506	0		10.785
8031	Regions/clus1	31848	15506	0		8.96955
8032	Regions/clus1	31928	15506	0		10.9398
8033	Regions/clus1	32008	15506	0		9.06016
8070	Regions/clus1	26488	15426	0		9.69912
8071	Regions/clus1	26568	15426	0		10.4273
8072	Regions/clus1	26648	15426	0		10.1397
8073	Regions/clus1	26728	15426	0		9.07924
8074	Regions/clus1	26808	15426	0		11.6773
8082	Regions/clus1	27448	15426	0		12.7013
8083	Regions/clus1	27528	15426	0		12.5252
8086	Regions/clus1	27768	15426	0		12.5287
8097	Regions/clus1	28648	15426	0		14.3177
8098	Regions/clus1	28728	15426	0		14.4579
8099	Regions/clus1	28808	15426	0		12.4883
8107	Regions/clus1	29448	15426	0		12.4998
8108	Regions/clus1	29528	15426	0		11.8659
8109	Regions/clus1	29608	15426	0		11.4431
8110	Regions/clus1	29688	15426	0		14.4643
8119	Regions/clus1	30408	15426	0		12.8525
8120	Regions/clus1	30488	15426	0		13.3828
8122	Regions/clus1	30648	15426	0		12.4287
8128	Regions/clus1	31128	15426	0		12.3743
8137	Regions/clus1	31848	15426	0		10.7932
8138	Regions/clus1	31928	15426	0		9.55945
8139	Regions/clus1	32008	15426	0		10.5888
8179	Regions/clus1	26488	15346	0		8.57311
8180	Regions/clus1	26568	15346	0		11.2269
8190	Regions/clus1	27368	15346	0		11.7702
8191	Regions/clus1	27448	15346	0		12.8159
8192	Regions/clus1	27528	15346	0		13.4389
8193	Regions/clus1	27608	15346	0		11.3269
8194	Regions/clus1	27688	15346	0		12.494
8195	Regions/clus1	27768	15346	0		11.8598
8205	Regions/clus1	28568	15346	0		10.7811
8208	Regions/clus1	28808	15346	0		12.4065
8227	Regions/clus1	30328	15346	0		13.2115
8228	Regions/clus1	30408	15346	0		10.3629
8236	Regions/clus1	31048	15346	0		12.7044
8237	Regions/clus1	31128	15346	0		12.5043
8238	Regions/clus1	31208	15346	0		11.2915
8240	Regions/clus1	31368	15346	0		9.42069
8241	Regions/clus1	31448	15346	0		13.0433
8242	Regions/clus1	31528	15346	0		11.9184
8248	Regions/clus1	32008	15346	0		8.89026
8249	Regions/clus1	32088	15346	0		10.3184
8250	Regions/clus1	32168	15346	0		10.2108
8251	Regions/clus1	32248	15346	0		7.62959
8289	Regions/clus1	26408	15266	0		10.4498
8290	Regions/clus1	26488	15266	0		10.5316
8301	Regions/clus1	27368	15266	0		9.87555
8302	Regions/clus1	27448	15266	0		10.8734
8303	Regions/clus1	27528	15266	0		13.7982
8304	Regions/clus1	27608	15266	0		15.3103
8305	Regions/clus1	27688	15266	0		13.9044
8318	Regions/clus1	28728	15266	0		11.5269
8340	Regions/clus1	30488	15266	0		10.5935
8348	Regions/clus1	31128	15266	0		12.9503
8353	Regions/clus1	31528	15266	0		10.596
8354	Regions/clus1	31608	15266	0		11.7782
8355	Regions/clus1	31688	15266	0		10.2007
8361	Regions/clus1	32168	15266	0		10.0511
8362	Regions/clus1	32248	15266	0		10.6229
8363	Regions/clus1	32328	15266	0		9.20487
8401	Regions/clus1	26328	15186	0		9.16422
8402	Regions/clus1	26408	15186	0		9.36827
8407	Regions/clus1	26808	15186	0		10.1827
8408	Regions/clus1	26888	15186	0		9.83425
8410	Regions/clus1	27048	15186	0		9.30164
8414	Regions/clus1	27368	15186	0		11.8671
8415	Regions/clus1	27448	15186	0		9.13504
8416	Regions/clus1	27528	15186	0		13.2169
8457	Regions/clus1	30808	15186	0		10.9606
8463	Regions/clus1	31288	15186	0		14.3863
8467	Regions/clus1	31608	15186	0		10.6978
8470	Regions/clus1	31848	15186	0		9.50972
8475	Regions/clus1	32248	15186	0		10.076
8476	Regions/clus1	32328	15186	0		9.72432
8477	Regions/clus1	32408	15186	0		8.97192
8478	Regions/clus1	32488	15186	0		7.18634
8514	Regions/clus1	26248	15106	0		9.81943
8515	Regions/clus1	26328	15106	0		9.50153
8522	Regions/clus1	26888	15106	0		8.53186
8523	Regions/clus1	26968	15106	0		9.61374
8524	Regions/clus1	27048	15106	0		11.4018
8526	Regions/clus1	27208	15106	0		9.98966
8529	Regions/clus1	27448	15106	0		12.6551
8530	Regions/clus1	27528	15106	0		15.4213
8544	Regions/clus1	28648	15106	0		11.6951
8545	Regions/clus1	28728	15106	0		10.468
8572	Regions/clus1	30888	15106	0		10.0665
8578	Regions/clus1	31368	15106	0		10.0905
8580	Regions/clus1	31528	15106	0		11.6252
8581	Regions/clus1	31608	15106	0		10.2031
8582	Regions/clus1	31688	15106	0		10.2566
8590	Regions/clus1	32328	15106	0		8.86038
8591	Regions/clus1	32408	15106	0		7.20837
8627	Regions/clus1	26008	15026	0		8.67405
8629	Regions/clus1	26168	15026	0		8.59785
8630	Regions/clus1	26248	15026	0		7.65296
8636	Regions/clus1	26728	15026	0		9.9002
8637	Regions/clus1	26808	15026	0		9.01205
8638	Regions/clus1	26888	15026	0		9.51281
8640	Regions/clus1	27048	15026	0		9.25542
8644	Regions/clus1	27368	15026	0		11.2616
8645	Regions/clus1	27448	15026	0		10.7946
8646	Regions/clus1	27528	15026	0		9.89086
8671	Regions/clus1	29528	15026	0		9.00748
8688	Regions/clus1	30888	15026	0		11.032
8691	Regions/clus1	31128	15026	0		11.0374
8694	Regions/clus1	31368	15026	0		10.1111
8700	Regions/clus1	31848	15026	0		10.6557
8701	Regions/clus1	31928	15026	0		11.1208
8703	Regions/clus1	32088	15026	0		9.44575
8706	Regions/clus1	32328	15026	0		8.64785
8707	Regions/clus1	32408	15026	0		8.59337
8708	Regions/clus1	32488	15026	0		9.28903
8709	Regions/clus1	32568	15026	0		7.29056
8744	Regions/clus1	26008	14946	0		8.42644
8745	Regions/clus1	26088	14946	0		9.35505
8746	Regions/clus1	26168	14946	0		7.96042
8750	Regions/clus1	26488	14946	0		9.20391
8754	Regions/clus1	26808	14946	0		9.90681
8755	Regions/clus1	26888	14946	0		9.87946
8756	Regions/clus1	26968	14946	0		11.1786
8758	Regions/clus1	27128	14946	0		10.0143
8762	Regions/clus1	27448	14946	0		8.84633
8776	Regions/clus1	28568	14946	0		13.3626
8780	Regions/clus1	28888	14946	0		10.931
8781	Regions/clus1	28968	14946	0		11.1724
8782	Regions/clus1	29048	14946	0		10.8651
8790	Regions/clus1	29688	14946	0		8.77313
8791	Regions/clus1	29768	14946	0		10.5587
8792	Regions/clus1	29848	14946	0		9.90261
8794	Regions/clus1	30008	14946	0		10.1931
8805	Regions/clus1	30888	14946	0		8.85274
8808	Regions/clus1	31128	14946	0		11.7993
8810	Regions/clus1	31288	14946	0		10.1802
8811	Regions/clus1	31368	14946	0		9.77929
8817	Regions/clus1	31848	14946	0		9.50552
8820	Regions/clus1	32088	14946	0		11.0986
8824	Regions/clus1	32408	14946	0		10.9427
8825	Regions/clus1	32488	14946	0		7.95613
8826	Regions/clus1	32568	14946	0		7.64013
8862	Regions/clus1	26008	14866	0		10.2919
8866	Regions/clus1	26328	14866	0		9.72308
8867	Regions/clus1	26408	14866	0		10.0151
8871	Regions/clus1	26728	14866	0		9.46249
8872	Regions/clus1	26808	14866	0		10.3426
8873	Regions/clus1	26888	14866	0		10.2735
8877	Regions/clus1	27208	14866	0		10.9619
8879	Regions/clus1	27368	14866	0		9.501
8888	Regions/clus1	28088	14866	0		13.3675
8889	Regions/clus1	28168	14866	0		10.7859
8890	Regions/clus1	28248	14866	0		13.5853
8891	Regions/clus1	28328	14866	0		8.3257
8892	Regions/clus1	28408	14866	0		9.52973
8893	Regions/clus1	28488	14866	0		13.1132
8894	Regions/clus1	28568	14866	0		10.5235
8895	Regions/clus1	28648	14866	0		9.06895
8896	Regions/clus1	28728	14866	0		11.1459
8900	Regions/clus1	29048	14866	0		10.7074
8909	Regions/clus1	29768	14866	0		8.60277
8910	Regions/clus1	29848	14866	0		9.97556
8911	Regions/clus1	29928	14866	0		9.78795
8912	Regions/clus1	30008	14866	0		9.21178
8913	Regions/clus1	30088	14866	0		10.0767
8914	Regions/clus1	30168	14866	0		9.55283
8931	Regions/clus1	31528	14866	0		10.153
8940	Regions/clus1	32248	14866	0		8.90458
8941	Regions/clus1	32328	14866	0		9.33327
8943	Regions/clus1	32488	14866	0		8.71295
8944	Regions/clus1	32568	14866	0		8.49336
8945	Regions/clus1	32648	14866	0		6.56178
8978	Regions/clus1	25848	14786	0		8.61922
8979	Regions/clus1	25928	14786	0		9.39448
8980	Regions/clus1	26008	14786	0		9.90173
8984	Regions/clus1	26328	14786	0		10.4349
8985	Regions/clus1	26408	14786	0		9.20999
8986	Regions/clus1	26488	14786	0		10.4524
8989	Regions/clus1	26728	14786	0		9.24474
8990	Regions/clus1	26808	14786	0		10.41
8992	Regions/clus1	26968	14786	0		10.6262
8994	Regions/clus1	27128	14786	0		9.9425
8995	Regions/clus1	27208	14786	0		14.4273
9008	Regions/clus1	28248	14786	0		9.59924
9009	Regions/clus1	28328	14786	0		10.5598
9010	Regions/clus1	28408	14786	0		13.2349
9011	Regions/clus1	28488	14786	0		12.4648
9012	Regions/clus1	28568	14786	0		10.3219
9013	Regions/clus1	28648	14786	0		12.1598
9018	Regions/clus1	29048	14786	0		9.52545
9020	Regions/clus1	29208	14786	0		9.89922
9021	Regions/clus1	29288	14786	0		11.3596
9023	Regions/clus1	29448	14786	0		8.34714
9028	Regions/clus1	29848	14786	0		8.457
9029	Regions/clus1	29928	14786	0		7.93835
9030	Regions/clus1	30008	14786	0		8.49267
9031	Regions/clus1	30088	14786	0		8.01074
9033	Regions/clus1	30248	14786	0		11.201
9034	Regions/clus1	30328	14786	0		9.18355
9051	Regions/clus1	31688	14786	0		11.729
9052	Regions/clus1	31768	14786	0		9.88214
9056	Regions/clus1	32088	14786	0		11.346
9057	Regions/clus1	32168	14786	0		10.2002
9062	Regions/clus1	32568	14786	0		9.15252
9063	Regions/clus1	32648	14786	0		7.69996
9098	Regions/clus1	25928	14706	0		9.09331
9111	Regions/clus1	26968	14706	0		13.3851
9113	Regions/clus1	27128	14706	0		11.877
9114	Regions/clus1	27208	14706	0		11.9762
9125	Regions/clus1	28088	14706	0		12.4448
9126	Regions/clus1	28168	14706	0		11.0255
9127	Regions/clus1	28248	14706	0		12.1738
9128	Regions/clus1	28328	14706	0		10.5007
9129	Regions/clus1	28408	14706	0		10.1844
9130	Regions/clus1	28488	14706	0		10.1478
9131	Regions/clus1	28568	14706	0		8.17632
9132	Regions/clus1	28648	14706	0		8.5026
9137	Regions/clus1	29048	14706	0		8.2178
9140	Regions/clus1	29288	14706	0		9.5151
9141	Regions/clus1	29368	14706	0		9.04415
9147	Regions/clus1	29848	14706	0		8.2731
9148	Regions/clus1	29928	14706	0		7.71774
9149	Regions/clus1	30008	14706	0		9.39224
9150	Regions/clus1	30088	14706	0		8.49787
9151	Regions/clus1	30168	14706	0		9.578
9152	Regions/clus1	30248	14706	0		8.73701
9153	Regions/clus1	30328	14706	0		7.88174
9154	Regions/clus1	30408	14706	0		8.17793
9167	Regions/clus1	31448	14706	0		8.65605
9168	Regions/clus1	31528	14706	0		11.5933
9170	Regions/clus1	31688	14706	0		10.5564
9171	Regions/clus1	31768	14706	0		9.5143
9174	Regions/clus1	32008	14706	0		10.2153
9178	Regions/clus1	32328	14706	0		8.65592
9179	Regions/clus1	32408	14706	0		10.0212
9181	Regions/clus1	32568	14706	0		9.88089
9182	Regions/clus1	32648	14706	0		8.22215
9183	Regions/clus1	32728	14706	0		7.76937
9215	Regions/clus1	25768	14626	0		9.91616
9216	Regions/clus1	25848	14626	0		10.1387
9219	Regions/clus1	26088	14626	0		7.52105
9220	Regions/clus1	26168	14626	0		9.34383
9227	Regions/clus1	26728	14626	0		10.5752
9233	Regions/clus1	27208	14626	0		9.67914
9244	Regions/clus1	28088	14626	0		11.2958
9245	Regions/clus1	28168	14626	0		7.89477
9247	Regions/clus1	28328	14626	0		11.7518
9249	Regions/clus1	28488	14626	0		10.3405
9250	Regions/clus1	28568	14626	0		11.1577
9251	Regions/clus1	28648	14626	0		9.69354
9252	Regions/clus1	28728	14626	0		11.5687
9255	Regions/clus1	28968	14626	0		10.4117
9262	Regions/clus1	29528	14626	0		8.34183
9266	Regions/clus1	29848	14626	0		6.90291
9267	Regions/clus1	29928	14626	0		8.50569
9268	Regions/clus1	30008	14626	0		9.35901
9271	Regions/clus1	30248	14626	0		9.3753
9273	Regions/clus1	30408	14626	0		8.42623
9277	Regions/clus1	30728	14626	0		7.7681
9284	Regions/clus1	31288	14626	0		11.335
9291	Regions/clus1	31848	14626	0		10.8057
9293	Regions/clus1	32008	14626	0		9.55131
9301	Regions/clus1	32648	14626	0		9.08578
9302	Regions/clus1	32728	14626	0		8.12957
9334	Regions/clus1	25768	14546	0		8.17304
9343	Regions/clus1	26488	14546	0		9.86476
9363	Regions/clus1	28088	14546	0		10.6367
9365	Regions/clus1	28248	14546	0		11.0003
9366	Regions/clus1	28328	14546	0		12.9221
9367	Regions/clus1	28408	14546	0		10.6983
9368	Regions/clus1	28488	14546	0		10.684
9369	Regions/clus1	28568	14546	0		10.2471
9370	Regions/clus1	28648	14546	0		9.4899
9383	Regions/clus1	29688	14546	0		8.53068
9384	Regions/clus1	29768	14546	0		8.94728
9385	Regions/clus1	29848	14546	0		7.75769
9386	Regions/clus1	29928	14546	0		7.3905
9389	Regions/clus1	30168	14546	0		7.73688
9390	Regions/clus1	30248	14546	0		10.4017
9391	Regions/clus1	30328	14546	0		7.2595
9392	Regions/clus1	30408	14546	0		6.93151
9393	Regions/clus1	30488	14546	0		7.93934
9394	Regions/clus1	30568	14546	0		8.96673
9421	Regions/clus1	32728	14546	0		7.70403
9452	Regions/clus1	25688	14466	0		8.02136
9453	Regions/clus1	25768	14466	0		8.66541
9458	Regions/clus1	26168	14466	0		9.74006
9479	Regions/clus1	27848	14466	0		12.8981
9483	Regions/clus1	28168	14466	0		11.8142
9484	Regions/clus1	28248	14466	0		11.5305
9486	Regions/clus1	28408	14466	0		10.5926
9487	Regions/clus1	28488	14466	0		8.66777
9488	Regions/clus1	28568	14466	0		10.3039
9489	Regions/clus1	28648	14466	0		8.48049
9490	Regions/clus1	28728	14466	0		10.0368
9504	Regions/clus1	29848	14466	0		7.6333
9505	Regions/clus1	29928	14466	0		8.38229
9507	Regions/clus1	30088	14466	0		8.04179
9508	Regions/clus1	30168	14466	0		9.15633
9509	Regions/clus1	30248	14466	0		8.89184
9511	Regions/clus1	30408	14466	0		10.6247
9513	Regions/clus1	30568	14466	0		8.87392
9524	Regions/clus1	31448	14466	0		7.84068
9525	Regions/clus1	31528	14466	0		12.1211
9526	Regions/clus1	31608	14466	0		9.91924
9527	Regions/clus1	31688	14466	0		11.9101
9541	Regions/clus1	32808	14466	0		7.77722
9573	Regions/clus1	25688	14386	0		8.08788
9574	Regions/clus1	25768	14386	0		12.0673
9575	Regions/clus1	25848	14386	0		8.32428
9578	Regions/clus1	26088	14386	0		9.23996
9581	Regions/clus1	26328	14386	0		8.27571
9582	Regions/clus1	26408	14386	0		8.53511
9583	Regions/clus1	26488	14386	0		8.80582
9599	Regions/clus1	27768	14386	0		11.5775
9602	Regions/clus1	28008	14386	0		12.0227
9603	Regions/clus1	28088	14386	0		12.5711
9604	Regions/clus1	28168	14386	0		12.0572
9605	Regions/clus1	28248	14386	0		10.8142
9609	Regions/clus1	28568	14386	0		9.459
9610	Regions/clus1	28648	14386	0		10.926
9611	Regions/clus1	28728	14386	0		9.5112
9625	Regions/clus1	29848	14386	0		9.49646
9630	Regions/clus1	30248	14386	0		6.48422
9631	Regions/clus1	30328	14386	0		7.66181
9645	Regions/clus1	31448	14386	0		9.97533
9650	Regions/clus1	31848	14386	0		10.1693
9655	Regions/clus1	32248	14386	0		9.58647
9657	Regions/clus1	32408	14386	0		8.60089
9663	Regions/clus1	32888	14386	0		8.16328
9694	Regions/clus1	25688	14306	0		9.11261
9696	Regions/clus1	25848	14306	0		6.81608
9697	Regions/clus1	25928	14306	0		8.59799
9700	Regions/clus1	26168	14306	0		8.47997
9703	Regions/clus1	26408	14306	0		9.38431
9705	Regions/clus1	26568	14306	0		10.8881
9724	Regions/clus1	28088	14306	0		10.4262
9725	Regions/clus1	28168	14306	0		10.6376
9726	Regions/clus1	28248	14306	0		11.1296
9727	Regions/clus1	28328	14306	0		10.9524
9731	Regions/clus1	28648	14306	0		9.88221
9746	Regions/clus1	29848	14306	0		9.25664
9747	Regions/clus1	29928	14306	0		7.24221
9750	Regions/clus1	30168	14306	0		9.29823
9751	Regions/clus1	30248	14306	0		8.49802
9752	Regions/clus1	30328	14306	0		8.38173
9755	Regions/clus1	30568	14306	0		8.36579
9765	Regions/clus1	31368	14306	0		10.7975
9766	Regions/clus1	31448	14306	0		9.12365
9769	Regions/clus1	31688	14306	0		10.6618
9772	Regions/clus1	31928	14306	0		8.7159
9773	Regions/clus1	32008	14306	0		8.66503
9776	Regions/clus1	32248	14306	0		8.02753
9784	Regions/clus1	32888	14306	0		7.2324
9785	Regions/clus1	32968	14306	0		7.32813
9814	Regions/clus1	25608	14226	0		9.43149
9815	Regions/clus1	25688	14226	0		10.6218
9823	Regions/clus1	26328	14226	0		8.63804
9824	Regions/clus1	26408	14226	0		9.59565
9826	Regions/clus1	26568	14226	0		9.70196
9842	Regions/clus1	27848	14226	0		10.4818
9845	Regions/clus1	28088	14226	0		10.3138
9846	Regions/clus1	28168	14226	0		10.8335
9847	Regions/clus1	28248	14226	0		9.16344
9848	Regions/clus1	28328	14226	0		10.0165
9849	Regions/clus1	28408	14226	0		8.45611
9850	Regions/clus1	28488	14226	0		10.4889
9851	Regions/clus1	28568	14226	0		10.1389
9852	Regions/clus1	28648	14226	0		9.82007
9853	Regions/clus1	28728	14226	0		10.2046
9854	Regions/clus1	28808	14226	0		9.45378
9867	Regions/clus1	29848	14226	0		9.40161
9868	Regions/clus1	29928	14226	0		8.03859
9872	Regions/clus1	30248	14226	0		8.01624
9873	Regions/clus1	30328	14226	0		9.32537
9874	Regions/clus1	30408	14226	0		9.5258
9875	Regions/clus1	30488	14226	0		9.90317
9878	Regions/clus1	30728	14226	0		8.6568
9887	Regions/clus1	31448	14226	0		9.58754
9888	Regions/clus1	31528	14226	0		11.1023
9890	Regions/clus1	31688	14226	0		10.4185
9893	Regions/clus1	31928	14226	0		9.98501
9896	Regions/clus1	32168	14226	0		9.16467
9906	Regions/clus1	32968	14226	0		7.56602
9937	Regions/clus1	25688	14146	0		7.85399
9949	Regions/clus1	26648	14146	0		8.5356
9960	Regions/clus1	27528	14146	0		9.2516
9964	Regions/clus1	27848	14146	0		9.92957
9965	Regions/clus1	27928	14146	0		9.95502
9967	Regions/clus1	28088	14146	0		11.3387
9968	Regions/clus1	28168	14146	0		10.2297
9969	Regions/clus1	28248	14146	0		9.5668
9970	Regions/clus1	28328	14146	0		9.42668
9971	Regions/clus1	28408	14146	0		9.14024
9972	Regions/clus1	28488	14146	0		9.53847
9974	Regions/clus1	28648	14146	0		9.16057
9975	Regions/clus1	28728	14146	0		8.70312
9976	Regions/clus1	28808	14146	0		8.52859
9988	Regions/clus1	29768	14146	0		9.06415
9989	Regions/clus1	29848	14146	0		8.74276
9990	Regions/clus1	29928	14146	0		9.19043
9991	Regions/clus1	30008	14146	0		9.79278
9992	Regions/clus1	30088	14146	0		7.32171
9993	Regions/clus1	30168	14146	0		8.57133
9994	Regions/clus1	30248	14146	0		8.47874
9995	Regions/clus1	30328	14146	0		9.61202
9996	Regions/clus1	30408	14146	0		7.13075
9998	Regions/clus1	30568	14146	0		8.8944
10000	Regions/clus1	30728	14146	0		8.07775
10008	Regions/clus1	31368	14146	0		9.16579
10009	Regions/clus1	31448	14146	0		9.77122
10011	Regions/clus1	31608	14146	0		8.68205
10014	Regions/clus1	31848	14146	0		10.6659
10015	Regions/clus1	31928	14146	0		10.6593
10017	Regions/clus1	32088	14146	0		9.40029
10022	Regions/clus1	32488	14146	0		9.13633
10028	Regions/clus1	32968	14146	0		7.38045
10057	Regions/clus1	25528	14066	0		8.02298
10072	Regions/clus1	26728	14066	0		8.35168
10073	Regions/clus1	26808	14066	0		10.859
10081	Regions/clus1	27448	14066	0		9.40342
10085	Regions/clus1	27768	14066	0		10.9397
10089	Regions/clus1	28088	14066	0		10.6528
10090	Regions/clus1	28168	14066	0		11.8639
10091	Regions/clus1	28248	14066	0		9.88795
10092	Regions/clus1	28328	14066	0		10.1028
10094	Regions/clus1	28488	14066	0		8.92434
10095	Regions/clus1	28568	14066	0		9.09153
10096	Regions/clus1	28648	14066	0		9.58325
10097	Regions/clus1	28728	14066	0		9.27732
10098	Regions/clus1	28808	14066	0		10.1269
10099	Regions/clus1	28888	14066	0		9.35532
10110	Regions/clus1	29768	14066	0		9.14938
10111	Regions/clus1	29848	14066	0		8.18608
10112	Regions/clus1	29928	14066	0		7.9202
10115	Regions/clus1	30168	14066	0		9.36316
10116	Regions/clus1	30248	14066	0		7.68492
10117	Regions/clus1	30328	14066	0		6.59173
10118	Regions/clus1	30408	14066	0		8.31292
10119	Regions/clus1	30488	14066	0		9.4838
10123	Regions/clus1	30808	14066	0		8.81824
10132	Regions/clus1	31528	14066	0		7.48228
10133	Regions/clus1	31608	14066	0		10.9893
10135	Regions/clus1	31768	14066	0		9.92784
10136	Regions/clus1	31848	14066	0		8.0995
10137	Regions/clus1	31928	14066	0		9.19559
10140	Regions/clus1	32168	14066	0		9.01429
10141	Regions/clus1	32248	14066	0		9.64374
10150	Regions/clus1	32968	14066	0		7.29076
10180	Regions/clus1	25528	13986	0		7.85228
10189	Regions/clus1	26248	13986	0		10.6943
10191	Regions/clus1	26408	13986	0		9.16878
10193	Regions/clus1	26568	13986	0		9.78382
10197	Regions/clus1	26888	13986	0		11.5359
10198	Regions/clus1	26968	13986	0		11.7505
10206	Regions/clus1	27608	13986	0		10.9186
10209	Regions/clus1	27848	13986	0		10.0408
10213	Regions/clus1	28168	13986	0		10.6789
10214	Regions/clus1	28248	13986	0		8.151
10215	Regions/clus1	28328	13986	0		9.2889
10216	Regions/clus1	28408	13986	0		8.24569
10217	Regions/clus1	28488	13986	0		10.1364
10218	Regions/clus1	28568	13986	0		9.52838
10219	Regions/clus1	28648	13986	0		8.53164
10220	Regions/clus1	28728	13986	0		11.5389
10221	Regions/clus1	28808	13986	0		9.42578
10222	Regions/clus1	28888	13986	0		8.56589
10223	Regions/clus1	28968	13986	0		8.70319
10224	Regions/clus1	29048	13986	0		8.62608
10232	Regions/clus1	29688	13986	0		9.13085
10233	Regions/clus1	29768	13986	0		8.71447
10234	Regions/clus1	29848	13986	0		8.24745
10236	Regions/clus1	30008	13986	0		8.20822
10237	Regions/clus1	30088	13986	0		8.66079
10238	Regions/clus1	30168	13986	0		9.02812
10239	Regions/clus1	30248	13986	0		8.06972
10240	Regions/clus1	30328	13986	0		9.3987
10241	Regions/clus1	30408	13986	0		8.38856
10243	Regions/clus1	30568	13986	0		10.0776
10245	Regions/clus1	30728	13986	0		7.44414
10247	Regions/clus1	30888	13986	0		8.57195
10253	Regions/clus1	31368	13986	0		12.0075
10255	Regions/clus1	31528	13986	0		9.18684
10256	Regions/clus1	31608	13986	0		9.89779
10257	Regions/clus1	31688	13986	0		9.72734
10258	Regions/clus1	31768	13986	0		9.71165
10273	Regions/clus1	32968	13986	0		7.28822
10303	Regions/clus1	25528	13906	0		7.2493
10312	Regions/clus1	26248	13906	0		10.4998
10319	Regions/clus1	26808	13906	0		10.6065
10320	Regions/clus1	26888	13906	0		11.889
10321	Regions/clus1	26968	13906	0		10.3131
10335	Regions/clus1	28088	13906	0		11.3594
10336	Regions/clus1	28168	13906	0		10.2937
10337	Regions/clus1	28248	13906	0		9.59984
10338	Regions/clus1	28328	13906	0		8.83307
10340	Regions/clus1	28488	13906	0		9.78407
10341	Regions/clus1	28568	13906	0		9.30382
10345	Regions/clus1	28888	13906	0		8.75457
10346	Regions/clus1	28968	13906	0		8.63481
10347	Regions/clus1	29048	13906	0		8.64976
10348	Regions/clus1	29128	13906	0		9.18735
10353	Regions/clus1	29528	13906	0		9.83597
10354	Regions/clus1	29608	13906	0		7.84088
10355	Regions/clus1	29688	13906	0		8.46425
10358	Regions/clus1	29928	13906	0		7.64293
10359	Regions/clus1	30008	13906	0		8.82569
10360	Regions/clus1	30088	13906	0		10.459
10361	Regions/clus1	30168	13906	0		8.36019
10363	Regions/clus1	30328	13906	0		7.94015
10364	Regions/clus1	30408	13906	0		11.3748
10365	Regions/clus1	30488	13906	0		9.76832
10367	Regions/clus1	30648	13906	0		9.19746
10381	Regions/clus1	31768	13906	0		6.99707
10382	Regions/clus1	31848	13906	0		8.09622
10386	Regions/clus1	32168	13906	0		9.26063
10387	Regions/clus1	32248	13906	0		8.37464
10388	Regions/clus1	32328	13906	0		9.35129
10426	Regions/clus1	25448	13826	0		8.37951
10427	Regions/clus1	25528	13826	0		7.00449
10439	Regions/clus1	26488	13826	0		9.55335
10440	Regions/clus1	26568	13826	0		11.1155
10442	Regions/clus1	26728	13826	0		11.6295
10443	Regions/clus1	26808	13826	0		8.54218
10445	Regions/clus1	26968	13826	0		9.78049
10454	Regions/clus1	27688	13826	0		11.0291
10458	Regions/clus1	28008	13826	0		9.90407
10460	Regions/clus1	28168	13826	0		9.99886
10461	Regions/clus1	28248	13826	0		8.8028
10462	Regions/clus1	28328	13826	0		10.0584
10463	Regions/clus1	28408	13826	0		10.381
10464	Regions/clus1	28488	13826	0		10.0824
10465	Regions/clus1	28568	13826	0		10.3177
10466	Regions/clus1	28648	13826	0		11.0572
10477	Regions/clus1	29528	13826	0		10.1007
10478	Regions/clus1	29608	13826	0		8.6582
10483	Regions/clus1	30008	13826	0		9.82645
10484	Regions/clus1	30088	13826	0		9.25345
10485	Regions/clus1	30168	13826	0		7.70526
10486	Regions/clus1	30248	13826	0		9.03471
10487	Regions/clus1	30328	13826	0		7.79454
10488	Regions/clus1	30408	13826	0		9.18482
10489	Regions/clus1	30488	13826	0		8.76202
10490	Regions/clus1	30568	13826	0		8.08756
10493	Regions/clus1	30808	13826	0		8.86067
10501	Regions/clus1	31448	13826	0		8.76245
10502	Regions/clus1	31528	13826	0		8.22132
10503	Regions/clus1	31608	13826	0		7.74901
10504	Regions/clus1	31688	13826	0		8.96608
10508	Regions/clus1	32008	13826	0		9.31962
10510	Regions/clus1	32168	13826	0		7.81834
10520	Regions/clus1	32968	13826	0		8.59643
10560	Regions/clus1	26248	13746	0		8.11512
10563	Regions/clus1	26488	13746	0		10.4529
10566	Regions/clus1	26728	13746	0		9.21685
10567	Regions/clus1	26808	13746	0		8.98605
10568	Regions/clus1	26888	13746	0		7.59538
10582	Regions/clus1	28008	13746	0		10.661
10583	Regions/clus1	28088	13746	0		11.6758
10584	Regions/clus1	28168	13746	0		9.09352
10585	Regions/clus1	28248	13746	0		9.8461
10586	Regions/clus1	28328	13746	0		9.21628
10587	Regions/clus1	28408	13746	0		10.412
10588	Regions/clus1	28488	13746	0		8.14037
10589	Regions/clus1	28568	13746	0		10.3819
10591	Regions/clus1	28728	13746	0		9.55522
10608	Regions/clus1	30088	13746	0		7.47986
10609	Regions/clus1	30168	13746	0		9.62697
10610	Regions/clus1	30248	13746	0		8.48933
10611	Regions/clus1	30328	13746	0		9.8938
10612	Regions/clus1	30408	13746	0		7.83189
10613	Regions/clus1	30488	13746	0		9.31706
10614	Regions/clus1	30568	13746	0		10.7801
10615	Regions/clus1	30648	13746	0		8.40144
10616	Regions/clus1	30728	13746	0		8.69179
10625	Regions/clus1	31448	13746	0		8.60584
10627	Regions/clus1	31608	13746	0		6.91377
10628	Regions/clus1	31688	13746	0		8.49484
10629	Regions/clus1	31768	13746	0		9.40638
10644	Regions/clus1	32968	13746	0		8.19266
10674	Regions/clus1	25528	13666	0		8.40064
10683	Regions/clus1	26248	13666	0		12.0216
10684	Regions/clus1	26328	13666	0		11.0919
10685	Regions/clus1	26408	13666	0		11.4369
10689	Regions/clus1	26728	13666	0		9.93574
10691	Regions/clus1	26888	13666	0		10.7427
10692	Regions/clus1	26968	13666	0		11.648
10707	Regions/clus1	28168	13666	0		9.59141
10708	Regions/clus1	28248	13666	0		10.1098
10709	Regions/clus1	28328	13666	0		8.95075
10710	Regions/clus1	28408	13666	0		9.05923
10711	Regions/clus1	28488	13666	0		7.81214
10712	Regions/clus1	28568	13666	0		11.628
10714	Regions/clus1	28728	13666	0		10.4023
10715	Regions/clus1	28808	13666	0		9.3251
10716	Regions/clus1	28888	13666	0		9.09996
10730	Regions/clus1	30008	13666	0		8.74987
10733	Regions/clus1	30248	13666	0		7.69334
10735	Regions/clus1	30408	13666	0		7.10158
10736	Regions/clus1	30488	13666	0		9.23803
10740	Regions/clus1	30808	13666	0		9.09647
10749	Regions/clus1	31528	13666	0		8.29602
10750	Regions/clus1	31608	13666	0		9.09697
10754	Regions/clus1	31928	13666	0		7.43488
10796	Regions/clus1	25528	13586	0		8.24455
10802	Regions/clus1	26008	13586	0		11.5
10803	Regions/clus1	26088	13586	0		9.13303
10806	Regions/clus1	26328	13586	0		10.6145
10807	Regions/clus1	26408	13586	0		8.79453
10809	Regions/clus1	26568	13586	0		9.62279
10812	Regions/clus1	26808	13586	0		7.91373
10813	Regions/clus1	26888	13586	0		8.65456
10814	Regions/clus1	26968	13586	0		9.08764
10825	Regions/clus1	27848	13586	0		11.4611
10826	Regions/clus1	27928	13586	0		10.8728
10829	Regions/clus1	28168	13586	0		9.71059
10831	Regions/clus1	28328	13586	0		9.78615
10832	Regions/clus1	28408	13586	0		10.8148
10833	Regions/clus1	28488	13586	0		9.81902
10834	Regions/clus1	28568	13586	0		10.451
10835	Regions/clus1	28648	13586	0		9.51227
10836	Regions/clus1	28728	13586	0		9.5139
10837	Regions/clus1	28808	13586	0		8.97824
10839	Regions/clus1	28968	13586	0		10.5586
10840	Regions/clus1	29048	13586	0		10.3573
10847	Regions/clus1	29608	13586	0		7.27081
10848	Regions/clus1	29688	13586	0		10.1374
10849	Regions/clus1	29768	13586	0		8.75578
10850	Regions/clus1	29848	13586	0		8.65526
10851	Regions/clus1	29928	13586	0		8.58366
10852	Regions/clus1	30008	13586	0		7.57817
10853	Regions/clus1	30088	13586	0		8.97393
10854	Regions/clus1	30168	13586	0		7.71818
10856	Regions/clus1	30328	13586	0		8.67377
10857	Regions/clus1	30408	13586	0		8.12815
10860	Regions/clus1	30648	13586	0		9.14019
10861	Regions/clus1	30728	13586	0		9.45619
10872	Regions/clus1	31608	13586	0		7.49392
10873	Regions/clus1	31688	13586	0		8.24749
10874	Regions/clus1	31768	13586	0		8.71637
10924	Regions/clus1	26008	13506	0		9.78215
10925	Regions/clus1	26088	13506	0		8.62132
10928	Regions/clus1	26328	13506	0		7.95348
10929	Regions/clus1	26408	13506	0		8.47468
10930	Regions/clus1	26488	13506	0		9.7122
10932	Regions/clus1	26648	13506	0		7.58381
10937	Regions/clus1	27048	13506	0		8.77558
10949	Regions/clus1	28008	13506	0		9.15364
10950	Regions/clus1	28088	13506	0		10.6115
10951	Regions/clus1	28168	13506	0		10.1886
10952	Regions/clus1	28248	13506	0		11.4625
10955	Regions/clus1	28488	13506	0		9.60601
10956	Regions/clus1	28568	13506	0		9.60166
10957	Regions/clus1	28648	13506	0		8.8015
10958	Regions/clus1	28728	13506	0		8.05106
10959	Regions/clus1	28808	13506	0		9.49662
10960	Regions/clus1	28888	13506	0		8.79976
10961	Regions/clus1	28968	13506	0		11.8056
10962	Regions/clus1	29048	13506	0		8.97756
10969	Regions/clus1	29608	13506	0		8.09501
10970	Regions/clus1	29688	13506	0		7.65474
10971	Regions/clus1	29768	13506	0		8.33589
10975	Regions/clus1	30088	13506	0		8.48303
10976	Regions/clus1	30168	13506	0		7.86086
10979	Regions/clus1	30408	13506	0		9.53838
10980	Regions/clus1	30488	13506	0		7.31532
10983	Regions/clus1	30728	13506	0		8.34695
10994	Regions/clus1	31608	13506	0		7.23363
10998	Regions/clus1	31928	13506	0		10.0745
11052	Regions/clus1	26568	13426	0		7.01454
11058	Regions/clus1	27048	13426	0		7.6138
11072	Regions/clus1	28168	13426	0		9.65955
11074	Regions/clus1	28328	13426	0		10.5616
11075	Regions/clus1	28408	13426	0		10.499
11076	Regions/clus1	28488	13426	0		10.2146
11077	Regions/clus1	28568	13426	0		9.04597
11078	Regions/clus1	28648	13426	0		10.7125
11079	Regions/clus1	28728	13426	0		9.59942
11083	Regions/clus1	29048	13426	0		9.43027
11095	Regions/clus1	30008	13426	0		9.47964
11096	Regions/clus1	30088	13426	0		7.8972
11097	Regions/clus1	30168	13426	0		6.62165
11099	Regions/clus1	30328	13426	0		8.36065
11101	Regions/clus1	30488	13426	0		9.01432
11115	Regions/clus1	31608	13426	0		6.84666
11116	Regions/clus1	31688	13426	0		7.76354
11119	Regions/clus1	31928	13426	0		6.89288
11171	Regions/clus1	26488	13346	0		8.38572
11172	Regions/clus1	26568	13346	0		8.97618
11174	Regions/clus1	26728	13346	0		7.68607
11176	Regions/clus1	26888	13346	0		7.88103
11193	Regions/clus1	28248	13346	0		10.2157
11194	Regions/clus1	28328	13346	0		9.60388
11195	Regions/clus1	28408	13346	0		10.2382
11199	Regions/clus1	28728	13346	0		9.65999
11211	Regions/clus1	29688	13346	0		7.92464
11213	Regions/clus1	29848	13346	0		16.6123
11217	Regions/clus1	30168	13346	0		7.95257
11218	Regions/clus1	30248	13346	0		7.824
11219	Regions/clus1	30328	13346	0		6.87827
11220	Regions/clus1	30408	13346	0		9.12285
11222	Regions/clus1	30568	13346	0		8.02233
11234	Regions/clus1	31528	13346	0		9.03662
11235	Regions/clus1	31608	13346	0		7.00019
11290	Regions/clus1	26488	13266	0		7.63903
11291	Regions/clus1	26568	13266	0		7.09437
11293	Regions/clus1	26728	13266	0		8.07214
11294	Regions/clus1	26808	13266	0		10.162
11295	Regions/clus1	26888	13266	0		7.93347
11296	Regions/clus1	26968	13266	0		8.44347
11313	Regions/clus1	28328	13266	0		7.77548
11320	Regions/clus1	28888	13266	0		9.15424
11338	Regions/clus1	30328	13266	0		7.4297
11351	Regions/clus1	31368	13266	0		7.69082
11353	Regions/clus1	31528	13266	0		7.29291
11410	Regions/clus1	26568	13186	0		7.1196
11411	Regions/clus1	26648	13186	0		8.38822
11412	Regions/clus1	26728	13186	0		8.08182
11413	Regions/clus1	26808	13186	0		8.46246
11414	Regions/clus1	26888	13186	0		12.0485
11416	Regions/clus1	27048	13186	0		7.68397
11417	Regions/clus1	27128	13186	0		8.88894
11418	Regions/clus1	27208	13186	0		9.67104
11430	Regions/clus1	28168	13186	0		8.51728
11431	Regions/clus1	28248	13186	0		8.54061
11432	Regions/clus1	28328	13186	0		8.77186
11433	Regions/clus1	28408	13186	0		9.08415
11456	Regions/clus1	30248	13186	0		6.99161
11457	Regions/clus1	30328	13186	0		8.71317
11458	Regions/clus1	30408	13186	0		7.97216
11459	Regions/clus1	30488	13186	0		7.63935
11470	Regions/clus1	31368	13186	0		7.41755
11471	Regions/clus1	31448	13186	0		7.68242
11472	Regions/clus1	31528	13186	0		8.19524
11473	Regions/clus1	31608	13186	0		8.19178
11531	Regions/clus1	26808	13106	0		6.90424
11532	Regions/clus1	26888	13106	0		10.6825
11534	Regions/clus1	27048	13106	0		8.76504
11535	Regions/clus1	27128	13106	0		8.66768
11536	Regions/clus1	27208	13106	0		12.8998
11537	Regions/clus1	27288	13106	0		9.22943
11545	Regions/clus1	27928	13106	0		9.04752
11546	Regions/clus1	28008	13106	0		9.52829
11547	Regions/clus1	28088	13106	0		9.12509
11549	Regions/clus1	28248	13106	0		9.46585
11550	Regions/clus1	28328	13106	0		9.8717
11575	Regions/clus1	30328	13106	0		8.04133
11576	Regions/clus1	30408	13106	0		8.69252
11578	Regions/clus1	30568	13106	0		7.49937
11579	Regions/clus1	30648	13106	0		6.70895
11586	Regions/clus1	31208	13106	0		7.76342
11589	Regions/clus1	31448	13106	0		9.25101
11590	Regions/clus1	31528	13106	0		7.883
11649	Regions/clus1	26888	13026	0		8.66538
11650	Regions/clus1	26968	13026	0		8.86688
11651	Regions/clus1	27048	13026	0		9.21
11652	Regions/clus1	27128	13026	0		8.09357
11653	Regions/clus1	27208	13026	0		10.157
11655	Regions/clus1	27368	13026	0		10.5787
11656	Regions/clus1	27448	13026	0		7.69547
11662	Regions/clus1	27928	13026	0		8.57213
11663	Regions/clus1	28008	13026	0		6.65079
11664	Regions/clus1	28088	13026	0		8.11846
11666	Regions/clus1	28248	13026	0		8.04924
11697	Regions/clus1	30728	13026	0		7.799
11699	Regions/clus1	30888	13026	0		7.94806
11702	Regions/clus1	31128	13026	0		8.34907
11704	Regions/clus1	31288	13026	0		7.9715
11705	Regions/clus1	31368	13026	0		7.67746
11706	Regions/clus1	31448	13026	0		7.64805
11770	Regions/clus1	27208	12946	0		8.86212
11771	Regions/clus1	27288	12946	0		8.57578
11775	Regions/clus1	27608	12946	0		8.60231
11778	Regions/clus1	27848	12946	0		7.66789
11779	Regions/clus1	27928	12946	0		7.40844
11780	Regions/clus1	28008	12946	0		8.86163
11781	Regions/clus1	28088	12946	0		8.4345
11782	Regions/clus1	28168	12946	0		7.6776
11783	Regions/clus1	28248	12946	0		6.99421
11810	Regions/clus1	30408	12946	0		7.7175
11812	Regions/clus1	30568	12946	0		7.96899
11813	Regions/clus1	30648	12946	0		6.54987
11814	Regions/clus1	30728	12946	0		7.97604
11816	Regions/clus1	30888	12946	0		6.8684
11817	Regions/clus1	30968	12946	0		6.56275
11820	Regions/clus1	31208	12946	0		8.14087
11821	Regions/clus1	31288	12946	0		6.39324
11822	Regions/clus1	31368	12946	0		6.86926
11886	Regions/clus1	27288	12866	0		8.55106
11887	Regions/clus1	27368	12866	0		7.24282
11888	Regions/clus1	27448	12866	0		8.18232
11889	Regions/clus1	27528	12866	0		7.39948
11890	Regions/clus1	27608	12866	0		8.7138
11895	Regions/clus1	28008	12866	0		7.50997
11896	Regions/clus1	28088	12866	0		8.49971
11897	Regions/clus1	28168	12866	0		8.18375
11926	Regions/clus1	30488	12866	0		6.30142
11928	Regions/clus1	30648	12866	0		6.7422
11931	Regions/clus1	30888	12866	0		8.5245
11932	Regions/clus1	30968	12866	0		8.19024
11935	Regions/clus1	31208	12866	0		7.06235
11937	Regions/clus1	31368	12866	0		6.21982
12002	Regions/clus1	27368	12786	0		7.92579
[truncated: 5,539 more rows]

## Sheet: Figure S7B
spotId	raster	x	y	z	Date	N-Acetylaspartate/Aspartate
679	Regions/clus2	3928	15426	0		9.73413
680	Regions/clus2	4008	15426	0		8.61313
681	Regions/clus2	4088	15426	0		8.94571
758	Regions/clus2	3288	15346	0		9.08472
759	Regions/clus2	3368	15346	0		10.6315
760	Regions/clus2	3448	15346	0		9.16552
762	Regions/clus2	3608	15346	0		10.9878
763	Regions/clus2	3688	15346	0		8.98374
764	Regions/clus2	3768	15346	0		10.9407
766	Regions/clus2	3928	15346	0		8.59516
769	Regions/clus2	4168	15346	0		10.578
785	Regions/clus2	5448	15346	0		9.04868
786	Regions/clus2	5528	15346	0		9.22674
787	Regions/clus2	5608	15346	0		8.61718
788	Regions/clus2	5688	15346	0		6.88337
843	Regions/clus2	2968	15266	0		8.59355
844	Regions/clus2	3048	15266	0		10.358
845	Regions/clus2	3128	15266	0		10.2332
848	Regions/clus2	3368	15266	0		10.6885
849	Regions/clus2	3448	15266	0		9.96
851	Regions/clus2	3608	15266	0		11.4186
852	Regions/clus2	3688	15266	0		11.7884
853	Regions/clus2	3768	15266	0		12.0595
854	Regions/clus2	3848	15266	0		9.19306
855	Regions/clus2	3928	15266	0		9.04192
856	Regions/clus2	4008	15266	0		10.4168
857	Regions/clus2	4088	15266	0		9.5667
858	Regions/clus2	4168	15266	0		9.69221
859	Regions/clus2	4248	15266	0		7.73827
860	Regions/clus2	4328	15266	0		8.11014
873	Regions/clus2	5368	15266	0		10.4348
877	Regions/clus2	5688	15266	0		9.66058
878	Regions/clus2	5768	15266	0		9.65202
932	Regions/clus2	2808	15186	0		9.27723
933	Regions/clus2	2888	15186	0		10.8264
935	Regions/clus2	3048	15186	0		11.6787
936	Regions/clus2	3128	15186	0		10.9111
937	Regions/clus2	3208	15186	0		9.53524
938	Regions/clus2	3288	15186	0		10.6713
939	Regions/clus2	3368	15186	0		10.043
940	Regions/clus2	3448	15186	0		11.9899
941	Regions/clus2	3528	15186	0		9.96454
942	Regions/clus2	3608	15186	0		8.78828
944	Regions/clus2	3768	15186	0		10.2691
945	Regions/clus2	3848	15186	0		8.85014
947	Regions/clus2	4008	15186	0		9.35557
948	Regions/clus2	4088	15186	0		9.0383
949	Regions/clus2	4168	15186	0		8.09061
950	Regions/clus2	4248	15186	0		9.46402
951	Regions/clus2	4328	15186	0		10.5227
961	Regions/clus2	5128	15186	0		9.78254
962	Regions/clus2	5208	15186	0		9.84455
963	Regions/clus2	5288	15186	0		9.23732
965	Regions/clus2	5448	15186	0		8.46806
966	Regions/clus2	5528	15186	0		7.57953
967	Regions/clus2	5608	15186	0		9.80755
968	Regions/clus2	5688	15186	0		9.59635
969	Regions/clus2	5768	15186	0		11.8135
970	Regions/clus2	5848	15186	0		11.8272
971	Regions/clus2	5928	15186	0		12.005
972	Regions/clus2	6008	15186	0		10.2372
973	Regions/clus2	6088	15186	0		13.3438
1022	Regions/clus2	2568	15106	0		9.66896
1023	Regions/clus2	2648	15106	0		11.4708
1024	Regions/clus2	2728	15106	0		11.3185
1026	Regions/clus2	2888	15106	0		10.6868
1027	Regions/clus2	2968	15106	0		18.8921
1029	Regions/clus2	3128	15106	0		10.3404
1031	Regions/clus2	3288	15106	0		11.2474
1042	Regions/clus2	4168	15106	0		12.1071
1043	Regions/clus2	4248	15106	0		19.7224
1044	Regions/clus2	4328	15106	0		9.04589
1046	Regions/clus2	4488	15106	0		11.819
1047	Regions/clus2	4568	15106	0		9.36186
1048	Regions/clus2	4648	15106	0		11.8912
1049	Regions/clus2	4728	15106	0		9.25568
1050	Regions/clus2	4808	15106	0		9.5508
1051	Regions/clus2	4888	15106	0		7.82946
1052	Regions/clus2	4968	15106	0		8.91339
1053	Regions/clus2	5048	15106	0		8.64177
1054	Regions/clus2	5128	15106	0		11.3333
1055	Regions/clus2	5208	15106	0		9.36947
1056	Regions/clus2	5288	15106	0		9.07323
1057	Regions/clus2	5368	15106	0		9.89982
1058	Regions/clus2	5448	15106	0		7.96831
1061	Regions/clus2	5688	15106	0		11.9316
1062	Regions/clus2	5768	15106	0		10.1408
1064	Regions/clus2	5928	15106	0		11.5534
1065	Regions/clus2	6008	15106	0		13.0867
1066	Regions/clus2	6088	15106	0		11.9539
1068	Regions/clus2	6248	15106	0		12.1225
1069	Regions/clus2	6328	15106	0		10.6119
1116	Regions/clus2	2408	15026	0		9.99939
1117	Regions/clus2	2488	15026	0		8.83672
1120	Regions/clus2	2728	15026	0		16.1233
1122	Regions/clus2	2888	15026	0		22.3104
1124	Regions/clus2	3048	15026	0		10.062
1125	Regions/clus2	3128	15026	0		11.3719
1141	Regions/clus2	4408	15026	0		12.1575
1142	Regions/clus2	4488	15026	0		7.91232
1143	Regions/clus2	4568	15026	0		9.12076
1145	Regions/clus2	4728	15026	0		11.3674
1148	Regions/clus2	4968	15026	0		8.37012
1149	Regions/clus2	5048	15026	0		9.13914
1152	Regions/clus2	5288	15026	0		9.86273
1153	Regions/clus2	5368	15026	0		8.79416
1154	Regions/clus2	5448	15026	0		9.66553
1155	Regions/clus2	5528	15026	0		9.98083
1159	Regions/clus2	5848	15026	0		11.0202
1160	Regions/clus2	5928	15026	0		9.7615
1161	Regions/clus2	6008	15026	0		12.9836
1162	Regions/clus2	6088	15026	0		10.9881
1163	Regions/clus2	6168	15026	0		12.971
1166	Regions/clus2	6408	15026	0		9.75121
1167	Regions/clus2	6488	15026	0		12.8878
1168	Regions/clus2	6568	15026	0		11.3372
1213	Regions/clus2	2248	14946	0		7.83569
1214	Regions/clus2	2328	14946	0		7.9499
1218	Regions/clus2	2648	14946	0		34.7672
1221	Regions/clus2	2888	14946	0		17.2997
1242	Regions/clus2	4568	14946	0		9.64606
1244	Regions/clus2	4728	14946	0		9.21417
1245	Regions/clus2	4808	14946	0		9.35341
1247	Regions/clus2	4968	14946	0		9.18539
1248	Regions/clus2	5048	14946	0		9.08254
1255	Regions/clus2	5608	14946	0		9.00484
1257	Regions/clus2	5768	14946	0		8.84644
1263	Regions/clus2	6248	14946	0		13.6132
1267	Regions/clus2	6568	14946	0		10.8362
1268	Regions/clus2	6648	14946	0		12.5714
1269	Regions/clus2	6728	14946	0		9.57231
1270	Regions/clus2	6808	14946	0		9.98717
1312	Regions/clus2	2168	14866	0		8.9058
1345	Regions/clus2	4808	14866	0		8.58146
1356	Regions/clus2	5688	14866	0		9.52688
1361	Regions/clus2	6088	14866	0		16.7795
1365	Regions/clus2	6408	14866	0		12.4465
1367	Regions/clus2	6568	14866	0		12.7946
1369	Regions/clus2	6728	14866	0		12.2584
1371	Regions/clus2	6888	14866	0		11.1733
1372	Regions/clus2	6968	14866	0		10.5642
1414	Regions/clus2	2088	14786	0		13.1767
1423	Regions/clus2	2808	14786	0		36.452
1425	Regions/clus2	2968	14786	0		17.5675
1459	Regions/clus2	5688	14786	0		8.79072
1462	Regions/clus2	5928	14786	0		10.3321
1463	Regions/clus2	6008	14786	0		12.1645
1470	Regions/clus2	6568	14786	0		9.74881
1473	Regions/clus2	6808	14786	0		11.2657
1474	Regions/clus2	6888	14786	0		10.6412
1475	Regions/clus2	6968	14786	0		10.6003
1476	Regions/clus2	7048	14786	0		11.4747
1477	Regions/clus2	7128	14786	0		10.7533
1519	Regions/clus2	2088	14706	0		27.3763
1523	Regions/clus2	2408	14706	0		23.145
1524	Regions/clus2	2488	14706	0		23.717
1526	Regions/clus2	2648	14706	0		35.2201
1527	Regions/clus2	2728	14706	0		36.1498
1530	Regions/clus2	2968	14706	0		15.8597
1531	Regions/clus2	3048	14706	0		15.7785
1563	Regions/clus2	5608	14706	0		7.91824
1567	Regions/clus2	5928	14706	0		9.87947
1573	Regions/clus2	6408	14706	0		10.2464
1578	Regions/clus2	6808	14706	0		10.6392
1581	Regions/clus2	7048	14706	0		10.787
1582	Regions/clus2	7128	14706	0		11.5989
1583	Regions/clus2	7208	14706	0		10.0163
1584	Regions/clus2	7288	14706	0		8.91082
1622	Regions/clus2	1848	14626	0		10.9619
1628	Regions/clus2	2328	14626	0		20.5826
1629	Regions/clus2	2408	14626	0		30.6766
1630	Regions/clus2	2488	14626	0		26.8804
1631	Regions/clus2	2568	14626	0		30.7718
1632	Regions/clus2	2648	14626	0		30.6368
1633	Regions/clus2	2728	14626	0		25.9297
1668	Regions/clus2	5528	14626	0		7.13289
1671	Regions/clus2	5768	14626	0		11.2842
1682	Regions/clus2	6648	14626	0		9.15146
1684	Regions/clus2	6808	14626	0		9.2988
1685	Regions/clus2	6888	14626	0		10.8684
1689	Regions/clus2	7208	14626	0		7.11315
1692	Regions/clus2	7448	14626	0		8.23109
1693	Regions/clus2	7528	14626	0		8.26629
1726	Regions/clus2	1688	14546	0		8.40568
1727	Regions/clus2	1768	14546	0		8.31904
1734	Regions/clus2	2328	14546	0		27.8319
1736	Regions/clus2	2488	14546	0		24.4248
1737	Regions/clus2	2568	14546	0		27.9802
1738	Regions/clus2	2648	14546	0		23.7004
1739	Regions/clus2	2728	14546	0		32.4648
1746	Regions/clus2	3288	14546	0		15.6551
1747	Regions/clus2	3368	14546	0		17.1016
1748	Regions/clus2	3448	14546	0		13.7866
1749	Regions/clus2	3528	14546	0		14.003
1750	Regions/clus2	3608	14546	0		15.1864
1782	Regions/clus2	6168	14546	0		13.5393
1786	Regions/clus2	6488	14546	0		8.14782
1790	Regions/clus2	6808	14546	0		9.35697
1793	Regions/clus2	7048	14546	0		9.23599
1796	Regions/clus2	7288	14546	0		8.76489
1797	Regions/clus2	7368	14546	0		7.12213
1799	Regions/clus2	7528	14546	0		8.71887
1800	Regions/clus2	7608	14546	0		8.85081
1834	Regions/clus2	1688	14466	0		6.93233
1842	Regions/clus2	2328	14466	0		21.9679
1843	Regions/clus2	2408	14466	0		26.5062
1844	Regions/clus2	2488	14466	0		35.9508
1845	Regions/clus2	2568	14466	0		27.4325
1846	Regions/clus2	2648	14466	0		26.015
1852	Regions/clus2	3128	14466	0		12.7145
1856	Regions/clus2	3448	14466	0		9.454
1857	Regions/clus2	3528	14466	0		11.7623
1891	Regions/clus2	6248	14466	0		9.6238
1898	Regions/clus2	6808	14466	0		9.3648
1899	Regions/clus2	6888	14466	0		10.8485
1903	Regions/clus2	7208	14466	0		9.5113
1909	Regions/clus2	7688	14466	0		6.47934
1910	Regions/clus2	7768	14466	0		7.1295
1942	Regions/clus2	1608	14386	0		7.61041
1948	Regions/clus2	2088	14386	0		7.7843
1950	Regions/clus2	2248	14386	0		21.968
1951	Regions/clus2	2328	14386	0		22.8581
1952	Regions/clus2	2408	14386	0		42.088
1953	Regions/clus2	2488	14386	0		30.8852
1954	Regions/clus2	2568	14386	0		23.1675
1962	Regions/clus2	3208	14386	0		12.3241
1995	Regions/clus2	5848	14386	0		6.86885
1996	Regions/clus2	5928	14386	0		9.3753
1999	Regions/clus2	6168	14386	0		9.3469
2000	Regions/clus2	6248	14386	0		8.59879
2001	Regions/clus2	6328	14386	0		11.3871
2003	Regions/clus2	6488	14386	0		9.72355
2007	Regions/clus2	6808	14386	0		10.6002
2010	Regions/clus2	7048	14386	0		8.18773
2011	Regions/clus2	7128	14386	0		8.99187
2016	Regions/clus2	7528	14386	0		7.85828
2018	Regions/clus2	7688	14386	0		8.10266
2019	Regions/clus2	7768	14386	0		8.43646
2020	Regions/clus2	7848	14386	0		8.48729
2051	Regions/clus2	1528	14306	0		7.84477
2056	Regions/clus2	1928	14306	0		8.85719
2058	Regions/clus2	2088	14306	0		7.98725
2059	Regions/clus2	2168	14306	0		10.8989
2061	Regions/clus2	2328	14306	0		24.8472
2062	Regions/clus2	2408	14306	0		25.0201
2063	Regions/clus2	2488	14306	0		31.6049
2070	Regions/clus2	3048	14306	0		13.2796
2071	Regions/clus2	3128	14306	0		10.9169
2097	Regions/clus2	5208	14306	0		6.69306
2110	Regions/clus2	6248	14306	0		8.99457
2111	Regions/clus2	6328	14306	0		9.89902
2112	Regions/clus2	6408	14306	0		12.6783
2114	Regions/clus2	6568	14306	0		9.75282
2115	Regions/clus2	6648	14306	0		8.36016
2116	Regions/clus2	6728	14306	0		8.61149
2117	Regions/clus2	6808	14306	0		9.39211
2119	Regions/clus2	6968	14306	0		10.3179
2122	Regions/clus2	7208	14306	0		10.4019
2123	Regions/clus2	7288	14306	0		14.2153
2124	Regions/clus2	7368	14306	0		8.53909
2130	Regions/clus2	7848	14306	0		7.27279
2131	Regions/clus2	7928	14306	0		6.24055
2167	Regions/clus2	1928	14226	0		7.42406
2168	Regions/clus2	2008	14226	0		7.76634
2170	Regions/clus2	2168	14226	0		11.4183
2171	Regions/clus2	2248	14226	0		16.3314
2172	Regions/clus2	2328	14226	0		11.9267
2173	Regions/clus2	2408	14226	0		15.8204
2180	Regions/clus2	2968	14226	0		11.3315
2181	Regions/clus2	3048	14226	0		12.0525
2198	Regions/clus2	4408	14226	0		6.99722
2209	Regions/clus2	5288	14226	0		5.47427
2210	Regions/clus2	5368	14226	0		5.65899
2220	Regions/clus2	6168	14226	0		9.07178
2221	Regions/clus2	6248	14226	0		9.98008
2222	Regions/clus2	6328	14226	0		11.1631
2225	Regions/clus2	6568	14226	0		9.95007
2227	Regions/clus2	6728	14226	0		9.01124
2228	Regions/clus2	6808	14226	0		7.83477
2231	Regions/clus2	7048	14226	0		9.33044
2232	Regions/clus2	7128	14226	0		7.70617
2233	Regions/clus2	7208	14226	0		9.19339
2239	Regions/clus2	7688	14226	0		7.97197
2242	Regions/clus2	7928	14226	0		7.34108
2243	Regions/clus2	8008	14226	0		6.52184
2272	Regions/clus2	1448	14146	0		6.66435
2273	Regions/clus2	1528	14146	0		8.44181
2276	Regions/clus2	1768	14146	0		8.94124
2277	Regions/clus2	1848	14146	0		8.98629
2281	Regions/clus2	2168	14146	0		11.9197
2282	Regions/clus2	2248	14146	0		12.681
2283	Regions/clus2	2328	14146	0		11.9982
2290	Regions/clus2	2888	14146	0		10.1766
2292	Regions/clus2	3048	14146	0		12.3585
2294	Regions/clus2	3208	14146	0		8.00562
2306	Regions/clus2	4168	14146	0		7.56319
2307	Regions/clus2	4248	14146	0		7.06304
2308	Regions/clus2	4328	14146	0		8.14377
2319	Regions/clus2	5208	14146	0		6.34585
2331	Regions/clus2	6168	14146	0		8.01996
2332	Regions/clus2	6248	14146	0		8.8417
2333	Regions/clus2	6328	14146	0		10.4164
2335	Regions/clus2	6488	14146	0		9.74788
2336	Regions/clus2	6568	14146	0		10.6994
2337	Regions/clus2	6648	14146	0		7.74949
2340	Regions/clus2	6888	14146	0		9.77823
2344	Regions/clus2	7208	14146	0		11.5743
2345	Regions/clus2	7288	14146	0		16.1749
2346	Regions/clus2	7368	14146	0		12.0671
2349	Regions/clus2	7608	14146	0		7.90568
2353	Regions/clus2	7928	14146	0		6.42508
2354	Regions/clus2	8008	14146	0		5.92545
2384	Regions/clus2	1368	14066	0		6.11157
2390	Regions/clus2	1848	14066	0		7.67186
2394	Regions/clus2	2168	14066	0		17.2441
2395	Regions/clus2	2248	14066	0		11.3808
2403	Regions/clus2	2888	14066	0		9.71606
2404	Regions/clus2	2968	14066	0		9.86055
2405	Regions/clus2	3048	14066	0		10.8431
2419	Regions/clus2	4168	14066	0		6.73505
2420	Regions/clus2	4248	14066	0		7.00615
2433	Regions/clus2	5288	14066	0		7.81203
2434	Regions/clus2	5368	14066	0		7.73666
2445	Regions/clus2	6248	14066	0		8.13797
2446	Regions/clus2	6328	14066	0		7.95206
2447	Regions/clus2	6408	14066	0		10.0594
2449	Regions/clus2	6568	14066	0		8.17131
2450	Regions/clus2	6648	14066	0		7.74154
2451	Regions/clus2	6728	14066	0		8.20555
2452	Regions/clus2	6808	14066	0		8.20951
2453	Regions/clus2	6888	14066	0		7.91352
2458	Regions/clus2	7288	14066	0		10.3085
2459	Regions/clus2	7368	14066	0		12.2552
2461	Regions/clus2	7528	14066	0		7.48449
2462	Regions/clus2	7608	14066	0		8.68736
2463	Regions/clus2	7688	14066	0		8.0538
2465	Regions/clus2	7848	14066	0		8.71113
2467	Regions/clus2	8008	14066	0		6.65693
2469	Regions/clus2	8168	14066	0		7.00078
2497	Regions/clus2	1368	13986	0		6.63942
2507	Regions/clus2	2168	13986	0		21.0588
2508	Regions/clus2	2248	13986	0		15.2114
2513	Regions/clus2	2648	13986	0		11.8743
2514	Regions/clus2	2728	13986	0		10.5077
2515	Regions/clus2	2808	13986	0		8.42121
2516	Regions/clus2	2888	13986	0		11.0973
2517	Regions/clus2	2968	13986	0		8.90687
2556	Regions/clus2	6088	13986	0		7.2904
2557	Regions/clus2	6168	13986	0		7.31026
2558	Regions/clus2	6248	13986	0		7.91847
2561	Regions/clus2	6488	13986	0		9.0333
2562	Regions/clus2	6568	13986	0		7.28751
2563	Regions/clus2	6648	13986	0		7.38734
2564	Regions/clus2	6728	13986	0		10.7739
2565	Regions/clus2	6808	13986	0		9.333
2571	Regions/clus2	7288	13986	0		8.96827
2574	Regions/clus2	7528	13986	0		11.8967
2578	Regions/clus2	7848	13986	0		6.73116
2581	Regions/clus2	8088	13986	0		8.09774
2582	Regions/clus2	8168	13986	0		6.54126
2621	Regions/clus2	2168	13906	0		14.209
2624	Regions/clus2	2408	13906	0		10.6898
2625	Regions/clus2	2488	13906	0		10.8808
2628	Regions/clus2	2728	13906	0		12.3471
2629	Regions/clus2	2808	13906	0		9.97004
2630	Regions/clus2	2888	13906	0		8.83927
2671	Regions/clus2	6168	13906	0		8.23332
2673	Regions/clus2	6328	13906	0		7.80615
2674	Regions/clus2	6408	13906	0		7.59908
2675	Regions/clus2	6488	13906	0		7.45551
2677	Regions/clus2	6648	13906	0		7.31039
2679	Regions/clus2	6808	13906	0		8.76641
2684	Regions/clus2	7208	13906	0		11.4281
2685	Regions/clus2	7288	13906	0		12.019
2686	Regions/clus2	7368	13906	0		9.11312
2688	Regions/clus2	7528	13906	0		7.89703
2696	Regions/clus2	8168	13906	0		7.41973
2724	Regions/clus2	1208	13826	0		7.01185
2726	Regions/clus2	1368	13826	0		6.77282
2740	Regions/clus2	2488	13826	0		9.48582
2742	Regions/clus2	2648	13826	0		14.8613
2743	Regions/clus2	2728	13826	0		10.9443
2744	Regions/clus2	2808	13826	0		8.79579
2745	Regions/clus2	2888	13826	0		7.66838
2791	Regions/clus2	6568	13826	0		8.68323
2792	Regions/clus2	6648	13826	0		8.90558
2804	Regions/clus2	7608	13826	0		7.60953
2805	Regions/clus2	7688	13826	0		7.41721
2812	Regions/clus2	8248	13826	0		6.40418
2840	Regions/clus2	1288	13746	0		7.31066
2844	Regions/clus2	1608	13746	0		8.37609
2854	Regions/clus2	2408	13746	0		12.0222
2856	Regions/clus2	2568	13746	0		9.37565
2857	Regions/clus2	2648	13746	0		10.4038
2858	Regions/clus2	2728	13746	0		11.5065
2859	Regions/clus2	2808	13746	0		8.47963
2904	Regions/clus2	6408	13746	0		8.42263
2906	Regions/clus2	6568	13746	0		6.22959
2907	Regions/clus2	6648	13746	0		7.55006
2909	Regions/clus2	6808	13746	0		8.58017
2917	Regions/clus2	7448	13746	0		8.92176
2918	Regions/clus2	7528	13746	0		7.13652
2919	Regions/clus2	7608	13746	0		7.77614
2955	Regions/clus2	1128	13666	0		9.40508
2956	Regions/clus2	1208	13666	0		6.4057
2957	Regions/clus2	1288	13666	0		7.26891
2958	Regions/clus2	1368	13666	0		10.3542
2959	Regions/clus2	1448	13666	0		8.67745
2969	Regions/clus2	2248	13666	0		13.2449
2970	Regions/clus2	2328	13666	0		9.29995
2972	Regions/clus2	2488	13666	0		7.75912
2973	Regions/clus2	2568	13666	0		9.97339
2976	Regions/clus2	2808	13666	0		10.3111
2978	Regions/clus2	2968	13666	0		7.4959
3016	Regions/clus2	6008	13666	0		7.68477
3023	Regions/clus2	6568	13666	0		8.4741
3025	Regions/clus2	6728	13666	0		8.99571
3026	Regions/clus2	6808	13666	0		9.8577
3032	Regions/clus2	7288	13666	0		8.89609
3036	Regions/clus2	7608	13666	0		8.40508
3042	Regions/clus2	8088	13666	0		6.37131
3071	Regions/clus2	1048	13586	0		6.65851
3072	Regions/clus2	1128	13586	0		7.65404
3075	Regions/clus2	1368	13586	0		6.95926
3077	Regions/clus2	1528	13586	0		10.1157
3089	Regions/clus2	2488	13586	0		8.29174
3091	Regions/clus2	2648	13586	0		9.29227
3093	Regions/clus2	2808	13586	0		13.9979
3094	Regions/clus2	2888	13586	0		10.8794
3095	Regions/clus2	2968	13586	0		9.01382
3140	Regions/clus2	6568	13586	0		6.54246
3142	Regions/clus2	6728	13586	0		5.92731
3143	Regions/clus2	6808	13586	0		7.53591
3144	Regions/clus2	6888	13586	0		9.29563
3145	Regions/clus2	6968	13586	0		9.3858
3150	Regions/clus2	7368	13586	0		8.573
3154	Regions/clus2	7688	13586	0		6.78084
3188	Regions/clus2	1048	13506	0		7.64641
3189	Regions/clus2	1128	13506	0		7.07984
3190	Regions/clus2	1208	13506	0		7.15756
3208	Regions/clus2	2648	13506	0		10.4704
3211	Regions/clus2	2888	13506	0		11.5557
3213	Regions/clus2	3048	13506	0		9.07551
3257	Regions/clus2	6568	13506	0		7.38648
3259	Regions/clus2	6728	13506	0		8.88013
3260	Regions/clus2	6808	13506	0		8.25596
3261	Regions/clus2	6888	13506	0		9.18192
3262	Regions/clus2	6968	13506	0		8.68037
3265	Regions/clus2	7208	13506	0		10.1542
3266	Regions/clus2	7288	13506	0		8.86969
3270	Regions/clus2	7608	13506	0		7.08467
3308	Regions/clus2	1208	13426	0		6.97639
3309	Regions/clus2	1288	13426	0		7.10794
3323	Regions/clus2	2408	13426	0		9.3775
3326	Regions/clus2	2648	13426	0		9.28778
3327	Regions/clus2	2728	13426	0		9.0605
3329	Regions/clus2	2888	13426	0		9.37859
3330	Regions/clus2	2968	13426	0		8.5628
3331	Regions/clus2	3048	13426	0		9.40513
3368	Regions/clus2	6008	13426	0		8.03485
3375	Regions/clus2	6568	13426	0		7.83205
3376	Regions/clus2	6648	13426	0		8.26848
3377	Regions/clus2	6728	13426	0		9.10346
3379	Regions/clus2	6888	13426	0		7.08291
3384	Regions/clus2	7288	13426	0		9.66385
3385	Regions/clus2	7368	13426	0		8.27916
3388	Regions/clus2	7608	13426	0		7.68033
3423	Regions/clus2	968	13346	0		5.7324
3424	Regions/clus2	1048	13346	0		7.25966
3425	Regions/clus2	1128	13346	0		6.79176
3431	Regions/clus2	1608	13346	0		10.8334
3437	Regions/clus2	2088	13346	0		11.4873
3440	Regions/clus2	2328	13346	0		8.22706
3443	Regions/clus2	2568	13346	0		10.4421
3445	Regions/clus2	2728	13346	0		10.1062
3447	Regions/clus2	2888	13346	0		7.71449
3448	Regions/clus2	2968	13346	0		9.64084
3490	Regions/clus2	6328	13346	0		6.47791
3492	Regions/clus2	6488	13346	0		8.63031
3497	Regions/clus2	6888	13346	0		9.73179
3502	Regions/clus2	7288	13346	0		8.32248
3504	Regions/clus2	7448	13346	0		8.09944
3505	Regions/clus2	7528	13346	0		7.64741
3509	Regions/clus2	7848	13346	0		8.81075
3543	Regions/clus2	1048	13266	0		7.17356
3544	Regions/clus2	1128	13266	0		6.68996
3546	Regions/clus2	1288	13266	0		7.42253
3547	Regions/clus2	1368	13266	0		6.911
3550	Regions/clus2	1608	13266	0		11.331
3559	Regions/clus2	2328	13266	0		9.76869
3560	Regions/clus2	2408	13266	0		9.0553
3561	Regions/clus2	2488	13266	0		9.47652
3565	Regions/clus2	2808	13266	0		9.60563
3566	Regions/clus2	2888	13266	0		9.74213
3567	Regions/clus2	2968	13266	0		8.29154
3599	Regions/clus2	5528	13266	0		8.79321
3603	Regions/clus2	5848	13266	0		8.86144
3607	Regions/clus2	6168	13266	0		7.32728
3609	Regions/clus2	6328	13266	0		9.04506
3610	Regions/clus2	6408	13266	0		7.31567
3613	Regions/clus2	6648	13266	0		9.15337
3615	Regions/clus2	6808	13266	0		7.69201
3616	Regions/clus2	6888	13266	0		8.85893
3624	Regions/clus2	7528	13266	0		8.23479
3625	Regions/clus2	7608	13266	0		8.62252
3627	Regions/clus2	7768	13266	0		6.82952
3628	Regions/clus2	7848	13266	0		7.29814
3663	Regions/clus2	1048	13186	0		6.35023
3670	Regions/clus2	1608	13186	0		11.1128
3671	Regions/clus2	1688	13186	0		9.89008
3680	Regions/clus2	2408	13186	0		8.73867
3682	Regions/clus2	2568	13186	0		11.197
3683	Regions/clus2	2648	13186	0		11.4245
3717	Regions/clus2	5368	13186	0		7.70693
3728	Regions/clus2	6248	13186	0		8.03204
3733	Regions/clus2	6648	13186	0		8.60063
3734	Regions/clus2	6728	13186	0		7.05024
3735	Regions/clus2	6808	13186	0		8.34718
3740	Regions/clus2	7208	13186	0		9.24139
3741	Regions/clus2	7288	13186	0		7.12513
3748	Regions/clus2	7848	13186	0		7.56718
3782	Regions/clus2	968	13106	0		6.84912
3783	Regions/clus2	1048	13106	0		6.1973
3784	Regions/clus2	1128	13106	0		5.7293
3790	Regions/clus2	1608	13106	0		8.40532
3791	Regions/clus2	1688	13106	0		10.0434
3800	Regions/clus2	2408	13106	0		8.79183
3801	Regions/clus2	2488	13106	0		8.43274
3803	Regions/clus2	2648	13106	0		8.13953
3808	Regions/clus2	3048	13106	0		9.22324
3811	Regions/clus2	3288	13106	0		9.267
3843	Regions/clus2	5848	13106	0		7.60124
3848	Regions/clus2	6248	13106	0		7.69128
3849	Regions/clus2	6328	13106	0		8.9034
3850	Regions/clus2	6408	13106	0		8.15553
3854	Regions/clus2	6728	13106	0		8.82205
3855	Regions/clus2	6808	13106	0		7.15347
3862	Regions/clus2	7368	13106	0		7.87912
3865	Regions/clus2	7608	13106	0		9.51855
3866	Regions/clus2	7688	13106	0		6.23109
3902	Regions/clus2	968	13026	0		7.01044
3903	Regions/clus2	1048	13026	0		6.4268
3911	Regions/clus2	1688	13026	0		9.3414
3921	Regions/clus2	2488	13026	0		9.19837
3923	Regions/clus2	2648	13026	0		9.23635
3925	Regions/clus2	2808	13026	0		7.00454
3928	Regions/clus2	3048	13026	0		8.39785
3929	Regions/clus2	3128	13026	0		6.40023
3964	Regions/clus2	5928	13026	0		8.32947
3967	Regions/clus2	6168	13026	0		7.88041
3969	Regions/clus2	6328	13026	0		9.33038
3973	Regions/clus2	6648	13026	0		9.39676
3974	Regions/clus2	6728	13026	0		8.90481
3975	Regions/clus2	6808	13026	0		10.5502
3980	Regions/clus2	7208	13026	0		7.1068
3981	Regions/clus2	7288	13026	0		7.34929
3984	Regions/clus2	7528	13026	0		7.26343
3988	Regions/clus2	7848	13026	0		8.23858
4022	Regions/clus2	1048	12946	0		6.99664
4030	Regions/clus2	1688	12946	0		8.35662
4031	Regions/clus2	1768	12946	0		10.1489
4042	Regions/clus2	2648	12946	0		8.45619
4043	Regions/clus2	2728	12946	0		8.10639
4046	Regions/clus2	2968	12946	0		7.91782
4052	Regions/clus2	3448	12946	0		6.72969
4086	Regions/clus2	6168	12946	0		6.73187
4088	Regions/clus2	6328	12946	0		9.43068
4089	Regions/clus2	6408	12946	0		8.54665
4091	Regions/clus2	6568	12946	0		10.3592
4092	Regions/clus2	6648	12946	0		11.7431
4100	Regions/clus2	7288	12946	0		7.93163
4149	Regions/clus2	1688	12866	0		7.82941
4150	Regions/clus2	1768	12866	0		8.31851
4155	Regions/clus2	2168	12866	0		8.19486
4162	Regions/clus2	2728	12866	0		7.87415
4166	Regions/clus2	3048	12866	0		7.74681
4205	Regions/clus2	6168	12866	0		8.97214
4211	Regions/clus2	6648	12866	0		8.726
4212	Regions/clus2	6728	12866	0		8.88246
4215	Regions/clus2	6968	12866	0		9.24813
4219	Regions/clus2	7288	12866	0		6.4192
4222	Regions/clus2	7528	12866	0		7.42721
4223	Regions/clus2	7608	12866	0		6.32325
4228	Regions/clus2	8008	12866	0		6.74635
4235	Regions/clus2	8568	12866	0		8.39472
4269	Regions/clus2	1768	12786	0		7.72469
4270	Regions/clus2	1848	12786	0		8.44765
4282	Regions/clus2	2808	12786	0		7.27255
4283	Regions/clus2	2888	12786	0		8.54954
4284	Regions/clus2	2968	12786	0		7.65933
4319	Regions/clus2	5768	12786	0		8.87557
4321	Regions/clus2	5928	12786	0		6.22689
4322	Regions/clus2	6008	12786	0		7.9615
4327	Regions/clus2	6408	12786	0		9.41368
4329	Regions/clus2	6568	12786	0		7.62563
4336	Regions/clus2	7128	12786	0		9.85939
4337	Regions/clus2	7208	12786	0		9.91572
4388	Regions/clus2	1768	12706	0		9.16605
4389	Regions/clus2	1848	12706	0		7.49559
4390	Regions/clus2	1928	12706	0		7.79404
4401	Regions/clus2	2808	12706	0		16.8168
4402	Regions/clus2	2888	12706	0		7.96096
4403	Regions/clus2	2968	12706	0		7.3004
4405	Regions/clus2	3128	12706	0		7.41485
4410	Regions/clus2	3528	12706	0		6.22649
4411	Regions/clus2	3608	12706	0		7.27416
4438	Regions/clus2	5768	12706	0		8.32368
4443	Regions/clus2	6168	12706	0		8.52274
4446	Regions/clus2	6408	12706	0		9.97603
4447	Regions/clus2	6488	12706	0		7.97427
4451	Regions/clus2	6808	12706	0		9.26708
4452	Regions/clus2	6888	12706	0		8.4486
4454	Regions/clus2	7048	12706	0		10.2345
4455	Regions/clus2	7128	12706	0		9.37173
4456	Regions/clus2	7208	12706	0		7.67309
4457	Regions/clus2	7288	12706	0		9.87559
4460	Regions/clus2	7528	12706	0		7.41312
4499	Regions/clus2	1048	12626	0		6.53586
4508	Regions/clus2	1768	12626	0		7.13716
4509	Regions/clus2	1848	12626	0		7.05117
4510	Regions/clus2	1928	12626	0		5.97532
4521	Regions/clus2	2808	12626	0		7.07286
4522	Regions/clus2	2888	12626	0		8.18157
4523	Regions/clus2	2968	12626	0		7.54788
4524	Regions/clus2	3048	12626	0		9.26141
4525	Regions/clus2	3128	12626	0		6.48183
4526	Regions/clus2	3208	12626	0		8.1343
4527	Regions/clus2	3288	12626	0		8.58648
4528	Regions/clus2	3368	12626	0		7.81004
4530	Regions/clus2	3528	12626	0		6.60145
4531	Regions/clus2	3608	12626	0		8.41492
4559	Regions/clus2	5848	12626	0		8.43159
4560	Regions/clus2	5928	12626	0		6.69423
4561	Regions/clus2	6008	12626	0		7.58503
4562	Regions/clus2	6088	12626	0		6.65986
4564	Regions/clus2	6248	12626	0		6.8172
4566	Regions/clus2	6408	12626	0		6.47402
4567	Regions/clus2	6488	12626	0		7.92314
4571	Regions/clus2	6808	12626	0		8.0391
4573	Regions/clus2	6968	12626	0		7.54084
4574	Regions/clus2	7048	12626	0		7.288
4575	Regions/clus2	7128	12626	0		9.43819
4576	Regions/clus2	7208	12626	0		7.64891
4579	Regions/clus2	7448	12626	0		7.728
4618	Regions/clus2	1048	12546	0		7.72858
4625	Regions/clus2	1608	12546	0		7.68607
4626	Regions/clus2	1688	12546	0		8.32615
4627	Regions/clus2	1768	12546	0		7.23098
4628	Regions/clus2	1848	12546	0		7.29644
4629	Regions/clus2	1928	12546	0		5.8122
4630	Regions/clus2	2008	12546	0		7.70497
4631	Regions/clus2	2088	12546	0		8.83756
4641	Regions/clus2	2888	12546	0		5.79592
4642	Regions/clus2	2968	12546	0		7.42273
4643	Regions/clus2	3048	12546	0		7.35941
4644	Regions/clus2	3128	12546	0		6.61391
4645	Regions/clus2	3208	12546	0		6.13534
4646	Regions/clus2	3288	12546	0		6.49467
4647	Regions/clus2	3368	12546	0		5.99054
4648	Regions/clus2	3448	12546	0		6.3958
4650	Regions/clus2	3608	12546	0		4.90366
4651	Regions/clus2	3688	12546	0		5.54768
4652	Regions/clus2	3768	12546	0		8.67123
4677	Regions/clus2	5768	12546	0		5.93332
4678	Regions/clus2	5848	12546	0		6.65485
4679	Regions/clus2	5928	12546	0		9.16244
4681	Regions/clus2	6088	12546	0		5.81208
4683	Regions/clus2	6248	12546	0		7.67789
4690	Regions/clus2	6808	12546	0		14.3479
4692	Regions/clus2	6968	12546	0		7.71476
4693	Regions/clus2	7048	12546	0		8.48495
4694	Regions/clus2	7128	12546	0		7.53459
4696	Regions/clus2	7288	12546	0		7.02998
4743	Regions/clus2	1528	12466	0		6.51314
4744	Regions/clus2	1608	12466	0		8.02515
4745	Regions/clus2	1688	12466	0		9.57441
4746	Regions/clus2	1768	12466	0		6.68739
4747	Regions/clus2	1848	12466	0		6.81469
4748	Regions/clus2	1928	12466	0		6.25913
4749	Regions/clus2	2008	12466	0		6.97051
4761	Regions/clus2	2968	12466	0		7.63063
4763	Regions/clus2	3128	12466	0		6.87906
4764	Regions/clus2	3208	12466	0		7.89163
4765	Regions/clus2	3288	12466	0		6.69148
4766	Regions/clus2	3368	12466	0		6.37185
4767	Regions/clus2	3448	12466	0		7.7501
4768	Regions/clus2	3528	12466	0		9.75252
4770	Regions/clus2	3688	12466	0		7.86993
4771	Regions/clus2	3768	12466	0		6.53684
4772	Regions/clus2	3848	12466	0		6.57362
4773	Regions/clus2	3928	12466	0		7.15811
4790	Regions/clus2	5288	12466	0		6.41203
4797	Regions/clus2	5848	12466	0		6.77353
4802	Regions/clus2	6248	12466	0		7.77436
4803	Regions/clus2	6328	12466	0		7.37999
4806	Regions/clus2	6568	12466	0		6.92719
4807	Regions/clus2	6648	12466	0		7.10494
4808	Regions/clus2	6728	12466	0		7.63832
4862	Regions/clus2	1528	12386	0		7.78075
4863	Regions/clus2	1608	12386	0		6.79989
4864	Regions/clus2	1688	12386	0		8.25956
4865	Regions/clus2	1768	12386	0		7.08556
4866	Regions/clus2	1848	12386	0		5.70073
4867	Regions/clus2	1928	12386	0		7.0153
4868	Regions/clus2	2008	12386	0		6.57643
4880	Regions/clus2	2968	12386	0		7.12479
4881	Regions/clus2	3048	12386	0		6.69259
4882	Regions/clus2	3128	12386	0		6.42347
4883	Regions/clus2	3208	12386	0		5.95578
4884	Regions/clus2	3288	12386	0		7.06267
4885	Regions/clus2	3368	12386	0		6.2526
4886	Regions/clus2	3448	12386	0		8.16777
4888	Regions/clus2	3608	12386	0		6.06063
4889	Regions/clus2	3688	12386	0		7.16818
4890	Regions/clus2	3768	12386	0		6.10668
4891	Regions/clus2	3848	12386	0		6.35902
4892	Regions/clus2	3928	12386	0		6.98027
4894	Regions/clus2	4088	12386	0		6.43674
4895	Regions/clus2	4168	12386	0		6.23138
4896	Regions/clus2	4248	12386	0		5.96066
4908	Regions/clus2	5208	12386	0		6.81052
4910	Regions/clus2	5368	12386	0		7.25076
4915	Regions/clus2	5768	12386	0		7.31287
4920	Regions/clus2	6168	12386	0		6.55388
4921	Regions/clus2	6248	12386	0		6.25076
4922	Regions/clus2	6328	12386	0		6.86925
4927	Regions/clus2	6728	12386	0		6.98231
4928	Regions/clus2	6808	12386	0		11.1691
4930	Regions/clus2	6968	12386	0		9.76329
4964	Regions/clus2	248	12306	0		7.8675
4981	Regions/clus2	1608	12306	0		7.59015
4982	Regions/clus2	1688	12306	0		7.80824
4983	Regions/clus2	1768	12306	0		6.57917
4984	Regions/clus2	1848	12306	0		5.95598
4985	Regions/clus2	1928	12306	0		6.4486
4986	Regions/clus2	2008	12306	0		7.50923
4987	Regions/clus2	2088	12306	0		7.1011
4988	Regions/clus2	2168	12306	0		7.33664
4997	Regions/clus2	2888	12306	0		5.99453
4999	Regions/clus2	3048	12306	0		5.71863
5000	Regions/clus2	3128	12306	0		5.49368
5001	Regions/clus2	3208	12306	0		5.9428
5002	Regions/clus2	3288	12306	0		6.74916
5003	Regions/clus2	3368	12306	0		4.93735
5009	Regions/clus2	3848	12306	0		6.60483
5010	Regions/clus2	3928	12306	0		5.87491
5012	Regions/clus2	4088	12306	0		5.77846
5014	Regions/clus2	4248	12306	0		5.61737
5032	Regions/clus2	5688	12306	0		7.10294
5037	Regions/clus2	6088	12306	0		5.9476
5038	Regions/clus2	6168	12306	0		5.38416
5042	Regions/clus2	6488	12306	0		5.88286
5043	Regions/clus2	6568	12306	0		5.7299
5044	Regions/clus2	6648	12306	0		6.80179
5045	Regions/clus2	6728	12306	0		8.66597
5100	Regions/clus2	1688	12226	0		6.46792
5101	Regions/clus2	1768	12226	0		6.02688
5102	Regions/clus2	1848	12226	0		7.31617
5103	Regions/clus2	1928	12226	0		6.10764
5104	Regions/clus2	2008	12226	0		6.80811
5105	Regions/clus2	2088	12226	0		6.44057
5106	Regions/clus2	2168	12226	0		7.05366
5107	Regions/clus2	2248	12226	0		8.68453
5116	Regions/clus2	2968	12226	0		5.82907
5117	Regions/clus2	3048	12226	0		6.16642
5118	Regions/clus2	3128	12226	0		6.50986
5121	Regions/clus2	3368	12226	0		6.24049
5123	Regions/clus2	3528	12226	0		6.43879
5124	Regions/clus2	3608	12226	0		9.65928
5127	Regions/clus2	3848	12226	0		6.2044
5130	Regions/clus2	4088	12226	0		4.93229
5152	Regions/clus2	5848	12226	0		6.36731
5154	Regions/clus2	6008	12226	0		7.44875
5155	Regions/clus2	6088	12226	0		6.75777
5156	Regions/clus2	6168	12226	0		7.2828
5163	Regions/clus2	6728	12226	0		6.56117
5164	Regions/clus2	6808	12226	0		9.29219
5217	Regions/clus2	1768	12146	0		6.4925
5218	Regions/clus2	1848	12146	0		6.3382
5219	Regions/clus2	1928	12146	0		5.99858
5220	Regions/clus2	2008	12146	0		6.39855
5221	Regions/clus2	2088	12146	0		6.97739
5222	Regions/clus2	2168	12146	0		8.438
5223	Regions/clus2	2248	12146	0		9.31963
5224	Regions/clus2	2328	12146	0		12.0151
5225	Regions/clus2	2408	12146	0		7.66814
5232	Regions/clus2	2968	12146	0		6.72636
5233	Regions/clus2	3048	12146	0		6.19381
5234	Regions/clus2	3128	12146	0		6.93896
5243	Regions/clus2	3848	12146	0		5.78144
5265	Regions/clus2	5608	12146	0		5.77152
5268	Regions/clus2	5848	12146	0		7.27644
5271	Regions/clus2	6088	12146	0		5.97903
5273	Regions/clus2	6248	12146	0		11.3302
5282	Regions/clus2	6968	12146	0		7.23021
5284	Regions/clus2	7128	12146	0		6.92577
5285	Regions/clus2	7208	12146	0		7.39665
5335	Regions/clus2	1928	12066	0		5.15831
5336	Regions/clus2	2008	12066	0		6.48593
5337	Regions/clus2	2088	12066	0		6.38504
5338	Regions/clus2	2168	12066	0		7.25426
5339	Regions/clus2	2248	12066	0		9.03141
5340	Regions/clus2	2328	12066	0		9.27441
5341	Regions/clus2	2408	12066	0		9.32143
5342	Regions/clus2	2488	12066	0		9.05382
5348	Regions/clus2	2968	12066	0		7.47154
5349	Regions/clus2	3048	12066	0		6.77957
5350	Regions/clus2	3128	12066	0		6.86246
5357	Regions/clus2	3688	12066	0		6.09429
5359	Regions/clus2	3848	12066	0		4.91571
5384	Regions/clus2	5848	12066	0		5.66862
5386	Regions/clus2	6008	12066	0		6.10884
5387	Regions/clus2	6088	12066	0		6.52511
5388	Regions/clus2	6168	12066	0		8.14618
5389	Regions/clus2	6248	12066	0		8.80223
5390	Regions/clus2	6328	12066	0		7.10641
5397	Regions/clus2	6888	12066	0		6.58418
5451	Regions/clus2	2008	11986	0		5.98635
5452	Regions/clus2	2088	11986	0		7.83619
5453	Regions/clus2	2168	11986	0		6.75598
5454	Regions/clus2	2248	11986	0		7.0201
5455	Regions/clus2	2328	11986	0		7.43466
5456	Regions/clus2	2408	11986	0		9.45587
5457	Regions/clus2	2488	11986	0		10.2547
5458	Regions/clus2	2568	11986	0		7.9496
5465	Regions/clus2	3128	11986	0		6.88758
5466	Regions/clus2	3208	11986	0		5.4953
5475	Regions/clus2	3928	11986	0		5.22268
5496	Regions/clus2	5608	11986	0		6.14152
5497	Regions/clus2	5688	11986	0		6.17801
5498	Regions/clus2	5768	11986	0		6.26393
5502	Regions/clus2	6088	11986	0		7.21881
5503	Regions/clus2	6168	11986	0		7.69262
5505	Regions/clus2	6328	11986	0		9.2092
5566	Regions/clus2	2008	11906	0		5.9002
5567	Regions/clus2	2088	11906	0		6.02192
5568	Regions/clus2	2168	11906	0		7.43031
5569	Regions/clus2	2248	11906	0		8.46216
5570	Regions/clus2	2328	11906	0		8.35916
5571	Regions/clus2	2408	11906	0		9.30383
5572	Regions/clus2	2488	11906	0		8.14599
5574	Regions/clus2	2648	11906	0		8.55852
5575	Regions/clus2	2728	11906	0		10.238
5580	Regions/clus2	3128	11906	0		7.49838
5581	Regions/clus2	3208	11906	0		6.19833
5614	Regions/clus2	5848	11906	0		6.65061
5616	Regions/clus2	6008	11906	0		5.95173
5618	Regions/clus2	6168	11906	0		6.59118
5619	Regions/clus2	6248	11906	0		7.43727
5695	Regions/clus2	3208	11826	0		8.12296
5696	Regions/clus2	3288	11826	0		6.31069
5733	Regions/clus2	6248	11826	0		7.69534
5734	Regions/clus2	6328	11826	0		7.21024
5735	Regions/clus2	6408	11826	0		8.12557
5775	Regions/clus2	568	11746	0		4.92296
5796	Regions/clus2	2248	11746	0		5.99744
5797	Regions/clus2	2328	11746	0		6.59661
5809	Regions/clus2	3288	11746	0		7.30293
5810	Regions/clus2	3368	11746	0		6.13091
5815	Regions/clus2	3768	11746	0		5.39393
5816	Regions/clus2	3848	11746	0		5.72993
5841	Regions/clus2	5848	11746	0		6.75571
5843	Regions/clus2	6008	11746	0		6.5633
5844	Regions/clus2	6088	11746	0		6.61468
5845	Regions/clus2	6168	11746	0		6.62997
5922	Regions/clus2	3368	11666	0		6.30205
5951	Regions/clus2	5688	11666	0		6.46593
5954	Regions/clus2	5928	11666	0		6.54558
5956	Regions/clus2	6088	11666	0		5.98453
5959	Regions/clus2	6328	11666	0		6.65039
6030	Regions/clus2	3128	11586	0		8.36665
6033	Regions/clus2	3368	11586	0		7.06151
6034	Regions/clus2	3448	11586	0		5.64057
6035	Regions/clus2	3528	11586	0		7.1963
6036	Regions/clus2	3608	11586	0		6.62584
6063	Regions/clus2	5768	11586	0		7.21603
6065	Regions/clus2	5928	11586	0		6.29126
6066	Regions/clus2	6008	11586	0		6.09872
6070	Regions/clus2	6328	11586	0		6.63078
6143	Regions/clus2	3448	11506	0		5.98192
6144	Regions/clus2	3528	11506	0		6.8335
6172	Regions/clus2	5768	11506	0		7.28822
6173	Regions/clus2	5848	11506	0		6.35493
6175	Regions/clus2	6008	11506	0		6.60161
6179	Regions/clus2	6328	11506	0		7.07285
6248	Regions/clus2	3368	11426	0		6.85958
6250	Regions/clus2	3528	11426	0		6.94423
6278	Regions/clus2	5768	11426	0		7.238
6279	Regions/clus2	5848	11426	0		6.22155
6280	Regions/clus2	5928	11426	0		6.31959
6281	Regions/clus2	6008	11426	0		6.30346
6284	Regions/clus2	6248	11426	0		6.70508
6356	Regions/clus2	3928	11346	0		6.09662
6377	Regions/clus2	5608	11346	0		5.35407
6378	Regions/clus2	5688	11346	0		5.8925
6379	Regions/clus2	5768	11346	0		6.09682
6382	Regions/clus2	6008	11346	0		7.25886
6696	Regions/clus2	3208	11026	0		6.31808
6870	Regions/clus2	31528	17026	0		5.79242
7481	Regions/clus2	28408	15986	0		17.7057
7482	Regions/clus2	28488	15986	0		16.0671
7483	Regions/clus2	28568	15986	0		13.431
7554	Regions/clus2	28408	15906	0		19.4392
7555	Regions/clus2	28488	15906	0		16.8092
7556	Regions/clus2	28568	15906	0		14.7045
7557	Regions/clus2	28648	15906	0		11.8303
7623	Regions/clus2	27768	15826	0		14.9223
7624	Regions/clus2	27848	15826	0		14.0264
7625	Regions/clus2	27928	15826	0		13.8746
7626	Regions/clus2	28008	15826	0		14.7301
7627	Regions/clus2	28088	15826	0		14.2306
7628	Regions/clus2	28168	15826	0		14.4416
7629	Regions/clus2	28248	15826	0		15.3416
7630	Regions/clus2	28328	15826	0		18.7885
7631	Regions/clus2	28408	15826	0		14.5392
7632	Regions/clus2	28488	15826	0		16.8067
7633	Regions/clus2	28568	15826	0		14.1278
7635	Regions/clus2	28728	15826	0		14.6677
7641	Regions/clus2	29208	15826	0		11.3794
7700	Regions/clus2	27368	15746	0		10.1914
7702	Regions/clus2	27528	15746	0		13.0612
7703	Regions/clus2	27608	15746	0		13.5604
7704	Regions/clus2	27688	15746	0		13.1972
7705	Regions/clus2	27768	15746	0		13.4198
7706	Regions/clus2	27848	15746	0		12.885
7707	Regions/clus2	27928	15746	0		14.4063
7708	Regions/clus2	28008	15746	0		16.2121
7709	Regions/clus2	28088	15746	0		13.9437
7710	Regions/clus2	28168	15746	0		14.8355
7711	Regions/clus2	28248	15746	0		16.4458
7712	Regions/clus2	28328	15746	0		17.3706
7713	Regions/clus2	28408	15746	0		17.2491
7715	Regions/clus2	28568	15746	0		15.7975
7716	Regions/clus2	28648	15746	0		15.7629
7717	Regions/clus2	28728	15746	0		14.5343
7718	Regions/clus2	28808	15746	0		14.864
7722	Regions/clus2	29128	15746	0		14.9407
7723	Regions/clus2	29208	15746	0		13.3232
7727	Regions/clus2	30488	15746	0		9.43562
7728	Regions/clus2	30568	15746	0		9.84781
7730	Regions/clus2	30728	15746	0		15.3396
7786	Regions/clus2	27208	15666	0		11.9639
7787	Regions/clus2	27288	15666	0		11.7589
7788	Regions/clus2	27368	15666	0		12.3839
7789	Regions/clus2	27448	15666	0		15.0603
7790	Regions/clus2	27528	15666	0		13.1279
7791	Regions/clus2	27608	15666	0		13.4185
7792	Regions/clus2	27688	15666	0		13.8834
7793	Regions/clus2	27768	15666	0		12.3628
7794	Regions/clus2	27848	15666	0		11.9013
7795	Regions/clus2	27928	15666	0		12.3145
7796	Regions/clus2	28008	15666	0		14.5876
7797	Regions/clus2	28088	15666	0		14.8356
7798	Regions/clus2	28168	15666	0		17.7178
7799	Regions/clus2	28248	15666	0		17.9858
7800	Regions/clus2	28328	15666	0		17.8346
7801	Regions/clus2	28408	15666	0		21.5348
7802	Regions/clus2	28488	15666	0		18.6717
7803	Regions/clus2	28568	15666	0		16.4968
7804	Regions/clus2	28648	15666	0		15.3143
7805	Regions/clus2	28728	15666	0		15.7107
7806	Regions/clus2	28808	15666	0		14.0025
7807	Regions/clus2	28888	15666	0		16.7115
7808	Regions/clus2	28968	15666	0		16.9447
7809	Regions/clus2	29048	15666	0		15.7854
7810	Regions/clus2	29128	15666	0		12.5162
7811	Regions/clus2	29208	15666	0		13.5619
7815	Regions/clus2	30328	15666	0		7.00062
7822	Regions/clus2	30888	15666	0		16.8526
7823	Regions/clus2	30968	15666	0		14.6437
7824	Regions/clus2	31048	15666	0		17.3414
7876	Regions/clus2	27048	15586	0		9.51104
7877	Regions/clus2	27128	15586	0		12.9844
7878	Regions/clus2	27208	15586	0		12.9565
7879	Regions/clus2	27288	15586	0		14.1656
7880	Regions/clus2	27368	15586	0		13.9494
7881	Regions/clus2	27448	15586	0		13.8062
7882	Regions/clus2	27528	15586	0		14.7363
7883	Regions/clus2	27608	15586	0		12.2459
7884	Regions/clus2	27688	15586	0		12.7196
7886	Regions/clus2	27848	15586	0		11.1513
7887	Regions/clus2	27928	15586	0		13.7255
7888	Regions/clus2	28008	15586	0		12.7906
7889	Regions/clus2	28088	15586	0		13.15
7892	Regions/clus2	28328	15586	0		14.365
7893	Regions/clus2	28408	15586	0		18.6102
7895	Regions/clus2	28568	15586	0		18.7286
7896	Regions/clus2	28648	15586	0		15.2983
7898	Regions/clus2	28808	15586	0		15.3689
7900	Regions/clus2	28968	15586	0		17.6561
7901	Regions/clus2	29048	15586	0		12.9741
7903	Regions/clus2	29208	15586	0		12.0957
7904	Regions/clus2	29288	15586	0		8.7711
7907	Regions/clus2	30008	15586	0		6.31624
7910	Regions/clus2	30248	15586	0		7.09732
7911	Regions/clus2	30328	15586	0		9.96267
7918	Regions/clus2	30888	15586	0		16.4323
7920	Regions/clus2	31048	15586	0		17.5255
7921	Regions/clus2	31128	15586	0		13.3925
7922	Regions/clus2	31208	15586	0		14.5476
7923	Regions/clus2	31288	15586	0		13.9966
7973	Regions/clus2	26968	15506	0		10.8239
7974	Regions/clus2	27048	15506	0		13.2839
7975	Regions/clus2	27128	15506	0		13.6955
7976	Regions/clus2	27208	15506	0		12.1822
7978	Regions/clus2	27368	15506	0		14.4709
7985	Regions/clus2	27928	15506	0		11.283
7986	Regions/clus2	28008	15506	0		14.5543
7993	Regions/clus2	28568	15506	0		16.2872
7994	Regions/clus2	28648	15506	0		14.3478
7995	Regions/clus2	28728	15506	0		14.7156
7996	Regions/clus2	28808	15506	0		13.0367
7997	Regions/clus2	28888	15506	0		13.0497
8000	Regions/clus2	29128	15506	0		13.8561
8001	Regions/clus2	29208	15506	0		12.3618
8002	Regions/clus2	29288	15506	0		11.2636
8003	Regions/clus2	29368	15506	0		8.71841
8004	Regions/clus2	29448	15506	0		8.76568
8005	Regions/clus2	29528	15506	0		6.78714
8008	Regions/clus2	30008	15506	0		7.07513
8009	Regions/clus2	30088	15506	0		8.6246
8011	Regions/clus2	30248	15506	0		9.72117
8012	Regions/clus2	30328	15506	0		14.0966
8013	Regions/clus2	30408	15506	0		13.8054
8014	Regions/clus2	30488	15506	0		13.207
8020	Regions/clus2	30968	15506	0		17.4338
8021	Regions/clus2	31048	15506	0		13.8141
8022	Regions/clus2	31128	15506	0		17.6069
8025	Regions/clus2	31368	15506	0		12.9257
8026	Regions/clus2	31448	15506	0		11.9457
8027	Regions/clus2	31528	15506	0		11.0025
8028	Regions/clus2	31608	15506	0		12.0079
8075	Regions/clus2	26888	15426	0		13.0239
8076	Regions/clus2	26968	15426	0		12.6557
8079	Regions/clus2	27208	15426	0		12.5477
8081	Regions/clus2	27368	15426	0		8.48248
8087	Regions/clus2	27848	15426	0		11.8951
8088	Regions/clus2	27928	15426	0		11.5
8093	Regions/clus2	28328	15426	0		14.6514
8094	Regions/clus2	28408	15426	0		18.855
8095	Regions/clus2	28488	15426	0		15.2891
8096	Regions/clus2	28568	15426	0		15.1789
8100	Regions/clus2	28888	15426	0		13.2058
8101	Regions/clus2	28968	15426	0		13.9863
8102	Regions/clus2	29048	15426	0		13.2947
8103	Regions/clus2	29128	15426	0		10.8584
8104	Regions/clus2	29208	15426	0		13.1224
8105	Regions/clus2	29288	15426	0		14.8871
8106	Regions/clus2	29368	15426	0		11.5921
8111	Regions/clus2	29768	15426	0		12.9863
8114	Regions/clus2	30008	15426	0		10.482
8115	Regions/clus2	30088	15426	0		8.40961
8116	Regions/clus2	30168	15426	0		9.95696
8117	Regions/clus2	30248	15426	0		12.1607
8118	Regions/clus2	30328	15426	0		14.0964
8121	Regions/clus2	30568	15426	0		9.31907
8123	Regions/clus2	30728	15426	0		11.3453
8124	Regions/clus2	30808	15426	0		11.7837
8127	Regions/clus2	31048	15426	0		12.4052
8129	Regions/clus2	31208	15426	0		13.8559
8130	Regions/clus2	31288	15426	0		12.2011
8131	Regions/clus2	31368	15426	0		10.3629
8132	Regions/clus2	31448	15426	0		10.7549
8133	Regions/clus2	31528	15426	0		11.721
8135	Regions/clus2	31688	15426	0		10.5727
8136	Regions/clus2	31768	15426	0		12.4784
8181	Regions/clus2	26648	15346	0		10.1382
8182	Regions/clus2	26728	15346	0		11.9353
8183	Regions/clus2	26808	15346	0		11.2986
8184	Regions/clus2	26888	15346	0		10.3894
8189	Regions/clus2	27288	15346	0		9.22881
8196	Regions/clus2	27848	15346	0		12.0411
8204	Regions/clus2	28488	15346	0		13.9138
8206	Regions/clus2	28648	15346	0		9.31836
8207	Regions/clus2	28728	15346	0		10.7104
8209	Regions/clus2	28888	15346	0		12.5318
8210	Regions/clus2	28968	15346	0		12.8821
8219	Regions/clus2	29688	15346	0		11.3548
8224	Regions/clus2	30088	15346	0		11.9426
8225	Regions/clus2	30168	15346	0		13.7928
8226	Regions/clus2	30248	15346	0		14.2084
8229	Regions/clus2	30488	15346	0		12.5997
8230	Regions/clus2	30568	15346	0		9.94597
8231	Regions/clus2	30648	15346	0		13.2964
8232	Regions/clus2	30728	15346	0		11.8153
8233	Regions/clus2	30808	15346	0		11.7903
8235	Regions/clus2	30968	15346	0		12.7043
8243	Regions/clus2	31608	15346	0		14.4856
8244	Regions/clus2	31688	15346	0		11.9192
8245	Regions/clus2	31768	15346	0		10.6262
8246	Regions/clus2	31848	15346	0		11.0389
8247	Regions/clus2	31928	15346	0		11.6902
8291	Regions/clus2	26568	15266	0		11.4344
8292	Regions/clus2	26648	15266	0		12.5569
8293	Regions/clus2	26728	15266	0		10.794
8295	Regions/clus2	26888	15266	0		13.0625
8297	Regions/clus2	27048	15266	0		10.193
8298	Regions/clus2	27128	15266	0		10.954
8300	Regions/clus2	27288	15266	0		9.8404
8306	Regions/clus2	27768	15266	0		14.543
8315	Regions/clus2	28488	15266	0		15.084
8316	Regions/clus2	28568	15266	0		15.0983
8317	Regions/clus2	28648	15266	0		15.486
8319	Regions/clus2	28808	15266	0		13.7009
8320	Regions/clus2	28888	15266	0		12.6176
8321	Regions/clus2	28968	15266	0		11.4282
8338	Regions/clus2	30328	15266	0		11.8257
8339	Regions/clus2	30408	15266	0		13.3736
8341	Regions/clus2	30568	15266	0		12.1767
8342	Regions/clus2	30648	15266	0		11.0978
8343	Regions/clus2	30728	15266	0		11.9109
8344	Regions/clus2	30808	15266	0		10.0871
8346	Regions/clus2	30968	15266	0		12.3347
8347	Regions/clus2	31048	15266	0		10.3745
8349	Regions/clus2	31208	15266	0		14.936
8352	Regions/clus2	31448	15266	0		13.022
8356	Regions/clus2	31768	15266	0		12.9948
8357	Regions/clus2	31848	15266	0		11.0296
8358	Regions/clus2	31928	15266	0		9.02642
8359	Regions/clus2	32008	15266	0		10.0227
8360	Regions/clus2	32088	15266	0		9.36324
8403	Regions/clus2	26488	15186	0		10.3147
8404	Regions/clus2	26568	15186	0		12.3618
8405	Regions/clus2	26648	15186	0		10.0744
8409	Regions/clus2	26968	15186	0		9.60756
8413	Regions/clus2	27288	15186	0		12.5096
8417	Regions/clus2	27608	15186	0		14.9537
8418	Regions/clus2	27688	15186	0		15.6524
8432	Regions/clus2	28808	15186	0		10.6232
8436	Regions/clus2	29128	15186	0		13.0394
8454	Regions/clus2	30568	15186	0		11.6447
8455	Regions/clus2	30648	15186	0		9.15446
8456	Regions/clus2	30728	15186	0		9.54596
8458	Regions/clus2	30888	15186	0		12.4722
8460	Regions/clus2	31048	15186	0		12.8567
8461	Regions/clus2	31128	15186	0		12.0793
8462	Regions/clus2	31208	15186	0		10.7253
8471	Regions/clus2	31928	15186	0		9.11954
8472	Regions/clus2	32008	15186	0		10.3951
8473	Regions/clus2	32088	15186	0		10.9211
8474	Regions/clus2	32168	15186	0		11.0213
8516	Regions/clus2	26408	15106	0		7.51347
8517	Regions/clus2	26488	15106	0		9.69895
8519	Regions/clus2	26648	15106	0		10.2256
8520	Regions/clus2	26728	15106	0		12.1175
8525	Regions/clus2	27128	15106	0		10.1868
8531	Regions/clus2	27608	15106	0		11.6486
8532	Regions/clus2	27688	15106	0		11.6266
8550	Regions/clus2	29128	15106	0		12.3558
8551	Regions/clus2	29208	15106	0		13.3605
8552	Regions/clus2	29288	15106	0		10.7436
8553	Regions/clus2	29368	15106	0		11.3324
8554	Regions/clus2	29448	15106	0		10.4707
8555	Regions/clus2	29528	15106	0		10.2679
8556	Regions/clus2	29608	15106	0		12.0208
8570	Regions/clus2	30728	15106	0		9.2961
8571	Regions/clus2	30808	15106	0		12.2991
8573	Regions/clus2	30968	15106	0		10.8775
8575	Regions/clus2	31128	15106	0		12.5501
8576	Regions/clus2	31208	15106	0		11.5164
8579	Regions/clus2	31448	15106	0		10.0978
8585	Regions/clus2	31928	15106	0		9.74573
8586	Regions/clus2	32008	15106	0		11.6208
8587	Regions/clus2	32088	15106	0		10.1145
8588	Regions/clus2	32168	15106	0		11.4738
8589	Regions/clus2	32248	15106	0		9.92362
8631	Regions/clus2	26328	15026	0		9.72552
8632	Regions/clus2	26408	15026	0		11.5354
8633	Regions/clus2	26488	15026	0		9.84555
8639	Regions/clus2	26968	15026	0		11.4987
8643	Regions/clus2	27288	15026	0		11.9252
8659	Regions/clus2	28568	15026	0		13.3337
8665	Regions/clus2	29048	15026	0		11.3332
8666	Regions/clus2	29128	15026	0		9.95897
8667	Regions/clus2	29208	15026	0		8.53379
8668	Regions/clus2	29288	15026	0		11.3239
8669	Regions/clus2	29368	15026	0		11.19
8670	Regions/clus2	29448	15026	0		12.067
8672	Regions/clus2	29608	15026	0		11.1109
8673	Regions/clus2	29688	15026	0		8.42832
8686	Regions/clus2	30728	15026	0		10.2145
8687	Regions/clus2	30808	15026	0		9.38084
8690	Regions/clus2	31048	15026	0		10.5724
8692	Regions/clus2	31208	15026	0		11.4216
8696	Regions/clus2	31528	15026	0		11.761
8704	Regions/clus2	32168	15026	0		10.6444
8705	Regions/clus2	32248	15026	0		9.32771
8747	Regions/clus2	26248	14946	0		9.19991
8748	Regions/clus2	26328	14946	0		8.76267
8763	Regions/clus2	27528	14946	0		11.3221
8771	Regions/clus2	28168	14946	0		11.9213
8772	Regions/clus2	28248	14946	0		11.1192
8773	Regions/clus2	28328	14946	0		14.7211
8774	Regions/clus2	28408	14946	0		12.1556
8775	Regions/clus2	28488	14946	0		10.4249
8783	Regions/clus2	29128	14946	0		10.9277
8784	Regions/clus2	29208	14946	0		12.0981
8785	Regions/clus2	29288	14946	0		10.0936
8786	Regions/clus2	29368	14946	0		10.752
8787	Regions/clus2	29448	14946	0		10.1353
8788	Regions/clus2	29528	14946	0		9.13273
8789	Regions/clus2	29608	14946	0		11.7509
8793	Regions/clus2	29928	14946	0		9.30989
8795	Regions/clus2	30088	14946	0		13.4494
8804	Regions/clus2	30808	14946	0		8.34692
8809	Regions/clus2	31208	14946	0		12.3023
8813	Regions/clus2	31528	14946	0		11.5695
8815	Regions/clus2	31688	14946	0		11.6928
8822	Regions/clus2	32248	14946	0		9.37394
8823	Regions/clus2	32328	14946	0		9.59215
8863	Regions/clus2	26088	14866	0		10.0757
8864	Regions/clus2	26168	14866	0		9.13751
8865	Regions/clus2	26248	14866	0		9.57253
8870	Regions/clus2	26648	14866	0		10.1597
8880	Regions/clus2	27448	14866	0		10.1762
8902	Regions/clus2	29208	14866	0		9.27453
8903	Regions/clus2	29288	14866	0		11.2033
8904	Regions/clus2	29368	14866	0		8.8213
8906	Regions/clus2	29528	14866	0		9.25315
8908	Regions/clus2	29688	14866	0		9.49709
8915	Regions/clus2	30248	14866	0		9.10923
8923	Regions/clus2	30888	14866	0		8.54604
8926	Regions/clus2	31128	14866	0		11.435
8927	Regions/clus2	31208	14866	0		11.1574
8928	Regions/clus2	31288	14866	0		10.1509
8942	Regions/clus2	32408	14866	0		8.89424
8981	Regions/clus2	26088	14786	0		9.44693
8982	Regions/clus2	26168	14786	0		10.1308
8993	Regions/clus2	27048	14786	0		11.3398
8997	Regions/clus2	27368	14786	0		12.1445
9004	Regions/clus2	27928	14786	0		11.7679
9005	Regions/clus2	28008	14786	0		14.2039
9006	Regions/clus2	28088	14786	0		12.0443
9007	Regions/clus2	28168	14786	0		11.003
9014	Regions/clus2	28728	14786	0		9.80729
9024	Regions/clus2	29528	14786	0		8.41674
9032	Regions/clus2	30168	14786	0		9.93296
9035	Regions/clus2	30408	14786	0		9.09014
9041	Regions/clus2	30888	14786	0		10.1261
9042	Regions/clus2	30968	14786	0		8.43715
9045	Regions/clus2	31208	14786	0		10.4305
9046	Regions/clus2	31288	14786	0		11.05
9048	Regions/clus2	31448	14786	0		10.1954
9053	Regions/clus2	31848	14786	0		10.3527
9061	Regions/clus2	32488	14786	0		8.97242
9099	Regions/clus2	26008	14706	0		8.12688
9100	Regions/clus2	26088	14706	0		12.0749
9101	Regions/clus2	26168	14706	0		10.071
9109	Regions/clus2	26808	14706	0		9.8472
9115	Regions/clus2	27288	14706	0		10.2805
9116	Regions/clus2	27368	14706	0		12.5346
9117	Regions/clus2	27448	14706	0		11.3942
9122	Regions/clus2	27848	14706	0		12.1844
9123	Regions/clus2	27928	14706	0		12.594
9124	Regions/clus2	28008	14706	0		14.1321
9133	Regions/clus2	28728	14706	0		11.3734
9134	Regions/clus2	28808	14706	0		8.82436
9136	Regions/clus2	28968	14706	0		9.5087
9143	Regions/clus2	29528	14706	0		9.16081
9155	Regions/clus2	30488	14706	0		8.71945
9156	Regions/clus2	30568	14706	0		9.18319
9157	Regions/clus2	30648	14706	0		8.7962
9158	Regions/clus2	30728	14706	0		7.36789
9159	Regions/clus2	30808	14706	0		7.60762
9160	Regions/clus2	30888	14706	0		7.80651
9161	Regions/clus2	30968	14706	0		6.17814
9217	Regions/clus2	25928	14626	0		9.59793
9218	Regions/clus2	26008	14626	0		11.4708
9228	Regions/clus2	26808	14626	0		11.4116
9230	Regions/clus2	26968	14626	0		10.3008
9232	Regions/clus2	27128	14626	0		11.3258
9234	Regions/clus2	27288	14626	0		12.4333
9235	Regions/clus2	27368	14626	0		10.1511
9236	Regions/clus2	27448	14626	0		11.8591
9237	Regions/clus2	27528	14626	0		11.5861
9238	Regions/clus2	27608	14626	0		11.1158
9239	Regions/clus2	27688	14626	0		11.9381
9240	Regions/clus2	27768	14626	0		12.3301
9242	Regions/clus2	27928	14626	0		12.6213
9243	Regions/clus2	28008	14626	0		11.6171
9246	Regions/clus2	28248	14626	0		11.8838
9254	Regions/clus2	28888	14626	0		8.59753
9263	Regions/clus2	29608	14626	0		8.08283
9272	Regions/clus2	30328	14626	0		8.67601
9274	Regions/clus2	30488	14626	0		8.89699
9275	Regions/clus2	30568	14626	0		8.97479
9276	Regions/clus2	30648	14626	0		8.932
9278	Regions/clus2	30808	14626	0		9.17107
9279	Regions/clus2	30888	14626	0		8.65065
9280	Regions/clus2	30968	14626	0		9.2525
9285	Regions/clus2	31368	14626	0		12.2368
9335	Regions/clus2	25848	14546	0		9.26674
9336	Regions/clus2	25928	14546	0		7.80475
9346	Regions/clus2	26728	14546	0		9.89722
9352	Regions/clus2	27208	14546	0		13.7714
9353	Regions/clus2	27288	14546	0		10.9029
9354	Regions/clus2	27368	14546	0		11.2633
9356	Regions/clus2	27528	14546	0		10.519
9357	Regions/clus2	27608	14546	0		13.9473
9358	Regions/clus2	27688	14546	0		10.6285
9359	Regions/clus2	27768	14546	0		13.2029
9360	Regions/clus2	27848	14546	0		10.7847
9361	Regions/clus2	27928	14546	0		12.1776
9362	Regions/clus2	28008	14546	0		12.3861
9364	Regions/clus2	28168	14546	0		10.2541
9395	Regions/clus2	30648	14546	0		9.24201
9396	Regions/clus2	30728	14546	0		8.375
9397	Regions/clus2	30808	14546	0		10.857
9398	Regions/clus2	30888	14546	0		8.92982
9399	Regions/clus2	30968	14546	0		9.6356
9403	Regions/clus2	31288	14546	0		11.0641
9404	Regions/clus2	31368	14546	0		9.83337
9405	Regions/clus2	31448	14546	0		11.3596
9407	Regions/clus2	31608	14546	0		9.50912
9454	Regions/clus2	25848	14466	0		9.82857
9462	Regions/clus2	26488	14466	0		8.49343
9464	Regions/clus2	26648	14466	0		9.50675
9465	Regions/clus2	26728	14466	0		9.58484
9473	Regions/clus2	27368	14466	0		13.1423
9475	Regions/clus2	27528	14466	0		11.829
9477	Regions/clus2	27688	14466	0		12.8035
9478	Regions/clus2	27768	14466	0		11.6521
9480	Regions/clus2	27928	14466	0		12.8248
9481	Regions/clus2	28008	14466	0		10.6132
9482	Regions/clus2	28088	14466	0		12.5303
9510	Regions/clus2	30328	14466	0		9.67532
9512	Regions/clus2	30488	14466	0		9.91275
9514	Regions/clus2	30648	14466	0		7.97584
9515	Regions/clus2	30728	14466	0		9.8923
9516	Regions/clus2	30808	14466	0		10.6962
9523	Regions/clus2	31368	14466	0		10.7455
9528	Regions/clus2	31768	14466	0		10.0122
9529	Regions/clus2	31848	14466	0		8.24661
9533	Regions/clus2	32168	14466	0		9.35453
9584	Regions/clus2	26568	14386	0		9.46785
9585	Regions/clus2	26648	14386	0		8.51334
9586	Regions/clus2	26728	14386	0		9.20033
9597	Regions/clus2	27608	14386	0		13.9758
9598	Regions/clus2	27688	14386	0		14.6654
9600	Regions/clus2	27848	14386	0		10.4452
9601	Regions/clus2	27928	14386	0		10.7507
9632	Regions/clus2	30408	14386	0		8.58811
9633	Regions/clus2	30488	14386	0		9.36681
9634	Regions/clus2	30568	14386	0		8.55632
9635	Regions/clus2	30648	14386	0		9.65515
9637	Regions/clus2	30808	14386	0		11.1279
9638	Regions/clus2	30888	14386	0		11.9126
9695	Regions/clus2	25768	14306	0		13.3426
9702	Regions/clus2	26328	14306	0		9.30065
9706	Regions/clus2	26648	14306	0		11.0826
9707	Regions/clus2	26728	14306	0		8.67396
9708	Regions/clus2	26808	14306	0		9.8716
9716	Regions/clus2	27448	14306	0		13.9997
9717	Regions/clus2	27528	14306	0		11.7031
9718	Regions/clus2	27608	14306	0		13.5636
9719	Regions/clus2	27688	14306	0		11.2873
9720	Regions/clus2	27768	14306	0		11.5905
9721	Regions/clus2	27848	14306	0		9.53285
9722	Regions/clus2	27928	14306	0		12.5215
9723	Regions/clus2	28008	14306	0		10.6933
9753	Regions/clus2	30408	14306	0		9.28626
9754	Regions/clus2	30488	14306	0		9.48054
9756	Regions/clus2	30648	14306	0		8.36435
9757	Regions/clus2	30728	14306	0		10.3329
9758	Regions/clus2	30808	14306	0		10.1758
9759	Regions/clus2	30888	14306	0		8.5013
9760	Regions/clus2	30968	14306	0		9.9882
9767	Regions/clus2	31528	14306	0		9.07453
9768	Regions/clus2	31608	14306	0		12.6911
9825	Regions/clus2	26488	14226	0		10.5608
9827	Regions/clus2	26648	14226	0		9.99251
9829	Regions/clus2	26808	14226	0		8.41475
9835	Regions/clus2	27288	14226	0		9.36807
9836	Regions/clus2	27368	14226	0		13.1646
9837	Regions/clus2	27448	14226	0		11.5991
9838	Regions/clus2	27528	14226	0		10.6427
9839	Regions/clus2	27608	14226	0		9.47708
9840	Regions/clus2	27688	14226	0		9.47731
9841	Regions/clus2	27768	14226	0		10.7476
9843	Regions/clus2	27928	14226	0		10.07
9844	Regions/clus2	28008	14226	0		10.1379
9876	Regions/clus2	30568	14226	0		8.58499
9877	Regions/clus2	30648	14226	0		8.77437
9879	Regions/clus2	30808	14226	0		11.1951
9880	Regions/clus2	30888	14226	0		10.689
9881	Regions/clus2	30968	14226	0		8.27816
9886	Regions/clus2	31368	14226	0		8.12563
9892	Regions/clus2	31848	14226	0		10.3948
9936	Regions/clus2	25608	14146	0		8.25913
9950	Regions/clus2	26728	14146	0		9.4077
9951	Regions/clus2	26808	14146	0		10.1461
9956	Regions/clus2	27208	14146	0		8.37789
9957	Regions/clus2	27288	14146	0		9.75667
9958	Regions/clus2	27368	14146	0		11.7257
9959	Regions/clus2	27448	14146	0		13.5669
9961	Regions/clus2	27608	14146	0		11.972
9962	Regions/clus2	27688	14146	0		10.1506
9963	Regions/clus2	27768	14146	0		12.4062
9966	Regions/clus2	28008	14146	0		11.3663
9973	Regions/clus2	28568	14146	0		10.8675
9997	Regions/clus2	30488	14146	0		9.02828
9999	Regions/clus2	30648	14146	0		10.3876
10001	Regions/clus2	30808	14146	0		10.3359
10002	Regions/clus2	30888	14146	0		9.93387
10003	Regions/clus2	30968	14146	0		8.84762
10010	Regions/clus2	31528	14146	0		11.182
10012	Regions/clus2	31688	14146	0		8.37238
10074	Regions/clus2	26888	14066	0		10.5154
10079	Regions/clus2	27288	14066	0		12.9324
10080	Regions/clus2	27368	14066	0		11.0345
10082	Regions/clus2	27528	14066	0		11.1627
10083	Regions/clus2	27608	14066	0		10.8186
10084	Regions/clus2	27688	14066	0		11.5613
10086	Regions/clus2	27848	14066	0		11.2013
10087	Regions/clus2	27928	14066	0		10.2187
10088	Regions/clus2	28008	14066	0		12.0881
10093	Regions/clus2	28408	14066	0		10.3974
10114	Regions/clus2	30088	14066	0		7.12568
10120	Regions/clus2	30568	14066	0		9.0833
10121	Regions/clus2	30648	14066	0		7.89261
10122	Regions/clus2	30728	14066	0		8.03357
10124	Regions/clus2	30888	14066	0		7.37376
10125	Regions/clus2	30968	14066	0		7.59127
10130	Regions/clus2	31368	14066	0		11.2711
10138	Regions/clus2	32008	14066	0		11.1384
10196	Regions/clus2	26808	13986	0		9.59344
10203	Regions/clus2	27368	13986	0		10.7558
10204	Regions/clus2	27448	13986	0		12.0443
10205	Regions/clus2	27528	13986	0		10.3806
10207	Regions/clus2	27688	13986	0		10.0222
10208	Regions/clus2	27768	13986	0		11.5676
10210	Regions/clus2	27928	13986	0		7.57629
10211	Regions/clus2	28008	13986	0		9.74921
10212	Regions/clus2	28088	13986	0		10.6684
10242	Regions/clus2	30488	13986	0		9.08977
10244	Regions/clus2	30648	13986	0		8.48942
10246	Regions/clus2	30808	13986	0		10.3049
10248	Regions/clus2	30968	13986	0		8.27454
10260	Regions/clus2	31928	13986	0		7.95252
10325	Regions/clus2	27288	13906	0		11.3469
10326	Regions/clus2	27368	13906	0		11.5548
10328	Regions/clus2	27528	13906	0		10.4896
10329	Regions/clus2	27608	13906	0		10.2221
10330	Regions/clus2	27688	13906	0		9.61143
10331	Regions/clus2	27768	13906	0		9.5476
10332	Regions/clus2	27848	13906	0		11.3301
10333	Regions/clus2	27928	13906	0		11.2488
10334	Regions/clus2	28008	13906	0		9.12349
10342	Regions/clus2	28648	13906	0		10.9004
10362	Regions/clus2	30248	13906	0		8.65614
10366	Regions/clus2	30568	13906	0		9.29095
10368	Regions/clus2	30728	13906	0		10.1487
10369	Regions/clus2	30808	13906	0		8.19687
10370	Regions/clus2	30888	13906	0		8.66362
10371	Regions/clus2	30968	13906	0		8.9135
10378	Regions/clus2	31528	13906	0		6.65063
10379	Regions/clus2	31608	13906	0		9.18684
10380	Regions/clus2	31688	13906	0		8.18282
10444	Regions/clus2	26888	13826	0		10.8255
10450	Regions/clus2	27368	13826	0		12.7252
10451	Regions/clus2	27448	13826	0		11.2428
10452	Regions/clus2	27528	13826	0		11.0081
10453	Regions/clus2	27608	13826	0		9.95955
10455	Regions/clus2	27768	13826	0		8.65266
10456	Regions/clus2	27848	13826	0		10.0878
10457	Regions/clus2	27928	13826	0		9.48216
10459	Regions/clus2	28088	13826	0		9.01363
10491	Regions/clus2	30648	13826	0		9.71767
10492	Regions/clus2	30728	13826	0		8.43098
10494	Regions/clus2	30888	13826	0		10.3928
10495	Regions/clus2	30968	13826	0		8.85934
10500	Regions/clus2	31368	13826	0		9.15931
10569	Regions/clus2	26968	13746	0		15.6574
10570	Regions/clus2	27048	13746	0		10.7952
10575	Regions/clus2	27448	13746	0		9.56034
10576	Regions/clus2	27528	13746	0		9.58771
10577	Regions/clus2	27608	13746	0		8.30478
10578	Regions/clus2	27688	13746	0		10.3683
10579	Regions/clus2	27768	13746	0		11.6303
10580	Regions/clus2	27848	13746	0		11.8526
10581	Regions/clus2	27928	13746	0		10.562
10590	Regions/clus2	28648	13746	0		11.501
10607	Regions/clus2	30008	13746	0		8.31801
10617	Regions/clus2	30808	13746	0		7.79351
10618	Regions/clus2	30888	13746	0		8.39579
10624	Regions/clus2	31368	13746	0		8.61299
10626	Regions/clus2	31528	13746	0		10.552
10690	Regions/clus2	26808	13666	0		10.1797
10693	Regions/clus2	27048	13666	0		11.2398
10698	Regions/clus2	27448	13666	0		12.664
10699	Regions/clus2	27528	13666	0		13.4758
10700	Regions/clus2	27608	13666	0		9.48842
10701	Regions/clus2	27688	13666	0		10.5902
10702	Regions/clus2	27768	13666	0		13.3204
10703	Regions/clus2	27848	13666	0		10.1346
10704	Regions/clus2	27928	13666	0		10.0452
10705	Regions/clus2	28008	13666	0		9.62062
10706	Regions/clus2	28088	13666	0		8.85746
10713	Regions/clus2	28648	13666	0		10.7126
10731	Regions/clus2	30088	13666	0		8.66375
10732	Regions/clus2	30168	13666	0		8.9316
10734	Regions/clus2	30328	13666	0		9.46142
10737	Regions/clus2	30568	13666	0		8.69108
10738	Regions/clus2	30648	13666	0		7.86531
10739	Regions/clus2	30728	13666	0		8.35966
10741	Regions/clus2	30888	13666	0		8.54134
10746	Regions/clus2	31288	13666	0		9.73213
10747	Regions/clus2	31368	13666	0		11.303
10748	Regions/clus2	31448	13666	0		7.10766
10811	Regions/clus2	26728	13586	0		9.17867
10816	Regions/clus2	27128	13586	0		8.73006
10820	Regions/clus2	27448	13586	0		13.517
10821	Regions/clus2	27528	13586	0		13.8806
10822	Regions/clus2	27608	13586	0		8.53304
10823	Regions/clus2	27688	13586	0		10.1959
10824	Regions/clus2	27768	13586	0		11.3593
10827	Regions/clus2	28008	13586	0		14.5458
10828	Regions/clus2	28088	13586	0		11.1159
10830	Regions/clus2	28248	13586	0		10.3548
10858	Regions/clus2	30488	13586	0		9.15305
10859	Regions/clus2	30568	13586	0		7.84886
10862	Regions/clus2	30808	13586	0		8.57746
10863	Regions/clus2	30888	13586	0		8.02064
10870	Regions/clus2	31448	13586	0		9.69989
10871	Regions/clus2	31528	13586	0		8.3619
10933	Regions/clus2	26728	13506	0		8.52426
10934	Regions/clus2	26808	13506	0		9.79021
10935	Regions/clus2	26888	13506	0		9.02921
10936	Regions/clus2	26968	13506	0		9.14125
10942	Regions/clus2	27448	13506	0		10.2165
10944	Regions/clus2	27608	13506	0		15.0388
10945	Regions/clus2	27688	13506	0		13.3033
10946	Regions/clus2	27768	13506	0		12.898
10947	Regions/clus2	27848	13506	0		12.8377
10948	Regions/clus2	27928	13506	0		11.9457
10953	Regions/clus2	28328	13506	0		8.98351
10954	Regions/clus2	28408	13506	0		9.46448
10977	Regions/clus2	30248	13506	0		9.06334
10978	Regions/clus2	30328	13506	0		10.2944
10981	Regions/clus2	30568	13506	0		11.5202
10982	Regions/clus2	30648	13506	0		7.07105
10984	Regions/clus2	30808	13506	0		8.66544
10985	Regions/clus2	30888	13506	0		8.73801
10986	Regions/clus2	30968	13506	0		9.76569
10990	Regions/clus2	31288	13506	0		9.30991
10991	Regions/clus2	31368	13506	0		10.825
10993	Regions/clus2	31528	13506	0		8.27046
11054	Regions/clus2	26728	13426	0		8.54349
11055	Regions/clus2	26808	13426	0		9.58514
11056	Regions/clus2	26888	13426	0		8.80172
11057	Regions/clus2	26968	13426	0		8.83385
11060	Regions/clus2	27208	13426	0		12.7675
11063	Regions/clus2	27448	13426	0		10.9121
11067	Regions/clus2	27768	13426	0		11.0184
11068	Regions/clus2	27848	13426	0		10.7341
11069	Regions/clus2	27928	13426	0		14.9658
11071	Regions/clus2	28088	13426	0		10.3028
11073	Regions/clus2	28248	13426	0		12.1206
11080	Regions/clus2	28808	13426	0		10.5411
11081	Regions/clus2	28888	13426	0		10.0314
11082	Regions/clus2	28968	13426	0		8.99265
11091	Regions/clus2	29688	13426	0		8.15142
11092	Regions/clus2	29768	13426	0		7.37903
11100	Regions/clus2	30408	13426	0		8.21639
11102	Regions/clus2	30568	13426	0		8.86059
11103	Regions/clus2	30648	13426	0		7.55796
11104	Regions/clus2	30728	13426	0		9.07311
11105	Regions/clus2	30808	13426	0		7.47337
11106	Regions/clus2	30888	13426	0		6.9092
11107	Regions/clus2	30968	13426	0		8.7895
11112	Regions/clus2	31368	13426	0		7.6771
11113	Regions/clus2	31448	13426	0		11.0871
11114	Regions/clus2	31528	13426	0		9.78545
11175	Regions/clus2	26808	13346	0		8.35134
11177	Regions/clus2	26968	13346	0		10.9351
11178	Regions/clus2	27048	13346	0		12.4603
11179	Regions/clus2	27128	13346	0		9.51407
11187	Regions/clus2	27768	13346	0		15.0078
11188	Regions/clus2	27848	13346	0		20.0056
11189	Regions/clus2	27928	13346	0		15.5735
11190	Regions/clus2	28008	13346	0		11.7967
11191	Regions/clus2	28088	13346	0		11.3996
11192	Regions/clus2	28168	13346	0		10.8473
11196	Regions/clus2	28488	13346	0		9.7173
11200	Regions/clus2	28808	13346	0		9.7654
11201	Regions/clus2	28888	13346	0		9.41173
11202	Regions/clus2	28968	13346	0		8.51433
11203	Regions/clus2	29048	13346	0		8.44995
11212	Regions/clus2	29768	13346	0		7.50878
11223	Regions/clus2	30648	13346	0		7.43119
11224	Regions/clus2	30728	13346	0		8.25283
11225	Regions/clus2	30808	13346	0		6.94512
11230	Regions/clus2	31208	13346	0		8.28129
11231	Regions/clus2	31288	13346	0		8.54283
11233	Regions/clus2	31448	13346	0		12.5494
11236	Regions/clus2	31688	13346	0		7.94842
11297	Regions/clus2	27048	13266	0		10.23
11298	Regions/clus2	27128	13266	0		10.0469
11301	Regions/clus2	27368	13266	0		10.1747
11307	Regions/clus2	27848	13266	0		12.506
11308	Regions/clus2	27928	13266	0		13.322
11309	Regions/clus2	28008	13266	0		11.494
11310	Regions/clus2	28088	13266	0		11.219
11311	Regions/clus2	28168	13266	0		11.76
11312	Regions/clus2	28248	13266	0		8.20123
11314	Regions/clus2	28408	13266	0		8.35076
11332	Regions/clus2	29848	13266	0		11.3367
11337	Regions/clus2	30248	13266	0		6.87111
11339	Regions/clus2	30408	13266	0		7.79859
11340	Regions/clus2	30488	13266	0		6.48612
11341	Regions/clus2	30568	13266	0		9.23366
11342	Regions/clus2	30648	13266	0		7.50641
11343	Regions/clus2	30728	13266	0		7.27118
11349	Regions/clus2	31208	13266	0		8.88622
11350	Regions/clus2	31288	13266	0		8.61677
11352	Regions/clus2	31448	13266	0		8.74852
11354	Regions/clus2	31608	13266	0		8.00558
11415	Regions/clus2	26968	13186	0		9.6744
11419	Regions/clus2	27288	13186	0		14.8726
11420	Regions/clus2	27368	13186	0		8.6555
11421	Regions/clus2	27448	13186	0		9.09754
11422	Regions/clus2	27528	13186	0		10.1017
11423	Regions/clus2	27608	13186	0		12.977
11427	Regions/clus2	27928	13186	0		10.8168
11428	Regions/clus2	28008	13186	0		8.85097
11429	Regions/clus2	28088	13186	0		9.92425
11460	Regions/clus2	30568	13186	0		7.21692
11461	Regions/clus2	30648	13186	0		5.72496
11462	Regions/clus2	30728	13186	0		6.98183
11464	Regions/clus2	30888	13186	0		7.83572
11465	Regions/clus2	30968	13186	0		6.8228
11466	Regions/clus2	31048	13186	0		7.59239
11467	Regions/clus2	31128	13186	0		7.42717
11469	Regions/clus2	31288	13186	0		8.37367
11533	Regions/clus2	26968	13106	0		10.5089
11538	Regions/clus2	27368	13106	0		9.85839
11541	Regions/clus2	27608	13106	0		8.88072
11542	Regions/clus2	27688	13106	0		10.3041
11543	Regions/clus2	27768	13106	0		10.7403
11548	Regions/clus2	28168	13106	0		8.47195
11580	Regions/clus2	30728	13106	0		6.22819
11581	Regions/clus2	30808	13106	0		7.68507
11582	Regions/clus2	30888	13106	0		8.38763
11583	Regions/clus2	30968	13106	0		8.52422
11584	Regions/clus2	31048	13106	0		7.53678
11585	Regions/clus2	31128	13106	0		7.60583
11587	Regions/clus2	31288	13106	0		7.31283
11588	Regions/clus2	31368	13106	0		7.22861
11654	Regions/clus2	27288	13026	0		8.65595
11657	Regions/clus2	27528	13026	0		10.0558
11658	Regions/clus2	27608	13026	0		8.40453
11659	Regions/clus2	27688	13026	0		10.9465
11660	Regions/clus2	27768	13026	0		9.48017
11661	Regions/clus2	27848	13026	0		9.01499
11696	Regions/clus2	30648	13026	0		7.03651
11698	Regions/clus2	30808	13026	0		5.56319
11700	Regions/clus2	30968	13026	0		7.38081
11701	Regions/clus2	31048	13026	0		7.89419
11703	Regions/clus2	31208	13026	0		7.70184
11772	Regions/clus2	27368	12946	0		8.46332
11773	Regions/clus2	27448	12946	0		6.69505
11774	Regions/clus2	27528	12946	0		7.9808
11776	Regions/clus2	27688	12946	0		9.16041
11777	Regions/clus2	27768	12946	0		9.09799
11815	Regions/clus2	30808	12946	0		7.47544
11818	Regions/clus2	31048	12946	0		6.18999
11819	Regions/clus2	31128	12946	0		8.24547
11891	Regions/clus2	27688	12866	0		9.12106
11892	Regions/clus2	27768	12866	0		7.11051
11893	Regions/clus2	27848	12866	0		8.97026
11894	Regions/clus2	27928	12866	0		7.00526
11929	Regions/clus2	30728	12866	0		6.90931
11930	Regions/clus2	30808	12866	0		5.71723
12003	Regions/clus2	27448	12786	0		7.94932
12012	Regions/clus2	28168	12786	0		8.10786
12042	Regions/clus2	30568	12786	0		6.08265
12045	Regions/clus2	30808	12786	0		6.56948
12120	Regions/clus2	27688	12706	0		8.0314
12123	Regions/clus2	27928	12706	0		6.8387
12124	Regions/clus2	28008	12706	0		6.05036
12236	Regions/clus2	27848	12626	0		6.6368
12352	Regions/clus2	28088	12546	0		5.8994
12384	Regions/clus2	30648	12546	0		7.12349
12385	Regions/clus2	30728	12546	0		7.39564
12387	Regions/clus2	30888	12546	0		7.63976
12460	Regions/clus2	27768	12466	0		7.39769
12503	Regions/clus2	31208	12466	0		7.39474
12567	Regions/clus2	27448	12386	0		6.68819
12571	Regions/clus2	27768	12386	0		6.10476
12572	Regions/clus2	27848	12386	0		7.24119
12609	Regions/clus2	30808	12386	0		8.81363
12610	Regions/clus2	30888	12386	0		10.1236
12611	Regions/clus2	30968	12386	0		7.83924
12614	Regions/clus2	31208	12386	0		8.0343
12681	Regions/clus2	27768	12306	0		6.30949
12682	Regions/clus2	27848	12306	0		6.65781
12683	Regions/clus2	27928	12306	0		7.81136
12689	Regions/clus2	28408	12306	0		7.31213
12719	Regions/clus2	30808	12306	0		8.82754
12720	Regions/clus2	30888	12306	0		8.39477
12724	Regions/clus2	31208	12306	0		9.01447
12791	Regions/clus2	27848	12226	0		6.7578
12792	Regions/clus2	27928	12226	0		6.89966
12794	Regions/clus2	28088	12226	0		5.95196
12822	Regions/clus2	30328	12226	0		10.0493
12828	Regions/clus2	30808	12226	0		8.59775
12829	Regions/clus2	30888	12226	0		7.59057
12899	Regions/clus2	27848	12146	0		7.97836
12931	Regions/clus2	30408	12146	0		9.78113
12936	Regions/clus2	30808	12146	0		8.31868
12937	Regions/clus2	30888	12146	0		9.97628
13007	Regions/clus2	27928	12066	0		8.81425
13042	Regions/clus2	30728	12066	0		8.75976
13043	Regions/clus2	30808	12066	0		9.17044
13113	Regions/clus2	27928	11986	0		8.93081
13114	Regions/clus2	28008	11986	0		7.47688
13145	Regions/clus2	30488	11986	0		9.29368
13146	Regions/clus2	30568	11986	0		9.24869
13147	Regions/clus2	30648	11986	0		9.5034
13151	Regions/clus2	30968	11986	0		13.0241
13219	Regions/clus2	28008	11906	0		9.27858
13220	Regions/clus2	28088	11906	0		9.48245
13253	Regions/clus2	30728	11906	0		8.31139
13254	Regions/clus2	30808	11906	0		6.06645
13255	Regions/clus2	30888	11906	0		8.5151
13256	Regions/clus2	30968	11906	0		6.89839
13257	Regions/clus2	31048	11906	0		5.9511
13258	Regions/clus2	31128	11906	0		6.47043
13318	Regions/clus2	27608	11826	0		9.11347
13324	Regions/clus2	28088	11826	0		10.1545
13325	Regions/clus2	28168	11826	0		11.141
13326	Regions/clus2	28248	11826	0		10.2495
13352	Regions/clus2	30328	11826	0		7.57379
13353	Regions/clus2	30408	11826	0		6.47519
13354	Regions/clus2	30488	11826	0		5.62976
13355	Regions/clus2	30568	11826	0		6.00464
13356	Regions/clus2	30648	11826	0		7.21006
13357	Regions/clus2	30728	11826	0		6.49544
13358	Regions/clus2	30808	11826	0		9.00424
13359	Regions/clus2	30888	11826	0		7.85025
13360	Regions/clus2	30968	11826	0		7.09268
13362	Regions/clus2	31128	11826	0		10.8618
13420	Regions/clus2	27528	11746	0		11.1354
13422	Regions/clus2	27688	11746	0		10.5493
13426	Regions/clus2	28008	11746	0		11.5416
13436	Regions/clus2	28808	11746	0		10.6626
13437	Regions/clus2	28888	11746	0		10.8087
13449	Regions/clus2	29848	11746	0		10.4272
13450	Regions/clus2	29928	11746	0		7.56553
13451	Regions/clus2	30008	11746	0		5.81045
13452	Regions/clus2	30088	11746	0		6.97671
13453	Regions/clus2	30168	11746	0		8.07892
13454	Regions/clus2	30248	11746	0		7.24062
13455	Regions/clus2	30328	11746	0		6.9306
13456	Regions/clus2	30408	11746	0		8.62029
13457	Regions/clus2	30488	11746	0		5.17582
13506	Regions/clus2	27528	11666	0		8.3794
13507	Regions/clus2	27608	11666	0		9.26852
13508	Regions/clus2	27688	11666	0		7.68755
14501	Regions/clus2	16728	16466	0		9.80968
14520	Regions/clus2	18248	16466	0		11.6152
14592	Regions/clus2	16328	16386	0		10.2587
14593	Regions/clus2	16408	16386	0		9.92172
14594	Regions/clus2	16488	16386	0		9.64316
14595	Regions/clus2	16568	16386	0		9.77991
14596	Regions/clus2	16648	16386	0		10.9378
14597	Regions/clus2	16728	16386	0		11.6368
14598	Regions/clus2	16808	16386	0		11.8383
14612	Regions/clus2	17928	16386	0		11.7736
14613	Regions/clus2	18008	16386	0		11.4439
14614	Regions/clus2	18088	16386	0		12.3079
14615	Regions/clus2	18168	16386	0		15.0995
14616	Regions/clus2	18248	16386	0		11.5433
14617	Regions/clus2	18328	16386	0		12.8538
14618	Regions/clus2	18408	16386	0		10.2123
14619	Regions/clus2	18488	16386	0		11.0475
14683	Regions/clus2	15848	16306	0		9.32844
14684	Regions/clus2	15928	16306	0		9.31729
14685	Regions/clus2	16008	16306	0		10.2729
14687	Regions/clus2	16168	16306	0		9.85624
14688	Regions/clus2	16248	16306	0		9.96623
14689	Regions/clus2	16328	16306	0		9.95989
14690	Regions/clus2	16408	16306	0		12.3274
14691	Regions/clus2	16488	16306	0		12.0533
14692	Regions/clus2	16568	16306	0		11.4832
14694	Regions/clus2	16728	16306	0		10.8282
14696	Regions/clus2	16888	16306	0		11.468
14697	Regions/clus2	16968	16306	0		12.4059
14698	Regions/clus2	17048	16306	0		11.0804
14708	Regions/clus2	17848	16306	0		11.9279
14709	Regions/clus2	17928	16306	0		12.4305
14710	Regions/clus2	18008	16306	0		13.1506
14712	Regions/clus2	18168	16306	0		10.5675
14713	Regions/clus2	18248	16306	0		12.3968
14714	Regions/clus2	18328	16306	0		12.4732
14715	Regions/clus2	18408	16306	0		11.9153
14716	Regions/clus2	18488	16306	0		10.1511
14717	Regions/clus2	18568	16306	0		9.44973
14718	Regions/clus2	18648	16306	0		9.58608
14719	Regions/clus2	18728	16306	0		10.2632
14720	Regions/clus2	18808	16306	0		10.6877
14780	Regions/clus2	15768	16226	0		9.52873
14781	Regions/clus2	15848	16226	0		9.99633
14782	Regions/clus2	15928	16226	0		10.5313
14783	Regions/clus2	16008	16226	0		9.4791
14786	Regions/clus2	16248	16226	0		11.0152
14787	Regions/clus2	16328	16226	0		10.5638
14789	Regions/clus2	16488	16226	0		11.6383
14790	Regions/clus2	16568	16226	0		11.2112
14791	Regions/clus2	16648	16226	0		11.4577
14792	Regions/clus2	16728	16226	0		11.2603
14793	Regions/clus2	16808	16226	0		10.8562
14795	Regions/clus2	16968	16226	0		12.3527
14796	Regions/clus2	17048	16226	0		11.7318
14797	Regions/clus2	17128	16226	0		12.3427
14801	Regions/clus2	17448	16226	0		10.3946
14802	Regions/clus2	17528	16226	0		8.58556
14804	Regions/clus2	17688	16226	0		9.01098
14805	Regions/clus2	17768	16226	0		10.2719
14806	Regions/clus2	17848	16226	0		11.2899
14807	Regions/clus2	17928	16226	0		14.0837
14808	Regions/clus2	18008	16226	0		12.2231
14809	Regions/clus2	18088	16226	0		11.123
14810	Regions/clus2	18168	16226	0		10.1714
14811	Regions/clus2	18248	16226	0		12.3931
14812	Regions/clus2	18328	16226	0		11.2414
14813	Regions/clus2	18408	16226	0		10.2161
14815	Regions/clus2	18568	16226	0		9.72849
14816	Regions/clus2	18648	16226	0		9.30613
14817	Regions/clus2	18728	16226	0		8.50107
14818	Regions/clus2	18808	16226	0		9.69026
14819	Regions/clus2	18888	16226	0		9.37265
14820	Regions/clus2	18968	16226	0		9.79248
14821	Regions/clus2	19048	16226	0		10.7069
14822	Regions/clus2	19128	16226	0		10.1859
14823	Regions/clus2	19208	16226	0		10.7385
14876	Regions/clus2	15528	16146	0		8.43045
14877	Regions/clus2	15608	16146	0		9.39489
14879	Regions/clus2	15768	16146	0		9.7053
14883	Regions/clus2	16088	16146	0		9.61595
14884	Regions/clus2	16168	16146	0		10.2025
14885	Regions/clus2	16248	16146	0		10.1417
14891	Regions/clus2	16728	16146	0		9.38366
14892	Regions/clus2	16808	16146	0		11.7631
14893	Regions/clus2	16888	16146	0		11.1413
14894	Regions/clus2	16968	16146	0		10.6763
14895	Regions/clus2	17048	16146	0		11.0063
14896	Regions/clus2	17128	16146	0		12.1526
14897	Regions/clus2	17208	16146	0		11.9281
14898	Regions/clus2	17288	16146	0		13.1207
14899	Regions/clus2	17368	16146	0		12.3906
14900	Regions/clus2	17448	16146	0		9.47619
14901	Regions/clus2	17528	16146	0		12.2148
14902	Regions/clus2	17608	16146	0		13.729
14903	Regions/clus2	17688	16146	0		11.3966
14904	Regions/clus2	17768	16146	0		14.0518
14905	Regions/clus2	17848	16146	0		14.0293
14906	Regions/clus2	17928	16146	0		12.8209
14907	Regions/clus2	18008	16146	0		11.996
14908	Regions/clus2	18088	16146	0		13.2852
14915	Regions/clus2	18648	16146	0		9.85856
14916	Regions/clus2	18728	16146	0		9.49851
14917	Regions/clus2	18808	16146	0		9.1997
14918	Regions/clus2	18888	16146	0		10.9068
14919	Regions/clus2	18968	16146	0		10.1601
14920	Regions/clus2	19048	16146	0		10.0052
14922	Regions/clus2	19208	16146	0		9.15666
14923	Regions/clus2	19288	16146	0		9.97897
14924	Regions/clus2	19368	16146	0		9.13156
14925	Regions/clus2	19448	16146	0		8.80465
14975	Regions/clus2	15448	16066	0		9.2166
14977	Regions/clus2	15608	16066	0		6.57218
14981	Regions/clus2	15928	16066	0		9.28667
14982	Regions/clus2	16008	16066	0		11.1511
14983	Regions/clus2	16088	16066	0		10.5435
14984	Regions/clus2	16168	16066	0		11.0061
14994	Regions/clus2	16968	16066	0		11.0637
14995	Regions/clus2	17048	16066	0		10.5068
14996	Regions/clus2	17128	16066	0		10.6653
14997	Regions/clus2	17208	16066	0		10.8604
14998	Regions/clus2	17288	16066	0		10.9476
14999	Regions/clus2	17368	16066	0		13.2358
15000	Regions/clus2	17448	16066	0		13.9434
15002	Regions/clus2	17608	16066	0		12.9131
15003	Regions/clus2	17688	16066	0		14.309
15004	Regions/clus2	17768	16066	0		14.0116
15005	Regions/clus2	17848	16066	0		13.3914
15006	Regions/clus2	17928	16066	0		12.2945
15017	Regions/clus2	18808	16066	0		9.00077
15018	Regions/clus2	18888	16066	0		9.71805
15020	Regions/clus2	19048	16066	0		10.2005
15025	Regions/clus2	19448	16066	0		9.97273
15026	Regions/clus2	19528	16066	0		10.5087
15027	Regions/clus2	19608	16066	0		8.72146
15076	Regions/clus2	15368	15986	0		8.16637
15082	Regions/clus2	15848	15986	0		8.18581
15083	Regions/clus2	15928	15986	0		10.4565
15085	Regions/clus2	16088	15986	0		10.6504
15099	Regions/clus2	17208	15986	0		11.4899
15100	Regions/clus2	17288	15986	0		12.3624
15103	Regions/clus2	17528	15986	0		11.078
15106	Regions/clus2	17768	15986	0		11.5104
15119	Regions/clus2	18808	15986	0		8.17511
15120	Regions/clus2	18888	15986	0		10.0343
15121	Regions/clus2	18968	15986	0		7.59017
15122	Regions/clus2	19048	15986	0		9.24293
15124	Regions/clus2	19208	15986	0		9.15212
15125	Regions/clus2	19288	15986	0		9.79939
15128	Regions/clus2	19528	15986	0		9.40496
15131	Regions/clus2	19768	15986	0		7.57537
15175	Regions/clus2	15128	15906	0		8.841
15176	Regions/clus2	15208	15906	0		9.24738
15177	Regions/clus2	15288	15906	0		10.9286
15178	Regions/clus2	15368	15906	0		10.9046
15179	Regions/clus2	15448	15906	0		10.8502
15182	Regions/clus2	15688	15906	0		9.67495
15183	Regions/clus2	15768	15906	0		9.2669
15184	Regions/clus2	15848	15906	0		9.99359
15187	Regions/clus2	16088	15906	0		9.30769
15202	Regions/clus2	17288	15906	0		9.85431
15203	Regions/clus2	17368	15906	0		10.9996
15204	Regions/clus2	17448	15906	0		9.29706
15205	Regions/clus2	17528	15906	0		10.6858
15223	Regions/clus2	18968	15906	0		8.34434
15227	Regions/clus2	19288	15906	0		7.26888
15229	Regions/clus2	19448	15906	0		9.49469
15232	Regions/clus2	19688	15906	0		8.97355
15234	Regions/clus2	19848	15906	0		8.94309
15235	Regions/clus2	19928	15906	0		8.04777
15236	Regions/clus2	20008	15906	0		8.378
15237	Regions/clus2	20088	15906	0		7.9322
15277	Regions/clus2	15048	15826	0		7.52727
15279	Regions/clus2	15208	15826	0		10.619
15283	Regions/clus2	15528	15826	0		10.9334
15284	Regions/clus2	15608	15826	0		9.78006
15285	Regions/clus2	15688	15826	0		8.57602
15286	Regions/clus2	15768	15826	0		9.8835
15287	Regions/clus2	15848	15826	0		9.63318
15288	Regions/clus2	15928	15826	0		8.99218
15306	Regions/clus2	17368	15826	0		8.54394
15309	Regions/clus2	17608	15826	0		10.8064
15323	Regions/clus2	18728	15826	0		9.4246
15324	Regions/clus2	18808	15826	0		7.40519
15325	Regions/clus2	18888	15826	0		8.45532
15326	Regions/clus2	18968	15826	0		9.16792
15332	Regions/clus2	19448	15826	0		8.11843
15339	Regions/clus2	20008	15826	0		9.02548
15340	Regions/clus2	20088	15826	0		6.86085
15341	Regions/clus2	20168	15826	0		7.08294
15342	Regions/clus2	20248	15826	0		8.00327
15379	Regions/clus2	14808	15746	0		7.24609
15380	Regions/clus2	14888	15746	0		7.9268
15381	Regions/clus2	14968	15746	0		9.17094
15383	Regions/clus2	15128	15746	0		10.1316
15387	Regions/clus2	15448	15746	0		10.4664
15388	Regions/clus2	15528	15746	0		8.799
15389	Regions/clus2	15608	15746	0		7.55047
15393	Regions/clus2	15928	15746	0		10.757
15394	Regions/clus2	16008	15746	0		10.2951
15396	Regions/clus2	16168	15746	0		9.92049
15412	Regions/clus2	17448	15746	0		11.5441
15414	Regions/clus2	17608	15746	0		8.33158
15425	Regions/clus2	18488	15746	0		7.56574
15430	Regions/clus2	18888	15746	0		9.37821
15431	Regions/clus2	18968	15746	0		9.98069
15432	Regions/clus2	19048	15746	0		11.0701
15442	Regions/clus2	19848	15746	0		10.5264
15445	Regions/clus2	20088	15746	0		8.2414
15446	Regions/clus2	20168	15746	0		6.90561
15447	Regions/clus2	20248	15746	0		8.25065
15483	Regions/clus2	14728	15666	0		6.23605
15484	Regions/clus2	14808	15666	0		8.56406
15488	Regions/clus2	15128	15666	0		10.2506
15489	Regions/clus2	15208	15666	0		9.8147
15490	Regions/clus2	15288	15666	0		9.80358
15492	Regions/clus2	15448	15666	0		8.33002
15493	Regions/clus2	15528	15666	0		8.69908
15495	Regions/clus2	15688	15666	0		10.4513
15497	Regions/clus2	15848	15666	0		12.4932
15499	Regions/clus2	16008	15666	0		10.1567
15500	Regions/clus2	16088	15666	0		8.71992
15517	Regions/clus2	17448	15666	0		9.5723
15518	Regions/clus2	17528	15666	0		9.49377
15527	Regions/clus2	18248	15666	0		7.99874
15528	Regions/clus2	18328	15666	0		9.54407
15534	Regions/clus2	18808	15666	0		10.9742
15535	Regions/clus2	18888	15666	0		10.4673
15542	Regions/clus2	19448	15666	0		8.31123
15543	Regions/clus2	19528	15666	0		10.127
15544	Regions/clus2	19608	15666	0		9.95979
15545	Regions/clus2	19688	15666	0		8.16133
15546	Regions/clus2	19768	15666	0		7.30219
15549	Regions/clus2	20008	15666	0		7.85723
15551	Regions/clus2	20168	15666	0		8.15363
15552	Regions/clus2	20248	15666	0		8.72576
15588	Regions/clus2	14648	15586	0		7.40428
15593	Regions/clus2	15048	15586	0		8.81988
15600	Regions/clus2	15608	15586	0		9.0389
15603	Regions/clus2	15848	15586	0		8.74326
[truncated: 4,323 more rows]

## Sheet: Figure S7C
spotId	raster	x	y	z	Date	N-Acetylaspartate/Aspartate
0	Regions/clus3	3688	16226	0		13.2918
1	Regions/clus3	3768	16226	0		11.4418
2	Regions/clus3	3848	16226	0		10.2556
3	Regions/clus3	3928	16226	0		11.3813
4	Regions/clus3	4008	16226	0		14.4614
5	Regions/clus3	4088	16226	0		14.0806
6	Regions/clus3	4168	16226	0		19.6583
7	Regions/clus3	4248	16226	0		15.0148
8	Regions/clus3	4328	16226	0		17.8544
28	Regions/clus3	3208	16146	0		11.0696
29	Regions/clus3	3288	16146	0		11.5581
30	Regions/clus3	3368	16146	0		9.7577
31	Regions/clus3	3448	16146	0		8.58205
32	Regions/clus3	3528	16146	0		9.996
33	Regions/clus3	3608	16146	0		10.3022
34	Regions/clus3	3688	16146	0		10.1469
35	Regions/clus3	3768	16146	0		9.76055
36	Regions/clus3	3848	16146	0		9.24167
37	Regions/clus3	3928	16146	0		7.20877
38	Regions/clus3	4008	16146	0		9.69421
39	Regions/clus3	4088	16146	0		11.8885
40	Regions/clus3	4168	16146	0		14.962
41	Regions/clus3	4248	16146	0		12.4193
42	Regions/clus3	4328	16146	0		9.88664
44	Regions/clus3	4488	16146	0		16.4939
45	Regions/clus3	4568	16146	0		17.1801
46	Regions/clus3	4648	16146	0		16.1201
52	Regions/clus3	5128	16146	0		12.6978
56	Regions/clus3	5448	16146	0		9.21712
57	Regions/clus3	5528	16146	0		10.9174
59	Regions/clus3	5688	16146	0		9.12854
60	Regions/clus3	5768	16146	0		9.08951
61	Regions/clus3	5848	16146	0		12.5281
62	Regions/clus3	5928	16146	0		9.14583
63	Regions/clus3	6008	16146	0		9.10671
64	Regions/clus3	6088	16146	0		6.94518
69	Regions/clus3	2728	16066	0		13.4012
70	Regions/clus3	2808	16066	0		10.6258
71	Regions/clus3	2888	16066	0		10.5617
72	Regions/clus3	2968	16066	0		10.148
73	Regions/clus3	3048	16066	0		9.73008
74	Regions/clus3	3128	16066	0		7.97353
75	Regions/clus3	3208	16066	0		8.18006
76	Regions/clus3	3288	16066	0		8.66688
77	Regions/clus3	3368	16066	0		7.45377
78	Regions/clus3	3448	16066	0		9.62288
79	Regions/clus3	3528	16066	0		8.72234
80	Regions/clus3	3608	16066	0		9.20736
81	Regions/clus3	3688	16066	0		8.46036
82	Regions/clus3	3768	16066	0		9.21713
83	Regions/clus3	3848	16066	0		9.11104
84	Regions/clus3	3928	16066	0		8.23647
85	Regions/clus3	4008	16066	0		8.16543
92	Regions/clus3	4568	16066	0		11.7729
93	Regions/clus3	4648	16066	0		12.1979
94	Regions/clus3	4728	16066	0		13.9691
98	Regions/clus3	5048	16066	0		10.1932
99	Regions/clus3	5128	16066	0		11.3255
100	Regions/clus3	5208	16066	0		9.48998
101	Regions/clus3	5288	16066	0		9.0364
103	Regions/clus3	5448	16066	0		9.27312
104	Regions/clus3	5528	16066	0		9.39438
105	Regions/clus3	5608	16066	0		9.29663
106	Regions/clus3	5688	16066	0		7.57925
107	Regions/clus3	5768	16066	0		7.9384
108	Regions/clus3	5848	16066	0		11.5069
109	Regions/clus3	5928	16066	0		6.17642
110	Regions/clus3	6008	16066	0		9.54866
111	Regions/clus3	6088	16066	0		13.7777
112	Regions/clus3	6168	16066	0		11.8321
113	Regions/clus3	6248	16066	0		16.1536
114	Regions/clus3	6328	16066	0		13.9446
115	Regions/clus3	6408	16066	0		14.9244
116	Regions/clus3	6488	16066	0		14.0046
117	Regions/clus3	6568	16066	0		17.87
120	Regions/clus3	6808	16066	0		14.9071
123	Regions/clus3	2248	15986	0		23.2882
124	Regions/clus3	2328	15986	0		13.7826
125	Regions/clus3	2408	15986	0		12.3067
126	Regions/clus3	2488	15986	0		10.4184
127	Regions/clus3	2568	15986	0		9.90035
128	Regions/clus3	2648	15986	0		11.4372
129	Regions/clus3	2728	15986	0		10.9647
130	Regions/clus3	2808	15986	0		8.94898
131	Regions/clus3	2888	15986	0		7.59727
132	Regions/clus3	2968	15986	0		9.30533
133	Regions/clus3	3048	15986	0		10.649
134	Regions/clus3	3128	15986	0		9.86461
135	Regions/clus3	3208	15986	0		10.6301
136	Regions/clus3	3288	15986	0		8.31857
137	Regions/clus3	3368	15986	0		6.65351
138	Regions/clus3	3448	15986	0		7.89393
139	Regions/clus3	3528	15986	0		9.21716
140	Regions/clus3	3608	15986	0		9.70919
141	Regions/clus3	3688	15986	0		7.85534
142	Regions/clus3	3768	15986	0		7.40433
145	Regions/clus3	4008	15986	0		7.6514
158	Regions/clus3	5048	15986	0		9.34993
165	Regions/clus3	5608	15986	0		8.82588
166	Regions/clus3	5688	15986	0		7.6876
167	Regions/clus3	5768	15986	0		10.4812
168	Regions/clus3	5848	15986	0		8.49804
169	Regions/clus3	5928	15986	0		9.08696
170	Regions/clus3	6008	15986	0		9.94066
172	Regions/clus3	6168	15986	0		12.0614
173	Regions/clus3	6248	15986	0		14.8725
174	Regions/clus3	6328	15986	0		9.36131
175	Regions/clus3	6408	15986	0		12.8427
176	Regions/clus3	6488	15986	0		19.54
177	Regions/clus3	6568	15986	0		18.6458
178	Regions/clus3	6648	15986	0		17.4919
179	Regions/clus3	6728	15986	0		19.8197
180	Regions/clus3	6808	15986	0		18.4052
181	Regions/clus3	6888	15986	0		19.1941
182	Regions/clus3	6968	15986	0		20.0252
183	Regions/clus3	7048	15986	0		15.634
187	Regions/clus3	1928	15906	0		10.5283
188	Regions/clus3	2008	15906	0		10.8325
189	Regions/clus3	2088	15906	0		10.0979
190	Regions/clus3	2168	15906	0		11.6788
191	Regions/clus3	2248	15906	0		10.4511
192	Regions/clus3	2328	15906	0		10.1259
193	Regions/clus3	2408	15906	0		12.7917
194	Regions/clus3	2488	15906	0		10.6034
195	Regions/clus3	2568	15906	0		9.54051
196	Regions/clus3	2648	15906	0		10.8821
198	Regions/clus3	2808	15906	0		9.89898
200	Regions/clus3	2968	15906	0		9.83171
201	Regions/clus3	3048	15906	0		8.35793
206	Regions/clus3	3448	15906	0		7.49402
208	Regions/clus3	3608	15906	0		7.72645
210	Regions/clus3	3768	15906	0		8.90631
225	Regions/clus3	4968	15906	0		8.45826
235	Regions/clus3	5768	15906	0		7.26487
236	Regions/clus3	5848	15906	0		7.61515
238	Regions/clus3	6008	15906	0		9.38635
239	Regions/clus3	6088	15906	0		10.8899
240	Regions/clus3	6168	15906	0		10.1286
241	Regions/clus3	6248	15906	0		12.5911
242	Regions/clus3	6328	15906	0		10.1023
243	Regions/clus3	6408	15906	0		13.1081
244	Regions/clus3	6488	15906	0		9.19167
245	Regions/clus3	6568	15906	0		16.6979
246	Regions/clus3	6648	15906	0		11.1175
247	Regions/clus3	6728	15906	0		14.9787
248	Regions/clus3	6808	15906	0		17.0236
249	Regions/clus3	6888	15906	0		16.5174
250	Regions/clus3	6968	15906	0		16.252
251	Regions/clus3	7048	15906	0		17.2737
252	Regions/clus3	7128	15906	0		22.0206
253	Regions/clus3	7208	15906	0		16.1328
254	Regions/clus3	7288	15906	0		12.6973
256	Regions/clus3	1688	15826	0		21.1522
257	Regions/clus3	1768	15826	0		13.0714
258	Regions/clus3	1848	15826	0		17.3048
259	Regions/clus3	1928	15826	0		22.0265
260	Regions/clus3	2008	15826	0		11.0117
261	Regions/clus3	2088	15826	0		10.2534
262	Regions/clus3	2168	15826	0		10.0273
263	Regions/clus3	2248	15826	0		8.15983
264	Regions/clus3	2328	15826	0		11.1233
265	Regions/clus3	2408	15826	0		8.77051
266	Regions/clus3	2488	15826	0		10.6734
268	Regions/clus3	2648	15826	0		9.24831
269	Regions/clus3	2728	15826	0		10.8471
275	Regions/clus3	3208	15826	0		8.30317
282	Regions/clus3	3768	15826	0		7.60446
297	Regions/clus3	4968	15826	0		8.94987
316	Regions/clus3	6488	15826	0		13.1859
317	Regions/clus3	6568	15826	0		12.5238
318	Regions/clus3	6648	15826	0		15.9252
319	Regions/clus3	6728	15826	0		16.2092
320	Regions/clus3	6808	15826	0		15.4896
321	Regions/clus3	6888	15826	0		14.4491
322	Regions/clus3	6968	15826	0		16.8954
323	Regions/clus3	7048	15826	0		17.7634
324	Regions/clus3	7128	15826	0		25.0673
325	Regions/clus3	7208	15826	0		16.9623
326	Regions/clus3	7288	15826	0		19.328
327	Regions/clus3	7368	15826	0		23.1394
328	Regions/clus3	7448	15826	0		19.7963
329	Regions/clus3	1608	15746	0		14.7793
330	Regions/clus3	1688	15746	0		16.0266
331	Regions/clus3	1768	15746	0		11.5068
332	Regions/clus3	1848	15746	0		10.4485
333	Regions/clus3	1928	15746	0		11.5806
334	Regions/clus3	2008	15746	0		10.2886
335	Regions/clus3	2088	15746	0		9.16468
336	Regions/clus3	2168	15746	0		8.29917
337	Regions/clus3	2248	15746	0		9.21543
338	Regions/clus3	2328	15746	0		9.24584
393	Regions/clus3	6728	15746	0		15.4636
394	Regions/clus3	6808	15746	0		12.8806
395	Regions/clus3	6888	15746	0		12.0859
396	Regions/clus3	6968	15746	0		11.902
397	Regions/clus3	7048	15746	0		13.4596
398	Regions/clus3	7128	15746	0		13.0547
399	Regions/clus3	7208	15746	0		14.2169
400	Regions/clus3	7288	15746	0		17.0893
401	Regions/clus3	7368	15746	0		12.8174
402	Regions/clus3	7448	15746	0		13.9505
403	Regions/clus3	7528	15746	0		19.595
404	Regions/clus3	7608	15746	0		14.2184
405	Regions/clus3	1528	15666	0		16.3922
406	Regions/clus3	1608	15666	0		12.5423
407	Regions/clus3	1688	15666	0		9.50162
408	Regions/clus3	1768	15666	0		11.1344
409	Regions/clus3	1848	15666	0		11.9238
410	Regions/clus3	1928	15666	0		9.36556
411	Regions/clus3	2008	15666	0		9.41535
412	Regions/clus3	2088	15666	0		7.46045
413	Regions/clus3	2168	15666	0		9.74348
465	Regions/clus3	6328	15666	0		17.529
472	Regions/clus3	6888	15666	0		12.3893
473	Regions/clus3	6968	15666	0		11.544
474	Regions/clus3	7048	15666	0		12.8299
475	Regions/clus3	7128	15666	0		12.6493
476	Regions/clus3	7208	15666	0		14.9905
477	Regions/clus3	7288	15666	0		13.0526
478	Regions/clus3	7368	15666	0		9.49485
479	Regions/clus3	7448	15666	0		12.7175
480	Regions/clus3	7528	15666	0		11.2738
481	Regions/clus3	7608	15666	0		9.60458
482	Regions/clus3	7688	15666	0		11.1792
483	Regions/clus3	7768	15666	0		10.1921
484	Regions/clus3	1528	15586	0		10.3552
485	Regions/clus3	1608	15586	0		11.7676
486	Regions/clus3	1688	15586	0		10.8043
487	Regions/clus3	1768	15586	0		10.3268
488	Regions/clus3	1848	15586	0		8.54468
489	Regions/clus3	1928	15586	0		7.29593
490	Regions/clus3	2008	15586	0		8.16669
491	Regions/clus3	2088	15586	0		9.10739
492	Regions/clus3	2168	15586	0		8.69032
554	Regions/clus3	7128	15586	0		11.8347
555	Regions/clus3	7208	15586	0		13.8341
556	Regions/clus3	7288	15586	0		11.6213
557	Regions/clus3	7368	15586	0		10.936
558	Regions/clus3	7448	15586	0		10.9581
559	Regions/clus3	7528	15586	0		9.18255
560	Regions/clus3	7608	15586	0		9.93041
561	Regions/clus3	7688	15586	0		10.932
562	Regions/clus3	7768	15586	0		10.5407
563	Regions/clus3	7848	15586	0		14.1942
564	Regions/clus3	1448	15506	0		8.79199
565	Regions/clus3	1528	15506	0		11.4913
566	Regions/clus3	1608	15506	0		8.56397
567	Regions/clus3	1688	15506	0		11.5423
568	Regions/clus3	1768	15506	0		10.1829
569	Regions/clus3	1848	15506	0		7.22755
635	Regions/clus3	7128	15506	0		11.5012
637	Regions/clus3	7288	15506	0		9.09185
638	Regions/clus3	7368	15506	0		10.1651
639	Regions/clus3	7448	15506	0		8.6686
640	Regions/clus3	7528	15506	0		7.7855
641	Regions/clus3	7608	15506	0		8.93696
642	Regions/clus3	7688	15506	0		9.06804
643	Regions/clus3	7768	15506	0		12.1789
644	Regions/clus3	7848	15506	0		12.6991
645	Regions/clus3	7928	15506	0		13.4564
646	Regions/clus3	8008	15506	0		13.2586
647	Regions/clus3	1368	15426	0		10.8141
648	Regions/clus3	1448	15426	0		9.92253
649	Regions/clus3	1528	15426	0		10.0224
650	Regions/clus3	1608	15426	0		9.4211
651	Regions/clus3	1688	15426	0		7.87649
724	Regions/clus3	7528	15426	0		8.70646
725	Regions/clus3	7608	15426	0		9.06484
726	Regions/clus3	7688	15426	0		8.95994
727	Regions/clus3	7768	15426	0		11.8443
728	Regions/clus3	7848	15426	0		10.8423
729	Regions/clus3	7928	15426	0		10.531
730	Regions/clus3	8008	15426	0		14.4911
731	Regions/clus3	8088	15426	0		10.8599
732	Regions/clus3	8168	15426	0		13.392
733	Regions/clus3	1288	15346	0		8.55789
734	Regions/clus3	1368	15346	0		11.2207
735	Regions/clus3	1448	15346	0		10.6279
736	Regions/clus3	1528	15346	0		10.0909
737	Regions/clus3	1608	15346	0		10.3577
813	Regions/clus3	7688	15346	0		9.65
814	Regions/clus3	7768	15346	0		9.65974
815	Regions/clus3	7848	15346	0		8.93649
816	Regions/clus3	7928	15346	0		9.19693
817	Regions/clus3	8008	15346	0		10.1476
818	Regions/clus3	8088	15346	0		8.97942
819	Regions/clus3	8168	15346	0		11.2905
820	Regions/clus3	8248	15346	0		12.2934
821	Regions/clus3	1208	15266	0		9.52378
822	Regions/clus3	1288	15266	0		8.77671
823	Regions/clus3	1368	15266	0		9.20092
824	Regions/clus3	1448	15266	0		9.20336
825	Regions/clus3	1528	15266	0		8.86536
904	Regions/clus3	7848	15266	0		8.57043
905	Regions/clus3	7928	15266	0		9.00439
906	Regions/clus3	8008	15266	0		9.01299
907	Regions/clus3	8088	15266	0		7.88655
908	Regions/clus3	8168	15266	0		9.45236
909	Regions/clus3	8248	15266	0		8.42622
910	Regions/clus3	8328	15266	0		11.1043
911	Regions/clus3	8408	15266	0		11.2299
912	Regions/clus3	1208	15186	0		10.2925
913	Regions/clus3	1288	15186	0		9.36178
914	Regions/clus3	1368	15186	0		10.0688
917	Regions/clus3	1608	15186	0		9.21581
998	Regions/clus3	8088	15186	0		7.57681
999	Regions/clus3	8168	15186	0		8.42661
1000	Regions/clus3	8248	15186	0		9.51662
1001	Regions/clus3	8328	15186	0		11.2135
1002	Regions/clus3	8408	15186	0		10.0751
1003	Regions/clus3	8488	15186	0		10.7142
1004	Regions/clus3	1128	15106	0		9.35179
1005	Regions/clus3	1208	15106	0		10.6339
1006	Regions/clus3	1288	15106	0		9.20082
1090	Regions/clus3	8008	15106	0		7.03076
1091	Regions/clus3	8088	15106	0		8.34029
1092	Regions/clus3	8168	15106	0		8.0948
1093	Regions/clus3	8248	15106	0		7.39309
1094	Regions/clus3	8328	15106	0		9.62995
1095	Regions/clus3	8408	15106	0		9.74114
1096	Regions/clus3	8488	15106	0		11.3036
1097	Regions/clus3	8568	15106	0		11.5525
1098	Regions/clus3	8648	15106	0		11.0268
1099	Regions/clus3	1048	15026	0		7.63229
1100	Regions/clus3	1128	15026	0		8.79402
1101	Regions/clus3	1208	15026	0		8.65786
1102	Regions/clus3	1288	15026	0		8.06494
1103	Regions/clus3	1368	15026	0		8.07556
1188	Regions/clus3	8168	15026	0		7.53231
1190	Regions/clus3	8328	15026	0		7.68971
1191	Regions/clus3	8408	15026	0		9.59243
1192	Regions/clus3	8488	15026	0		10.8699
1193	Regions/clus3	8568	15026	0		10.0785
1194	Regions/clus3	8648	15026	0		12.6973
1195	Regions/clus3	8728	15026	0		7.15959
1196	Regions/clus3	8808	15026	0		4.72371
1198	Regions/clus3	1048	14946	0		8.44649
1199	Regions/clus3	1128	14946	0		8.37248
1200	Regions/clus3	1208	14946	0		8.75709
1288	Regions/clus3	8248	14946	0		7.94557
1289	Regions/clus3	8328	14946	0		10.3358
1290	Regions/clus3	8408	14946	0		9.08773
1291	Regions/clus3	8488	14946	0		9.11398
1292	Regions/clus3	8568	14946	0		9.62656
1293	Regions/clus3	8648	14946	0		9.94416
1294	Regions/clus3	8728	14946	0		9.83855
1295	Regions/clus3	8808	14946	0		10.4282
1297	Regions/clus3	968	14866	0		6.14813
1298	Regions/clus3	1048	14866	0		6.61135
1389	Regions/clus3	8328	14866	0		10.4949
1390	Regions/clus3	8408	14866	0		11.6624
1391	Regions/clus3	8488	14866	0		8.79143
1392	Regions/clus3	8568	14866	0		7.23504
1393	Regions/clus3	8648	14866	0		9.45267
1394	Regions/clus3	8728	14866	0		9.21013
1395	Regions/clus3	8808	14866	0		12.8843
1396	Regions/clus3	8888	14866	0		8.34315
1400	Regions/clus3	968	14786	0		7.08115
1401	Regions/clus3	1048	14786	0		7.01461
1402	Regions/clus3	1128	14786	0		7.60195
1492	Regions/clus3	8328	14786	0		10.4237
1494	Regions/clus3	8488	14786	0		10.6848
1495	Regions/clus3	8568	14786	0		9.10226
1496	Regions/clus3	8648	14786	0		8.18092
1497	Regions/clus3	8728	14786	0		8.74993
1498	Regions/clus3	8808	14786	0		9.53825
1499	Regions/clus3	8888	14786	0		14.797
1500	Regions/clus3	8968	14786	0		9.90781
1501	Regions/clus3	9048	14786	0		7.07905
1502	Regions/clus3	9128	14786	0		5.9766
1506	Regions/clus3	1048	14706	0		8.37138
1597	Regions/clus3	8328	14706	0		8.36605
1599	Regions/clus3	8488	14706	0		7.62007
1601	Regions/clus3	8648	14706	0		7.72152
1602	Regions/clus3	8728	14706	0		9.10909
1603	Regions/clus3	8808	14706	0		10.0142
1604	Regions/clus3	8888	14706	0		12.6061
1605	Regions/clus3	8968	14706	0		12.9807
1606	Regions/clus3	9048	14706	0		6.66358
1707	Regions/clus3	8648	14626	0		9.12199
1708	Regions/clus3	8728	14626	0		7.72368
1709	Regions/clus3	8808	14626	0		8.16966
1710	Regions/clus3	8888	14626	0		7.769
1711	Regions/clus3	8968	14626	0		10.0899
1712	Regions/clus3	9048	14626	0		12.4477
1713	Regions/clus3	9128	14626	0		6.71718
1716	Regions/clus3	888	14546	0		7.43893
1717	Regions/clus3	968	14546	0		15.822
1815	Regions/clus3	8808	14546	0		6.78829
1816	Regions/clus3	8888	14546	0		8.20711
1817	Regions/clus3	8968	14546	0		10.2957
1818	Regions/clus3	9048	14546	0		11.6406
1819	Regions/clus3	9128	14546	0		7.84873
1820	Regions/clus3	9208	14546	0		9.05743
1825	Regions/clus3	968	14466	0		11.2108
1920	Regions/clus3	8568	14466	0		7.54459
1921	Regions/clus3	8648	14466	0		7.29039
1922	Regions/clus3	8728	14466	0		8.17014
1924	Regions/clus3	8888	14466	0		7.5173
1925	Regions/clus3	8968	14466	0		8.37174
1926	Regions/clus3	9048	14466	0		7.79839
1927	Regions/clus3	9128	14466	0		15.7722
1928	Regions/clus3	9208	14466	0		9.01669
1933	Regions/clus3	888	14386	0		6.96004
1934	Regions/clus3	968	14386	0		10.5949
2031	Regions/clus3	8728	14386	0		7.15679
2032	Regions/clus3	8808	14386	0		7.43519
2033	Regions/clus3	8888	14386	0		7.3241
2034	Regions/clus3	8968	14386	0		7.92324
2035	Regions/clus3	9048	14386	0		9.7583
2036	Regions/clus3	9128	14386	0		7.97548
2037	Regions/clus3	9208	14386	0		14.618
2043	Regions/clus3	888	14306	0		7.76525
2143	Regions/clus3	8888	14306	0		7.56525
2144	Regions/clus3	8968	14306	0		8.13086
2145	Regions/clus3	9048	14306	0		7.5708
2146	Regions/clus3	9128	14306	0		9.17451
2147	Regions/clus3	9208	14306	0		13.1995
2148	Regions/clus3	9288	14306	0		5.72324
2154	Regions/clus3	888	14226	0		6.16584
2254	Regions/clus3	8888	14226	0		8.6363
2255	Regions/clus3	8968	14226	0		6.96781
2256	Regions/clus3	9048	14226	0		9.03311
2257	Regions/clus3	9128	14226	0		8.34975
2258	Regions/clus3	9208	14226	0		11.7543
2259	Regions/clus3	9288	14226	0		16.2709
2366	Regions/clus3	8968	14146	0		7.32649
2367	Regions/clus3	9048	14146	0		7.5568
2368	Regions/clus3	9128	14146	0		10.4506
2369	Regions/clus3	9208	14146	0		12.2829
2370	Regions/clus3	9288	14146	0		13.1278
2371	Regions/clus3	9368	14146	0		7.71556
2377	Regions/clus3	808	14066	0		6.23488
2479	Regions/clus3	8968	14066	0		7.54064
2480	Regions/clus3	9048	14066	0		8.53459
2481	Regions/clus3	9128	14066	0		10.3419
2482	Regions/clus3	9208	14066	0		10.9485
2483	Regions/clus3	9288	14066	0		12.6267
2484	Regions/clus3	9368	14066	0		13.7867
2487	Regions/clus3	568	13986	0		6.69166
2491	Regions/clus3	888	13986	0		5.5826
2593	Regions/clus3	9048	13986	0		8.84111
2594	Regions/clus3	9128	13986	0		8.04397
2595	Regions/clus3	9208	13986	0		10.1769
2596	Regions/clus3	9288	13986	0		12.7434
2597	Regions/clus3	9368	13986	0		17.5068
2707	Regions/clus3	9048	13906	0		8.999
2708	Regions/clus3	9128	13906	0		8.47235
2709	Regions/clus3	9208	13906	0		9.51828
2710	Regions/clus3	9288	13906	0		10.2522
2711	Regions/clus3	9368	13906	0		25.126
2823	Regions/clus3	9128	13826	0		7.65981
2824	Regions/clus3	9208	13826	0		7.69657
2825	Regions/clus3	9288	13826	0		12.0616
2827	Regions/clus3	9448	13826	0		7.79599
2938	Regions/clus3	9128	13746	0		8.00855
2939	Regions/clus3	9208	13746	0		7.9068
2940	Regions/clus3	9288	13746	0		10.2792
2941	Regions/clus3	9368	13746	0		9.34828
3055	Regions/clus3	9128	13666	0		8.36827
3056	Regions/clus3	9208	13666	0		7.49978
3057	Regions/clus3	9288	13666	0		11.1498
3058	Regions/clus3	9368	13666	0		19.8361
3060	Regions/clus3	9528	13666	0		7.72608
3173	Regions/clus3	9208	13586	0		7.09403
3174	Regions/clus3	9288	13586	0		8.40772
3175	Regions/clus3	9368	13586	0		10.8753
3176	Regions/clus3	9448	13586	0		23.4676
3177	Regions/clus3	9528	13586	0		18.6975
3185	Regions/clus3	808	13506	0		4.77212
3290	Regions/clus3	9208	13506	0		6.78377
3291	Regions/clus3	9288	13506	0		7.88001
3292	Regions/clus3	9368	13506	0		7.99345
3293	Regions/clus3	9448	13506	0		17.465
3294	Regions/clus3	9528	13506	0		15.295
3295	Regions/clus3	9608	13506	0		14.5204
3303	Regions/clus3	808	13426	0		5.11902
3408	Regions/clus3	9208	13426	0		7.86143
3409	Regions/clus3	9288	13426	0		7.70506
3410	Regions/clus3	9368	13426	0		10.8225
3411	Regions/clus3	9448	13426	0		19.1687
3412	Regions/clus3	9528	13426	0		6.93416
3413	Regions/clus3	9608	13426	0		8.2931
3527	Regions/clus3	9288	13346	0		7.66433
3528	Regions/clus3	9368	13346	0		10.2053
3529	Regions/clus3	9448	13346	0		17.8077
3646	Regions/clus3	9288	13266	0		6.70081
3647	Regions/clus3	9368	13266	0		10.1628
3648	Regions/clus3	9448	13266	0		17.8306
3660	Regions/clus3	808	13186	0		4.54603
3766	Regions/clus3	9288	13186	0		7.92518
3767	Regions/clus3	9368	13186	0		7.82911
3768	Regions/clus3	9448	13186	0		15.2376
3886	Regions/clus3	9288	13106	0		7.34564
3887	Regions/clus3	9368	13106	0		8.73064
3888	Regions/clus3	9448	13106	0		14.9366
3891	Regions/clus3	9688	13106	0		7.00723
4006	Regions/clus3	9288	13026	0		7.66391
4007	Regions/clus3	9368	13026	0		11.4282
4018	Regions/clus3	728	12946	0		5.53981
4019	Regions/clus3	808	12946	0		4.18026
4125	Regions/clus3	9288	12946	0		9.1104
4126	Regions/clus3	9368	12946	0		15.6892
4241	Regions/clus3	9048	12866	0		7.03546
4243	Regions/clus3	9208	12866	0		7.59674
4244	Regions/clus3	9288	12866	0		9.91635
4245	Regions/clus3	9368	12866	0		14.1517
4248	Regions/clus3	9608	12866	0		5.19953
4256	Regions/clus3	728	12786	0		4.45311
4257	Regions/clus3	808	12786	0		4.21485
4362	Regions/clus3	9208	12786	0		8.80132
4363	Regions/clus3	9288	12786	0		8.70535
4376	Regions/clus3	808	12706	0		5.68472
4481	Regions/clus3	9208	12706	0		8.80539
4482	Regions/clus3	9288	12706	0		9.42789
4486	Regions/clus3	9608	12706	0		7.02035
4496	Regions/clus3	808	12626	0		4.94409
4599	Regions/clus3	9048	12626	0		7.79144
4600	Regions/clus3	9128	12626	0		7.63899
4601	Regions/clus3	9208	12626	0		6.95963
4602	Regions/clus3	9288	12626	0		8.68356
4603	Regions/clus3	9368	12626	0		14.709
4615	Regions/clus3	808	12546	0		4.69453
4716	Regions/clus3	8888	12546	0		6.49492
4718	Regions/clus3	9048	12546	0		8.75171
4719	Regions/clus3	9128	12546	0		8.37284
4720	Regions/clus3	9208	12546	0		7.56918
4721	Regions/clus3	9288	12546	0		9.37417
4722	Regions/clus3	9368	12546	0		12.9272
4836	Regions/clus3	8968	12466	0		8.00702
4837	Regions/clus3	9048	12466	0		8.48504
4838	Regions/clus3	9128	12466	0		7.83818
4839	Regions/clus3	9208	12466	0		8.69508
4840	Regions/clus3	9288	12466	0		11.5981
4841	Regions/clus3	9368	12466	0		12.7905
4853	Regions/clus3	808	12386	0		5.48607
4854	Regions/clus3	888	12386	0		6.74299
4955	Regions/clus3	8968	12386	0		7.46278
4956	Regions/clus3	9048	12386	0		7.4563
4957	Regions/clus3	9128	12386	0		8.54713
4958	Regions/clus3	9208	12386	0		8.83336
4959	Regions/clus3	9288	12386	0		9.14466
4960	Regions/clus3	9368	12386	0		9.60843
4971	Regions/clus3	808	12306	0		6.30912
4972	Regions/clus3	888	12306	0		6.63374
5074	Regions/clus3	9048	12306	0		7.83665
5075	Regions/clus3	9128	12306	0		8.08337
5076	Regions/clus3	9208	12306	0		8.71701
5077	Regions/clus3	9288	12306	0		10.3109
5078	Regions/clus3	9368	12306	0		11.8867
5079	Regions/clus3	9448	12306	0		5.69017
5088	Regions/clus3	728	12226	0		5.86717
5090	Regions/clus3	888	12226	0		6.49521
5192	Regions/clus3	9048	12226	0		8.49914
5193	Regions/clus3	9128	12226	0		9.40337
5194	Regions/clus3	9208	12226	0		9.41682
5195	Regions/clus3	9288	12226	0		9.27655
5206	Regions/clus3	888	12146	0		6.31509
5308	Regions/clus3	9048	12146	0		7.81761
5309	Regions/clus3	9128	12146	0		8.68057
5310	Regions/clus3	9208	12146	0		12.7003
5311	Regions/clus3	9288	12146	0		10.5337
5313	Regions/clus3	9448	12146	0		5.84423
5321	Regions/clus3	808	12066	0		5.57274
5424	Regions/clus3	9048	12066	0		10.9387
5425	Regions/clus3	9128	12066	0		9.95457
5426	Regions/clus3	9208	12066	0		16.3803
5429	Regions/clus3	9448	12066	0		7.62609
5436	Regions/clus3	808	11986	0		6.76148
5539	Regions/clus3	9048	11986	0		12.8441
5540	Regions/clus3	9128	11986	0		12.009
5551	Regions/clus3	808	11906	0		6.00619
5552	Regions/clus3	888	11906	0		6.60902
5553	Regions/clus3	968	11906	0		5.96965
5654	Regions/clus3	9048	11906	0		12.0002
5665	Regions/clus3	808	11826	0		7.9575
5666	Regions/clus3	888	11826	0		6.17248
5672	Regions/clus3	1368	11826	0		5.50887
5765	Regions/clus3	8808	11826	0		8.97765
5766	Regions/clus3	8888	11826	0		8.89628
5767	Regions/clus3	8968	11826	0		11.6424
5778	Regions/clus3	808	11746	0		37.8955
5779	Regions/clus3	888	11746	0		15.548
5781	Regions/clus3	1048	11746	0		6.68021
5783	Regions/clus3	1208	11746	0		6.49569
5784	Regions/clus3	1288	11746	0		5.84274
5785	Regions/clus3	1368	11746	0		5.8665
5879	Regions/clus3	8888	11746	0		11.895
5880	Regions/clus3	8968	11746	0		11.8029
5889	Regions/clus3	728	11666	0		41.1346
5890	Regions/clus3	808	11666	0		18.8225
5891	Regions/clus3	888	11666	0		15.1599
5892	Regions/clus3	968	11666	0		6.30339
5894	Regions/clus3	1128	11666	0		5.29618
5895	Regions/clus3	1208	11666	0		6.22733
5896	Regions/clus3	1288	11666	0		6.60149
5897	Regions/clus3	1368	11666	0		5.46732
5898	Regions/clus3	1448	11666	0		5.08719
5899	Regions/clus3	1528	11666	0		6.071
5901	Regions/clus3	1688	11666	0		7.70367
5987	Regions/clus3	8568	11666	0		8.27448
5989	Regions/clus3	8728	11666	0		7.12326
5990	Regions/clus3	8808	11666	0		7.84626
5999	Regions/clus3	648	11586	0		6.58564
6000	Regions/clus3	728	11586	0		23.6054
6001	Regions/clus3	808	11586	0		24.6972
6002	Regions/clus3	888	11586	0		7.21151
6004	Regions/clus3	1048	11586	0		6.72635
6006	Regions/clus3	1208	11586	0		6.14957
6007	Regions/clus3	1288	11586	0		5.11083
6008	Regions/clus3	1368	11586	0		6.51657
6009	Regions/clus3	1448	11586	0		6.18034
6010	Regions/clus3	1528	11586	0		6.62068
6011	Regions/clus3	1608	11586	0		6.47802
6012	Regions/clus3	1688	11586	0		7.30622
6014	Regions/clus3	1848	11586	0		7.39605
6096	Regions/clus3	8408	11586	0		7.39595
6098	Regions/clus3	8568	11586	0		9.75852
6100	Regions/clus3	8728	11586	0		7.98806
6101	Regions/clus3	8808	11586	0		8.51867
6109	Regions/clus3	728	11506	0		6.45764
6110	Regions/clus3	808	11506	0		8.95514
6111	Regions/clus3	888	11506	0		7.40199
6112	Regions/clus3	968	11506	0		6.77338
6113	Regions/clus3	1048	11506	0		6.41641
6114	Regions/clus3	1128	11506	0		7.13484
6115	Regions/clus3	1208	11506	0		7.71079
6116	Regions/clus3	1288	11506	0		6.53807
6117	Regions/clus3	1368	11506	0		6.47457
6119	Regions/clus3	1528	11506	0		6.32251
6120	Regions/clus3	1608	11506	0		7.18718
6121	Regions/clus3	1688	11506	0		7.4457
6123	Regions/clus3	1848	11506	0		7.44838
6124	Regions/clus3	1928	11506	0		7.07342
6203	Regions/clus3	8248	11506	0		7.57834
6205	Regions/clus3	8408	11506	0		6.2995
6207	Regions/clus3	8568	11506	0		7.32668
6208	Regions/clus3	8648	11506	0		7.17742
6209	Regions/clus3	8728	11506	0		10.0264
6216	Regions/clus3	808	11426	0		7.09857
6217	Regions/clus3	888	11426	0		6.99202
6218	Regions/clus3	968	11426	0		7.3814
6219	Regions/clus3	1048	11426	0		7.41959
6220	Regions/clus3	1128	11426	0		7.42258
6221	Regions/clus3	1208	11426	0		5.93407
6222	Regions/clus3	1288	11426	0		6.16821
6223	Regions/clus3	1368	11426	0		6.41973
6224	Regions/clus3	1448	11426	0		6.73886
6225	Regions/clus3	1528	11426	0		6.46629
6226	Regions/clus3	1608	11426	0		5.72995
6227	Regions/clus3	1688	11426	0		6.28211
6228	Regions/clus3	1768	11426	0		7.10202
6229	Regions/clus3	1848	11426	0		8.6724
6230	Regions/clus3	1928	11426	0		9.05814
6232	Regions/clus3	2088	11426	0		7.84034
6311	Regions/clus3	8408	11426	0		6.53133
6312	Regions/clus3	8488	11426	0		9.54445
6313	Regions/clus3	8568	11426	0		6.96552
6314	Regions/clus3	8648	11426	0		9.16851
6319	Regions/clus3	968	11346	0		6.43805
6320	Regions/clus3	1048	11346	0		6.85892
6321	Regions/clus3	1128	11346	0		6.93064
6322	Regions/clus3	1208	11346	0		7.6009
6323	Regions/clus3	1288	11346	0		6.7719
6324	Regions/clus3	1368	11346	0		7.36049
6325	Regions/clus3	1448	11346	0		6.65417
6326	Regions/clus3	1528	11346	0		7.60408
6327	Regions/clus3	1608	11346	0		7.38814
6328	Regions/clus3	1688	11346	0		6.63553
6329	Regions/clus3	1768	11346	0		7.7835
6330	Regions/clus3	1848	11346	0		7.76205
6331	Regions/clus3	1928	11346	0		9.92188
6332	Regions/clus3	2008	11346	0		7.69197
6333	Regions/clus3	2088	11346	0		8.69037
6334	Regions/clus3	2168	11346	0		8.92374
6408	Regions/clus3	8088	11346	0		6.87297
6409	Regions/clus3	8168	11346	0		7.04797
6410	Regions/clus3	8248	11346	0		7.10052
6412	Regions/clus3	8408	11346	0		7.5225
6413	Regions/clus3	8488	11346	0		8.2961
6414	Regions/clus3	8568	11346	0		9.19596
6415	Regions/clus3	8648	11346	0		8.6594
6419	Regions/clus3	1208	11266	0		7.74611
6420	Regions/clus3	1288	11266	0		7.08204
6421	Regions/clus3	1368	11266	0		7.84975
6422	Regions/clus3	1448	11266	0		6.77058
6423	Regions/clus3	1528	11266	0		7.24151
6424	Regions/clus3	1608	11266	0		8.56936
6425	Regions/clus3	1688	11266	0		8.36659
6426	Regions/clus3	1768	11266	0		7.78444
6427	Regions/clus3	1848	11266	0		7.15729
6428	Regions/clus3	1928	11266	0		7.76975
6429	Regions/clus3	2008	11266	0		7.25141
6430	Regions/clus3	2088	11266	0		8.63276
6431	Regions/clus3	2168	11266	0		8.71234
6432	Regions/clus3	2248	11266	0		8.78081
6433	Regions/clus3	2328	11266	0		7.58636
6434	Regions/clus3	2408	11266	0		8.92417
6436	Regions/clus3	2568	11266	0		8.8128
6462	Regions/clus3	4648	11266	0		5.53677
6503	Regions/clus3	7928	11266	0		6.77382
6504	Regions/clus3	8008	11266	0		7.19488
6506	Regions/clus3	8168	11266	0		8.32701
6507	Regions/clus3	8248	11266	0		8.81116
6508	Regions/clus3	8328	11266	0		8.81391
6509	Regions/clus3	8408	11266	0		7.69369
6510	Regions/clus3	8488	11266	0		10.1128
6515	Regions/clus3	1448	11186	0		6.88199
6516	Regions/clus3	1528	11186	0		8.25716
6517	Regions/clus3	1608	11186	0		8.69049
6518	Regions/clus3	1688	11186	0		8.89154
6519	Regions/clus3	1768	11186	0		7.68121
6520	Regions/clus3	1848	11186	0		7.92816
6521	Regions/clus3	1928	11186	0		7.59996
6522	Regions/clus3	2008	11186	0		7.69953
6523	Regions/clus3	2088	11186	0		8.29043
6524	Regions/clus3	2168	11186	0		11.828
6525	Regions/clus3	2248	11186	0		9.52844
6526	Regions/clus3	2328	11186	0		8.46332
6527	Regions/clus3	2408	11186	0		9.27358
6528	Regions/clus3	2488	11186	0		9.52543
6529	Regions/clus3	2568	11186	0		9.44006
6530	Regions/clus3	2648	11186	0		10.2534
6531	Regions/clus3	2728	11186	0		8.70111
6555	Regions/clus3	4648	11186	0		4.32897
6577	Regions/clus3	6408	11186	0		9.57004
6597	Regions/clus3	8008	11186	0		7.5038
6598	Regions/clus3	8088	11186	0		6.51359
6599	Regions/clus3	8168	11186	0		7.79908
6600	Regions/clus3	8248	11186	0		8.81239
6601	Regions/clus3	8328	11186	0		9.9334
6602	Regions/clus3	8408	11186	0		10.7983
6606	Regions/clus3	1688	11106	0		7.67696
6607	Regions/clus3	1768	11106	0		7.20197
6608	Regions/clus3	1848	11106	0		8.50967
6609	Regions/clus3	1928	11106	0		8.04349
6610	Regions/clus3	2008	11106	0		9.3007
6611	Regions/clus3	2088	11106	0		10.3647
6612	Regions/clus3	2168	11106	0		8.38086
6613	Regions/clus3	2248	11106	0		7.74113
6614	Regions/clus3	2328	11106	0		9.89778
6615	Regions/clus3	2408	11106	0		11.5861
6616	Regions/clus3	2488	11106	0		9.96557
6617	Regions/clus3	2568	11106	0		10.2886
6618	Regions/clus3	2648	11106	0		9.58321
6619	Regions/clus3	2728	11106	0		12.4901
6620	Regions/clus3	2808	11106	0		10.0321
6621	Regions/clus3	2888	11106	0		8.38176
6622	Regions/clus3	2968	11106	0		10.9996
6666	Regions/clus3	6488	11106	0		7.54388
6671	Regions/clus3	6888	11106	0		7.44784
6672	Regions/clus3	6968	11106	0		6.744
6681	Regions/clus3	7688	11106	0		8.36414
6683	Regions/clus3	7848	11106	0		7.87955
6684	Regions/clus3	7928	11106	0		7.67075
6685	Regions/clus3	8008	11106	0		7.4039
6686	Regions/clus3	8088	11106	0		8.99469
6687	Regions/clus3	8168	11106	0		8.79517
6688	Regions/clus3	8248	11106	0		10.3864
6689	Regions/clus3	8328	11106	0		10.2965
6708	Regions/clus3	4168	11026	0		12.1539
6734	Regions/clus3	6488	11026	0		9.00866
6738	Regions/clus3	6808	11026	0		8.23827
6747	Regions/clus3	7528	11026	0		7.64055
6749	Regions/clus3	7688	11026	0		7.33417
6750	Regions/clus3	7768	11026	0		8.2351
6751	Regions/clus3	7848	11026	0		8.489
6752	Regions/clus3	7928	11026	0		7.1833
6753	Regions/clus3	8008	11026	0		8.18885
6754	Regions/clus3	8088	11026	0		7.13313
6755	Regions/clus3	8168	11026	0		9.86436
6756	Regions/clus3	8248	11026	0		13.7692
6790	Regions/clus3	6648	10946	0		9.44238
6791	Regions/clus3	6728	10946	0		10.2468
6792	Regions/clus3	6808	10946	0		8.08822
6793	Regions/clus3	6888	10946	0		9.13994
6794	Regions/clus3	6968	10946	0		5.96192
6795	Regions/clus3	7048	10946	0		9.23861
6799	Regions/clus3	7368	10946	0		7.90579
6800	Regions/clus3	7448	10946	0		8.61204
6801	Regions/clus3	7528	10946	0		7.76126
6802	Regions/clus3	7608	10946	0		8.8647
6803	Regions/clus3	7688	10946	0		8.79531
6804	Regions/clus3	7768	10946	0		9.30728
6805	Regions/clus3	7848	10946	0		11.1891
6806	Regions/clus3	7928	10946	0		10.9361
6807	Regions/clus3	8008	10946	0		10.4499
6826	Regions/clus3	6728	10866	0		14.6984
6827	Regions/clus3	6808	10866	0		9.25964
6828	Regions/clus3	6888	10866	0		7.77479
6829	Regions/clus3	6968	10866	0		8.81098
6830	Regions/clus3	7048	10866	0		8.4172
6831	Regions/clus3	7128	10866	0		9.33114
6832	Regions/clus3	7208	10866	0		9.69035
6834	Regions/clus3	7368	10866	0		8.07633
6835	Regions/clus3	7448	10866	0		7.62902
6836	Regions/clus3	7528	10866	0		7.56033
6837	Regions/clus3	7608	10866	0		8.43939
6838	Regions/clus3	7688	10866	0		9.21409
6839	Regions/clus3	7768	10866	0		9.59018
6841	Regions/clus3	7928	10866	0		11.0173
6843	Regions/clus3	6888	10786	0		11.0799
6844	Regions/clus3	6968	10786	0		11.1893
6845	Regions/clus3	7048	10786	0		11.1248
6846	Regions/clus3	7128	10786	0		8.82225
6847	Regions/clus3	7208	10786	0		10.2962
6848	Regions/clus3	7288	10786	0		13.2714
6849	Regions/clus3	7368	10786	0		11.9829
6850	Regions/clus3	7448	10786	0		12.3753
6852	Regions/clus3	7608	10786	0		10.8831
6853	Regions/clus3	7688	10786	0		11.3572
6857	Regions/clus3	7208	10706	0		10.0691
6858	Regions/clus3	7288	10706	0		14.3928
6864	Regions/clus3	31288	17106	0		13.3962
6867	Regions/clus3	31288	17026	0		24.5057
6872	Regions/clus3	31208	16946	0		22.5434
6873	Regions/clus3	31288	16946	0		16.6661
6874	Regions/clus3	31368	16946	0		25.0669
6876	Regions/clus3	31528	16946	0		543.956
6883	Regions/clus3	27368	16866	0		605.063
6884	Regions/clus3	27448	16866	0		13.8158
6885	Regions/clus3	27528	16866	0		13.2435
6886	Regions/clus3	27608	16866	0		14.4366
6887	Regions/clus3	27688	16866	0		17.6139
6888	Regions/clus3	27768	16866	0		16.6194
6889	Regions/clus3	27848	16866	0		13.1818
6892	Regions/clus3	28088	16866	0		16.7312
6893	Regions/clus3	28168	16866	0		10.7348
6894	Regions/clus3	28248	16866	0		9.08312
6900	Regions/clus3	31208	16866	0		15.0133
6901	Regions/clus3	31288	16866	0		15.041
6902	Regions/clus3	31368	16866	0		25.2782
6903	Regions/clus3	31448	16866	0		18.0489
6904	Regions/clus3	31528	16866	0		17.7023
6905	Regions/clus3	31608	16866	0		9.61002
6906	Regions/clus3	31688	16866	0		427.509
6912	Regions/clus3	27128	16786	0		17.4415
6913	Regions/clus3	27208	16786	0		24.1762
6914	Regions/clus3	27288	16786	0		23.8293
6915	Regions/clus3	27368	16786	0		18.4091
6916	Regions/clus3	27448	16786	0		22.0961
6917	Regions/clus3	27528	16786	0		19.1127
6918	Regions/clus3	27608	16786	0		11.6862
6919	Regions/clus3	27688	16786	0		15.9904
6920	Regions/clus3	27768	16786	0		13.1288
6921	Regions/clus3	27848	16786	0		15.9235
6922	Regions/clus3	27928	16786	0		18.459
6923	Regions/clus3	28008	16786	0		18.123
6924	Regions/clus3	28088	16786	0		13.7954
6925	Regions/clus3	28168	16786	0		16.4001
6926	Regions/clus3	28248	16786	0		11.9152
6927	Regions/clus3	28328	16786	0		11.7668
6928	Regions/clus3	28408	16786	0		14.9175
6929	Regions/clus3	28488	16786	0		11.9149
6930	Regions/clus3	28568	16786	0		9.2889
6931	Regions/clus3	28648	16786	0		8.35815
6932	Regions/clus3	28728	16786	0		21.8549
6933	Regions/clus3	31208	16786	0		18.9309
6934	Regions/clus3	31288	16786	0		12.2596
6935	Regions/clus3	31368	16786	0		16.916
6936	Regions/clus3	31448	16786	0		13.9304
6937	Regions/clus3	31528	16786	0		21.0253
6938	Regions/clus3	31608	16786	0		27.1529
6939	Regions/clus3	31688	16786	0		13.0078
6940	Regions/clus3	31768	16786	0		11.2402
6948	Regions/clus3	27048	16706	0		7.44544
6949	Regions/clus3	27128	16706	0		24.9618
6950	Regions/clus3	27208	16706	0		17.9748
6951	Regions/clus3	27288	16706	0		22.0103
6952	Regions/clus3	27368	16706	0		22.6063
6953	Regions/clus3	27448	16706	0		19.7591
6954	Regions/clus3	27528	16706	0		16.1151
6955	Regions/clus3	27608	16706	0		13.0938
6956	Regions/clus3	27688	16706	0		13.0108
6957	Regions/clus3	27768	16706	0		14.1383
6958	Regions/clus3	27848	16706	0		16.1325
6959	Regions/clus3	27928	16706	0		12.9747
6960	Regions/clus3	28008	16706	0		16.6019
6961	Regions/clus3	28088	16706	0		13.575
6962	Regions/clus3	28168	16706	0		10.6388
6963	Regions/clus3	28248	16706	0		11.2297
6964	Regions/clus3	28328	16706	0		12.2921
6965	Regions/clus3	28408	16706	0		10.6629
6966	Regions/clus3	28488	16706	0		11.4858
6967	Regions/clus3	28568	16706	0		11.5804
6968	Regions/clus3	28648	16706	0		12.8641
6969	Regions/clus3	28728	16706	0		14.6758
6970	Regions/clus3	31128	16706	0		19.188
6971	Regions/clus3	31208	16706	0		15.9538
6972	Regions/clus3	31288	16706	0		17.155
6973	Regions/clus3	31368	16706	0		17.6464
6974	Regions/clus3	31448	16706	0		15.9953
6975	Regions/clus3	31528	16706	0		17.6294
6976	Regions/clus3	31608	16706	0		19.9725
6977	Regions/clus3	31688	16706	0		19.9469
6978	Regions/clus3	31768	16706	0		8.33031
6979	Regions/clus3	31848	16706	0		7.01348
6980	Regions/clus3	31928	16706	0		9.64546
6985	Regions/clus3	26568	16626	0		12.8949
6986	Regions/clus3	26648	16626	0		9.1193
6989	Regions/clus3	26888	16626	0		4.99828
6990	Regions/clus3	26968	16626	0		328.117
6991	Regions/clus3	27048	16626	0		14.4766
6992	Regions/clus3	27128	16626	0		29.4389
6993	Regions/clus3	27208	16626	0		20.3952
6994	Regions/clus3	27288	16626	0		19.4018
6995	Regions/clus3	27368	16626	0		14.7692
6996	Regions/clus3	27448	16626	0		14.361
6997	Regions/clus3	27528	16626	0		13.0774
6998	Regions/clus3	27608	16626	0		13.1469
6999	Regions/clus3	27688	16626	0		11.902
7000	Regions/clus3	27768	16626	0		13.2874
7003	Regions/clus3	28008	16626	0		12.5338
7004	Regions/clus3	28088	16626	0		12.042
7005	Regions/clus3	28168	16626	0		11.4834
7006	Regions/clus3	28248	16626	0		11.2441
7007	Regions/clus3	28328	16626	0		11.6214
7012	Regions/clus3	28728	16626	0		15.5812
7013	Regions/clus3	28808	16626	0		16.0976
7015	Regions/clus3	31208	16626	0		17.7691
7016	Regions/clus3	31288	16626	0		20.9224
7017	Regions/clus3	31368	16626	0		20.2434
7018	Regions/clus3	31448	16626	0		13.3646
7019	Regions/clus3	31528	16626	0		12.9288
7020	Regions/clus3	31608	16626	0		16.8123
7021	Regions/clus3	31688	16626	0		15.6409
7022	Regions/clus3	31768	16626	0		15.7614
7023	Regions/clus3	31848	16626	0		17.6465
7024	Regions/clus3	31928	16626	0		11.9381
7025	Regions/clus3	32008	16626	0		9.97512
7031	Regions/clus3	26408	16546	0		18.6368
7032	Regions/clus3	26488	16546	0		13.5697
7033	Regions/clus3	26568	16546	0		14.7412
7034	Regions/clus3	26648	16546	0		10.105
7035	Regions/clus3	26728	16546	0		9.10854
7036	Regions/clus3	26808	16546	0		10.8431
7037	Regions/clus3	26888	16546	0		6.81448
7038	Regions/clus3	26968	16546	0		8.96817
7039	Regions/clus3	27048	16546	0		29.9464
7040	Regions/clus3	27128	16546	0		21.2596
7041	Regions/clus3	27208	16546	0		14.7155
7042	Regions/clus3	27288	16546	0		14.61
7043	Regions/clus3	27368	16546	0		21.0069
7045	Regions/clus3	27528	16546	0		10.6099
7052	Regions/clus3	28088	16546	0		14.4119
7053	Regions/clus3	28168	16546	0		12.3531
7062	Regions/clus3	28888	16546	0		12.2761
7065	Regions/clus3	31288	16546	0		18.9972
7066	Regions/clus3	31368	16546	0		17.0608
7067	Regions/clus3	31448	16546	0		14.612
7068	Regions/clus3	31528	16546	0		15.4308
7069	Regions/clus3	31608	16546	0		13.4829
7070	Regions/clus3	31688	16546	0		12.2325
7071	Regions/clus3	31768	16546	0		16.2965
7072	Regions/clus3	31848	16546	0		15.8424
7073	Regions/clus3	31928	16546	0		20.3828
7074	Regions/clus3	32008	16546	0		19.7935
7075	Regions/clus3	32088	16546	0		20.7194
7076	Regions/clus3	32168	16546	0		9.25795
7077	Regions/clus3	32248	16546	0		7.63721
7081	Regions/clus3	26328	16466	0		15.4503
7082	Regions/clus3	26408	16466	0		15.898
7083	Regions/clus3	26488	16466	0		11.7729
7084	Regions/clus3	26568	16466	0		11.4424
7085	Regions/clus3	26648	16466	0		11.7771
7086	Regions/clus3	26728	16466	0		13.0275
7087	Regions/clus3	26808	16466	0		7.04865
7088	Regions/clus3	26888	16466	0		10.27
7089	Regions/clus3	26968	16466	0		15.6115
7090	Regions/clus3	27048	16466	0		23.1882
7091	Regions/clus3	27128	16466	0		21.8171
7094	Regions/clus3	27368	16466	0		12.2571
7100	Regions/clus3	27848	16466	0		10.3934
7112	Regions/clus3	28808	16466	0		19.364
7113	Regions/clus3	28888	16466	0		15.5789
7114	Regions/clus3	31048	16466	0		10.5297
7117	Regions/clus3	31288	16466	0		17.2724
7119	Regions/clus3	31448	16466	0		12.0252
7120	Regions/clus3	31528	16466	0		12.9774
7121	Regions/clus3	31608	16466	0		11.171
7122	Regions/clus3	31688	16466	0		11.2734
7123	Regions/clus3	31768	16466	0		10.9277
7124	Regions/clus3	31848	16466	0		13.1358
7125	Regions/clus3	31928	16466	0		14.5465
7126	Regions/clus3	32008	16466	0		17.0761
7127	Regions/clus3	32088	16466	0		16.3682
7128	Regions/clus3	32168	16466	0		14.1216
7129	Regions/clus3	32248	16466	0		16.0512
7130	Regions/clus3	32328	16466	0		10.8331
7131	Regions/clus3	32408	16466	0		5.78784
7134	Regions/clus3	26248	16386	0		15.2383
7135	Regions/clus3	26328	16386	0		16.0267
7136	Regions/clus3	26408	16386	0		12.3655
7137	Regions/clus3	26488	16386	0		11.6527
7138	Regions/clus3	26568	16386	0		12.0897
7139	Regions/clus3	26648	16386	0		10.0953
7140	Regions/clus3	26728	16386	0		9.14261
7141	Regions/clus3	26808	16386	0		13.5071
7143	Regions/clus3	26968	16386	0		20.7624
7144	Regions/clus3	27048	16386	0		18.3876
7167	Regions/clus3	28888	16386	0		9.38746
7168	Regions/clus3	28968	16386	0		15.362
7169	Regions/clus3	31048	16386	0		10.5742
7176	Regions/clus3	31608	16386	0		11.6654
7177	Regions/clus3	31688	16386	0		11.1543
7178	Regions/clus3	31768	16386	0		10.1315
7179	Regions/clus3	31848	16386	0		12.165
7180	Regions/clus3	31928	16386	0		14.9589
7181	Regions/clus3	32008	16386	0		11.7156
7182	Regions/clus3	32088	16386	0		14.629
7183	Regions/clus3	32168	16386	0		13.4365
7184	Regions/clus3	32248	16386	0		17.0153
7185	Regions/clus3	32328	16386	0		20.4277
7186	Regions/clus3	32408	16386	0		12.404
7187	Regions/clus3	32488	16386	0		6.94721
7188	Regions/clus3	32568	16386	0		9.84853
7190	Regions/clus3	26168	16306	0		14.4418
7191	Regions/clus3	26248	16306	0		14.5009
7192	Regions/clus3	26328	16306	0		10.3981
7193	Regions/clus3	26408	16306	0		12.427
7194	Regions/clus3	26488	16306	0		9.80808
7195	Regions/clus3	26568	16306	0		9.86572
7196	Regions/clus3	26648	16306	0		10.5143
7198	Regions/clus3	26808	16306	0		10.799
7225	Regions/clus3	28968	16306	0		12.752
7226	Regions/clus3	30968	16306	0		12.2445
7236	Regions/clus3	31768	16306	0		11.6518
7237	Regions/clus3	31848	16306	0		10.767
7238	Regions/clus3	31928	16306	0		12.3706
7239	Regions/clus3	32008	16306	0		12.3039
7240	Regions/clus3	32088	16306	0		16.6254
7241	Regions/clus3	32168	16306	0		14.2564
7242	Regions/clus3	32248	16306	0		13.3725
7243	Regions/clus3	32328	16306	0		15.0019
7244	Regions/clus3	32408	16306	0		16.6004
7245	Regions/clus3	32488	16306	0		9.97802
7246	Regions/clus3	32568	16306	0		7.13322
7247	Regions/clus3	32648	16306	0		7.95018
7248	Regions/clus3	32728	16306	0		49.0595
7249	Regions/clus3	26008	16226	0		13.4993
7250	Regions/clus3	26088	16226	0		11.6103
7251	Regions/clus3	26168	16226	0		13.9705
7252	Regions/clus3	26248	16226	0		11.6872
7253	Regions/clus3	26328	16226	0		10.2672
7254	Regions/clus3	26408	16226	0		9.35057
7255	Regions/clus3	26488	16226	0		8.65594
7256	Regions/clus3	26568	16226	0		9.46284
7300	Regions/clus3	31928	16226	0		11.2914
7301	Regions/clus3	32008	16226	0		11.7886
7302	Regions/clus3	32088	16226	0		14.577
7303	Regions/clus3	32168	16226	0		14.6516
7304	Regions/clus3	32248	16226	0		18.8579
7305	Regions/clus3	32328	16226	0		21.6139
7306	Regions/clus3	32408	16226	0		14.0449
7307	Regions/clus3	32488	16226	0		25.3426
7308	Regions/clus3	32568	16226	0		15.106
7309	Regions/clus3	32648	16226	0		9.17326
7310	Regions/clus3	32728	16226	0		7.14763
7312	Regions/clus3	25928	16146	0		15.7192
7313	Regions/clus3	26008	16146	0		10.222
7314	Regions/clus3	26088	16146	0		11.1116
7315	Regions/clus3	26168	16146	0		10.9154
7316	Regions/clus3	26248	16146	0		11.3613
7317	Regions/clus3	26328	16146	0		11.1853
7352	Regions/clus3	29128	16146	0		10.2448
7353	Regions/clus3	30888	16146	0		8.14125
7367	Regions/clus3	32008	16146	0		11.6569
7368	Regions/clus3	32088	16146	0		11.5244
7369	Regions/clus3	32168	16146	0		10.4607
7370	Regions/clus3	32248	16146	0		13.0171
7371	Regions/clus3	32328	16146	0		12.0974
7372	Regions/clus3	32408	16146	0		12.0199
7373	Regions/clus3	32488	16146	0		15.0002
7374	Regions/clus3	32568	16146	0		24.5101
7375	Regions/clus3	32648	16146	0		14.65
7379	Regions/clus3	25848	16066	0		17.1099
7380	Regions/clus3	25928	16066	0		15.8263
7381	Regions/clus3	26008	16066	0		10.1625
7382	Regions/clus3	26088	16066	0		11.4098
7383	Regions/clus3	26168	16066	0		10.5644
7384	Regions/clus3	26248	16066	0		9.22192
7436	Regions/clus3	32088	16066	0		9.33453
7437	Regions/clus3	32168	16066	0		10.1799
7438	Regions/clus3	32248	16066	0		10.5356
7439	Regions/clus3	32328	16066	0		9.97039
7440	Regions/clus3	32408	16066	0		11.1698
7441	Regions/clus3	32488	16066	0		11.4083
7442	Regions/clus3	32568	16066	0		12.8553
7443	Regions/clus3	32648	16066	0		12.2498
7444	Regions/clus3	32728	16066	0		17.2166
7445	Regions/clus3	32808	16066	0		16.1055
7448	Regions/clus3	25768	15986	0		11.185
7449	Regions/clus3	25848	15986	0		11.4602
7450	Regions/clus3	25928	15986	0		11.008
7451	Regions/clus3	26008	15986	0		10.4397
7452	Regions/clus3	26088	15986	0		9.32654
7453	Regions/clus3	26168	15986	0		9.35475
7509	Regions/clus3	32248	15986	0		9.95427
7510	Regions/clus3	32328	15986	0		9.8836
7511	Regions/clus3	32408	15986	0		10.3797
7512	Regions/clus3	32488	15986	0		12.5229
7513	Regions/clus3	32568	15986	0		10.5426
7514	Regions/clus3	32648	15986	0		11.5326
7515	Regions/clus3	32728	15986	0		12.172
7516	Regions/clus3	32808	15986	0		11.8747
7517	Regions/clus3	32888	15986	0		15.613
7518	Regions/clus3	32968	15986	0		7.95673
7519	Regions/clus3	33048	15986	0		6.46739
7520	Regions/clus3	25688	15906	0		10.9382
7521	Regions/clus3	25768	15906	0		9.27245
7522	Regions/clus3	25848	15906	0		10.3771
7523	Regions/clus3	25928	15906	0		9.85537
7524	Regions/clus3	26008	15906	0		8.94838
7525	Regions/clus3	26088	15906	0		9.70267
7527	Regions/clus3	26248	15906	0		9.04491
7583	Regions/clus3	32248	15906	0		9.71371
7585	Regions/clus3	32408	15906	0		9.66777
7586	Regions/clus3	32488	15906	0		9.44585
7587	Regions/clus3	32568	15906	0		10.8459
7588	Regions/clus3	32648	15906	0		9.39013
7589	Regions/clus3	32728	15906	0		9.64652
7590	Regions/clus3	32808	15906	0		10.8899
7591	Regions/clus3	32888	15906	0		13.3741
7592	Regions/clus3	32968	15906	0		14.9412
7593	Regions/clus3	33048	15906	0		9.34978
7594	Regions/clus3	33128	15906	0		10.4637
7595	Regions/clus3	25528	15826	0		14.1602
7596	Regions/clus3	25608	15826	0		10.9997
7597	Regions/clus3	25688	15826	0		8.96275
7598	Regions/clus3	25768	15826	0		10.0608
7599	Regions/clus3	25848	15826	0		8.95341
7600	Regions/clus3	25928	15826	0		8.11577
7666	Regions/clus3	32488	15826	0		9.89748
7667	Regions/clus3	32568	15826	0		9.47833
7669	Regions/clus3	32728	15826	0		7.90705
7670	Regions/clus3	32808	15826	0		10.4505
7671	Regions/clus3	32888	15826	0		10.38
7672	Regions/clus3	32968	15826	0		11.9982
7673	Regions/clus3	33048	15826	0		13.5184
7674	Regions/clus3	33128	15826	0		14.5948
7675	Regions/clus3	33208	15826	0		11.2862
7676	Regions/clus3	25448	15746	0		11.7286
7677	Regions/clus3	25528	15746	0		15.5687
7678	Regions/clus3	25608	15746	0		14.9738
7679	Regions/clus3	25688	15746	0		11.0364
7680	Regions/clus3	25768	15746	0		9.76998
7681	Regions/clus3	25848	15746	0		8.91109
7682	Regions/clus3	25928	15746	0		9.05496
7684	Regions/clus3	26088	15746	0		9.22712
7754	Regions/clus3	32648	15746	0		8.55569
7755	Regions/clus3	32728	15746	0		8.98682
7756	Regions/clus3	32808	15746	0		9.21332
7757	Regions/clus3	32888	15746	0		9.32008
7758	Regions/clus3	32968	15746	0		10.1367
7759	Regions/clus3	33048	15746	0		10.6747
7760	Regions/clus3	33128	15746	0		11.9653
7761	Regions/clus3	33208	15746	0		11.6149
7762	Regions/clus3	33288	15746	0		11.0079
7763	Regions/clus3	25368	15666	0		17.8919
7764	Regions/clus3	25448	15666	0		14.8703
7765	Regions/clus3	25528	15666	0		17.5804
7766	Regions/clus3	25608	15666	0		12.8568
7767	Regions/clus3	25688	15666	0		9.65046
7768	Regions/clus3	25768	15666	0		9.95868
7769	Regions/clus3	25848	15666	0		9.28561
7771	Regions/clus3	26008	15666	0		8.37569
7814	Regions/clus3	30248	15666	0		8.20191
7845	Regions/clus3	32728	15666	0		9.05303
7846	Regions/clus3	32808	15666	0		8.78427
7847	Regions/clus3	32888	15666	0		8.22406
7848	Regions/clus3	32968	15666	0		8.68625
7849	Regions/clus3	33048	15666	0		9.92544
7850	Regions/clus3	33128	15666	0		8.31108
7851	Regions/clus3	33208	15666	0		11.5362
7852	Regions/clus3	33288	15666	0		11.0785
7853	Regions/clus3	33368	15666	0		13.7128
7854	Regions/clus3	25288	15586	0		15.6631
7855	Regions/clus3	25368	15586	0		13.3738
7856	Regions/clus3	25448	15586	0		12.5142
7857	Regions/clus3	25528	15586	0		12.2128
7858	Regions/clus3	25608	15586	0		11.1091
7859	Regions/clus3	25688	15586	0		10.8734
7860	Regions/clus3	25768	15586	0		10.1014
7943	Regions/clus3	32888	15586	0		7.84364
7944	Regions/clus3	32968	15586	0		8.30249
7945	Regions/clus3	33048	15586	0		9.62555
7946	Regions/clus3	33128	15586	0		9.20085
7947	Regions/clus3	33208	15586	0		9.13959
7948	Regions/clus3	33288	15586	0		8.92414
7949	Regions/clus3	33368	15586	0		9.40926
7950	Regions/clus3	33448	15586	0		11.2814
7951	Regions/clus3	25208	15506	0		14.1576
7952	Regions/clus3	25288	15506	0		14.3045
7953	Regions/clus3	25368	15506	0		14.121
7954	Regions/clus3	25448	15506	0		11.8576
7955	Regions/clus3	25528	15506	0		9.74681
7956	Regions/clus3	25608	15506	0		8.76337
7957	Regions/clus3	25688	15506	0		9.14
8043	Regions/clus3	32808	15506	0		7.94999
8044	Regions/clus3	32888	15506	0		9.27119
8045	Regions/clus3	32968	15506	0		8.23772
8046	Regions/clus3	33048	15506	0		9.22188
8047	Regions/clus3	33128	15506	0		9.62153
8048	Regions/clus3	33208	15506	0		8.77412
8049	Regions/clus3	33288	15506	0		8.50451
8050	Regions/clus3	33368	15506	0		10.0573
8051	Regions/clus3	33448	15506	0		14.0401
8053	Regions/clus3	25128	15426	0		21.0347
8054	Regions/clus3	25208	15426	0		15.8324
8055	Regions/clus3	25288	15426	0		14.1707
8056	Regions/clus3	25368	15426	0		11.0443
8057	Regions/clus3	25448	15426	0		10.5236
8058	Regions/clus3	25528	15426	0		11.1741
8059	Regions/clus3	25608	15426	0		8.93813
8152	Regions/clus3	33048	15426	0		8.37272
8153	Regions/clus3	33128	15426	0		8.55408
8154	Regions/clus3	33208	15426	0		9.2034
8155	Regions/clus3	33288	15426	0		8.23249
8156	Regions/clus3	33368	15426	0		9.04219
8157	Regions/clus3	33448	15426	0		10.733
8158	Regions/clus3	33528	15426	0		15.0332
8159	Regions/clus3	33608	15426	0		8.75895
8160	Regions/clus3	24968	15346	0		13.2258
8161	Regions/clus3	25048	15346	0		12.5087
8162	Regions/clus3	25128	15346	0		19.911
8163	Regions/clus3	25208	15346	0		14.6268
8164	Regions/clus3	25288	15346	0		12.7572
8165	Regions/clus3	25368	15346	0		12.032
8166	Regions/clus3	25448	15346	0		10.2135
8167	Regions/clus3	25528	15346	0		9.19685
8262	Regions/clus3	33128	15346	0		9.21625
8263	Regions/clus3	33208	15346	0		7.38892
8264	Regions/clus3	33288	15346	0		9.15438
8265	Regions/clus3	33368	15346	0		8.23071
8266	Regions/clus3	33448	15346	0		8.95859
8267	Regions/clus3	33528	15346	0		12.4819
8268	Regions/clus3	33608	15346	0		13.7002
8269	Regions/clus3	33688	15346	0		5.684
8270	Regions/clus3	24888	15266	0		16.9989
8271	Regions/clus3	24968	15266	0		15.4208
8272	Regions/clus3	25048	15266	0		18.5074
8273	Regions/clus3	25128	15266	0		17.0729
8274	Regions/clus3	25208	15266	0		14.1499
8275	Regions/clus3	25288	15266	0		12.1767
8276	Regions/clus3	25368	15266	0		11.2376
8277	Regions/clus3	25448	15266	0		9.00296
8278	Regions/clus3	25528	15266	0		11.2674
8279	Regions/clus3	25608	15266	0		8.82242
8373	Regions/clus3	33128	15266	0		6.58663
8374	Regions/clus3	33208	15266	0		7.19871
8375	Regions/clus3	33288	15266	0		7.82635
8376	Regions/clus3	33368	15266	0		8.91076
8377	Regions/clus3	33448	15266	0		8.58862
8378	Regions/clus3	33528	15266	0		12.1757
8379	Regions/clus3	33608	15266	0		16.0963
8380	Regions/clus3	33688	15266	0		8.5323
8381	Regions/clus3	33768	15266	0		5.88955
8382	Regions/clus3	24808	15186	0		22.211
8383	Regions/clus3	24888	15186	0		16.1358
8384	Regions/clus3	24968	15186	0		16.1274
8385	Regions/clus3	25048	15186	0		19.4107
8386	Regions/clus3	25128	15186	0		15.1925
8387	Regions/clus3	25208	15186	0		13.4037
8388	Regions/clus3	25288	15186	0		12.3093
8389	Regions/clus3	25368	15186	0		12.0819
8390	Regions/clus3	25448	15186	0		10.3205
8487	Regions/clus3	33208	15186	0		7.502
8488	Regions/clus3	33288	15186	0		7.34026
8489	Regions/clus3	33368	15186	0		9.12343
8490	Regions/clus3	33448	15186	0		9.90547
8491	Regions/clus3	33528	15186	0		8.30728
8492	Regions/clus3	33608	15186	0		10.7128
8493	Regions/clus3	33688	15186	0		13.9751
8494	Regions/clus3	33768	15186	0		9.70564
8495	Regions/clus3	24728	15106	0		15.6649
8496	Regions/clus3	24808	15106	0		13.6455
8497	Regions/clus3	24888	15106	0		14.6573
8498	Regions/clus3	24968	15106	0		14.7948
8499	Regions/clus3	25048	15106	0		13.4118
8500	Regions/clus3	25128	15106	0		13.7355
8501	Regions/clus3	25208	15106	0		17.0404
8502	Regions/clus3	25288	15106	0		11.6766
8503	Regions/clus3	25368	15106	0		12.4104
8602	Regions/clus3	33288	15106	0		7.74266
8603	Regions/clus3	33368	15106	0		8.39541
8604	Regions/clus3	33448	15106	0		9.20434
8605	Regions/clus3	33528	15106	0		9.20315
8606	Regions/clus3	33608	15106	0		11.8724
8607	Regions/clus3	33688	15106	0		14.8899
8608	Regions/clus3	33768	15106	0		7.53537
8609	Regions/clus3	33848	15106	0		8.04938
8611	Regions/clus3	24728	15026	0		19.3239
8612	Regions/clus3	24808	15026	0		16.9027
8613	Regions/clus3	24888	15026	0		18.2197
8614	Regions/clus3	24968	15026	0		16.0444
8615	Regions/clus3	25048	15026	0		13.8935
8616	Regions/clus3	25128	15026	0		14.6439
8617	Regions/clus3	25208	15026	0		13.2007
8618	Regions/clus3	25288	15026	0		12.8937
8718	Regions/clus3	33288	15026	0		7.90975
8719	Regions/clus3	33368	15026	0		9.02143
8720	Regions/clus3	33448	15026	0		8.17908
8721	Regions/clus3	33528	15026	0		8.32809
8722	Regions/clus3	33608	15026	0		12.1514
8723	Regions/clus3	33688	15026	0		13.2637
8724	Regions/clus3	33768	15026	0		18.8286
8727	Regions/clus3	24648	14946	0		12.7835
8728	Regions/clus3	24728	14946	0		12.9842
8729	Regions/clus3	24808	14946	0		12.5852
8730	Regions/clus3	24888	14946	0		18.0389
8731	Regions/clus3	24968	14946	0		11.9982
8732	Regions/clus3	25048	14946	0		12.6958
8733	Regions/clus3	25128	14946	0		11.6001
8836	Regions/clus3	33368	14946	0		9.28715
8837	Regions/clus3	33448	14946	0		7.523
8838	Regions/clus3	33528	14946	0		8.85865
8839	Regions/clus3	33608	14946	0		9.61545
8840	Regions/clus3	33688	14946	0		11.9174
8841	Regions/clus3	33768	14946	0		17.3926
8842	Regions/clus3	33848	14946	0		9.81283
8844	Regions/clus3	24568	14866	0		12.1074
8845	Regions/clus3	24648	14866	0		25.0178
8846	Regions/clus3	24728	14866	0		14.4278
8847	Regions/clus3	24808	14866	0		18.5728
8848	Regions/clus3	24888	14866	0		16.5802
8849	Regions/clus3	24968	14866	0		14.3217
8850	Regions/clus3	25048	14866	0		13.1597
8851	Regions/clus3	25128	14866	0		11.9757
8955	Regions/clus3	33448	14866	0		8.38425
8956	Regions/clus3	33528	14866	0		9.23648
8957	Regions/clus3	33608	14866	0		8.99692
8958	Regions/clus3	33688	14866	0		13.5813
8959	Regions/clus3	33768	14866	0		14.5337
8960	Regions/clus3	33848	14866	0		16.7943
8962	Regions/clus3	24568	14786	0		9.00318
8963	Regions/clus3	24648	14786	0		10.8983
8964	Regions/clus3	24728	14786	0		16.069
8965	Regions/clus3	24808	14786	0		18.6878
8966	Regions/clus3	24888	14786	0		18.7947
8967	Regions/clus3	24968	14786	0		11.8789
8968	Regions/clus3	25048	14786	0		12.3097
9074	Regions/clus3	33528	14786	0		8.0122
9075	Regions/clus3	33608	14786	0		9.52813
9076	Regions/clus3	33688	14786	0		10.7422
9077	Regions/clus3	33768	14786	0		14.1653
9078	Regions/clus3	33848	14786	0		17.7797
9080	Regions/clus3	24488	14706	0		10.0702
9081	Regions/clus3	24568	14706	0		19.1811
9082	Regions/clus3	24648	14706	0		10.9265
9083	Regions/clus3	24728	14706	0		13.1366
9084	Regions/clus3	24808	14706	0		16.7568
9085	Regions/clus3	24888	14706	0		12.7584
9086	Regions/clus3	24968	14706	0		12.0688
9193	Regions/clus3	33528	14706	0		9.24984
9194	Regions/clus3	33608	14706	0		8.26379
9195	Regions/clus3	33688	14706	0		10.2829
9196	Regions/clus3	33768	14706	0		14.2018
9197	Regions/clus3	33848	14706	0		18.2728
9199	Regions/clus3	24488	14626	0		10.6384
9200	Regions/clus3	24568	14626	0		11.7264
9201	Regions/clus3	24648	14626	0		12.5424
9202	Regions/clus3	24728	14626	0		15.5904
9203	Regions/clus3	24808	14626	0		13.0314
9204	Regions/clus3	24888	14626	0		15.1476
9205	Regions/clus3	24968	14626	0		12.2867
9206	Regions/clus3	25048	14626	0		10.2549
9312	Regions/clus3	33528	14626	0		9.9385
9313	Regions/clus3	33608	14626	0		10.0841
9314	Regions/clus3	33688	14626	0		9.88676
9315	Regions/clus3	33768	14626	0		14.3988
9316	Regions/clus3	33848	14626	0		18.4645
9317	Regions/clus3	33928	14626	0		14.6482
9318	Regions/clus3	24488	14546	0		12.5001
9319	Regions/clus3	24568	14546	0		15.4709
9320	Regions/clus3	24648	14546	0		21.0794
9321	Regions/clus3	24728	14546	0		25.5432
9322	Regions/clus3	24808	14546	0		16.1186
9323	Regions/clus3	24888	14546	0		15.6288
9324	Regions/clus3	24968	14546	0		10.8113
9432	Regions/clus3	33608	14546	0		8.64542
9433	Regions/clus3	33688	14546	0		9.94009
9434	Regions/clus3	33768	14546	0		10.6807
9435	Regions/clus3	33848	14546	0		13.9983
9436	Regions/clus3	33928	14546	0		16.7708
9437	Regions/clus3	24488	14466	0		15.3615
9438	Regions/clus3	24568	14466	0		15.4167
9439	Regions/clus3	24648	14466	0		17.2682
9440	Regions/clus3	24728	14466	0		18.282
9441	Regions/clus3	24808	14466	0		16.6166
9442	Regions/clus3	24888	14466	0		15.0905
9443	Regions/clus3	24968	14466	0		11.5053
9551	Regions/clus3	33608	14466	0		9.93495
9552	Regions/clus3	33688	14466	0		10.5223
9553	Regions/clus3	33768	14466	0		10.8386
9554	Regions/clus3	33848	14466	0		10.6451
9555	Regions/clus3	33928	14466	0		24.9594
9557	Regions/clus3	24408	14386	0		23.6598
9558	Regions/clus3	24488	14386	0		18.8545
9559	Regions/clus3	24568	14386	0		16.7225
9560	Regions/clus3	24648	14386	0		19.8416
9561	Regions/clus3	24728	14386	0		13.568
9562	Regions/clus3	24808	14386	0		12.0691
9563	Regions/clus3	24888	14386	0		10.7216
9672	Regions/clus3	33608	14386	0		9.5729
9673	Regions/clus3	33688	14386	0		9.61733
9674	Regions/clus3	33768	14386	0		11.1562
9675	Regions/clus3	33848	14386	0		13.543
9676	Regions/clus3	33928	14386	0		21.6892
9678	Regions/clus3	24408	14306	0		25.3622
9679	Regions/clus3	24488	14306	0		17.2284
9680	Regions/clus3	24568	14306	0		14.905
9681	Regions/clus3	24648	14306	0		13.5656
9682	Regions/clus3	24728	14306	0		11.1846
9683	Regions/clus3	24808	14306	0		10.036
9793	Regions/clus3	33608	14306	0		8.46195
9794	Regions/clus3	33688	14306	0		9.47736
9795	Regions/clus3	33768	14306	0		9.28037
9796	Regions/clus3	33848	14306	0		11.7603
9797	Regions/clus3	33928	14306	0		19.1465
9799	Regions/clus3	24408	14226	0		15.2616
9800	Regions/clus3	24488	14226	0		15.2871
9801	Regions/clus3	24568	14226	0		17.3879
9802	Regions/clus3	24648	14226	0		13.136
9803	Regions/clus3	24728	14226	0		10.2604
9804	Regions/clus3	24808	14226	0		10.6901
9805	Regions/clus3	24888	14226	0		11.0284
9914	Regions/clus3	33608	14226	0		8.4552
9915	Regions/clus3	33688	14226	0		8.53406
9916	Regions/clus3	33768	14226	0		9.17537
9917	Regions/clus3	33848	14226	0		11.381
9918	Regions/clus3	33928	14226	0		17.4797
9920	Regions/clus3	34088	14226	0		7.56181
9921	Regions/clus3	24408	14146	0		25.5274
9922	Regions/clus3	24488	14146	0		18.3589
9923	Regions/clus3	24568	14146	0		15.9384
9924	Regions/clus3	24648	14146	0		14.3616
9925	Regions/clus3	24728	14146	0		13.8361
9926	Regions/clus3	24808	14146	0		11.6754
10037	Regions/clus3	33688	14146	0		9.7132
10038	Regions/clus3	33768	14146	0		8.46321
10039	Regions/clus3	33848	14146	0		10.0184
10040	Regions/clus3	33928	14146	0		16.0167
10041	Regions/clus3	34008	14146	0		8.46103
10043	Regions/clus3	24408	14066	0		18.5819
10044	Regions/clus3	24488	14066	0		14.4762
10045	Regions/clus3	24568	14066	0		15.856
10046	Regions/clus3	24648	14066	0		12.9519
10047	Regions/clus3	24728	14066	0		11.5632
10048	Regions/clus3	24808	14066	0		9.27018
10158	Regions/clus3	33608	14066	0		8.60985
10159	Regions/clus3	33688	14066	0		8.7179
10160	Regions/clus3	33768	14066	0		9.64309
10161	Regions/clus3	33848	14066	0		10.2204
10162	Regions/clus3	33928	14066	0		10.8842
10163	Regions/clus3	34008	14066	0		7.70752
10165	Regions/clus3	24328	13986	0		10.8881
10166	Regions/clus3	24408	13986	0		20.9104
10167	Regions/clus3	24488	13986	0		18.4608
10168	Regions/clus3	24568	13986	0		17.1799
10169	Regions/clus3	24648	13986	0		11.4326
10170	Regions/clus3	24728	13986	0		11.9113
10171	Regions/clus3	24808	13986	0		9.25955
10172	Regions/clus3	24888	13986	0		8.40235
10281	Regions/clus3	33608	13986	0		8.61868
10282	Regions/clus3	33688	13986	0		10.1909
10283	Regions/clus3	33768	13986	0		9.56109
10284	Regions/clus3	33848	13986	0		10.2839
10285	Regions/clus3	33928	13986	0		11.0771
10286	Regions/clus3	34008	13986	0		11.6202
10288	Regions/clus3	24328	13906	0		14.0565
10289	Regions/clus3	24408	13906	0		12.3822
10290	Regions/clus3	24488	13906	0		14.8876
10291	Regions/clus3	24568	13906	0		15.4439
10292	Regions/clus3	24648	13906	0		12.8339
10293	Regions/clus3	24728	13906	0		11.5662
10294	Regions/clus3	24808	13906	0		11.883
10295	Regions/clus3	24888	13906	0		9.35031
10403	Regions/clus3	33528	13906	0		7.40954
10404	Regions/clus3	33608	13906	0		8.51865
10405	Regions/clus3	33688	13906	0		9.11741
10406	Regions/clus3	33768	13906	0		10.2787
10407	Regions/clus3	33848	13906	0		10.9335
10408	Regions/clus3	33928	13906	0		14.7746
10409	Regions/clus3	34008	13906	0		22.1381
10411	Regions/clus3	34168	13906	0		9.06052
10412	Regions/clus3	24328	13826	0		12.7771
10413	Regions/clus3	24408	13826	0		17.3399
10414	Regions/clus3	24488	13826	0		16.2113
10415	Regions/clus3	24568	13826	0		14.5221
10416	Regions/clus3	24648	13826	0		12.446
10417	Regions/clus3	24728	13826	0		10.944
10418	Regions/clus3	24808	13826	0		10.2149
10419	Regions/clus3	24888	13826	0		10.1308
10527	Regions/clus3	33528	13826	0		8.82963
10528	Regions/clus3	33608	13826	0		8.14837
10529	Regions/clus3	33688	13826	0		10.5467
10530	Regions/clus3	33768	13826	0		10.6988
10531	Regions/clus3	33848	13826	0		12.9675
10532	Regions/clus3	33928	13826	0		12.7442
10535	Regions/clus3	34168	13826	0		6.61616
10536	Regions/clus3	24328	13746	0		12.0631
10537	Regions/clus3	24408	13746	0		12.1085
10538	Regions/clus3	24488	13746	0		13.9654
10539	Regions/clus3	24568	13746	0		13.1033
10540	Regions/clus3	24648	13746	0		11.834
10541	Regions/clus3	24728	13746	0		10.3636
10542	Regions/clus3	24808	13746	0		10.9399
10543	Regions/clus3	24888	13746	0		9.71708
10544	Regions/clus3	24968	13746	0		10.7788
10545	Regions/clus3	25048	13746	0		10.1466
10651	Regions/clus3	33528	13746	0		10.8113
10652	Regions/clus3	33608	13746	0		10.2154
10653	Regions/clus3	33688	13746	0		8.41676
10654	Regions/clus3	33768	13746	0		10.1484
10655	Regions/clus3	33848	13746	0		11.8165
10656	Regions/clus3	33928	13746	0		19.2332
10658	Regions/clus3	34088	13746	0		8.37557
10660	Regions/clus3	24408	13666	0		17.0809
10661	Regions/clus3	24488	13666	0		15.3942
10662	Regions/clus3	24568	13666	0		12.6365
10663	Regions/clus3	24648	13666	0		12.0032
10664	Regions/clus3	24728	13666	0		10.5093
10665	Regions/clus3	24808	13666	0		10.5124
10666	Regions/clus3	24888	13666	0		10.429
10774	Regions/clus3	33528	13666	0		9.06227
10775	Regions/clus3	33608	13666	0		10.3009
10776	Regions/clus3	33688	13666	0		8.33174
10777	Regions/clus3	33768	13666	0		10.6062
10778	Regions/clus3	33848	13666	0		12.2906
10779	Regions/clus3	33928	13666	0		27.4855
10780	Regions/clus3	34008	13666	0		9.54203
10782	Regions/clus3	24408	13586	0		12.568
10783	Regions/clus3	24488	13586	0		15.9324
10784	Regions/clus3	24568	13586	0		13.1145
10785	Regions/clus3	24648	13586	0		10.6919
10786	Regions/clus3	24728	13586	0		12.394
10787	Regions/clus3	24808	13586	0		13.477
10789	Regions/clus3	24968	13586	0		9.543
10896	Regions/clus3	33528	13586	0		8.56659
10897	Regions/clus3	33608	13586	0		9.14158
10898	Regions/clus3	33688	13586	0		10.0188
10899	Regions/clus3	33768	13586	0		10.9376
10900	Regions/clus3	33848	13586	0		13.4552
10901	Regions/clus3	33928	13586	0		26.998
10904	Regions/clus3	24408	13506	0		17.0779
10905	Regions/clus3	24488	13506	0		9.7767
10906	Regions/clus3	24568	13506	0		11.6789
10907	Regions/clus3	24648	13506	0		9.88831
10908	Regions/clus3	24728	13506	0		10.5713
10909	Regions/clus3	24808	13506	0		10.2351
10910	Regions/clus3	24888	13506	0		9.74305
10911	Regions/clus3	24968	13506	0		10.699
10912	Regions/clus3	25048	13506	0		10.6202
11018	Regions/clus3	33528	13506	0		9.54951
11019	Regions/clus3	33608	13506	0		9.74678
11020	Regions/clus3	33688	13506	0		11.4676
11021	Regions/clus3	33768	13506	0		12.9986
11022	Regions/clus3	33848	13506	0		14.936
11023	Regions/clus3	33928	13506	0		22.3925
11025	Regions/clus3	24408	13426	0		13.1952
11026	Regions/clus3	24488	13426	0		13.9469
11027	Regions/clus3	24568	13426	0		13.4666
11028	Regions/clus3	24648	13426	0		10.7275
11029	Regions/clus3	24728	13426	0		9.68858
11030	Regions/clus3	24808	13426	0		10.1564
11031	Regions/clus3	24888	13426	0		11.2356
11032	Regions/clus3	24968	13426	0		10.388
11140	Regions/clus3	33608	13426	0		9.94528
11141	Regions/clus3	33688	13426	0		9.53984
11142	Regions/clus3	33768	13426	0		10.562
11143	Regions/clus3	33848	13426	0		11.7886
11144	Regions/clus3	33928	13426	0		20.8535
11145	Regions/clus3	34008	13426	0		23.0264
11146	Regions/clus3	24488	13346	0		10.9674
11147	Regions/clus3	24568	13346	0		14.1528
11148	Regions/clus3	24648	13346	0		12.9934
11149	Regions/clus3	24728	13346	0		10.3909
11150	Regions/clus3	24808	13346	0		12.6236
11151	Regions/clus3	24888	13346	0		9.58079
11152	Regions/clus3	24968	13346	0		10.9153
11153	Regions/clus3	25048	13346	0		10.8086
11154	Regions/clus3	25128	13346	0		8.5852
11260	Regions/clus3	33608	13346	0		9.47181
11261	Regions/clus3	33688	13346	0		9.65589
11262	Regions/clus3	33768	13346	0		11.4034
11263	Regions/clus3	33848	13346	0		16.9967
11264	Regions/clus3	33928	13346	0		16.2815
11265	Regions/clus3	24488	13266	0		8.97381
11266	Regions/clus3	24568	13266	0		12.6408
11267	Regions/clus3	24648	13266	0		11.844
11268	Regions/clus3	24728	13266	0		10.6331
11269	Regions/clus3	24808	13266	0		10.9952
11270	Regions/clus3	24888	13266	0		10.4963
11271	Regions/clus3	24968	13266	0		11.6002
11379	Regions/clus3	33608	13266	0		11.7894
11380	Regions/clus3	33688	13266	0		11.4063
11381	Regions/clus3	33768	13266	0		10.697
11382	Regions/clus3	33848	13266	0		16.4417
11384	Regions/clus3	24488	13186	0		10.9331
11385	Regions/clus3	24568	13186	0		10.4632
11386	Regions/clus3	24648	13186	0		12.5785
11387	Regions/clus3	24728	13186	0		10.4664
11388	Regions/clus3	24808	13186	0		11.0866
11389	Regions/clus3	24888	13186	0		11.7732
11390	Regions/clus3	24968	13186	0		12.112
11498	Regions/clus3	33608	13186	0		10.3051
11499	Regions/clus3	33688	13186	0		11.1437
11500	Regions/clus3	33768	13186	0		13.2644
11501	Regions/clus3	33848	13186	0		16.8845
11503	Regions/clus3	24568	13106	0		11.0335
11504	Regions/clus3	24648	13106	0		12.3384
11505	Regions/clus3	24728	13106	0		12.351
11506	Regions/clus3	24808	13106	0		12.8731
11617	Regions/clus3	33688	13106	0		11.5433
11618	Regions/clus3	33768	13106	0		11.8697
11619	Regions/clus3	33848	13106	0		15.2954
11620	Regions/clus3	24568	13026	0		10.0127
11621	Regions/clus3	24648	13026	0		12.8644
11622	Regions/clus3	24728	13026	0		12.1532
11623	Regions/clus3	24808	13026	0		12.0002
11730	Regions/clus3	33368	13026	0		9.13578
11733	Regions/clus3	33608	13026	0		10.1432
11734	Regions/clus3	33688	13026	0		10.3778
11735	Regions/clus3	33768	13026	0		12.0187
11736	Regions/clus3	33848	13026	0		15.3304
11737	Regions/clus3	24568	12946	0		9.33871
11738	Regions/clus3	24648	12946	0		12.7355
11739	Regions/clus3	24728	12946	0		12.1282
11740	Regions/clus3	24808	12946	0		12.4558
11850	Regions/clus3	33608	12946	0		9.66554
11851	Regions/clus3	33688	12946	0		11.5712
11852	Regions/clus3	33768	12946	0		11.8187
11853	Regions/clus3	24648	12866	0		9.55264
11854	Regions/clus3	24728	12866	0		13.6765
11855	Regions/clus3	24808	12866	0		14.0439
11856	Regions/clus3	24888	12866	0		10.9036
11857	Regions/clus3	24968	12866	0		11.7348
11963	Regions/clus3	33448	12866	0		9.57739
11964	Regions/clus3	33528	12866	0		8.91794
11965	Regions/clus3	33608	12866	0		9.70423
11966	Regions/clus3	33688	12866	0		11.321
11967	Regions/clus3	33768	12866	0		19.456
11968	Regions/clus3	24648	12786	0		11.207
11969	Regions/clus3	24728	12786	0		10.2145
11970	Regions/clus3	24808	12786	0		11.3559
11973	Regions/clus3	25048	12786	0		10.7151
12077	Regions/clus3	33368	12786	0		10.3362
12079	Regions/clus3	33528	12786	0		8.74701
12080	Regions/clus3	33608	12786	0		9.50357
12081	Regions/clus3	33688	12786	0		12.5969
12082	Regions/clus3	24648	12706	0		9.22973
12083	Regions/clus3	24728	12706	0		11.0646
12084	Regions/clus3	24808	12706	0		11.3535
12085	Regions/clus3	24888	12706	0		11.1754
12086	Regions/clus3	24968	12706	0		17.7037
12191	Regions/clus3	33368	12706	0		8.8941
12192	Regions/clus3	33448	12706	0		11.4946
12193	Regions/clus3	33528	12706	0		11.1562
12194	Regions/clus3	33608	12706	0		10.2334
12195	Regions/clus3	33688	12706	0		14.6959
12196	Regions/clus3	24648	12626	0		12.0458
12197	Regions/clus3	24728	12626	0		11.3007
12198	Regions/clus3	24808	12626	0		12.8567
12199	Regions/clus3	24888	12626	0		12.8733
12202	Regions/clus3	25128	12626	0		9.00106
12305	Regions/clus3	33368	12626	0		10.5504
12306	Regions/clus3	33448	12626	0		11.5146
12307	Regions/clus3	33528	12626	0		9.77087
12308	Regions/clus3	33608	12626	0		10.5771
12309	Regions/clus3	33688	12626	0		12.0383
12311	Regions/clus3	24808	12546	0		14.1259
12312	Regions/clus3	24888	12546	0		14.7654
12315	Regions/clus3	25128	12546	0		10.2481
12417	Regions/clus3	33288	12546	0		12.2702
12418	Regions/clus3	33368	12546	0		11.9568
12419	Regions/clus3	33448	12546	0		12.3403
12420	Regions/clus3	33528	12546	0		10.1341
12421	Regions/clus3	33608	12546	0		12.344
12422	Regions/clus3	24728	12466	0		11.63
12423	Regions/clus3	24808	12466	0		11.4158
12424	Regions/clus3	24888	12466	0		11.6897
12425	Regions/clus3	24968	12466	0		11.2599
12426	Regions/clus3	25048	12466	0		11.0701
12428	Regions/clus3	25208	12466	0		10.0305
12530	Regions/clus3	33368	12466	0		11.6199
12531	Regions/clus3	33448	12466	0		13.3712
12532	Regions/clus3	33528	12466	0		11.7885
12533	Regions/clus3	33608	12466	0		11.0045
12534	Regions/clus3	24808	12386	0		12.3418
12535	Regions/clus3	24888	12386	0		10.2441
12536	Regions/clus3	24968	12386	0		13.1161
12537	Regions/clus3	25048	12386	0		12.8986
12538	Regions/clus3	25128	12386	0		11.9987
12539	Regions/clus3	25208	12386	0		11.2173
12638	Regions/clus3	33128	12386	0		10.975
12639	Regions/clus3	33208	12386	0		10.3471
12640	Regions/clus3	33288	12386	0		11.8155
12641	Regions/clus3	33368	12386	0		13.0824
12642	Regions/clus3	33448	12386	0		10.6207
12643	Regions/clus3	33528	12386	0		13.1358
12644	Regions/clus3	24808	12306	0		10.8286
12645	Regions/clus3	24888	12306	0		12.8315
12646	Regions/clus3	24968	12306	0		12.6662
12647	Regions/clus3	25048	12306	0		10.6169
12648	Regions/clus3	25128	12306	0		12.1269
12649	Regions/clus3	25208	12306	0		12.9257
12650	Regions/clus3	25288	12306	0		12.5432
12747	Regions/clus3	33048	12306	0		10.533
12748	Regions/clus3	33128	12306	0		10.7019
12749	Regions/clus3	33208	12306	0		12.5207
12750	Regions/clus3	33288	12306	0		12.1723
12751	Regions/clus3	33368	12306	0		15.4055
12752	Regions/clus3	33448	12306	0		14.0103
12753	Regions/clus3	33528	12306	0		13.4066
12754	Regions/clus3	24888	12226	0		13.0475
12755	Regions/clus3	24968	12226	0		12.5925
12756	Regions/clus3	25048	12226	0		13.4299
12757	Regions/clus3	25128	12226	0		12.611
12758	Regions/clus3	25208	12226	0		12.4804
12759	Regions/clus3	25288	12226	0		10.3759
12760	Regions/clus3	25368	12226	0		11.9126
12855	Regions/clus3	32968	12226	0		11.2757
12857	Regions/clus3	33128	12226	0		11.0933
12858	Regions/clus3	33208	12226	0		11.7118
12859	Regions/clus3	33288	12226	0		11.5995
12860	Regions/clus3	33368	12226	0		12.7841
12861	Regions/clus3	33448	12226	0		12.6729
12862	Regions/clus3	24888	12146	0		11.447
12863	Regions/clus3	24968	12146	0		14.914
12864	Regions/clus3	25048	12146	0		15.7574
12865	Regions/clus3	25128	12146	0		16.8417
12866	Regions/clus3	25208	12146	0		12.8213
12867	Regions/clus3	25288	12146	0		12.4032
12870	Regions/clus3	25528	12146	0		9.99218
12952	Regions/clus3	32088	12146	0		9.80733
12957	Regions/clus3	32488	12146	0		9.38097
12963	Regions/clus3	32968	12146	0		10.7129
12964	Regions/clus3	33048	12146	0		11.5247
12965	Regions/clus3	33128	12146	0		12.5757
12966	Regions/clus3	33208	12146	0		13.7726
12967	Regions/clus3	33288	12146	0		11.9479
12968	Regions/clus3	33368	12146	0		13.9231
12969	Regions/clus3	33448	12146	0		13.5271
12970	Regions/clus3	24968	12066	0		14.2797
12971	Regions/clus3	25048	12066	0		10.3313
12972	Regions/clus3	25128	12066	0		12.8014
12973	Regions/clus3	25208	12066	0		13.1027
12974	Regions/clus3	25288	12066	0		12.8571
12975	Regions/clus3	25368	12066	0		11.8668
12976	Regions/clus3	25448	12066	0		10.9105
13059	Regions/clus3	32088	12066	0		10.1266
13069	Regions/clus3	32888	12066	0		9.93426
13070	Regions/clus3	32968	12066	0		11.5803
13071	Regions/clus3	33048	12066	0		11.7748
13072	Regions/clus3	33128	12066	0		13.5587
13073	Regions/clus3	33208	12066	0		12.1644
13074	Regions/clus3	33288	12066	0		13.3376
13075	Regions/clus3	33368	12066	0		12.1139
13076	Regions/clus3	33448	12066	0		16.7435
13077	Regions/clus3	25048	11986	0		11.6121
13078	Regions/clus3	25128	11986	0		12.3026
13079	Regions/clus3	25208	11986	0		12.4459
13080	Regions/clus3	25288	11986	0		12.1152
13081	Regions/clus3	25368	11986	0		13.1808
13082	Regions/clus3	25448	11986	0		10.706
13169	Regions/clus3	32408	11986	0		10.8544
13171	Regions/clus3	32568	11986	0		10.1059
13174	Regions/clus3	32808	11986	0		11.7394
13175	Regions/clus3	32888	11986	0		13.7947
13176	Regions/clus3	32968	11986	0		11.5794
13177	Regions/clus3	33048	11986	0		11.5077
13178	Regions/clus3	33128	11986	0		11.344
13179	Regions/clus3	33208	11986	0		10.8498
13180	Regions/clus3	33288	11986	0		9.66302
13181	Regions/clus3	33368	11986	0		14.0687
13182	Regions/clus3	25048	11906	0		14.3658
13183	Regions/clus3	25128	11906	0		13.7093
13184	Regions/clus3	25208	11906	0		12.9487
13185	Regions/clus3	25288	11906	0		13.7345
13186	Regions/clus3	25368	11906	0		12.9482
13187	Regions/clus3	25448	11906	0		12.9516
13188	Regions/clus3	25528	11906	0		11.7845
13189	Regions/clus3	25608	11906	0		11.1835
13267	Regions/clus3	31848	11906	0		10.8149
13270	Regions/clus3	32088	11906	0		10.8104
13272	Regions/clus3	32248	11906	0		10.9487
13273	Regions/clus3	32328	11906	0		11.4369
13275	Regions/clus3	32488	11906	0		11.0444
13277	Regions/clus3	32648	11906	0		11.1674
13278	Regions/clus3	32728	11906	0		11.6866
13279	Regions/clus3	32808	11906	0		13.2631
13280	Regions/clus3	32888	11906	0		12.1516
13281	Regions/clus3	32968	11906	0		14.0345
13282	Regions/clus3	33048	11906	0		16.718
13283	Regions/clus3	33128	11906	0		15.0738
13284	Regions/clus3	33208	11906	0		16.1841
13285	Regions/clus3	33288	11906	0		17.4585
13286	Regions/clus3	33368	11906	0		16.3895
13287	Regions/clus3	25128	11826	0		16.6728
13288	Regions/clus3	25208	11826	0		11.8887
13289	Regions/clus3	25288	11826	0		14.8976
13290	Regions/clus3	25368	11826	0		14.0183
13291	Regions/clus3	25448	11826	0		12.223
13292	Regions/clus3	25528	11826	0		11.7909
13293	Regions/clus3	25608	11826	0		10.8429
13294	Regions/clus3	25688	11826	0		10.4451
13368	Regions/clus3	31608	11826	0		12.1831
13371	Regions/clus3	31848	11826	0		10.6915
13372	Regions/clus3	31928	11826	0		9.53755
13373	Regions/clus3	32008	11826	0		11.5237
13374	Regions/clus3	32088	11826	0		11.7871
13375	Regions/clus3	32168	11826	0		13.8404
13376	Regions/clus3	32248	11826	0		12.9664
13377	Regions/clus3	32328	11826	0		13.0259
13378	Regions/clus3	32408	11826	0		11.9479
13379	Regions/clus3	32488	11826	0		11.5154
13380	Regions/clus3	32568	11826	0		12.725
13381	Regions/clus3	32648	11826	0		11.8293
13382	Regions/clus3	32728	11826	0		12.2272
13383	Regions/clus3	32808	11826	0		14.3028
13384	Regions/clus3	32888	11826	0		14.2782
13385	Regions/clus3	32968	11826	0		15.7737
13386	Regions/clus3	33048	11826	0		20.8266
13387	Regions/clus3	33128	11826	0		14.3314
13388	Regions/clus3	33208	11826	0		11.3053
13389	Regions/clus3	33288	11826	0		12.1434
13391	Regions/clus3	25208	11746	0		15.6363
13392	Regions/clus3	25288	11746	0		11.5029
13393	Regions/clus3	25368	11746	0		12.4553
13394	Regions/clus3	25448	11746	0		11.6461
13395	Regions/clus3	25528	11746	0		12.8368
13396	Regions/clus3	25608	11746	0		10.5771
13468	Regions/clus3	32488	11746	0		13.459
13469	Regions/clus3	32568	11746	0		15.7202
13470	Regions/clus3	32648	11746	0		13.9048
13471	Regions/clus3	32728	11746	0		15.011
13472	Regions/clus3	32808	11746	0		12.4742
13473	Regions/clus3	32888	11746	0		13.7299
13474	Regions/clus3	32968	11746	0		19.1553
13475	Regions/clus3	33048	11746	0		27.0504
13476	Regions/clus3	33128	11746	0		18.4236
13478	Regions/clus3	25288	11666	0		11.7143
13479	Regions/clus3	25368	11666	0		13.9164
13480	Regions/clus3	25448	11666	0		12.84
13481	Regions/clus3	25528	11666	0		14.3024
13482	Regions/clus3	25608	11666	0		14.0739
13483	Regions/clus3	25688	11666	0		11.5864
13486	Regions/clus3	25928	11666	0		10.8591
13489	Regions/clus3	26168	11666	0		12.4053
13509	Regions/clus3	32408	11666	0		21.4331
13511	Regions/clus3	25368	11586	0		16.0232
13512	Regions/clus3	25448	11586	0		18.0737
13513	Regions/clus3	25528	11586	0		11.6452
13514	Regions/clus3	25608	11586	0		13.3715
13515	Regions/clus3	25688	11586	0		13.6971
13516	Regions/clus3	25768	11586	0		10.6034
13519	Regions/clus3	26008	11586	0		11.9734
13520	Regions/clus3	26088	11586	0		13.0608
13521	Regions/clus3	26168	11586	0		12.792
13536	Regions/clus3	25528	11506	0		12.3231
13537	Regions/clus3	25608	11506	0		14.6896
13538	Regions/clus3	25688	11506	0		14.8561
13539	Regions/clus3	25768	11506	0		13.9258
13540	Regions/clus3	25848	11506	0		12.9671
13541	Regions/clus3	25928	11506	0		14.4508
13542	Regions/clus3	26008	11506	0		11.8545
13543	Regions/clus3	26088	11506	0		13.9632
13554	Regions/clus3	25688	11426	0		15.3764
13555	Regions/clus3	25768	11426	0		16.1727
13556	Regions/clus3	25848	11426	0		10.2363
13557	Regions/clus3	25928	11426	0		13.1974
13558	Regions/clus3	26008	11426	0		16.1926
13559	Regions/clus3	26088	11426	0		14.179
13565	Regions/clus3	25848	11346	0		15.9181
13566	Regions/clus3	25928	11346	0		15.025
13568	Regions/clus3	26088	11346	0		18.6438
13569	Regions/clus3	15528	17506	0		5.12473
13570	Regions/clus3	15608	17506	0		4.46954
13573	Regions/clus3	15848	17506	0		8.41759
13574	Regions/clus3	15928	17506	0		7.08151
13583	Regions/clus3	18488	17506	0		4.78535
13585	Regions/clus3	15368	17426	0		6.38572
13586	Regions/clus3	15448	17426	0		2.87335
13587	Regions/clus3	15528	17426	0		5.16134
13589	Regions/clus3	15688	17426	0		6.01946
13591	Regions/clus3	15848	17426	0		8.74645
13597	Regions/clus3	16328	17426	0		18.2868
13611	Regions/clus3	18808	17426	0		6.00668
13612	Regions/clus3	15048	17346	0		6.29676
13615	Regions/clus3	15288	17346	0		5.68485
13616	Regions/clus3	15368	17346	0		8.65592
13617	Regions/clus3	15448	17346	0		10.2395
13618	Regions/clus3	15528	17346	0		7.96202
13619	Regions/clus3	15608	17346	0		12.4115
13620	Regions/clus3	15688	17346	0		15.3738
13621	Regions/clus3	15768	17346	0		8.10147
13622	Regions/clus3	15848	17346	0		9.55956
13623	Regions/clus3	15928	17346	0		21.5028
13624	Regions/clus3	16008	17346	0		16.4926
13625	Regions/clus3	16088	17346	0		15.9085
13626	Regions/clus3	16168	17346	0		10.816
13627	Regions/clus3	16248	17346	0		10.9227
13628	Regions/clus3	16328	17346	0		11.5512
13629	Regions/clus3	16408	17346	0		13.8245
13630	Regions/clus3	16488	17346	0		11.1621
13635	Regions/clus3	17688	17346	0		14.6713
13638	Regions/clus3	17928	17346	0		16.5511
13639	Regions/clus3	18008	17346	0		17.2466
13640	Regions/clus3	18088	17346	0		20.3044
13641	Regions/clus3	18168	17346	0		15.2509
13642	Regions/clus3	18248	17346	0		14.5051
13643	Regions/clus3	18328	17346	0		20.2482
13644	Regions/clus3	18408	17346	0		16.1357
13645	Regions/clus3	18488	17346	0		9.51271
13646	Regions/clus3	18568	17346	0		15.3078
13647	Regions/clus3	18648	17346	0		10.6723
13648	Regions/clus3	18728	17346	0		15.6469
13649	Regions/clus3	18808	17346	0		19.3498
13650	Regions/clus3	18888	17346	0		19.8977
13651	Regions/clus3	18968	17346	0		13.7917
13652	Regions/clus3	19048	17346	0		16.1241
13653	Regions/clus3	19128	17346	0		10.2881
13661	Regions/clus3	15288	17266	0		9.34108
13662	Regions/clus3	15368	17266	0		14
13663	Regions/clus3	15448	17266	0		13.67
13664	Regions/clus3	15528	17266	0		12.0264
13665	Regions/clus3	15608	17266	0		15.8136
13666	Regions/clus3	15688	17266	0		12.6162
13667	Regions/clus3	15768	17266	0		9.68909
13668	Regions/clus3	15848	17266	0		10.7923
13669	Regions/clus3	15928	17266	0		12.6725
13670	Regions/clus3	16008	17266	0		15.4402
13671	Regions/clus3	16088	17266	0		12.2717
13672	Regions/clus3	16168	17266	0		13.2084
13673	Regions/clus3	16248	17266	0		10.9977
13674	Regions/clus3	16328	17266	0		11.6876
13682	Regions/clus3	16968	17266	0		10.6748
13692	Regions/clus3	18008	17266	0		14.6661
13693	Regions/clus3	18088	17266	0		11.0789
13695	Regions/clus3	18248	17266	0		19.4436
13698	Regions/clus3	18488	17266	0		19.2658
13699	Regions/clus3	18568	17266	0		17.1194
13700	Regions/clus3	18648	17266	0		17.0475
13701	Regions/clus3	18728	17266	0		19.2502
13702	Regions/clus3	18808	17266	0		20.3741
13703	Regions/clus3	18888	17266	0		14.7844
13704	Regions/clus3	18968	17266	0		19.0064
13705	Regions/clus3	19048	17266	0		14.4123
13706	Regions/clus3	19128	17266	0		10.8107
13707	Regions/clus3	19208	17266	0		8.52654
13709	Regions/clus3	19368	17266	0		17.5837
13710	Regions/clus3	19448	17266	0		22.6614
13717	Regions/clus3	14968	17186	0		11.1635
13718	Regions/clus3	15048	17186	0		10.2574
13719	Regions/clus3	15128	17186	0		12.1818
13720	Regions/clus3	15208	17186	0		18.6254
13721	Regions/clus3	15288	17186	0		16.2491
13722	Regions/clus3	15368	17186	0		13.451
13723	Regions/clus3	15448	17186	0		14.478
13724	Regions/clus3	15528	17186	0		12.8328
13725	Regions/clus3	15608	17186	0		14.4152
13726	Regions/clus3	15688	17186	0		10.8403
13727	Regions/clus3	15768	17186	0		11.0319
13728	Regions/clus3	15848	17186	0		13.5096
13729	Regions/clus3	15928	17186	0		12.0376
13730	Regions/clus3	16008	17186	0		11.048
13731	Regions/clus3	16088	17186	0		11.1938
13732	Regions/clus3	16168	17186	0		9.46309
13743	Regions/clus3	17048	17186	0		12.2923
13745	Regions/clus3	17208	17186	0		15.7146
13746	Regions/clus3	17288	17186	0		10.0353
13751	Regions/clus3	17688	17186	0		19.4287
13752	Regions/clus3	17768	17186	0		18.7373
13761	Regions/clus3	18488	17186	0		13.8361
13762	Regions/clus3	18568	17186	0		19.318
13763	Regions/clus3	18648	17186	0		18.7247
13764	Regions/clus3	18728	17186	0		22.1816
13765	Regions/clus3	18808	17186	0		17.7306
13766	Regions/clus3	18888	17186	0		10.9713
13767	Regions/clus3	18968	17186	0		23.1539
13768	Regions/clus3	19048	17186	0		24.3468
13769	Regions/clus3	19128	17186	0		18.2016
13774	Regions/clus3	19528	17186	0		13.7353
13775	Regions/clus3	19608	17186	0		19.0771
13776	Regions/clus3	19688	17186	0		13.2663
13777	Regions/clus3	19768	17186	0		12.5898
13778	Regions/clus3	19848	17186	0		17.4471
13779	Regions/clus3	19928	17186	0		18.0324
13781	Regions/clus3	14568	17106	0		10.0448
13784	Regions/clus3	14808	17106	0		12.161
13785	Regions/clus3	14888	17106	0		14.748
13786	Regions/clus3	14968	17106	0		15.0735
13787	Regions/clus3	15048	17106	0		16.3198
13788	Regions/clus3	15128	17106	0		16.2286
13789	Regions/clus3	15208	17106	0		13.5681
13790	Regions/clus3	15288	17106	0		10.7061
13791	Regions/clus3	15368	17106	0		14.0969
13792	Regions/clus3	15448	17106	0		13.5696
13793	Regions/clus3	15528	17106	0		16.5992
[truncated: 4,550 more rows]

## Sheet: Figure S7D
spotId	raster	x	y	z	Date	N-Acetylaspartate/Aspartate
289	Regions/clus4	4328	15826	0		8.01904
360	Regions/clus4	4088	15746	0		7.23749
361	Regions/clus4	4168	15746	0		6.90554
362	Regions/clus4	4248	15746	0		7.85617
363	Regions/clus4	4328	15746	0		7.98997
364	Regions/clus4	4408	15746	0		8.58303
378	Regions/clus4	5528	15746	0		7.20431
379	Regions/clus4	5608	15746	0		7.78988
435	Regions/clus4	3928	15666	0		8.43813
436	Regions/clus4	4008	15666	0		7.41503
440	Regions/clus4	4328	15666	0		8.18022
441	Regions/clus4	4408	15666	0		7.26943
453	Regions/clus4	5368	15666	0		9.19478
454	Regions/clus4	5448	15666	0		7.33055
456	Regions/clus4	5608	15666	0		8.15611
457	Regions/clus4	5688	15666	0		7.86423
505	Regions/clus4	3208	15586	0		8.31702
513	Regions/clus4	3848	15586	0		7.4849
515	Regions/clus4	4008	15586	0		7.58934
520	Regions/clus4	4408	15586	0		8.62903
531	Regions/clus4	5288	15586	0		7.49765
537	Regions/clus4	5768	15586	0		8.26873
586	Regions/clus4	3208	15506	0		7.47316
588	Regions/clus4	3368	15506	0		7.73943
589	Regions/clus4	3448	15506	0		7.89293
600	Regions/clus4	4328	15506	0		7.78613
612	Regions/clus4	5288	15506	0		7.30639
613	Regions/clus4	5368	15506	0		8.55562
614	Regions/clus4	5448	15506	0		8.43654
620	Regions/clus4	5928	15506	0		7.72185
622	Regions/clus4	6088	15506	0		7.88297
666	Regions/clus4	2888	15426	0		10.4651
667	Regions/clus4	2968	15426	0		10.9096
668	Regions/clus4	3048	15426	0		10.0579
684	Regions/clus4	4328	15426	0		7.7537
685	Regions/clus4	4408	15426	0		8.94181
695	Regions/clus4	5208	15426	0		6.66227
696	Regions/clus4	5288	15426	0		8.48434
697	Regions/clus4	5368	15426	0		9.02915
705	Regions/clus4	6008	15426	0		8.27257
706	Regions/clus4	6088	15426	0		7.53969
707	Regions/clus4	6168	15426	0		9.60993
708	Regions/clus4	6248	15426	0		9.19104
747	Regions/clus4	2408	15346	0		9.38303
748	Regions/clus4	2488	15346	0		8.37618
749	Regions/clus4	2568	15346	0		10.3892
771	Regions/clus4	4328	15346	0		8.86529
772	Regions/clus4	4408	15346	0		7.42236
773	Regions/clus4	4488	15346	0		8.27798
780	Regions/clus4	5048	15346	0		7.90856
782	Regions/clus4	5208	15346	0		9.07124
783	Regions/clus4	5288	15346	0		8.88578
794	Regions/clus4	6168	15346	0		10.4707
796	Regions/clus4	6328	15346	0		8.58279
798	Regions/clus4	6488	15346	0		10.6359
838	Regions/clus4	2568	15266	0		9.64985
839	Regions/clus4	2648	15266	0		10.3972
861	Regions/clus4	4408	15266	0		7.32755
862	Regions/clus4	4488	15266	0		10.2601
885	Regions/clus4	6328	15266	0		10.537
886	Regions/clus4	6408	15266	0		11.3513
891	Regions/clus4	6808	15266	0		9.10387
923	Regions/clus4	2088	15186	0		7.23904
925	Regions/clus4	2248	15186	0		7.19873
926	Regions/clus4	2328	15186	0		7.85524
954	Regions/clus4	4568	15186	0		9.96977
955	Regions/clus4	4648	15186	0		7.8133
956	Regions/clus4	4728	15186	0		10.1363
957	Regions/clus4	4808	15186	0		9.08464
960	Regions/clus4	5048	15186	0		7.93895
980	Regions/clus4	6648	15186	0		11.8801
983	Regions/clus4	6888	15186	0		8.08447
1015	Regions/clus4	2008	15106	0		9.87713
1016	Regions/clus4	2088	15106	0		7.9864
1017	Regions/clus4	2168	15106	0		8.15748
1034	Regions/clus4	3528	15106	0		10.9812
1035	Regions/clus4	3608	15106	0		9.70455
1036	Regions/clus4	3688	15106	0		11.9701
1037	Regions/clus4	3768	15106	0		12.2349
1038	Regions/clus4	3848	15106	0		11.9814
1039	Regions/clus4	3928	15106	0		11.5437
1040	Regions/clus4	4008	15106	0		10.4268
1076	Regions/clus4	6888	15106	0		9.00859
1077	Regions/clus4	6968	15106	0		9.29098
1079	Regions/clus4	7128	15106	0		9.40123
1080	Regions/clus4	7208	15106	0		8.65877
1081	Regions/clus4	7288	15106	0		8.12799
1106	Regions/clus4	1608	15026	0		7.31954
1110	Regions/clus4	1928	15026	0		7.16473
1111	Regions/clus4	2008	15026	0		6.93987
1112	Regions/clus4	2088	15026	0		7.49073
1126	Regions/clus4	3208	15026	0		9.41263
1127	Regions/clus4	3288	15026	0		13.2184
1128	Regions/clus4	3368	15026	0		25.4068
1129	Regions/clus4	3448	15026	0		14.6548
1130	Regions/clus4	3528	15026	0		11.4947
1132	Regions/clus4	3688	15026	0		13.2607
1133	Regions/clus4	3768	15026	0		18.0151
1136	Regions/clus4	4008	15026	0		18.4521
1138	Regions/clus4	4168	15026	0		19.8174
1174	Regions/clus4	7048	15026	0		9.31943
1175	Regions/clus4	7128	15026	0		8.22043
1176	Regions/clus4	7208	15026	0		8.23411
1177	Regions/clus4	7288	15026	0		7.32333
1209	Regions/clus4	1928	14946	0		7.25391
1225	Regions/clus4	3208	14946	0		10.8922
1226	Regions/clus4	3288	14946	0		9.39642
1227	Regions/clus4	3368	14946	0		10.3903
1228	Regions/clus4	3448	14946	0		10.8457
1229	Regions/clus4	3528	14946	0		12.7508
1232	Regions/clus4	3768	14946	0		21.9575
1236	Regions/clus4	4088	14946	0		14.7152
1237	Regions/clus4	4168	14946	0		14.5651
1238	Regions/clus4	4248	14946	0		10.3535
1239	Regions/clus4	4328	14946	0		12.0164
1240	Regions/clus4	4408	14946	0		8.38546
1241	Regions/clus4	4488	14946	0		9.90767
1250	Regions/clus4	5208	14946	0		8.80264
1251	Regions/clus4	5288	14946	0		7.14316
1275	Regions/clus4	7208	14946	0		8.6791
1276	Regions/clus4	7288	14946	0		10.3653
1308	Regions/clus4	1848	14866	0		7.29777
1324	Regions/clus4	3128	14866	0		13.4706
1325	Regions/clus4	3208	14866	0		11.9564
1326	Regions/clus4	3288	14866	0		9.35496
1327	Regions/clus4	3368	14866	0		8.29368
1328	Regions/clus4	3448	14866	0		9.12305
1333	Regions/clus4	3848	14866	0		13.9502
1334	Regions/clus4	3928	14866	0		13.5037
1335	Regions/clus4	4008	14866	0		15.5016
1336	Regions/clus4	4088	14866	0		14.1248
1338	Regions/clus4	4248	14866	0		9.46677
1339	Regions/clus4	4328	14866	0		10.1782
1340	Regions/clus4	4408	14866	0		10.7359
1341	Regions/clus4	4488	14866	0		8.90424
1342	Regions/clus4	4568	14866	0		9.32074
1349	Regions/clus4	5128	14866	0		7.0923
1350	Regions/clus4	5208	14866	0		7.2049
1354	Regions/clus4	5528	14866	0		8.46377
1377	Regions/clus4	7368	14866	0		8.80105
1378	Regions/clus4	7448	14866	0		7.48285
1379	Regions/clus4	7528	14866	0		7.61547
1408	Regions/clus4	1608	14786	0		6.80868
1410	Regions/clus4	1768	14786	0		8.44076
1428	Regions/clus4	3208	14786	0		14.833
1429	Regions/clus4	3288	14786	0		16.0062
1430	Regions/clus4	3368	14786	0		13.0117
1431	Regions/clus4	3448	14786	0		13.7526
1433	Regions/clus4	3608	14786	0		18.7076
1435	Regions/clus4	3768	14786	0		17.4724
1436	Regions/clus4	3848	14786	0		10.9918
1437	Regions/clus4	3928	14786	0		9.01606
1440	Regions/clus4	4168	14786	0		9.62064
1442	Regions/clus4	4328	14786	0		9.6395
1445	Regions/clus4	4568	14786	0		8.37133
1446	Regions/clus4	4648	14786	0		8.66757
1447	Regions/clus4	4728	14786	0		8.34902
1449	Regions/clus4	4888	14786	0		7.77898
1450	Regions/clus4	4968	14786	0		6.86301
1453	Regions/clus4	5208	14786	0		8.16882
1455	Regions/clus4	5368	14786	0		8.28692
1457	Regions/clus4	5528	14786	0		7.08305
1481	Regions/clus4	7448	14786	0		9.00444
1482	Regions/clus4	7528	14786	0		9.35251
1483	Regions/clus4	7608	14786	0		8.53937
1484	Regions/clus4	7688	14786	0		8.91029
1485	Regions/clus4	7768	14786	0		8.76865
1509	Regions/clus4	1288	14706	0		7.11427
1510	Regions/clus4	1368	14706	0		8.40792
1511	Regions/clus4	1448	14706	0		7.1933
1513	Regions/clus4	1608	14706	0		8.22552
1514	Regions/clus4	1688	14706	0		7.06431
1534	Regions/clus4	3288	14706	0		15.7653
1537	Regions/clus4	3528	14706	0		19.635
1538	Regions/clus4	3608	14706	0		19.7806
1539	Regions/clus4	3688	14706	0		18.4823
1540	Regions/clus4	3768	14706	0		12.9284
1542	Regions/clus4	3928	14706	0		8.43726
1543	Regions/clus4	4008	14706	0		10.3901
1546	Regions/clus4	4248	14706	0		9.41515
1548	Regions/clus4	4408	14706	0		8.29426
1549	Regions/clus4	4488	14706	0		8.46226
1550	Regions/clus4	4568	14706	0		9.39614
1553	Regions/clus4	4808	14706	0		7.20136
1554	Regions/clus4	4888	14706	0		8.08789
1556	Regions/clus4	5048	14706	0		7.16144
1557	Regions/clus4	5128	14706	0		8.26456
1558	Regions/clus4	5208	14706	0		7.04958
1559	Regions/clus4	5288	14706	0		6.81483
1591	Regions/clus4	7848	14706	0		7.93622
1592	Regions/clus4	7928	14706	0		7.86993
1593	Regions/clus4	8008	14706	0		7.99318
1611	Regions/clus4	968	14626	0		11.1859
1617	Regions/clus4	1448	14626	0		7.10362
1618	Regions/clus4	1528	14626	0		7.00779
1619	Regions/clus4	1608	14626	0		7.39795
1642	Regions/clus4	3448	14626	0		22.8005
1643	Regions/clus4	3528	14626	0		16.7955
1644	Regions/clus4	3608	14626	0		16.639
1645	Regions/clus4	3688	14626	0		11.9478
1646	Regions/clus4	3768	14626	0		10.2444
1650	Regions/clus4	4088	14626	0		8.90186
1663	Regions/clus4	5128	14626	0		7.47626
1664	Regions/clus4	5208	14626	0		7.73136
1666	Regions/clus4	5368	14626	0		7.84821
1698	Regions/clus4	7928	14626	0		7.67029
1699	Regions/clus4	8008	14626	0		7.91271
1700	Regions/clus4	8088	14626	0		6.9162
1722	Regions/clus4	1368	14546	0		8.22814
1723	Regions/clus4	1448	14546	0		7.26293
1755	Regions/clus4	4008	14546	0		9.52574
1756	Regions/clus4	4088	14546	0		9.0224
1757	Regions/clus4	4168	14546	0		8.35902
1771	Regions/clus4	5288	14546	0		6.91413
1772	Regions/clus4	5368	14546	0		7.06659
1804	Regions/clus4	7928	14546	0		7.99316
1805	Regions/clus4	8008	14546	0		8.25019
1807	Regions/clus4	8168	14546	0		6.61977
1830	Regions/clus4	1368	14466	0		8.07503
1861	Regions/clus4	3848	14466	0		8.51607
1863	Regions/clus4	4008	14466	0		8.10349
1864	Regions/clus4	4088	14466	0		8.67757
1865	Regions/clus4	4168	14466	0		9.35555
1866	Regions/clus4	4248	14466	0		9.49497
1873	Regions/clus4	4808	14466	0		9.06268
1880	Regions/clus4	5368	14466	0		6.10386
1882	Regions/clus4	5528	14466	0		6.91083
1914	Regions/clus4	8088	14466	0		8.21071
1915	Regions/clus4	8168	14466	0		6.56579
1917	Regions/clus4	8328	14466	0		7.07679
1938	Regions/clus4	1288	14386	0		7.81304
1939	Regions/clus4	1368	14386	0		6.5317
1966	Regions/clus4	3528	14386	0		9.29983
1967	Regions/clus4	3608	14386	0		9.82293
1968	Regions/clus4	3688	14386	0		9.72859
1989	Regions/clus4	5368	14386	0		6.25078
2023	Regions/clus4	8088	14386	0		7.33239
2025	Regions/clus4	8248	14386	0		5.92217
2027	Regions/clus4	8408	14386	0		7.34253
2076	Regions/clus4	3528	14306	0		9.80451
2078	Regions/clus4	3688	14306	0		9.87035
2079	Regions/clus4	3768	14306	0		8.75689
2080	Regions/clus4	3848	14306	0		9.86935
2081	Regions/clus4	3928	14306	0		9.46457
2082	Regions/clus4	4008	14306	0		8.72657
2087	Regions/clus4	4408	14306	0		7.16454
2137	Regions/clus4	8408	14306	0		7.98693
2157	Regions/clus4	1128	14226	0		8.33332
2187	Regions/clus4	3528	14226	0		9.02224
2188	Regions/clus4	3608	14226	0		9.83551
2189	Regions/clus4	3688	14226	0		9.01259
2190	Regions/clus4	3768	14226	0		7.67655
2191	Regions/clus4	3848	14226	0		7.65273
2192	Regions/clus4	3928	14226	0		9.01261
2194	Regions/clus4	4088	14226	0		6.99025
2195	Regions/clus4	4168	14226	0		6.49645
2199	Regions/clus4	4488	14226	0		6.95852
2214	Regions/clus4	5688	14226	0		7.2563
2246	Regions/clus4	8248	14226	0		6.7315
2247	Regions/clus4	8328	14226	0		6.2804
2248	Regions/clus4	8408	14226	0		7.62728
2267	Regions/clus4	1048	14146	0		9.29681
2268	Regions/clus4	1128	14146	0		9.76672
2269	Regions/clus4	1208	14146	0		6.97962
2298	Regions/clus4	3528	14146	0		8.10046
2300	Regions/clus4	3688	14146	0		7.90611
2301	Regions/clus4	3768	14146	0		8.37762
2302	Regions/clus4	3848	14146	0		7.88298
2303	Regions/clus4	3928	14146	0		7.83822
2304	Regions/clus4	4008	14146	0		7.48152
2312	Regions/clus4	4648	14146	0		6.10944
2323	Regions/clus4	5528	14146	0		6.68388
2327	Regions/clus4	5848	14146	0		7.7641
2358	Regions/clus4	8328	14146	0		6.82924
2359	Regions/clus4	8408	14146	0		6.31445
2360	Regions/clus4	8488	14146	0		6.46872
2378	Regions/clus4	888	14066	0		5.5725
2381	Regions/clus4	1128	14066	0		7.86423
2412	Regions/clus4	3608	14066	0		8.78911
2413	Regions/clus4	3688	14066	0		7.3911
2415	Regions/clus4	3848	14066	0		7.57093
2424	Regions/clus4	4568	14066	0		6.32278
2436	Regions/clus4	5528	14066	0		6.64459
2439	Regions/clus4	5768	14066	0		9.66711
2473	Regions/clus4	8488	14066	0		7.84848
2474	Regions/clus4	8568	14066	0		7.60806
2526	Regions/clus4	3688	13986	0		6.72771
2527	Regions/clus4	3768	13986	0		6.33989
2529	Regions/clus4	3928	13986	0		7.47773
2543	Regions/clus4	5048	13986	0		5.28348
2548	Regions/clus4	5448	13986	0		7.09304
2551	Regions/clus4	5688	13986	0		6.09455
2554	Regions/clus4	5928	13986	0		9.49117
2587	Regions/clus4	8568	13986	0		7.0411
2588	Regions/clus4	8648	13986	0		7.8999
2605	Regions/clus4	888	13906	0		5.21254
2607	Regions/clus4	1048	13906	0		7.74315
2637	Regions/clus4	3448	13906	0		8.92342
2643	Regions/clus4	3928	13906	0		8.14272
2645	Regions/clus4	4088	13906	0		5.7513
2648	Regions/clus4	4328	13906	0		7.60993
2649	Regions/clus4	4408	13906	0		7.11808
2657	Regions/clus4	5048	13906	0		6.02568
2659	Regions/clus4	5208	13906	0		5.87589
2664	Regions/clus4	5608	13906	0		6.32498
2665	Regions/clus4	5688	13906	0		7.55167
2701	Regions/clus4	8568	13906	0		6.90848
2702	Regions/clus4	8648	13906	0		7.29995
2762	Regions/clus4	4248	13826	0		7.83668
2771	Regions/clus4	4968	13826	0		6.33444
2772	Regions/clus4	5048	13826	0		7.41176
2773	Regions/clus4	5128	13826	0		5.77973
2774	Regions/clus4	5208	13826	0		6.38626
2776	Regions/clus4	5368	13826	0		6.47939
2780	Regions/clus4	5688	13826	0		6.81952
2811	Regions/clus4	8168	13826	0		6.59583
2816	Regions/clus4	8568	13826	0		7.3866
2817	Regions/clus4	8648	13826	0		7.25802
2866	Regions/clus4	3368	13746	0		8.59413
2880	Regions/clus4	4488	13746	0		6.04027
2887	Regions/clus4	5048	13746	0		6.1763
2889	Regions/clus4	5208	13746	0		6.15897
2892	Regions/clus4	5448	13746	0		6.47094
2931	Regions/clus4	8568	13746	0		6.19811
2932	Regions/clus4	8648	13746	0		6.70284
2933	Regions/clus4	8728	13746	0		8.25727
2934	Regions/clus4	8808	13746	0		8.41458
2982	Regions/clus4	3288	13666	0		7.76113
2985	Regions/clus4	3528	13666	0		7.14433
2989	Regions/clus4	3848	13666	0		7.064
2996	Regions/clus4	4408	13666	0		6.21257
2997	Regions/clus4	4488	13666	0		6.31235
2998	Regions/clus4	4568	13666	0		6.20878
3002	Regions/clus4	4888	13666	0		8.57766
3005	Regions/clus4	5128	13666	0		5.43751
3006	Regions/clus4	5208	13666	0		7.25764
3048	Regions/clus4	8568	13666	0		6.48686
3049	Regions/clus4	8648	13666	0		7.03115
3050	Regions/clus4	8728	13666	0		7.62219
3100	Regions/clus4	3368	13586	0		7.58175
3103	Regions/clus4	3608	13586	0		9.19075
3105	Regions/clus4	3768	13586	0		8.19816
3116	Regions/clus4	4648	13586	0		6.67094
3166	Regions/clus4	8648	13586	0		7.56873
3167	Regions/clus4	8728	13586	0		7.45739
3219	Regions/clus4	3528	13506	0		7.70915
3220	Regions/clus4	3608	13506	0		9.22797
3222	Regions/clus4	3768	13506	0		8.10887
3241	Regions/clus4	5288	13506	0		6.66186
3283	Regions/clus4	8648	13506	0		6.46916
3284	Regions/clus4	8728	13506	0		7.04922
3285	Regions/clus4	8808	13506	0		7.62925
3353	Regions/clus4	4808	13426	0		5.91579
3354	Regions/clus4	4888	13426	0		6.6496
3401	Regions/clus4	8648	13426	0		6.80386
3402	Regions/clus4	8728	13426	0		7.42719
3459	Regions/clus4	3848	13346	0		6.75827
3467	Regions/clus4	4488	13346	0		6.42649
3469	Regions/clus4	4648	13346	0		7.68084
3520	Regions/clus4	8728	13346	0		6.21312
3521	Regions/clus4	8808	13346	0		6.6524
3575	Regions/clus4	3608	13266	0		6.79586
3577	Regions/clus4	3768	13266	0		7.85873
3578	Regions/clus4	3848	13266	0		7.19331
3587	Regions/clus4	4568	13266	0		6.92215
3589	Regions/clus4	4728	13266	0		7.03088
3591	Regions/clus4	4888	13266	0		6.47109
3638	Regions/clus4	8648	13266	0		6.48959
3640	Regions/clus4	8808	13266	0		6.52421
3696	Regions/clus4	3688	13186	0		6.98564
3705	Regions/clus4	4408	13186	0		6.54653
3710	Regions/clus4	4808	13186	0		7.41836
3823	Regions/clus4	4248	13106	0		7.90676
3830	Regions/clus4	4808	13106	0		6.07874
3876	Regions/clus4	8488	13106	0		6.65585
3879	Regions/clus4	8728	13106	0		6.20645
3901	Regions/clus4	888	13026	0		5.91315
3938	Regions/clus4	3848	13026	0		8.42579
3949	Regions/clus4	4728	13026	0		6.6455
3954	Regions/clus4	5128	13026	0		6.71573
3995	Regions/clus4	8408	13026	0		6.65725
3996	Regions/clus4	8488	13026	0		5.92865
3999	Regions/clus4	8728	13026	0		6.29476
4055	Regions/clus4	3688	12946	0		7.03156
4063	Regions/clus4	4328	12946	0		6.65432
4065	Regions/clus4	4488	12946	0		7.25918
4067	Regions/clus4	4648	12946	0		6.44481
4069	Regions/clus4	4808	12946	0		7.18239
4073	Regions/clus4	5128	12946	0		6.1679
4174	Regions/clus4	3688	12866	0		6.34822
4180	Regions/clus4	4168	12866	0		7.61969
4183	Regions/clus4	4408	12866	0		7.51022
4184	Regions/clus4	4488	12866	0		8.42324
4185	Regions/clus4	4568	12866	0		7.48905
4186	Regions/clus4	4648	12866	0		7.19861
4189	Regions/clus4	4888	12866	0		6.43936
4190	Regions/clus4	4968	12866	0		6.8775
4191	Regions/clus4	5048	12866	0		6.91991
4192	Regions/clus4	5128	12866	0		6.22535
4299	Regions/clus4	4168	12786	0		6.5539
4301	Regions/clus4	4328	12786	0		7.06212
4303	Regions/clus4	4488	12786	0		6.47046
4308	Regions/clus4	4888	12786	0		5.94507
4309	Regions/clus4	4968	12786	0		7.40712
4311	Regions/clus4	5128	12786	0		7.64129
4312	Regions/clus4	5208	12786	0		6.82438
4313	Regions/clus4	5288	12786	0		6.85377
4419	Regions/clus4	4248	12706	0		6.94751
4420	Regions/clus4	4328	12706	0		6.5957
4421	Regions/clus4	4408	12706	0		6.15219
4424	Regions/clus4	4648	12706	0		6.79562
4425	Regions/clus4	4728	12706	0		6.41576
4429	Regions/clus4	5048	12706	0		6.45147
4539	Regions/clus4	4248	12626	0		5.92832
4540	Regions/clus4	4328	12626	0		7.66774
4542	Regions/clus4	4488	12626	0		6.88465
4548	Regions/clus4	4968	12626	0		6.5185
4549	Regions/clus4	5048	12626	0		7.76632
4550	Regions/clus4	5128	12626	0		6.27882
4551	Regions/clus4	5208	12626	0		6.61712
4553	Regions/clus4	5368	12626	0		6.62608
4587	Regions/clus4	8088	12626	0		6.23396
4658	Regions/clus4	4248	12546	0		6.27921
4659	Regions/clus4	4328	12546	0		6.77844
4660	Regions/clus4	4408	12546	0		7.21892
4661	Regions/clus4	4488	12546	0		6.34467
4667	Regions/clus4	4968	12546	0		6.54211
4669	Regions/clus4	5128	12546	0		5.93518
4701	Regions/clus4	7688	12546	0		7.39668
4776	Regions/clus4	4168	12466	0		6.03093
4778	Regions/clus4	4328	12466	0		6.68542
4781	Regions/clus4	4568	12466	0		6.32825
4787	Regions/clus4	5048	12466	0		5.7866
4788	Regions/clus4	5128	12466	0		6.75505
4897	Regions/clus4	4328	12386	0		6.41935
4898	Regions/clus4	4408	12386	0		6.06464
4899	Regions/clus4	4488	12386	0		5.84535
4903	Regions/clus4	4808	12386	0		6.64772
4904	Regions/clus4	4888	12386	0		5.66514
4905	Regions/clus4	4968	12386	0		6.03742
4906	Regions/clus4	5048	12386	0		5.6269
4907	Regions/clus4	5128	12386	0		5.83844
5015	Regions/clus4	4328	12306	0		5.93457
5016	Regions/clus4	4408	12306	0		6.06397
5017	Regions/clus4	4488	12306	0		6.34107
5022	Regions/clus4	4888	12306	0		7.06442
5023	Regions/clus4	4968	12306	0		6.34954
5024	Regions/clus4	5048	12306	0		6.07051
5025	Regions/clus4	5128	12306	0		6.58414
5133	Regions/clus4	4328	12226	0		5.50988
5134	Regions/clus4	4408	12226	0		6.46506
5140	Regions/clus4	4888	12226	0		5.76396
5141	Regions/clus4	4968	12226	0		6.15414
5142	Regions/clus4	5048	12226	0		6.88458
5143	Regions/clus4	5128	12226	0		6.84781
5144	Regions/clus4	5208	12226	0		6.27577
5145	Regions/clus4	5288	12226	0		6.04984
5146	Regions/clus4	5368	12226	0		5.86822
5147	Regions/clus4	5448	12226	0		5.75852
5148	Regions/clus4	5528	12226	0		5.45633
5183	Regions/clus4	8328	12226	0		6.98604
5245	Regions/clus4	4008	12146	0		7.10357
5248	Regions/clus4	4248	12146	0		5.47291
5249	Regions/clus4	4328	12146	0		5.61057
5250	Regions/clus4	4408	12146	0		5.5302
5252	Regions/clus4	4568	12146	0		6.00583
5256	Regions/clus4	4888	12146	0		6.04571
5257	Regions/clus4	4968	12146	0		6.07885
5258	Regions/clus4	5048	12146	0		6.13495
5259	Regions/clus4	5128	12146	0		7.14562
5260	Regions/clus4	5208	12146	0		5.61608
5261	Regions/clus4	5288	12146	0		6.29713
5263	Regions/clus4	5448	12146	0		6.28404
5283	Regions/clus4	7048	12146	0		5.49211
5362	Regions/clus4	4088	12066	0		5.8562
5363	Regions/clus4	4168	12066	0		5.52798
5364	Regions/clus4	4248	12066	0		6.06641
5365	Regions/clus4	4328	12066	0		5.61302
5367	Regions/clus4	4488	12066	0		6.11794
5373	Regions/clus4	4968	12066	0		5.66468
5374	Regions/clus4	5048	12066	0		5.56588
5375	Regions/clus4	5128	12066	0		5.09953
5376	Regions/clus4	5208	12066	0		6.64582
5377	Regions/clus4	5288	12066	0		6.28532
5378	Regions/clus4	5368	12066	0		6.15935
5379	Regions/clus4	5448	12066	0		5.31488
5399	Regions/clus4	7048	12066	0		6.94897
5477	Regions/clus4	4088	11986	0		6.12423
5478	Regions/clus4	4168	11986	0		5.40055
5479	Regions/clus4	4248	11986	0		5.40288
5480	Regions/clus4	4328	11986	0		5.7521
5482	Regions/clus4	4488	11986	0		5.62952
5490	Regions/clus4	5128	11986	0		5.96564
5491	Regions/clus4	5208	11986	0		6.40178
5492	Regions/clus4	5288	11986	0		5.92348
5493	Regions/clus4	5368	11986	0		5.78165
5512	Regions/clus4	6888	11986	0		6.84407
5586	Regions/clus4	3608	11906	0		6.28283
5592	Regions/clus4	4088	11906	0		6.2941
5593	Regions/clus4	4168	11906	0		5.84489
5594	Regions/clus4	4248	11906	0		5.51488
5596	Regions/clus4	4408	11906	0		5.28371
5605	Regions/clus4	5128	11906	0		6.07428
5606	Regions/clus4	5208	11906	0		5.23304
5607	Regions/clus4	5288	11906	0		5.36345
5608	Regions/clus4	5368	11906	0		6.36179
5609	Regions/clus4	5448	11906	0		5.39865
5626	Regions/clus4	6808	11906	0		7.14198
5627	Regions/clus4	6888	11906	0		6.1236
5706	Regions/clus4	4088	11826	0		6.12495
5707	Regions/clus4	4168	11826	0		5.74023
5708	Regions/clus4	4248	11826	0		5.61129
5709	Regions/clus4	4328	11826	0		4.93083
5718	Regions/clus4	5048	11826	0		5.82031
5719	Regions/clus4	5128	11826	0		5.86113
5720	Regions/clus4	5208	11826	0		5.30102
5721	Regions/clus4	5288	11826	0		6.18821
5722	Regions/clus4	5368	11826	0		5.68688
5819	Regions/clus4	4088	11746	0		5.48942
5820	Regions/clus4	4168	11746	0		5.39516
5821	Regions/clus4	4248	11746	0		6.12221
5833	Regions/clus4	5208	11746	0		5.23378
5834	Regions/clus4	5288	11746	0		5.0257
5836	Regions/clus4	5448	11746	0		5.21551
5930	Regions/clus4	4008	11666	0		5.56411
5932	Regions/clus4	4168	11666	0		5.84302
5943	Regions/clus4	5048	11666	0		5.74607
5944	Regions/clus4	5128	11666	0		5.20508
5945	Regions/clus4	5208	11666	0		5.26103
5946	Regions/clus4	5288	11666	0		5.97395
5947	Regions/clus4	5368	11666	0		6.83933
5948	Regions/clus4	5448	11666	0		7.32325
5962	Regions/clus4	6568	11666	0		6.71772
6041	Regions/clus4	4008	11586	0		5.62461
6053	Regions/clus4	4968	11586	0		5.5208
6056	Regions/clus4	5208	11586	0		5.17899
6057	Regions/clus4	5288	11586	0		6.24935
6058	Regions/clus4	5368	11586	0		6.01751
6059	Regions/clus4	5448	11586	0		5.88984
6148	Regions/clus4	3848	11506	0		6.81569
6150	Regions/clus4	4008	11506	0		6.28512
6151	Regions/clus4	4088	11506	0		7.15763
6162	Regions/clus4	4968	11506	0		5.03943
6163	Regions/clus4	5048	11506	0		5.28603
6164	Regions/clus4	5128	11506	0		5.16592
6165	Regions/clus4	5208	11506	0		6.09279
6166	Regions/clus4	5288	11506	0		6.03547
6167	Regions/clus4	5368	11506	0		6.61576
6252	Regions/clus4	3688	11426	0		6.67717
6256	Regions/clus4	4008	11426	0		6.80302
6271	Regions/clus4	5208	11426	0		5.64733
6272	Regions/clus4	5288	11426	0		5.58813
6273	Regions/clus4	5368	11426	0		5.52542
6274	Regions/clus4	5448	11426	0		6.23358
6350	Regions/clus4	3448	11346	0		5.64335
6351	Regions/clus4	3528	11346	0		6.40835
6357	Regions/clus4	4008	11346	0		5.6035
6372	Regions/clus4	5208	11346	0		7.69117
6373	Regions/clus4	5288	11346	0		6.38838
6374	Regions/clus4	5368	11346	0		6.52448
6375	Regions/clus4	5448	11346	0		5.90452
6447	Regions/clus4	3448	11266	0		7.69331
6448	Regions/clus4	3528	11266	0		6.12751
6452	Regions/clus4	3848	11266	0		5.71759
6453	Regions/clus4	3928	11266	0		5.8771
6471	Regions/clus4	5368	11266	0		7.09749
6472	Regions/clus4	5448	11266	0		6.68056
6473	Regions/clus4	5528	11266	0		6.44519
6475	Regions/clus4	5688	11266	0		6.46447
6480	Regions/clus4	6088	11266	0		6.99132
6540	Regions/clus4	3448	11186	0		9.24166
6542	Regions/clus4	3608	11186	0		6.44707
6544	Regions/clus4	3768	11186	0		6.34071
6567	Regions/clus4	5608	11186	0		8.58609
6568	Regions/clus4	5688	11186	0		8.7285
6569	Regions/clus4	5768	11186	0		9.42539
6571	Regions/clus4	5928	11186	0		9.44881
6572	Regions/clus4	6008	11186	0		9.1782
6658	Regions/clus4	5848	11106	0		20.7632
6660	Regions/clus4	6008	11106	0		14.6566
7220	Regions/clus4	28568	16306	0		12.7134
7281	Regions/clus4	28568	16226	0		12.8455
7282	Regions/clus4	28648	16226	0		14.2393
7339	Regions/clus4	28088	16146	0		12.6926
7340	Regions/clus4	28168	16146	0		12.8033
7341	Regions/clus4	28248	16146	0		13.5524
7342	Regions/clus4	28328	16146	0		14.8114
7344	Regions/clus4	28488	16146	0		13.4184
7347	Regions/clus4	28728	16146	0		13.5573
7402	Regions/clus4	27688	16066	0		11.0557
7405	Regions/clus4	27928	16066	0		13.1389
7406	Regions/clus4	28008	16066	0		11.1561
7409	Regions/clus4	28248	16066	0		13.3817
7415	Regions/clus4	28728	16066	0		14.7319
7416	Regions/clus4	28808	16066	0		13.1732
7469	Regions/clus4	27448	15986	0		11.4754
7471	Regions/clus4	27608	15986	0		12.3626
7472	Regions/clus4	27688	15986	0		12.5877
7473	Regions/clus4	27768	15986	0		10.8634
7474	Regions/clus4	27848	15986	0		11.5902
7485	Regions/clus4	28728	15986	0		14.1555
7486	Regions/clus4	28808	15986	0		10.9944
7492	Regions/clus4	30888	15986	0		14.4673
7494	Regions/clus4	31048	15986	0		15.2151
7540	Regions/clus4	27288	15906	0		11.0146
7541	Regions/clus4	27368	15906	0		13.0422
7542	Regions/clus4	27448	15906	0		11.7493
7543	Regions/clus4	27528	15906	0		12.1066
7545	Regions/clus4	27688	15906	0		12.0829
7566	Regions/clus4	30888	15906	0		13.8465
7567	Regions/clus4	30968	15906	0		12.9477
7568	Regions/clus4	31048	15906	0		11.58
7569	Regions/clus4	31128	15906	0		12.2723
7614	Regions/clus4	27048	15826	0		11.37
7615	Regions/clus4	27128	15826	0		11.3506
7616	Regions/clus4	27208	15826	0		12.1849
7618	Regions/clus4	27368	15826	0		9.86345
7638	Regions/clus4	28968	15826	0		13.5395
7642	Regions/clus4	29288	15826	0		8.91532
7648	Regions/clus4	31048	15826	0		13.4102
7649	Regions/clus4	31128	15826	0		11.6911
7650	Regions/clus4	31208	15826	0		11.5854
7651	Regions/clus4	31288	15826	0		12.3054
7652	Regions/clus4	31368	15826	0		13.3485
7653	Regions/clus4	31448	15826	0		13.0375
7656	Regions/clus4	31688	15826	0		10.2649
7693	Regions/clus4	26808	15746	0		8.78049
7694	Regions/clus4	26888	15746	0		10.4064
7695	Regions/clus4	26968	15746	0		11.3598
7696	Regions/clus4	27048	15746	0		10.4651
7720	Regions/clus4	28968	15746	0		13.7705
7724	Regions/clus4	29288	15746	0		9.64456
7725	Regions/clus4	29368	15746	0		14.2389
7726	Regions/clus4	30408	15746	0		9.17922
7739	Regions/clus4	31448	15746	0		12.6103
7740	Regions/clus4	31528	15746	0		11.2426
7741	Regions/clus4	31608	15746	0		10.1354
7742	Regions/clus4	31688	15746	0		10.7411
7780	Regions/clus4	26728	15666	0		10.2908
7781	Regions/clus4	26808	15666	0		10.6765
7832	Regions/clus4	31688	15666	0		9.3783
7833	Regions/clus4	31768	15666	0		10.3843
7834	Regions/clus4	31848	15666	0		10.6058
7871	Regions/clus4	26648	15586	0		11.9105
7872	Regions/clus4	26728	15586	0		10.913
7931	Regions/clus4	31928	15586	0		9.57663
7932	Regions/clus4	32008	15586	0		9.05884
7967	Regions/clus4	26488	15506	0		9.76191
8034	Regions/clus4	32088	15506	0		8.93824
8035	Regions/clus4	32168	15506	0		9.13961
8039	Regions/clus4	32488	15506	0		8.4734
8140	Regions/clus4	32088	15426	0		8.8732
8141	Regions/clus4	32168	15426	0		8.71705
8142	Regions/clus4	32248	15426	0		8.94228
8144	Regions/clus4	32408	15426	0		9.46215
8145	Regions/clus4	32488	15426	0		7.54262
8176	Regions/clus4	26248	15346	0		11.6859
8177	Regions/clus4	26328	15346	0		10.42
8178	Regions/clus4	26408	15346	0		9.79255
8252	Regions/clus4	32328	15346	0		9.34627
8253	Regions/clus4	32408	15346	0		7.85082
8254	Regions/clus4	32488	15346	0		8.52097
8255	Regions/clus4	32568	15346	0		7.64437
8257	Regions/clus4	32728	15346	0		7.23633
8286	Regions/clus4	26168	15266	0		9.4339
8287	Regions/clus4	26248	15266	0		11.0046
8288	Regions/clus4	26328	15266	0		8.49143
8364	Regions/clus4	32408	15266	0		8.79766
8365	Regions/clus4	32488	15266	0		8.30033
8366	Regions/clus4	32568	15266	0		8.48423
8399	Regions/clus4	26168	15186	0		8.60431
8400	Regions/clus4	26248	15186	0		9.16661
8433	Regions/clus4	28888	15186	0		12.5481
8434	Regions/clus4	28968	15186	0		10.3246
8435	Regions/clus4	29048	15186	0		10.4225
8479	Regions/clus4	32568	15186	0		7.51559
8480	Regions/clus4	32648	15186	0		7.43004
8481	Regions/clus4	32728	15186	0		7.28587
8512	Regions/clus4	26088	15106	0		9.43072
8546	Regions/clus4	28808	15106	0		10.942
8547	Regions/clus4	28888	15106	0		10.1992
8549	Regions/clus4	29048	15106	0		10.6721
8592	Regions/clus4	32488	15106	0		8.71985
8593	Regions/clus4	32568	15106	0		6.40086
8594	Regions/clus4	32648	15106	0		7.89593
8596	Regions/clus4	32808	15106	0		7.66872
8623	Regions/clus4	25688	15026	0		10.3748
8625	Regions/clus4	25848	15026	0		9.37875
8626	Regions/clus4	25928	15026	0		9.98666
8660	Regions/clus4	28648	15026	0		10.57
8661	Regions/clus4	28728	15026	0		11.342
8662	Regions/clus4	28808	15026	0		10.009
8663	Regions/clus4	28888	15026	0		10.3942
8710	Regions/clus4	32648	15026	0		8.05018
8711	Regions/clus4	32728	15026	0		7.59994
8712	Regions/clus4	32808	15026	0		7.52795
8741	Regions/clus4	25768	14946	0		9.10754
8742	Regions/clus4	25848	14946	0		8.56159
8751	Regions/clus4	26568	14946	0		9.35528
8827	Regions/clus4	32648	14946	0		8.7491
8829	Regions/clus4	32808	14946	0		7.95272
8859	Regions/clus4	25768	14866	0		9.45168
8860	Regions/clus4	25848	14866	0		7.96592
8946	Regions/clus4	32728	14866	0		7.17163
8947	Regions/clus4	32808	14866	0		7.18475
8949	Regions/clus4	32968	14866	0		7.08292
8977	Regions/clus4	25768	14786	0		9.52833
8983	Regions/clus4	26248	14786	0		7.61815
9019	Regions/clus4	29128	14786	0		9.68773
9022	Regions/clus4	29368	14786	0		10.0832
9058	Regions/clus4	32248	14786	0		10.0161
9059	Regions/clus4	32328	14786	0		7.76481
9066	Regions/clus4	32888	14786	0		7.51606
9096	Regions/clus4	25768	14706	0		8.88822
9139	Regions/clus4	29208	14706	0		9.23038
9175	Regions/clus4	32088	14706	0		10.5366
9176	Regions/clus4	32168	14706	0		9.9463
9184	Regions/clus4	32808	14706	0		7.17427
9214	Regions/clus4	25688	14626	0		10.2487
9221	Regions/clus4	26248	14626	0		8.73203
9222	Regions/clus4	26328	14626	0		8.14808
9248	Regions/clus4	28408	14626	0		9.99968
9256	Regions/clus4	29048	14626	0		11.5911
9257	Regions/clus4	29128	14626	0		8.54687
9260	Regions/clus4	29368	14626	0		9.24029
9261	Regions/clus4	29448	14626	0		7.71057
9270	Regions/clus4	30168	14626	0		7.5413
9299	Regions/clus4	32488	14626	0		7.50365
9300	Regions/clus4	32568	14626	0		8.5235
9304	Regions/clus4	32888	14626	0		7.49727
9306	Regions/clus4	33048	14626	0		7.63823
9331	Regions/clus4	25528	14546	0		8.26708
9332	Regions/clus4	25608	14546	0		8.03119
9333	Regions/clus4	25688	14546	0		10.048
9339	Regions/clus4	26168	14546	0		8.6664
9373	Regions/clus4	28888	14546	0		10.5736
9374	Regions/clus4	28968	14546	0		10.0919
9380	Regions/clus4	29448	14546	0		9.0716
9381	Regions/clus4	29528	14546	0		8.63178
9382	Regions/clus4	29608	14546	0		8.19653
9387	Regions/clus4	30008	14546	0		8.36106
9388	Regions/clus4	30088	14546	0		7.37627
9417	Regions/clus4	32408	14546	0		10.0964
9419	Regions/clus4	32568	14546	0		8.22455
9424	Regions/clus4	32968	14546	0		7.83749
9425	Regions/clus4	33048	14546	0		7.22833
9450	Regions/clus4	25528	14466	0		7.4305
9451	Regions/clus4	25608	14466	0		8.11338
9457	Regions/clus4	26088	14466	0		8.32548
9459	Regions/clus4	26248	14466	0		8.4725
9485	Regions/clus4	28328	14466	0		11.7208
9494	Regions/clus4	29048	14466	0		10.5675
9503	Regions/clus4	29768	14466	0		7.89946
9506	Regions/clus4	30008	14466	0		8.39207
9536	Regions/clus4	32408	14466	0		9.31484
9538	Regions/clus4	32568	14466	0		9.22661
9543	Regions/clus4	32968	14466	0		7.49716
9544	Regions/clus4	33048	14466	0		8.76395
9570	Regions/clus4	25448	14386	0		9.68816
9571	Regions/clus4	25528	14386	0		7.3219
9572	Regions/clus4	25608	14386	0		8.90558
9576	Regions/clus4	25928	14386	0		7.92553
9577	Regions/clus4	26008	14386	0		8.97029
9579	Regions/clus4	26168	14386	0		8.92956
9606	Regions/clus4	28328	14386	0		8.05161
9607	Regions/clus4	28408	14386	0		10.4192
9608	Regions/clus4	28488	14386	0		10.0862
9614	Regions/clus4	28968	14386	0		10.8978
9615	Regions/clus4	29048	14386	0		8.91284
9621	Regions/clus4	29528	14386	0		8.53306
9622	Regions/clus4	29608	14386	0		8.45733
9623	Regions/clus4	29688	14386	0		8.22817
9626	Regions/clus4	29928	14386	0		7.54444
9627	Regions/clus4	30008	14386	0		8.74241
9628	Regions/clus4	30088	14386	0		8.116
9629	Regions/clus4	30168	14386	0		6.75595
9659	Regions/clus4	32568	14386	0		8.21144
9662	Regions/clus4	32808	14386	0		6.88949
9665	Regions/clus4	33048	14386	0		7.95879
9691	Regions/clus4	25448	14306	0		14.2648
9692	Regions/clus4	25528	14306	0		9.65004
9693	Regions/clus4	25608	14306	0		8.60233
9698	Regions/clus4	26008	14306	0		8.47445
9701	Regions/clus4	26248	14306	0		9.4647
9728	Regions/clus4	28408	14306	0		11.0753
9729	Regions/clus4	28488	14306	0		10.0772
9730	Regions/clus4	28568	14306	0		10.224
9732	Regions/clus4	28728	14306	0		8.85706
9733	Regions/clus4	28808	14306	0		9.25282
9734	Regions/clus4	28888	14306	0		10.0201
9735	Regions/clus4	28968	14306	0		10.2788
9748	Regions/clus4	30008	14306	0		8.25982
9749	Regions/clus4	30088	14306	0		9.40611
9774	Regions/clus4	32088	14306	0		9.37058
9780	Regions/clus4	32568	14306	0		8.40264
9786	Regions/clus4	33048	14306	0		7.40074
9810	Regions/clus4	25288	14226	0		10.9509
9811	Regions/clus4	25368	14226	0		8.65511
9812	Regions/clus4	25448	14226	0		9.44573
9813	Regions/clus4	25528	14226	0		10.0973
9816	Regions/clus4	25768	14226	0		10.838
9819	Regions/clus4	26008	14226	0		7.79934
9820	Regions/clus4	26088	14226	0		8.03043
9857	Regions/clus4	29048	14226	0		8.68745
9862	Regions/clus4	29448	14226	0		8.11177
9864	Regions/clus4	29608	14226	0		8.20904
9865	Regions/clus4	29688	14226	0		8.91719
9869	Regions/clus4	30008	14226	0		7.94748
9870	Regions/clus4	30088	14226	0		9.12922
9871	Regions/clus4	30168	14226	0		7.58954
9904	Regions/clus4	32808	14226	0		5.97829
9908	Regions/clus4	33128	14226	0		7.14647
9909	Regions/clus4	33208	14226	0		6.80939
9933	Regions/clus4	25368	14146	0		10.2368
9934	Regions/clus4	25448	14146	0		8.54759
9935	Regions/clus4	25528	14146	0		9.37762
9939	Regions/clus4	25848	14146	0		8.40915
9940	Regions/clus4	25928	14146	0		7.95877
9944	Regions/clus4	26248	14146	0		8.12205
9978	Regions/clus4	28968	14146	0		8.67579
9983	Regions/clus4	29368	14146	0		9.83786
9984	Regions/clus4	29448	14146	0		8.46804
10018	Regions/clus4	32168	14146	0		8.02393
10020	Regions/clus4	32328	14146	0		9.00118
10024	Regions/clus4	32648	14146	0		8.714
10027	Regions/clus4	32888	14146	0		6.32108
10029	Regions/clus4	33048	14146	0		6.94457
10030	Regions/clus4	33128	14146	0		6.9714
10031	Regions/clus4	33208	14146	0		6.67428
10053	Regions/clus4	25208	14066	0		7.24168
10055	Regions/clus4	25368	14066	0		9.92083
10060	Regions/clus4	25768	14066	0		8.33099
10105	Regions/clus4	29368	14066	0		7.72012
10144	Regions/clus4	32488	14066	0		8.49068
10147	Regions/clus4	32728	14066	0		7.31822
10151	Regions/clus4	33048	14066	0		6.77186
10152	Regions/clus4	33128	14066	0		6.86446
10181	Regions/clus4	25608	13986	0		8.22258
10187	Regions/clus4	26088	13986	0		8.33544
10228	Regions/clus4	29368	13986	0		7.59804
10264	Regions/clus4	32248	13986	0		9.38037
10269	Regions/clus4	32648	13986	0		7.36357
10304	Regions/clus4	25608	13906	0		6.46913
10306	Regions/clus4	25768	13906	0		7.5731
10309	Regions/clus4	26008	13906	0		9.77605
10343	Regions/clus4	28728	13906	0		11.0286
10356	Regions/clus4	29768	13906	0		9.51526
10396	Regions/clus4	32968	13906	0		6.38987
10425	Regions/clus4	25368	13826	0		7.29548
10428	Regions/clus4	25608	13826	0		7.89718
10430	Regions/clus4	25768	13826	0		9.15836
10435	Regions/clus4	26168	13826	0		8.78009
10467	Regions/clus4	28728	13826	0		10.395
10468	Regions/clus4	28808	13826	0		10.0034
10469	Regions/clus4	28888	13826	0		8.58669
10470	Regions/clus4	28968	13826	0		8.67778
10471	Regions/clus4	29048	13826	0		10.1928
10472	Regions/clus4	29128	13826	0		9.13471
10473	Regions/clus4	29208	13826	0		10.4914
10474	Regions/clus4	29288	13826	0		9.98442
10476	Regions/clus4	29448	13826	0		7.10665
10480	Regions/clus4	29768	13826	0		8.43854
10481	Regions/clus4	29848	13826	0		8.70715
10482	Regions/clus4	29928	13826	0		8.8639
10521	Regions/clus4	33048	13826	0		7.53052
10549	Regions/clus4	25368	13746	0		8.46828
10554	Regions/clus4	25768	13746	0		8.25013
10592	Regions/clus4	28808	13746	0		10.5263
10593	Regions/clus4	28888	13746	0		10.2084
10595	Regions/clus4	29048	13746	0		9.24894
10596	Regions/clus4	29128	13746	0		9.21384
10598	Regions/clus4	29288	13746	0		8.97032
10600	Regions/clus4	29448	13746	0		8.09851
10601	Regions/clus4	29528	13746	0		7.9377
10603	Regions/clus4	29688	13746	0		8.03821
10604	Regions/clus4	29768	13746	0		9.96397
10605	Regions/clus4	29848	13746	0		8.63915
10606	Regions/clus4	29928	13746	0		8.20171
10637	Regions/clus4	32408	13746	0		8.32217
10641	Regions/clus4	32728	13746	0		7.6342
10642	Regions/clus4	32808	13746	0		8.56721
10643	Regions/clus4	32888	13746	0		7.54396
10673	Regions/clus4	25448	13666	0		8.13651
10679	Regions/clus4	25928	13666	0		9.49371
10680	Regions/clus4	26008	13666	0		8.75928
10717	Regions/clus4	28968	13666	0		8.98238
10719	Regions/clus4	29128	13666	0		10.0329
10720	Regions/clus4	29208	13666	0		9.5591
10721	Regions/clus4	29288	13666	0		8.71676
10722	Regions/clus4	29368	13666	0		9.08875
10723	Regions/clus4	29448	13666	0		9.72275
10725	Regions/clus4	29608	13666	0		9.167
10727	Regions/clus4	29768	13666	0		8.78145
10728	Regions/clus4	29848	13666	0		7.16304
10729	Regions/clus4	29928	13666	0		8.48334
10760	Regions/clus4	32408	13666	0		7.67905
10800	Regions/clus4	25848	13586	0		8.04218
10841	Regions/clus4	29128	13586	0		9.51852
10842	Regions/clus4	29208	13586	0		7.98927
10920	Regions/clus4	25688	13506	0		8.99248
10921	Regions/clus4	25768	13506	0		9.1305
10922	Regions/clus4	25848	13506	0		10.8865
10926	Regions/clus4	26168	13506	0		9.34793
10973	Regions/clus4	29928	13506	0		8.91312
11003	Regions/clus4	32328	13506	0		8.271
11004	Regions/clus4	32408	13506	0		7.40568
11010	Regions/clus4	32888	13506	0		7.38864
11046	Regions/clus4	26088	13426	0		8.33757
11084	Regions/clus4	29128	13426	0		8.72077
11088	Regions/clus4	29448	13426	0		7.47459
11089	Regions/clus4	29528	13426	0		7.62029
11093	Regions/clus4	29848	13426	0		7.98316
11160	Regions/clus4	25608	13346	0		8.82647
11198	Regions/clus4	28648	13346	0		9.76844
11204	Regions/clus4	29128	13346	0		8.42506
11205	Regions/clus4	29208	13346	0		9.81589
11206	Regions/clus4	29288	13346	0		8.10386
11207	Regions/clus4	29368	13346	0		8.27466
11208	Regions/clus4	29448	13346	0		7.34521
11209	Regions/clus4	29528	13346	0		7.53781
11214	Regions/clus4	29928	13346	0		8.15488
11215	Regions/clus4	30008	13346	0		8.75017
11318	Regions/clus4	28728	13266	0		10.0547
11319	Regions/clus4	28808	13266	0		8.38497
11321	Regions/clus4	28968	13266	0		9.091
11322	Regions/clus4	29048	13266	0		8.92826
11323	Regions/clus4	29128	13266	0		8.56044
11324	Regions/clus4	29208	13266	0		8.52281
11327	Regions/clus4	29448	13266	0		8.58974
11328	Regions/clus4	29528	13266	0		8.17653
11329	Regions/clus4	29608	13266	0		7.79646
11330	Regions/clus4	29688	13266	0		6.81819
11331	Regions/clus4	29768	13266	0		6.96108
11355	Regions/clus4	31688	13266	0		6.48475
11359	Regions/clus4	32008	13266	0		7.3225
11370	Regions/clus4	32888	13266	0		7.71247
11438	Regions/clus4	28808	13186	0		7.53934
11439	Regions/clus4	28888	13186	0		7.53885
11440	Regions/clus4	28968	13186	0		8.67056
11441	Regions/clus4	29048	13186	0		8.06774
11448	Regions/clus4	29608	13186	0		7.51732
11451	Regions/clus4	29848	13186	0		7.74026
11452	Regions/clus4	29928	13186	0		6.59372
11453	Regions/clus4	30008	13186	0		7.34273
11454	Regions/clus4	30088	13186	0		6.54037
11455	Regions/clus4	30168	13186	0		8.5854
11474	Regions/clus4	31688	13186	0		7.04312
11552	Regions/clus4	28488	13106	0		8.09283
11553	Regions/clus4	28568	13106	0		7.4601
11554	Regions/clus4	28648	13106	0		8.6315
11559	Regions/clus4	29048	13106	0		8.51043
11569	Regions/clus4	29848	13106	0		8.13798
11570	Regions/clus4	29928	13106	0		7.26754
11571	Regions/clus4	30008	13106	0		7.76027
11573	Regions/clus4	30168	13106	0		6.75986
11574	Regions/clus4	30248	13106	0		6.2468
11577	Regions/clus4	30488	13106	0		7.99586
11591	Regions/clus4	31608	13106	0		8.1072
11604	Regions/clus4	32648	13106	0		6.60825
11647	Regions/clus4	26728	13026	0		9.29168
11648	Regions/clus4	26808	13026	0		8.89253
11665	Regions/clus4	28168	13026	0		8.6568
11668	Regions/clus4	28408	13026	0		9.51418
11669	Regions/clus4	28488	13026	0		7.53082
11670	Regions/clus4	28568	13026	0		8.29071
11671	Regions/clus4	28648	13026	0		7.89538
11688	Regions/clus4	30008	13026	0		7.21913
11689	Regions/clus4	30088	13026	0		7.90773
11690	Regions/clus4	30168	13026	0		7.42981
11691	Regions/clus4	30248	13026	0		6.7812
11692	Regions/clus4	30328	13026	0		6.95721
11694	Regions/clus4	30488	13026	0		5.43547
11695	Regions/clus4	30568	13026	0		6.67107
11708	Regions/clus4	31608	13026	0		7.50486
11709	Regions/clus4	31688	13026	0		7.45184
11765	Regions/clus4	26808	12946	0		7.00243
11766	Regions/clus4	26888	12946	0		9.69186
11767	Regions/clus4	26968	12946	0		7.13538
11785	Regions/clus4	28408	12946	0		7.70185
11786	Regions/clus4	28488	12946	0		7.50881
11787	Regions/clus4	28568	12946	0		8.59619
11788	Regions/clus4	28648	12946	0		9.90625
11789	Regions/clus4	28728	12946	0		7.51219
11806	Regions/clus4	30088	12946	0		6.89015
11807	Regions/clus4	30168	12946	0		6.51218
11808	Regions/clus4	30248	12946	0		7.49352
11809	Regions/clus4	30328	12946	0		6.68978
11811	Regions/clus4	30488	12946	0		7.07247
11823	Regions/clus4	31448	12946	0		6.76062
11824	Regions/clus4	31528	12946	0		6.0903
11825	Regions/clus4	31608	12946	0		6.99928
11827	Regions/clus4	31768	12946	0		7.81825
11842	Regions/clus4	32968	12946	0		9.09911
11881	Regions/clus4	26888	12866	0		7.47044
11883	Regions/clus4	27048	12866	0		8.60937
11898	Regions/clus4	28248	12866	0		8.69939
11899	Regions/clus4	28328	12866	0		8.1756
11900	Regions/clus4	28408	12866	0		8.27385
11901	Regions/clus4	28488	12866	0		7.07637
11902	Regions/clus4	28568	12866	0		8.4152
11903	Regions/clus4	28648	12866	0		8.7034
11923	Regions/clus4	30248	12866	0		6.93206
11924	Regions/clus4	30328	12866	0		5.80456
11925	Regions/clus4	30408	12866	0		6.00232
11927	Regions/clus4	30568	12866	0		7.01454
11940	Regions/clus4	31608	12866	0		7.4161
11941	Regions/clus4	31688	12866	0		6.83402
11995	Regions/clus4	26808	12786	0		8.16232
11998	Regions/clus4	27048	12786	0		8.18913
12015	Regions/clus4	28408	12786	0		8.20956
12016	Regions/clus4	28488	12786	0		7.15109
12017	Regions/clus4	28568	12786	0		7.92666
12018	Regions/clus4	28648	12786	0		7.02535
12037	Regions/clus4	30168	12786	0		6.9441
12038	Regions/clus4	30248	12786	0		6.3835
12051	Regions/clus4	31288	12786	0		7.20317
12110	Regions/clus4	26888	12706	0		8.27163
12111	Regions/clus4	26968	12706	0		7.61967
12113	Regions/clus4	27128	12706	0		8.46832
12114	Regions/clus4	27208	12706	0		6.82093
12115	Regions/clus4	27288	12706	0		7.34223
12130	Regions/clus4	28488	12706	0		6.62572
12131	Regions/clus4	28568	12706	0		8.27773
12132	Regions/clus4	28648	12706	0		7.69332
12133	Regions/clus4	28728	12706	0		7.36753
12149	Regions/clus4	30008	12706	0		5.62321
12151	Regions/clus4	30168	12706	0		6.27461
12152	Regions/clus4	30248	12706	0		7.48427
12153	Regions/clus4	30328	12706	0		6.93939
12161	Regions/clus4	30968	12706	0		6.19459
12163	Regions/clus4	31128	12706	0		6.57599
12164	Regions/clus4	31208	12706	0		6.68927
12223	Regions/clus4	26808	12626	0		6.80488
12227	Regions/clus4	27128	12626	0		7.06873
12228	Regions/clus4	27208	12626	0		7.13175
12230	Regions/clus4	27368	12626	0		7.26206
12232	Regions/clus4	27528	12626	0		5.91302
12243	Regions/clus4	28408	12626	0		7.72202
12244	Regions/clus4	28488	12626	0		6.72717
12245	Regions/clus4	28568	12626	0		7.65719
12263	Regions/clus4	30008	12626	0		7.1229
12264	Regions/clus4	30088	12626	0		6.1924
12265	Regions/clus4	30168	12626	0		7.03042
12266	Regions/clus4	30248	12626	0		6.07102
12276	Regions/clus4	31048	12626	0		6.65435
12277	Regions/clus4	31128	12626	0		6.41032
12278	Regions/clus4	31208	12626	0		7.31793
12279	Regions/clus4	31288	12626	0		7.11729
12281	Regions/clus4	31448	12626	0		7.50613
12342	Regions/clus4	27288	12546	0		8.55748
12344	Regions/clus4	27448	12546	0		7.43676
12345	Regions/clus4	27528	12546	0		6.69709
12346	Regions/clus4	27608	12546	0		6.52749
12355	Regions/clus4	28328	12546	0		6.68051
12356	Regions/clus4	28408	12546	0		6.9994
12376	Regions/clus4	30008	12546	0		7.20807
12378	Regions/clus4	30168	12546	0		7.13031
12379	Regions/clus4	30248	12546	0		7.82004
12380	Regions/clus4	30328	12546	0		6.96273
12392	Regions/clus4	31288	12546	0		7.43651
12451	Regions/clus4	27048	12466	0		8.20974
12456	Regions/clus4	27448	12466	0		6.58283
12458	Regions/clus4	27608	12466	0		6.06036
12467	Regions/clus4	28328	12466	0		6.87738
12468	Regions/clus4	28408	12466	0		6.94372
12469	Regions/clus4	28488	12466	0		7.28228
12470	Regions/clus4	28568	12466	0		8.08013
12489	Regions/clus4	30088	12466	0		7.32076
12490	Regions/clus4	30168	12466	0		8.02724
12491	Regions/clus4	30248	12466	0		8.15012
12492	Regions/clus4	30328	12466	0		7.19738
12505	Regions/clus4	31368	12466	0		8.02495
12577	Regions/clus4	28248	12386	0		6.02297
12578	Regions/clus4	28328	12386	0		6.43359
12579	Regions/clus4	28408	12386	0		6.97781
12580	Regions/clus4	28488	12386	0		6.3933
12581	Regions/clus4	28568	12386	0		7.10907
12582	Regions/clus4	28648	12386	0		7.21285
12598	Regions/clus4	29928	12386	0		6.72016
12600	Regions/clus4	30088	12386	0		6.85373
12601	Regions/clus4	30168	12386	0		7.43555
12602	Regions/clus4	30248	12386	0		6.68783
12603	Regions/clus4	30328	12386	0		6.88866
12615	Regions/clus4	31288	12386	0		7.10919
12674	Regions/clus4	27208	12306	0		7.4899
12677	Regions/clus4	27448	12306	0		6.48979
12687	Regions/clus4	28248	12306	0		6.00303
12688	Regions/clus4	28328	12306	0		6.73651
12691	Regions/clus4	28568	12306	0		9.04083
12692	Regions/clus4	28648	12306	0		7.92485
12693	Regions/clus4	28728	12306	0		7.21771
12694	Regions/clus4	28808	12306	0		7.8208
12708	Regions/clus4	29928	12306	0		7.43626
12709	Regions/clus4	30008	12306	0		6.8523
12710	Regions/clus4	30088	12306	0		6.84314
12711	Regions/clus4	30168	12306	0		7.09401
12712	Regions/clus4	30248	12306	0		8.09272
12714	Regions/clus4	30408	12306	0		7.88384
12715	Regions/clus4	30488	12306	0		8.59032
12797	Regions/clus4	28328	12226	0		7.40574
12799	Regions/clus4	28488	12226	0		8.17876
12800	Regions/clus4	28568	12226	0		7.17767
12801	Regions/clus4	28648	12226	0		8.9075
12802	Regions/clus4	28728	12226	0		7.64528
12817	Regions/clus4	29928	12226	0		7.50681
12818	Regions/clus4	30008	12226	0		6.35248
12819	Regions/clus4	30088	12226	0		7.15975
12820	Regions/clus4	30168	12226	0		7.15228
12821	Regions/clus4	30248	12226	0		7.73731
12905	Regions/clus4	28328	12146	0		9.02118
12906	Regions/clus4	28408	12146	0		9.06527
12907	Regions/clus4	28488	12146	0		7.59207
12908	Regions/clus4	28568	12146	0		9.21378
12909	Regions/clus4	28648	12146	0		7.81248
12910	Regions/clus4	28728	12146	0		8.2308
12923	Regions/clus4	29768	12146	0		7.32148
12924	Regions/clus4	29848	12146	0		6.75702
12925	Regions/clus4	29928	12146	0		6.86049
12926	Regions/clus4	30008	12146	0		6.78965
12928	Regions/clus4	30168	12146	0		8.4497
12929	Regions/clus4	30248	12146	0		7.20957
12932	Regions/clus4	30488	12146	0		8.25048
13010	Regions/clus4	28168	12066	0		8.52101
13011	Regions/clus4	28248	12066	0		9.46886
13012	Regions/clus4	28328	12066	0		7.85297
13013	Regions/clus4	28408	12066	0		8.95787
13014	Regions/clus4	28488	12066	0		7.7748
13016	Regions/clus4	28648	12066	0		9.04434
13017	Regions/clus4	28728	12066	0		9.01045
13031	Regions/clus4	29848	12066	0		7.06812
13032	Regions/clus4	29928	12066	0		6.20652
13034	Regions/clus4	30088	12066	0		8.6734
13035	Regions/clus4	30168	12066	0		8.73575
13036	Regions/clus4	30248	12066	0		7.70586
13038	Regions/clus4	30408	12066	0		8.10259
13039	Regions/clus4	30488	12066	0		6.33084
13041	Regions/clus4	30648	12066	0		7.43735
13117	Regions/clus4	28248	11986	0		7.31555
13118	Regions/clus4	28328	11986	0		8.3643
13119	Regions/clus4	28408	11986	0		8.85776
13120	Regions/clus4	28488	11986	0		7.82027
13121	Regions/clus4	28568	11986	0		9.12303
13122	Regions/clus4	28648	11986	0		7.45189
13123	Regions/clus4	28728	11986	0		9.52933
13124	Regions/clus4	28808	11986	0		8.53951
13136	Regions/clus4	29768	11986	0		7.22158
13137	Regions/clus4	29848	11986	0		7.68164
13138	Regions/clus4	29928	11986	0		7.2536
13139	Regions/clus4	30008	11986	0		7.65772
13140	Regions/clus4	30088	11986	0		7.78878
13141	Regions/clus4	30168	11986	0		7.68871
13143	Regions/clus4	30328	11986	0		8.85923
13144	Regions/clus4	30408	11986	0		10.9407
13222	Regions/clus4	28248	11906	0		8.29809
13223	Regions/clus4	28328	11906	0		7.4703
13224	Regions/clus4	28408	11906	0		7.80985
13225	Regions/clus4	28488	11906	0		8.23358
13226	Regions/clus4	28568	11906	0		9.57683
13227	Regions/clus4	28648	11906	0		9.17851
13228	Regions/clus4	28728	11906	0		9.99598
13229	Regions/clus4	28808	11906	0		9.44791
13239	Regions/clus4	29608	11906	0		8.29087
13240	Regions/clus4	29688	11906	0		7.2074
13241	Regions/clus4	29768	11906	0		6.9645
13242	Regions/clus4	29848	11906	0		7.41355
13243	Regions/clus4	29928	11906	0		6.49327
13244	Regions/clus4	30008	11906	0		7.04719
13330	Regions/clus4	28568	11826	0		10.2406
13331	Regions/clus4	28648	11826	0		11.2657
13332	Regions/clus4	28728	11826	0		11.2946
13333	Regions/clus4	28808	11826	0		10.915
13334	Regions/clus4	28888	11826	0		8.87943
13340	Regions/clus4	29368	11826	0		10.3104
13341	Regions/clus4	29448	11826	0		8.19982
13343	Regions/clus4	29608	11826	0		7.63307
13344	Regions/clus4	29688	11826	0		7.81142
13345	Regions/clus4	29768	11826	0		10.794
13438	Regions/clus4	28968	11746	0		12.8729
13444	Regions/clus4	29448	11746	0		10.0944
13535	Regions/clus4	27288	11586	0		8.71778
13634	Regions/clus4	17608	17346	0		6.98331
13636	Regions/clus4	17768	17346	0		11.1743
13964	Regions/clus4	16648	16946	0		7.51223
13965	Regions/clus4	16728	16946	0		8.71927
13966	Regions/clus4	16808	16946	0		8.88106
14048	Regions/clus4	16568	16866	0		9.81244
14049	Regions/clus4	16648	16866	0		8.70254
14050	Regions/clus4	16728	16866	0		8.44642
14051	Regions/clus4	16808	16866	0		9.93666
14066	Regions/clus4	18008	16866	0		10.674
14069	Regions/clus4	18248	16866	0		11.8966
14134	Regions/clus4	16488	16786	0		8.52497
14135	Regions/clus4	16568	16786	0		10.2337
14136	Regions/clus4	16648	16786	0		9.19908
14137	Regions/clus4	16728	16786	0		10.32
14138	Regions/clus4	16808	16786	0		10.142
14139	Regions/clus4	16888	16786	0		10.1241
14140	Regions/clus4	16968	16786	0		10.6195
14152	Regions/clus4	17928	16786	0		11.4686
14153	Regions/clus4	18008	16786	0		10.2151
14154	Regions/clus4	18088	16786	0		9.86904
14155	Regions/clus4	18168	16786	0		11.3826
14156	Regions/clus4	18248	16786	0		10.1954
14157	Regions/clus4	18328	16786	0		10.7557
14222	Regions/clus4	16488	16706	0		11.2752
14223	Regions/clus4	16568	16706	0		9.02502
14225	Regions/clus4	16728	16706	0		10.947
14226	Regions/clus4	16808	16706	0		9.97813
14227	Regions/clus4	16888	16706	0		10.2579
14240	Regions/clus4	17928	16706	0		9.24712
14241	Regions/clus4	18008	16706	0		8.21745
14243	Regions/clus4	18168	16706	0		9.60465
14244	Regions/clus4	18248	16706	0		10.5683
14245	Regions/clus4	18328	16706	0		13.3574
14309	Regions/clus4	16248	16626	0		10.1329
14310	Regions/clus4	16328	16626	0		8.67616
14311	Regions/clus4	16408	16626	0		9.37839
14312	Regions/clus4	16488	16626	0		9.64475
14315	Regions/clus4	16728	16626	0		10.7373
14316	Regions/clus4	16808	16626	0		10.65
14317	Regions/clus4	16888	16626	0		9.95282
14318	Regions/clus4	16968	16626	0		10.0439
14329	Regions/clus4	17848	16626	0		10.8849
14330	Regions/clus4	17928	16626	0		9.90398
14336	Regions/clus4	18408	16626	0		10.5214
14337	Regions/clus4	18488	16626	0		9.79168
14396	Regions/clus4	15848	16546	0		8.84462
14398	Regions/clus4	16008	16546	0		10.3117
14399	Regions/clus4	16088	16546	0		9.35099
14400	Regions/clus4	16168	16546	0		10.4546
14401	Regions/clus4	16248	16546	0		9.56099
14409	Regions/clus4	16888	16546	0		10.6186
14410	Regions/clus4	16968	16546	0		9.43393
14411	Regions/clus4	17048	16546	0		10.5599
14412	Regions/clus4	17128	16546	0		10.162
14413	Regions/clus4	17208	16546	0		10.388
14422	Regions/clus4	17928	16546	0		10.078
14429	Regions/clus4	18488	16546	0		9.35981
14430	Regions/clus4	18568	16546	0		11.1377
14487	Regions/clus4	15608	16466	0		8.47016
14489	Regions/clus4	15768	16466	0		9.43947
14490	Regions/clus4	15848	16466	0		9.26751
14494	Regions/clus4	16168	16466	0		9.4397
14505	Regions/clus4	17048	16466	0		9.96352
14506	Regions/clus4	17128	16466	0		10.8224
14509	Regions/clus4	17368	16466	0		10.0761
14513	Regions/clus4	17688	16466	0		10.0663
14514	Regions/clus4	17768	16466	0		9.11542
14527	Regions/clus4	18808	16466	0		9.82528
14528	Regions/clus4	18888	16466	0		10.7484
14531	Regions/clus4	19128	16466	0		10.9052
14533	Regions/clus4	19288	16466	0		11.127
14535	Regions/clus4	19448	16466	0		10.944
14579	Regions/clus4	15288	16386	0		9.32902
14582	Regions/clus4	15528	16386	0		9.53198
14583	Regions/clus4	15608	16386	0		10.1885
14584	Regions/clus4	15688	16386	0		10.1286
14602	Regions/clus4	17128	16386	0		10.9882
14603	Regions/clus4	17208	16386	0		10.3703
14605	Regions/clus4	17368	16386	0		9.39019
14606	Regions/clus4	17448	16386	0		8.05287
14607	Regions/clus4	17528	16386	0		8.64228
14609	Regions/clus4	17688	16386	0		9.24407
14610	Regions/clus4	17768	16386	0		9.01854
14628	Regions/clus4	19208	16386	0		10.2904
14629	Regions/clus4	19288	16386	0		9.20459
14630	Regions/clus4	19368	16386	0		10.5815
14631	Regions/clus4	19448	16386	0		10.8387
14633	Regions/clus4	19608	16386	0		11.496
14677	Regions/clus4	15368	16306	0		9.58925
14678	Regions/clus4	15448	16306	0		10.23
14679	Regions/clus4	15528	16306	0		10.5693
14700	Regions/clus4	17208	16306	0		11.3615
14701	Regions/clus4	17288	16306	0		9.50647
14702	Regions/clus4	17368	16306	0		9.00615
14703	Regions/clus4	17448	16306	0		8.15426
14704	Regions/clus4	17528	16306	0		9.75158
14705	Regions/clus4	17608	16306	0		9.55536
14706	Regions/clus4	17688	16306	0		10.099
14729	Regions/clus4	19528	16306	0		9.07939
14730	Regions/clus4	19608	16306	0		9.73767
14731	Regions/clus4	19688	16306	0		9.65854
14732	Regions/clus4	19768	16306	0		9.38604
14734	Regions/clus4	19928	16306	0		8.93419
14735	Regions/clus4	20008	16306	0		9.23796
14772	Regions/clus4	15128	16226	0		7.66982
14773	Regions/clus4	15208	16226	0		9.18291
14775	Regions/clus4	15368	16226	0		9.7215
14830	Regions/clus4	19768	16226	0		10.3829
14831	Regions/clus4	19848	16226	0		9.28011
14832	Regions/clus4	19928	16226	0		8.69351
14833	Regions/clus4	20008	16226	0		9.24271
14834	Regions/clus4	20088	16226	0		9.30867
14836	Regions/clus4	20248	16226	0		9.547
14870	Regions/clus4	15048	16146	0		8.27262
14871	Regions/clus4	15128	16146	0		7.73329
14931	Regions/clus4	19928	16146	0		8.84952
14933	Regions/clus4	20088	16146	0		9.56655
14935	Regions/clus4	20248	16146	0		8.66862
14967	Regions/clus4	14808	16066	0		7.00122
14969	Regions/clus4	14968	16066	0		6.9939
14971	Regions/clus4	15128	16066	0		7.87492
14985	Regions/clus4	16248	16066	0		8.94889
14986	Regions/clus4	16328	16066	0		8.79085
14987	Regions/clus4	16408	16066	0		9.62986
14988	Regions/clus4	16488	16066	0		9.06207
14989	Regions/clus4	16568	16066	0		9.94443
14990	Regions/clus4	16648	16066	0		8.75987
14991	Regions/clus4	16728	16066	0		10.353
15008	Regions/clus4	18088	16066	0		7.91002
15009	Regions/clus4	18168	16066	0		10.4644
15010	Regions/clus4	18248	16066	0		9.22215
15011	Regions/clus4	18328	16066	0		8.43255
15012	Regions/clus4	18408	16066	0		8.67439
15013	Regions/clus4	18488	16066	0		7.85306
15014	Regions/clus4	18568	16066	0		7.75561
15015	Regions/clus4	18648	16066	0		7.83851
15034	Regions/clus4	20168	16066	0		7.82543
15035	Regions/clus4	20248	16066	0		8.72182
15037	Regions/clus4	20408	16066	0		9.62565
15068	Regions/clus4	14728	15986	0		6.81385
15069	Regions/clus4	14808	15986	0		7.59296
15070	Regions/clus4	14888	15986	0		7.75177
15088	Regions/clus4	16328	15986	0		7.85574
15089	Regions/clus4	16408	15986	0		10.7129
15090	Regions/clus4	16488	15986	0		9.71758
15091	Regions/clus4	16568	15986	0		10.7819
15095	Regions/clus4	16888	15986	0		9.02283
15096	Regions/clus4	16968	15986	0		10.1811
15109	Regions/clus4	18008	15986	0		8.4362
15110	Regions/clus4	18088	15986	0		8.21192
15111	Regions/clus4	18168	15986	0		8.38803
15112	Regions/clus4	18248	15986	0		8.58743
15113	Regions/clus4	18328	15986	0		7.62009
15114	Regions/clus4	18408	15986	0		7.37609
15115	Regions/clus4	18488	15986	0		7.07926
15116	Regions/clus4	18568	15986	0		8.16608
15117	Regions/clus4	18648	15986	0		8.49844
15139	Regions/clus4	20408	15986	0		9.87676
15168	Regions/clus4	14568	15906	0		7.11726
15169	Regions/clus4	14648	15906	0		7.59105
15189	Regions/clus4	16248	15906	0		9.74776
15190	Regions/clus4	16328	15906	0		10.7734
15191	Regions/clus4	16408	15906	0		9.44579
15196	Regions/clus4	16808	15906	0		9.43298
15198	Regions/clus4	16968	15906	0		8.9798
15199	Regions/clus4	17048	15906	0		11.0437
15209	Regions/clus4	17848	15906	0		8.49724
15210	Regions/clus4	17928	15906	0		7.87945
15211	Regions/clus4	18008	15906	0		8.34136
15212	Regions/clus4	18088	15906	0		7.11907
15213	Regions/clus4	18168	15906	0		8.00413
15214	Regions/clus4	18248	15906	0		7.78166
15215	Regions/clus4	18328	15906	0		8.0872
15216	Regions/clus4	18408	15906	0		7.20201
15217	Regions/clus4	18488	15906	0		7.17775
15218	Regions/clus4	18568	15906	0		7.39572
15242	Regions/clus4	20488	15906	0		8.67602
15243	Regions/clus4	20568	15906	0		7.76035
15269	Regions/clus4	14408	15826	0		7.27299
15270	Regions/clus4	14488	15826	0		7.26705
15271	Regions/clus4	14568	15826	0		7.45221
15293	Regions/clus4	16328	15826	0		10.4359
15294	Regions/clus4	16408	15826	0		10.0665
15301	Regions/clus4	16968	15826	0		8.15505
15315	Regions/clus4	18088	15826	0		7.86363
15316	Regions/clus4	18168	15826	0		7.28608
15319	Regions/clus4	18408	15826	0		7.20751
15320	Regions/clus4	18488	15826	0		8.49264
15346	Regions/clus4	20568	15826	0		8.75423
15347	Regions/clus4	20648	15826	0		8.60724
15348	Regions/clus4	20728	15826	0		9.31871
15372	Regions/clus4	14248	15746	0		7.18257
15374	Regions/clus4	14408	15746	0		7.74937
15399	Regions/clus4	16408	15746	0		8.98962
15405	Regions/clus4	16888	15746	0		9.7356
15417	Regions/clus4	17848	15746	0		9.44719
15418	Regions/clus4	17928	15746	0		7.42055
15419	Regions/clus4	18008	15746	0		8.26146
15420	Regions/clus4	18088	15746	0		8.01449
15451	Regions/clus4	20568	15746	0		9.87857
15452	Regions/clus4	20648	15746	0		10.2125
15453	Regions/clus4	20728	15746	0		11.1687
15454	Regions/clus4	20808	15746	0		10.6987
15476	Regions/clus4	14168	15666	0		7.41363
15478	Regions/clus4	14328	15666	0		7.27706
15557	Regions/clus4	20648	15666	0		10.8555
15559	Regions/clus4	20808	15666	0		11.258
15561	Regions/clus4	20968	15666	0		11.7398
15581	Regions/clus4	14088	15586	0		7.13316
15583	Regions/clus4	14248	15586	0		6.53435
15621	Regions/clus4	17288	15586	0		9.54193
15665	Regions/clus4	20808	15586	0		10.1621
15666	Regions/clus4	20888	15586	0		10.4441
15667	Regions/clus4	20968	15586	0		10.6644
15688	Regions/clus4	14088	15506	0		6.48348
15763	Regions/clus4	20088	15506	0		6.36197
15772	Regions/clus4	20808	15506	0		10.8853
15773	Regions/clus4	20888	15506	0		9.8858
15774	Regions/clus4	20968	15506	0		10.8638
15881	Regions/clus4	20888	15426	0		9.86875
15882	Regions/clus4	20968	15426	0		10.7422
15904	Regions/clus4	14008	15346	0		7.61509
15990	Regions/clus4	20888	15346	0		9.29449
15991	Regions/clus4	20968	15346	0		9.93895
15992	Regions/clus4	21048	15346	0		9.09056
16014	Regions/clus4	14008	15266	0		7.67611
16101	Regions/clus4	20968	15266	0		10.4216
16102	Regions/clus4	21048	15266	0		8.74769
16103	Regions/clus4	21128	15266	0		8.48695
16123	Regions/clus4	13848	15186	0		5.8804
16124	Regions/clus4	13928	15186	0		6.9516
16125	Regions/clus4	14008	15186	0		5.87531
16206	Regions/clus4	20488	15186	0		8.15072
16213	Regions/clus4	21048	15186	0		9.58633
16214	Regions/clus4	21128	15186	0		9.96595
16320	Regions/clus4	20728	15106	0		9.62131
16325	Regions/clus4	21128	15106	0		9.65551
16326	Regions/clus4	21208	15106	0		12.1537
16335	Regions/clus4	21928	15106	0		7.56503
16344	Regions/clus4	13688	15026	0		6.2427
16345	Regions/clus4	13768	15026	0		6.66341
16346	Regions/clus4	13848	15026	0		6.22025
16347	Regions/clus4	13928	15026	0		6.37072
16352	Regions/clus4	14328	15026	0		6.27348
16356	Regions/clus4	14648	15026	0		6.81909
16432	Regions/clus4	20728	15026	0		10.0348
16436	Regions/clus4	21048	15026	0		11.2008
16437	Regions/clus4	21128	15026	0		10.9221
16438	Regions/clus4	21208	15026	0		10.15
16439	Regions/clus4	21288	15026	0		10.3121
16457	Regions/clus4	13768	14946	0		6.46904
16458	Regions/clus4	13848	14946	0		6.82321
16462	Regions/clus4	14168	14946	0		6.71812
16465	Regions/clus4	14408	14946	0		5.93235
16540	Regions/clus4	20408	14946	0		8.11661
16543	Regions/clus4	20648	14946	0		9.63841
16549	Regions/clus4	21128	14946	0		8.94376
16550	Regions/clus4	21208	14946	0		11.9112
16551	Regions/clus4	21288	14946	0		12.5137
16556	Regions/clus4	21688	14946	0		10.105
16558	Regions/clus4	21848	14946	0		7.50349
16576	Regions/clus4	14408	14866	0		6.26483
16624	Regions/clus4	18248	14866	0		6.16667
16654	Regions/clus4	20648	14866	0		9.36342
16656	Regions/clus4	20808	14866	0		11.5331
16657	Regions/clus4	20888	14866	0		12.1934
16661	Regions/clus4	21208	14866	0		10.0483
16662	Regions/clus4	21288	14866	0		11.9331
16663	Regions/clus4	21368	14866	0		9.96887
16664	Regions/clus4	21448	14866	0		10.2268
16679	Regions/clus4	13688	14786	0		5.349
16686	Regions/clus4	14248	14786	0		6.64374
16724	Regions/clus4	17288	14786	0		7.07844
16725	Regions/clus4	17368	14786	0		6.5978
16727	Regions/clus4	17528	14786	0		7.60685
16763	Regions/clus4	20408	14786	0		8.6012
16765	Regions/clus4	20568	14786	0		7.78328
16769	Regions/clus4	20888	14786	0		12.9023
16770	Regions/clus4	20968	14786	0		14.8369
16772	Regions/clus4	21128	14786	0		10.0436
16773	Regions/clus4	21208	14786	0		12.0354
16774	Regions/clus4	21288	14786	0		12.8863
16790	Regions/clus4	13688	14706	0		6.05786
16793	Regions/clus4	13928	14706	0		6.60039
16797	Regions/clus4	14248	14706	0		5.88429
16799	Regions/clus4	14408	14706	0		5.50035
16804	Regions/clus4	14808	14706	0		6.15596
16835	Regions/clus4	17288	14706	0		6.26332
16839	Regions/clus4	17608	14706	0		7.8119
16840	Regions/clus4	17688	14706	0		6.85479
16879	Regions/clus4	20808	14706	0		11.9451
16880	Regions/clus4	20888	14706	0		9.2322
16884	Regions/clus4	21208	14706	0		13.1619
16885	Regions/clus4	21288	14706	0		11.839
16886	Regions/clus4	21368	14706	0		13.2308
16887	Regions/clus4	21448	14706	0		10.4193
16905	Regions/clus4	14008	14626	0		5.26282
16909	Regions/clus4	14328	14626	0		5.54877
16945	Regions/clus4	17208	14626	0		6.9828
16946	Regions/clus4	17288	14626	0		6.73981
16947	Regions/clus4	17368	14626	0		6.6553
16950	Regions/clus4	17608	14626	0		6.57048
16956	Regions/clus4	18088	14626	0		7.53875
16957	Regions/clus4	18168	14626	0		6.11969
16958	Regions/clus4	18248	14626	0		6.46151
16987	Regions/clus4	20568	14626	0		9.57122
16988	Regions/clus4	20648	14626	0		10.18
16990	Regions/clus4	20808	14626	0		9.89712
16991	Regions/clus4	20888	14626	0		12.342
16995	Regions/clus4	21208	14626	0		14.3344
16996	Regions/clus4	21288	14626	0		12.1429
16997	Regions/clus4	21368	14626	0		11.6486
16998	Regions/clus4	21448	14626	0		11.4244
17009	Regions/clus4	13448	14546	0		5.99189
17010	Regions/clus4	13528	14546	0		6.31041
17011	Regions/clus4	13608	14546	0		6.40805
17012	Regions/clus4	13688	14546	0		6.87453
17019	Regions/clus4	14248	14546	0		6.22457
17020	Regions/clus4	14328	14546	0		5.82801
17021	Regions/clus4	14408	14546	0		5.89314
17022	Regions/clus4	14488	14546	0		6.1054
17024	Regions/clus4	14648	14546	0		5.72995
17047	Regions/clus4	16488	14546	0		6.0837
17056	Regions/clus4	17208	14546	0		6.90886
17059	Regions/clus4	17448	14546	0		6.85069
17061	Regions/clus4	17608	14546	0		7.27105
17068	Regions/clus4	18168	14546	0		6.35118
17069	Regions/clus4	18248	14546	0		6.77476
17070	Regions/clus4	18328	14546	0		6.33027
17099	Regions/clus4	20648	14546	0		9.71654
17107	Regions/clus4	21288	14546	0		14.7671
17108	Regions/clus4	21368	14546	0		13.0863
17109	Regions/clus4	21448	14546	0		9.20991
17121	Regions/clus4	13528	14466	0		6.08591
17122	Regions/clus4	13608	14466	0		5.62281
17130	Regions/clus4	14248	14466	0		5.46284
17134	Regions/clus4	14568	14466	0		5.29654
17161	Regions/clus4	16728	14466	0		6.20408
17167	Regions/clus4	17208	14466	0		6.21005
17169	Regions/clus4	17368	14466	0		7.53766
17173	Regions/clus4	17688	14466	0		6.2034
17179	Regions/clus4	18168	14466	0		5.99883
17210	Regions/clus4	20648	14466	0		8.82974
17211	Regions/clus4	20728	14466	0		8.62026
17215	Regions/clus4	21048	14466	0		11.8241
17217	Regions/clus4	21208	14466	0		17.6124
17218	Regions/clus4	21288	14466	0		10.6043
17219	Regions/clus4	21368	14466	0		13.3846
17221	Regions/clus4	21528	14466	0		13.9912
17231	Regions/clus4	13448	14386	0		5.69515
17232	Regions/clus4	13528	14386	0		5.56098
17278	Regions/clus4	17208	14386	0		6.04785
17288	Regions/clus4	18008	14386	0		6.34988
17321	Regions/clus4	20648	14386	0		8.23971
17327	Regions/clus4	21128	14386	0		16.543
17328	Regions/clus4	21208	14386	0		19.4604
17329	Regions/clus4	21288	14386	0		15.2981
17330	Regions/clus4	21368	14386	0		13.2377
17343	Regions/clus4	13528	14306	0		5.93582
17351	Regions/clus4	14168	14306	0		5.93126
17388	Regions/clus4	17128	14306	0		7.04644
17390	Regions/clus4	17288	14306	0		7.0056
17394	Regions/clus4	17608	14306	0		5.61915
17398	Regions/clus4	17928	14306	0		6.18838
17399	Regions/clus4	18008	14306	0		6.18639
17400	Regions/clus4	18088	14306	0		6.89118
17428	Regions/clus4	20328	14306	0		8.33386
17431	Regions/clus4	20568	14306	0		8.47785
17434	Regions/clus4	20808	14306	0		8.93991
17438	Regions/clus4	21128	14306	0		16.2598
17439	Regions/clus4	21208	14306	0		15.1606
17440	Regions/clus4	21288	14306	0		15.365
17441	Regions/clus4	21368	14306	0		14.3191
17454	Regions/clus4	13528	14226	0		5.45113
17455	Regions/clus4	13608	14226	0		6.30009
17462	Regions/clus4	14168	14226	0		6.16026
17468	Regions/clus4	14648	14226	0		5.97207
17505	Regions/clus4	17608	14226	0		6.26347
17507	Regions/clus4	17768	14226	0		7.33009
17512	Regions/clus4	18168	14226	0		6.05368
17513	Regions/clus4	18248	14226	0		6.22016
17543	Regions/clus4	20648	14226	0		7.96083
17550	Regions/clus4	21208	14226	0		13.7134
17565	Regions/clus4	13608	14146	0		6.17388
17612	Regions/clus4	17368	14146	0		6.62889
17615	Regions/clus4	17608	14146	0		7.06768
17616	Regions/clus4	17688	14146	0		6.49647
17651	Regions/clus4	20488	14146	0		7.8697
17659	Regions/clus4	21128	14146	0		15.342
17685	Regions/clus4	14328	14066	0		5.58422
17714	Regions/clus4	16648	14066	0		6.45986
17719	Regions/clus4	17048	14066	0		6.69986
17720	Regions/clus4	17128	14066	0		6.4812
17721	Regions/clus4	17208	14066	0		6.29603
17726	Regions/clus4	17608	14066	0		6.82895
17727	Regions/clus4	17688	14066	0		6.73376
17728	Regions/clus4	17768	14066	0		6.75261
17765	Regions/clus4	20728	14066	0		8.85408
17770	Regions/clus4	21128	14066	0		13.8572
17791	Regions/clus4	14008	13986	0		5.93784
17799	Regions/clus4	14648	13986	0		4.97274
17830	Regions/clus4	17128	13986	0		6.77977
17832	Regions/clus4	17288	13986	0		6.00503
17836	Regions/clus4	17608	13986	0		6.54943
17837	Regions/clus4	17688	13986	0		6.36353
17838	Regions/clus4	17768	13986	0		5.92263
17847	Regions/clus4	18488	13986	0		6.46426
17872	Regions/clus4	20488	13986	0		8.99015
17874	Regions/clus4	20648	13986	0		7.65753
17907	Regions/clus4	14488	13906	0		4.89321
17939	Regions/clus4	17048	13906	0		6.18246
17940	Regions/clus4	17128	13906	0		5.58176
17946	Regions/clus4	17608	13906	0		5.51395
17947	Regions/clus4	17688	13906	0		6.54636
17948	Regions/clus4	17768	13906	0		7.12381
17953	Regions/clus4	18168	13906	0		6.87274
17983	Regions/clus4	20568	13906	0		8.09517
17989	Regions/clus4	21048	13906	0		13.721
18016	Regions/clus4	14328	13826	0		5.91509
18020	Regions/clus4	14648	13826	0		5.76434
18023	Regions/clus4	14888	13826	0		5.75434
18051	Regions/clus4	17128	13826	0		5.21662
18054	Regions/clus4	17368	13826	0		6.25078
18055	Regions/clus4	17448	13826	0		6.27028
18056	Regions/clus4	17528	13826	0		6.11938
18058	Regions/clus4	17688	13826	0		6.84284
18060	Regions/clus4	17848	13826	0		5.4814
18090	Regions/clus4	20248	13826	0		6.5573
18100	Regions/clus4	21048	13826	0		12.0823
18135	Regions/clus4	15128	13746	0		6.31836
18160	Regions/clus4	17128	13746	0		6.25363
18163	Regions/clus4	17368	13746	0		5.70521
18165	Regions/clus4	17528	13746	0		5.72024
18167	Regions/clus4	17688	13746	0		5.75795
18168	Regions/clus4	17768	13746	0		6.12726
18169	Regions/clus4	17848	13746	0		6.64405
18204	Regions/clus4	20648	13746	0		9.11581
18213	Regions/clus4	21368	13746	0		9.91799
18228	Regions/clus4	13848	13666	0		6.22953
18241	Regions/clus4	14888	13666	0		6.53152
18242	Regions/clus4	14968	13666	0		5.64393
18269	Regions/clus4	17128	13666	0		6.61791
18271	Regions/clus4	17288	13666	0		6.13372
18272	Regions/clus4	17368	13666	0		5.88116
18274	Regions/clus4	17528	13666	0		5.79616
18277	Regions/clus4	17768	13666	0		6.34413
18278	Regions/clus4	17848	13666	0		5.74328
18309	Regions/clus4	20328	13666	0		8.17444
18317	Regions/clus4	20968	13666	0		7.7709
18346	Regions/clus4	14648	13586	0		6.69958
18378	Regions/clus4	17208	13586	0		5.90766
18379	Regions/clus4	17288	13586	0		5.81498
18380	Regions/clus4	17368	13586	0		5.71902
18381	Regions/clus4	17448	13586	0		6.45411
18382	Regions/clus4	17528	13586	0		7.47291
18384	Regions/clus4	17688	13586	0		7.95498
18385	Regions/clus4	17768	13586	0		6.26542
18386	Regions/clus4	17848	13586	0		6.5163
18392	Regions/clus4	18328	13586	0		6.22595
18393	Regions/clus4	18408	13586	0		6.00213
18394	Regions/clus4	18488	13586	0		6.25416
18395	Regions/clus4	18568	13586	0		7.02151
18425	Regions/clus4	20968	13586	0		8.91951
18443	Regions/clus4	13848	13506	0		6.61706
18456	Regions/clus4	14888	13506	0		7.51591
18478	Regions/clus4	16648	13506	0		5.69988
18479	Regions/clus4	16728	13506	0		5.84225
18480	Regions/clus4	16808	13506	0		6.15041
18486	Regions/clus4	17288	13506	0		6.19482
18492	Regions/clus4	17768	13506	0		5.83008
18500	Regions/clus4	18408	13506	0		5.7255
18501	Regions/clus4	18488	13506	0		6.03452
18561	Regions/clus4	15048	13426	0		7.22138
18578	Regions/clus4	16408	13426	0		6.01556
18580	Regions/clus4	16568	13426	0		5.22724
18581	Regions/clus4	16648	13426	0		5.58185
18582	Regions/clus4	16728	13426	0		6.03304
18583	Regions/clus4	16808	13426	0		6.54536
18584	Regions/clus4	16888	13426	0		6.15629
18588	Regions/clus4	17208	13426	0		6.29457
18599	Regions/clus4	18088	13426	0		6.22919
18602	Regions/clus4	18328	13426	0		6.53021
18603	Regions/clus4	18408	13426	0		5.80132
18604	Regions/clus4	18488	13426	0		5.85063
18605	Regions/clus4	18568	13426	0		6.69861
18606	Regions/clus4	18648	13426	0		7.10549
18648	Regions/clus4	13928	13346	0		10.478
18678	Regions/clus4	16328	13346	0		5.42573
18679	Regions/clus4	16408	13346	0		6.26718
18680	Regions/clus4	16488	13346	0		6.67406
18681	Regions/clus4	16568	13346	0		5.56453
18682	Regions/clus4	16648	13346	0		6.14728
18683	Regions/clus4	16728	13346	0		6.58882
18685	Regions/clus4	16888	13346	0		6.04331
18686	Regions/clus4	16968	13346	0		6.48245
18687	Regions/clus4	17048	13346	0		5.96056
18689	Regions/clus4	17208	13346	0		5.68645
18690	Regions/clus4	17288	13346	0		5.7402
18697	Regions/clus4	17848	13346	0		4.89671
18699	Regions/clus4	18008	13346	0		8.06745
18701	Regions/clus4	18168	13346	0		5.86137
18702	Regions/clus4	18248	13346	0		5.03792
18704	Regions/clus4	18408	13346	0		6.66267
18705	Regions/clus4	18488	13346	0		5.3734
18708	Regions/clus4	18728	13346	0		6.01642
18742	Regions/clus4	13528	13266	0		9.97455
18747	Regions/clus4	13928	13266	0		11.2039
18748	Regions/clus4	14008	13266	0		10.107
18758	Regions/clus4	14808	13266	0		7.77885
18760	Regions/clus4	14968	13266	0		9.04132
18761	Regions/clus4	15048	13266	0		6.97376
18775	Regions/clus4	16168	13266	0		5.88475
18777	Regions/clus4	16328	13266	0		5.6676
18778	Regions/clus4	16408	13266	0		5.89988
18780	Regions/clus4	16568	13266	0		6.17613
18781	Regions/clus4	16648	13266	0		5.76349
18782	Regions/clus4	16728	13266	0		6.40133
18783	Regions/clus4	16808	13266	0		6.19205
18787	Regions/clus4	17128	13266	0		6.94535
18788	Regions/clus4	17208	13266	0		6.14929
18789	Regions/clus4	17288	13266	0		5.62837
18790	Regions/clus4	17368	13266	0		6.51175
18791	Regions/clus4	17448	13266	0		6.30133
18803	Regions/clus4	18408	13266	0		6.54706
18804	Regions/clus4	18488	13266	0		5.99333
18805	Regions/clus4	18568	13266	0		6.24617
18806	Regions/clus4	18648	13266	0		6.09588
18807	Regions/clus4	18728	13266	0		5.46691
18808	Regions/clus4	18808	13266	0		4.96752
18810	Regions/clus4	18968	13266	0		5.18629
18833	Regions/clus4	20808	13266	0		7.9887
18842	Regions/clus4	13928	13186	0		10.3543
18857	Regions/clus4	15128	13186	0		7.30694
18866	Regions/clus4	15848	13186	0		6.9368
18868	Regions/clus4	16008	13186	0		5.45663
18872	Regions/clus4	16328	13186	0		5.72108
18873	Regions/clus4	16408	13186	0		6.19977
18874	Regions/clus4	16488	13186	0		6.32595
18875	Regions/clus4	16568	13186	0		5.99612
18878	Regions/clus4	16808	13186	0		6.15249
18890	Regions/clus4	17768	13186	0		5.44057
18899	Regions/clus4	18488	13186	0		6.27472
18900	Regions/clus4	18568	13186	0		6.44254
18901	Regions/clus4	18648	13186	0		6.58646
18902	Regions/clus4	18728	13186	0		6.7862
18905	Regions/clus4	18968	13186	0		5.14569
18920	Regions/clus4	20168	13186	0		8.63922
18927	Regions/clus4	20728	13186	0		12.0848
18942	Regions/clus4	14488	13106	0		8.6649
18943	Regions/clus4	14568	13106	0		8.11679
18944	Regions/clus4	14648	13106	0		8.40649
18950	Regions/clus4	15128	13106	0		8.24974
18951	Regions/clus4	15208	13106	0		7.01562
18952	Regions/clus4	15288	13106	0		5.92928
18955	Regions/clus4	15528	13106	0		6.1799
18957	Regions/clus4	15688	13106	0		6.34793
18958	Regions/clus4	15768	13106	0		6.61638
18959	Regions/clus4	15848	13106	0		6.1284
18966	Regions/clus4	16408	13106	0		6.89904
18967	Regions/clus4	16488	13106	0		6.37882
18968	Regions/clus4	16568	13106	0		6.14519
18969	Regions/clus4	16648	13106	0		5.36712
18971	Regions/clus4	16808	13106	0		5.84539
18991	Regions/clus4	18408	13106	0		6.86073
18992	Regions/clus4	18488	13106	0		5.9863
18993	Regions/clus4	18568	13106	0		5.56997
18995	Regions/clus4	18728	13106	0		5.25841
18996	Regions/clus4	18808	13106	0		5.97107
18997	Regions/clus4	18888	13106	0		5.95997
18998	Regions/clus4	18968	13106	0		5.1875
19019	Regions/clus4	20648	13106	0		8.65737
19030	Regions/clus4	14408	13026	0		8.8003
19031	Regions/clus4	14488	13026	0		8.20277
19032	Regions/clus4	14568	13026	0		9.12457
19033	Regions/clus4	14648	13026	0		6.64977
19035	Regions/clus4	14808	13026	0		6.83306
19036	Regions/clus4	14888	13026	0		7.4828
19037	Regions/clus4	14968	13026	0		7.83598
19039	Regions/clus4	15128	13026	0		7.4033
19040	Regions/clus4	15208	13026	0		7.42729
19041	Regions/clus4	15288	13026	0		6.10634
19043	Regions/clus4	15448	13026	0		6.79809
19044	Regions/clus4	15528	13026	0		6.04135
19045	Regions/clus4	15608	13026	0		7.0001
19046	Regions/clus4	15688	13026	0		7.49606
19048	Regions/clus4	15848	13026	0		6.85261
19049	Regions/clus4	15928	13026	0		5.84642
19053	Regions/clus4	16248	13026	0		5.58839
19055	Regions/clus4	16408	13026	0		5.77707
19056	Regions/clus4	16488	13026	0		7.15498
19058	Regions/clus4	16648	13026	0		5.15806
19062	Regions/clus4	16968	13026	0		5.84642
19066	Regions/clus4	17288	13026	0		6.19801
19072	Regions/clus4	17768	13026	0		5.367
19079	Regions/clus4	18328	13026	0		5.46387
19082	Regions/clus4	18568	13026	0		6.40352
19083	Regions/clus4	18648	13026	0		5.79489
19085	Regions/clus4	18808	13026	0		5.36114
19096	Regions/clus4	19688	13026	0		5.84412
19108	Regions/clus4	20648	13026	0		9.6537
19110	Regions/clus4	20808	13026	0		8.41979
19117	Regions/clus4	14408	12946	0		7.66104
19118	Regions/clus4	14488	12946	0		9.62106
19119	Regions/clus4	14568	12946	0		8.6751
19120	Regions/clus4	14648	12946	0		8.45997
19121	Regions/clus4	14728	12946	0		7.46274
19124	Regions/clus4	14968	12946	0		7.64359
19125	Regions/clus4	15048	12946	0		7.07469
19126	Regions/clus4	15128	12946	0		6.67532
19127	Regions/clus4	15208	12946	0		6.55702
19128	Regions/clus4	15288	12946	0		6.69158
19129	Regions/clus4	15368	12946	0		7.08828
19130	Regions/clus4	15448	12946	0		6.0262
19131	Regions/clus4	15528	12946	0		5.7826
19132	Regions/clus4	15608	12946	0		5.89351
19133	Regions/clus4	15688	12946	0		6.98616
19135	Regions/clus4	15848	12946	0		6.32949
19136	Regions/clus4	15928	12946	0		6.38168
19142	Regions/clus4	16408	12946	0		5.93421
19143	Regions/clus4	16488	12946	0		6.94373
19144	Regions/clus4	16568	12946	0		6.29849
19167	Regions/clus4	18408	12946	0		6.59462
19169	Regions/clus4	18568	12946	0		5.95989
19170	Regions/clus4	18648	12946	0		6.04736
19171	Regions/clus4	18728	12946	0		5.40583
19172	Regions/clus4	18808	12946	0		5.43906
19173	Regions/clus4	18888	12946	0		5.36213
19193	Regions/clus4	20488	12946	0		9.57059
19195	Regions/clus4	20648	12946	0		9.11124
19196	Regions/clus4	20728	12946	0		9.83298
19197	Regions/clus4	20808	12946	0		8.71925
19200	Regions/clus4	14408	12866	0		9.19504
19201	Regions/clus4	14488	12866	0		11.3622
19202	Regions/clus4	14568	12866	0		8.63669
19206	Regions/clus4	14888	12866	0		7.75815
19207	Regions/clus4	14968	12866	0		7.42225
19208	Regions/clus4	15048	12866	0		7.04515
19212	Regions/clus4	15368	12866	0		7.35761
19213	Regions/clus4	15448	12866	0		7.44784
19214	Regions/clus4	15528	12866	0		5.71335
19215	Regions/clus4	15608	12866	0		5.79094
19217	Regions/clus4	15768	12866	0		6.28598
19218	Regions/clus4	15848	12866	0		6.75916
19219	Regions/clus4	15928	12866	0		6.48499
19221	Regions/clus4	16088	12866	0		6.91453
19222	Regions/clus4	16168	12866	0		5.91228
19223	Regions/clus4	16248	12866	0		5.81411
19224	Regions/clus4	16328	12866	0		5.89153
19225	Regions/clus4	16408	12866	0		7.25359
19227	Regions/clus4	16568	12866	0		6.74656
19228	Regions/clus4	16648	12866	0		7.08118
19235	Regions/clus4	17208	12866	0		4.7792
19252	Regions/clus4	18568	12866	0		5.85372
19253	Regions/clus4	18648	12866	0		6.03633
19254	Regions/clus4	18728	12866	0		6.71229
19255	Regions/clus4	18808	12866	0		5.75443
19256	Regions/clus4	18888	12866	0		5.65481
19268	Regions/clus4	19848	12866	0		6.71064
19274	Regions/clus4	20328	12866	0		9.6378
19276	Regions/clus4	20488	12866	0		9.36652
19283	Regions/clus4	14568	12786	0		8.76195
19286	Regions/clus4	14808	12786	0		9.65471
19287	Regions/clus4	14888	12786	0		10.2528
19288	Regions/clus4	14968	12786	0		8.67533
19289	Regions/clus4	15048	12786	0		8.60745
19290	Regions/clus4	15128	12786	0		7.36299
19291	Regions/clus4	15208	12786	0		6.49803
19292	Regions/clus4	15288	12786	0		6.81784
19293	Regions/clus4	15368	12786	0		7.33898
19294	Regions/clus4	15448	12786	0		9.14295
19295	Regions/clus4	15528	12786	0		8.49433
19296	Regions/clus4	15608	12786	0		5.90257
19297	Regions/clus4	15688	12786	0		6.7493
19299	Regions/clus4	15848	12786	0		6.36432
19300	Regions/clus4	15928	12786	0		5.82116
19301	Regions/clus4	16008	12786	0		5.9493
19302	Regions/clus4	16088	12786	0		6.13573
19303	Regions/clus4	16168	12786	0		5.56971
19304	Regions/clus4	16248	12786	0		6.33105
19305	Regions/clus4	16328	12786	0		6.93163
19306	Regions/clus4	16408	12786	0		7.01465
19307	Regions/clus4	16488	12786	0		7.25664
19308	Regions/clus4	16568	12786	0		6.20729
19309	Regions/clus4	16648	12786	0		7.21283
19310	Regions/clus4	16728	12786	0		6.56543
19332	Regions/clus4	18488	12786	0		5.73046
19333	Regions/clus4	18568	12786	0		6.35918
19334	Regions/clus4	18648	12786	0		5.8391
19335	Regions/clus4	18728	12786	0		6.11403
19336	Regions/clus4	18808	12786	0		5.38525
19338	Regions/clus4	18968	12786	0		5.55898
19339	Regions/clus4	19048	12786	0		6.45802
19348	Regions/clus4	19768	12786	0		6.18465
19349	Regions/clus4	19848	12786	0		6.36985
19350	Regions/clus4	19928	12786	0		7.53438
19351	Regions/clus4	20008	12786	0		7.74371
19354	Regions/clus4	20248	12786	0		8.63991
19357	Regions/clus4	20488	12786	0		11.6788
19359	Regions/clus4	20648	12786	0		8.73086
19360	Regions/clus4	20728	12786	0		12.979
19364	Regions/clus4	14728	12706	0		7.6227
19365	Regions/clus4	14808	12706	0		9.25849
19366	Regions/clus4	14888	12706	0		9.85374
19367	Regions/clus4	14968	12706	0		9.15747
19368	Regions/clus4	15048	12706	0		8.04437
19369	Regions/clus4	15128	12706	0		9.42299
19370	Regions/clus4	15208	12706	0		7.52399
19371	Regions/clus4	15288	12706	0		6.80594
19373	Regions/clus4	15448	12706	0		6.83146
19374	Regions/clus4	15528	12706	0		8.67209
19377	Regions/clus4	15768	12706	0		6.76673
19378	Regions/clus4	15848	12706	0		6.97417
19380	Regions/clus4	16008	12706	0		6.93393
19381	Regions/clus4	16088	12706	0		6.15218
19382	Regions/clus4	16168	12706	0		6.04115
19384	Regions/clus4	16328	12706	0		6.16602
19385	Regions/clus4	16408	12706	0		7.11823
19386	Regions/clus4	16488	12706	0		6.77474
19387	Regions/clus4	16568	12706	0		5.95302
19388	Regions/clus4	16648	12706	0		6.63171
19389	Regions/clus4	16728	12706	0		5.53452
19408	Regions/clus4	18248	12706	0		5.801
19409	Regions/clus4	18328	12706	0		5.59694
19410	Regions/clus4	18408	12706	0		5.65967
19411	Regions/clus4	18488	12706	0		6.00512
19412	Regions/clus4	18568	12706	0		5.56895
19414	Regions/clus4	18728	12706	0		5.67591
19415	Regions/clus4	18808	12706	0		6.63215
19416	Regions/clus4	18888	12706	0		4.97051
19417	Regions/clus4	18968	12706	0		5.6364
19418	Regions/clus4	19048	12706	0		5.88894
19423	Regions/clus4	19448	12706	0		5.37441
19424	Regions/clus4	19528	12706	0		5.24932
19431	Regions/clus4	20088	12706	0		9.43235
19433	Regions/clus4	20248	12706	0		10.0186
19434	Regions/clus4	20328	12706	0		9.57933
19435	Regions/clus4	20408	12706	0		9.43741
19437	Regions/clus4	20568	12706	0		11.0835
19438	Regions/clus4	20648	12706	0		8.47209
19439	Regions/clus4	20728	12706	0		11.7533
19442	Regions/clus4	14968	12626	0		7.79952
19443	Regions/clus4	15048	12626	0		10.2878
19444	Regions/clus4	15128	12626	0		10.1571
19445	Regions/clus4	15208	12626	0		8.49813
19451	Regions/clus4	15688	12626	0		5.75181
19452	Regions/clus4	15768	12626	0		6.92578
19453	Regions/clus4	15848	12626	0		8.16691
19454	Regions/clus4	15928	12626	0		7.54912
19455	Regions/clus4	16008	12626	0		6.62166
19456	Regions/clus4	16088	12626	0		5.89741
19460	Regions/clus4	16408	12626	0		6.52889
19462	Regions/clus4	16568	12626	0		6.93236
19464	Regions/clus4	16728	12626	0		6.35633
19468	Regions/clus4	17048	12626	0		6.17437
19482	Regions/clus4	18168	12626	0		6.08959
19483	Regions/clus4	18248	12626	0		5.85355
19484	Regions/clus4	18328	12626	0		6.30957
19485	Regions/clus4	18408	12626	0		5.76442
19486	Regions/clus4	18488	12626	0		5.7162
19487	Regions/clus4	18568	12626	0		5.28527
19488	Regions/clus4	18648	12626	0		6.1741
19489	Regions/clus4	18728	12626	0		5.50781
19490	Regions/clus4	18808	12626	0		4.68842
19491	Regions/clus4	18888	12626	0		4.72924
19492	Regions/clus4	18968	12626	0		6.21299
19493	Regions/clus4	19048	12626	0		5.72296
19494	Regions/clus4	19128	12626	0		6.07377
19504	Regions/clus4	19928	12626	0		7.97394
19507	Regions/clus4	20168	12626	0		9.43844
19508	Regions/clus4	20248	12626	0		8.72455
19509	Regions/clus4	20328	12626	0		10.3826
19510	Regions/clus4	20408	12626	0		9.69325
19511	Regions/clus4	20488	12626	0		11.0562
19512	Regions/clus4	20568	12626	0		10.1663
19517	Regions/clus4	15128	12546	0		6.65092
19518	Regions/clus4	15208	12546	0		8.87333
19525	Regions/clus4	15768	12546	0		7.6634
19526	Regions/clus4	15848	12546	0		7.71894
19527	Regions/clus4	15928	12546	0		6.52643
19528	Regions/clus4	16008	12546	0		6.59549
19533	Regions/clus4	16408	12546	0		7.45009
19534	Regions/clus4	16488	12546	0		7.45693
19535	Regions/clus4	16568	12546	0		7.93593
19537	Regions/clus4	16728	12546	0		6.75959
19553	Regions/clus4	18008	12546	0		5.80757
19556	Regions/clus4	18248	12546	0		5.48296
19557	Regions/clus4	18328	12546	0		5.51699
19558	Regions/clus4	18408	12546	0		6.61059
19559	Regions/clus4	18488	12546	0		5.26032
19560	Regions/clus4	18568	12546	0		6.45484
19561	Regions/clus4	18648	12546	0		6.40203
19563	Regions/clus4	18808	12546	0		6.00168
19565	Regions/clus4	18968	12546	0		6.33157
19567	Regions/clus4	19128	12546	0		5.37499
19580	Regions/clus4	20168	12546	0		8.40423
19581	Regions/clus4	20248	12546	0		10.7944
19582	Regions/clus4	20328	12546	0		9.64897
19583	Regions/clus4	20408	12546	0		10.5385
19584	Regions/clus4	20488	12546	0		9.45947
19585	Regions/clus4	20568	12546	0		12.6386
19589	Regions/clus4	15368	12466	0		7.7789
19596	Regions/clus4	15928	12466	0		6.22139
19597	Regions/clus4	16008	12466	0		6.40293
19602	Regions/clus4	16408	12466	0		7.66638
19603	Regions/clus4	16488	12466	0		6.63751
19604	Regions/clus4	16568	12466	0		6.62855
19605	Regions/clus4	16648	12466	0		5.54345
19606	Regions/clus4	16728	12466	0		6.389
19623	Regions/clus4	18088	12466	0		6.06914
19624	Regions/clus4	18168	12466	0		5.86181
19625	Regions/clus4	18248	12466	0		5.23339
19626	Regions/clus4	18328	12466	0		6.10579
19627	Regions/clus4	18408	12466	0		6.59639
19628	Regions/clus4	18488	12466	0		5.88074
19630	Regions/clus4	18648	12466	0		6.13118
19635	Regions/clus4	19048	12466	0		5.30261
19646	Regions/clus4	19928	12466	0		7.11898
19648	Regions/clus4	20088	12466	0		8.19237
[truncated: 3,708 more rows]

## Sheet: Figure S7E
spotId	raster	x	y	z	Date	N-Acetylaspartate/Aspartate
18	Regions/clus5	5128	16226	0		6.77075
122	Regions/clus5	6968	16066	0		4.05742
255	Regions/clus5	7368	15906	0		4.68201
761	Regions/clus5	3528	15346	0		9.14636
765	Regions/clus5	3848	15346	0		10.7598
767	Regions/clus5	4008	15346	0		7.64907
768	Regions/clus5	4088	15346	0		7.32495
846	Regions/clus5	3208	15266	0		10.002
847	Regions/clus5	3288	15266	0		9.78349
850	Regions/clus5	3528	15266	0		9.47636
874	Regions/clus5	5448	15266	0		8.89337
875	Regions/clus5	5528	15266	0		12.118
876	Regions/clus5	5608	15266	0		9.77077
931	Regions/clus5	2728	15186	0		12.6082
934	Regions/clus5	2968	15186	0		10.2525
952	Regions/clus5	4408	15186	0		10.4448
964	Regions/clus5	5368	15186	0		9.16864
1025	Regions/clus5	2808	15106	0		11.7111
1030	Regions/clus5	3208	15106	0		10.9977
1045	Regions/clus5	4408	15106	0		7.90322
1059	Regions/clus5	5528	15106	0		10.5721
1060	Regions/clus5	5608	15106	0		10.6106
1063	Regions/clus5	5848	15106	0		10.1914
1067	Regions/clus5	6168	15106	0		11.6024
1118	Regions/clus5	2568	15026	0		11.3314
1119	Regions/clus5	2648	15026	0		17.7052
1144	Regions/clus5	4648	15026	0		9.31194
1146	Regions/clus5	4808	15026	0		9.43831
1147	Regions/clus5	4888	15026	0		10.3136
1150	Regions/clus5	5128	15026	0		8.79708
1151	Regions/clus5	5208	15026	0		9.56304
1156	Regions/clus5	5608	15026	0		11.4779
1157	Regions/clus5	5688	15026	0		10.6527
1158	Regions/clus5	5768	15026	0		9.51067
1164	Regions/clus5	6248	15026	0		12.9723
1165	Regions/clus5	6328	15026	0		11.2303
1215	Regions/clus5	2408	14946	0		8.99573
1216	Regions/clus5	2488	14946	0		8.93706
1217	Regions/clus5	2568	14946	0		16.2527
1222	Regions/clus5	2968	14946	0		9.39648
1223	Regions/clus5	3048	14946	0		11.3058
1243	Regions/clus5	4648	14946	0		9.39636
1246	Regions/clus5	4888	14946	0		11.2008
1256	Regions/clus5	5688	14946	0		9.69687
1264	Regions/clus5	6328	14946	0		9.164
1265	Regions/clus5	6408	14946	0		9.09303
1266	Regions/clus5	6488	14946	0		10.7525
1313	Regions/clus5	2248	14866	0		7.92151
1314	Regions/clus5	2328	14866	0		8.29918
1315	Regions/clus5	2408	14866	0		10.7257
1316	Regions/clus5	2488	14866	0		17.2234
1321	Regions/clus5	2888	14866	0		17.0883
1322	Regions/clus5	2968	14866	0		9.20629
1357	Regions/clus5	5768	14866	0		10.6895
1358	Regions/clus5	5848	14866	0		11.1952
1366	Regions/clus5	6488	14866	0		8.75145
1368	Regions/clus5	6648	14866	0		11.82
1370	Regions/clus5	6808	14866	0		10.7603
1398	Regions/clus5	9048	14866	0		4.60543
1399	Regions/clus5	888	14786	0		5.66313
1415	Regions/clus5	2168	14786	0		8.43323
1416	Regions/clus5	2248	14786	0		10.1786
1417	Regions/clus5	2328	14786	0		9.99386
1418	Regions/clus5	2408	14786	0		26.8268
1424	Regions/clus5	2888	14786	0		18.4446
1460	Regions/clus5	5768	14786	0		10.3098
1461	Regions/clus5	5848	14786	0		10.5112
1471	Regions/clus5	6648	14786	0		11.7859
1472	Regions/clus5	6728	14786	0		11.9692
1503	Regions/clus5	808	14706	0		8.25018
1505	Regions/clus5	968	14706	0		10.1249
1518	Regions/clus5	2008	14706	0		19.6966
1520	Regions/clus5	2168	14706	0		14.3506
1521	Regions/clus5	2248	14706	0		12.4846
1522	Regions/clus5	2328	14706	0		19.1253
1528	Regions/clus5	2808	14706	0		40.0059
1529	Regions/clus5	2888	14706	0		17.0314
1564	Regions/clus5	5688	14706	0		8.63867
1565	Regions/clus5	5768	14706	0		9.24188
1566	Regions/clus5	5848	14706	0		10.0714
1568	Regions/clus5	6008	14706	0		12.4864
1577	Regions/clus5	6728	14706	0		11.5957
1579	Regions/clus5	6888	14706	0		12.2339
1580	Regions/clus5	6968	14706	0		10.1055
1609	Regions/clus5	808	14626	0		5.44952
1610	Regions/clus5	888	14626	0		12.3089
1623	Regions/clus5	1928	14626	0		9.54936
1624	Regions/clus5	2008	14626	0		13.125
1625	Regions/clus5	2088	14626	0		18.1068
1626	Regions/clus5	2168	14626	0		11.6527
1627	Regions/clus5	2248	14626	0		12.7838
1634	Regions/clus5	2808	14626	0		25.2547
1635	Regions/clus5	2888	14626	0		21.2202
1636	Regions/clus5	2968	14626	0		15.1083
1637	Regions/clus5	3048	14626	0		14.7767
1638	Regions/clus5	3128	14626	0		12.8902
1669	Regions/clus5	5608	14626	0		7.86203
1670	Regions/clus5	5688	14626	0		9.89781
1672	Regions/clus5	5848	14626	0		10.577
1673	Regions/clus5	5928	14626	0		8.94083
1674	Regions/clus5	6008	14626	0		9.52571
1675	Regions/clus5	6088	14626	0		9.60099
1688	Regions/clus5	7128	14626	0		9.37471
1690	Regions/clus5	7288	14626	0		7.973
1691	Regions/clus5	7368	14626	0		9.20649
1715	Regions/clus5	808	14546	0		5.59944
1728	Regions/clus5	1848	14546	0		10.2432
1729	Regions/clus5	1928	14546	0		10.2727
1730	Regions/clus5	2008	14546	0		9.37788
1731	Regions/clus5	2088	14546	0		8.04046
1732	Regions/clus5	2168	14546	0		9.49649
1733	Regions/clus5	2248	14546	0		25.5531
1735	Regions/clus5	2408	14546	0		22.1789
1740	Regions/clus5	2808	14546	0		14.2772
1741	Regions/clus5	2888	14546	0		14.7375
1742	Regions/clus5	2968	14546	0		11.8204
1743	Regions/clus5	3048	14546	0		11.4156
1744	Regions/clus5	3128	14546	0		13.9871
1745	Regions/clus5	3208	14546	0		14.2493
1774	Regions/clus5	5528	14546	0		7.53164
1775	Regions/clus5	5608	14546	0		7.91911
1776	Regions/clus5	5688	14546	0		9.19817
1777	Regions/clus5	5768	14546	0		9.53911
1778	Regions/clus5	5848	14546	0		8.74548
1779	Regions/clus5	5928	14546	0		9.64041
1780	Regions/clus5	6008	14546	0		10.5115
1781	Regions/clus5	6088	14546	0		9.44627
1798	Regions/clus5	7448	14546	0		7.17476
1835	Regions/clus5	1768	14466	0		8.64893
1836	Regions/clus5	1848	14466	0		8.02328
1837	Regions/clus5	1928	14466	0		8.86431
1838	Regions/clus5	2008	14466	0		7.65161
1839	Regions/clus5	2088	14466	0		8.24746
1840	Regions/clus5	2168	14466	0		10.4191
1841	Regions/clus5	2248	14466	0		16.3635
1847	Regions/clus5	2728	14466	0		19.2108
1848	Regions/clus5	2808	14466	0		15.3353
1849	Regions/clus5	2888	14466	0		14.011
1850	Regions/clus5	2968	14466	0		10.8405
1851	Regions/clus5	3048	14466	0		9.7354
1853	Regions/clus5	3208	14466	0		13.289
1854	Regions/clus5	3288	14466	0		12.738
1855	Regions/clus5	3368	14466	0		12.1471
1884	Regions/clus5	5688	14466	0		10.2384
1885	Regions/clus5	5768	14466	0		11.9839
1886	Regions/clus5	5848	14466	0		9.49853
1887	Regions/clus5	5928	14466	0		8.67954
1888	Regions/clus5	6008	14466	0		10.5045
1889	Regions/clus5	6088	14466	0		8.21583
1890	Regions/clus5	6168	14466	0		10.3911
1892	Regions/clus5	6328	14466	0		11.2555
1902	Regions/clus5	7128	14466	0		8.8326
1906	Regions/clus5	7448	14466	0		8.49259
1907	Regions/clus5	7528	14466	0		6.43653
1908	Regions/clus5	7608	14466	0		8.43924
1932	Regions/clus5	808	14386	0		6.01829
1943	Regions/clus5	1688	14386	0		7.86821
1944	Regions/clus5	1768	14386	0		8.45925
1945	Regions/clus5	1848	14386	0		6.55248
1946	Regions/clus5	1928	14386	0		9.01122
1949	Regions/clus5	2168	14386	0		9.53688
1955	Regions/clus5	2648	14386	0		10.9864
1956	Regions/clus5	2728	14386	0		12.9841
1957	Regions/clus5	2808	14386	0		11.8475
1958	Regions/clus5	2888	14386	0		14.9795
1959	Regions/clus5	2968	14386	0		14.6214
1960	Regions/clus5	3048	14386	0		10.1659
1961	Regions/clus5	3128	14386	0		9.37031
1997	Regions/clus5	6008	14386	0		9.38324
1998	Regions/clus5	6088	14386	0		10.7524
2002	Regions/clus5	6408	14386	0		10.6792
2008	Regions/clus5	6888	14386	0		10.543
2017	Regions/clus5	7608	14386	0		8.61884
2040	Regions/clus5	648	14306	0		6.61806
2042	Regions/clus5	808	14306	0		6.60861
2052	Regions/clus5	1608	14306	0		7.55291
2053	Regions/clus5	1688	14306	0		9.18063
2054	Regions/clus5	1768	14306	0		8.29565
2055	Regions/clus5	1848	14306	0		7.96355
2060	Regions/clus5	2248	14306	0		12.1004
2064	Regions/clus5	2568	14306	0		17.5012
2065	Regions/clus5	2648	14306	0		9.90201
2066	Regions/clus5	2728	14306	0		10.1256
2067	Regions/clus5	2808	14306	0		11.8703
2068	Regions/clus5	2888	14306	0		12.0808
2069	Regions/clus5	2968	14306	0		11.3242
2109	Regions/clus5	6168	14306	0		8.86912
2113	Regions/clus5	6488	14306	0		11.365
2118	Regions/clus5	6888	14306	0		10.3488
2127	Regions/clus5	7608	14306	0		7.90202
2128	Regions/clus5	7688	14306	0		6.94177
2129	Regions/clus5	7768	14306	0		7.52855
2153	Regions/clus5	808	14226	0		21.1492
2162	Regions/clus5	1528	14226	0		8.3495
2163	Regions/clus5	1608	14226	0		8.1808
2164	Regions/clus5	1688	14226	0		7.97784
2165	Regions/clus5	1768	14226	0		7.79649
2166	Regions/clus5	1848	14226	0		9.88326
2174	Regions/clus5	2488	14226	0		9.87163
2175	Regions/clus5	2568	14226	0		9.74435
2176	Regions/clus5	2648	14226	0		14.8221
2177	Regions/clus5	2728	14226	0		8.78589
2178	Regions/clus5	2808	14226	0		10.2306
2179	Regions/clus5	2888	14226	0		7.30916
2208	Regions/clus5	5208	14226	0		6.08251
2223	Regions/clus5	6408	14226	0		11.7452
2224	Regions/clus5	6488	14226	0		9.6221
2229	Regions/clus5	6888	14226	0		9.34994
2230	Regions/clus5	6968	14226	0		10.4194
2240	Regions/clus5	7768	14226	0		7.87725
2241	Regions/clus5	7848	14226	0		6.04208
2262	Regions/clus5	648	14146	0		7.41185
2274	Regions/clus5	1608	14146	0		7.00454
2275	Regions/clus5	1688	14146	0		7.04566
2279	Regions/clus5	2008	14146	0		6.98044
2280	Regions/clus5	2088	14146	0		7.02814
2284	Regions/clus5	2408	14146	0		10.7471
2285	Regions/clus5	2488	14146	0		12.0262
2286	Regions/clus5	2568	14146	0		9.55387
2287	Regions/clus5	2648	14146	0		11.1044
2288	Regions/clus5	2728	14146	0		9.11069
2289	Regions/clus5	2808	14146	0		8.92769
2320	Regions/clus5	5288	14146	0		6.20697
2321	Regions/clus5	5368	14146	0		7.16356
2334	Regions/clus5	6408	14146	0		13.036
2341	Regions/clus5	6968	14146	0		10.3395
2342	Regions/clus5	7048	14146	0		9.53023
2343	Regions/clus5	7128	14146	0		10.1079
2352	Regions/clus5	7848	14146	0		8.95891
2374	Regions/clus5	568	14066	0		6.7003
2375	Regions/clus5	648	14066	0		6.20874
2376	Regions/clus5	728	14066	0		7.90864
2385	Regions/clus5	1448	14066	0		7.63888
2386	Regions/clus5	1528	14066	0		9.58164
2388	Regions/clus5	1688	14066	0		7.56486
2389	Regions/clus5	1768	14066	0		7.61276
2391	Regions/clus5	1928	14066	0		9.16798
2392	Regions/clus5	2008	14066	0		9.35757
2393	Regions/clus5	2088	14066	0		9.80548
2396	Regions/clus5	2328	14066	0		11.4385
2397	Regions/clus5	2408	14066	0		9.83054
2398	Regions/clus5	2488	14066	0		11.9112
2399	Regions/clus5	2568	14066	0		9.94349
2400	Regions/clus5	2648	14066	0		10.531
2401	Regions/clus5	2728	14066	0		11.1198
2402	Regions/clus5	2808	14066	0		10.1925
2454	Regions/clus5	6968	14066	0		10.1814
2455	Regions/clus5	7048	14066	0		10.1159
2456	Regions/clus5	7128	14066	0		9.1482
2457	Regions/clus5	7208	14066	0		11.1232
2468	Regions/clus5	8088	14066	0		7.37481
2488	Regions/clus5	648	13986	0		7.4928
2498	Regions/clus5	1448	13986	0		7.31772
2499	Regions/clus5	1528	13986	0		8.98952
2503	Regions/clus5	1848	13986	0		11.7923
2504	Regions/clus5	1928	13986	0		10.2524
2505	Regions/clus5	2008	13986	0		8.70369
2509	Regions/clus5	2328	13986	0		8.91508
2510	Regions/clus5	2408	13986	0		8.29542
2511	Regions/clus5	2488	13986	0		8.60512
2512	Regions/clus5	2568	13986	0		11.6405
2566	Regions/clus5	6888	13986	0		9.92234
2567	Regions/clus5	6968	13986	0		11.2877
2568	Regions/clus5	7048	13986	0		10.7432
2569	Regions/clus5	7128	13986	0		9.4011
2570	Regions/clus5	7208	13986	0		11.3512
2577	Regions/clus5	7768	13986	0		8.2692
2610	Regions/clus5	1288	13906	0		7.48936
2611	Regions/clus5	1368	13906	0		6.35845
2615	Regions/clus5	1688	13906	0		10.2295
2616	Regions/clus5	1768	13906	0		10.9273
2617	Regions/clus5	1848	13906	0		10.7031
2618	Regions/clus5	1928	13906	0		10.2443
2619	Regions/clus5	2008	13906	0		10.4969
2620	Regions/clus5	2088	13906	0		8.65023
2622	Regions/clus5	2248	13906	0		11.335
2623	Regions/clus5	2328	13906	0		8.61805
2627	Regions/clus5	2648	13906	0		9.4215
2676	Regions/clus5	6568	13906	0		7.97523
2678	Regions/clus5	6728	13906	0		9.48884
2680	Regions/clus5	6888	13906	0		10.6189
2681	Regions/clus5	6968	13906	0		10.4562
2682	Regions/clus5	7048	13906	0		10.6682
2683	Regions/clus5	7128	13906	0		12.4861
2687	Regions/clus5	7448	13906	0		10.5637
2690	Regions/clus5	7688	13906	0		7.74924
2725	Regions/clus5	1288	13826	0		7.94832
2730	Regions/clus5	1688	13826	0		11.237
2731	Regions/clus5	1768	13826	0		10.1188
2732	Regions/clus5	1848	13826	0		9.33967
2733	Regions/clus5	1928	13826	0		9.94251
2734	Regions/clus5	2008	13826	0		8.12123
2735	Regions/clus5	2088	13826	0		8.29951
2736	Regions/clus5	2168	13826	0		8.81288
2737	Regions/clus5	2248	13826	0		8.42499
2738	Regions/clus5	2328	13826	0		8.57227
2739	Regions/clus5	2408	13826	0		9.50056
2741	Regions/clus5	2568	13826	0		9.06914
2793	Regions/clus5	6728	13826	0		9.78264
2794	Regions/clus5	6808	13826	0		10.3517
2795	Regions/clus5	6888	13826	0		10.752
2796	Regions/clus5	6968	13826	0		11.5602
2797	Regions/clus5	7048	13826	0		10.7499
2798	Regions/clus5	7128	13826	0		11.0162
2800	Regions/clus5	7288	13826	0		10.2816
2801	Regions/clus5	7368	13826	0		12.3636
2832	Regions/clus5	648	13746	0		7.6804
2833	Regions/clus5	728	13746	0		5.42717
2839	Regions/clus5	1208	13746	0		7.47922
2845	Regions/clus5	1688	13746	0		11.2657
2846	Regions/clus5	1768	13746	0		10.4603
2847	Regions/clus5	1848	13746	0		11.0807
2848	Regions/clus5	1928	13746	0		11.5892
2849	Regions/clus5	2008	13746	0		10.6303
2850	Regions/clus5	2088	13746	0		10.729
2851	Regions/clus5	2168	13746	0		10.6005
2852	Regions/clus5	2248	13746	0		10.2423
2853	Regions/clus5	2328	13746	0		10.5973
2855	Regions/clus5	2488	13746	0		8.94696
2910	Regions/clus5	6888	13746	0		9.95179
2911	Regions/clus5	6968	13746	0		11.9408
2912	Regions/clus5	7048	13746	0		9.77872
2913	Regions/clus5	7128	13746	0		9.88242
2914	Regions/clus5	7208	13746	0		9.90683
2915	Regions/clus5	7288	13746	0		8.44937
2946	Regions/clus5	408	13666	0		349.356
2950	Regions/clus5	728	13666	0		4.52656
2962	Regions/clus5	1688	13666	0		9.1286
2963	Regions/clus5	1768	13666	0		9.48687
2964	Regions/clus5	1848	13666	0		12.1141
2965	Regions/clus5	1928	13666	0		10.4695
2966	Regions/clus5	2008	13666	0		10.7134
2967	Regions/clus5	2088	13666	0		12.3428
2968	Regions/clus5	2168	13666	0		12.9768
2971	Regions/clus5	2408	13666	0		10.5254
2974	Regions/clus5	2648	13666	0		7.58998
3024	Regions/clus5	6648	13666	0		7.6713
3027	Regions/clus5	6888	13666	0		8.83574
3028	Regions/clus5	6968	13666	0		10.9371
3029	Regions/clus5	7048	13666	0		9.6817
3030	Regions/clus5	7128	13666	0		10.4264
3031	Regions/clus5	7208	13666	0		9.77552
3033	Regions/clus5	7368	13666	0		9.64784
3066	Regions/clus5	648	13586	0		5.08144
3067	Regions/clus5	728	13586	0		4.52048
3073	Regions/clus5	1208	13586	0		6.36177
3076	Regions/clus5	1448	13586	0		8.14401
3079	Regions/clus5	1688	13586	0		10.4822
3080	Regions/clus5	1768	13586	0		10.3866
3081	Regions/clus5	1848	13586	0		10.8659
3082	Regions/clus5	1928	13586	0		11.8366
3083	Regions/clus5	2008	13586	0		12.9792
3084	Regions/clus5	2088	13586	0		11.1104
3085	Regions/clus5	2168	13586	0		11.5649
3086	Regions/clus5	2248	13586	0		10.5104
3087	Regions/clus5	2328	13586	0		8.75477
3088	Regions/clus5	2408	13586	0		8.75894
3090	Regions/clus5	2568	13586	0		10.7981
3092	Regions/clus5	2728	13586	0		15.6378
3146	Regions/clus5	7048	13586	0		9.21148
3147	Regions/clus5	7128	13586	0		9.5609
3148	Regions/clus5	7208	13586	0		10.061
3149	Regions/clus5	7288	13586	0		9.21686
3184	Regions/clus5	728	13506	0		6.80037
3194	Regions/clus5	1528	13506	0		8.80317
3195	Regions/clus5	1608	13506	0		9.61487
3196	Regions/clus5	1688	13506	0		7.07728
3197	Regions/clus5	1768	13506	0		9.07814
3198	Regions/clus5	1848	13506	0		12.9324
3199	Regions/clus5	1928	13506	0		13.1498
3200	Regions/clus5	2008	13506	0		10.4939
3201	Regions/clus5	2088	13506	0		11.6148
3202	Regions/clus5	2168	13506	0		11.7044
3203	Regions/clus5	2248	13506	0		8.83333
3204	Regions/clus5	2328	13506	0		9.81997
3205	Regions/clus5	2408	13506	0		9.09106
3206	Regions/clus5	2488	13506	0		7.37413
3207	Regions/clus5	2568	13506	0		9.61525
3263	Regions/clus5	7048	13506	0		9.93606
3264	Regions/clus5	7128	13506	0		9.22519
3271	Regions/clus5	7688	13506	0		7.82737
3301	Regions/clus5	648	13426	0		4.85937
3302	Regions/clus5	728	13426	0		4.38271
3307	Regions/clus5	1128	13426	0		6.94555
3313	Regions/clus5	1608	13426	0		10.4857
3314	Regions/clus5	1688	13426	0		9.90084
3315	Regions/clus5	1768	13426	0		12.186
3316	Regions/clus5	1848	13426	0		10.5181
3317	Regions/clus5	1928	13426	0		13.6729
3318	Regions/clus5	2008	13426	0		12.5592
3319	Regions/clus5	2088	13426	0		11.021
3320	Regions/clus5	2168	13426	0		12.3367
3321	Regions/clus5	2248	13426	0		11.7717
3322	Regions/clus5	2328	13426	0		10.1915
3324	Regions/clus5	2488	13426	0		7.98178
3378	Regions/clus5	6808	13426	0		7.8741
3380	Regions/clus5	6968	13426	0		9.83794
3381	Regions/clus5	7048	13426	0		9.93015
3382	Regions/clus5	7128	13426	0		9.00024
3419	Regions/clus5	648	13346	0		4.0738
3420	Regions/clus5	728	13346	0		5.54148
3432	Regions/clus5	1688	13346	0		10.0943
3433	Regions/clus5	1768	13346	0		10.1931
3434	Regions/clus5	1848	13346	0		12.7204
3435	Regions/clus5	1928	13346	0		10.8293
3436	Regions/clus5	2008	13346	0		11.0946
3438	Regions/clus5	2168	13346	0		10.5855
3439	Regions/clus5	2248	13346	0		10.7425
3441	Regions/clus5	2408	13346	0		7.39345
3442	Regions/clus5	2488	13346	0		9.72351
3498	Regions/clus5	6968	13346	0		9.19681
3499	Regions/clus5	7048	13346	0		12.6486
3500	Regions/clus5	7128	13346	0		8.80705
3501	Regions/clus5	7208	13346	0		10.0577
3551	Regions/clus5	1688	13266	0		12.3403
3552	Regions/clus5	1768	13266	0		14.1475
3553	Regions/clus5	1848	13266	0		11.3609
3554	Regions/clus5	1928	13266	0		10.6001
3555	Regions/clus5	2008	13266	0		11.7597
3556	Regions/clus5	2088	13266	0		13.0169
3557	Regions/clus5	2168	13266	0		10.7579
3558	Regions/clus5	2248	13266	0		10.5521
3562	Regions/clus5	2568	13266	0		9.93095
3614	Regions/clus5	6728	13266	0		7.23728
3617	Regions/clus5	6968	13266	0		9.40963
3618	Regions/clus5	7048	13266	0		10.0076
3619	Regions/clus5	7128	13266	0		10.7957
3620	Regions/clus5	7208	13266	0		9.99907
3657	Regions/clus5	568	13186	0		4.23653
3664	Regions/clus5	1128	13186	0		8.35458
3672	Regions/clus5	1768	13186	0		11.0975
3673	Regions/clus5	1848	13186	0		11.9704
3674	Regions/clus5	1928	13186	0		9.09339
3675	Regions/clus5	2008	13186	0		9.30826
3676	Regions/clus5	2088	13186	0		12.3102
3677	Regions/clus5	2168	13186	0		10.8962
3678	Regions/clus5	2248	13186	0		9.06492
3679	Regions/clus5	2328	13186	0		10.34
3681	Regions/clus5	2488	13186	0		8.10241
3736	Regions/clus5	6888	13186	0		8.12791
3737	Regions/clus5	6968	13186	0		8.70471
3738	Regions/clus5	7048	13186	0		11.5656
3739	Regions/clus5	7128	13186	0		8.78436
3778	Regions/clus5	648	13106	0		4.3223
3792	Regions/clus5	1768	13106	0		10.4709
3793	Regions/clus5	1848	13106	0		11.9752
3794	Regions/clus5	1928	13106	0		8.94944
3795	Regions/clus5	2008	13106	0		8.91478
3796	Regions/clus5	2088	13106	0		10.4271
3797	Regions/clus5	2168	13106	0		11.3156
3798	Regions/clus5	2248	13106	0		12.4406
3799	Regions/clus5	2328	13106	0		10.5424
3802	Regions/clus5	2568	13106	0		11.1123
3852	Regions/clus5	6568	13106	0		8.51719
3853	Regions/clus5	6648	13106	0		8.76045
3856	Regions/clus5	6888	13106	0		9.71487
3857	Regions/clus5	6968	13106	0		10.0753
3858	Regions/clus5	7048	13106	0		10.6458
3859	Regions/clus5	7128	13106	0		10.1825
3860	Regions/clus5	7208	13106	0		9.15227
3861	Regions/clus5	7288	13106	0		8.61005
3912	Regions/clus5	1768	13026	0		10.3731
3913	Regions/clus5	1848	13026	0		9.26815
3914	Regions/clus5	1928	13026	0		9.2067
3915	Regions/clus5	2008	13026	0		8.63433
3916	Regions/clus5	2088	13026	0		10.1679
3917	Regions/clus5	2168	13026	0		12.2592
3918	Regions/clus5	2248	13026	0		10.0622
3919	Regions/clus5	2328	13026	0		10.1373
3920	Regions/clus5	2408	13026	0		9.35595
3922	Regions/clus5	2568	13026	0		9.02334
3976	Regions/clus5	6888	13026	0		11.0147
3977	Regions/clus5	6968	13026	0		10.3573
3978	Regions/clus5	7048	13026	0		13.2914
3979	Regions/clus5	7128	13026	0		9.57582
4017	Regions/clus5	648	12946	0		3.95077
4032	Regions/clus5	1848	12946	0		9.09971
4033	Regions/clus5	1928	12946	0		10.7956
4034	Regions/clus5	2008	12946	0		7.79373
4035	Regions/clus5	2088	12946	0		8.28597
4036	Regions/clus5	2168	12946	0		9.44563
4037	Regions/clus5	2248	12946	0		9.6843
4038	Regions/clus5	2328	12946	0		9.9869
4039	Regions/clus5	2408	12946	0		7.19182
4040	Regions/clus5	2488	12946	0		9.79708
4041	Regions/clus5	2568	12946	0		8.77047
4093	Regions/clus5	6728	12946	0		7.47282
4094	Regions/clus5	6808	12946	0		10.0263
4095	Regions/clus5	6888	12946	0		10.9343
4096	Regions/clus5	6968	12946	0		9.77627
4097	Regions/clus5	7048	12946	0		9.33537
4098	Regions/clus5	7128	12946	0		8.21066
4099	Regions/clus5	7208	12946	0		9.94643
4151	Regions/clus5	1848	12866	0		8.84464
4152	Regions/clus5	1928	12866	0		10.0732
4153	Regions/clus5	2008	12866	0		8.58493
4154	Regions/clus5	2088	12866	0		9.12682
4156	Regions/clus5	2248	12866	0		8.39972
4157	Regions/clus5	2328	12866	0		8.06072
4158	Regions/clus5	2408	12866	0		9.6788
4159	Regions/clus5	2488	12866	0		8.47258
4160	Regions/clus5	2568	12866	0		7.89568
4161	Regions/clus5	2648	12866	0		10.1327
4163	Regions/clus5	2808	12866	0		8.90892
4207	Regions/clus5	6328	12866	0		10.2903
4210	Regions/clus5	6568	12866	0		10.4117
4213	Regions/clus5	6808	12866	0		9.13321
4214	Regions/clus5	6888	12866	0		9.17269
4216	Regions/clus5	7048	12866	0		8.18004
4217	Regions/clus5	7128	12866	0		10.0296
4218	Regions/clus5	7208	12866	0		9.86275
4271	Regions/clus5	1928	12786	0		9.62469
4272	Regions/clus5	2008	12786	0		9.6429
4273	Regions/clus5	2088	12786	0		6.95503
4274	Regions/clus5	2168	12786	0		7.83724
4275	Regions/clus5	2248	12786	0		6.82303
4276	Regions/clus5	2328	12786	0		10.7325
4277	Regions/clus5	2408	12786	0		10.1718
4278	Regions/clus5	2488	12786	0		9.79808
4279	Regions/clus5	2568	12786	0		9.50774
4280	Regions/clus5	2648	12786	0		8.65755
4281	Regions/clus5	2728	12786	0		9.84983
4328	Regions/clus5	6488	12786	0		8.70088
4330	Regions/clus5	6648	12786	0		7.36893
4331	Regions/clus5	6728	12786	0		7.53995
4332	Regions/clus5	6808	12786	0		10.3416
4333	Regions/clus5	6888	12786	0		8.96183
4334	Regions/clus5	6968	12786	0		8.91127
4335	Regions/clus5	7048	12786	0		8.02224
4391	Regions/clus5	2008	12706	0		8.75075
4392	Regions/clus5	2088	12706	0		8.06722
4393	Regions/clus5	2168	12706	0		6.24739
4394	Regions/clus5	2248	12706	0		8.24497
4395	Regions/clus5	2328	12706	0		6.93643
4396	Regions/clus5	2408	12706	0		8.27059
4397	Regions/clus5	2488	12706	0		9.80392
4398	Regions/clus5	2568	12706	0		11.053
4399	Regions/clus5	2648	12706	0		8.04887
4400	Regions/clus5	2728	12706	0		10.782
4441	Regions/clus5	6008	12706	0		6.78803
4442	Regions/clus5	6088	12706	0		6.91143
4445	Regions/clus5	6328	12706	0		8.75807
4448	Regions/clus5	6568	12706	0		7.39261
4449	Regions/clus5	6648	12706	0		8.58749
4450	Regions/clus5	6728	12706	0		7.48341
4453	Regions/clus5	6968	12706	0		9.40378
4511	Regions/clus5	2008	12626	0		7.64683
4512	Regions/clus5	2088	12626	0		7.58237
4513	Regions/clus5	2168	12626	0		7.83334
4514	Regions/clus5	2248	12626	0		8.63981
4515	Regions/clus5	2328	12626	0		8.6752
4516	Regions/clus5	2408	12626	0		9.46395
4517	Regions/clus5	2488	12626	0		8.4201
4518	Regions/clus5	2568	12626	0		9.21831
4519	Regions/clus5	2648	12626	0		9.82575
4520	Regions/clus5	2728	12626	0		8.54934
4568	Regions/clus5	6568	12626	0		7.79332
4569	Regions/clus5	6648	12626	0		9.07224
4570	Regions/clus5	6728	12626	0		6.99135
4572	Regions/clus5	6888	12626	0		9.40063
4613	Regions/clus5	648	12546	0		4.51882
4614	Regions/clus5	728	12546	0		4.71359
4632	Regions/clus5	2168	12546	0		7.81795
4633	Regions/clus5	2248	12546	0		7.38261
4634	Regions/clus5	2328	12546	0		8.59277
4635	Regions/clus5	2408	12546	0		7.95769
4636	Regions/clus5	2488	12546	0		9.45125
4637	Regions/clus5	2568	12546	0		9.24411
4638	Regions/clus5	2648	12546	0		10.8661
4639	Regions/clus5	2728	12546	0		9.69554
4640	Regions/clus5	2808	12546	0		6.37166
4649	Regions/clus5	3528	12546	0		6.71909
4685	Regions/clus5	6408	12546	0		9.02165
4686	Regions/clus5	6488	12546	0		8.98674
4687	Regions/clus5	6568	12546	0		8.15972
4727	Regions/clus5	248	12466	0		7.56899
4750	Regions/clus5	2088	12466	0		8.25373
4751	Regions/clus5	2168	12466	0		7.9714
4752	Regions/clus5	2248	12466	0		9.69141
4753	Regions/clus5	2328	12466	0		10.1901
4754	Regions/clus5	2408	12466	0		9.18521
4755	Regions/clus5	2488	12466	0		11.0928
4756	Regions/clus5	2568	12466	0		10.1341
4757	Regions/clus5	2648	12466	0		8.79863
4758	Regions/clus5	2728	12466	0		8.68687
4759	Regions/clus5	2808	12466	0		8.65654
4760	Regions/clus5	2888	12466	0		7.70132
4769	Regions/clus5	3608	12466	0		9.25473
4804	Regions/clus5	6408	12466	0		8.6797
4805	Regions/clus5	6488	12466	0		6.84916
4812	Regions/clus5	7048	12466	0		8.93338
4848	Regions/clus5	408	12386	0		7.93885
4851	Regions/clus5	648	12386	0		5.05704
4869	Regions/clus5	2088	12386	0		7.99734
4870	Regions/clus5	2168	12386	0		8.33485
4871	Regions/clus5	2248	12386	0		7.4047
4872	Regions/clus5	2328	12386	0		7.38212
4873	Regions/clus5	2408	12386	0		8.89799
4874	Regions/clus5	2488	12386	0		8.75318
4875	Regions/clus5	2568	12386	0		8.9601
4876	Regions/clus5	2648	12386	0		9.64721
4877	Regions/clus5	2728	12386	0		9.50124
4878	Regions/clus5	2808	12386	0		7.5958
4879	Regions/clus5	2888	12386	0		8.54605
4909	Regions/clus5	5288	12386	0		7.4734
4923	Regions/clus5	6408	12386	0		6.95492
4924	Regions/clus5	6488	12386	0		7.29055
4970	Regions/clus5	728	12306	0		4.56575
4989	Regions/clus5	2248	12306	0		8.55039
4990	Regions/clus5	2328	12306	0		7.97553
4991	Regions/clus5	2408	12306	0		9.59758
4992	Regions/clus5	2488	12306	0		8.57515
4993	Regions/clus5	2568	12306	0		7.67819
4994	Regions/clus5	2648	12306	0		7.21966
4995	Regions/clus5	2728	12306	0		8.18136
4996	Regions/clus5	2808	12306	0		6.78771
4998	Regions/clus5	2968	12306	0		5.99293
5005	Regions/clus5	3528	12306	0		4.79509
5013	Regions/clus5	4168	12306	0		7.11
5039	Regions/clus5	6248	12306	0		7.71436
5040	Regions/clus5	6328	12306	0		6.92031
5041	Regions/clus5	6408	12306	0		7.09615
5108	Regions/clus5	2328	12226	0		6.86506
5109	Regions/clus5	2408	12226	0		7.36708
5110	Regions/clus5	2488	12226	0		7.31208
5111	Regions/clus5	2568	12226	0		6.68058
5112	Regions/clus5	2648	12226	0		7.60077
5113	Regions/clus5	2728	12226	0		7.61711
5114	Regions/clus5	2808	12226	0		6.98788
5115	Regions/clus5	2888	12226	0		6.33158
5131	Regions/clus5	4168	12226	0		6.01576
5157	Regions/clus5	6248	12226	0		8.65972
5158	Regions/clus5	6328	12226	0		6.53854
5159	Regions/clus5	6408	12226	0		6.30456
5160	Regions/clus5	6488	12226	0		7.10936
5162	Regions/clus5	6648	12226	0		8.42092
5165	Regions/clus5	6888	12226	0		8.85683
5166	Regions/clus5	6968	12226	0		9.26551
5202	Regions/clus5	568	12146	0		4.62707
5226	Regions/clus5	2488	12146	0		7.32837
5227	Regions/clus5	2568	12146	0		8.55346
5228	Regions/clus5	2648	12146	0		7.66946
5229	Regions/clus5	2728	12146	0		8.13768
5230	Regions/clus5	2808	12146	0		6.70677
5231	Regions/clus5	2888	12146	0		6.66352
5272	Regions/clus5	6168	12146	0		7.19128
5274	Regions/clus5	6328	12146	0		7.83702
5275	Regions/clus5	6408	12146	0		6.74097
5276	Regions/clus5	6488	12146	0		7.71394
5279	Regions/clus5	6728	12146	0		7.80336
5280	Regions/clus5	6808	12146	0		8.83123
5281	Regions/clus5	6888	12146	0		9.27447
5318	Regions/clus5	568	12066	0		6.08402
5343	Regions/clus5	2568	12066	0		7.33271
5344	Regions/clus5	2648	12066	0		6.62667
5345	Regions/clus5	2728	12066	0		7.0677
5346	Regions/clus5	2808	12066	0		6.54289
5347	Regions/clus5	2888	12066	0		7.51517
5391	Regions/clus5	6408	12066	0		6.18984
5394	Regions/clus5	6648	12066	0		9.5524
5395	Regions/clus5	6728	12066	0		7.3138
5396	Regions/clus5	6808	12066	0		8.91092
5434	Regions/clus5	648	11986	0		5.50904
5459	Regions/clus5	2648	11986	0		6.91042
5460	Regions/clus5	2728	11986	0		6.33452
5461	Regions/clus5	2808	11986	0		6.78955
5462	Regions/clus5	2888	11986	0		7.12911
5463	Regions/clus5	2968	11986	0		8.66915
5464	Regions/clus5	3048	11986	0		7.49521
5504	Regions/clus5	6248	11986	0		8.1765
5506	Regions/clus5	6408	11986	0		6.77987
5507	Regions/clus5	6488	11986	0		6.36616
5508	Regions/clus5	6568	11986	0		7.15847
5509	Regions/clus5	6648	11986	0		7.2431
5510	Regions/clus5	6728	11986	0		8.03422
5511	Regions/clus5	6808	11986	0		7.29744
5547	Regions/clus5	488	11906	0		6.26556
5548	Regions/clus5	568	11906	0		6.33765
5576	Regions/clus5	2808	11906	0		8.48463
5577	Regions/clus5	2888	11906	0		7.73242
5578	Regions/clus5	2968	11906	0		8.14643
5579	Regions/clus5	3048	11906	0		7.06412
5617	Regions/clus5	6088	11906	0		6.91253
5620	Regions/clus5	6328	11906	0		8.12867
5621	Regions/clus5	6408	11906	0		8.2947
5622	Regions/clus5	6488	11906	0		7.19912
5623	Regions/clus5	6568	11906	0		7.68031
5624	Regions/clus5	6648	11906	0		7.09193
5625	Regions/clus5	6728	11906	0		6.96921
5662	Regions/clus5	568	11826	0		4.75316
5691	Regions/clus5	2888	11826	0		7.93696
5692	Regions/clus5	2968	11826	0		7.34115
5693	Regions/clus5	3048	11826	0		8.20459
5694	Regions/clus5	3128	11826	0		7.98114
5736	Regions/clus5	6488	11826	0		6.84294
5737	Regions/clus5	6568	11826	0		7.52041
5738	Regions/clus5	6648	11826	0		7.52635
5776	Regions/clus5	648	11746	0		4.7634
5805	Regions/clus5	2968	11746	0		6.34945
5806	Regions/clus5	3048	11746	0		8.28984
5807	Regions/clus5	3128	11746	0		6.26269
5808	Regions/clus5	3208	11746	0		5.76815
5848	Regions/clus5	6408	11746	0		6.94584
5849	Regions/clus5	6488	11746	0		6.55603
5850	Regions/clus5	6568	11746	0		6.81055
5918	Regions/clus5	3048	11666	0		6.67159
5919	Regions/clus5	3128	11666	0		6.54062
5920	Regions/clus5	3208	11666	0		6.53888
5921	Regions/clus5	3288	11666	0		7.21955
5960	Regions/clus5	6408	11666	0		6.27954
5961	Regions/clus5	6488	11666	0		6.66093
6031	Regions/clus5	3208	11586	0		7.3367
6032	Regions/clus5	3288	11586	0		6.35052
6071	Regions/clus5	6408	11586	0		6.50321
6141	Regions/clus5	3288	11506	0		6.41717
6142	Regions/clus5	3368	11506	0		7.26299
6878	Regions/clus5	31688	16946	0		4.89776
6909	Regions/clus5	31928	16866	0		3.42788
6941	Regions/clus5	31848	16786	0		8.40332
6946	Regions/clus5	26888	16706	0		4.33837
6981	Regions/clus5	32008	16706	0		42.2947
6982	Regions/clus5	32088	16706	0		297.733
6983	Regions/clus5	32168	16706	0		2.77945
6984	Regions/clus5	32248	16706	0		176.995
7029	Regions/clus5	32328	16626	0		528.828
7378	Regions/clus5	32888	16146	0		122.545
7634	Regions/clus5	28648	15826	0		13.9132
7714	Regions/clus5	28488	15746	0		16.2599
7729	Regions/clus5	30648	15746	0		14.0895
7816	Regions/clus5	30408	15666	0		13.0254
7817	Regions/clus5	30488	15666	0		13.3088
7818	Regions/clus5	30568	15666	0		15.5454
7819	Regions/clus5	30648	15666	0		16.6077
7820	Regions/clus5	30728	15666	0		14.8615
7821	Regions/clus5	30808	15666	0		15.2269
7890	Regions/clus5	28168	15586	0		16.4812
7891	Regions/clus5	28248	15586	0		17.4891
7894	Regions/clus5	28488	15586	0		16.5294
7897	Regions/clus5	28728	15586	0		13.3612
7899	Regions/clus5	28888	15586	0		14.3437
7902	Regions/clus5	29128	15586	0		17.3733
7912	Regions/clus5	30408	15586	0		13.681
7913	Regions/clus5	30488	15586	0		14.95
7914	Regions/clus5	30568	15586	0		14.6083
7915	Regions/clus5	30648	15586	0		14.2756
7916	Regions/clus5	30728	15586	0		14.8029
7917	Regions/clus5	30808	15586	0		15.928
7919	Regions/clus5	30968	15586	0		15.0862
7977	Regions/clus5	27288	15506	0		13.7433
7987	Regions/clus5	28088	15506	0		13.1935
7988	Regions/clus5	28168	15506	0		13.4368
7989	Regions/clus5	28248	15506	0		13.0683
7990	Regions/clus5	28328	15506	0		17.5956
7991	Regions/clus5	28408	15506	0		17.2222
7992	Regions/clus5	28488	15506	0		13.5364
7998	Regions/clus5	28968	15506	0		14.7983
7999	Regions/clus5	29048	15506	0		12.949
8006	Regions/clus5	29848	15506	0		6.89316
8010	Regions/clus5	30168	15506	0		9.78104
8018	Regions/clus5	30808	15506	0		15.8168
8019	Regions/clus5	30888	15506	0		15.9866
8023	Regions/clus5	31208	15506	0		14.1932
8024	Regions/clus5	31288	15506	0		14.756
8077	Regions/clus5	27048	15426	0		14.2626
8078	Regions/clus5	27128	15426	0		11.2027
8080	Regions/clus5	27288	15426	0		12.9048
8089	Regions/clus5	28008	15426	0		13.1337
8090	Regions/clus5	28088	15426	0		12.9041
8091	Regions/clus5	28168	15426	0		15.5897
8092	Regions/clus5	28248	15426	0		16.8332
8112	Regions/clus5	29848	15426	0		10.8865
8113	Regions/clus5	29928	15426	0		10.0545
8125	Regions/clus5	30888	15426	0		11.7713
8126	Regions/clus5	30968	15426	0		14.1387
8134	Regions/clus5	31608	15426	0		11.1279
8185	Regions/clus5	26968	15346	0		12.8509
8186	Regions/clus5	27048	15346	0		13.5676
8187	Regions/clus5	27128	15346	0		11.9061
8188	Regions/clus5	27208	15346	0		13.5368
8197	Regions/clus5	27928	15346	0		11.5857
8198	Regions/clus5	28008	15346	0		13.122
8199	Regions/clus5	28088	15346	0		14.068
8200	Regions/clus5	28168	15346	0		14.8471
8201	Regions/clus5	28248	15346	0		15.109
8202	Regions/clus5	28328	15346	0		15.2113
8203	Regions/clus5	28408	15346	0		17.1703
8211	Regions/clus5	29048	15346	0		13.7583
8212	Regions/clus5	29128	15346	0		12.6817
8213	Regions/clus5	29208	15346	0		15.8002
8214	Regions/clus5	29288	15346	0		15.1136
8215	Regions/clus5	29368	15346	0		14.7142
8216	Regions/clus5	29448	15346	0		17.2386
8217	Regions/clus5	29528	15346	0		12.3009
8218	Regions/clus5	29608	15346	0		14.2395
8220	Regions/clus5	29768	15346	0		14.1771
8221	Regions/clus5	29848	15346	0		13.6202
8222	Regions/clus5	29928	15346	0		11.549
8223	Regions/clus5	30008	15346	0		10.9954
8234	Regions/clus5	30888	15346	0		15.3132
8294	Regions/clus5	26808	15266	0		10.5921
8296	Regions/clus5	26968	15266	0		12.0396
8299	Regions/clus5	27208	15266	0		10.9074
8307	Regions/clus5	27848	15266	0		12.3722
8308	Regions/clus5	27928	15266	0		12.2659
8309	Regions/clus5	28008	15266	0		15.1525
8310	Regions/clus5	28088	15266	0		17.6798
8311	Regions/clus5	28168	15266	0		17.7554
8312	Regions/clus5	28248	15266	0		13.9584
8313	Regions/clus5	28328	15266	0		16.8539
8314	Regions/clus5	28408	15266	0		15.3206
8322	Regions/clus5	29048	15266	0		11.9437
8323	Regions/clus5	29128	15266	0		16.3458
8324	Regions/clus5	29208	15266	0		13.3047
8325	Regions/clus5	29288	15266	0		13.7592
8326	Regions/clus5	29368	15266	0		12.6197
8327	Regions/clus5	29448	15266	0		14.2581
8328	Regions/clus5	29528	15266	0		11.8327
8329	Regions/clus5	29608	15266	0		12.1989
8330	Regions/clus5	29688	15266	0		11.9888
8331	Regions/clus5	29768	15266	0		15.0083
8332	Regions/clus5	29848	15266	0		12.7828
8333	Regions/clus5	29928	15266	0		13.5189
8334	Regions/clus5	30008	15266	0		12.9121
8335	Regions/clus5	30088	15266	0		11.3663
8336	Regions/clus5	30168	15266	0		13.3672
8337	Regions/clus5	30248	15266	0		10.917
8345	Regions/clus5	30888	15266	0		11.2416
8406	Regions/clus5	26728	15186	0		10.3048
8411	Regions/clus5	27128	15186	0		12.6844
8412	Regions/clus5	27208	15186	0		12.0202
8419	Regions/clus5	27768	15186	0		11.7896
8420	Regions/clus5	27848	15186	0		12.2781
8421	Regions/clus5	27928	15186	0		13.3031
8422	Regions/clus5	28008	15186	0		16.3285
8423	Regions/clus5	28088	15186	0		15.6072
8424	Regions/clus5	28168	15186	0		18.3642
8425	Regions/clus5	28248	15186	0		12.8161
8426	Regions/clus5	28328	15186	0		14.2936
8427	Regions/clus5	28408	15186	0		16.0511
8428	Regions/clus5	28488	15186	0		16.5216
8429	Regions/clus5	28568	15186	0		13.0876
8430	Regions/clus5	28648	15186	0		12.2045
8431	Regions/clus5	28728	15186	0		10.9855
8437	Regions/clus5	29208	15186	0		11.6936
8438	Regions/clus5	29288	15186	0		10.6262
8439	Regions/clus5	29368	15186	0		12.8648
8440	Regions/clus5	29448	15186	0		10.5766
8441	Regions/clus5	29528	15186	0		12.3093
8442	Regions/clus5	29608	15186	0		10.324
8443	Regions/clus5	29688	15186	0		13.4075
8444	Regions/clus5	29768	15186	0		13.5752
8445	Regions/clus5	29848	15186	0		12.5409
8446	Regions/clus5	29928	15186	0		15.4066
8447	Regions/clus5	30008	15186	0		13.354
8448	Regions/clus5	30088	15186	0		16.6579
8449	Regions/clus5	30168	15186	0		12.2141
8450	Regions/clus5	30248	15186	0		13.4696
8451	Regions/clus5	30328	15186	0		11.271
8452	Regions/clus5	30408	15186	0		12.4514
8453	Regions/clus5	30488	15186	0		11.1101
8459	Regions/clus5	30968	15186	0		13.7469
8465	Regions/clus5	31448	15186	0		13.665
8518	Regions/clus5	26568	15106	0		9.33662
8527	Regions/clus5	27288	15106	0		12.6293
8533	Regions/clus5	27768	15106	0		12.2608
8534	Regions/clus5	27848	15106	0		14.6992
8535	Regions/clus5	27928	15106	0		16.4199
8536	Regions/clus5	28008	15106	0		15.0836
8537	Regions/clus5	28088	15106	0		15.0594
8538	Regions/clus5	28168	15106	0		16.3407
8539	Regions/clus5	28248	15106	0		14.0389
8540	Regions/clus5	28328	15106	0		13.7224
8541	Regions/clus5	28408	15106	0		13.0441
8542	Regions/clus5	28488	15106	0		13.9666
8543	Regions/clus5	28568	15106	0		15.2313
8557	Regions/clus5	29688	15106	0		12.419
8558	Regions/clus5	29768	15106	0		13.0999
8559	Regions/clus5	29848	15106	0		16.6956
8560	Regions/clus5	29928	15106	0		12.1045
8561	Regions/clus5	30008	15106	0		14.2844
8562	Regions/clus5	30088	15106	0		14.0949
8563	Regions/clus5	30168	15106	0		13.2361
8564	Regions/clus5	30248	15106	0		13.4296
8565	Regions/clus5	30328	15106	0		12.964
8566	Regions/clus5	30408	15106	0		11.0007
8567	Regions/clus5	30488	15106	0		11.0838
8568	Regions/clus5	30568	15106	0		11.2942
8569	Regions/clus5	30648	15106	0		10.6695
8574	Regions/clus5	31048	15106	0		13.6321
8642	Regions/clus5	27208	15026	0		12.9133
8647	Regions/clus5	27608	15026	0		12.2832
8648	Regions/clus5	27688	15026	0		12.8116
8649	Regions/clus5	27768	15026	0		15.9038
8650	Regions/clus5	27848	15026	0		15.6344
8651	Regions/clus5	27928	15026	0		15.2103
8652	Regions/clus5	28008	15026	0		14.7364
8653	Regions/clus5	28088	15026	0		13.8229
8654	Regions/clus5	28168	15026	0		14.9838
8655	Regions/clus5	28248	15026	0		15.3758
8656	Regions/clus5	28328	15026	0		13.54
8657	Regions/clus5	28408	15026	0		14.4208
8658	Regions/clus5	28488	15026	0		12.9189
8674	Regions/clus5	29768	15026	0		10.3595
8675	Regions/clus5	29848	15026	0		13.0554
8676	Regions/clus5	29928	15026	0		13.5537
8677	Regions/clus5	30008	15026	0		13.3522
8678	Regions/clus5	30088	15026	0		13.5957
8679	Regions/clus5	30168	15026	0		14.04
8680	Regions/clus5	30248	15026	0		10.6806
8681	Regions/clus5	30328	15026	0		11.9622
8682	Regions/clus5	30408	15026	0		13.6458
8683	Regions/clus5	30488	15026	0		12.4685
8684	Regions/clus5	30568	15026	0		10.944
8685	Regions/clus5	30648	15026	0		8.53257
8689	Regions/clus5	30968	15026	0		11.0929
8764	Regions/clus5	27608	14946	0		13.498
8765	Regions/clus5	27688	14946	0		14.8683
8766	Regions/clus5	27768	14946	0		13.7248
8767	Regions/clus5	27848	14946	0		13.1533
8768	Regions/clus5	27928	14946	0		16.9479
8769	Regions/clus5	28008	14946	0		13.8371
8770	Regions/clus5	28088	14946	0		13.671
8796	Regions/clus5	30168	14946	0		11.2833
8797	Regions/clus5	30248	14946	0		12.0407
8798	Regions/clus5	30328	14946	0		10.1536
8799	Regions/clus5	30408	14946	0		10.774
8800	Regions/clus5	30488	14946	0		13.6448
8801	Regions/clus5	30568	14946	0		10.1676
8802	Regions/clus5	30648	14946	0		10.3761
8803	Regions/clus5	30728	14946	0		9.87671
8806	Regions/clus5	30968	14946	0		11.3757
8807	Regions/clus5	31048	14946	0		12.7499
8881	Regions/clus5	27528	14866	0		12.368
8882	Regions/clus5	27608	14866	0		11.6199
8883	Regions/clus5	27688	14866	0		11.3205
8884	Regions/clus5	27768	14866	0		14.2549
8885	Regions/clus5	27848	14866	0		16.2469
8886	Regions/clus5	27928	14866	0		12.3738
8887	Regions/clus5	28008	14866	0		13.0499
8897	Regions/clus5	28808	14866	0		10.702
8898	Regions/clus5	28888	14866	0		9.40426
8899	Regions/clus5	28968	14866	0		10.2748
8907	Regions/clus5	29608	14866	0		9.26392
8916	Regions/clus5	30328	14866	0		9.26531
8917	Regions/clus5	30408	14866	0		10.9951
8918	Regions/clus5	30488	14866	0		11.9366
8919	Regions/clus5	30568	14866	0		10.7272
8920	Regions/clus5	30648	14866	0		10.1511
8921	Regions/clus5	30728	14866	0		8.44642
8922	Regions/clus5	30808	14866	0		8.92135
8924	Regions/clus5	30968	14866	0		11.0573
8925	Regions/clus5	31048	14866	0		11.1197
8991	Regions/clus5	26888	14786	0		9.7928
8998	Regions/clus5	27448	14786	0		9.73152
8999	Regions/clus5	27528	14786	0		14.7193
9000	Regions/clus5	27608	14786	0		15.4545
9001	Regions/clus5	27688	14786	0		14.8838
9002	Regions/clus5	27768	14786	0		14.1957
9003	Regions/clus5	27848	14786	0		14.6257
9015	Regions/clus5	28808	14786	0		10.2609
9016	Regions/clus5	28888	14786	0		10.7389
9017	Regions/clus5	28968	14786	0		9.58486
9025	Regions/clus5	29608	14786	0		8.85315
9026	Regions/clus5	29688	14786	0		9.28602
9027	Regions/clus5	29768	14786	0		9.51173
9036	Regions/clus5	30488	14786	0		9.24659
9037	Regions/clus5	30568	14786	0		9.95354
9038	Regions/clus5	30648	14786	0		9.12914
9039	Regions/clus5	30728	14786	0		10.3253
9040	Regions/clus5	30808	14786	0		10.5219
9043	Regions/clus5	31048	14786	0		11.0809
9044	Regions/clus5	31128	14786	0		12.2489
9110	Regions/clus5	26888	14706	0		12.123
9112	Regions/clus5	27048	14706	0		11.4905
9118	Regions/clus5	27528	14706	0		11.5033
9119	Regions/clus5	27608	14706	0		14.0727
9120	Regions/clus5	27688	14706	0		14.0989
9121	Regions/clus5	27768	14706	0		12.9054
9135	Regions/clus5	28888	14706	0		10.2127
9144	Regions/clus5	29608	14706	0		9.53318
9145	Regions/clus5	29688	14706	0		8.28783
9146	Regions/clus5	29768	14706	0		10.1323
9162	Regions/clus5	31048	14706	0		9.63831
9163	Regions/clus5	31128	14706	0		11.2434
9164	Regions/clus5	31208	14706	0		14.581
9165	Regions/clus5	31288	14706	0		10.1597
9229	Regions/clus5	26888	14626	0		10.0606
9231	Regions/clus5	27048	14626	0		10.8309
9241	Regions/clus5	27848	14626	0		11.9223
9253	Regions/clus5	28808	14626	0		8.34676
9264	Regions/clus5	29688	14626	0		8.92484
9265	Regions/clus5	29768	14626	0		10.2648
9281	Regions/clus5	31048	14626	0		9.35649
9282	Regions/clus5	31128	14626	0		12.2465
9283	Regions/clus5	31208	14626	0		13.8417
9347	Regions/clus5	26808	14546	0		9.20019
9348	Regions/clus5	26888	14546	0		12.5245
9349	Regions/clus5	26968	14546	0		9.68325
9350	Regions/clus5	27048	14546	0		12.4278
9351	Regions/clus5	27128	14546	0		11.5555
9355	Regions/clus5	27448	14546	0		12.9977
9400	Regions/clus5	31048	14546	0		10.8869
9401	Regions/clus5	31128	14546	0		11.0594
9402	Regions/clus5	31208	14546	0		10.9544
9466	Regions/clus5	26808	14466	0		10.2988
9467	Regions/clus5	26888	14466	0		9.31098
9468	Regions/clus5	26968	14466	0		14.2715
9469	Regions/clus5	27048	14466	0		12.9141
9470	Regions/clus5	27128	14466	0		10.1252
9471	Regions/clus5	27208	14466	0		9.63082
9472	Regions/clus5	27288	14466	0		11.7582
9474	Regions/clus5	27448	14466	0		14.0887
9476	Regions/clus5	27608	14466	0		13.1988
9517	Regions/clus5	30888	14466	0		10.9164
9518	Regions/clus5	30968	14466	0		10.1205
9519	Regions/clus5	31048	14466	0		8.57673
9520	Regions/clus5	31128	14466	0		10.8919
9521	Regions/clus5	31208	14466	0		9.80191
9522	Regions/clus5	31288	14466	0		12.1542
9587	Regions/clus5	26808	14386	0		11.1374
9588	Regions/clus5	26888	14386	0		10.4457
9589	Regions/clus5	26968	14386	0		14.3436
9590	Regions/clus5	27048	14386	0		15.9284
9591	Regions/clus5	27128	14386	0		12.4875
9592	Regions/clus5	27208	14386	0		11.9455
9593	Regions/clus5	27288	14386	0		13.3383
9594	Regions/clus5	27368	14386	0		11.7078
9595	Regions/clus5	27448	14386	0		12.4158
9596	Regions/clus5	27528	14386	0		12.3483
9636	Regions/clus5	30728	14386	0		10.2439
9639	Regions/clus5	30968	14386	0		10.7284
9640	Regions/clus5	31048	14386	0		9.86033
9641	Regions/clus5	31128	14386	0		10.7545
9642	Regions/clus5	31208	14386	0		12.2219
9643	Regions/clus5	31288	14386	0		9.91468
9644	Regions/clus5	31368	14386	0		12.8663
9709	Regions/clus5	26888	14306	0		11.6316
9710	Regions/clus5	26968	14306	0		10.3436
9711	Regions/clus5	27048	14306	0		10.2965
9712	Regions/clus5	27128	14306	0		12.6902
9713	Regions/clus5	27208	14306	0		11.4856
9714	Regions/clus5	27288	14306	0		12.532
9715	Regions/clus5	27368	14306	0		11.6105
9761	Regions/clus5	31048	14306	0		12.4224
9762	Regions/clus5	31128	14306	0		11.3365
9763	Regions/clus5	31208	14306	0		11.5506
9764	Regions/clus5	31288	14306	0		9.86454
9828	Regions/clus5	26728	14226	0		10.8384
9830	Regions/clus5	26888	14226	0		11.6566
9831	Regions/clus5	26968	14226	0		10.3083
9832	Regions/clus5	27048	14226	0		10.3827
9833	Regions/clus5	27128	14226	0		10.8237
9834	Regions/clus5	27208	14226	0		11.078
9882	Regions/clus5	31048	14226	0		10.9524
9883	Regions/clus5	31128	14226	0		10.6503
9884	Regions/clus5	31208	14226	0		10.0188
9885	Regions/clus5	31288	14226	0		9.25211
9952	Regions/clus5	26888	14146	0		13.5279
9953	Regions/clus5	26968	14146	0		9.86502
9954	Regions/clus5	27048	14146	0		9.86824
9955	Regions/clus5	27128	14146	0		13.08
10004	Regions/clus5	31048	14146	0		11.46
10005	Regions/clus5	31128	14146	0		8.73674
10006	Regions/clus5	31208	14146	0		10.6989
10007	Regions/clus5	31288	14146	0		12.0827
10075	Regions/clus5	26968	14066	0		10.3935
10076	Regions/clus5	27048	14066	0		9.62308
10077	Regions/clus5	27128	14066	0		8.65177
10078	Regions/clus5	27208	14066	0		9.0809
10126	Regions/clus5	31048	14066	0		10.4622
10127	Regions/clus5	31128	14066	0		10.6628
10128	Regions/clus5	31208	14066	0		11.1449
10129	Regions/clus5	31288	14066	0		10.8906
10199	Regions/clus5	27048	13986	0		12.1168
10200	Regions/clus5	27128	13986	0		10.447
10201	Regions/clus5	27208	13986	0		10.6741
10202	Regions/clus5	27288	13986	0		12.9522
10249	Regions/clus5	31048	13986	0		9.66994
10250	Regions/clus5	31128	13986	0		11.3079
10251	Regions/clus5	31208	13986	0		9.48824
10252	Regions/clus5	31288	13986	0		11.2787
10322	Regions/clus5	27048	13906	0		10.5103
10323	Regions/clus5	27128	13906	0		13.394
10324	Regions/clus5	27208	13906	0		11.2936
10327	Regions/clus5	27448	13906	0		10.5373
10372	Regions/clus5	31048	13906	0		10.2813
10373	Regions/clus5	31128	13906	0		10.9562
10374	Regions/clus5	31208	13906	0		11.138
10375	Regions/clus5	31288	13906	0		12.255
10376	Regions/clus5	31368	13906	0		9.89251
10446	Regions/clus5	27048	13826	0		11.5738
10447	Regions/clus5	27128	13826	0		10.9471
10448	Regions/clus5	27208	13826	0		12.2025
10449	Regions/clus5	27288	13826	0		11.1041
10496	Regions/clus5	31048	13826	0		12.1901
10497	Regions/clus5	31128	13826	0		10.8438
10498	Regions/clus5	31208	13826	0		12.4173
10499	Regions/clus5	31288	13826	0		12.3234
10571	Regions/clus5	27128	13746	0		9.96954
10572	Regions/clus5	27208	13746	0		12.1388
10573	Regions/clus5	27288	13746	0		12.6589
10574	Regions/clus5	27368	13746	0		13.4274
10619	Regions/clus5	30968	13746	0		8.99513
10620	Regions/clus5	31048	13746	0		11.1516
10621	Regions/clus5	31128	13746	0		11.7113
10622	Regions/clus5	31208	13746	0		9.93284
10623	Regions/clus5	31288	13746	0		13.1948
10694	Regions/clus5	27128	13666	0		10.6873
10695	Regions/clus5	27208	13666	0		10.9929
10696	Regions/clus5	27288	13666	0		12.0282
10697	Regions/clus5	27368	13666	0		11.6283
10742	Regions/clus5	30968	13666	0		10.4441
10743	Regions/clus5	31048	13666	0		12.2924
10744	Regions/clus5	31128	13666	0		12.379
10745	Regions/clus5	31208	13666	0		9.70027
10815	Regions/clus5	27048	13586	0		11.3366
10817	Regions/clus5	27208	13586	0		11.7934
10818	Regions/clus5	27288	13586	0		12.1402
10819	Regions/clus5	27368	13586	0		12.0992
10864	Regions/clus5	30968	13586	0		12.2486
10865	Regions/clus5	31048	13586	0		9.8395
10866	Regions/clus5	31128	13586	0		9.2143
10867	Regions/clus5	31208	13586	0		10.0596
10868	Regions/clus5	31288	13586	0		11.1196
10869	Regions/clus5	31368	13586	0		7.96507
10938	Regions/clus5	27128	13506	0		11.23
10939	Regions/clus5	27208	13506	0		11.6902
10940	Regions/clus5	27288	13506	0		11.8081
10941	Regions/clus5	27368	13506	0		11.8919
10943	Regions/clus5	27528	13506	0		13.7716
10987	Regions/clus5	31048	13506	0		9.64271
10988	Regions/clus5	31128	13506	0		10.7563
10989	Regions/clus5	31208	13506	0		9.39743
10992	Regions/clus5	31448	13506	0		7.57048
11059	Regions/clus5	27128	13426	0		9.89098
11061	Regions/clus5	27288	13426	0		9.8892
11062	Regions/clus5	27368	13426	0		13.0878
11064	Regions/clus5	27528	13426	0		11.9304
11065	Regions/clus5	27608	13426	0		16.0445
11066	Regions/clus5	27688	13426	0		14.8436
11070	Regions/clus5	28008	13426	0		13.6943
11108	Regions/clus5	31048	13426	0		8.19701
11109	Regions/clus5	31128	13426	0		9.95955
11110	Regions/clus5	31208	13426	0		8.9788
11111	Regions/clus5	31288	13426	0		8.42151
11180	Regions/clus5	27208	13346	0		8.91821
11181	Regions/clus5	27288	13346	0		11.6554
11182	Regions/clus5	27368	13346	0		9.49465
11183	Regions/clus5	27448	13346	0		13.1493
11184	Regions/clus5	27528	13346	0		13.0049
11185	Regions/clus5	27608	13346	0		13.6955
11186	Regions/clus5	27688	13346	0		21.2961
11221	Regions/clus5	30488	13346	0		10.1697
11226	Regions/clus5	30888	13346	0		7.886
11227	Regions/clus5	30968	13346	0		8.96738
11228	Regions/clus5	31048	13346	0		8.74943
11229	Regions/clus5	31128	13346	0		8.34119
11232	Regions/clus5	31368	13346	0		9.34177
11299	Regions/clus5	27208	13266	0		8.95467
11300	Regions/clus5	27288	13266	0		10.8713
11302	Regions/clus5	27448	13266	0		11.9808
11303	Regions/clus5	27528	13266	0		12.7886
11304	Regions/clus5	27608	13266	0		16.1946
11305	Regions/clus5	27688	13266	0		14.0089
11306	Regions/clus5	27768	13266	0		14.6071
11344	Regions/clus5	30808	13266	0		9.67738
11345	Regions/clus5	30888	13266	0		8.6162
11346	Regions/clus5	30968	13266	0		9.21436
11347	Regions/clus5	31048	13266	0		8.86858
11348	Regions/clus5	31128	13266	0		8.40293
11424	Regions/clus5	27688	13186	0		13.5697
11425	Regions/clus5	27768	13186	0		12.1379
11426	Regions/clus5	27848	13186	0		10.2515
11463	Regions/clus5	30808	13186	0		7.57696
11468	Regions/clus5	31208	13186	0		7.61007
11539	Regions/clus5	27448	13106	0		10.6325
11540	Regions/clus5	27528	13106	0		11.4673
11544	Regions/clus5	27848	13106	0		9.76381
12502	Regions/clus5	31128	12466	0		8.65495
12568	Regions/clus5	27528	12386	0		7.18094
12569	Regions/clus5	27608	12386	0		5.85656
12612	Regions/clus5	31048	12386	0		8.9619
12613	Regions/clus5	31128	12386	0		9.14302
12678	Regions/clus5	27528	12306	0		7.15809
12679	Regions/clus5	27608	12306	0		7.43662
12680	Regions/clus5	27688	12306	0		6.40952
12721	Regions/clus5	30968	12306	0		8.88606
12722	Regions/clus5	31048	12306	0		9.332
12723	Regions/clus5	31128	12306	0		7.31092
12787	Regions/clus5	27528	12226	0		7.95629
12788	Regions/clus5	27608	12226	0		7.36531
12789	Regions/clus5	27688	12226	0		8.19463
12790	Regions/clus5	27768	12226	0		8.26925
12830	Regions/clus5	30968	12226	0		9.88325
12831	Regions/clus5	31048	12226	0		8.87433
12832	Regions/clus5	31128	12226	0		8.47198
12896	Regions/clus5	27608	12146	0		7.11186
12897	Regions/clus5	27688	12146	0		9.69736
12898	Regions/clus5	27768	12146	0		7.73469
12938	Regions/clus5	30968	12146	0		8.05661
12939	Regions/clus5	31048	12146	0		8.26243
12940	Regions/clus5	31128	12146	0		10.0527
13003	Regions/clus5	27608	12066	0		7.11793
13004	Regions/clus5	27688	12066	0		8.92889
13005	Regions/clus5	27768	12066	0		7.75175
13006	Regions/clus5	27848	12066	0		7.98094
13044	Regions/clus5	30888	12066	0		8.24867
13045	Regions/clus5	30968	12066	0		7.86762
13046	Regions/clus5	31048	12066	0		8.12943
13047	Regions/clus5	31128	12066	0		11.2741
13109	Regions/clus5	27608	11986	0		8.64652
13110	Regions/clus5	27688	11986	0		8.98206
13111	Regions/clus5	27768	11986	0		9.593
13112	Regions/clus5	27848	11986	0		8.11989
13148	Regions/clus5	30728	11986	0		8.40453
13149	Regions/clus5	30808	11986	0		9.18954
13150	Regions/clus5	30888	11986	0		11.8681
13152	Regions/clus5	31048	11986	0		11.3681
13153	Regions/clus5	31128	11986	0		8.48954
13214	Regions/clus5	27608	11906	0		7.84864
13215	Regions/clus5	27688	11906	0		8.74379
13216	Regions/clus5	27768	11906	0		8.54821
13217	Regions/clus5	27848	11906	0		6.08813
13218	Regions/clus5	27928	11906	0		8.0532
13246	Regions/clus5	30168	11906	0		8.35805
13247	Regions/clus5	30248	11906	0		8.32991
13248	Regions/clus5	30328	11906	0		9.60593
13249	Regions/clus5	30408	11906	0		9.95443
13250	Regions/clus5	30488	11906	0		9.61077
13251	Regions/clus5	30568	11906	0		11.7783
13252	Regions/clus5	30648	11906	0		8.6381
13319	Regions/clus5	27688	11826	0		7.05106
13320	Regions/clus5	27768	11826	0		7.58143
13321	Regions/clus5	27848	11826	0		7.00909
13322	Regions/clus5	27928	11826	0		7.75197
13323	Regions/clus5	28008	11826	0		9.14185
13346	Regions/clus5	29848	11826	0		8.18983
13347	Regions/clus5	29928	11826	0		9.5907
13348	Regions/clus5	30008	11826	0		8.34024
13349	Regions/clus5	30088	11826	0		7.14453
13350	Regions/clus5	30168	11826	0		11.2658
13351	Regions/clus5	30248	11826	0		8.34735
13423	Regions/clus5	27768	11746	0		9.28949
13424	Regions/clus5	27848	11746	0		10.1249
13425	Regions/clus5	27928	11746	0		10.9569
13427	Regions/clus5	28088	11746	0		9.67471
13428	Regions/clus5	28168	11746	0		9.31391
13429	Regions/clus5	28248	11746	0		8.85475
13430	Regions/clus5	28328	11746	0		8.81782
13431	Regions/clus5	28408	11746	0		8.00538
13432	Regions/clus5	28488	11746	0		8.81075
13433	Regions/clus5	28568	11746	0		9.99354
13434	Regions/clus5	28648	11746	0		9.15282
13435	Regions/clus5	28728	11746	0		8.95434
13445	Regions/clus5	29528	11746	0		10.0899
13446	Regions/clus5	29608	11746	0		10.7997
13447	Regions/clus5	29688	11746	0		11.2829
13448	Regions/clus5	29768	11746	0		8.33258
13572	Regions/clus5	15768	17506	0		5.29085
13576	Regions/clus5	17928	17506	0		5.0766
13598	Regions/clus5	17768	17426	0		4.88518
13712	Regions/clus5	14568	17186	0		3.47128
14686	Regions/clus5	16088	16306	0		10.1765
14784	Regions/clus5	16088	16226	0		11.2956
14785	Regions/clus5	16168	16226	0		8.79365
14878	Regions/clus5	15688	16146	0		9.72635
14880	Regions/clus5	15848	16146	0		8.71364
14881	Regions/clus5	15928	16146	0		10.6486
14882	Regions/clus5	16008	16146	0		10.8157
14921	Regions/clus5	19128	16146	0		10.7322
14976	Regions/clus5	15528	16066	0		8.65753
14978	Regions/clus5	15688	16066	0		10.2392
14979	Regions/clus5	15768	16066	0		9.74813
14980	Regions/clus5	15848	16066	0		9.75289
15001	Regions/clus5	17528	16066	0		10.4069
15019	Regions/clus5	18968	16066	0		9.1467
15021	Regions/clus5	19128	16066	0		10.5048
15022	Regions/clus5	19208	16066	0		10.2771
15023	Regions/clus5	19288	16066	0		10.4352
15024	Regions/clus5	19368	16066	0		10.7333
15075	Regions/clus5	15288	15986	0		8.96481
15077	Regions/clus5	15448	15986	0		9.7503
15078	Regions/clus5	15528	15986	0		8.24544
15079	Regions/clus5	15608	15986	0		8.8471
15080	Regions/clus5	15688	15986	0		7.69296
15081	Regions/clus5	15768	15986	0		9.87239
15084	Regions/clus5	16008	15986	0		11.5841
15101	Regions/clus5	17368	15986	0		11.5261
15102	Regions/clus5	17448	15986	0		11.5868
15104	Regions/clus5	17608	15986	0		13.2529
15105	Regions/clus5	17688	15986	0		11.7014
15126	Regions/clus5	19368	15986	0		9.36945
15127	Regions/clus5	19448	15986	0		11.5741
15129	Regions/clus5	19608	15986	0		8.61686
15130	Regions/clus5	19688	15986	0		7.4744
15180	Regions/clus5	15528	15906	0		8.35618
15181	Regions/clus5	15608	15906	0		9.16104
15186	Regions/clus5	16008	15906	0		10.5022
15221	Regions/clus5	18808	15906	0		10.3136
15222	Regions/clus5	18888	15906	0		8.75254
15228	Regions/clus5	19368	15906	0		7.79831
15230	Regions/clus5	19528	15906	0		6.90177
15231	Regions/clus5	19608	15906	0		8.99499
15233	Regions/clus5	19768	15906	0		8.6292
15278	Regions/clus5	15128	15826	0		10.4225
15280	Regions/clus5	15288	15826	0		9.42011
15281	Regions/clus5	15368	15826	0		9.50643
15282	Regions/clus5	15448	15826	0		9.95527
15289	Regions/clus5	16008	15826	0		8.43813
15290	Regions/clus5	16088	15826	0		10.9041
15308	Regions/clus5	17528	15826	0		7.63508
15333	Regions/clus5	19528	15826	0		9.72908
15334	Regions/clus5	19608	15826	0		10.9434
15335	Regions/clus5	19688	15826	0		8.59229
15336	Regions/clus5	19768	15826	0		8.49503
15337	Regions/clus5	19848	15826	0		9.02136
15338	Regions/clus5	19928	15826	0		8.43313
15382	Regions/clus5	15048	15746	0		8.88228
15384	Regions/clus5	15208	15746	0		10.0769
15385	Regions/clus5	15288	15746	0		10.9442
15386	Regions/clus5	15368	15746	0		9.68337
15395	Regions/clus5	16088	15746	0		9.23679
15413	Regions/clus5	17528	15746	0		10.2955
15426	Regions/clus5	18568	15746	0		8.40809
15427	Regions/clus5	18648	15746	0		9.30034
15428	Regions/clus5	18728	15746	0		8.42163
15429	Regions/clus5	18808	15746	0		9.3888
15438	Regions/clus5	19528	15746	0		10.4256
15439	Regions/clus5	19608	15746	0		9.86717
15440	Regions/clus5	19688	15746	0		10.5054
15441	Regions/clus5	19768	15746	0		9.12785
15443	Regions/clus5	19928	15746	0		8.64691
15444	Regions/clus5	20008	15746	0		9.29565
15485	Regions/clus5	14888	15666	0		8.03079
15486	Regions/clus5	14968	15666	0		9.50726
15487	Regions/clus5	15048	15666	0		9.78075
15491	Regions/clus5	15368	15666	0		10.4306
15501	Regions/clus5	16168	15666	0		10.0588
15502	Regions/clus5	16248	15666	0		12.1361
15503	Regions/clus5	16328	15666	0		11.8532
15529	Regions/clus5	18408	15666	0		9.73535
15530	Regions/clus5	18488	15666	0		8.68694
15531	Regions/clus5	18568	15666	0		7.0277
15532	Regions/clus5	18648	15666	0		10.0472
15533	Regions/clus5	18728	15666	0		9.6441
15550	Regions/clus5	20088	15666	0		7.94411
15589	Regions/clus5	14728	15586	0		8.08886
15590	Regions/clus5	14808	15586	0		7.72405
15591	Regions/clus5	14888	15586	0		9.05421
15592	Regions/clus5	14968	15586	0		9.42885
15594	Regions/clus5	15128	15586	0		10.1327
15597	Regions/clus5	15368	15586	0		9.27161
15598	Regions/clus5	15448	15586	0		8.60244
15607	Regions/clus5	16168	15586	0		12.3246
15608	Regions/clus5	16248	15586	0		11.9252
15609	Regions/clus5	16328	15586	0		10.0261
15611	Regions/clus5	16488	15586	0		10.9077
15623	Regions/clus5	17448	15586	0		8.37604
15629	Regions/clus5	17928	15586	0		10.0103
15631	Regions/clus5	18088	15586	0		8.60042
15632	Regions/clus5	18168	15586	0		9.33867
15633	Regions/clus5	18248	15586	0		10.9725
15634	Regions/clus5	18328	15586	0		8.30855
15635	Regions/clus5	18408	15586	0		9.71291
15636	Regions/clus5	18488	15586	0		9.48672
15637	Regions/clus5	18568	15586	0		7.97978
15638	Regions/clus5	18648	15586	0		10.2519
15639	Regions/clus5	18728	15586	0		9.5416
15640	Regions/clus5	18808	15586	0		8.41895
15649	Regions/clus5	19528	15586	0		10.0802
15696	Regions/clus5	14728	15506	0		7.85223
15697	Regions/clus5	14808	15506	0		8.10222
15704	Regions/clus5	15368	15506	0		7.03424
15705	Regions/clus5	15448	15506	0		9.13686
15706	Regions/clus5	15528	15506	0		7.92729
15714	Regions/clus5	16168	15506	0		10.8833
15715	Regions/clus5	16248	15506	0		10.7904
15716	Regions/clus5	16328	15506	0		11.937
15717	Regions/clus5	16408	15506	0		10.4164
15719	Regions/clus5	16568	15506	0		11.5482
15721	Regions/clus5	16728	15506	0		10.3388
15722	Regions/clus5	16808	15506	0		9.3648
15723	Regions/clus5	16888	15506	0		9.18788
15725	Regions/clus5	17048	15506	0		10.8637
15735	Regions/clus5	17848	15506	0		8.09159
15736	Regions/clus5	17928	15506	0		8.75066
15737	Regions/clus5	18008	15506	0		8.00065
15738	Regions/clus5	18088	15506	0		10.642
15739	Regions/clus5	18168	15506	0		9.04019
15740	Regions/clus5	18248	15506	0		8.09181
15741	Regions/clus5	18328	15506	0		10.3614
15742	Regions/clus5	18408	15506	0		9.38596
15743	Regions/clus5	18488	15506	0		8.75501
15744	Regions/clus5	18568	15506	0		9.74556
15745	Regions/clus5	18648	15506	0		8.88849
15746	Regions/clus5	18728	15506	0		10.2099
15747	Regions/clus5	18808	15506	0		10.0411
15748	Regions/clus5	18888	15506	0		9.16559
15754	Regions/clus5	19368	15506	0		8.40085
15802	Regions/clus5	14568	15426	0		7.88565
15803	Regions/clus5	14648	15426	0		8.44098
15812	Regions/clus5	15368	15426	0		8.57216
15821	Regions/clus5	16088	15426	0		10.6682
15822	Regions/clus5	16168	15426	0		12.5287
15823	Regions/clus5	16248	15426	0		9.71357
15824	Regions/clus5	16328	15426	0		9.71496
15825	Regions/clus5	16408	15426	0		10.1248
15826	Regions/clus5	16488	15426	0		9.78984
15827	Regions/clus5	16568	15426	0		9.37475
15828	Regions/clus5	16648	15426	0		7.76908
15829	Regions/clus5	16728	15426	0		8.20004
15830	Regions/clus5	16808	15426	0		9.6492
15831	Regions/clus5	16888	15426	0		10.0552
15832	Regions/clus5	16968	15426	0		8.66516
15833	Regions/clus5	17048	15426	0		8.72098
15836	Regions/clus5	17288	15426	0		8.84694
15843	Regions/clus5	17848	15426	0		9.16106
15844	Regions/clus5	17928	15426	0		9.95476
15845	Regions/clus5	18008	15426	0		8.44197
15846	Regions/clus5	18088	15426	0		9.75723
15847	Regions/clus5	18168	15426	0		9.20925
15848	Regions/clus5	18248	15426	0		9.34042
15849	Regions/clus5	18328	15426	0		7.36499
15850	Regions/clus5	18408	15426	0		10.6824
15851	Regions/clus5	18488	15426	0		8.75566
15852	Regions/clus5	18568	15426	0		7.97716
15853	Regions/clus5	18648	15426	0		10.0103
15854	Regions/clus5	18728	15426	0		9.51253
15855	Regions/clus5	18808	15426	0		9.9464
15856	Regions/clus5	18888	15426	0		10.0172
15910	Regions/clus5	14488	15346	0		8.83962
15918	Regions/clus5	15128	15346	0		9.45128
15929	Regions/clus5	16008	15346	0		10.7083
15930	Regions/clus5	16088	15346	0		10.2968
15931	Regions/clus5	16168	15346	0		8.77208
15932	Regions/clus5	16248	15346	0		10.0592
15933	Regions/clus5	16328	15346	0		9.47583
15934	Regions/clus5	16408	15346	0		8.92321
15935	Regions/clus5	16488	15346	0		9.202
15936	Regions/clus5	16568	15346	0		8.30257
15937	Regions/clus5	16648	15346	0		9.2007
15938	Regions/clus5	16728	15346	0		9.69931
15939	Regions/clus5	16808	15346	0		8.67542
15940	Regions/clus5	16888	15346	0		9.65803
15941	Regions/clus5	16968	15346	0		8.55944
15942	Regions/clus5	17048	15346	0		8.49301
15953	Regions/clus5	17928	15346	0		10.2722
15954	Regions/clus5	18008	15346	0		9.35969
15955	Regions/clus5	18088	15346	0		8.36811
15956	Regions/clus5	18168	15346	0		10.2859
15957	Regions/clus5	18248	15346	0		9.29813
15958	Regions/clus5	18328	15346	0		8.43404
15959	Regions/clus5	18408	15346	0		7.97712
15960	Regions/clus5	18488	15346	0		11.3898
15961	Regions/clus5	18568	15346	0		8.85532
15962	Regions/clus5	18648	15346	0		9.13645
15963	Regions/clus5	18728	15346	0		9.51532
15964	Regions/clus5	18808	15346	0		8.32526
15965	Regions/clus5	18888	15346	0		9.81353
15966	Regions/clus5	18968	15346	0		9.17724
15967	Regions/clus5	19048	15346	0		9.0343
15971	Regions/clus5	19368	15346	0		8.35562
16018	Regions/clus5	14328	15266	0		7.79485
16019	Regions/clus5	14408	15266	0		6.16522
16027	Regions/clus5	15048	15266	0		6.30693
16033	Regions/clus5	15528	15266	0		9.45029
16038	Regions/clus5	15928	15266	0		11.6251
16039	Regions/clus5	16008	15266	0		10.0217
16040	Regions/clus5	16088	15266	0		9.03034
16041	Regions/clus5	16168	15266	0		9.46376
16042	Regions/clus5	16248	15266	0		8.70275
16043	Regions/clus5	16328	15266	0		9.95621
16044	Regions/clus5	16408	15266	0		10.1697
16045	Regions/clus5	16488	15266	0		9.92163
16046	Regions/clus5	16568	15266	0		8.99909
16047	Regions/clus5	16648	15266	0		10.9036
16048	Regions/clus5	16728	15266	0		9.02661
16049	Regions/clus5	16808	15266	0		9.6736
16050	Regions/clus5	16888	15266	0		8.29811
16051	Regions/clus5	16968	15266	0		7.81147
16064	Regions/clus5	18008	15266	0		6.9994
16065	Regions/clus5	18088	15266	0		8.57102
16066	Regions/clus5	18168	15266	0		8.42484
16067	Regions/clus5	18248	15266	0		9.21718
16068	Regions/clus5	18328	15266	0		8.14036
16069	Regions/clus5	18408	15266	0		9.05531
16070	Regions/clus5	18488	15266	0		8.47759
16071	Regions/clus5	18568	15266	0		11.3116
16072	Regions/clus5	18648	15266	0		9.29142
[truncated: 3,017 more rows]

## Sheet: Figure S7F
spotId	raster	x	y	z	Date	N-Acetylaspartate/Aspartate
[truncated: 5,162 more rows]

[truncated: 4 more sheets: Figure S7G, Figure S7H, Figure S7I, Figure S7J]
