# Supplementary material for: Untargeted pixel-by-pixel metabolite ratio imaging as a novel tool for biomedical discovery in mass spectrometry imaging
Source: eLife. 2025 Mar 18;13:RP96892. doi: 10.7554/eLife.96892 (PMC11919253; doi:10.7554/eLife.96892)
Supplement: Figure 8—figure supplement 4—source data 1. [file elife-96892-fig8-figsupp4-data1.xlsx]

## Sheet: Fig S8 A
spotId	raster	x	y	z	Date	N-Acetylaspartylglutamate
0	0	3688	16226			172662
1	0	3768	16226			192594
2	0	3848	16226			226092
3	0	3928	16226			195457
4	0	4008	16226			235697
5	0	4088	16226			151884
6	0	4168	16226			99596.2
7	0	4248	16226			102925
8	0	4328	16226			155863
9	0	4408	16226			154600
10	0	4488	16226			148278
11	0	4568	16226			111584
12	0	4648	16226			60102.1
13	0	4728	16226			120934
14	0	4808	16226			2654.32
15	0	4888	16226			2654.32
16	0	4968	16226			2654.32
17	0	5048	16226			2654.32
18	0	5128	16226			2654.32
19	0	5208	16226			2654.32
20	0	5288	16226			2654.32
21	0	5368	16226			2654.32
22	0	5448	16226			2654.32
23	0	5528	16226			2654.32
24	0	5608	16226			2654.32
25	0	5688	16226			2654.32
26	0	5768	16226			2654.32
27	0	5848	16226			2654.32
28	0	3208	16146			160185
29	0	3288	16146			95081.4
30	0	3368	16146			2654.32
31	0	3448	16146			152923
32	0	3528	16146			101399
33	0	3608	16146			105514
34	0	3688	16146			221407
35	0	3768	16146			173876
36	0	3848	16146			2654.32
37	0	3928	16146			148443
38	0	4008	16146			201769
39	0	4088	16146			150069
40	0	4168	16146			141848
41	0	4248	16146			74637.8
42	0	4328	16146			144897
43	0	4408	16146			255464
44	0	4488	16146			204141
45	0	4568	16146			106749
46	0	4648	16146			115848
47	0	4728	16146			88890.9
48	0	4808	16146			119628
49	0	4888	16146			102293
50	0	4968	16146			98228.5
51	0	5048	16146			110640
52	0	5128	16146			100579
53	0	5208	16146			110672
54	0	5288	16146			2654.32
55	0	5368	16146			62767.7
56	0	5448	16146			73342.5
57	0	5528	16146			139327
58	0	5608	16146			83211.6
59	0	5688	16146			114676
60	0	5768	16146			136465
61	0	5848	16146			171690
62	0	5928	16146			88897
63	0	6008	16146			75458.6
64	0	6088	16146			2654.32
65	0	6168	16146			2654.32
66	0	6248	16146			2654.32
67	0	6328	16146			2654.32
68	0	6408	16146			2654.32
69	0	2728	16066			2654.32
70	0	2808	16066			172024
71	0	2888	16066			168074
72	0	2968	16066			151866
73	0	3048	16066			130943
74	0	3128	16066			135319
75	0	3208	16066			2654.32
76	0	3288	16066			2654.32
77	0	3368	16066			110220
78	0	3448	16066			116883
79	0	3528	16066			143492
80	0	3608	16066			223128
81	0	3688	16066			116136
82	0	3768	16066			203256
83	0	3848	16066			227832
84	0	3928	16066			193600
85	0	4008	16066			135475
86	0	4088	16066			171743
87	0	4168	16066			169644
88	0	4248	16066			114045
89	0	4328	16066			113296
90	0	4408	16066			179639
91	0	4488	16066			180980
92	0	4568	16066			153978
93	0	4648	16066			108999
94	0	4728	16066			117463
95	0	4808	16066			67962.2
96	0	4888	16066			107118
97	0	4968	16066			68359.2
98	0	5048	16066			2654.32
99	0	5128	16066			134840
100	0	5208	16066			2654.32
101	0	5288	16066			2654.32
102	0	5368	16066			83842.8
103	0	5448	16066			2654.32
104	0	5528	16066			2654.32
105	0	5608	16066			119481
106	0	5688	16066			2654.32
107	0	5768	16066			126174
108	0	5848	16066			71392.9
109	0	5928	16066			2654.32
110	0	6008	16066			84724.6
111	0	6088	16066			175849
112	0	6168	16066			177635
113	0	6248	16066			116087
114	0	6328	16066			90650.7
115	0	6408	16066			45597.4
116	0	6488	16066			43977.5
117	0	6568	16066			2654.32
118	0	6648	16066			2654.32
119	0	6728	16066			2654.32
120	0	6808	16066			41923.4
121	0	6888	16066			2654.32
122	0	6968	16066			2654.32
123	0	2248	15986			79064.3
124	0	2328	15986			89522.1
125	0	2408	15986			2654.32
126	0	2488	15986			171492
127	0	2568	15986			192419
128	0	2648	15986			136809
129	0	2728	15986			141784
130	0	2808	15986			153391
131	0	2888	15986			2654.32
132	0	2968	15986			2654.32
133	0	3048	15986			175099
134	0	3128	15986			111689
135	0	3208	15986			206139
136	0	3288	15986			170568
137	0	3368	15986			161036
138	0	3448	15986			138979
139	0	3528	15986			181664
140	0	3608	15986			269435
141	0	3688	15986			239130
142	0	3768	15986			250224
143	0	3848	15986			160398
144	0	3928	15986			168344
145	0	4008	15986			258135
146	0	4088	15986			214059
147	0	4168	15986			176319
148	0	4248	15986			232405
149	0	4328	15986			261717
150	0	4408	15986			172973
151	0	4488	15986			175200
152	0	4568	15986			222152
153	0	4648	15986			121423
154	0	4728	15986			156226
155	0	4808	15986			162283
156	0	4888	15986			92777
157	0	4968	15986			91004.7
158	0	5048	15986			121436
159	0	5128	15986			205045
160	0	5208	15986			133205
161	0	5288	15986			2654.32
162	0	5368	15986			2654.32
163	0	5448	15986			144966
164	0	5528	15986			148265
165	0	5608	15986			114942
166	0	5688	15986			134951
167	0	5768	15986			136374
168	0	5848	15986			123814
169	0	5928	15986			2654.32
170	0	6008	15986			108298
171	0	6088	15986			113733
172	0	6168	15986			202789
173	0	6248	15986			174113
174	0	6328	15986			148261
175	0	6408	15986			2654.32
176	0	6488	15986			81469.5
177	0	6568	15986			91640.7
178	0	6648	15986			2654.32
179	0	6728	15986			2654.32
180	0	6808	15986			94201
181	0	6888	15986			57259.8
182	0	6968	15986			43145.2
183	0	7048	15986			2654.32
184	0	7128	15986			2654.32
185	0	7208	15986			2654.32
186	0	1848	15906			2654.32
187	0	1928	15906			2654.32
188	0	2008	15906			144744
189	0	2088	15906			2654.32
190	0	2168	15906			130403
191	0	2248	15906			73480.6
192	0	2328	15906			113916
193	0	2408	15906			2654.32
194	0	2488	15906			255075
195	0	2568	15906			167003
196	0	2648	15906			2654.32
197	0	2728	15906			2654.32
198	0	2808	15906			161271
199	0	2888	15906			161460
200	0	2968	15906			231654
201	0	3048	15906			149690
202	0	3128	15906			293095
203	0	3208	15906			226781
204	0	3288	15906			150443
205	0	3368	15906			161939
206	0	3448	15906			136752
207	0	3528	15906			193821
208	0	3608	15906			210851
209	0	3688	15906			195188
210	0	3768	15906			271481
211	0	3848	15906			250308
212	0	3928	15906			293792
213	0	4008	15906			257416
214	0	4088	15906			204201
215	0	4168	15906			191227
216	0	4248	15906			326399
217	0	4328	15906			204457
218	0	4408	15906			2654.32
219	0	4488	15906			239516
220	0	4568	15906			151641
221	0	4648	15906			212010
222	0	4728	15906			118185
223	0	4808	15906			2654.32
224	0	4888	15906			2654.32
225	0	4968	15906			152386
226	0	5048	15906			136104
227	0	5128	15906			161033
228	0	5208	15906			2654.32
229	0	5288	15906			153974
230	0	5368	15906			131015
231	0	5448	15906			2654.32
232	0	5528	15906			2654.32
233	0	5608	15906			2654.32
234	0	5688	15906			175413
235	0	5768	15906			106850
236	0	5848	15906			204725
237	0	5928	15906			2654.32
238	0	6008	15906			196517
239	0	6088	15906			144415
240	0	6168	15906			173081
241	0	6248	15906			125389
242	0	6328	15906			2654.32
243	0	6408	15906			2654.32
244	0	6488	15906			66097
245	0	6568	15906			74098
246	0	6648	15906			64201
247	0	6728	15906			63250
248	0	6808	15906			2654.32
249	0	6888	15906			96052.7
250	0	6968	15906			54984.8
251	0	7048	15906			64176.9
252	0	7128	15906			105216
253	0	7208	15906			48532.3
254	0	7288	15906			2654.32
255	0	7368	15906			2654.32
256	0	1688	15826			114944
257	0	1768	15826			95297.5
258	0	1848	15826			139749
259	0	1928	15826			34810.3
260	0	2008	15826			100768
261	0	2088	15826			132577
262	0	2168	15826			173918
263	0	2248	15826			2654.32
264	0	2328	15826			152339
265	0	2408	15826			131895
266	0	2488	15826			171391
267	0	2568	15826			194218
268	0	2648	15826			101340
269	0	2728	15826			128249
270	0	2808	15826			204894
271	0	2888	15826			227983
272	0	2968	15826			167572
273	0	3048	15826			179998
274	0	3128	15826			148342
275	0	3208	15826			282515
276	0	3288	15826			197438
277	0	3368	15826			296680
278	0	3448	15826			220130
279	0	3528	15826			335318
280	0	3608	15826			303443
281	0	3688	15826			225071
282	0	3768	15826			167496
283	0	3848	15826			256493
284	0	3928	15826			236523
285	0	4008	15826			227327
286	0	4088	15826			209859
287	0	4168	15826			249453
288	0	4248	15826			155940
289	0	4328	15826			132751
290	0	4408	15826			192241
291	0	4488	15826			249960
292	0	4568	15826			266971
293	0	4648	15826			140655
294	0	4728	15826			258302
295	0	4808	15826			237367
296	0	4888	15826			241535
297	0	4968	15826			2654.32
298	0	5048	15826			194224
299	0	5128	15826			174069
300	0	5208	15826			2654.32
301	0	5288	15826			184603
302	0	5368	15826			193100
303	0	5448	15826			159043
304	0	5528	15826			2654.32
305	0	5608	15826			2654.32
306	0	5688	15826			2654.32
307	0	5768	15826			140929
308	0	5848	15826			163723
309	0	5928	15826			163053
310	0	6008	15826			246416
311	0	6088	15826			2654.32
312	0	6168	15826			2654.32
313	0	6248	15826			160266
314	0	6328	15826			2654.32
315	0	6408	15826			121640
316	0	6488	15826			124796
317	0	6568	15826			2654.32
318	0	6648	15826			2654.32
319	0	6728	15826			84303.2
320	0	6808	15826			117009
321	0	6888	15826			2654.32
322	0	6968	15826			114042
323	0	7048	15826			108769
324	0	7128	15826			85829.4
325	0	7208	15826			2654.32
326	0	7288	15826			40837.3
327	0	7368	15826			46485.9
328	0	7448	15826			107967
329	0	1608	15746			77342.8
330	0	1688	15746			106270
331	0	1768	15746			151743
332	0	1848	15746			124974
333	0	1928	15746			87572.4
334	0	2008	15746			147253
335	0	2088	15746			144494
336	0	2168	15746			2654.32
337	0	2248	15746			2654.32
338	0	2328	15746			247419
339	0	2408	15746			155476
340	0	2488	15746			284971
341	0	2568	15746			233687
342	0	2648	15746			130129
343	0	2728	15746			175596
344	0	2808	15746			220074
345	0	2888	15746			152433
346	0	2968	15746			163661
347	0	3048	15746			162394
348	0	3128	15746			188925
349	0	3208	15746			186477
350	0	3288	15746			312368
351	0	3368	15746			246730
352	0	3448	15746			206644
353	0	3528	15746			303085
354	0	3608	15746			311121
355	0	3688	15746			292989
356	0	3768	15746			195216
357	0	3848	15746			192711
358	0	3928	15746			241194
359	0	4008	15746			161502
360	0	4088	15746			169032
361	0	4168	15746			199948
362	0	4248	15746			249440
363	0	4328	15746			178901
364	0	4408	15746			202914
365	0	4488	15746			266965
366	0	4568	15746			228225
367	0	4648	15746			210381
368	0	4728	15746			195529
369	0	4808	15746			256210
370	0	4888	15746			293160
371	0	4968	15746			2654.32
372	0	5048	15746			205944
373	0	5128	15746			199492
374	0	5208	15746			147022
375	0	5288	15746			203779
376	0	5368	15746			200809
377	0	5448	15746			199539
378	0	5528	15746			217817
379	0	5608	15746			169952
380	0	5688	15746			128064
381	0	5768	15746			200270
382	0	5848	15746			197914
383	0	5928	15746			130947
384	0	6008	15746			2654.32
385	0	6088	15746			121329
386	0	6168	15746			2654.32
387	0	6248	15746			140680
388	0	6328	15746			94921
389	0	6408	15746			2654.32
390	0	6488	15746			108592
391	0	6568	15746			119748
392	0	6648	15746			216478
393	0	6728	15746			85835.1
394	0	6808	15746			179390
395	0	6888	15746			102171
396	0	6968	15746			204914
397	0	7048	15746			151799
398	0	7128	15746			2654.32
399	0	7208	15746			2654.32
400	0	7288	15746			110839
401	0	7368	15746			76326.1
402	0	7448	15746			77905
403	0	7528	15746			122214
404	0	7608	15746			146241
405	0	1528	15666			99901.2
406	0	1608	15666			83782.7
407	0	1688	15666			2654.32
408	0	1768	15666			106949
409	0	1848	15666			129183
410	0	1928	15666			2654.32
411	0	2008	15666			2654.32
412	0	2088	15666			197383
413	0	2168	15666			207771
414	0	2248	15666			207634
415	0	2328	15666			220089
416	0	2408	15666			179628
417	0	2488	15666			259186
418	0	2568	15666			222466
419	0	2648	15666			100785
420	0	2728	15666			65054.7
421	0	2808	15666			164079
422	0	2888	15666			225991
423	0	2968	15666			198337
424	0	3048	15666			207986
425	0	3128	15666			139412
426	0	3208	15666			220666
427	0	3288	15666			204904
428	0	3368	15666			256947
429	0	3448	15666			315393
430	0	3528	15666			231544
431	0	3608	15666			220830
432	0	3688	15666			266263
433	0	3768	15666			316023
434	0	3848	15666			201929
435	0	3928	15666			175614
436	0	4008	15666			279808
437	0	4088	15666			204746
438	0	4168	15666			267417
439	0	4248	15666			172336
440	0	4328	15666			281968
441	0	4408	15666			288021
442	0	4488	15666			169354
443	0	4568	15666			275229
444	0	4648	15666			169636
445	0	4728	15666			179582
446	0	4808	15666			144149
447	0	4888	15666			267610
448	0	4968	15666			208345
449	0	5048	15666			252782
450	0	5128	15666			261772
451	0	5208	15666			2654.32
452	0	5288	15666			245692
453	0	5368	15666			215805
454	0	5448	15666			277251
455	0	5528	15666			151535
456	0	5608	15666			217229
457	0	5688	15666			252605
458	0	5768	15666			134410
459	0	5848	15666			2654.32
460	0	5928	15666			193442
461	0	6008	15666			167635
462	0	6088	15666			164008
463	0	6168	15666			176244
464	0	6248	15666			128371
465	0	6328	15666			2654.32
466	0	6408	15666			188340
467	0	6488	15666			131942
468	0	6568	15666			99612.1
469	0	6648	15666			185910
470	0	6728	15666			2654.32
471	0	6808	15666			149705
472	0	6888	15666			160260
473	0	6968	15666			151561
474	0	7048	15666			180569
475	0	7128	15666			2654.32
476	0	7208	15666			153394
477	0	7288	15666			2654.32
478	0	7368	15666			2654.32
479	0	7448	15666			109909
480	0	7528	15666			76644.8
481	0	7608	15666			192411
482	0	7688	15666			162862
483	0	7768	15666			100974
484	0	1528	15586			2654.32
485	0	1608	15586			2654.32
486	0	1688	15586			2654.32
487	0	1768	15586			134623
488	0	1848	15586			175750
489	0	1928	15586			221318
490	0	2008	15586			170643
491	0	2088	15586			2654.32
492	0	2168	15586			135795
493	0	2248	15586			2654.32
494	0	2328	15586			161785
495	0	2408	15586			349791
496	0	2488	15586			307231
497	0	2568	15586			247686
498	0	2648	15586			164442
499	0	2728	15586			165937
500	0	2808	15586			217150
501	0	2888	15586			189023
502	0	2968	15586			184239
503	0	3048	15586			285580
504	0	3128	15586			239327
505	0	3208	15586			316210
506	0	3288	15586			179785
507	0	3368	15586			315714
508	0	3448	15586			233248
509	0	3528	15586			294835
510	0	3608	15586			160626
511	0	3688	15586			264606
512	0	3768	15586			325594
513	0	3848	15586			2654.32
514	0	3928	15586			194366
515	0	4008	15586			2654.32
516	0	4088	15586			170729
517	0	4168	15586			2654.32
518	0	4248	15586			208894
519	0	4328	15586			245979
520	0	4408	15586			136134
521	0	4488	15586			154160
522	0	4568	15586			290210
523	0	4648	15586			231434
524	0	4728	15586			257607
525	0	4808	15586			270437
526	0	4888	15586			261450
527	0	4968	15586			270441
528	0	5048	15586			185848
529	0	5128	15586			2654.32
530	0	5208	15586			176725
531	0	5288	15586			155560
532	0	5368	15586			192062
533	0	5448	15586			2654.32
534	0	5528	15586			250513
535	0	5608	15586			144156
536	0	5688	15586			318757
537	0	5768	15586			176943
538	0	5848	15586			209417
539	0	5928	15586			132616
540	0	6008	15586			268361
541	0	6088	15586			201814
542	0	6168	15586			209240
543	0	6248	15586			144913
544	0	6328	15586			90190.5
545	0	6408	15586			148152
546	0	6488	15586			180700
547	0	6568	15586			164830
548	0	6648	15586			2654.32
549	0	6728	15586			123055
550	0	6808	15586			113565
551	0	6888	15586			158502
552	0	6968	15586			148884
553	0	7048	15586			183460
554	0	7128	15586			2654.32
555	0	7208	15586			154038
556	0	7288	15586			162749
557	0	7368	15586			2654.32
558	0	7448	15586			176255
559	0	7528	15586			2654.32
560	0	7608	15586			2654.32
561	0	7688	15586			140537
562	0	7768	15586			93524.8
563	0	7848	15586			138672
564	0	1448	15506			2654.32
565	0	1528	15506			2654.32
566	0	1608	15506			2654.32
567	0	1688	15506			2654.32
568	0	1768	15506			2654.32
569	0	1848	15506			151851
570	0	1928	15506			132366
571	0	2008	15506			210473
572	0	2088	15506			144966
573	0	2168	15506			2654.32
574	0	2248	15506			2654.32
575	0	2328	15506			323612
576	0	2408	15506			248733
577	0	2488	15506			437742
578	0	2568	15506			403478
579	0	2648	15506			175848
580	0	2728	15506			248749
581	0	2808	15506			234244
582	0	2888	15506			131552
583	0	2968	15506			335416
584	0	3048	15506			256594
585	0	3128	15506			314425
586	0	3208	15506			220204
587	0	3288	15506			280414
588	0	3368	15506			270110
589	0	3448	15506			280252
590	0	3528	15506			249194
591	0	3608	15506			242823
592	0	3688	15506			235888
593	0	3768	15506			339402
594	0	3848	15506			818247
595	0	3928	15506			1.12279e+06
596	0	4008	15506			2654.32
597	0	4088	15506			239151
598	0	4168	15506			164587
599	0	4248	15506			2654.32
600	0	4328	15506			225728
601	0	4408	15506			263915
602	0	4488	15506			225840
603	0	4568	15506			319210
604	0	4648	15506			226106
605	0	4728	15506			215127
606	0	4808	15506			249250
607	0	4888	15506			270838
608	0	4968	15506			182860
609	0	5048	15506			235007
610	0	5128	15506			268875
611	0	5208	15506			322821
612	0	5288	15506			241449
613	0	5368	15506			260437
614	0	5448	15506			2654.32
615	0	5528	15506			159179
616	0	5608	15506			188861
617	0	5688	15506			173757
618	0	5768	15506			327748
619	0	5848	15506			214101
620	0	5928	15506			171842
621	0	6008	15506			235298
622	0	6088	15506			207678
623	0	6168	15506			164544
624	0	6248	15506			2654.32
625	0	6328	15506			114238
626	0	6408	15506			220291
627	0	6488	15506			259242
628	0	6568	15506			171452
629	0	6648	15506			258444
630	0	6728	15506			248146
631	0	6808	15506			210887
632	0	6888	15506			163055
633	0	6968	15506			2654.32
634	0	7048	15506			149325
635	0	7128	15506			128616
636	0	7208	15506			203064
637	0	7288	15506			204658
638	0	7368	15506			213262
639	0	7448	15506			172177
640	0	7528	15506			208316
641	0	7608	15506			116969
642	0	7688	15506			2654.32
643	0	7768	15506			123107
644	0	7848	15506			106436
645	0	7928	15506			115573
646	0	8008	15506			92076.7
647	0	1368	15426			2654.32
648	0	1448	15426			2654.32
649	0	1528	15426			142604
650	0	1608	15426			2654.32
651	0	1688	15426			2654.32
652	0	1768	15426			162025
653	0	1848	15426			243573
654	0	1928	15426			180231
655	0	2008	15426			273523
656	0	2088	15426			179631
657	0	2168	15426			2654.32
658	0	2248	15426			145064
659	0	2328	15426			161561
660	0	2408	15426			258163
661	0	2488	15426			322966
662	0	2568	15426			386584
663	0	2648	15426			254887
664	0	2728	15426			199708
665	0	2808	15426			179342
666	0	2888	15426			268065
667	0	2968	15426			262207
668	0	3048	15426			285098
669	0	3128	15426			292490
670	0	3208	15426			172067
671	0	3288	15426			322283
672	0	3368	15426			190391
673	0	3448	15426			397026
674	0	3528	15426			268725
675	0	3608	15426			306604
676	0	3688	15426			251573
677	0	3768	15426			217247
678	0	3848	15426			200576
679	0	3928	15426			244372
680	0	4008	15426			167446
681	0	4088	15426			232600
682	0	4168	15426			171705
683	0	4248	15426			199157
684	0	4328	15426			2654.32
685	0	4408	15426			318377
686	0	4488	15426			263945
687	0	4568	15426			257743
688	0	4648	15426			194144
689	0	4728	15426			312074
690	0	4808	15426			305712
691	0	4888	15426			198267
692	0	4968	15426			215257
693	0	5048	15426			123033
694	0	5128	15426			200494
695	0	5208	15426			206302
696	0	5288	15426			148028
697	0	5368	15426			186818
698	0	5448	15426			269322
699	0	5528	15426			274626
700	0	5608	15426			2654.32
701	0	5688	15426			153835
702	0	5768	15426			261086
703	0	5848	15426			247481
704	0	5928	15426			258202
705	0	6008	15426			113113
706	0	6088	15426			2654.32
707	0	6168	15426			119199
708	0	6248	15426			142395
709	0	6328	15426			291598
710	0	6408	15426			175997
711	0	6488	15426			236430
712	0	6568	15426			206060
713	0	6648	15426			150058
714	0	6728	15426			147414
715	0	6808	15426			209138
716	0	6888	15426			281884
717	0	6968	15426			167981
718	0	7048	15426			2654.32
719	0	7128	15426			202456
720	0	7208	15426			169403
721	0	7288	15426			163806
722	0	7368	15426			150980
723	0	7448	15426			143520
724	0	7528	15426			2654.32
725	0	7608	15426			132998
726	0	7688	15426			134587
727	0	7768	15426			116999
728	0	7848	15426			2654.32
729	0	7928	15426			2654.32
730	0	8008	15426			79336.9
731	0	8088	15426			65427
732	0	8168	15426			106793
733	0	1288	15346			2654.32
734	0	1368	15346			118051
735	0	1448	15346			2654.32
736	0	1528	15346			2654.32
737	0	1608	15346			2654.32
738	0	1688	15346			2654.32
739	0	1768	15346			2654.32
740	0	1848	15346			2654.32
741	0	1928	15346			2654.32
742	0	2008	15346			246843
743	0	2088	15346			2654.32
744	0	2168	15346			225222
745	0	2248	15346			114913
746	0	2328	15346			138939
747	0	2408	15346			289173
748	0	2488	15346			227502
749	0	2568	15346			257884
750	0	2648	15346			299209
751	0	2728	15346			349896
752	0	2808	15346			261084
753	0	2888	15346			268477
754	0	2968	15346			243232
755	0	3048	15346			234289
756	0	3128	15346			2654.32
757	0	3208	15346			222421
758	0	3288	15346			267386
759	0	3368	15346			211481
760	0	3448	15346			258432
761	0	3528	15346			294603
762	0	3608	15346			331829
763	0	3688	15346			254433
764	0	3768	15346			221579
765	0	3848	15346			246035
766	0	3928	15346			182163
767	0	4008	15346			154603
768	0	4088	15346			151629
769	0	4168	15346			163030
770	0	4248	15346			200140
771	0	4328	15346			231722
772	0	4408	15346			246426
773	0	4488	15346			309292
774	0	4568	15346			174921
775	0	4648	15346			188901
776	0	4728	15346			229064
777	0	4808	15346			234884
778	0	4888	15346			2654.32
779	0	4968	15346			164184
780	0	5048	15346			215726
781	0	5128	15346			222292
782	0	5208	15346			217836
783	0	5288	15346			259481
784	0	5368	15346			209478
785	0	5448	15346			2654.32
786	0	5528	15346			341351
787	0	5608	15346			410564
788	0	5688	15346			285911
789	0	5768	15346			251543
790	0	5848	15346			137396
791	0	5928	15346			2654.32
792	0	6008	15346			269501
793	0	6088	15346			364756
794	0	6168	15346			191318
795	0	6248	15346			256721
796	0	6328	15346			259251
797	0	6408	15346			225263
798	0	6488	15346			212892
799	0	6568	15346			2654.32
800	0	6648	15346			165509
801	0	6728	15346			193676
802	0	6808	15346			217765
803	0	6888	15346			197572
804	0	6968	15346			159550
805	0	7048	15346			2654.32
806	0	7128	15346			151738
807	0	7208	15346			132173
808	0	7288	15346			119083
809	0	7368	15346			2654.32
810	0	7448	15346			194672
811	0	7528	15346			187532
812	0	7608	15346			238102
813	0	7688	15346			2654.32
814	0	7768	15346			135424
815	0	7848	15346			2654.32
816	0	7928	15346			2654.32
817	0	8008	15346			2654.32
818	0	8088	15346			2654.32
819	0	8168	15346			73412.6
820	0	8248	15346			128819
821	0	1208	15266			2654.32
822	0	1288	15266			2654.32
823	0	1368	15266			2654.32
824	0	1448	15266			2654.32
825	0	1528	15266			141060
826	0	1608	15266			2654.32
827	0	1688	15266			2654.32
828	0	1768	15266			167066
829	0	1848	15266			203600
830	0	1928	15266			2654.32
831	0	2008	15266			115745
832	0	2088	15266			2654.32
833	0	2168	15266			202504
834	0	2248	15266			129760
835	0	2328	15266			204929
836	0	2408	15266			197455
837	0	2488	15266			367996
838	0	2568	15266			207200
839	0	2648	15266			218687
840	0	2728	15266			268322
841	0	2808	15266			244817
842	0	2888	15266			283562
843	0	2968	15266			159531
844	0	3048	15266			188172
845	0	3128	15266			146267
846	0	3208	15266			201239
847	0	3288	15266			235968
848	0	3368	15266			146349
849	0	3448	15266			263431
850	0	3528	15266			2654.32
851	0	3608	15266			236170
852	0	3688	15266			374373
853	0	3768	15266			201795
854	0	3848	15266			2654.32
855	0	3928	15266			249191
856	0	4008	15266			177239
857	0	4088	15266			252154
858	0	4168	15266			234445
859	0	4248	15266			224220
860	0	4328	15266			179378
861	0	4408	15266			158620
862	0	4488	15266			162956
863	0	4568	15266			196256
864	0	4648	15266			151388
865	0	4728	15266			236610
866	0	4808	15266			155339
867	0	4888	15266			342683
868	0	4968	15266			272078
869	0	5048	15266			208203
870	0	5128	15266			310635
871	0	5208	15266			168127
872	0	5288	15266			265642
873	0	5368	15266			211652
874	0	5448	15266			2654.32
875	0	5528	15266			441234
876	0	5608	15266			262314
877	0	5688	15266			434383
878	0	5768	15266			157588
879	0	5848	15266			2654.32
880	0	5928	15266			233129
881	0	6008	15266			185043
882	0	6088	15266			180852
883	0	6168	15266			208532
884	0	6248	15266			325323
885	0	6328	15266			331177
886	0	6408	15266			386946
887	0	6488	15266			280282
888	0	6568	15266			145885
889	0	6648	15266			254152
890	0	6728	15266			290576
891	0	6808	15266			197756
892	0	6888	15266			278476
893	0	6968	15266			272489
894	0	7048	15266			154578
895	0	7128	15266			146839
896	0	7208	15266			2654.32
897	0	7288	15266			196484
898	0	7368	15266			168116
899	0	7448	15266			217791
900	0	7528	15266			149219
901	0	7608	15266			207015
902	0	7688	15266			2654.32
903	0	7768	15266			2654.32
904	0	7848	15266			174584
905	0	7928	15266			147290
906	0	8008	15266			126080
907	0	8088	15266			2654.32
908	0	8168	15266			2654.32
909	0	8248	15266			104441
910	0	8328	15266			91656.4
911	0	8408	15266			71797
912	0	1208	15186			122993
913	0	1288	15186			2654.32
914	0	1368	15186			133851
915	0	1448	15186			2654.32
916	0	1528	15186			191560
917	0	1608	15186			2654.32
918	0	1688	15186			2654.32
919	0	1768	15186			157884
920	0	1848	15186			125426
921	0	1928	15186			148059
922	0	2008	15186			2654.32
923	0	2088	15186			146431
924	0	2168	15186			191697
925	0	2248	15186			213072
926	0	2328	15186			2654.32
927	0	2408	15186			254831
928	0	2488	15186			231063
929	0	2568	15186			188636
930	0	2648	15186			211009
931	0	2728	15186			209274
932	0	2808	15186			193064
933	0	2888	15186			137805
934	0	2968	15186			198003
935	0	3048	15186			198567
936	0	3128	15186			178592
937	0	3208	15186			186732
938	0	3288	15186			165582
939	0	3368	15186			285339
940	0	3448	15186			249850
941	0	3528	15186			200163
942	0	3608	15186			168069
943	0	3688	15186			232773
944	0	3768	15186			138908
945	0	3848	15186			217088
946	0	3928	15186			2654.32
947	0	4008	15186			164064
948	0	4088	15186			193781
949	0	4168	15186			2654.32
950	0	4248	15186			181910
951	0	4328	15186			160864
952	0	4408	15186			2654.32
953	0	4488	15186			144326
954	0	4568	15186			233969
955	0	4648	15186			192351
956	0	4728	15186			283035
957	0	4808	15186			320425
958	0	4888	15186			277585
959	0	4968	15186			254073
960	0	5048	15186			302392
961	0	5128	15186			2654.32
962	0	5208	15186			385361
963	0	5288	15186			281856
964	0	5368	15186			216994
965	0	5448	15186			246107
966	0	5528	15186			207592
967	0	5608	15186			270122
968	0	5688	15186			255171
969	0	5768	15186			396884
970	0	5848	15186			170651
971	0	5928	15186			197885
972	0	6008	15186			264846
973	0	6088	15186			411758
974	0	6168	15186			256229
975	0	6248	15186			301205
976	0	6328	15186			256818
977	0	6408	15186			288261
978	0	6488	15186			317313
979	0	6568	15186			427743
980	0	6648	15186			325976
981	0	6728	15186			184339
982	0	6808	15186			354129
983	0	6888	15186			243334
984	0	6968	15186			265181
985	0	7048	15186			169515
986	0	7128	15186			205902
987	0	7208	15186			217177
988	0	7288	15186			2654.32
989	0	7368	15186			197004
990	0	7448	15186			172150
991	0	7528	15186			147025
992	0	7608	15186			175613
993	0	7688	15186			2654.32
994	0	7768	15186			2654.32
995	0	7848	15186			2654.32
996	0	7928	15186			134389
997	0	8008	15186			2654.32
998	0	8088	15186			2654.32
999	0	8168	15186			2654.32
1000	0	8248	15186			2654.32
1001	0	8328	15186			2654.32
1002	0	8408	15186			140586
1003	0	8488	15186			68752.7
1004	0	1128	15106			165223
1005	0	1208	15106			2654.32
1006	0	1288	15106			2654.32
1007	0	1368	15106			2654.32
1008	0	1448	15106			2654.32
1009	0	1528	15106			2654.32
1010	0	1608	15106			2654.32
1011	0	1688	15106			2654.32
1012	0	1768	15106			2654.32
1013	0	1848	15106			135220
1014	0	1928	15106			209012
1015	0	2008	15106			112724
1016	0	2088	15106			2654.32
1017	0	2168	15106			2654.32
1018	0	2248	15106			2654.32
1019	0	2328	15106			151935
1020	0	2408	15106			133546
1021	0	2488	15106			135249
1022	0	2568	15106			2654.32
1023	0	2648	15106			2654.32
1024	0	2728	15106			211480
1025	0	2808	15106			2654.32
1026	0	2888	15106			139860
1027	0	2968	15106			256166
1028	0	3048	15106			194616
1029	0	3128	15106			228373
1030	0	3208	15106			187593
1031	0	3288	15106			264086
1032	0	3368	15106			362018
1033	0	3448	15106			400219
1034	0	3528	15106			232632
1035	0	3608	15106			231380
1036	0	3688	15106			134962
1037	0	3768	15106			193503
1038	0	3848	15106			88144.9
1039	0	3928	15106			120604
1040	0	4008	15106			190599
1041	0	4088	15106			232155
1042	0	4168	15106			196783
1043	0	4248	15106			290737
1044	0	4328	15106			147741
1045	0	4408	15106			157989
1046	0	4488	15106			163744
1047	0	4568	15106			177242
1048	0	4648	15106			242596
1049	0	4728	15106			257191
1050	0	4808	15106			182949
1051	0	4888	15106			160507
1052	0	4968	15106			199967
1053	0	5048	15106			178380
1054	0	5128	15106			256586
1055	0	5208	15106			210982
1056	0	5288	15106			281581
1057	0	5368	15106			192734
1058	0	5448	15106			2654.32
1059	0	5528	15106			2654.32
1060	0	5608	15106			200956
1061	0	5688	15106			337458
1062	0	5768	15106			281699
1063	0	5848	15106			209660
1064	0	5928	15106			368778
1065	0	6008	15106			415023
1066	0	6088	15106			286826
1067	0	6168	15106			246395
1068	0	6248	15106			251842
1069	0	6328	15106			270459
1070	0	6408	15106			305970
1071	0	6488	15106			430021
1072	0	6568	15106			250556
1073	0	6648	15106			252543
1074	0	6728	15106			217574
1075	0	6808	15106			249954
1076	0	6888	15106			237970
1077	0	6968	15106			155588
1078	0	7048	15106			227008
1079	0	7128	15106			292017
1080	0	7208	15106			216873
1081	0	7288	15106			2654.32
1082	0	7368	15106			209938
1083	0	7448	15106			303288
1084	0	7528	15106			265599
1085	0	7608	15106			155546
1086	0	7688	15106			189266
1087	0	7768	15106			2654.32
1088	0	7848	15106			2654.32
1089	0	7928	15106			2654.32
1090	0	8008	15106			142670
1091	0	8088	15106			150028
1092	0	8168	15106			144766
1093	0	8248	15106			2654.32
1094	0	8328	15106			139327
1095	0	8408	15106			2654.32
1096	0	8488	15106			2654.32
1097	0	8568	15106			37948.9
1098	0	8648	15106			50280.3
1099	0	1048	15026			162969
1100	0	1128	15026			219782
1101	0	1208	15026			2654.32
1102	0	1288	15026			2654.32
1103	0	1368	15026			2654.32
1104	0	1448	15026			197000
1105	0	1528	15026			2654.32
1106	0	1608	15026			2654.32
1107	0	1688	15026			2654.32
1108	0	1768	15026			229806
1109	0	1848	15026			2654.32
1110	0	1928	15026			143382
1111	0	2008	15026			139316
1112	0	2088	15026			227030
1113	0	2168	15026			220123
1114	0	2248	15026			177380
1115	0	2328	15026			153922
1116	0	2408	15026			128568
1117	0	2488	15026			156243
1118	0	2568	15026			2654.32
1119	0	2648	15026			2654.32
1120	0	2728	15026			2654.32
1121	0	2808	15026			134881
1122	0	2888	15026			143864
1123	0	2968	15026			94577.9
1124	0	3048	15026			167745
1125	0	3128	15026			266378
1126	0	3208	15026			2654.32
1127	0	3288	15026			209702
1128	0	3368	15026			163188
1129	0	3448	15026			157637
1130	0	3528	15026			244142
1131	0	3608	15026			198004
1132	0	3688	15026			79831
1133	0	3768	15026			116583
1134	0	3848	15026			2654.32
1135	0	3928	15026			42029.7
1136	0	4008	15026			149050
1137	0	4088	15026			88973.9
1138	0	4168	15026			163284
1139	0	4248	15026			182953
1140	0	4328	15026			2654.32
1141	0	4408	15026			2654.32
1142	0	4488	15026			2654.32
1143	0	4568	15026			2654.32
1144	0	4648	15026			249304
1145	0	4728	15026			159250
1146	0	4808	15026			223044
1147	0	4888	15026			265917
1148	0	4968	15026			256777
1149	0	5048	15026			206210
1150	0	5128	15026			248801
1151	0	5208	15026			313393
1152	0	5288	15026			178365
1153	0	5368	15026			2654.32
1154	0	5448	15026			2654.32
1155	0	5528	15026			222931
1156	0	5608	15026			2654.32
1157	0	5688	15026			251535
1158	0	5768	15026			2654.32
1159	0	5848	15026			413353
1160	0	5928	15026			352582
1161	0	6008	15026			597404
1162	0	6088	15026			261140
1163	0	6168	15026			286201
1164	0	6248	15026			441741
1165	0	6328	15026			193816
1166	0	6408	15026			2654.32
1167	0	6488	15026			312757
1168	0	6568	15026			410152
1169	0	6648	15026			207956
1170	0	6728	15026			365371
1171	0	6808	15026			179292
1172	0	6888	15026			2654.32
1173	0	6968	15026			164474
1174	0	7048	15026			278847
1175	0	7128	15026			124988
1176	0	7208	15026			234886
1177	0	7288	15026			166554
1178	0	7368	15026			261325
1179	0	7448	15026			317071
1180	0	7528	15026			141700
1181	0	7608	15026			177454
1182	0	7688	15026			178578
1183	0	7768	15026			2654.32
1184	0	7848	15026			187875
1185	0	7928	15026			2654.32
1186	0	8008	15026			125903
1187	0	8088	15026			2654.32
1188	0	8168	15026			158177
1189	0	8248	15026			2654.32
1190	0	8328	15026			2654.32
1191	0	8408	15026			175063
1192	0	8488	15026			119350
1193	0	8568	15026			2654.32
1194	0	8648	15026			69920.9
1195	0	8728	15026			2654.32
1196	0	8808	15026			2654.32
1197	0	968	14946			2654.32
1198	0	1048	14946			2654.32
1199	0	1128	14946			150714
1200	0	1208	14946			118185
1201	0	1288	14946			2654.32
1202	0	1368	14946			2654.32
1203	0	1448	14946			2654.32
1204	0	1528	14946			2654.32
1205	0	1608	14946			2654.32
1206	0	1688	14946			2654.32
1207	0	1768	14946			2654.32
1208	0	1848	14946			164966
1209	0	1928	14946			2654.32
1210	0	2008	14946			110249
1211	0	2088	14946			182007
1212	0	2168	14946			136072
1213	0	2248	14946			2654.32
1214	0	2328	14946			167540
1215	0	2408	14946			2654.32
1216	0	2488	14946			2654.32
1217	0	2568	14946			2654.32
1218	0	2648	14946			26079.9
1219	0	2728	14946			149354
1220	0	2808	14946			112289
1221	0	2888	14946			71499.7
1222	0	2968	14946			2654.32
1223	0	3048	14946			200746
1224	0	3128	14946			274028
1225	0	3208	14946			241490
1226	0	3288	14946			160187
1227	0	3368	14946			228133
1228	0	3448	14946			192267
1229	0	3528	14946			119126
1230	0	3608	14946			107246
1231	0	3688	14946			137365
1232	0	3768	14946			146408
1233	0	3848	14946			137277
1234	0	3928	14946			45319.3
1235	0	4008	14946			65806.9
1236	0	4088	14946			175316
1237	0	4168	14946			123219
1238	0	4248	14946			165794
1239	0	4328	14946			168064
1240	0	4408	14946			228877
1241	0	4488	14946			127741
1242	0	4568	14946			2654.32
1243	0	4648	14946			2654.32
1244	0	4728	14946			272051
1245	0	4808	14946			286359
1246	0	4888	14946			369877
1247	0	4968	14946			266636
1248	0	5048	14946			344901
1249	0	5128	14946			150222
1250	0	5208	14946			428044
1251	0	5288	14946			2654.32
1252	0	5368	14946			2654.32
1253	0	5448	14946			198872
1254	0	5528	14946			2654.32
1255	0	5608	14946			2654.32
1256	0	5688	14946			189228
1257	0	5768	14946			312019
1258	0	5848	14946			192699
1259	0	5928	14946			383286
1260	0	6008	14946			725528
1261	0	6088	14946			470448
1262	0	6168	14946			504078
1263	0	6248	14946			464784
1264	0	6328	14946			182187
1265	0	6408	14946			332565
1266	0	6488	14946			218684
1267	0	6568	14946			321846
1268	0	6648	14946			268574
1269	0	6728	14946			291501
1270	0	6808	14946			299608
1271	0	6888	14946			294962
1272	0	6968	14946			162110
1273	0	7048	14946			2654.32
1274	0	7128	14946			250218
1275	0	7208	14946			290949
1276	0	7288	14946			194033
1277	0	7368	14946			163088
1278	0	7448	14946			220277
1279	0	7528	14946			183258
1280	0	7608	14946			220027
1281	0	7688	14946			177347
1282	0	7768	14946			2654.32
1283	0	7848	14946			2654.32
1284	0	7928	14946			2654.32
1285	0	8008	14946			254256
1286	0	8088	14946			155589
1287	0	8168	14946			178222
1288	0	8248	14946			2654.32
1289	0	8328	14946			2654.32
1290	0	8408	14946			2654.32
1291	0	8488	14946			2654.32
1292	0	8568	14946			2654.32
1293	0	8648	14946			87169
1294	0	8728	14946			63788.9
1295	0	8808	14946			58935.3
1296	0	8888	14946			2654.32
1297	0	968	14866			2654.32
1298	0	1048	14866			152268
1299	0	1128	14866			203278
1300	0	1208	14866			172382
1301	0	1288	14866			2654.32
1302	0	1368	14866			2654.32
1303	0	1448	14866			2654.32
1304	0	1528	14866			2654.32
1305	0	1608	14866			2654.32
1306	0	1688	14866			2654.32
1307	0	1768	14866			2654.32
1308	0	1848	14866			177066
1309	0	1928	14866			2654.32
1310	0	2008	14866			2654.32
1311	0	2088	14866			2654.32
1312	0	2168	14866			160360
1313	0	2248	14866			2654.32
1314	0	2328	14866			136943
1315	0	2408	14866			162591
1316	0	2488	14866			81968.6
1317	0	2568	14866			95531.4
1318	0	2648	14866			129870
1319	0	2728	14866			108000
1320	0	2808	14866			109409
1321	0	2888	14866			127202
1322	0	2968	14866			175086
1323	0	3048	14866			292895
1324	0	3128	14866			222091
1325	0	3208	14866			262914
1326	0	3288	14866			194492
1327	0	3368	14866			144640
1328	0	3448	14866			173667
1329	0	3528	14866			197308
1330	0	3608	14866			99452.3
1331	0	3688	14866			143891
1332	0	3768	14866			83154.8
1333	0	3848	14866			86824.1
1334	0	3928	14866			142176
1335	0	4008	14866			155276
1336	0	4088	14866			260211
1337	0	4168	14866			238521
1338	0	4248	14866			171749
1339	0	4328	14866			245902
1340	0	4408	14866			256031
1341	0	4488	14866			217784
1342	0	4568	14866			247418
1343	0	4648	14866			187245
1344	0	4728	14866			254907
1345	0	4808	14866			174749
1346	0	4888	14866			166506
1347	0	4968	14866			187905
1348	0	5048	14866			166390
1349	0	5128	14866			197558
1350	0	5208	14866			198023
1351	0	5288	14866			2654.32
1352	0	5368	14866			2654.32
1353	0	5448	14866			171583
1354	0	5528	14866			201688
1355	0	5608	14866			184819
1356	0	5688	14866			171688
1357	0	5768	14866			310523
1358	0	5848	14866			160244
1359	0	5928	14866			262661
1360	0	6008	14866			339273
1361	0	6088	14866			534744
1362	0	6168	14866			608449
1363	0	6248	14866			640981
1364	0	6328	14866			302555
1365	0	6408	14866			260904
1366	0	6488	14866			165129
1367	0	6568	14866			267497
1368	0	6648	14866			373008
1369	0	6728	14866			450669
1370	0	6808	14866			340444
1371	0	6888	14866			216846
1372	0	6968	14866			192545
1373	0	7048	14866			348511
1374	0	7128	14866			227243
1375	0	7208	14866			235079
1376	0	7288	14866			118590
1377	0	7368	14866			247110
1378	0	7448	14866			2654.32
1379	0	7528	14866			193268
1380	0	7608	14866			146032
1381	0	7688	14866			156094
1382	0	7768	14866			161414
1383	0	7848	14866			168699
1384	0	7928	14866			147366
1385	0	8008	14866			169922
1386	0	8088	14866			157148
1387	0	8168	14866			226426
1388	0	8248	14866			104695
1389	0	8328	14866			2654.32
1390	0	8408	14866			2654.32
1391	0	8488	14866			2654.32
1392	0	8568	14866			167667
1393	0	8648	14866			2654.32
1394	0	8728	14866			2654.32
1395	0	8808	14866			79549.4
1396	0	8888	14866			2654.32
1397	0	8968	14866			2654.32
1398	0	9048	14866			2654.32
1399	0	888	14786			2654.32
1400	0	968	14786			2654.32
1401	0	1048	14786			222096
1402	0	1128	14786			152333
1403	0	1208	14786			192076
1404	0	1288	14786			2654.32
1405	0	1368	14786			2654.32
1406	0	1448	14786			2654.32
1407	0	1528	14786			2654.32
1408	0	1608	14786			233098
1409	0	1688	14786			2654.32
1410	0	1768	14786			2654.32
1411	0	1848	14786			2654.32
1412	0	1928	14786			2654.32
1413	0	2008	14786			83103.6
1414	0	2088	14786			2654.32
1415	0	2168	14786			2654.32
1416	0	2248	14786			2654.32
1417	0	2328	14786			207307
1418	0	2408	14786			126405
1419	0	2488	14786			59813.6
1420	0	2568	14786			91651.7
1421	0	2648	14786			130393
1422	0	2728	14786			80550.4
1423	0	2808	14786			77987.4
1424	0	2888	14786			126540
1425	0	2968	14786			273016
1426	0	3048	14786			380701
1427	0	3128	14786			280648
1428	0	3208	14786			310923
1429	0	3288	14786			289724
1430	0	3368	14786			189686
1431	0	3448	14786			278255
1432	0	3528	14786			151853
1433	0	3608	14786			273842
1434	0	3688	14786			198654
1435	0	3768	14786			153108
1436	0	3848	14786			156806
1437	0	3928	14786			262272
1438	0	4008	14786			240290
1439	0	4088	14786			236054
1440	0	4168	14786			162032
1441	0	4248	14786			236538
1442	0	4328	14786			298997
1443	0	4408	14786			276810
1444	0	4488	14786			184314
1445	0	4568	14786			241532
1446	0	4648	14786			189283
1447	0	4728	14786			196272
1448	0	4808	14786			306834
1449	0	4888	14786			210039
1450	0	4968	14786			259222
1451	0	5048	14786			2654.32
1452	0	5128	14786			278375
1453	0	5208	14786			339679
1454	0	5288	14786			208014
1455	0	5368	14786			164562
1456	0	5448	14786			134401
1457	0	5528	14786			185519
1458	0	5608	14786			208229
1459	0	5688	14786			212178
1460	0	5768	14786			197473
1461	0	5848	14786			266277
1462	0	5928	14786			215258
1463	0	6008	14786			283023
1464	0	6088	14786			337762
1465	0	6168	14786			383307
1466	0	6248	14786			589295
1467	0	6328	14786			449347
1468	0	6408	14786			290219
1469	0	6488	14786			284034
1470	0	6568	14786			211388
1471	0	6648	14786			162017
1472	0	6728	14786			305089
1473	0	6808	14786			268683
1474	0	6888	14786			386802
1475	0	6968	14786			235850
1476	0	7048	14786			299090
1477	0	7128	14786			382732
1478	0	7208	14786			261282
1479	0	7288	14786			192470
1480	0	7368	14786			243739
1481	0	7448	14786			198069
1482	0	7528	14786			201200
1483	0	7608	14786			232933
1484	0	7688	14786			134962
1485	0	7768	14786			244924
1486	0	7848	14786			2654.32
1487	0	7928	14786			207569
1488	0	8008	14786			186380
1489	0	8088	14786			158248
1490	0	8168	14786			164347
1491	0	8248	14786			137229
1492	0	8328	14786			140551
1493	0	8408	14786			2654.32
1494	0	8488	14786			134218
1495	0	8568	14786			167495
1496	0	8648	14786			2654.32
1497	0	8728	14786			113943
1498	0	8808	14786			58068.9
1499	0	8888	14786			81422.6
1500	0	8968	14786			2654.32
1501	0	9048	14786			2654.32
1502	0	9128	14786			2654.32
1503	0	808	14706			2654.32
1504	0	888	14706			2654.32
1505	0	968	14706			2654.32
1506	0	1048	14706			2654.32
1507	0	1128	14706			185532
1508	0	1208	14706			154399
1509	0	1288	14706			2654.32
1510	0	1368	14706			2654.32
1511	0	1448	14706			2654.32
1512	0	1528	14706			2654.32
1513	0	1608	14706			2654.32
1514	0	1688	14706			2654.32
1515	0	1768	14706			2654.32
1516	0	1848	14706			161774
1517	0	1928	14706			2654.32
1518	0	2008	14706			19794.7
1519	0	2088	14706			2654.32
1520	0	2168	14706			2654.32
1521	0	2248	14706			179176
1522	0	2328	14706			92254.4
1523	0	2408	14706			141095
1524	0	2488	14706			127325
1525	0	2568	14706			121802
1526	0	2648	14706			168969
1527	0	2728	14706			77031.1
1528	0	2808	14706			2654.32
1529	0	2888	14706			107579
1530	0	2968	14706			281502
1531	0	3048	14706			385586
1532	0	3128	14706			386447
1533	0	3208	14706			479914
1534	0	3288	14706			571144
1535	0	3368	14706			359204
1536	0	3448	14706			289615
1537	0	3528	14706			303391
1538	0	3608	14706			202160
1539	0	3688	14706			202502
1540	0	3768	14706			198830
1541	0	3848	14706			157307
1542	0	3928	14706			216904
1543	0	4008	14706			276923
1544	0	4088	14706			265703
1545	0	4168	14706			279994
1546	0	4248	14706			312799
1547	0	4328	14706			139885
1548	0	4408	14706			204218
1549	0	4488	14706			233764
1550	0	4568	14706			285855
1551	0	4648	14706			250028
1552	0	4728	14706			282302
1553	0	4808	14706			267298
1554	0	4888	14706			260620
1555	0	4968	14706			189906
1556	0	5048	14706			344996
1557	0	5128	14706			283156
1558	0	5208	14706			192292
1559	0	5288	14706			202002
1560	0	5368	14706			2654.32
1561	0	5448	14706			324055
1562	0	5528	14706			209256
1563	0	5608	14706			127709
1564	0	5688	14706			257885
1565	0	5768	14706			236082
1566	0	5848	14706			198916
1567	0	5928	14706			298310
1568	0	6008	14706			2654.32
1569	0	6088	14706			156064
1570	0	6168	14706			224921
1571	0	6248	14706			300813
1572	0	6328	14706			369306
1573	0	6408	14706			231909
1574	0	6488	14706			152574
1575	0	6568	14706			165057
1576	0	6648	14706			267160
1577	0	6728	14706			165748
1578	0	6808	14706			211264
1579	0	6888	14706			320719
1580	0	6968	14706			260303
1581	0	7048	14706			230874
1582	0	7128	14706			204663
1583	0	7208	14706			172639
1584	0	7288	14706			261898
1585	0	7368	14706			233864
1586	0	7448	14706			261838
1587	0	7528	14706			307300
1588	0	7608	14706			160566
1589	0	7688	14706			2654.32
1590	0	7768	14706			210508
1591	0	7848	14706			233804
1592	0	7928	14706			2654.32
1593	0	8008	14706			156373
1594	0	8088	14706			2654.32
1595	0	8168	14706			2654.32
1596	0	8248	14706			2654.32
1597	0	8328	14706			176871
1598	0	8408	14706			2654.32
1599	0	8488	14706			2654.32
1600	0	8568	14706			2654.32
1601	0	8648	14706			2654.32
1602	0	8728	14706			2654.32
1603	0	8808	14706			2654.32
1604	0	8888	14706			2654.32
1605	0	8968	14706			97596.2
1606	0	9048	14706			2654.32
1607	0	9128	14706			2654.32
1608	0	728	14626			2654.32
1609	0	808	14626			2654.32
1610	0	888	14626			107462
1611	0	968	14626			2654.32
1612	0	1048	14626			2654.32
1613	0	1128	14626			2654.32
1614	0	1208	14626			74010.9
1615	0	1288	14626			2654.32
1616	0	1368	14626			2654.32
1617	0	1448	14626			2654.32
1618	0	1528	14626			2654.32
1619	0	1608	14626			2654.32
1620	0	1688	14626			2654.32
1621	0	1768	14626			2654.32
1622	0	1848	14626			154513
1623	0	1928	14626			129164
1624	0	2008	14626			2654.32
1625	0	2088	14626			103009
1626	0	2168	14626			2654.32
1627	0	2248	14626			82071.9
1628	0	2328	14626			115449
1629	0	2408	14626			146605
1630	0	2488	14626			224295
1631	0	2568	14626			159244
1632	0	2648	14626			183291
1633	0	2728	14626			75556
1634	0	2808	14626			135022
1635	0	2888	14626			270868
1636	0	2968	14626			168550
1637	0	3048	14626			179982
1638	0	3128	14626			330500
1639	0	3208	14626			538479
1640	0	3288	14626			338286
1641	0	3368	14626			617497
1642	0	3448	14626			504325
1643	0	3528	14626			452449
1644	0	3608	14626			378007
1645	0	3688	14626			218104
1646	0	3768	14626			242546
1647	0	3848	14626			244185
1648	0	3928	14626			145365
1649	0	4008	14626			191324
1650	0	4088	14626			189214
1651	0	4168	14626			182658
1652	0	4248	14626			276997
1653	0	4328	14626			308458
1654	0	4408	14626			339126
1655	0	4488	14626			322330
1656	0	4568	14626			320431
1657	0	4648	14626			318871
1658	0	4728	14626			318555
1659	0	4808	14626			370534
1660	0	4888	14626			300596
1661	0	4968	14626			323611
1662	0	5048	14626			294299
1663	0	5128	14626			222201
1664	0	5208	14626			331335
1665	0	5288	14626			180716
1666	0	5368	14626			195343
1667	0	5448	14626			264643
1668	0	5528	14626			238652
1669	0	5608	14626			2654.32
1670	0	5688	14626			434809
1671	0	5768	14626			233713
1672	0	5848	14626			213180
1673	0	5928	14626			314688
1674	0	6008	14626			279679
1675	0	6088	14626			154872
1676	0	6168	14626			275117
1677	0	6248	14626			332326
1678	0	6328	14626			299600
1679	0	6408	14626			277895
1680	0	6488	14626			124709
1681	0	6568	14626			195308
1682	0	6648	14626			218296
1683	0	6728	14626			2654.32
1684	0	6808	14626			169822
1685	0	6888	14626			167663
1686	0	6968	14626			185805
1687	0	7048	14626			2654.32
1688	0	7128	14626			190285
1689	0	7208	14626			201323
1690	0	7288	14626			2654.32
1691	0	7368	14626			148679
1692	0	7448	14626			273326
1693	0	7528	14626			197856
1694	0	7608	14626			2654.32
1695	0	7688	14626			2654.32
1696	0	7768	14626			223629
1697	0	7848	14626			149787
1698	0	7928	14626			2654.32
1699	0	8008	14626			163210
1700	0	8088	14626			2654.32
1701	0	8168	14626			2654.32
1702	0	8248	14626			219485
1703	0	8328	14626			208175
1704	0	8408	14626			142286
1705	0	8488	14626			165847
1706	0	8568	14626			2654.32
1707	0	8648	14626			172606
1708	0	8728	14626			126719
1709	0	8808	14626			116979
1710	0	8888	14626			2654.32
1711	0	8968	14626			2654.32
1712	0	9048	14626			143830
1713	0	9128	14626			2654.32
1714	0	728	14546			2654.32
1715	0	808	14546			2654.32
1716	0	888	14546			106617
1717	0	968	14546			115229
1718	0	1048	14546			80143.7
1719	0	1128	14546			52624.4
1720	0	1208	14546			52041.5
1721	0	1288	14546			90926.5
1722	0	1368	14546			2654.32
1723	0	1448	14546			140236
1724	0	1528	14546			220378
1725	0	1608	14546			2654.32
1726	0	1688	14546			2654.32
1727	0	1768	14546			192037
1728	0	1848	14546			2654.32
1729	0	1928	14546			129923
1730	0	2008	14546			141144
1731	0	2088	14546			2654.32
1732	0	2168	14546			2654.32
1733	0	2248	14546			137152
1734	0	2328	14546			139244
1735	0	2408	14546			127016
1736	0	2488	14546			165549
1737	0	2568	14546			130675
1738	0	2648	14546			176875
1739	0	2728	14546			171072
1740	0	2808	14546			194078
1741	0	2888	14546			272202
1742	0	2968	14546			201219
1743	0	3048	14546			167587
1744	0	3128	14546			275794
1745	0	3208	14546			437563
1746	0	3288	14546			447806
1747	0	3368	14546			517876
1748	0	3448	14546			365477
1749	0	3528	14546			414513
1750	0	3608	14546			540939
1751	0	3688	14546			625079
1752	0	3768	14546			490345
1753	0	3848	14546			199968
1754	0	3928	14546			251500
1755	0	4008	14546			2654.32
1756	0	4088	14546			226517
1757	0	4168	14546			254154
1758	0	4248	14546			2654.32
1759	0	4328	14546			329810
1760	0	4408	14546			244703
1761	0	4488	14546			283598
1762	0	4568	14546			423261
1763	0	4648	14546			406853
1764	0	4728	14546			286410
1765	0	4808	14546			296894
1766	0	4888	14546			289610
1767	0	4968	14546			327630
1768	0	5048	14546			272850
1769	0	5128	14546			252937
1770	0	5208	14546			214479
1771	0	5288	14546			262595
1772	0	5368	14546			223572
1773	0	5448	14546			207356
1774	0	5528	14546			173290
1775	0	5608	14546			294178
1776	0	5688	14546			368339
1777	0	5768	14546			277146
1778	0	5848	14546			285201
1779	0	5928	14546			210494
1780	0	6008	14546			226421
1781	0	6088	14546			256360
1782	0	6168	14546			446718
1783	0	6248	14546			394486
1784	0	6328	14546			371766
1785	0	6408	14546			194585
1786	0	6488	14546			148609
1787	0	6568	14546			143848
1788	0	6648	14546			135797
1789	0	6728	14546			176451
1790	0	6808	14546			180667
1791	0	6888	14546			2654.32
1792	0	6968	14546			161523
1793	0	7048	14546			2654.32
1794	0	7128	14546			139568
1795	0	7208	14546			2654.32
1796	0	7288	14546			188366
1797	0	7368	14546			2654.32
1798	0	7448	14546			2654.32
1799	0	7528	14546			2654.32
1800	0	7608	14546			2654.32
1801	0	7688	14546			2654.32
1802	0	7768	14546			2654.32
1803	0	7848	14546			2654.32
1804	0	7928	14546			162160
1805	0	8008	14546			293369
1806	0	8088	14546			193109
1807	0	8168	14546			140451
1808	0	8248	14546			260944
1809	0	8328	14546			2654.32
1810	0	8408	14546			2654.32
1811	0	8488	14546			2654.32
1812	0	8568	14546			187406
1813	0	8648	14546			143865
1814	0	8728	14546			207845
1815	0	8808	14546			154784
1816	0	8888	14546			2654.32
1817	0	8968	14546			2654.32
1818	0	9048	14546			65065.7
1819	0	9128	14546			2654.32
1820	0	9208	14546			2654.32
1821	0	648	14466			2654.32
1822	0	728	14466			2654.32
1823	0	808	14466			2654.32
1824	0	888	14466			2654.32
1825	0	968	14466			169557
1826	0	1048	14466			144300
1827	0	1128	14466			125352
1828	0	1208	14466			2654.32
1829	0	1288	14466			2654.32
1830	0	1368	14466			2654.32
1831	0	1448	14466			112194
1832	0	1528	14466			2654.32
1833	0	1608	14466			2654.32
1834	0	1688	14466			2654.32
1835	0	1768	14466			2654.32
1836	0	1848	14466			2654.32
1837	0	1928	14466			2654.32
1838	0	2008	14466			2654.32
1839	0	2088	14466			2654.32
1840	0	2168	14466			183880
1841	0	2248	14466			117351
1842	0	2328	14466			117953
1843	0	2408	14466			146939
1844	0	2488	14466			184866
1845	0	2568	14466			246152
1846	0	2648	14466			119029
1847	0	2728	14466			296145
1848	0	2808	14466			259857
1849	0	2888	14466			260735
1850	0	2968	14466			153298
1851	0	3048	14466			170652
1852	0	3128	14466			308942
1853	0	3208	14466			351067
1854	0	3288	14466			318113
1855	0	3368	14466			367285
1856	0	3448	14466			345448
1857	0	3528	14466			397552
1858	0	3608	14466			549955
1859	0	3688	14466			398350
1860	0	3768	14466			342086
1861	0	3848	14466			261020
1862	0	3928	14466			259868
1863	0	4008	14466			300595
1864	0	4088	14466			315416
1865	0	4168	14466			389324
1866	0	4248	14466			140367
1867	0	4328	14466			275200
1868	0	4408	14466			360788
1869	0	4488	14466			259718
1870	0	4568	14466			364619
1871	0	4648	14466			325246
1872	0	4728	14466			327044
1873	0	4808	14466			629805
1874	0	4888	14466			316082
1875	0	4968	14466			617365
1876	0	5048	14466			220968
1877	0	5128	14466			233939
1878	0	5208	14466			300626
1879	0	5288	14466			303015
1880	0	5368	14466			186864
1881	0	5448	14466			243005
1882	0	5528	14466			210100
1883	0	5608	14466			253927
1884	0	5688	14466			250337
1885	0	5768	14466			302178
1886	0	5848	14466			281434
1887	0	5928	14466			335900
1888	0	6008	14466			378785
1889	0	6088	14466			228250
1890	0	6168	14466			458659
1891	0	6248	14466			332935
1892	0	6328	14466			277938
1893	0	6408	14466			412378
1894	0	6488	14466			167723
1895	0	6568	14466			148625
1896	0	6648	14466			162271
1897	0	6728	14466			142863
1898	0	6808	14466			231018
1899	0	6888	14466			217805
1900	0	6968	14466			170976
1901	0	7048	14466			2654.32
1902	0	7128	14466			191468
1903	0	7208	14466			237929
1904	0	7288	14466			225760
1905	0	7368	14466			2654.32
1906	0	7448	14466			2654.32
1907	0	7528	14466			2654.32
1908	0	7608	14466			2654.32
1909	0	7688	14466			2654.32
1910	0	7768	14466			2654.32
1911	0	7848	14466			164337
1912	0	7928	14466			170357
1913	0	8008	14466			216586
1914	0	8088	14466			163399
1915	0	8168	14466			2654.32
1916	0	8248	14466			2654.32
1917	0	8328	14466			2654.32
1918	0	8408	14466			2654.32
1919	0	8488	14466			2654.32
1920	0	8568	14466			216137
1921	0	8648	14466			2654.32
1922	0	8728	14466			2654.32
1923	0	8808	14466			2654.32
1924	0	8888	14466			2654.32
1925	0	8968	14466			2654.32
1926	0	9048	14466			130215
1927	0	9128	14466			146625
1928	0	9208	14466			2654.32
1929	0	568	14386			2654.32
1930	0	648	14386			2654.32
1931	0	728	14386			2654.32
1932	0	808	14386			2654.32
1933	0	888	14386			2654.32
1934	0	968	14386			104139
1935	0	1048	14386			115457
1936	0	1128	14386			76288.5
1937	0	1208	14386			92808.3
1938	0	1288	14386			2654.32
1939	0	1368	14386			2654.32
1940	0	1448	14386			133224
1941	0	1528	14386			2654.32
1942	0	1608	14386			2654.32
1943	0	1688	14386			2654.32
1944	0	1768	14386			2654.32
1945	0	1848	14386			2654.32
1946	0	1928	14386			2654.32
1947	0	2008	14386			116971
1948	0	2088	14386			128245
1949	0	2168	14386			179275
1950	0	2248	14386			141663
1951	0	2328	14386			140132
1952	0	2408	14386			94050.5
1953	0	2488	14386			98935.3
1954	0	2568	14386			175306
1955	0	2648	14386			205126
1956	0	2728	14386			289631
1957	0	2808	14386			241095
1958	0	2888	14386			252155
1959	0	2968	14386			276589
1960	0	3048	14386			316683
1961	0	3128	14386			299256
1962	0	3208	14386			269391
1963	0	3288	14386			367012
1964	0	3368	14386			294280
1965	0	3448	14386			230306
1966	0	3528	14386			216239
1967	0	3608	14386			235112
1968	0	3688	14386			213474
1969	0	3768	14386			404547
1970	0	3848	14386			306167
1971	0	3928	14386			179833
1972	0	4008	14386			187137
1973	0	4088	14386			281580
1974	0	4168	14386			206808
1975	0	4248	14386			2654.32
1976	0	4328	14386			312594
1977	0	4408	14386			313137
1978	0	4488	14386			438371
1979	0	4568	14386			342380
1980	0	4648	14386			260273
1981	0	4728	14386			377707
1982	0	4808	14386			296791
1983	0	4888	14386			379440
1984	0	4968	14386			339276
1985	0	5048	14386			218349
1986	0	5128	14386			324597
1987	0	5208	14386			307912
1988	0	5288	14386			349564
1989	0	5368	14386			344919
1990	0	5448	14386			250455
1991	0	5528	14386			296263
1992	0	5608	14386			175619
1993	0	5688	14386			337350
1994	0	5768	14386			151002
1995	0	5848	14386			171948
1996	0	5928	14386			191434
1997	0	6008	14386			220591
1998	0	6088	14386			444347
[truncated: 50,088 more rows]

## Sheet: Fig S8 B-F
spotId	raster	x	y	z	Date	N-Acetylaspartylglutamate	N-Acetylaspartate	Glutamine	Aspartate	Glutamate
14	Regions/clus7	4808	16226	0		2654.32	2.08356e+06	297320	329279	813567
149	Regions/clus7	4328	15986	0		261717	20301940	1.76914e+06	2497664	5.93216e+06
184	Regions/clus7	7128	15986	0		2654.32	1607605	181057	159320	614238
211	Regions/clus7	3848	15906	0		250308	19640758	2.00326e+06	2.52527e+06	6957630
214	Regions/clus7	4088	15906	0		204201	20619404	2.29636e+06	2.76548e+06	7.83461e+06
237	Regions/clus7	5928	15906	0		2654.32	9135050	955679	1.07961e+06	2.96937e+06
306	Regions/clus7	5688	15826	0		2654.32	16197785	1.23183e+06	2.25675e+06	5.54024e+06
312	Regions/clus7	6168	15826	0		2654.32	14239014	1.24415e+06	1.44585e+06	4.80794e+06
359	Regions/clus7	4008	15746	0		161502	24762756	2.11668e+06	3548553	8760327
382	Regions/clus7	5848	15746	0		197914	16228388	1.4185e+06	2.12599e+06	5.92338e+06
385	Regions/clus7	6088	15746	0		121329	18004764	1.55307e+06	2.11014e+06	6.1943e+06
431	Regions/clus7	3608	15666	0		220830	36421996	3.23308e+06	4.2155e+06	11001081
432	Regions/clus7	3688	15666	0		266263	30502388	2464857	3560607	9964698
459	Regions/clus7	5848	15666	0		2654.32	15664589	1.58582e+06	2.14233e+06	5.57881e+06
460	Regions/clus7	5928	15666	0		193442	16272781	1.45465e+06	2.16886e+06	5.47567e+06
511	Regions/clus7	3688	15586	0		264606	28536166	2.83303e+06	3.54331e+06	9459652
1197	Regions/clus7	968	14946	0		2654.32	16191236	2.31674e+06	2.86394e+06	6354088
1296	Regions/clus7	8888	14946	0		2654.32	2.40153e+06	294822	474926	915902
1397	Regions/clus7	8968	14866	0		2654.32	1.10542e+06	125728	137802	356183
1607	Regions/clus7	9128	14706	0		2654.32	1.96033e+06	197218	349651	763474
1658	Regions/clus7	4728	14626	0		318555	25979734	3.54742e+06	3.1905e+06	10040378
1768	Regions/clus7	5048	14546	0		272850	23694648	3.343e+06	3.41628e+06	9797686
1823	Regions/clus7	808	14466	0		2654.32	8555505	1.23065e+06	1257188	4.0298e+06
1871	Regions/clus7	4648	14466	0		325246	22934088	2.83199e+06	3325969	8846635
1987	Regions/clus7	5208	14386	0		307912	22875010	2953358	3.58898e+06	8904830
2094	Regions/clus7	4968	14306	0		287166	17609042	2.61251e+06	2.75232e+06	8.30184e+06
2264	Regions/clus7	808	14146	0		2654.32	8271023	977706	1.13455e+06	3687871
2489	Regions/clus7	728	13986	0		2654.32	5756798	748237	888863	2334067
2490	Regions/clus7	808	13986	0		2654.32	5844036	621186	971518	2.46314e+06
2603	Regions/clus7	728	13906	0		2654.32	5.52065e+06	614357	1.22033e+06	3496359
2604	Regions/clus7	808	13906	0		2654.32	7.96814e+06	872603	1.09911e+06	3.44708e+06
2719	Regions/clus7	808	13826	0		2654.32	6.8177e+06	1.20756e+06	1.29578e+06	3.74745e+06
2834	Regions/clus7	808	13746	0		2654.32	7563456	1.38515e+06	1.517e+06	4.50765e+06
2881	Regions/clus7	4568	13746	0		297673	14619015	1.91402e+06	2.33184e+06	6.69548e+06
2943	Regions/clus7	9528	13746	0		2654.32	4283748	776001	738389	2.13141e+06
2951	Regions/clus7	808	13666	0		2654.32	7.23955e+06	1.3144e+06	1.31576e+06	4.24249e+06
3000	Regions/clus7	4728	13666	0		394207	16609836	2402767	3.10141e+06	7.11572e+06
3068	Regions/clus7	808	13586	0		2654.32	7.25546e+06	1.55754e+06	1.27202e+06	4.70982e+06
3233	Regions/clus7	4648	13506	0		357067	17443144	1.93465e+06	2.6585e+06	7798348
3351	Regions/clus7	4648	13426	0		430166	17272226	1.88135e+06	2.59615e+06	7.4279e+06
3352	Regions/clus7	4728	13426	0		372483	20536474	2.76056e+06	2.85218e+06	9848391
3421	Regions/clus7	808	13346	0		2654.32	8808729	1.39059e+06	1.65573e+06	4392199
3540	Regions/clus7	808	13266	0		2654.32	8072048	1.62376e+06	2.25446e+06	5668467
3588	Regions/clus7	4648	13266	0		218812	15938558	1.89907e+06	2416934	7.18733e+06
3780	Regions/clus7	808	13106	0		252071	6.60704e+06	1.73668e+06	1.72709e+06	5.54497e+06
3882	Regions/clus7	8968	13106	0		230510	28841504	3.29233e+06	4327542	12079437
3899	Regions/clus7	728	13026	0		2654.32	5.50782e+06	1.12139e+06	1562483	3.96361e+06
3900	Regions/clus7	808	13026	0		2654.32	7.8119e+06	1.75062e+06	1.91772e+06	4.53136e+06
4001	Regions/clus7	8888	13026	0		132361	25643420	3.37313e+06	3.7603e+06	11798872
4002	Regions/clus7	8968	13026	0		220630	26356124	3.14492e+06	4.18259e+06	11525995
4026	Regions/clus7	1368	12946	0		229376	13832347	2.19603e+06	1.91334e+06	5.70072e+06
4119	Regions/clus7	8808	12946	0		232023	17491736	2.42443e+06	3.04108e+06	8143242
4120	Regions/clus7	8888	12946	0		141184	22466576	2.62244e+06	3603185	9730698
4121	Regions/clus7	8968	12946	0		259431	23024790	3.1762e+06	3.66955e+06	10306837
4129	Regions/clus7	9608	12946	0		2654.32	1.1387e+06	148508	141978	473480
4138	Regions/clus7	808	12866	0		2654.32	9991505	2178661	1988435	5.82457e+06
4139	Regions/clus7	888	12866	0		330351	23144996	4.00544e+06	4.16832e+06	11594484
4144	Regions/clus7	1288	12866	0		250728	18455858	3351134	2.55796e+06	8201211
4187	Regions/clus7	4728	12866	0		325644	15527540	2.09625e+06	2.17209e+06	6436545
4237	Regions/clus7	8728	12866	0		2654.32	18182102	2.33168e+06	2.82306e+06	8791226
4238	Regions/clus7	8808	12866	0		244433	18261668	2.88723e+06	3.01406e+06	8532764
4239	Regions/clus7	8888	12866	0		159420	17621990	2256336	2.88521e+06	8979255
4240	Regions/clus7	8968	12866	0		224242	24831186	3022196	3.4536e+06	10747857
4258	Regions/clus7	888	12786	0		321412	26285466	4.6954e+06	4.1346e+06	12216812
4261	Regions/clus7	1128	12786	0		234144	15828325	3.1673e+06	2.50626e+06	8256868
4304	Regions/clus7	4568	12786	0		292290	17670380	2.43578e+06	2.36751e+06	7273759
4307	Regions/clus7	4808	12786	0		461166	17427194	2.60892e+06	2.45195e+06	7772458
4355	Regions/clus7	8648	12786	0		278914	19798630	2.79859e+06	2.98572e+06	9700275
4356	Regions/clus7	8728	12786	0		210797	21345946	2.97575e+06	3.57499e+06	9341753
4357	Regions/clus7	8808	12786	0		265832	21678998	3.12322e+06	3.546e+06	10982788
4358	Regions/clus7	8888	12786	0		174805	17957562	3.00627e+06	3.09182e+06	8927282
4364	Regions/clus7	9368	12786	0		175236	18744852	1.62543e+06	1.72991e+06	5.86257e+06
4377	Regions/clus7	888	12706	0		366822	22682864	4580014	3.52005e+06	11286756
4422	Regions/clus7	4488	12706	0		594790	19365056	2694035	2893663	7.9777e+06
4427	Regions/clus7	4888	12706	0		344744	19519078	2.38733e+06	2.75312e+06	7899485
4428	Regions/clus7	4968	12706	0		441707	13739620	1.54616e+06	1.78994e+06	5.27007e+06
4474	Regions/clus7	8648	12706	0		262870	19640862	2.82426e+06	2.77349e+06	9923959
4475	Regions/clus7	8728	12706	0		281087	21727482	3.51093e+06	3.48409e+06	10361249
4476	Regions/clus7	8808	12706	0		197977	19725228	2.9837e+06	3.0313e+06	9831609
4477	Regions/clus7	8888	12706	0		300048	27862558	3.87336e+06	4.04539e+06	12939131
4478	Regions/clus7	8968	12706	0		411788	27395226	3.5319e+06	3.96923e+06	12855545
4495	Regions/clus7	728	12626	0		2654.32	10137050	2.09694e+06	1.61379e+06	6.6546e+06
4497	Regions/clus7	888	12626	0		295433	20614302	4.4984e+06	4.04894e+06	13214103
4503	Regions/clus7	1368	12626	0		478420	21263844	4.0497e+06	2841329	9636548
4543	Regions/clus7	4568	12626	0		574980	20030814	2407814	3.10106e+06	7.28903e+06
4544	Regions/clus7	4648	12626	0		381938	15719712	2103400	2.15557e+06	6340326
4545	Regions/clus7	4728	12626	0		346748	17861196	2.42359e+06	2446487	6.79194e+06
4546	Regions/clus7	4808	12626	0		611782	22077138	2749047	2.96775e+06	8.25478e+06
4547	Regions/clus7	4888	12626	0		394285	19460532	2.86507e+06	2.93933e+06	7859616
4593	Regions/clus7	8568	12626	0		246699	16797818	2626542	2.68622e+06	8708279
4594	Regions/clus7	8648	12626	0		221958	19538058	3.01369e+06	3.10327e+06	9080834
4595	Regions/clus7	8728	12626	0		288487	22411176	3.30473e+06	3.67176e+06	10336170
4596	Regions/clus7	8808	12626	0		345304	28016964	3.78969e+06	4.49632e+06	13613582
4597	Regions/clus7	8888	12626	0		228384	25378396	3.80846e+06	3.97492e+06	12433341
4598	Regions/clus7	8968	12626	0		433151	38752192	4.10203e+06	4.21788e+06	16115800
4616	Regions/clus7	888	12546	0		303823	17928660	3480935	3075330	9408708
4619	Regions/clus7	1128	12546	0		516571	17609150	3.58284e+06	2.45241e+06	9845101
4620	Regions/clus7	1208	12546	0		510248	17360336	3749935	2.10939e+06	9195318
4662	Regions/clus7	4568	12546	0		720871	21638900	2.56759e+06	2.99108e+06	7256203
4664	Regions/clus7	4728	12546	0		778652	19812910	2.59017e+06	2953294	7.71927e+06
4665	Regions/clus7	4808	12546	0		497073	18096470	2.34969e+06	2.56331e+06	6868387
4666	Regions/clus7	4888	12546	0		369159	15269570	2.14647e+06	2147163	6133454
4711	Regions/clus7	8488	12546	0		392959	21530356	3172879	2.86254e+06	9396392
4712	Regions/clus7	8568	12546	0		237725	16308525	2473911	2.56289e+06	7.68492e+06
4713	Regions/clus7	8648	12546	0		181539	18114946	2674690	3.16584e+06	8600732
4714	Regions/clus7	8728	12546	0		255811	18706758	3.32684e+06	3.30262e+06	8894351
4717	Regions/clus7	8968	12546	0		395352	44331868	4.5135e+06	5211693	17385046
4723	Regions/clus7	9448	12546	0		94742.1	16002626	2.0005e+06	2.2612e+06	7669382
4734	Regions/clus7	808	12466	0		2654.32	11947518	2.06376e+06	2.04826e+06	7151036
4735	Regions/clus7	888	12466	0		317884	16887444	3.05377e+06	3.02125e+06	9495599
4736	Regions/clus7	968	12466	0		217814	13722586	3.04101e+06	2220748	8086516
4741	Regions/clus7	1368	12466	0		483005	18542738	3.49753e+06	2387800	8808592
4780	Regions/clus7	4488	12466	0		762685	19615902	2.58696e+06	2.69513e+06	6.96452e+06
4782	Regions/clus7	4648	12466	0		446543	18436622	2.17476e+06	2.78157e+06	5.59415e+06
4783	Regions/clus7	4728	12466	0		423993	17685794	2.09352e+06	2.50172e+06	6.67457e+06
4784	Regions/clus7	4808	12466	0		761470	20122848	2.79497e+06	2.74917e+06	7273226
4785	Regions/clus7	4888	12466	0		741550	20332686	3149600	3.38917e+06	7977518
4786	Regions/clus7	4968	12466	0		410629	16546325	2.61371e+06	2797968	6413951
4823	Regions/clus7	7928	12466	0		223668	20496228	2.73544e+06	2.6718e+06	8.00065e+06
4824	Regions/clus7	8008	12466	0		176056	20576422	3.24412e+06	3133164	8796840
4825	Regions/clus7	8088	12466	0		185396	17526790	3.10247e+06	2.86213e+06	7885381
4827	Regions/clus7	8248	12466	0		2654.32	11741098	1994696	2.04897e+06	6.44135e+06
4831	Regions/clus7	8568	12466	0		218044	16998232	2.79536e+06	2.78282e+06	8881039
4832	Regions/clus7	8648	12466	0		186443	16129971	2.72737e+06	2.9229e+06	8304598
4833	Regions/clus7	8728	12466	0		190712	20443820	3.28802e+06	2.90541e+06	10160676
4834	Regions/clus7	8808	12466	0		255168	18780698	2434633	2.92475e+06	8874455
4835	Regions/clus7	8888	12466	0		231102	22930298	3.12237e+06	3.22629e+06	10709467
4842	Regions/clus7	9448	12466	0		2654.32	8297576	1.37031e+06	1.48242e+06	5.07326e+06
4843	Regions/clus7	9528	12466	0		2654.32	4597049	908847	934234	2826858
4855	Regions/clus7	968	12386	0		322114	19250848	3.65713e+06	3.05758e+06	10669203
4856	Regions/clus7	1048	12386	0		298627	15156637	3.24327e+06	2.33918e+06	8086162
4859	Regions/clus7	1288	12386	0		440606	16311826	3.55076e+06	2.25203e+06	8391347
4860	Regions/clus7	1368	12386	0		489553	15045963	3369558	1.98931e+06	8049232
4887	Regions/clus7	3528	12386	0		314158	4.95531e+06	857723	675897	1.89239e+06
4900	Regions/clus7	4568	12386	0		639294	19034852	2.3273e+06	3.00325e+06	6502831
4901	Regions/clus7	4648	12386	0		590264	18746520	2.23446e+06	3.00064e+06	6.15249e+06
4902	Regions/clus7	4728	12386	0		573446	20953490	2.5237e+06	2.78855e+06	6.71925e+06
4940	Regions/clus7	7768	12386	0		340598	20062716	2.95315e+06	2.53916e+06	8.02923e+06
4941	Regions/clus7	7848	12386	0		344063	19015620	3.3856e+06	2.94903e+06	9141302
4942	Regions/clus7	7928	12386	0		444387	19625734	3.38155e+06	3.24673e+06	9336908
4944	Regions/clus7	8088	12386	0		240053	19081058	3.42098e+06	2.93484e+06	9989871
4946	Regions/clus7	8248	12386	0		266536	14545317	3059516	2.24188e+06	7346044
4949	Regions/clus7	8488	12386	0		204462	14958876	2.77125e+06	2.37022e+06	8.0928e+06
4950	Regions/clus7	8568	12386	0		369385	20175608	2.83327e+06	2.71243e+06	9574221
4951	Regions/clus7	8648	12386	0		174072	17407302	2.17808e+06	2.89828e+06	7817680
4952	Regions/clus7	8728	12386	0		230415	16884054	2.4197e+06	2.50214e+06	7874837
4953	Regions/clus7	8808	12386	0		219542	21719638	2938517	3.12725e+06	10257186
4954	Regions/clus7	8888	12386	0		186749	24397788	3.07506e+06	3.46087e+06	10811846
4962	Regions/clus7	9528	12386	0		2654.32	1.24046e+06	154106	119572	473166
4973	Regions/clus7	968	12306	0		283031	16801560	3875659	2.26086e+06	8739323
4974	Regions/clus7	1048	12306	0		334381	14239536	2601992	2.15089e+06	7867960
4975	Regions/clus7	1128	12306	0		251146	13584588	2866000	1.93027e+06	6.51189e+06
5018	Regions/clus7	4568	12306	0		861286	18195764	2303590	2877685	5.55698e+06
5019	Regions/clus7	4648	12306	0		643785	18115292	2.44656e+06	2825215	5806140
5020	Regions/clus7	4728	12306	0		671618	18149392	2435934	2.44281e+06	6070270
5056	Regions/clus7	7608	12306	0		210771	15342158	2.49997e+06	2.45671e+06	7.07417e+06
5057	Regions/clus7	7688	12306	0		427563	16431525	2.541e+06	2.65375e+06	7.30713e+06
5058	Regions/clus7	7768	12306	0		343812	17812418	3.23579e+06	2.90456e+06	8681046
5059	Regions/clus7	7848	12306	0		445898	23399812	3.77627e+06	3.26391e+06	10751932
5060	Regions/clus7	7928	12306	0		234938	17011496	3.00854e+06	3.07985e+06	8796454
5061	Regions/clus7	8008	12306	0		263203	20513882	3247386	2.7815e+06	9463015
5062	Regions/clus7	8088	12306	0		259480	19644402	3286880	3263837	9507095
5063	Regions/clus7	8168	12306	0		224147	16547820	2706406	2.49274e+06	8.28122e+06
5064	Regions/clus7	8248	12306	0		224373	16880788	3.40193e+06	2756200	9070681
5066	Regions/clus7	8408	12306	0		260697	15309947	2745006	2563640	7.62403e+06
5067	Regions/clus7	8488	12306	0		2654.32	14873483	2.51189e+06	2.37864e+06	7551128
5068	Regions/clus7	8568	12306	0		232967	15111147	2.5224e+06	2553355	7665846
5069	Regions/clus7	8648	12306	0		176723	20449766	2.89896e+06	2.93465e+06	9243418
5070	Regions/clus7	8728	12306	0		251936	17431836	2172810	3059680	8578165
5071	Regions/clus7	8808	12306	0		341003	19822062	2.92448e+06	2.9749e+06	9253205
5072	Regions/clus7	8888	12306	0		240872	22533828	2.90205e+06	2999881	9270760
5073	Regions/clus7	8968	12306	0		287012	23748832	2.94478e+06	2638541	9873660
5089	Regions/clus7	808	12226	0		207495	15566535	3.0167e+06	2.82586e+06	8850698
5091	Regions/clus7	968	12226	0		420945	19712802	3.44042e+06	3.24681e+06	10599774
5092	Regions/clus7	1048	12226	0		430268	14551333	3.10924e+06	2.11441e+06	8943444
5093	Regions/clus7	1128	12226	0		475229	15953127	3447057	2.57101e+06	9096449
5135	Regions/clus7	4488	12226	0		753389	16039770	2.58607e+06	2.76406e+06	4955636
5136	Regions/clus7	4568	12226	0		1.0121e+06	21029486	3.08479e+06	3235319	6817207
5137	Regions/clus7	4648	12226	0		586217	14562547	1.97937e+06	2.61798e+06	4.37699e+06
5138	Regions/clus7	4728	12226	0		556410	17212676	2346048	2.45832e+06	5877479
5139	Regions/clus7	4808	12226	0		876378	20427188	2569867	2.80647e+06	6374912
5173	Regions/clus7	7528	12226	0		578514	20353252	3.12024e+06	3.28159e+06	9112314
5174	Regions/clus7	7608	12226	0		354880	19697506	3.44297e+06	3.46892e+06	7.83446e+06
5175	Regions/clus7	7688	12226	0		289338	17885948	2922269	2.95966e+06	8.02035e+06
5176	Regions/clus7	7768	12226	0		379657	18585296	3.05837e+06	2.84554e+06	8478586
5177	Regions/clus7	7848	12226	0		286856	20958564	3.02119e+06	3.39181e+06	9450995
5178	Regions/clus7	7928	12226	0		494906	21823270	3734759	3404076	11141466
5179	Regions/clus7	8008	12226	0		379167	18355142	3.62919e+06	3.22804e+06	9201243
5180	Regions/clus7	8088	12226	0		311864	17623586	3402391	2.5752e+06	9414271
5181	Regions/clus7	8168	12226	0		187866	16156470	3.02867e+06	2731249	8237927
5182	Regions/clus7	8248	12226	0		335933	17884886	2.75393e+06	2.75634e+06	8518845
5184	Regions/clus7	8408	12226	0		228404	15280046	2.40549e+06	2.2295e+06	7085065
5185	Regions/clus7	8488	12226	0		296545	16987376	3.12432e+06	2.80468e+06	8755033
5186	Regions/clus7	8568	12226	0		161666	18388258	2904564	2920550	9119432
5188	Regions/clus7	8728	12226	0		248661	17423430	2.51926e+06	2240555	7549786
5189	Regions/clus7	8808	12226	0		221971	17884358	2.28954e+06	2.76419e+06	8328328
5190	Regions/clus7	8888	12226	0		233341	19399312	2.4835e+06	2.41997e+06	8034455
5191	Regions/clus7	8968	12226	0		358843	24065488	2.59333e+06	2.6749e+06	9562702
5196	Regions/clus7	9368	12226	0		124604	15453507	2.0509e+06	2.03457e+06	7.05153e+06
5197	Regions/clus7	9448	12226	0		44498.3	2.9069e+06	570209	492566	1.62922e+06
5204	Regions/clus7	728	12146	0		2654.32	6.78736e+06	1.5407e+06	1.24009e+06	4740085
5205	Regions/clus7	808	12146	0		302596	19154794	3654408	2.94449e+06	10971290
5207	Regions/clus7	968	12146	0		412299	18836034	3957018	2.9732e+06	11629086
5208	Regions/clus7	1048	12146	0		473651	16054481	3.15845e+06	2.66793e+06	10003861
5209	Regions/clus7	1128	12146	0		445056	13902650	3052062	2.43505e+06	8.14047e+06
5251	Regions/clus7	4488	12146	0		879454	18580352	2.6872e+06	3.2523e+06	6207172
5253	Regions/clus7	4648	12146	0		743820	18280482	2.73615e+06	2.6629e+06	5724545
5254	Regions/clus7	4728	12146	0		540806	15670978	2.14602e+06	2.72427e+06	4926279
5255	Regions/clus7	4808	12146	0		1.13865e+06	23046466	3235612	4013568	7341538
5288	Regions/clus7	7448	12146	0		617352	19377518	3.69166e+06	3293138	8534869
5289	Regions/clus7	7528	12146	0		476936	21334856	3.76516e+06	3.71886e+06	9280227
5290	Regions/clus7	7608	12146	0		274165	20227230	3.14195e+06	3094269	9604972
5292	Regions/clus7	7768	12146	0		345021	15242006	2.543e+06	2.43139e+06	7076612
5294	Regions/clus7	7928	12146	0		270900	16300024	3.01653e+06	2703788	8021354
5295	Regions/clus7	8008	12146	0		332784	21252088	3.33555e+06	3.1941e+06	11572627
5296	Regions/clus7	8088	12146	0		305444	19293048	3.01945e+06	3.4129e+06	9213293
5297	Regions/clus7	8168	12146	0		219106	15617093	2.95112e+06	2.67952e+06	8.08072e+06
5298	Regions/clus7	8248	12146	0		347801	22220184	3.66918e+06	3205664	10547676
5300	Regions/clus7	8408	12146	0		262602	16850238	2846551	2.42525e+06	8.24384e+06
5302	Regions/clus7	8568	12146	0		307610	18392878	2703902	2.77402e+06	8793900
5303	Regions/clus7	8648	12146	0		370172	19764318	2.76163e+06	2592091	8813683
5304	Regions/clus7	8728	12146	0		257055	18442520	2438969	2.46377e+06	7417062
5306	Regions/clus7	8888	12146	0		188764	16935540	2.30016e+06	2.55914e+06	7.64747e+06
5307	Regions/clus7	8968	12146	0		271753	21316366	2.26779e+06	2.31562e+06	7.10709e+06
5312	Regions/clus7	9368	12146	0		132610	10108069	1.6337e+06	1.55273e+06	5619548
5322	Regions/clus7	888	12066	0		596057	28951986	5331643	4363618	16598733
5323	Regions/clus7	968	12066	0		501199	21214410	4.18478e+06	3.67713e+06	12089259
5324	Regions/clus7	1048	12066	0		510013	17438610	3.58119e+06	2730383	10656634
5325	Regions/clus7	1128	12066	0		506852	16160915	3120665	2346993	8398221
5326	Regions/clus7	1208	12066	0		390010	15073564	3.18986e+06	2.60838e+06	8783315
5328	Regions/clus7	1368	12066	0		496037	15002535	3.50797e+06	2329887	8.1583e+06
5366	Regions/clus7	4408	12066	0		1.50772e+06	26763566	3.31249e+06	4.05177e+06	7802732
5368	Regions/clus7	4568	12066	0		967389	20628538	3.05046e+06	3.76564e+06	6.85999e+06
5370	Regions/clus7	4728	12066	0		619990	16939312	2405785	2816578	5321709
5371	Regions/clus7	4808	12066	0		855495	20740634	3.13589e+06	3799948	7.13777e+06
5372	Regions/clus7	4888	12066	0		904956	18480306	2.67367e+06	3309933	5685835
5407	Regions/clus7	7688	12066	0		312521	17353452	2.86623e+06	2.72765e+06	8426266
5408	Regions/clus7	7768	12066	0		265294	15441512	2971124	3010179	8.27027e+06
5411	Regions/clus7	8008	12066	0		355260	17604202	3.28358e+06	2.95203e+06	9010890
5412	Regions/clus7	8088	12066	0		364264	17886548	3.1967e+06	2.96824e+06	8711210
5413	Regions/clus7	8168	12066	0		275951	18987388	3.12726e+06	3.32845e+06	9783503
5414	Regions/clus7	8248	12066	0		373490	18431314	3.12093e+06	3148734	9097119
5416	Regions/clus7	8408	12066	0		403977	19232958	3.29622e+06	3.45211e+06	9191923
5417	Regions/clus7	8488	12066	0		219732	23796226	2.9865e+06	3.10445e+06	9644192
5418	Regions/clus7	8568	12066	0		287296	21779984	2.72731e+06	2.92881e+06	9646040
5419	Regions/clus7	8648	12066	0		378678	22932634	2.97497e+06	2677040	8945689
5420	Regions/clus7	8728	12066	0		346223	16473338	2413433	2.54583e+06	7117819
5421	Regions/clus7	8808	12066	0		279067	16081477	2154926	2.48648e+06	6394009
5422	Regions/clus7	8888	12066	0		209688	16545626	1.95798e+06	2167025	5978923
5423	Regions/clus7	8968	12066	0		196643	12987457	1.30686e+06	1.35638e+06	4403811
5427	Regions/clus7	9288	12066	0		2654.32	8.18934e+06	1534838	1326222	4.53078e+06
5428	Regions/clus7	9368	12066	0		2654.32	4.09852e+06	570942	661058	1.97466e+06
5438	Regions/clus7	968	11986	0		382328	22781614	4.31268e+06	3.50186e+06	13528993
5439	Regions/clus7	1048	11986	0		622550	21202868	4105180	3251145	12283421
5440	Regions/clus7	1128	11986	0		469438	16965106	3.36041e+06	2548574	8929183
5441	Regions/clus7	1208	11986	0		426346	17356598	3745983	2.68321e+06	9229453
5442	Regions/clus7	1288	11986	0		432402	14538075	3.2859e+06	2.63162e+06	8391429
5443	Regions/clus7	1368	11986	0		504276	15016973	3.45517e+06	2802152	9194847
5444	Regions/clus7	1448	11986	0		574466	14242535	3626034	2.82563e+06	8753380
5446	Regions/clus7	1608	11986	0		704971	18575766	3.67354e+06	3.03673e+06	8791486
5481	Regions/clus7	4408	11986	0		1.13904e+06	24138202	3.30251e+06	4.06739e+06	7.47189e+06
5483	Regions/clus7	4568	11986	0		1.0071e+06	22422996	3.3362e+06	3683305	6.44516e+06
5484	Regions/clus7	4648	11986	0		817586	17211916	2408975	2.89133e+06	4895005
5485	Regions/clus7	4728	11986	0		1.04594e+06	17136102	2589675	2.83349e+06	5144784
5486	Regions/clus7	4808	11986	0		1.24612e+06	23389918	3.26545e+06	3.80408e+06	7526487
5487	Regions/clus7	4888	11986	0		938899	19013450	2.84878e+06	3.56389e+06	6.88888e+06
5488	Regions/clus7	4968	11986	0		786922	15565525	2.72751e+06	3.05526e+06	5.58987e+06
5489	Regions/clus7	5048	11986	0		578633	14985960	2.55111e+06	2.86135e+06	5.05592e+06
5516	Regions/clus7	7208	11986	0		546564	12181256	2277248	2.308e+06	5.14016e+06
5521	Regions/clus7	7608	11986	0		346279	16873194	3.00437e+06	3226335	8629453
5522	Regions/clus7	7688	11986	0		316239	15949814	2.64808e+06	2.67363e+06	8101568
5523	Regions/clus7	7768	11986	0		465564	20075346	3.31992e+06	3.09317e+06	10488843
5525	Regions/clus7	7928	11986	0		235414	17167316	2.833e+06	2.87707e+06	8805836
5526	Regions/clus7	8008	11986	0		329166	17894992	2.98254e+06	2.95077e+06	8861114
5527	Regions/clus7	8088	11986	0		235481	16278292	2975600	2.85235e+06	9005912
5528	Regions/clus7	8168	11986	0		215014	17890998	2.99691e+06	2.93479e+06	8943197
5530	Regions/clus7	8328	11986	0		285112	18805982	3.08625e+06	3087370	8952088
5531	Regions/clus7	8408	11986	0		371860	20825590	2762221	3.02954e+06	9013837
5532	Regions/clus7	8488	11986	0		397156	24432058	3.15662e+06	3.53064e+06	10784676
5533	Regions/clus7	8568	11986	0		349371	22954202	3182452	3.28861e+06	9864548
5534	Regions/clus7	8648	11986	0		302245	23212100	3.06148e+06	3.02566e+06	9987384
5535	Regions/clus7	8728	11986	0		228938	19186388	2.27716e+06	2.57935e+06	7.41223e+06
5536	Regions/clus7	8808	11986	0		256225	16845598	2.00906e+06	2.20912e+06	7.07344e+06
5537	Regions/clus7	8888	11986	0		191173	15215182	1.58493e+06	2.04467e+06	5836887
5538	Regions/clus7	8968	11986	0		119645	10352354	1.13004e+06	1.21313e+06	3.60296e+06
5541	Regions/clus7	9208	11986	0		122013	8352412	836690	848160	3.0562e+06
5542	Regions/clus7	9288	11986	0		35744.7	1.85121e+06	275208	220582	895198
5543	Regions/clus7	9368	11986	0		2654.32	2889139	597814	528215	1.97037e+06
5544	Regions/clus7	9448	11986	0		2654.32	2909245	559550	569904	1813327
5554	Regions/clus7	1048	11906	0		415293	19442722	4.05393e+06	3.49111e+06	11724151
5555	Regions/clus7	1128	11906	0		330154	13557450	3.14306e+06	2.46917e+06	8120064
5556	Regions/clus7	1208	11906	0		491484	13957591	2841158	2.35374e+06	7.66272e+06
5557	Regions/clus7	1288	11906	0		461622	13573762	3.28813e+06	2.71301e+06	7975346
5558	Regions/clus7	1368	11906	0		354442	14750824	3.26692e+06	2.64706e+06	8697510
5559	Regions/clus7	1448	11906	0		526611	15870697	3.49354e+06	2.68996e+06	8136951
5560	Regions/clus7	1528	11906	0		510956	16099974	3.58743e+06	2.73698e+06	9458375
5561	Regions/clus7	1608	11906	0		687467	19126918	4.28323e+06	3099773	10921438
5563	Regions/clus7	1768	11906	0		938157	18763342	4.00178e+06	2.9023e+06	10154676
5564	Regions/clus7	1848	11906	0		890607	17653402	3660254	3177224	9076800
5565	Regions/clus7	1928	11906	0		1.1653e+06	18922852	3.8874e+06	2.91642e+06	8861160
5597	Regions/clus7	4488	11906	0		794459	19733350	3247619	3452959	5.87886e+06
5598	Regions/clus7	4568	11906	0		1.04017e+06	21922356	2.77228e+06	3.41292e+06	6.21192e+06
5599	Regions/clus7	4648	11906	0		819930	13713339	1.86956e+06	2.55831e+06	3.93486e+06
5600	Regions/clus7	4728	11906	0		873432	15935111	2167286	2.90543e+06	4308320
5601	Regions/clus7	4808	11906	0		1.21505e+06	23063550	3.19547e+06	3.73231e+06	7.31948e+06
5602	Regions/clus7	4888	11906	0		1.38958e+06	24358394	3300510	3.86183e+06	7271656
5603	Regions/clus7	4968	11906	0		1.07708e+06	20677930	2.87894e+06	3.85145e+06	6063895
5604	Regions/clus7	5048	11906	0		863688	17509154	2.26317e+06	3.41915e+06	5506565
5628	Regions/clus7	6968	11906	0		1.16398e+06	15507457	2635792	2.44543e+06	5445914
5631	Regions/clus7	7208	11906	0		579398	13335284	2.44548e+06	2.22796e+06	4.84661e+06
5633	Regions/clus7	7368	11906	0		347349	14387432	2748451	2.81914e+06	6609928
5634	Regions/clus7	7448	11906	0		384443	13173228	2.55342e+06	2.29919e+06	6593614
5635	Regions/clus7	7528	11906	0		243088	14873024	2.33267e+06	2633706	6579465
5636	Regions/clus7	7608	11906	0		304741	15706083	2.68723e+06	2.99549e+06	8082758
5637	Regions/clus7	7688	11906	0		402256	16474632	2.51765e+06	2.57135e+06	7093682
5638	Regions/clus7	7768	11906	0		286746	17768620	2.89251e+06	3041303	9351326
5639	Regions/clus7	7848	11906	0		343029	18529008	3.27222e+06	3.20951e+06	9857823
5640	Regions/clus7	7928	11906	0		339184	18644084	3362931	3294058	10535239
5641	Regions/clus7	8008	11906	0		286121	18109712	3.31301e+06	3.51879e+06	9940267
5642	Regions/clus7	8088	11906	0		214534	17921068	3.01385e+06	3011852	8206841
5643	Regions/clus7	8168	11906	0		191114	18505854	2.87991e+06	2.84509e+06	9306773
5646	Regions/clus7	8408	11906	0		224532	17866158	2.67553e+06	2.91683e+06	8.18681e+06
5647	Regions/clus7	8488	11906	0		323744	23809662	3.27824e+06	2.7768e+06	10540769
5648	Regions/clus7	8568	11906	0		415807	24256646	3.23556e+06	3290427	9787770
5649	Regions/clus7	8648	11906	0		334451	22461594	2.41225e+06	3.09243e+06	8688115
5650	Regions/clus7	8728	11906	0		240994	20173176	2228874	2.21047e+06	7478345
5651	Regions/clus7	8808	11906	0		288269	17092818	1.84876e+06	2.09701e+06	5.66584e+06
5652	Regions/clus7	8888	11906	0		344413	18096722	1.62934e+06	1.51439e+06	5656796
5653	Regions/clus7	8968	11906	0		184231	10275730	891674	893151	3.23683e+06
5656	Regions/clus7	9208	11906	0		42984.6	2.29833e+06	335608	356520	989698
5657	Regions/clus7	9288	11906	0		80512.1	5608769	1.08856e+06	1.02162e+06	3.34376e+06
5658	Regions/clus7	9368	11906	0		2654.32	516924	52058.1	56282.7	194967
5659	Regions/clus7	9448	11906	0		26308.7	1.08381e+06	192377	178389	582679
5667	Regions/clus7	968	11826	0		448446	19189634	3775082	3293983	11961998
5668	Regions/clus7	1048	11826	0		462880	20265744	3462855	3.16757e+06	11304207
5669	Regions/clus7	1128	11826	0		321788	14763788	3.24106e+06	2.70997e+06	9287990
5670	Regions/clus7	1208	11826	0		412210	14872675	3.13473e+06	2.82573e+06	8612464
5671	Regions/clus7	1288	11826	0		360839	17514878	3.53424e+06	2.84961e+06	8769550
5673	Regions/clus7	1448	11826	0		453542	16153609	3.31427e+06	2.835e+06	9344676
5674	Regions/clus7	1528	11826	0		487636	16979094	3.70842e+06	2792358	9490292
5675	Regions/clus7	1608	11826	0		536562	17606924	4426463	3.20427e+06	10898432
5676	Regions/clus7	1688	11826	0		796535	18529002	4433955	3.46571e+06	10215381
5677	Regions/clus7	1768	11826	0		729486	18578914	3.58797e+06	3.0546e+06	10278610
5678	Regions/clus7	1848	11826	0		883932	20570860	4.28765e+06	3.36299e+06	10246909
5679	Regions/clus7	1928	11826	0		1.00731e+06	19934680	3510746	3374331	9352607
5710	Regions/clus7	4408	11826	0		965602	20194528	3.52287e+06	3427203	6.72156e+06
5711	Regions/clus7	4488	11826	0		479354	11924520	1.65293e+06	1.49785e+06	3.60813e+06
5712	Regions/clus7	4568	11826	0		589792	14612942	2.2051e+06	1.7688e+06	4.1547e+06
5713	Regions/clus7	4648	11826	0		624195	13552846	2.15672e+06	2.27538e+06	4099522
5714	Regions/clus7	4728	11826	0		560299	13107782	1738695	2.3809e+06	3.64421e+06
5715	Regions/clus7	4808	11826	0		844072	18569910	2718224	3.70296e+06	5.45658e+06
5716	Regions/clus7	4888	11826	0		1433101	23894180	3.58908e+06	3.97088e+06	6.59861e+06
5717	Regions/clus7	4968	11826	0		1.34085e+06	23682436	3276243	4005656	7133809
5744	Regions/clus7	7128	11826	0		738577	12981494	2.43181e+06	2.15943e+06	5.72991e+06
5745	Regions/clus7	7208	11826	0		709746	13835518	2.64294e+06	2555867	6.4743e+06
5746	Regions/clus7	7288	11826	0		464033	14437519	2.42479e+06	2.53231e+06	6494820
5747	Regions/clus7	7368	11826	0		610284	16991218	3.0318e+06	2.96235e+06	8.38458e+06
5750	Regions/clus7	7608	11826	0		345625	16828606	3.11791e+06	3.05146e+06	8.05283e+06
5751	Regions/clus7	7688	11826	0		318692	16816344	3.0972e+06	2.74144e+06	8190407
5752	Regions/clus7	7768	11826	0		322406	15782086	2.68605e+06	2.82737e+06	7226625
5753	Regions/clus7	7848	11826	0		293680	13444050	1.91187e+06	2.03882e+06	6.47798e+06
5754	Regions/clus7	7928	11826	0		244086	15234688	2.77674e+06	2.78859e+06	7.70053e+06
5755	Regions/clus7	8008	11826	0		279760	17057912	3.05763e+06	2.85477e+06	9052391
5756	Regions/clus7	8088	11826	0		187897	16626174	2.85366e+06	3216124	8364864
5759	Regions/clus7	8328	11826	0		406032	23854076	3.42991e+06	3.1625e+06	10070570
5760	Regions/clus7	8408	11826	0		173960	18293658	2.4758e+06	2.40626e+06	7.93193e+06
5761	Regions/clus7	8488	11826	0		208382	19469274	2.54925e+06	2584050	7884854
5762	Regions/clus7	8568	11826	0		283427	20007638	2.59752e+06	2635564	8439869
5763	Regions/clus7	8648	11826	0		285337	21179830	2.06827e+06	2381536	7676196
5764	Regions/clus7	8728	11826	0		155226	16418887	1.76557e+06	2.15358e+06	5976437
5768	Regions/clus7	9048	11826	0		110252	5.53796e+06	444104	317033	1.37884e+06
5771	Regions/clus7	9288	11826	0		2654.32	1.04348e+06	146983	142471	509390
5772	Regions/clus7	9368	11826	0		2654.32	1.17567e+06	194423	176362	673171
5773	Regions/clus7	9448	11826	0		2654.32	502827	101654	105897	325663
5780	Regions/clus7	968	11746	0		399545	19618498	3.45774e+06	3.11395e+06	11028948
5782	Regions/clus7	1128	11746	0		428705	15811629	3.59259e+06	2948311	10039144
5786	Regions/clus7	1448	11746	0		474262	16753894	3.29646e+06	2.98474e+06	9032963
5787	Regions/clus7	1528	11746	0		570897	17668508	3.64437e+06	2.64718e+06	9108336
5788	Regions/clus7	1608	11746	0		716138	20944104	4.14798e+06	3.16296e+06	10850133
5789	Regions/clus7	1688	11746	0		674314	18934760	3506376	3.26257e+06	10180867
5790	Regions/clus7	1768	11746	0		675353	19560390	4.70722e+06	3.36035e+06	10780736
5791	Regions/clus7	1848	11746	0		888354	22794554	4.22928e+06	3.30344e+06	11980035
5792	Regions/clus7	1928	11746	0		1.04822e+06	23400888	4.49749e+06	3.4258e+06	10077503
5793	Regions/clus7	2008	11746	0		1.03745e+06	21106050	3.95815e+06	2.99346e+06	9185453
5794	Regions/clus7	2088	11746	0		647887	18143524	3.71584e+06	2.95563e+06	8466969
5822	Regions/clus7	4328	11746	0		1.34775e+06	28092660	4210203	4638441	7778134
5823	Regions/clus7	4408	11746	0		966907	20700558	3.34356e+06	3.85857e+06	6.38933e+06
5824	Regions/clus7	4488	11746	0		755213	16244973	2.88175e+06	2628363	4.78401e+06
5825	Regions/clus7	4568	11746	0		832560	17189672	2823489	2.93829e+06	5997519
5826	Regions/clus7	4648	11746	0		988188	16856938	2.36334e+06	2.98169e+06	5.28352e+06
5827	Regions/clus7	4728	11746	0		1.18757e+06	20101046	2.78093e+06	3545090	5.51562e+06
5828	Regions/clus7	4808	11746	0		1.26972e+06	20367494	3289516	3427647	6169675
5829	Regions/clus7	4888	11746	0		1.06247e+06	18056852	2.87844e+06	3.62058e+06	6237479
5830	Regions/clus7	4968	11746	0		1.1029e+06	18583790	2.9826e+06	3.20611e+06	5.20025e+06
5831	Regions/clus7	5048	11746	0		1.16976e+06	21017898	3.45808e+06	3.94616e+06	5.95667e+06
5855	Regions/clus7	6968	11746	0		1.07072e+06	14818739	2.7508e+06	2.60111e+06	6.85519e+06
5856	Regions/clus7	7048	11746	0		981803	13383121	2.69078e+06	2.05153e+06	5.61997e+06
5857	Regions/clus7	7128	11746	0		771291	13189586	2.36905e+06	2276478	6538494
5858	Regions/clus7	7208	11746	0		730355	15052083	2.79479e+06	2852864	6822488
5859	Regions/clus7	7288	11746	0		712860	15937598	2.86077e+06	2850181	7.45287e+06
5860	Regions/clus7	7368	11746	0		574353	16385922	2.59428e+06	2915592	7.56426e+06
5861	Regions/clus7	7448	11746	0		436413	15077688	2.55686e+06	2.57638e+06	6.60455e+06
5862	Regions/clus7	7528	11746	0		404231	18832138	3445778	3175328	9203582
5863	Regions/clus7	7608	11746	0		457461	17062902	2.87291e+06	2761145	8866825
5864	Regions/clus7	7688	11746	0		309213	16316568	2.836e+06	2.91786e+06	8408860
5865	Regions/clus7	7768	11746	0		334173	14859609	2.07076e+06	2.32907e+06	6834777
5866	Regions/clus7	7848	11746	0		302052	13300668	2080463	2.16275e+06	6.70673e+06
5867	Regions/clus7	7928	11746	0		302618	18208188	2.95474e+06	2867671	8943263
5868	Regions/clus7	8008	11746	0		297713	17884288	2.74616e+06	2672679	9338213
5871	Regions/clus7	8248	11746	0		388303	25649098	3.51714e+06	3.44046e+06	11239156
5872	Regions/clus7	8328	11746	0		325093	26454758	3264260	3.38322e+06	10163544
5873	Regions/clus7	8408	11746	0		370504	17070792	2.25255e+06	2259866	7483491
5874	Regions/clus7	8488	11746	0		217979	20736906	2.25451e+06	3.07897e+06	8029786
5875	Regions/clus7	8568	11746	0		196230	16459420	2.52076e+06	2.42066e+06	6.94534e+06
5876	Regions/clus7	8648	11746	0		255222	18001702	2.53417e+06	2.54876e+06	7272390
5877	Regions/clus7	8728	11746	0		231192	12924626	1.50486e+06	1.65499e+06	5.21768e+06
5878	Regions/clus7	8808	11746	0		276003	13806199	1510626	1.84122e+06	5.28007e+06
5881	Regions/clus7	9048	11746	0		70633.4	5.00197e+06	571758	482263	1.97013e+06
5882	Regions/clus7	9128	11746	0		2654.32	1.77793e+06	245824	229468	866762
5883	Regions/clus7	9208	11746	0		2654.32	489862	80113.4	62072	211478
5884	Regions/clus7	9288	11746	0		2654.32	2.55421e+06	509153	452442	1.5118e+06
5885	Regions/clus7	9368	11746	0		2654.32	847122	172256	140207	446538
5888	Regions/clus7	648	11666	0		2654.32	10471669	1.51035e+06	1.85738e+06	6.27033e+06
5893	Regions/clus7	1048	11666	0		360492	19157306	3.54125e+06	2.97156e+06	11147635
5900	Regions/clus7	1608	11666	0		671472	21708886	3.98235e+06	3.3481e+06	11318258
5902	Regions/clus7	1768	11666	0		915995	23000084	4.36063e+06	3.05233e+06	11203005
5903	Regions/clus7	1848	11666	0		840598	23031172	4416321	3.37308e+06	10845921
5904	Regions/clus7	1928	11666	0		1.03768e+06	24271190	4.55326e+06	3244268	11166723
5905	Regions/clus7	2008	11666	0		927630	22096536	3.99966e+06	3.11778e+06	9666478
5906	Regions/clus7	2088	11666	0		1.01505e+06	22881174	4.08958e+06	3.24745e+06	9205024
5931	Regions/clus7	4088	11666	0		1.51586e+06	27967950	4523056	4.46654e+06	7.38024e+06
5933	Regions/clus7	4248	11666	0		1.41069e+06	27658014	4344680	4607258	7.69727e+06
5934	Regions/clus7	4328	11666	0		1.59358e+06	29079648	4507925	4801819	7.46266e+06
5935	Regions/clus7	4408	11666	0		1.45049e+06	24014796	3.7579e+06	3.90311e+06	6.71351e+06
5936	Regions/clus7	4488	11666	0		1.30018e+06	23293962	3649723	4.0749e+06	6.72792e+06
5937	Regions/clus7	4568	11666	0		1.21842e+06	19343374	3.47235e+06	3.69845e+06	5.57205e+06
5938	Regions/clus7	4648	11666	0		754188	17838210	2.49633e+06	3.47806e+06	5315598
5939	Regions/clus7	4728	11666	0		596456	14749312	1.89862e+06	2.60781e+06	3.71286e+06
5940	Regions/clus7	4808	11666	0		1.27259e+06	19658884	3.75517e+06	3.26821e+06	5721518
5941	Regions/clus7	4888	11666	0		1.12158e+06	20590912	3.3493e+06	3.58272e+06	6.09574e+06
5966	Regions/clus7	6888	11666	0		1.52069e+06	21522888	3235688	3.42255e+06	8573053
5969	Regions/clus7	7128	11666	0		821768	14359926	2.37648e+06	2.61218e+06	5878493
5970	Regions/clus7	7208	11666	0		515793	15718115	2.68911e+06	2629852	7.35941e+06
5971	Regions/clus7	7288	11666	0		814231	19433680	3073783	3.33151e+06	8900703
5972	Regions/clus7	7368	11666	0		744498	19627498	3.13543e+06	3234153	9812748
5973	Regions/clus7	7448	11666	0		502542	15944853	2.74383e+06	2.88246e+06	7.60258e+06
5974	Regions/clus7	7528	11666	0		311465	14953207	2.98823e+06	2587281	8.09469e+06
5975	Regions/clus7	7608	11666	0		378257	18709540	3.20769e+06	2.97915e+06	9569357
5976	Regions/clus7	7688	11666	0		294735	16998062	2.76952e+06	3073267	7999812
5977	Regions/clus7	7768	11666	0		283028	14502889	2148689	1.99294e+06	7.14777e+06
5978	Regions/clus7	7848	11666	0		320348	15703789	2.61471e+06	2711524	9078714
5979	Regions/clus7	7928	11666	0		445019	19171902	3.03173e+06	2.90786e+06	8994566
5980	Regions/clus7	8008	11666	0		264767	17584124	2.64584e+06	2.61041e+06	8.32272e+06
5982	Regions/clus7	8168	11666	0		303002	21049912	3.08041e+06	3275732	9700774
5983	Regions/clus7	8248	11666	0		307223	25921686	3.28859e+06	3.16768e+06	10855791
5984	Regions/clus7	8328	11666	0		280504	21695504	2.44374e+06	3.20383e+06	9035518
5985	Regions/clus7	8408	11666	0		250321	18749462	2722004	2.54498e+06	7.87932e+06
5986	Regions/clus7	8488	11666	0		175426	20413932	2.66184e+06	2.60779e+06	8360528
5988	Regions/clus7	8648	11666	0		209168	17220278	2.53801e+06	2.41028e+06	7300934
5991	Regions/clus7	8888	11666	0		123822	10807233	1196584	965759	3.72264e+06
5992	Regions/clus7	8968	11666	0		54677.5	5592373	597969	464517	1.6971e+06
5993	Regions/clus7	9048	11666	0		48247.1	2.91822e+06	400458	372876	1.39021e+06
5994	Regions/clus7	9128	11666	0		26799.4	829132	130618	113457	444301
5995	Regions/clus7	9208	11666	0		2654.32	1.35295e+06	180583	199712	709648
5996	Regions/clus7	9288	11666	0		2654.32	513898	108200	109245	352224
5997	Regions/clus7	9368	11666	0		2654.32	381105	84598	70366	214034
6003	Regions/clus7	968	11586	0		406371	24372290	3.9156e+06	3.3208e+06	12319819
6005	Regions/clus7	1128	11586	0		443126	20023530	3.17481e+06	3.52206e+06	10114789
6013	Regions/clus7	1768	11586	0		988762	29365742	5.14482e+06	3.8825e+06	13671904
6015	Regions/clus7	1928	11586	0		716232	25269936	4290117	3.60959e+06	11648626
6016	Regions/clus7	2008	11586	0		902515	24950544	4285553	3250098	10820214
6017	Regions/clus7	2088	11586	0		1.03788e+06	21261526	3.9775e+06	3054234	9753112
6018	Regions/clus7	2168	11586	0		851904	20184092	3.97864e+06	2894350	8729279
6019	Regions/clus7	2248	11586	0		1.11792e+06	19856874	4.13931e+06	2.96552e+06	8525500
6020	Regions/clus7	2328	11586	0		1.07398e+06	19770368	3.34155e+06	2.70496e+06	7094899
6021	Regions/clus7	2408	11586	0		986856	17429302	3485576	2353833	6.80972e+06
6022	Regions/clus7	2488	11586	0		921332	16438727	3.04451e+06	2440670	6.44351e+06
6042	Regions/clus7	4088	11586	0		1.62896e+06	27077282	4.06564e+06	4370494	7766795
6043	Regions/clus7	4168	11586	0		1.21932e+06	26997248	4.30436e+06	4.31724e+06	7.54357e+06
6044	Regions/clus7	4248	11586	0		1.49614e+06	32016714	4842004	4826089	8596782
6045	Regions/clus7	4328	11586	0		1.47456e+06	29868568	4766050	4727097	8.34489e+06
6046	Regions/clus7	4408	11586	0		1.18141e+06	25181436	4.03506e+06	4.42217e+06	7423896
6047	Regions/clus7	4488	11586	0		1.01931e+06	18765334	3.34711e+06	3.63479e+06	5504458
6048	Regions/clus7	4568	11586	0		883858	15351175	2.45347e+06	3.22087e+06	5045332
6049	Regions/clus7	4648	11586	0		908332	15967503	2527746	3.54144e+06	5310221
6050	Regions/clus7	4728	11586	0		958809	18145452	2.893e+06	3.32643e+06	5286444
6051	Regions/clus7	4808	11586	0		913407	18665204	3.52594e+06	3937595	5865345
6052	Regions/clus7	4888	11586	0		1.23111e+06	21891740	3.23516e+06	3.86736e+06	6526839
6054	Regions/clus7	5048	11586	0		1.25422e+06	19357470	3.18304e+06	3702141	5448318
6055	Regions/clus7	5128	11586	0		1.05096e+06	18629700	3.12243e+06	3946532	5471185
6075	Regions/clus7	6728	11586	0		2.08421e+06	24693678	3.96159e+06	3.43675e+06	8.26594e+06
6077	Regions/clus7	6888	11586	0		1390393	24939182	3.64889e+06	3.36939e+06	8551093
6078	Regions/clus7	6968	11586	0		990901	17628784	3325589	2.8961e+06	7419192
6079	Regions/clus7	7048	11586	0		682089	16827502	3.11619e+06	3.02219e+06	7400617
6080	Regions/clus7	7128	11586	0		973284	19388876	3.41088e+06	3058758	8542637
6081	Regions/clus7	7208	11586	0		897472	19987106	3.13414e+06	3.10949e+06	9618232
6082	Regions/clus7	7288	11586	0		836993	18758320	3.11378e+06	3.20315e+06	9076224
6083	Regions/clus7	7368	11586	0		450232	18976040	3262449	3.07136e+06	9034807
6084	Regions/clus7	7448	11586	0		278852	16631317	3.10786e+06	3.08074e+06	8562334
6085	Regions/clus7	7528	11586	0		357781	16301957	2.64554e+06	2.72173e+06	8431214
6086	Regions/clus7	7608	11586	0		223387	16568199	2.47084e+06	2.81187e+06	7556988
6087	Regions/clus7	7688	11586	0		315201	16470035	3.07723e+06	2.91573e+06	8948646
6088	Regions/clus7	7768	11586	0		313284	17756918	2.83275e+06	2643653	8.2922e+06
6089	Regions/clus7	7848	11586	0		388375	14092927	2.29229e+06	2.269e+06	6.95132e+06
6092	Regions/clus7	8088	11586	0		282853	19905682	2471754	2720808	8451640
6093	Regions/clus7	8168	11586	0		386828	22145352	2.62754e+06	2.86708e+06	9242600
6094	Regions/clus7	8248	11586	0		367590	20603788	2.85663e+06	3.14026e+06	8356228
6095	Regions/clus7	8328	11586	0		216381	17738700	2.68182e+06	2683264	7735203
6097	Regions/clus7	8488	11586	0		217009	22543484	2.66516e+06	3.07297e+06	8828987
6099	Regions/clus7	8648	11586	0		297118	17727804	2.00309e+06	2224526	6424054
6105	Regions/clus7	9128	11586	0		2654.32	4108684	720569	798095	2.4507e+06
6106	Regions/clus7	9208	11586	0		2654.32	877475	132754	136769	421730
6118	Regions/clus7	1448	11506	0		409528	19316440	3.87846e+06	2.94082e+06	10150703
6122	Regions/clus7	1768	11506	0		1.00538e+06	26226362	4.32428e+06	3.38923e+06	11068156
6125	Regions/clus7	2008	11506	0		827690	22119158	3.92026e+06	3.29817e+06	10618929
6126	Regions/clus7	2088	11506	0		1.07754e+06	24771488	4.85739e+06	3.15177e+06	11144235
6127	Regions/clus7	2168	11506	0		775792	20107044	3608049	3.03793e+06	8816126
6128	Regions/clus7	2248	11506	0		1.07516e+06	22032976	3.88711e+06	3.09894e+06	8997191
6129	Regions/clus7	2328	11506	0		892064	19721410	3.94828e+06	2.61802e+06	8.32689e+06
6130	Regions/clus7	2408	11506	0		802561	15743960	3286120	2.34826e+06	6.78202e+06
6131	Regions/clus7	2488	11506	0		808414	14011311	2.84567e+06	2.19072e+06	6196352
6132	Regions/clus7	2568	11506	0		992639	19862490	3322360	2.50111e+06	7.33115e+06
6133	Regions/clus7	2648	11506	0		1.01331e+06	19812518	2725721	2571457	6.7013e+06
6134	Regions/clus7	2728	11506	0		1.06109e+06	19295142	2.49959e+06	2.08721e+06	5741081
6152	Regions/clus7	4168	11506	0		1.17254e+06	23551572	4.26071e+06	4.13079e+06	6.53137e+06
6153	Regions/clus7	4248	11506	0		1408125	34420856	5.53587e+06	5694415	9175492
6154	Regions/clus7	4328	11506	0		1.32565e+06	27296752	3.86813e+06	5.02298e+06	7.5208e+06
6155	Regions/clus7	4408	11506	0		1.07393e+06	24075442	3.45205e+06	3.76017e+06	6052942
6156	Regions/clus7	4488	11506	0		1.19585e+06	21543172	3.71574e+06	3.98944e+06	5850815
6157	Regions/clus7	4568	11506	0		953220	19037356	3349149	3.27929e+06	5.4513e+06
6158	Regions/clus7	4648	11506	0		803084	14590185	2703508	2.77237e+06	4.16846e+06
6159	Regions/clus7	4728	11506	0		837023	18059824	3.08115e+06	3.63509e+06	5.34272e+06
6160	Regions/clus7	4808	11506	0		1.17419e+06	19954172	3.35554e+06	3.30227e+06	5483155
6161	Regions/clus7	4888	11506	0		1.0989e+06	21619168	3297005	4190593	6713466
6183	Regions/clus7	6648	11506	0		1.50927e+06	22935296	3461929	3159315	8477509
6185	Regions/clus7	6808	11506	0		1.24859e+06	24847878	3.63982e+06	3.44669e+06	9529666
6186	Regions/clus7	6888	11506	0		1.11173e+06	22102332	4288348	3.53317e+06	8888957
6187	Regions/clus7	6968	11506	0		846824	18834594	3.45497e+06	3036480	7.62558e+06
6188	Regions/clus7	7048	11506	0		788608	17504904	3.20016e+06	3.02505e+06	6959723
6189	Regions/clus7	7128	11506	0		632889	18043910	2.84048e+06	2.78929e+06	7941323
6190	Regions/clus7	7208	11506	0		608923	20141898	3.31242e+06	3.48825e+06	9213075
6191	Regions/clus7	7288	11506	0		567317	20749130	3.69025e+06	3.38593e+06	10656279
6192	Regions/clus7	7368	11506	0		624191	20589446	3517515	3.59804e+06	10050636
6193	Regions/clus7	7448	11506	0		496143	20672026	3.90243e+06	3586271	10889073
6194	Regions/clus7	7528	11506	0		469459	18888132	3054236	3.19605e+06	10039089
6195	Regions/clus7	7608	11506	0		413285	19788648	2.89918e+06	3118760	8840478
6196	Regions/clus7	7688	11506	0		245388	18076670	2.56691e+06	3.17673e+06	8659208
6197	Regions/clus7	7768	11506	0		389236	17533496	2.90064e+06	2.7277e+06	8.37378e+06
6198	Regions/clus7	7848	11506	0		248527	18278482	3174183	2.88509e+06	8.15242e+06
6200	Regions/clus7	8008	11506	0		372956	20824234	2663546	2.78811e+06	8752806
6201	Regions/clus7	8088	11506	0		262240	21392570	3018127	3.01839e+06	9605063
6202	Regions/clus7	8168	11506	0		219824	17266050	2.61404e+06	2.65753e+06	7790083
6204	Regions/clus7	8328	11506	0		217720	18124668	2407120	2.36989e+06	7402956
6206	Regions/clus7	8488	11506	0		238708	20534104	2.44897e+06	2838317	8371274
6210	Regions/clus7	8808	11506	0		160749	12201771	1.37013e+06	1.22902e+06	4663692
6212	Regions/clus7	8968	11506	0		73757.1	5.96954e+06	733415	859029	2.87172e+06
6214	Regions/clus7	9128	11506	0		2654.32	921929	174519	141789	529536
6231	Regions/clus7	2008	11426	0		807358	26158970	4389900	3.32014e+06	11914067
6233	Regions/clus7	2168	11426	0		983124	20227882	4.1992e+06	2928336	9758027
6234	Regions/clus7	2248	11426	0		1.07968e+06	24517348	4.10654e+06	2.96064e+06	9533374
6235	Regions/clus7	2328	11426	0		1.06569e+06	20172136	3.95789e+06	3.16277e+06	8.31595e+06
6236	Regions/clus7	2408	11426	0		907613	19516996	3.50006e+06	2.23095e+06	7.80028e+06
6237	Regions/clus7	2488	11426	0		961856	17168076	3175810	2.66198e+06	7.25972e+06
6238	Regions/clus7	2568	11426	0		1.03569e+06	17114302	2.94088e+06	2486794	5919196
6239	Regions/clus7	2648	11426	0		1.19348e+06	21041626	3.2495e+06	2493798	6.5042e+06
6240	Regions/clus7	2728	11426	0		1.06972e+06	17758262	2.39883e+06	1.96229e+06	5643140
6241	Regions/clus7	2808	11426	0		867608	15153165	2.12622e+06	1.84767e+06	4.52915e+06
6257	Regions/clus7	4088	11426	0		488059	11698198	1.92569e+06	1.7929e+06	3.50048e+06
6258	Regions/clus7	4168	11426	0		875775	18375240	3513488	3.05715e+06	5.62024e+06
6259	Regions/clus7	4248	11426	0		1.06712e+06	22547998	3.96887e+06	4320457	6.84991e+06
6260	Regions/clus7	4328	11426	0		942995	18804130	3110398	3.53912e+06	5.6196e+06
6261	Regions/clus7	4408	11426	0		1.03009e+06	17696710	3.22382e+06	3581622	5735475
6262	Regions/clus7	4488	11426	0		658952	17164238	3.1176e+06	3014376	5443297
6263	Regions/clus7	4568	11426	0		884339	15076772	2.57889e+06	2920325	4761481
6264	Regions/clus7	4648	11426	0		512509	10115198	1.98742e+06	2.22691e+06	3.16846e+06
6265	Regions/clus7	4728	11426	0		443054	10294500	2101895	2.24473e+06	3.71898e+06
6266	Regions/clus7	4808	11426	0		1.04619e+06	17755574	3.76485e+06	3.49739e+06	5527431
6267	Regions/clus7	4888	11426	0		1.16688e+06	19121828	3.53251e+06	3.7003e+06	5584509
6268	Regions/clus7	4968	11426	0		1289481	21245964	3255450	3.7439e+06	6324137
6269	Regions/clus7	5048	11426	0		1.33083e+06	18237164	2.60434e+06	3292787	5613935
6270	Regions/clus7	5128	11426	0		1.13272e+06	20231130	3.13826e+06	3.39148e+06	5.75322e+06
6285	Regions/clus7	6328	11426	0		932606	26509384	3508191	3.82928e+06	9313702
6288	Regions/clus7	6568	11426	0		1.25882e+06	24154644	4.14722e+06	4.00903e+06	9196529
6289	Regions/clus7	6648	11426	0		1.28302e+06	23589014	3732627	3.37945e+06	8877358
6290	Regions/clus7	6728	11426	0		905703	20480196	3.68702e+06	3.60759e+06	9506705
6291	Regions/clus7	6808	11426	0		1.14824e+06	25085020	4.23535e+06	3881968	9907135
6292	Regions/clus7	6888	11426	0		1.0685e+06	26897794	4237791	3.93177e+06	11106064
6293	Regions/clus7	6968	11426	0		1.04288e+06	22298334	3.80228e+06	3.39691e+06	9321039
6294	Regions/clus7	7048	11426	0		826279	21187574	3.34343e+06	3.464e+06	9578078
6295	Regions/clus7	7128	11426	0		566424	17958528	3.23232e+06	3.11068e+06	9966024
6296	Regions/clus7	7208	11426	0		541190	19875708	3.26494e+06	3.06912e+06	9221468
6297	Regions/clus7	7288	11426	0		632024	20717140	2.74058e+06	2.88101e+06	8853110
6298	Regions/clus7	7368	11426	0		508458	25428098	4.02512e+06	3.80281e+06	11336682
6299	Regions/clus7	7448	11426	0		383580	20772790	3.68632e+06	3.27283e+06	9941311
6300	Regions/clus7	7528	11426	0		336146	19390236	3.02456e+06	3.08252e+06	9777143
6301	Regions/clus7	7608	11426	0		453468	20987132	3.17496e+06	3.56758e+06	9279850
6302	Regions/clus7	7688	11426	0		242267	18438830	3.20591e+06	2.80527e+06	9545458
6303	Regions/clus7	7768	11426	0		339733	21606404	3226144	3302147	10531809
6304	Regions/clus7	7848	11426	0		407392	23635702	3.36693e+06	3.03513e+06	10664337
6305	Regions/clus7	7928	11426	0		314003	17694462	2841359	3.01292e+06	8518530
6306	Regions/clus7	8008	11426	0		262574	19792076	3.28323e+06	2.91389e+06	8668964
6307	Regions/clus7	8088	11426	0		304669	17743122	2324442	2.31552e+06	7.30682e+06
6308	Regions/clus7	8168	11426	0		303502	17904924	2.56898e+06	2553819	8.25709e+06
6309	Regions/clus7	8248	11426	0		244834	20039906	2743013	2.7761e+06	8715043
6310	Regions/clus7	8328	11426	0		166327	17686946	2.28415e+06	2.38206e+06	7569647
6315	Regions/clus7	8728	11426	0		128746	13028797	1.40938e+06	1.13264e+06	4.03364e+06
6316	Regions/clus7	8808	11426	0		150722	7940624	1.35615e+06	1356410	4291670
6317	Regions/clus7	8888	11426	0		2654.32	1.00724e+06	89813.1	97731.9	324630
6335	Regions/clus7	2248	11346	0		772991	20327872	3.86845e+06	2.92651e+06	8856032
6336	Regions/clus7	2328	11346	0		1.34685e+06	25592332	3.95348e+06	3176422	9750218
6337	Regions/clus7	2408	11346	0		1.20068e+06	21816070	3.79116e+06	2605113	8642840
6338	Regions/clus7	2488	11346	0		918818	19532266	3.17074e+06	2355731	7.4468e+06
6339	Regions/clus7	2568	11346	0		938791	18318030	3.10233e+06	2.29869e+06	6.63866e+06
6340	Regions/clus7	2648	11346	0		748107	17750090	2.76531e+06	2.42108e+06	6.88751e+06
6341	Regions/clus7	2728	11346	0		679637	14402561	2.53887e+06	1.92477e+06	5273152
6342	Regions/clus7	2808	11346	0		594208	13555753	2.18953e+06	1.84269e+06	5055111
6343	Regions/clus7	2888	11346	0		727998	11228526	2.13596e+06	1.81253e+06	3859989
6344	Regions/clus7	2968	11346	0		557709	8503215	1.46512e+06	1.35641e+06	3.23113e+06
6358	Regions/clus7	4088	11346	0		721260	17510970	3.39589e+06	3307655	5617941
6359	Regions/clus7	4168	11346	0		899260	19566542	3.79002e+06	3327394	5778542
6360	Regions/clus7	4248	11346	0		1.14981e+06	19036628	3.2092e+06	3.36733e+06	5.40371e+06
6361	Regions/clus7	4328	11346	0		1.00578e+06	19219388	3.04933e+06	3.5599e+06	5.78317e+06
6362	Regions/clus7	4408	11346	0		832321	19047588	3.52489e+06	3.83984e+06	5.96824e+06
6363	Regions/clus7	4488	11346	0		711015	14389940	2.90437e+06	3.10966e+06	4.96736e+06
6364	Regions/clus7	4568	11346	0		601731	10973705	2056538	2206446	3.4729e+06
6365	Regions/clus7	4648	11346	0		284791	5704481	1.05123e+06	1.3381e+06	2.00979e+06
6366	Regions/clus7	4728	11346	0		262003	8492622	1.9045e+06	1.91935e+06	2.93513e+06
6367	Regions/clus7	4808	11346	0		946043	19055350	3.424e+06	3455108	5.97604e+06
6368	Regions/clus7	4888	11346	0		1.30859e+06	23432150	3663286	3449576	6.6954e+06
6369	Regions/clus7	4968	11346	0		1345272	22826678	3466116	3972032	6.39573e+06
6370	Regions/clus7	5048	11346	0		942118	19757064	2.82618e+06	3659045	5.58949e+06
6371	Regions/clus7	5128	11346	0		1.64035e+06	28451834	3.65434e+06	4.21024e+06	7188638
6386	Regions/clus7	6328	11346	0		2.88365e+06	55831048	5890626	5.09416e+06	13801154
6389	Regions/clus7	6568	11346	0		1.40581e+06	29996672	4197685	4116964	11072907
6390	Regions/clus7	6648	11346	0		1.28988e+06	27100578	3.9565e+06	3966318	9925805
6391	Regions/clus7	6728	11346	0		1.28242e+06	32004134	4.05328e+06	4.13453e+06	11597853
6392	Regions/clus7	6808	11346	0		783274	28081716	4.1541e+06	4042294	10718950
6393	Regions/clus7	6888	11346	0		812534	27423510	3.88579e+06	3.61022e+06	11598378
6394	Regions/clus7	6968	11346	0		889658	23590156	3400041	3.26184e+06	9375042
6395	Regions/clus7	7048	11346	0		842437	24053286	3.66878e+06	3.93312e+06	9549170
6396	Regions/clus7	7128	11346	0		742230	22133388	3.42673e+06	3.49375e+06	10096183
6397	Regions/clus7	7208	11346	0		620652	23671566	3.67695e+06	3.6601e+06	10481306
6398	Regions/clus7	7288	11346	0		447137	20109566	2.97465e+06	3.22155e+06	8861543
6399	Regions/clus7	7368	11346	0		507577	18887772	3.11799e+06	2.9869e+06	8616236
6400	Regions/clus7	7448	11346	0		314194	21153120	3.41034e+06	3.26173e+06	10343687
6401	Regions/clus7	7528	11346	0		401140	21186838	2983180	3.14161e+06	9740024
6402	Regions/clus7	7608	11346	0		430060	23483354	3.0469e+06	2992964	9761436
6403	Regions/clus7	7688	11346	0		310520	19850490	2.81883e+06	3.07392e+06	9309381
6404	Regions/clus7	7768	11346	0		351661	20504472	2.748e+06	3188386	8837564
6405	Regions/clus7	7848	11346	0		413119	20752334	3.00503e+06	3.11557e+06	9206081
6406	Regions/clus7	7928	11346	0		356922	20877042	2.81581e+06	2.96715e+06	8903649
6407	Regions/clus7	8008	11346	0		380297	22123750	2.74599e+06	3181285	8619646
6411	Regions/clus7	8328	11346	0		346892	17034980	2146410	2128971	6447574
6416	Regions/clus7	8728	11346	0		118102	7960030	1417800	1.38172e+06	4.09366e+06
6417	Regions/clus7	8808	11346	0		2654.32	2.02129e+06	344809	277450	974935
6418	Regions/clus7	8888	11346	0		2654.32	372641	40524.4	41089.6	139076
6435	Regions/clus7	2488	11266	0		853699	18885678	3.36347e+06	2430275	6857763
6437	Regions/clus7	2648	11266	0		786670	14163843	2.35135e+06	1.4684e+06	4.7631e+06
6438	Regions/clus7	2728	11266	0		648529	13728916	2034390	1.37222e+06	4.21348e+06
6439	Regions/clus7	2808	11266	0		593794	11221590	1.70333e+06	1.37679e+06	3.45613e+06
6440	Regions/clus7	2888	11266	0		422711	8927602	1.51845e+06	1.1478e+06	2.83952e+06
6441	Regions/clus7	2968	11266	0		418058	8144205	1.40417e+06	1.06617e+06	2.24571e+06
6442	Regions/clus7	3048	11266	0		402562	8093619	1.40532e+06	866479	2.26663e+06
6444	Regions/clus7	3208	11266	0		521328	9167632	1.24479e+06	664371	2.37657e+06
6454	Regions/clus7	4008	11266	0		1.02976e+06	22479024	3730832	3.56479e+06	6.48879e+06
6455	Regions/clus7	4088	11266	0		902769	18828266	3.27659e+06	3320193	5.14849e+06
6456	Regions/clus7	4168	11266	0		637981	14360091	2.67294e+06	2.98456e+06	4381944
6457	Regions/clus7	4248	11266	0		987492	18493306	3.55945e+06	3.71431e+06	6.22574e+06
6458	Regions/clus7	4328	11266	0		1.11144e+06	18427596	3.49176e+06	4.08595e+06	5.44007e+06
6459	Regions/clus7	4408	11266	0		880472	16336136	2852527	3.16155e+06	4684907
6460	Regions/clus7	4488	11266	0		668878	14175565	2.47636e+06	2.85047e+06	4.08031e+06
6461	Regions/clus7	4568	11266	0		542777	11510976	2.43122e+06	2.46513e+06	4.35593e+06
6463	Regions/clus7	4728	11266	0		491840	10001063	1690834	2137727	3.77512e+06
6464	Regions/clus7	4808	11266	0		880130	17769404	2.99912e+06	3.70378e+06	5.48838e+06
6465	Regions/clus7	4888	11266	0		1.28588e+06	21298564	3071610	3.20597e+06	5.34117e+06
6466	Regions/clus7	4968	11266	0		1.13198e+06	20060874	2.91787e+06	3.12706e+06	5.93518e+06
6467	Regions/clus7	5048	11266	0		1.24005e+06	20335936	2.94205e+06	2.84948e+06	5.83345e+06
6468	Regions/clus7	5128	11266	0		1.24818e+06	23500644	3.23387e+06	3.77461e+06	6568456
6469	Regions/clus7	5208	11266	0		1.39858e+06	23839012	3115984	3103877	6440517
6482	Regions/clus7	6248	11266	0		639258	20746188	2.98586e+06	3.01818e+06	7352606
6483	Regions/clus7	6328	11266	0		1.48277e+06	48793896	5042122	4401519	13391670
6484	Regions/clus7	6408	11266	0		1654934	60997420	5165914	5.09327e+06	14954316
6485	Regions/clus7	6488	11266	0		973556	29545914	4505756	3.98653e+06	10836713
6486	Regions/clus7	6568	11266	0		923726	26774896	4.05087e+06	3.67045e+06	9418462
6487	Regions/clus7	6648	11266	0		970767	21220974	2.93556e+06	3.24797e+06	7684951
6488	Regions/clus7	6728	11266	0		895762	29822506	3.72795e+06	3766941	10329483
6489	Regions/clus7	6808	11266	0		714918	27227974	4.22642e+06	3639870	9941499
6490	Regions/clus7	6888	11266	0		809871	24723190	3.25717e+06	3.33811e+06	9577291
6491	Regions/clus7	6968	11266	0		781714	22933762	3.94939e+06	3858254	10073868
6492	Regions/clus7	7048	11266	0		805447	26655894	3.75232e+06	3.64872e+06	11052941
6493	Regions/clus7	7128	11266	0		567820	25631278	3.51663e+06	3.51695e+06	10029968
6494	Regions/clus7	7208	11266	0		627248	22682048	3417087	3.25257e+06	9682279
6495	Regions/clus7	7288	11266	0		594270	23512816	3.17646e+06	3373268	10430437
6496	Regions/clus7	7368	11266	0		391184	17543010	3.16149e+06	2805753	8139676
6497	Regions/clus7	7448	11266	0		296809	19943682	3.19391e+06	3.28269e+06	9634865
6498	Regions/clus7	7528	11266	0		293948	22864778	2.97464e+06	3245198	9657902
6499	Regions/clus7	7608	11266	0		369818	22156646	2.86488e+06	2.97083e+06	10066055
6500	Regions/clus7	7688	11266	0		205181	21330346	2.71167e+06	2.74223e+06	9038476
6501	Regions/clus7	7768	11266	0		494281	21385292	2730580	2.64822e+06	8236237
6502	Regions/clus7	7848	11266	0		362388	22300524	2.56454e+06	2.73652e+06	8400732
6505	Regions/clus7	8088	11266	0		209679	17853466	2.00839e+06	2.49202e+06	7.08107e+06
6511	Regions/clus7	8568	11266	0		114760	11235430	1.17198e+06	1206551	4.51712e+06
6512	Regions/clus7	8648	11266	0		93179.3	8319066	1.39958e+06	1.5543e+06	4.51989e+06
6513	Regions/clus7	8728	11266	0		2654.32	3625669	607251	609196	2.07741e+06
6532	Regions/clus7	2808	11186	0		577208	9055631	1.36648e+06	965599	2.774e+06
6533	Regions/clus7	2888	11186	0		460284	6678176	1.44011e+06	858910	2.37675e+06
6534	Regions/clus7	2968	11186	0		377467	6.03538e+06	868033	647879	1740862
6535	Regions/clus7	3048	11186	0		269714	6.09688e+06	1.11038e+06	758183	1.96393e+06
6536	Regions/clus7	3128	11186	0		286405	5.54375e+06	912465	448806	1.75507e+06
6537	Regions/clus7	3208	11186	0		165747	3.47921e+06	773036	344343	1.17012e+06
6546	Regions/clus7	3928	11186	0		690557	16314616	3.15578e+06	2693176	5275100
6547	Regions/clus7	4008	11186	0		1.30157e+06	31999576	3479534	2.63337e+06	6.66345e+06
6548	Regions/clus7	4088	11186	0		969411	25252038	3.63678e+06	2292098	6.09753e+06
6549	Regions/clus7	4168	11186	0		371057	10440384	2.00147e+06	1754446	3.40451e+06
6550	Regions/clus7	4248	11186	0		672460	14493963	3353179	2.96858e+06	4856543
6551	Regions/clus7	4328	11186	0		759040	16196696	3.23207e+06	3.45209e+06	5572361
6552	Regions/clus7	4408	11186	0		852326	15192696	2.64852e+06	2.98283e+06	4.70854e+06
6553	Regions/clus7	4488	11186	0		739119	13398033	2.4568e+06	2.46793e+06	4.08056e+06
6554	Regions/clus7	4568	11186	0		620834	13815412	2.50843e+06	2.45798e+06	4329241
6556	Regions/clus7	4728	11186	0		545012	12350642	2.48419e+06	2.66466e+06	4.26979e+06
6557	Regions/clus7	4808	11186	0		951166	18870182	3.02502e+06	3314189	5.27476e+06
6558	Regions/clus7	4888	11186	0		851234	17893498	2.77251e+06	2.83227e+06	5203097
6559	Regions/clus7	4968	11186	0		907946	20073522	2.74402e+06	2699933	4730588
6560	Regions/clus7	5048	11186	0		1.08319e+06	19756742	3092999	2668800	5.50968e+06
6561	Regions/clus7	5128	11186	0		935968	20655592	2.82768e+06	3102193	5647353
6562	Regions/clus7	5208	11186	0		756302	17520324	2.20717e+06	2677077	5.16057e+06
6563	Regions/clus7	5288	11186	0		908013	18349960	2296746	2.41697e+06	5.0911e+06
6564	Regions/clus7	5368	11186	0		883014	16655321	2.02284e+06	1.95976e+06	4.38962e+06
6565	Regions/clus7	5448	11186	0		1.03297e+06	16903588	2.14714e+06	1.75569e+06	3.71325e+06
6566	Regions/clus7	5528	11186	0		786370	14666351	1.78201e+06	1.83888e+06	3.84174e+06
6573	Regions/clus7	6088	11186	0		465690	13397756	1.92011e+06	1.42165e+06	4.25489e+06
6575	Regions/clus7	6248	11186	0		671807	18331802	2.95483e+06	2.54612e+06	6703780
6576	Regions/clus7	6328	11186	0		675596	23541252	2.73662e+06	1.99272e+06	7.238e+06
6578	Regions/clus7	6488	11186	0		701924	22124192	2870818	3165380	8329312
6579	Regions/clus7	6568	11186	0		851563	25826754	3.28274e+06	3.53256e+06	8835690
6580	Regions/clus7	6648	11186	0		561399	16360831	2.87511e+06	2755884	7.41777e+06
6581	Regions/clus7	6728	11186	0		815076	26433942	4200372	3.6409e+06	10623983
6582	Regions/clus7	6808	11186	0		661833	24851504	3.19284e+06	3150541	9467572
6583	Regions/clus7	6888	11186	0		701825	27610030	3821203	3.69029e+06	9855141
6584	Regions/clus7	6968	11186	0		528766	23121066	3078654	3365112	9086037
6585	Regions/clus7	7048	11186	0		438665	22806538	3480378	3.68279e+06	9412050
6586	Regions/clus7	7128	11186	0		493232	22645314	3.55778e+06	3.58073e+06	10319812
6587	Regions/clus7	7208	11186	0		575110	24169742	3.43672e+06	3.42142e+06	9227237
6588	Regions/clus7	7288	11186	0		332266	22611746	3.01304e+06	3109710	9416129
6589	Regions/clus7	7368	11186	0		316537	18390488	2.59589e+06	2.80371e+06	7.81654e+06
6590	Regions/clus7	7448	11186	0		371009	25311808	3190573	3234564	10392657
6591	Regions/clus7	7528	11186	0		348944	19419440	2.86903e+06	2.99513e+06	8.38073e+06
6592	Regions/clus7	7608	11186	0		365090	19842778	2.96689e+06	2.60353e+06	8723022
6593	Regions/clus7	7688	11186	0		412119	23495196	3.02934e+06	2.9366e+06	9147087
6594	Regions/clus7	7768	11186	0		299368	16770350	2192135	2.14616e+06	6.74058e+06
6595	Regions/clus7	7848	11186	0		217387	18959384	2.43843e+06	2.47508e+06	7333308
6596	Regions/clus7	7928	11186	0		371803	21292858	2.64178e+06	2.66016e+06	8.15411e+06
6603	Regions/clus7	8488	11186	0		2654.32	6.17987e+06	1287420	1.12794e+06	3672041
6604	Regions/clus7	8568	11186	0		2654.32	3.24019e+06	574948	500186	1.75845e+06
6605	Regions/clus7	8648	11186	0		2654.32	1.57697e+06	251159	245061	834816
6630	Regions/clus7	3608	11106	0		152968	3727812	698370	452024	1.17464e+06
6631	Regions/clus7	3688	11106	0		397740	9212881	1.71043e+06	1.07405e+06	2.44588e+06
6632	Regions/clus7	3768	11106	0		517527	9442494	1.91629e+06	1.19596e+06	2822657
6633	Regions/clus7	3848	11106	0		684105	13078403	2.43063e+06	1.87423e+06	3.93709e+06
6634	Regions/clus7	3928	11106	0		794981	15281135	2897444	2.07939e+06	4527733
6635	Regions/clus7	4008	11106	0		744357	16738414	2457234	1.78338e+06	4.10732e+06
6636	Regions/clus7	4088	11106	0		558082	14469999	2.37121e+06	1.43887e+06	3.8786e+06
6637	Regions/clus7	4168	11106	0		643390	14732887	1870615	1.14675e+06	3.11044e+06
6638	Regions/clus7	4248	11106	0		597944	13200797	2.75768e+06	2.05739e+06	4.01204e+06
6639	Regions/clus7	4328	11106	0		343549	13289382	2.44113e+06	2.3055e+06	4274390
6640	Regions/clus7	4408	11106	0		580023	14592683	2.30313e+06	2.38033e+06	4.57776e+06
6641	Regions/clus7	4488	11106	0		608013	13823058	2.25834e+06	2.27732e+06	4212049
6642	Regions/clus7	4568	11106	0		618989	10500107	1.90292e+06	1.82963e+06	3.93903e+06
6643	Regions/clus7	4648	11106	0		477497	9723930	1.83504e+06	2.27751e+06	3358846
6644	Regions/clus7	4728	11106	0		974830	17222612	2.65589e+06	2.91032e+06	4.87167e+06
6645	Regions/clus7	4808	11106	0		835575	16827888	2.59742e+06	2.6739e+06	4.79736e+06
6646	Regions/clus7	4888	11106	0		672745	16753971	2.44853e+06	2.40877e+06	4.50519e+06
6647	Regions/clus7	4968	11106	0		841348	19631332	2.69811e+06	2.44647e+06	5068968
6648	Regions/clus7	5048	11106	0		781258	19245014	2.52533e+06	2184811	4969473
6649	Regions/clus7	5128	11106	0		802815	15834444	2.40238e+06	2.46967e+06	4.59181e+06
6650	Regions/clus7	5208	11106	0		654116	13380193	1.90365e+06	1745000	3.67381e+06
6651	Regions/clus7	5288	11106	0		615310	14592015	1.91993e+06	2.01852e+06	3.92299e+06
6652	Regions/clus7	5368	11106	0		755988	13186650	1.65421e+06	1664131	3.4626e+06
6653	Regions/clus7	5448	11106	0		449029	11714030	1.55593e+06	1.49541e+06	3511890
6654	Regions/clus7	5528	11106	0		694652	13352810	2.01588e+06	1528988	3.85972e+06
6655	Regions/clus7	5608	11106	0		524829	11889824	1.40068e+06	1.0914e+06	3.1531e+06
6656	Regions/clus7	5688	11106	0		415918	9595361	1.16674e+06	1.01264e+06	2.66338e+06
6657	Regions/clus7	5768	11106	0		457690	8722292	1.18484e+06	628534	2.38796e+06
6663	Regions/clus7	6248	11106	0		537850	18596028	1.90409e+06	886572	4.71817e+06
6664	Regions/clus7	6328	11106	0		472507	12590334	1.522e+06	846006	3574766
6665	Regions/clus7	6408	11106	0		521122	13520352	2.07795e+06	1.54777e+06	5247200
6667	Regions/clus7	6568	11106	0		775174	25359002	2.88629e+06	2.92945e+06	7.38053e+06
6668	Regions/clus7	6648	11106	0		622264	20837654	2.69843e+06	2.81396e+06	7.49509e+06
6669	Regions/clus7	6728	11106	0		795071	26599136	3.12415e+06	3.21622e+06	9451176
6670	Regions/clus7	6808	11106	0		558856	24319324	2.97626e+06	3.16462e+06	8441121
6673	Regions/clus7	7048	11106	0		474185	17484848	2.34341e+06	2.6738e+06	7.78391e+06
6674	Regions/clus7	7128	11106	0		397931	20108922	2.75574e+06	3.11442e+06	8832005
6675	Regions/clus7	7208	11106	0		544128	21863448	3229493	3.0924e+06	8.15244e+06
6676	Regions/clus7	7288	11106	0		384576	18851852	3.08058e+06	3022733	7.98929e+06
6677	Regions/clus7	7368	11106	0		403018	18031148	2546428	2702337	7990311
6678	Regions/clus7	7448	11106	0		461556	22795220	3227009	3072309	9345586
6679	Regions/clus7	7528	11106	0		315161	21033414	2.8299e+06	2579046	8.12155e+06
6680	Regions/clus7	7608	11106	0		322334	20584136	2.08878e+06	2734452	7.47028e+06
6682	Regions/clus7	7768	11106	0		282647	18067996	2.23836e+06	2.11982e+06	6420662
6690	Regions/clus7	8408	11106	0		2654.32	4.59419e+06	782787	840351	2211615
6691	Regions/clus7	8488	11106	0		2654.32	5.32308e+06	849403	852443	2.87174e+06
6692	Regions/clus7	8568	11106	0		34399.7	1.89773e+06	309464	316609	1.08526e+06
6702	Regions/clus7	3688	11026	0		134049	3.58158e+06	681042	284112	1.13696e+06
6703	Regions/clus7	3768	11026	0		77351.7	1.39473e+06	209347	172014	478961
6704	Regions/clus7	3848	11026	0		334510	7766086	1.35232e+06	1.06262e+06	2430652
6705	Regions/clus7	3928	11026	0		452630	11808915	2.55612e+06	1.30943e+06	3.27094e+06
6706	Regions/clus7	4008	11026	0		500909	12373776	2.05213e+06	1.09139e+06	3.28601e+06
6707	Regions/clus7	4088	11026	0		1.13629e+06	27925398	2.75892e+06	1.52568e+06	5820391
6709	Regions/clus7	4248	11026	0		757558	14745562	2.88836e+06	2.08082e+06	4.30814e+06
6710	Regions/clus7	4328	11026	0		624756	14103148	2572899	2.513e+06	4.64854e+06
6711	Regions/clus7	4408	11026	0		945180	16763018	2.66094e+06	2333682	4.94324e+06
6712	Regions/clus7	4488	11026	0		583962	10577985	1.72088e+06	1.38694e+06	3.04832e+06
6714	Regions/clus7	4648	11026	0		504086	10395459	1.40974e+06	1.04702e+06	2637312
6715	Regions/clus7	4728	11026	0		693682	15049751	2405533	2.41394e+06	4.45778e+06
6716	Regions/clus7	4808	11026	0		861161	14096482	2.39481e+06	2430714	3957223
6717	Regions/clus7	4888	11026	0		875568	17317438	2139805	1720283	3.94654e+06
6718	Regions/clus7	4968	11026	0		743732	14890789	1.81078e+06	1.71751e+06	3.84815e+06
6719	Regions/clus7	5048	11026	0		760018	17420938	2.02772e+06	1764356	4.12808e+06
6720	Regions/clus7	5128	11026	0		807307	13767040	2067295	1.7298e+06	3.60467e+06
6721	Regions/clus7	5208	11026	0		539438	9964573	1.73194e+06	1306862	2941549
6722	Regions/clus7	5288	11026	0		510534	9104259	1.53076e+06	1370059	2392639
6723	Regions/clus7	5368	11026	0		372378	9158564	1.35527e+06	1.00768e+06	2.80363e+06
6724	Regions/clus7	5448	11026	0		370744	6.6093e+06	1064183	608352	1.97733e+06
6725	Regions/clus7	5528	11026	0		337731	8168623	931590	651070	2366214
6726	Regions/clus7	5608	11026	0		350506	8477673	1.03565e+06	680546	2381315
6727	Regions/clus7	5688	11026	0		384869	8688864	974900	480031	2.13465e+06
6728	Regions/clus7	5768	11026	0		180522	5.70579e+06	849374	493648	1.85161e+06
6735	Regions/clus7	6568	11026	0		635650	18693428	2.24088e+06	2.4365e+06	6.20086e+06
6736	Regions/clus7	6648	11026	0		505211	16459173	2.34937e+06	1.94403e+06	6138627
6737	Regions/clus7	6728	11026	0		527777	24278608	2.81474e+06	2.74369e+06	8.0884e+06
6739	Regions/clus7	6888	11026	0		392040	19487064	2.41309e+06	2.52284e+06	7.06166e+06
6740	Regions/clus7	6968	11026	0		428075	15694063	2443147	2.31801e+06	6686616
6741	Regions/clus7	7048	11026	0		363722	16644982	2291840	2.14929e+06	6101261
6742	Regions/clus7	7128	11026	0		301572	18189570	2.19801e+06	2.55288e+06	7304187
6743	Regions/clus7	7208	11026	0		434518	19121498	1.94039e+06	2206791	6.71011e+06
6744	Regions/clus7	7288	11026	0		405828	22421898	2.32823e+06	2.54789e+06	7673291
6745	Regions/clus7	7368	11026	0		426299	19594464	2.34296e+06	2.20154e+06	7.06536e+06
6746	Regions/clus7	7448	11026	0		251502	19934150	2.48656e+06	2.66079e+06	7.38013e+06
6748	Regions/clus7	7608	11026	0		176492	15131357	1903671	2.23691e+06	6254197
6757	Regions/clus7	8328	11026	0		69400.8	4.87635e+06	590568	505647	1.82953e+06
6758	Regions/clus7	8408	11026	0		2654.32	3.24679e+06	554452	543347	1.79997e+06
6759	Regions/clus7	8488	11026	0		29162.9	1.02642e+06	210121	200895	582388
6764	Regions/clus7	3688	10946	0		153982	5242776	593162	171733	1.03143e+06
6765	Regions/clus7	3768	10946	0		112168	2.68184e+06	386811	178234	716559
6766	Regions/clus7	3848	10946	0		174607	4.71436e+06	864307	415861	1.39393e+06
6767	Regions/clus7	3928	10946	0		435888	8149205	1.8143e+06	1.21181e+06	2.43883e+06
6768	Regions/clus7	4008	10946	0		406052	10727883	1.65717e+06	784597	2529808
6769	Regions/clus7	4088	10946	0		517654	15665005	2.30673e+06	846905	3.31941e+06
6770	Regions/clus7	4168	10946	0		437558	10624086	1.74117e+06	1.23933e+06	3.05885e+06
6771	Regions/clus7	4248	10946	0		557618	12292053	2.3742e+06	1.71323e+06	3.49261e+06
6772	Regions/clus7	4328	10946	0		597493	11317840	2.31113e+06	1.75333e+06	3.80209e+06
6773	Regions/clus7	4408	10946	0		410503	8378311	1721151	1.18713e+06	2.7723e+06
6774	Regions/clus7	4488	10946	0		211187	7.22269e+06	1574386	868176	2293079
6775	Regions/clus7	4568	10946	0		238233	4695638	850080	458018	1.33608e+06
6776	Regions/clus7	4648	10946	0		443574	10006649	1.4912e+06	1.05151e+06	2.57634e+06
6777	Regions/clus7	4728	10946	0		491795	11035176	1.72548e+06	1.58758e+06	3311955
6778	Regions/clus7	4808	10946	0		505065	12286835	2062128	1.56589e+06	3.48243e+06
6779	Regions/clus7	4888	10946	0		690371	12549579	1.91253e+06	1.42161e+06	3593178
6780	Regions/clus7	4968	10946	0		407120	9060298	1.62568e+06	1.65283e+06	3080920
6781	Regions/clus7	5048	10946	0		508610	12830377	1.99958e+06	1.85049e+06	3.68482e+06
6782	Regions/clus7	5128	10946	0		401742	11425081	1.62059e+06	1.35784e+06	3.16215e+06
6783	Regions/clus7	5208	10946	0		335136	8595822	1.51576e+06	847732	2.31006e+06
6784	Regions/clus7	5288	10946	0		272414	5412499	842463	409696	1615645
6785	Regions/clus7	5368	10946	0		151900	3.11495e+06	491832	219715	941574
6786	Regions/clus7	5448	10946	0		2654.32	1.48145e+06	215935	103089	353010
6787	Regions/clus7	5528	10946	0		178697	4.11071e+06	522235	248992	1.10503e+06
6788	Regions/clus7	5608	10946	0		337230	7.49134e+06	789303	406963	1.69249e+06
6796	Regions/clus7	7128	10946	0		243887	13233564	1.97196e+06	1.56892e+06	4.3632e+06
6797	Regions/clus7	7208	10946	0		256109	16503958	1.94475e+06	2.23509e+06	6.13711e+06
6798	Regions/clus7	7288	10946	0		372416	15107126	1.75754e+06	2.04687e+06	5.42469e+06
6808	Regions/clus7	8088	10946	0		101595	8.02216e+06	767562	670666	2.35977e+06
6809	Regions/clus7	8168	10946	0		113716	7967060	658145	574346	2.15635e+06
6810	Regions/clus7	8248	10946	0		2654.32	3.13916e+06	515562	493946	1.71911e+06
6811	Regions/clus7	4088	10866	0		608186	11654261	2.50596e+06	1.75118e+06	3.5952e+06
6812	Regions/clus7	4168	10866	0		421487	9821342	2.08445e+06	1.77408e+06	3.02713e+06
6813	Regions/clus7	4248	10866	0		392352	9216072	1.88404e+06	1.5187e+06	3.30995e+06
6814	Regions/clus7	4328	10866	0		407284	9001017	1.75451e+06	1.07837e+06	3029445
6815	Regions/clus7	4408	10866	0		277047	4785131	862989	433923	1.36495e+06
6816	Regions/clus7	4488	10866	0		137521	3.50799e+06	705221	337483	1126006
6817	Regions/clus7	4568	10866	0		645108	12121669	1.96014e+06	1.11219e+06	3080567
6818	Regions/clus7	4648	10866	0		523277	10424643	2.14434e+06	1.8314e+06	3.23984e+06
6820	Regions/clus7	4808	10866	0		530841	10241429	1.16209e+06	514718	2.16841e+06
6821	Regions/clus7	4888	10866	0		483743	7927227	1.15906e+06	644924	2.08625e+06
6822	Regions/clus7	4968	10866	0		464509	9772073	1.69559e+06	1.56107e+06	2974136
6823	Regions/clus7	5048	10866	0		308775	9820649	1.95438e+06	1.43271e+06	3.34029e+06
6824	Regions/clus7	5128	10866	0		334697	8.18492e+06	1.55717e+06	990660	2.3909e+06
6825	Regions/clus7	5208	10866	0		7153532	49937036	3.35802e+06	2495679	7.17689e+06
6833	Regions/clus7	7288	10866	0		187622	12104225	1.47145e+06	1.59283e+06	4485310
6840	Regions/clus7	7848	10866	0		165339	12499674	1.1704e+06	1087396	3971062
6842	Regions/clus7	8008	10866	0		103501	6728248	791803	655433	2450191
6851	Regions/clus7	7528	10786	0		291598	12999964	1.3662e+06	1.20907e+06	3.98693e+06
6854	Regions/clus7	7768	10786	0		81659.4	9513863	1.17039e+06	1.13502e+06	3.53306e+06
6855	Regions/clus7	7048	10706	0		194791	17432220	1.75716e+06	1.70758e+06	6.29725e+06
6856	Regions/clus7	7128	10706	0		203381	15132405	1.15852e+06	1.18805e+06	4.02105e+06
6859	Regions/clus7	7368	10706	0		122073	7170419	681702	487361	2.10575e+06
6860	Regions/clus7	7448	10706	0		139466	12276279	1.11958e+06	1.07573e+06	4381930
6861	Regions/clus7	7528	10706	0		51179	3.64653e+06	403126	392866	1.40877e+06
6862	Regions/clus7	7288	10626	0		35191.5	1.45844e+06	224174	157132	614393
6869	Regions/clus7	31448	17026	0		2654.32	729323	143751	152176	242166
6877	Regions/clus7	31608	16946	0		2654.32	520709	83590.8	57013.3	161693
7026	Regions/clus7	32088	16626	0		2654.32	822607	104067	86381.2	238400
7055	Regions/clus7	28328	16546	0		274190	14329239	1.45885e+06	1.19381e+06	4072762
7056	Regions/clus7	28408	16546	0		296760	16378703	1.88298e+06	1.4985e+06	5198748
7078	Regions/clus7	32328	16546	0		2654.32	298621	65590.1	1365.31	79107.6
7106	Regions/clus7	28328	16466	0		164375	16812486	1.96013e+06	1.525e+06	5.08537e+06
7132	Regions/clus7	32488	16466	0		2654.32	342414	51910	56773.5	141689
7214	Regions/clus7	28088	16306	0		2654.32	16250934	2243342	2.23253e+06	5.84535e+06
7216	Regions/clus7	28248	16306	0		169017	19252226	2.23157e+06	1.75336e+06	5407172
7276	Regions/clus7	28168	16226	0		302613	24647746	3.20488e+06	2.15702e+06	6.99201e+06
7277	Regions/clus7	28248	16226	0		366268	24887704	2.88463e+06	2.23357e+06	7.02365e+06
7278	Regions/clus7	28328	16226	0		272896	26616128	3561119	2.37276e+06	7766389
7283	Regions/clus7	28728	16226	0		325052	25239342	2.70552e+06	2.08806e+06	6412376
7337	Regions/clus7	27928	16146	0		294965	24111668	3540250	2.32011e+06	7888221
7377	Regions/clus7	32808	16146	0		2654.32	474563	63195.1	78675.4	155431
7400	Regions/clus7	27528	16066	0		272645	28855862	3.48284e+06	2.5947e+06	9455786
7404	Regions/clus7	27848	16066	0		186280	27095264	3.54529e+06	2.48999e+06	8621812
7446	Regions/clus7	32888	16066	0		2654.32	1.16629e+06	121498	128593	368998
7447	Regions/clus7	32968	16066	0		2654.32	217859	50712.2	27016.1	93683.6
7639	Regions/clus7	29048	15826	0		202768	16234539	2.24864e+06	1.61742e+06	5.36969e+06
7640	Regions/clus7	29128	15826	0		152074	15065209	1.43978e+06	1226011	3.95209e+06
8610	Regions/clus7	24648	15026	0		2654.32	1.6828e+06	199509	158973	481517
8726	Regions/clus7	24568	14946	0		2654.32	1.22407e+06	203635	233756	433614
8843	Regions/clus7	24488	14866	0		2654.32	592651	84335	60990.5	235888
9497	Regions/clus7	29288	14466	0		368778	16960526	2.43372e+06	2.16333e+06	5834575
9931	Regions/clus7	25208	14146	0		217541	22530208	2.6122e+06	2407213	7.94761e+06
10065	Regions/clus7	26168	14066	0		2654.32	20048868	3.89443e+06	2.62012e+06	7433947
10153	Regions/clus7	33208	14066	0		203959	23656804	3.93428e+06	3368094	10182891
10177	Regions/clus7	25288	13986	0		305955	22324434	3.52711e+06	2.54508e+06	8496750
10275	Regions/clus7	33128	13986	0		223850	20166680	3683575	2.90219e+06	9320076
10278	Regions/clus7	33368	13986	0		2654.32	25331976	3.7081e+06	3.50733e+06	9897287
10287	Regions/clus7	34088	13986	0		2654.32	3.72715e+06	522115	561724	1.5393e+06
10299	Regions/clus7	25208	13906	0		298400	24469786	3.93487e+06	3.22002e+06	10876704
10300	Regions/clus7	25288	13906	0		280131	23496792	3.7449e+06	2894267	8932871
10301	Regions/clus7	25368	13906	0		325120	22719966	3.69133e+06	2.26521e+06	8558636
10398	Regions/clus7	33128	13906	0		170001	21229960	4.1355e+06	3200074	8620175
10399	Regions/clus7	33208	13906	0		355171	29470314	5006002	3.84563e+06	11947810
10400	Regions/clus7	33288	13906	0		535045	35297824	5.30016e+06	4286660	13317035
10401	Regions/clus7	33368	13906	0		272984	28666568	4314134	4.07629e+06	11912574
10420	Regions/clus7	24968	13826	0		301312	29476564	4013520	3.10137e+06	11066164
10421	Regions/clus7	25048	13826	0		214088	26761646	4364128	3.12245e+06	10716991
10422	Regions/clus7	25128	13826	0		256270	24467824	4.5015e+06	3073025	11411259
10423	Regions/clus7	25208	13826	0		269541	24258262	4.32191e+06	3209528	10694529
10424	Regions/clus7	25288	13826	0		363593	26332472	4175432	3.02881e+06	10287521
10522	Regions/clus7	33128	13826	0		237097	22250742	3809509	3367760	9101985
10523	Regions/clus7	33208	13826	0		293143	28545444	4344130	3.52591e+06	11401993
10524	Regions/clus7	33288	13826	0		253535	29089974	4253634	3.8107e+06	11339217
10526	Regions/clus7	33448	13826	0		313819	30224724	4.06737e+06	3697157	11396585
10533	Regions/clus7	34008	13826	0		83265.7	6.69808e+06	617435	513605	1.68653e+06
10534	Regions/clus7	34088	13826	0		2654.32	2998547	500160	408904	1.19576e+06
10546	Regions/clus7	25128	13746	0		367111	29736534	4.74273e+06	3213108	11772769
10547	Regions/clus7	25208	13746	0		328605	28949248	4344812	3025867	10933694
10548	Regions/clus7	25288	13746	0		407184	27508552	4382726	2.987e+06	11819496
10552	Regions/clus7	25608	13746	0		326509	23437848	4449375	2.66546e+06	9284535
10553	Regions/clus7	25688	13746	0		291011	24371948	4839741	2.79458e+06	11135296
10597	Regions/clus7	29208	13746	0		558251	23148900	3.01897e+06	2.60231e+06	8562245
10645	Regions/clus7	33048	13746	0		260224	23418322	4.08849e+06	2.91669e+06	8909489
10646	Regions/clus7	33128	13746	0		316322	23733532	4.05488e+06	3.07584e+06	9811023
10647	Regions/clus7	33208	13746	0		383137	28647432	4846087	4.22133e+06	12634344
10648	Regions/clus7	33288	13746	0		430801	29782194	4.96603e+06	4225194	12441204
10649	Regions/clus7	33368	13746	0		204037	29473218	4602419	3552976	11415691
10650	Regions/clus7	33448	13746	0		280058	32701958	4.78065e+06	3.74554e+06	12573053
10657	Regions/clus7	34008	13746	0		95192.6	9352306	876561	698257	2.35113e+06
10667	Regions/clus7	24968	13666	0		422845	30645792	4.29261e+06	3.46236e+06	11090719
10668	Regions/clus7	25048	13666	0		374952	33962496	4813273	3.38731e+06	12517371
10669	Regions/clus7	25128	13666	0		439327	34215756	4861531	3.62861e+06	12550684
10670	Regions/clus7	25208	13666	0		487471	29276420	4.73125e+06	2.99256e+06	11285409
10671	Regions/clus7	25288	13666	0		408134	27857100	4622578	3.2417e+06	11050121
10672	Regions/clus7	25368	13666	0		411525	24577308	4.29363e+06	3.28106e+06	10041457
10676	Regions/clus7	25688	13666	0		314988	24458568	4.31938e+06	2.69693e+06	10125762
10677	Regions/clus7	25768	13666	0		262531	24598628	4653018	3140061	10366293
10768	Regions/clus7	33048	13666	0		282998	19400068	3.8722e+06	2.72924e+06	8548617
10769	Regions/clus7	33128	13666	0		232092	22433622	3.87383e+06	3243998	10441864
10770	Regions/clus7	33208	13666	0		360355	29880950	4969566	3845811	12108239
10771	Regions/clus7	33288	13666	0		325375	27679672	5.06887e+06	3.71773e+06	11739984
10772	Regions/clus7	33368	13666	0		248792	29102582	4.45317e+06	3.93625e+06	12664569
10773	Regions/clus7	33448	13666	0		230672	32734708	4288934	4.05934e+06	11529427
10788	Regions/clus7	24888	13586	0		296296	30250250	4.65861e+06	3.31877e+06	10735176
10790	Regions/clus7	25048	13586	0		519376	34997556	5154222	3.74617e+06	12963308
10791	Regions/clus7	25128	13586	0		471080	33951436	5.25006e+06	3.51263e+06	12388290
10792	Regions/clus7	25208	13586	0		524699	29626096	4.46908e+06	3.31907e+06	11415554
10793	Regions/clus7	25288	13586	0		323829	26839102	4196575	2945569	9931816
10794	Regions/clus7	25368	13586	0		356516	28055628	4.9493e+06	3.03204e+06	11101108
10843	Regions/clus7	29288	13586	0		317940	20529492	2.72823e+06	2.60842e+06	7.40555e+06
10844	Regions/clus7	29368	13586	0		368830	19358130	2.82103e+06	2.55406e+06	7749594
10888	Regions/clus7	32888	13586	0		274779	19726818	4.08065e+06	2.74931e+06	9268083
10889	Regions/clus7	32968	13586	0		281950	22078450	4.59303e+06	3.04476e+06	9956124
10890	Regions/clus7	33048	13586	0		318923	22097996	5057539	3.38739e+06	11175585
10891	Regions/clus7	33128	13586	0		302408	25600564	4568187	3.39964e+06	10508589
10892	Regions/clus7	33208	13586	0		309195	30119670	4.94757e+06	3.85113e+06	12602478
10893	Regions/clus7	33288	13586	0		324421	33844288	4847647	4.32455e+06	13148477
10894	Regions/clus7	33368	13586	0		386236	32787562	4.80602e+06	3911263	11629904
10895	Regions/clus7	33448	13586	0		242228	29307874	4306529	3475433	11192626
10903	Regions/clus7	34088	13586	0		2654.32	509613	66669.8	46600	153326
10913	Regions/clus7	25128	13506	0		395141	32938872	5081698	3.52735e+06	13368919
10914	Regions/clus7	25208	13506	0		466848	30900442	5.53956e+06	3831818	12911257
10915	Regions/clus7	25288	13506	0		267506	23340228	4.34699e+06	3061527	10006561
10916	Regions/clus7	25368	13506	0		509680	27260092	4.75696e+06	3.56584e+06	11162005
10917	Regions/clus7	25448	13506	0		659525	25740344	4.53447e+06	3.15724e+06	11193120
10964	Regions/clus7	29208	13506	0		492104	24263414	3.10235e+06	2.96111e+06	8.29623e+06
10965	Regions/clus7	29288	13506	0		400276	22761086	3.55503e+06	2.90434e+06	8944499
10966	Regions/clus7	29368	13506	0		382944	18525126	2.80961e+06	2.23751e+06	6645839
11005	Regions/clus7	32488	13506	0		208191	20520832	4.07688e+06	2318837	7.07053e+06
11006	Regions/clus7	32568	13506	0		257095	21127190	4338803	2663598	8438715
11008	Regions/clus7	32728	13506	0		232976	18819108	3.95737e+06	2497349	7.73273e+06
11009	Regions/clus7	32808	13506	0		210063	18635062	3.75521e+06	2.44493e+06	7.27891e+06
11011	Regions/clus7	32968	13506	0		412901	27427348	5276819	3.25007e+06	11391402
11012	Regions/clus7	33048	13506	0		218571	21459906	4208560	2.9102e+06	10752476
11013	Regions/clus7	33128	13506	0		353203	28693038	4.66572e+06	3661052	11858386
11014	Regions/clus7	33208	13506	0		489263	34066528	5.00696e+06	3.90413e+06	13342745
11015	Regions/clus7	33288	13506	0		314007	29790478	5.09142e+06	3.75403e+06	12315706
11016	Regions/clus7	33368	13506	0		330178	33565424	4774772	3.94838e+06	13411681
11017	Regions/clus7	33448	13506	0		221829	27112480	3892382	3013858	10620754
11024	Regions/clus7	34008	13506	0		50340.8	4.15282e+06	624323	547401	1.48846e+06
11033	Regions/clus7	25048	13426	0		474284	34444060	5.05351e+06	3.67656e+06	13251053
11034	Regions/clus7	25128	13426	0		482033	29364646	4.80123e+06	3.10333e+06	11688285
11035	Regions/clus7	25208	13426	0		483168	30446508	5777742	3.69388e+06	13541388
11036	Regions/clus7	25288	13426	0		583110	28282294	4.35529e+06	3.00052e+06	11707444
11037	Regions/clus7	25368	13426	0		293825	28129632	4247334	3.10397e+06	11340228
11038	Regions/clus7	25448	13426	0		470547	25986324	4778488	2.81945e+06	11621735
11041	Regions/clus7	25688	13426	0		466916	25987496	4812440	2773474	10734814
11042	Regions/clus7	25768	13426	0		286698	24000888	4208072	2.8197e+06	9669434
11085	Regions/clus7	29208	13426	0		484034	21695536	2.69034e+06	2.2988e+06	7149817
11086	Regions/clus7	29288	13426	0		430446	22341620	2.76082e+06	2681000	7.83386e+06
11087	Regions/clus7	29368	13426	0		429821	18605764	3026402	2325393	6.61132e+06
11128	Regions/clus7	32648	13426	0		153045	18969028	4.39072e+06	2394202	7.93238e+06
11130	Regions/clus7	32808	13426	0		325169	20284218	4294860	3029392	8423031
11132	Regions/clus7	32968	13426	0		505102	27917454	5524012	3.50071e+06	12002800
11133	Regions/clus7	33048	13426	0		410890	23070994	4.35111e+06	3.29907e+06	11082837
11134	Regions/clus7	33128	13426	0		334352	25624946	4948243	3.46288e+06	12071025
11135	Regions/clus7	33208	13426	0		347706	30576928	4.7362e+06	3.34672e+06	12316432
11136	Regions/clus7	33288	13426	0		393082	34218044	4645942	3.93317e+06	12431206
11137	Regions/clus7	33368	13426	0		287062	32880264	4588810	3.79195e+06	11749076
11138	Regions/clus7	33448	13426	0		343901	30518122	4.10359e+06	3.19078e+06	11118580
11139	Regions/clus7	33528	13426	0		342642	24127310	3.15352e+06	2.92525e+06	8896113
11155	Regions/clus7	25208	13346	0		410126	31605136	5575714	3.26836e+06	12903153
11156	Regions/clus7	25288	13346	0		609837	33762456	4713503	3.43861e+06	12702863
11157	Regions/clus7	25368	13346	0		449391	26813106	4.6038e+06	2841959	11156073
11158	Regions/clus7	25448	13346	0		475713	22338426	4.20672e+06	2.94427e+06	10480532
11159	Regions/clus7	25528	13346	0		387710	25865528	4.2479e+06	2.9776e+06	10284961
11161	Regions/clus7	25688	13346	0		472147	30933618	5176106	3.07827e+06	11468915
11162	Regions/clus7	25768	13346	0		485405	28642078	4.78928e+06	3173874	10934820
11243	Regions/clus7	32248	13346	0		419501	24857584	5.26841e+06	3461898	8492520
11244	Regions/clus7	32328	13346	0		356902	19700270	3.52875e+06	2.49525e+06	7.13492e+06
11246	Regions/clus7	32488	13346	0		191581	16019234	3.52604e+06	2.19361e+06	6.67419e+06
11247	Regions/clus7	32568	13346	0		213446	18216578	3.78198e+06	2.6399e+06	7.94623e+06
11248	Regions/clus7	32648	13346	0		302677	21825278	4.6418e+06	2381976	9039380
11249	Regions/clus7	32728	13346	0		301508	19739002	3831295	2507154	8.0327e+06
11250	Regions/clus7	32808	13346	0		241543	19584782	4.20403e+06	2.32368e+06	9258185
11252	Regions/clus7	32968	13346	0		305280	22974040	4.47859e+06	3020835	11204941
11253	Regions/clus7	33048	13346	0		391970	27460322	4563017	3.38627e+06	12333434
11254	Regions/clus7	33128	13346	0		381801	32074228	5.49735e+06	3.99787e+06	13331585
11255	Regions/clus7	33208	13346	0		377656	31941020	4961814	3.80869e+06	12943028
11256	Regions/clus7	33288	13346	0		402505	33892172	4.63505e+06	3523111	13069541
11257	Regions/clus7	33368	13346	0		431115	28943200	4325309	3.11892e+06	10735565
11259	Regions/clus7	33528	13346	0		354792	25728984	3.27258e+06	3211623	8580492
11272	Regions/clus7	25048	13266	0		493860	33396736	5033651	3124230	11527723
11273	Regions/clus7	25128	13266	0		496328	33680732	5252269	2.97408e+06	12544237
11274	Regions/clus7	25208	13266	0		624696	31558746	5493730	2.86603e+06	12684628
11275	Regions/clus7	25288	13266	0		746966	37871168	5.79128e+06	3.26792e+06	14383661
11276	Regions/clus7	25368	13266	0		600691	28916494	5090021	2.99203e+06	11322055
11277	Regions/clus7	25448	13266	0		609134	26049188	4801612	3.06288e+06	11551635
11278	Regions/clus7	25528	13266	0		570554	27719122	4251584	3.13763e+06	10144109
11280	Regions/clus7	25688	13266	0		464525	30150920	4938535	3.14264e+06	11058891
11281	Regions/clus7	25768	13266	0		451629	25126074	4.4501e+06	2824662	10317378
11282	Regions/clus7	25848	13266	0		539922	23188580	4.05352e+06	3.21723e+06	9597450
11284	Regions/clus7	26008	13266	0		270439	20625560	3.75011e+06	2.32352e+06	7420699
11285	Regions/clus7	26088	13266	0		212200	17211368	3.09e+06	1.74861e+06	5796239
11286	Regions/clus7	26168	13266	0		520242	22313236	4059030	2.64679e+06	7.91269e+06
11325	Regions/clus7	29288	13266	0		355190	16778390	2961809	2099393	6388959
11326	Regions/clus7	29368	13266	0		305475	18665406	2.90601e+06	2.8263e+06	6.40614e+06
11361	Regions/clus7	32168	13266	0		749206	24010760	4.45577e+06	2.95178e+06	7.81861e+06
11363	Regions/clus7	32328	13266	0		516294	24294250	4634786	2.97311e+06	8572002
11366	Regions/clus7	32568	13266	0		322230	25688902	4975638	2.78032e+06	10434967
11367	Regions/clus7	32648	13266	0		342959	21826700	4.47284e+06	2.8475e+06	9572537
11368	Regions/clus7	32728	13266	0		2654.32	17587072	3438174	2.64478e+06	8017144
11369	Regions/clus7	32808	13266	0		302423	19634566	4089841	2.26031e+06	9089449
11371	Regions/clus7	32968	13266	0		379973	22802812	4.50946e+06	3043792	11173779
11372	Regions/clus7	33048	13266	0		494495	31961988	5.60654e+06	3.89828e+06	14432006
11373	Regions/clus7	33128	13266	0		546104	30561972	4800042	3.63245e+06	12507675
11374	Regions/clus7	33208	13266	0		359606	27033706	4686950	3.56986e+06	12265340
11375	Regions/clus7	33288	13266	0		360714	29272372	4.85525e+06	3.28176e+06	12102813
11376	Regions/clus7	33368	13266	0		409987	27822214	3.99572e+06	3.05453e+06	9971328
11377	Regions/clus7	33448	13266	0		288050	23113160	3.63335e+06	2.89602e+06	8739945
11378	Regions/clus7	33528	13266	0		305725	23058340	3.05303e+06	2.46633e+06	8.23685e+06
11383	Regions/clus7	33928	13266	0		62504.4	4463641	529098	472446	1.43022e+06
11391	Regions/clus7	25048	13186	0		498340	34793712	5.01059e+06	3.31997e+06	12229134
11392	Regions/clus7	25128	13186	0		498134	31796612	4.69643e+06	3.20531e+06	11615877
11393	Regions/clus7	25208	13186	0		424711	25216972	5.03139e+06	3.16569e+06	10580839
11394	Regions/clus7	25288	13186	0		681727	28022376	5.17063e+06	3186868	11141187
11395	Regions/clus7	25368	13186	0		518137	28656044	4.89576e+06	3.07948e+06	12109559
11396	Regions/clus7	25448	13186	0		494608	27414098	4744881	3.27734e+06	11640167
11397	Regions/clus7	25528	13186	0		495583	28567232	5.07738e+06	2903821	11595978
11399	Regions/clus7	25688	13186	0		504791	27089466	5.11337e+06	3.35682e+06	10194598
11400	Regions/clus7	25768	13186	0		269116	26212348	4763071	2.9613e+06	11071940
11401	Regions/clus7	25848	13186	0		539059	31121394	4.93742e+06	3.3447e+06	10872607
11402	Regions/clus7	25928	13186	0		584554	34321380	5.52584e+06	3177198	11965484
11403	Regions/clus7	26008	13186	0		689786	35371912	6.45929e+06	3.59907e+06	13883236
11404	Regions/clus7	26088	13186	0		295898	19566230	3.08728e+06	1976833	7.33733e+06
11405	Regions/clus7	26168	13186	0		398081	20830628	3.7752e+06	2.61742e+06	7639825
11437	Regions/clus7	28728	13186	0		404460	15142210	2748366	1.54259e+06	5905335
11443	Regions/clus7	29208	13186	0		631305	25091496	3.88965e+06	3.16886e+06	9240605
11444	Regions/clus7	29288	13186	0		407542	21631842	3.56866e+06	2.90756e+06	7159425
11445	Regions/clus7	29368	13186	0		371580	18676016	2.87679e+06	2.34245e+06	6.00156e+06
11446	Regions/clus7	29448	13186	0		522332	18739640	2.89481e+06	2.86374e+06	6.65004e+06
11447	Regions/clus7	29528	13186	0		519167	16596088	2.12923e+06	2.10328e+06	6086257
11449	Regions/clus7	29688	13186	0		467118	17109458	3176793	2.37394e+06	5.74905e+06
11450	Regions/clus7	29768	13186	0		671859	19562096	3.16628e+06	2.96476e+06	6.9148e+06
11478	Regions/clus7	32008	13186	0		528360	18282732	3.18335e+06	2.44867e+06	5.75248e+06
11479	Regions/clus7	32088	13186	0		725045	23766604	4.19348e+06	3.19706e+06	6.86463e+06
11480	Regions/clus7	32168	13186	0		553250	22576304	3984575	2.89301e+06	7484699
11481	Regions/clus7	32248	13186	0		466820	25159088	4161713	2.83254e+06	7.98539e+06
11482	Regions/clus7	32328	13186	0		339181	24928346	4.98906e+06	3.40553e+06	9605876
11483	Regions/clus7	32408	13186	0		337021	20248644	4013297	2602270	9034856
11484	Regions/clus7	32488	13186	0		260730	23140454	4.26504e+06	3.08075e+06	8512599
11485	Regions/clus7	32568	13186	0		365540	25872628	4994249	3.5904e+06	10917305
11486	Regions/clus7	32648	13186	0		298147	21049986	4435892	3.1232e+06	9732374
11487	Regions/clus7	32728	13186	0		171151	17724422	3372804	2.18752e+06	7.82867e+06
11488	Regions/clus7	32808	13186	0		271786	21256886	4249648	3.09667e+06	9326872
11490	Regions/clus7	32968	13186	0		481161	27077350	5.35494e+06	3.42335e+06	12507859
11491	Regions/clus7	33048	13186	0		493237	29450388	5404300	3741130	13576372
11492	Regions/clus7	33128	13186	0		415418	30477160	5848028	3.81719e+06	12840539
11493	Regions/clus7	33208	13186	0		463633	28761124	4853401	3.37976e+06	12109983
11494	Regions/clus7	33288	13186	0		415424	27320276	5.42089e+06	3696735	11247283
11495	Regions/clus7	33368	13186	0		383219	30140896	4.295e+06	3.50808e+06	11235672
11496	Regions/clus7	33448	13186	0		443906	27203010	3.47982e+06	2.85937e+06	9742394
11497	Regions/clus7	33528	13186	0		238119	22807014	2.76933e+06	2.21364e+06	6765362
11502	Regions/clus7	33928	13186	0		47678	2.97757e+06	410463	230764	906328
11507	Regions/clus7	24888	13106	0		351566	35420864	4.67036e+06	3.24077e+06	10813007
11508	Regions/clus7	24968	13106	0		454485	38113608	4771096	3.3412e+06	12173182
11509	Regions/clus7	25048	13106	0		425197	31939582	5.0214e+06	3.14106e+06	10764491
11510	Regions/clus7	25128	13106	0		410553	31663026	4.83831e+06	3.02228e+06	11252156
11511	Regions/clus7	25208	13106	0		558604	30209036	4.60525e+06	2.93556e+06	10923540
11512	Regions/clus7	25288	13106	0		713910	27172264	4930813	2.63799e+06	10966920
11513	Regions/clus7	25368	13106	0		458850	26924030	4.69745e+06	3.41939e+06	11114806
11514	Regions/clus7	25448	13106	0		590820	28743560	5160176	3.39406e+06	11564186
11515	Regions/clus7	25528	13106	0		553333	27695562	5.48134e+06	3250969	11889745
11517	Regions/clus7	25688	13106	0		426718	28727730	4.9494e+06	3.41249e+06	11156611
11518	Regions/clus7	25768	13106	0		314960	23098408	4.4434e+06	2717193	9175336
11519	Regions/clus7	25848	13106	0		405382	27539446	5070217	3081282	11109736
11520	Regions/clus7	25928	13106	0		622169	31302254	5.47633e+06	3768485	13236293
11521	Regions/clus7	26008	13106	0		526659	26596372	4814827	2.83679e+06	11153256
11522	Regions/clus7	26088	13106	0		471108	23273670	4.82213e+06	3.2798e+06	9542582
11523	Regions/clus7	26168	13106	0		426493	22654232	4125679	2.82119e+06	8447758
11524	Regions/clus7	26248	13106	0		556567	23052682	4.06796e+06	2.89612e+06	7374000
11525	Regions/clus7	26328	13106	0		664616	23958088	4643327	2527945	7389141
11556	Regions/clus7	28808	13106	0		539599	19713542	2.82404e+06	2.49547e+06	7.12579e+06
11557	Regions/clus7	28888	13106	0		655089	20314970	3.27753e+06	2.56205e+06	6.63445e+06
11558	Regions/clus7	28968	13106	0		557530	25735942	3681188	3.08161e+06	9023665
11560	Regions/clus7	29128	13106	0		755484	24429964	4.13967e+06	3.04746e+06	8.34473e+06
11561	Regions/clus7	29208	13106	0		738246	23176904	3.37938e+06	3.21748e+06	8141348
11562	Regions/clus7	29288	13106	0		705717	24028868	3.69629e+06	2.83551e+06	7.90693e+06
11563	Regions/clus7	29368	13106	0		724582	22023832	3.98736e+06	3328303	8394546
11564	Regions/clus7	29448	13106	0		651865	26630278	3.9371e+06	3.33368e+06	8.22608e+06
11565	Regions/clus7	29528	13106	0		600782	22480532	3329981	2.8856e+06	6803584
11566	Regions/clus7	29608	13106	0		702840	22401888	3.82342e+06	2.8186e+06	6.4034e+06
11567	Regions/clus7	29688	13106	0		551593	20659938	3.11771e+06	2746283	6655621
11568	Regions/clus7	29768	13106	0		739552	19339488	3.25298e+06	2.4823e+06	6451972
11594	Regions/clus7	31848	13106	0		955053	21595194	3.88218e+06	2819604	6529873
11595	Regions/clus7	31928	13106	0		896744	24660238	4574215	3.12012e+06	6.91988e+06
11596	Regions/clus7	32008	13106	0		634213	22172236	4.44336e+06	2.9937e+06	6901185
11597	Regions/clus7	32088	13106	0		609080	25994532	4.35286e+06	3067894	9025012
11598	Regions/clus7	32168	13106	0		546873	24107334	4.82723e+06	3091684	9040806
11599	Regions/clus7	32248	13106	0		537060	23067488	4533776	2.84658e+06	8633637
11600	Regions/clus7	32328	13106	0		526414	25086244	4923153	3193251	10523739
11601	Regions/clus7	32408	13106	0		406216	22001996	4516209	2.80033e+06	9226593
11602	Regions/clus7	32488	13106	0		266888	20067802	3851242	2.40775e+06	9230878
11603	Regions/clus7	32568	13106	0		389559	21341006	4461469	3.19567e+06	10261924
11605	Regions/clus7	32728	13106	0		340239	22645056	4.48098e+06	2.79155e+06	10184650
11606	Regions/clus7	32808	13106	0		469279	23056064	4606374	3.07669e+06	10610661
11607	Regions/clus7	32888	13106	0		252864	21187120	4.35414e+06	3.11444e+06	10183368
11608	Regions/clus7	32968	13106	0		502615	25769234	4.82158e+06	3.06768e+06	11506471
11609	Regions/clus7	33048	13106	0		438238	27962862	5.69062e+06	3.48317e+06	12607737
11610	Regions/clus7	33128	13106	0		335037	28294468	5107718	3.46315e+06	12063554
11611	Regions/clus7	33208	13106	0		472865	31755522	5423445	3840505	13262307
11612	Regions/clus7	33288	13106	0		564370	30853788	5.18144e+06	3.53698e+06	12014810
11613	Regions/clus7	33368	13106	0		374281	29550642	4510658	3.32471e+06	10701998
11614	Regions/clus7	33448	13106	0		436260	26273792	3488370	2936081	8804832
11615	Regions/clus7	33528	13106	0		351607	18437486	2842362	1.91084e+06	6.62047e+06
11616	Regions/clus7	33608	13106	0		149063	17992696	2.10871e+06	1.83216e+06	5.95978e+06
11624	Regions/clus7	24888	13026	0		360224	31764220	3.97054e+06	2.77206e+06	9223263
11625	Regions/clus7	24968	13026	0		403125	33757004	4256865	2.98755e+06	9979271
11626	Regions/clus7	25048	13026	0		527566	33593900	4.45384e+06	2.9903e+06	10677464
11627	Regions/clus7	25128	13026	0		668148	35440084	4999643	3.20662e+06	11843421
11628	Regions/clus7	25208	13026	0		667548	30176236	4.73914e+06	2.84189e+06	10451657
11629	Regions/clus7	25288	13026	0		424745	30069408	5158002	3537593	12445789
11630	Regions/clus7	25368	13026	0		471950	25299598	4966404	2.96485e+06	11929033
11631	Regions/clus7	25448	13026	0		493715	28289856	4.77395e+06	3.38641e+06	12177789
11632	Regions/clus7	25528	13026	0		380921	28357574	5092643	3.58813e+06	12414384
11633	Regions/clus7	25608	13026	0		454477	27843270	5080108	3.54382e+06	11421852
11634	Regions/clus7	25688	13026	0		543878	27928604	5.33106e+06	3.29321e+06	11610936
11635	Regions/clus7	25768	13026	0		549017	26347650	4899368	3568415	10609390
11636	Regions/clus7	25848	13026	0		494329	24498450	4.49574e+06	3.33272e+06	9818267
11637	Regions/clus7	25928	13026	0		610629	27931340	4.53704e+06	3.03142e+06	10315970
11638	Regions/clus7	26008	13026	0		481085	23643836	4387734	2.94403e+06	8723600
11639	Regions/clus7	26088	13026	0		522764	22402504	4.25831e+06	2813044	8296776
11640	Regions/clus7	26168	13026	0		604483	25686398	4273579	2849299	8692255
11641	Regions/clus7	26248	13026	0		419086	22248682	3.77176e+06	2.60036e+06	7.97613e+06
11642	Regions/clus7	26328	13026	0		495728	22283058	4.48718e+06	2857707	7837413
11643	Regions/clus7	26408	13026	0		549122	17058888	3613109	2.17702e+06	5.10752e+06
11644	Regions/clus7	26488	13026	0		564482	18132434	3275536	2.75808e+06	5354734
11645	Regions/clus7	26568	13026	0		687417	22969660	3957996	2730797	6018550
11646	Regions/clus7	26648	13026	0		445687	17770960	2.70046e+06	1.86169e+06	4.40443e+06
11673	Regions/clus7	28808	13026	0		758605	24371438	3.76842e+06	3.25945e+06	7884163
11674	Regions/clus7	28888	13026	0		587210	20083104	3304382	2.58269e+06	6641466
11675	Regions/clus7	28968	13026	0		588278	24024488	3.65372e+06	3.13769e+06	7.6593e+06
11676	Regions/clus7	29048	13026	0		548467	23724406	3.56638e+06	2.98107e+06	7.88771e+06
11677	Regions/clus7	29128	13026	0		688872	23631642	3.74121e+06	3.09132e+06	7.69711e+06
11678	Regions/clus7	29208	13026	0		958468	24363698	3427072	3.36768e+06	7.14371e+06
11679	Regions/clus7	29288	13026	0		924832	27461248	4.08701e+06	3.80554e+06	8688841
11680	Regions/clus7	29368	13026	0		801420	27919490	4.35415e+06	3487636	8484848
11681	Regions/clus7	29448	13026	0		780191	26409386	4.1454e+06	3.82492e+06	9217200
11682	Regions/clus7	29528	13026	0		610932	23065970	3.52732e+06	3.38131e+06	7409485
11683	Regions/clus7	29608	13026	0		932989	23268740	3.71747e+06	3.01551e+06	7122462
11685	Regions/clus7	29768	13026	0		880838	16636350	3.09462e+06	1.98333e+06	4.79315e+06
11686	Regions/clus7	29848	13026	0		727585	19473666	2.66172e+06	2.58247e+06	5.12499e+06
11687	Regions/clus7	29928	13026	0		717213	18703284	2.84672e+06	2.5228e+06	5.46649e+06
11711	Regions/clus7	31848	13026	0		651269	16647389	2.94121e+06	2.45176e+06	4993425
11712	Regions/clus7	31928	13026	0		757199	20262804	3572013	2.84421e+06	6.54155e+06
11714	Regions/clus7	32088	13026	0		834350	23389490	4760983	3.52914e+06	8843662
11715	Regions/clus7	32168	13026	0		689299	24148016	4661236	3617566	9372996
11716	Regions/clus7	32248	13026	0		624156	23889562	4594973	3.63231e+06	9054840
11717	Regions/clus7	32328	13026	0		519961	25774508	4673871	3.31065e+06	10466687
11719	Regions/clus7	32488	13026	0		399985	21229094	4347819	2.6136e+06	9224586
11720	Regions/clus7	32568	13026	0		375819	24062864	4585637	3.29007e+06	10758226
11721	Regions/clus7	32648	13026	0		321227	23288940	4505447	3237568	11032568
11722	Regions/clus7	32728	13026	0		366231	21116180	4.53304e+06	3.20611e+06	11127232
11723	Regions/clus7	32808	13026	0		427026	21444490	4420952	2.74826e+06	10726250
11724	Regions/clus7	32888	13026	0		388187	22442976	4.07849e+06	2.78702e+06	10539647
11725	Regions/clus7	32968	13026	0		419463	22462064	4.41601e+06	2.65878e+06	10096894
11726	Regions/clus7	33048	13026	0		536026	28703924	5.20854e+06	3.32745e+06	12139347
11727	Regions/clus7	33128	13026	0		508732	31421268	4.68584e+06	3527492	12602923
11728	Regions/clus7	33208	13026	0		403265	30236798	4439095	3356124	11465486
11729	Regions/clus7	33288	13026	0		452370	31505532	4.57259e+06	3.43843e+06	11463419
11731	Regions/clus7	33448	13026	0		300413	23012600	3.39971e+06	2394663	8398537
11732	Regions/clus7	33528	13026	0		332090	20112892	2341393	2.08308e+06	6.49667e+06
11741	Regions/clus7	24888	12946	0		435439	31936794	3.51264e+06	2.70546e+06	8943208
11742	Regions/clus7	24968	12946	0		501784	38610196	4.12142e+06	2967648	10504890
11743	Regions/clus7	25048	12946	0		497739	36694636	4.55442e+06	3290450	11599196
11744	Regions/clus7	25128	12946	0		527055	35471868	4.92081e+06	3.45295e+06	11586113
11745	Regions/clus7	25208	12946	0		543349	30748770	4844114	3236111	10935737
11746	Regions/clus7	25288	12946	0		339703	28852252	4502117	3.06791e+06	10278399
11747	Regions/clus7	25368	12946	0		628932	33620208	5319261	3.24044e+06	12857936
11748	Regions/clus7	25448	12946	0		601460	31349412	5528968	3.23331e+06	12746279
11749	Regions/clus7	25528	12946	0		626797	29958192	5261177	3.51243e+06	12655939
11750	Regions/clus7	25608	12946	0		720617	27011290	5.21056e+06	3.19759e+06	11672852
11751	Regions/clus7	25688	12946	0		551351	26558544	5356107	3.17186e+06	11930261
11752	Regions/clus7	25768	12946	0		577091	23282052	4.86804e+06	2847196	11022649
11753	Regions/clus7	25848	12946	0		511586	27623562	4621082	3.03289e+06	11167546
11754	Regions/clus7	25928	12946	0		528229	29241070	5.23813e+06	3.62404e+06	11557643
11755	Regions/clus7	26008	12946	0		589232	24836488	5113004	3.20024e+06	10555531
11756	Regions/clus7	26088	12946	0		524755	22511508	4.09421e+06	2.84154e+06	8710493
11757	Regions/clus7	26168	12946	0		562255	23786144	4487677	3.09679e+06	8.26359e+06
11758	Regions/clus7	26248	12946	0		633949	25825138	4858865	3.29465e+06	8562141
11759	Regions/clus7	26328	12946	0		520259	24379966	3.96726e+06	3.00604e+06	7.98306e+06
11760	Regions/clus7	26408	12946	0		467463	23006882	3.78797e+06	3.23795e+06	7174351
11761	Regions/clus7	26488	12946	0		767521	24037354	4239404	2.69632e+06	7.5084e+06
11762	Regions/clus7	26568	12946	0		531699	20108080	3.15128e+06	2.65899e+06	5.26453e+06
11763	Regions/clus7	26648	12946	0		614136	21608680	3198932	2.47386e+06	4.94887e+06
11790	Regions/clus7	28808	12946	0		965842	22236278	3.44078e+06	2.66824e+06	6830626
11791	Regions/clus7	28888	12946	0		721634	21063774	4016701	2.86943e+06	7391565
11792	Regions/clus7	28968	12946	0		884608	23680304	4.13081e+06	2.91782e+06	8.04514e+06
11793	Regions/clus7	29048	12946	0		807205	26218218	3.99671e+06	3.20868e+06	8026677
11794	Regions/clus7	29128	12946	0		821980	26717686	4.13106e+06	3.50088e+06	7897063
11795	Regions/clus7	29208	12946	0		885017	23086086	4.11002e+06	2.98974e+06	7098718
11796	Regions/clus7	29288	12946	0		993976	27821516	4.71387e+06	3.88515e+06	8783804
11797	Regions/clus7	29368	12946	0		1.20201e+06	30999868	4572230	3.97607e+06	9740762
11798	Regions/clus7	29448	12946	0		717036	24127454	3.91627e+06	3277966	7532081
11799	Regions/clus7	29528	12946	0		817060	22305108	3.56211e+06	3.32263e+06	6.53933e+06
11800	Regions/clus7	29608	12946	0		875349	21534668	3.39619e+06	3047686	6.57872e+06
11801	Regions/clus7	29688	12946	0		724547	20707810	3.65556e+06	3179883	6320195
11802	Regions/clus7	29768	12946	0		1.14284e+06	25892156	4.19289e+06	3.25343e+06	6.78058e+06
11803	Regions/clus7	29848	12946	0		1.08299e+06	23090230	3.66752e+06	3.33927e+06	6390403
11804	Regions/clus7	29928	12946	0		816909	18108614	2.76875e+06	2.56682e+06	5.57663e+06
11805	Regions/clus7	30008	12946	0		1.16181e+06	18571584	2.77248e+06	2.6529e+06	4317732
11828	Regions/clus7	31848	12946	0		889710	21008010	3.9187e+06	2861227	6.70111e+06
11829	Regions/clus7	31928	12946	0		863769	21375178	4.48606e+06	3.20286e+06	7.36962e+06
11830	Regions/clus7	32008	12946	0		881437	24198218	4.6304e+06	3.22784e+06	7895749
11831	Regions/clus7	32088	12946	0		561769	21143488	4605099	3008146	8.38028e+06
11832	Regions/clus7	32168	12946	0		605140	23655612	4.35887e+06	3.24185e+06	9073554
11833	Regions/clus7	32248	12946	0		494128	25060296	4.687e+06	2805585	9815537
11834	Regions/clus7	32328	12946	0		461973	22044896	4.79942e+06	3.12217e+06	9626272
11835	Regions/clus7	32408	12946	0		288062	19253936	4.29434e+06	2.87663e+06	9220794
11836	Regions/clus7	32488	12946	0		252144	20142894	4.5297e+06	3.16095e+06	9737473
11837	Regions/clus7	32568	12946	0		391940	19822264	3.90198e+06	3.02366e+06	9325666
11838	Regions/clus7	32648	12946	0		406490	21700466	4.65585e+06	3.03962e+06	11523221
11839	Regions/clus7	32728	12946	0		412126	21983870	4635153	3298971	9543105
11840	Regions/clus7	32808	12946	0		311983	22030950	4.14805e+06	2.94402e+06	10097813
11841	Regions/clus7	32888	12946	0		428736	24400490	4849134	3.24232e+06	11210449
11843	Regions/clus7	33048	12946	0		499274	29441600	4.16859e+06	3.16401e+06	11417816
11844	Regions/clus7	33128	12946	0		498609	32699540	5152223	3.72966e+06	12728379
11845	Regions/clus7	33208	12946	0		524914	35968040	4893433	3.60223e+06	12731359
11846	Regions/clus7	33288	12946	0		327654	30452784	4058636	3.19388e+06	11119819
11847	Regions/clus7	33368	12946	0		402661	30437722	4.48119e+06	3428822	11713503
11848	Regions/clus7	33448	12946	0		284052	24113566	3520789	2.61201e+06	9201576
11849	Regions/clus7	33528	12946	0		302323	23282264	2.83608e+06	2.03571e+06	7841698
11858	Regions/clus7	25048	12866	0		433999	32309116	4678763	3249988	10221672
11859	Regions/clus7	25128	12866	0		464607	33452460	4.53673e+06	3099940	11272051
11860	Regions/clus7	25208	12866	0		524042	27771002	4364127	3073502	10088902
11861	Regions/clus7	25288	12866	0		460698	26652880	4583827	2.70198e+06	9848758
11862	Regions/clus7	25368	12866	0		504319	29540706	5020184	3.29089e+06	11483313
11863	Regions/clus7	25448	12866	0		639597	30907078	5.05714e+06	3.26863e+06	12473896
11864	Regions/clus7	25528	12866	0		439961	22035456	4.23134e+06	3.14932e+06	10137144
11865	Regions/clus7	25608	12866	0		519840	27547794	5.17526e+06	3.42257e+06	11224095
11866	Regions/clus7	25688	12866	0		453137	28017130	4935166	3.47379e+06	11483612
11867	Regions/clus7	25768	12866	0		386860	27708716	4604230	3.35166e+06	11814332
11868	Regions/clus7	25848	12866	0		697163	29069680	5338081	3.73646e+06	12511169
11869	Regions/clus7	25928	12866	0		449395	24610488	4.90287e+06	3512366	11251881
11870	Regions/clus7	26008	12866	0		558107	27370814	4.50694e+06	3.58361e+06	11593277
11871	Regions/clus7	26088	12866	0		471994	24387306	4.3557e+06	3.03815e+06	9279460
11872	Regions/clus7	26168	12866	0		711382	25758504	4.96041e+06	3.29426e+06	9804419
11873	Regions/clus7	26248	12866	0		546317	23992264	4.16959e+06	2.99347e+06	7661409
11874	Regions/clus7	26328	12866	0		612407	25979472	4.87991e+06	3218081	8.1783e+06
11875	Regions/clus7	26408	12866	0		709572	22901100	4.10498e+06	3.19495e+06	7.027e+06
11876	Regions/clus7	26488	12866	0		700684	22318680	3.80493e+06	2.77193e+06	6703948
11877	Regions/clus7	26568	12866	0		769573	20981544	3.66058e+06	2.57616e+06	5.57402e+06
11882	Regions/clus7	26968	12866	0		812257	18062628	2.30857e+06	1.80401e+06	3.44303e+06
11904	Regions/clus7	28728	12866	0		1.10976e+06	21674538	3679634	2.65245e+06	6.67634e+06
11905	Regions/clus7	28808	12866	0		1.21494e+06	24180172	4.01476e+06	2.77632e+06	7.27927e+06
11906	Regions/clus7	28888	12866	0		845054	21778892	3.44237e+06	2.86484e+06	6732058
11907	Regions/clus7	28968	12866	0		943826	20333298	3685561	2.85924e+06	6590114
11908	Regions/clus7	29048	12866	0		959567	24020054	4.09534e+06	3.27611e+06	7164334
11909	Regions/clus7	29128	12866	0		965028	25087232	4303575	3439603	7.93086e+06
11910	Regions/clus7	29208	12866	0		1.07127e+06	26300594	4.23693e+06	3.34927e+06	7415434
11911	Regions/clus7	29288	12866	0		1.09541e+06	27572072	4349287	3632706	8920944
11912	Regions/clus7	29368	12866	0		988976	26528826	4519648	3.90031e+06	8430884
11913	Regions/clus7	29448	12866	0		1.51294e+06	29790126	4.78462e+06	3.55738e+06	8223910
11914	Regions/clus7	29528	12866	0		957533	25846158	3918858	3.29973e+06	7.44596e+06
11915	Regions/clus7	29608	12866	0		861218	22581914	3.73136e+06	3.34784e+06	6781061
11916	Regions/clus7	29688	12866	0		1.27085e+06	23968248	4056739	3.63377e+06	7.33677e+06
11917	Regions/clus7	29768	12866	0		1.31924e+06	24388408	3501480	2.93276e+06	6.28502e+06
11918	Regions/clus7	29848	12866	0		1.39181e+06	21645836	3.72311e+06	3.24644e+06	6098249
11919	Regions/clus7	29928	12866	0		722270	16706295	2.68671e+06	2.64145e+06	4.1393e+06
11920	Regions/clus7	30008	12866	0		1.1229e+06	18189758	2895821	2.87019e+06	4.86232e+06
11921	Regions/clus7	30088	12866	0		1.10748e+06	20023930	2.753e+06	2.67304e+06	4877990
11922	Regions/clus7	30168	12866	0		959996	19008968	3.04415e+06	2.58097e+06	4333173
11938	Regions/clus7	31448	12866	0		1.18064e+06	23250088	4453839	3.21114e+06	6.52959e+06
11939	Regions/clus7	31528	12866	0		1.08837e+06	19568218	3746632	2668667	5161848
11942	Regions/clus7	31768	12866	0		824898	22069022	4353230	2.74654e+06	6925816
11943	Regions/clus7	31848	12866	0		828868	19238912	3.42157e+06	2.90527e+06	6127537
11944	Regions/clus7	31928	12866	0		1.09226e+06	21927646	4.55686e+06	3.09267e+06	7.48837e+06
11945	Regions/clus7	32008	12866	0		705206	24577412	4.82201e+06	4.22015e+06	9044180
11946	Regions/clus7	32088	12866	0		695025	23069056	4.41158e+06	3.31325e+06	8161346
11947	Regions/clus7	32168	12866	0		463402	19616628	4.36236e+06	2.95575e+06	8052148
11949	Regions/clus7	32328	12866	0		500187	18401892	4.02213e+06	2.85481e+06	8983103
11950	Regions/clus7	32408	12866	0		409728	19919390	4.23012e+06	2.8259e+06	9054889
11951	Regions/clus7	32488	12866	0		407317	17651756	4.39091e+06	2739345	9234246
11952	Regions/clus7	32568	12866	0		357337	22918674	4598267	2.67205e+06	10351253
11953	Regions/clus7	32648	12866	0		304028	21767922	4.24597e+06	3.26303e+06	10521416
11954	Regions/clus7	32728	12866	0		305383	22447118	4.71809e+06	3192343	11086376
11955	Regions/clus7	32808	12866	0		453113	23147522	4.77638e+06	2.95927e+06	11183590
11956	Regions/clus7	32888	12866	0		279523	28080930	5.31763e+06	3735594	12934553
11957	Regions/clus7	32968	12866	0		494446	28174958	4.63874e+06	3.47758e+06	11107571
11958	Regions/clus7	33048	12866	0		673061	34113136	5.67967e+06	3.2931e+06	13290628
11959	Regions/clus7	33128	12866	0		598835	34257812	4.70313e+06	3543749	12240371
11960	Regions/clus7	33208	12866	0		494151	34452536	4.65613e+06	3600014	12423758
11961	Regions/clus7	33288	12866	0		383623	34348100	4.42141e+06	3.40709e+06	12132329
11962	Regions/clus7	33368	12866	0		293325	28094152	4.06148e+06	3.62549e+06	10855089
11971	Regions/clus7	24888	12786	0		359369	25567214	3322520	2170466	6.94608e+06
11972	Regions/clus7	24968	12786	0		382453	30211774	4.17426e+06	2855780	8980056
11974	Regions/clus7	25128	12786	0		349992	28807194	4464805	3.19197e+06	10060728
11975	Regions/clus7	25208	12786	0		685648	30916130	4.28e+06	3035179	9646340
11976	Regions/clus7	25288	12786	0		577336	31899408	4611129	3078218	11271042
11977	Regions/clus7	25368	12786	0		520039	28047436	4.66004e+06	2.88626e+06	10458078
11978	Regions/clus7	25448	12786	0		519382	27806998	4.40771e+06	3.39028e+06	10761966
11979	Regions/clus7	25528	12786	0		704356	28042304	4.22425e+06	2809677	10949369
11980	Regions/clus7	25608	12786	0		609636	26591068	4763605	3.065e+06	11331954
11981	Regions/clus7	25688	12786	0		462734	23921230	4406856	3.2051e+06	10303574
11982	Regions/clus7	25768	12786	0		594279	25819556	4467348	3459886	10193951
11983	Regions/clus7	25848	12786	0		647710	27893794	5.05114e+06	3645923	11809422
11984	Regions/clus7	25928	12786	0		618395	25444120	4382984	3.57583e+06	9821059
11985	Regions/clus7	26008	12786	0		625235	24517504	5.0044e+06	3.16592e+06	11061944
11986	Regions/clus7	26088	12786	0		357229	23226700	4.15817e+06	3162275	9455044
11987	Regions/clus7	26168	12786	0		493455	21200712	4087047	2.72545e+06	8543184
11988	Regions/clus7	26248	12786	0		697939	23570932	4252634	3.18165e+06	8016787
11989	Regions/clus7	26328	12786	0		649253	26462126	4642957	3.3071e+06	8305792
11990	Regions/clus7	26408	12786	0		712376	23536328	3.89847e+06	3.21014e+06	7.62282e+06
11991	Regions/clus7	26488	12786	0		649360	21880366	3.93028e+06	3.05163e+06	6353553
11992	Regions/clus7	26568	12786	0		977613	25154174	3722178	3.06373e+06	6496361
11993	Regions/clus7	26648	12786	0		791096	20889558	3.41637e+06	2511930	5.09684e+06
11994	Regions/clus7	26728	12786	0		1.04608e+06	22738958	3723615	2860584	5624770
11996	Regions/clus7	26888	12786	0		946272	22733536	3508737	2507446	5.20569e+06
11997	Regions/clus7	26968	12786	0		815689	19662664	2.90384e+06	2546384	4.13033e+06
12019	Regions/clus7	28728	12786	0		1288022	24303626	3854602	3.16941e+06	7044478
12020	Regions/clus7	28808	12786	0		1.06937e+06	24179330	4.17231e+06	3.22694e+06	7.54273e+06
12021	Regions/clus7	28888	12786	0		984706	23506618	3.81474e+06	3.15514e+06	6620023
12022	Regions/clus7	28968	12786	0		1.19725e+06	27864776	4.64077e+06	3.88842e+06	8419148
12023	Regions/clus7	29048	12786	0		1.1114e+06	23007718	4.41549e+06	3.49044e+06	7478086
12024	Regions/clus7	29128	12786	0		1.09971e+06	25289288	4627649	3.46445e+06	8.19622e+06
12025	Regions/clus7	29208	12786	0		1.08614e+06	26319396	4.35066e+06	3630168	7719704
12026	Regions/clus7	29288	12786	0		735217	23555640	4308048	3.36523e+06	7.23432e+06
12027	Regions/clus7	29368	12786	0		1.18607e+06	25546476	4436064	3.33218e+06	7.8989e+06
12028	Regions/clus7	29448	12786	0		1.46566e+06	25103498	4560851	3.75744e+06	8131122
12029	Regions/clus7	29528	12786	0		1.31616e+06	24840442	3.91671e+06	3.70469e+06	6946450
12030	Regions/clus7	29608	12786	0		1.0394e+06	23596306	3.58587e+06	3.48506e+06	7.00524e+06
12031	Regions/clus7	29688	12786	0		1.22508e+06	26313134	3.87784e+06	3.35472e+06	6.68954e+06
12032	Regions/clus7	29768	12786	0		1.07582e+06	20266520	3.66961e+06	3.0018e+06	5575937
12033	Regions/clus7	29848	12786	0		1.07247e+06	22830282	3632417	3189284	5726914
12034	Regions/clus7	29928	12786	0		1.2347e+06	21247776	2.99325e+06	2.9519e+06	6.02864e+06
12035	Regions/clus7	30008	12786	0		933970	16214057	2737358	2.37589e+06	4.07878e+06
12036	Regions/clus7	30088	12786	0		1475996	25284806	3.83471e+06	3.40654e+06	6124631
12052	Regions/clus7	31368	12786	0		955370	17367462	3245262	2478854	4924291
12053	Regions/clus7	31448	12786	0		1.43041e+06	23677746	4.27386e+06	3.19314e+06	6.52582e+06
12054	Regions/clus7	31528	12786	0		1.03252e+06	21871516	3.97804e+06	3.01608e+06	6.10605e+06
12055	Regions/clus7	31608	12786	0		860386	20260128	3.70539e+06	2.57703e+06	6243777
12056	Regions/clus7	31688	12786	0		888768	18331372	3.55305e+06	2894137	6.13618e+06
12057	Regions/clus7	31768	12786	0		895997	19754568	3.79452e+06	2.77456e+06	6.18353e+06
12058	Regions/clus7	31848	12786	0		836830	20352976	4.69338e+06	2.99975e+06	7.60607e+06
12059	Regions/clus7	31928	12786	0		813233	24324366	4443475	3.37819e+06	7615669
12060	Regions/clus7	32008	12786	0		1.03752e+06	24937872	4908030	3245686	9332639
12061	Regions/clus7	32088	12786	0		715979	21774774	4.52939e+06	2.88087e+06	8585970
12062	Regions/clus7	32168	12786	0		741816	22984718	4876282	3.1033e+06	8513914
12063	Regions/clus7	32248	12786	0		510830	20325642	3.83209e+06	2672254	8345736
12064	Regions/clus7	32328	12786	0		585906	22060460	4.56403e+06	3037564	9620783
12065	Regions/clus7	32408	12786	0		372585	19461020	4488356	3102859	9273653
12066	Regions/clus7	32488	12786	0		357934	21572828	4615532	3.39471e+06	11083534
12067	Regions/clus7	32568	12786	0		403056	22231176	4.80924e+06	3.25629e+06	10418073
12068	Regions/clus7	32648	12786	0		507650	23969264	5.01571e+06	3131057	12004548
12069	Regions/clus7	32728	12786	0		557575	25587870	4.97906e+06	2.97353e+06	11543079
12070	Regions/clus7	32808	12786	0		421217	27795834	5112733	3.10778e+06	11800505
12071	Regions/clus7	32888	12786	0		430399	24151126	4.85009e+06	3.4784e+06	11597641
12073	Regions/clus7	33048	12786	0		576243	36182440	5.17911e+06	3536302	13064137
12074	Regions/clus7	33128	12786	0		223186	19434816	1.86243e+06	1.31822e+06	5418332
12075	Regions/clus7	33208	12786	0		499134	30754328	4.05779e+06	3.17138e+06	11096350
12076	Regions/clus7	33288	12786	0		540792	34543252	4.10125e+06	3.18291e+06	10805987
12078	Regions/clus7	33448	12786	0		251882	27413188	3.46297e+06	2.57526e+06	8345584
12087	Regions/clus7	25048	12706	0		290542	24290254	3.94266e+06	2.62429e+06	8518206
12088	Regions/clus7	25128	12706	0		424608	27495564	4217167	2930321	9044753
12089	Regions/clus7	25208	12706	0		540401	33404788	4.84138e+06	3018624	10515825
12090	Regions/clus7	25288	12706	0		642474	30029624	4.75851e+06	3.18778e+06	10294129
12091	Regions/clus7	25368	12706	0		585548	28516282	4.81128e+06	2.96508e+06	11524910
12092	Regions/clus7	25448	12706	0		483905	26662460	4.29646e+06	2937388	10399432
12093	Regions/clus7	25528	12706	0		655666	27835930	4414704	2.98475e+06	10818875
12094	Regions/clus7	25608	12706	0		594573	29594574	5.09768e+06	3.15127e+06	11314232
12095	Regions/clus7	25688	12706	0		520381	25388448	4.19282e+06	3.14014e+06	10279317
12096	Regions/clus7	25768	12706	0		394336	24794928	4.72264e+06	3.60588e+06	10945579
12097	Regions/clus7	25848	12706	0		527746	25581266	4769487	3.9125e+06	11715379
12098	Regions/clus7	25928	12706	0		469270	23866178	4.42553e+06	3216891	9562917
12099	Regions/clus7	26008	12706	0		302599	23322006	4.11819e+06	3.3214e+06	9182047
12100	Regions/clus7	26088	12706	0		504559	23607200	4.03695e+06	3.41165e+06	10757403
12101	Regions/clus7	26168	12706	0		567110	22924456	4.12368e+06	3.41078e+06	8623552
12102	Regions/clus7	26248	12706	0		681519	20353808	3.76271e+06	3.0831e+06	7.66286e+06
12103	Regions/clus7	26328	12706	0		535153	22851388	3569804	3.25364e+06	7.80848e+06
12104	Regions/clus7	26408	12706	0		533753	20323662	3.78441e+06	2.86531e+06	7.20254e+06
12105	Regions/clus7	26488	12706	0		695865	22653478	4.08224e+06	2595161	6462078
12106	Regions/clus7	26568	12706	0		998472	24629206	4288137	3202168	7.14215e+06
12109	Regions/clus7	26808	12706	0		913898	21871834	3.63274e+06	3.0337e+06	5.53258e+06
12112	Regions/clus7	27048	12706	0		764316	21271706	2.9794e+06	2.82074e+06	4.8887e+06
12134	Regions/clus7	28808	12706	0		1.23003e+06	20660528	3.62055e+06	2.76623e+06	6095936
12135	Regions/clus7	28888	12706	0		1.24182e+06	23911930	4.19296e+06	3486016	7.22291e+06
12136	Regions/clus7	28968	12706	0		1.19571e+06	26081510	3.88825e+06	3.23453e+06	7.62449e+06
12137	Regions/clus7	29048	12706	0		1.40512e+06	27800208	4677240	3.76328e+06	7.74089e+06
12138	Regions/clus7	29128	12706	0		1.13773e+06	26958294	4901518	3.72259e+06	8.05661e+06
12139	Regions/clus7	29208	12706	0		1643520	30205912	4990575	3.93709e+06	9116548
12140	Regions/clus7	29288	12706	0		1.07651e+06	24719880	3.83286e+06	2960889	6.99348e+06
12141	Regions/clus7	29368	12706	0		1.21368e+06	25156440	5064609	3722676	7.91856e+06
12142	Regions/clus7	29448	12706	0		1.5803e+06	28451834	4.83044e+06	3.96386e+06	8.21648e+06
12143	Regions/clus7	29528	12706	0		1.21596e+06	24876740	4.10493e+06	3.40751e+06	7321817
12144	Regions/clus7	29608	12706	0		1.12051e+06	20313132	3.65632e+06	3.02616e+06	5804595
12145	Regions/clus7	29688	12706	0		1411839	24575220	3846668	3.27404e+06	6.1407e+06
12146	Regions/clus7	29768	12706	0		1202771	20451630	3.5133e+06	2.57173e+06	5716154
12147	Regions/clus7	29848	12706	0		993122	17600754	2.92741e+06	2.50158e+06	5.02593e+06
12148	Regions/clus7	29928	12706	0		1.07565e+06	17060008	3.40612e+06	2.49211e+06	4.60714e+06
12150	Regions/clus7	30088	12706	0		1.42101e+06	20443974	3172455	2.94872e+06	5.15615e+06
12166	Regions/clus7	31368	12706	0		1.59926e+06	18680230	3850776	2.40134e+06	5197233
12167	Regions/clus7	31448	12706	0		1.40773e+06	19491014	3.81426e+06	2508994	6.00775e+06
12168	Regions/clus7	31528	12706	0		1.16278e+06	17902616	3.68171e+06	2752847	5017155
12169	Regions/clus7	31608	12706	0		748179	18300684	4.0113e+06	2.63646e+06	5.95533e+06
12170	Regions/clus7	31688	12706	0		774766	18664378	3.61545e+06	2.45847e+06	6021472
12172	Regions/clus7	31848	12706	0		950129	23219838	4.53858e+06	3.06167e+06	7402411
12173	Regions/clus7	31928	12706	0		986789	25391972	4.9183e+06	3385241	8494390
12174	Regions/clus7	32008	12706	0		773091	23175014	4.05884e+06	2.95625e+06	7986989
12175	Regions/clus7	32088	12706	0		835706	23075406	4.00475e+06	2608488	7464917
12176	Regions/clus7	32168	12706	0		889748	25593954	4.39594e+06	3.09949e+06	9465794
12177	Regions/clus7	32248	12706	0		494816	20206908	4092058	2.80458e+06	8197243
12178	Regions/clus7	32328	12706	0		473469	21354254	4498269	3163794	9723473
12179	Regions/clus7	32408	12706	0		486173	22856284	5001547	3.62005e+06	11001037
12180	Regions/clus7	32488	12706	0		544061	24512002	4824724	3864551	12243885
12181	Regions/clus7	32568	12706	0		350960	24789472	4.97703e+06	3.29092e+06	12082807
12182	Regions/clus7	32648	12706	0		462470	24822496	4698209	3.2467e+06	11244346
12183	Regions/clus7	32728	12706	0		475061	26334846	5284632	3.44711e+06	11607657
12184	Regions/clus7	32808	12706	0		400309	25947392	5.12711e+06	3641801	11830162
12185	Regions/clus7	32888	12706	0		445859	24988380	4.37942e+06	3.25079e+06	10343559
12187	Regions/clus7	33048	12706	0		533004	37523312	5315968	3.54503e+06	13081206
12188	Regions/clus7	33128	12706	0		453680	35486496	4.72105e+06	3.2112e+06	11538219
12189	Regions/clus7	33208	12706	0		474908	34613260	4230304	3421213	11869966
12190	Regions/clus7	33288	12706	0		593579	31163500	4.06274e+06	2.98129e+06	9653516
12200	Regions/clus7	24968	12626	0		266160	30259414	4.00537e+06	2.52643e+06	8026448
12201	Regions/clus7	25048	12626	0		520786	31266730	4.10938e+06	2.61804e+06	9439892
12203	Regions/clus7	25208	12626	0		413835	27812668	4.38274e+06	2.77021e+06	9527853
12204	Regions/clus7	25288	12626	0		724697	38001364	5025691	2.87463e+06	11984155
12205	Regions/clus7	25368	12626	0		563128	33194370	4.5396e+06	3.19508e+06	11313166
12206	Regions/clus7	25448	12626	0		550059	26832188	4.32942e+06	2.76429e+06	10691511
12207	Regions/clus7	25528	12626	0		623220	26131514	4.32498e+06	2.88336e+06	10212857
12208	Regions/clus7	25608	12626	0		653339	24793516	4693374	3.6049e+06	11410228
12209	Regions/clus7	25688	12626	0		438102	28469324	5135087	3.88513e+06	12753294
12210	Regions/clus7	25768	12626	0		518202	25881532	4.74402e+06	3.53269e+06	11174226
12211	Regions/clus7	25848	12626	0		501658	25447794	4926271	3.94487e+06	10940959
12212	Regions/clus7	25928	12626	0		424444	21385540	4549043	3.14121e+06	10708844
12213	Regions/clus7	26008	12626	0		451375	23285254	4922837	3276632	10668256
12214	Regions/clus7	26088	12626	0		433782	18589480	3.91912e+06	3.30006e+06	8.3593e+06
12215	Regions/clus7	26168	12626	0		565856	23504056	4.37088e+06	2.9564e+06	9692419
12216	Regions/clus7	26248	12626	0		747376	23531720	4721332	3307065	9149282
12217	Regions/clus7	26328	12626	0		646472	21426832	4.16342e+06	3075598	8.07873e+06
12218	Regions/clus7	26408	12626	0		758828	23440046	4.43594e+06	3.66232e+06	8300096
12219	Regions/clus7	26488	12626	0		724290	22656786	4322099	3.38361e+06	7.74713e+06
12220	Regions/clus7	26568	12626	0		1.20441e+06	26366802	4.37614e+06	3.34896e+06	7.61965e+06
12221	Regions/clus7	26648	12626	0		886152	24538408	3956961	2.97205e+06	6.4589e+06
12222	Regions/clus7	26728	12626	0		1.03058e+06	23713084	4146247	3.00404e+06	6062806
12225	Regions/clus7	26968	12626	0		1.2023e+06	21964082	3.64003e+06	2.6177e+06	5329593
12226	Regions/clus7	27048	12626	0		872479	23443806	3.42136e+06	2.73046e+06	5.03104e+06
12246	Regions/clus7	28648	12626	0		1.20698e+06	26365552	4.37922e+06	3679601	6828695
12247	Regions/clus7	28728	12626	0		823871	21039688	3.29904e+06	3025261	5.90901e+06
12248	Regions/clus7	28808	12626	0		1.12758e+06	22125408	3.73134e+06	2.95661e+06	6.26259e+06
12249	Regions/clus7	28888	12626	0		1.23962e+06	24727600	4.06466e+06	2.88794e+06	6539283
12250	Regions/clus7	28968	12626	0		1.372e+06	25986000	4.16318e+06	3.30651e+06	7.25899e+06
12251	Regions/clus7	29048	12626	0		1.17188e+06	26398708	4358790	3.89581e+06	7510197
12252	Regions/clus7	29128	12626	0		1.34449e+06	27728270	4.64745e+06	3.80221e+06	7241982
12253	Regions/clus7	29208	12626	0		1.41986e+06	26025496	3.9908e+06	3706910	7503260
12254	Regions/clus7	29288	12626	0		1.0603e+06	22242920	3.79523e+06	3.19601e+06	6293461
12255	Regions/clus7	29368	12626	0		1.44379e+06	24822642	4.16865e+06	3699046	6.73148e+06
12256	Regions/clus7	29448	12626	0		1.40408e+06	26598936	3.97017e+06	3.72339e+06	7112218
12257	Regions/clus7	29528	12626	0		1.47227e+06	24501884	4.43027e+06	3.4413e+06	6740203
12258	Regions/clus7	29608	12626	0		1070732	18423102	3410422	3.16969e+06	5224187
12259	Regions/clus7	29688	12626	0		1.35384e+06	20058052	3.3136e+06	2.52899e+06	5595708
12260	Regions/clus7	29768	12626	0		1068247	19102408	3.64854e+06	3090598	5.59255e+06
12261	Regions/clus7	29848	12626	0		1.41375e+06	21529858	3.58472e+06	2.99713e+06	5.67397e+06
12262	Regions/clus7	29928	12626	0		1.45412e+06	19682040	3.82959e+06	2742516	5197433
12280	Regions/clus7	31368	12626	0		1.85621e+06	21141182	4.14886e+06	3202571	6.45649e+06
12282	Regions/clus7	31528	12626	0		1.16305e+06	20514962	4.08498e+06	2.98068e+06	6801459
12283	Regions/clus7	31608	12626	0		1.12887e+06	20011678	3850308	2.80426e+06	6.82863e+06
12284	Regions/clus7	31688	12626	0		598282	16289804	3.61434e+06	2.45939e+06	6112903
12286	Regions/clus7	31848	12626	0		1.13398e+06	20766294	3.64012e+06	3105327	7817359
12287	Regions/clus7	31928	12626	0		847857	20995274	4551439	2.60679e+06	7559112
12288	Regions/clus7	32008	12626	0		1.09582e+06	24238092	4.60019e+06	2.83367e+06	8665087
12289	Regions/clus7	32088	12626	0		861768	25333614	4.13094e+06	3.20481e+06	8456929
12290	Regions/clus7	32168	12626	0		900403	22866830	4226143	2.92019e+06	8512304
12291	Regions/clus7	32248	12626	0		755942	21162784	4.4513e+06	2.85505e+06	8899584
12292	Regions/clus7	32328	12626	0		498744	21359072	4342954	3.01808e+06	10071876
12293	Regions/clus7	32408	12626	0		602912	23096468	4253702	3.48371e+06	10646637
12294	Regions/clus7	32488	12626	0		454209	25303716	4.93632e+06	3.35479e+06	11194635
12295	Regions/clus7	32568	12626	0		463987	25521106	4425591	3.27121e+06	11165026
12296	Regions/clus7	32648	12626	0		659190	31307550	5.40908e+06	4039662	11963760
12297	Regions/clus7	32728	12626	0		511824	31053338	5.15405e+06	3.63916e+06	12588544
12298	Regions/clus7	32808	12626	0		557666	33834808	5184867	3551341	12946697
12300	Regions/clus7	32968	12626	0		532312	33357302	5014702	3.23049e+06	12909171
12301	Regions/clus7	33048	12626	0		628511	36219532	4.91501e+06	3.30257e+06	11444543
12302	Regions/clus7	33128	12626	0		467621	32938778	4.3561e+06	3.25408e+06	11257432
12303	Regions/clus7	33208	12626	0		337914	31534020	4.07562e+06	2.97156e+06	10203491
12304	Regions/clus7	33288	12626	0		389794	27413564	3930507	2.84279e+06	9500778
12310	Regions/clus7	24728	12546	0		91874.6	5.18868e+06	800280	511201	1563366
12313	Regions/clus7	24968	12546	0		361194	26933406	3.12896e+06	2.21108e+06	7581944
12314	Regions/clus7	25048	12546	0		380165	35997000	4.12799e+06	2811728	10261314
12316	Regions/clus7	25208	12546	0		581591	37146600	4.69966e+06	3.33234e+06	11630560
12317	Regions/clus7	25288	12546	0		671201	39668752	5.45287e+06	3502505	13296112
12318	Regions/clus7	25368	12546	0		619422	38482556	5.17551e+06	3.55312e+06	12336104
12319	Regions/clus7	25448	12546	0		587116	29373670	5.15063e+06	3.0073e+06	11338602
12320	Regions/clus7	25528	12546	0		461193	24961988	3722396	2.65088e+06	9810884
12321	Regions/clus7	25608	12546	0		507443	22824338	4450090	3.27452e+06	10276782
12322	Regions/clus7	25688	12546	0		525800	26764166	4909938	3.5491e+06	12218049
12323	Regions/clus7	25768	12546	0		543285	26478100	4.7567e+06	3.45221e+06	11195549
12324	Regions/clus7	25848	12546	0		379656	23964922	4827109	3.19926e+06	10212248
12325	Regions/clus7	25928	12546	0		543365	24432120	4471686	3.41185e+06	10880817
12326	Regions/clus7	26008	12546	0		383011	20330898	3980541	2816386	9112329
12327	Regions/clus7	26088	12546	0		369267	19488028	4008339	2821897	7899217
12328	Regions/clus7	26168	12546	0		702665	22230638	4.4864e+06	3.50935e+06	9340940
12329	Regions/clus7	26248	12546	0		592916	20447974	4.28798e+06	2.96296e+06	7.77448e+06
12330	Regions/clus7	26328	12546	0		761910	23558952	4488632	3.27865e+06	7.76381e+06
12331	Regions/clus7	26408	12546	0		893963	24871230	4.3147e+06	3.44007e+06	7.88442e+06
12332	Regions/clus7	26488	12546	0		746404	24848710	4470380	3.22326e+06	7.18421e+06
12333	Regions/clus7	26568	12546	0		920759	25280720	4961572	3.06031e+06	7.19071e+06
12334	Regions/clus7	26648	12546	0		1.11107e+06	28876766	4027231	3.21245e+06	7506742
12335	Regions/clus7	26728	12546	0		1.09043e+06	26063004	4.03897e+06	3343049	6.08803e+06
12336	Regions/clus7	26808	12546	0		1.45173e+06	28064326	4591052	3362869	6.69286e+06
12338	Regions/clus7	26968	12546	0		1.11065e+06	25516228	4.0533e+06	3.39377e+06	5868238
12339	Regions/clus7	27048	12546	0		1.02778e+06	22948906	3.65445e+06	2.99138e+06	5.29064e+06
12341	Regions/clus7	27208	12546	0		1.23708e+06	21461834	3.20751e+06	2.80061e+06	4.76611e+06
12358	Regions/clus7	28568	12546	0		5.02524e+06	59560144	5.57948e+06	5218077	9172263
12359	Regions/clus7	28648	12546	0		2.36014e+06	46798340	6.84047e+06	5890437	10571142
12360	Regions/clus7	28728	12546	0		1330660	30873798	4659284	4101540	7886797
12361	Regions/clus7	28808	12546	0		1.38141e+06	27279474	4.82486e+06	4012300	7.63592e+06
12362	Regions/clus7	28888	12546	0		1.16942e+06	23647932	4064255	3.89104e+06	7352670
12363	Regions/clus7	28968	12546	0		1573248	27099726	4.60051e+06	3.48007e+06	6949705
12364	Regions/clus7	29048	12546	0		1187971	24600842	3.71985e+06	3.22376e+06	6043391
12365	Regions/clus7	29128	12546	0		1.51178e+06	22611034	4445417	3.3844e+06	6745812
12366	Regions/clus7	29208	12546	0		1.21162e+06	23633362	4.11068e+06	3.08478e+06	6.20251e+06
12367	Regions/clus7	29288	12546	0		1.11174e+06	23374194	4328564	3.6623e+06	6.27989e+06
12368	Regions/clus7	29368	12546	0		2.10546e+06	43981900	6443848	4.60893e+06	11054695
12369	Regions/clus7	29448	12546	0		1.56422e+06	26481396	4445822	3.03838e+06	6985096
12370	Regions/clus7	29528	12546	0		1.67286e+06	25026548	4441147	3.44154e+06	6865795
12371	Regions/clus7	29608	12546	0		1.2953e+06	18786500	3.09428e+06	3.02129e+06	5.31577e+06
12372	Regions/clus7	29688	12546	0		1.21926e+06	21254256	3.75795e+06	3.11664e+06	5.64688e+06
12373	Regions/clus7	29768	12546	0		1.8135e+06	25138504	3692782	3.48712e+06	6.08793e+06
12374	Regions/clus7	29848	12546	0		2.01762e+06	25264948	3.4651e+06	3.33829e+06	6.10053e+06
12375	Regions/clus7	29928	12546	0		1.36545e+06	21257300	3.63001e+06	2.97176e+06	5685115
12377	Regions/clus7	30088	12546	0		1.31296e+06	18016508	3.66733e+06	2.87348e+06	5070122
12393	Regions/clus7	31368	12546	0		2.03097e+06	19948338	4.14776e+06	2.96119e+06	6.16191e+06
12394	Regions/clus7	31448	12546	0		1.68523e+06	23500166	4603842	3.26643e+06	7.44312e+06
12395	Regions/clus7	31528	12546	0		1.58016e+06	25615378	4734209	3.37846e+06	7275000
12396	Regions/clus7	31608	12546	0		1.1216e+06	24695090	4.38534e+06	3.25056e+06	8.19141e+06
12397	Regions/clus7	31688	12546	0		910736	20002942	4583898	2.63245e+06	6688162
12398	Regions/clus7	31768	12546	0		974607	21987492	4533969	2.89109e+06	7314795
12399	Regions/clus7	31848	12546	0		990966	21738686	4276102	3.09471e+06	7.84354e+06
12400	Regions/clus7	31928	12546	0		933275	24072960	4234976	3.08706e+06	8463614
12401	Regions/clus7	32008	12546	0		897506	25440038	4.12598e+06	3413332	9426155
12402	Regions/clus7	32088	12546	0		1.00625e+06	24387250	4.10511e+06	3054477	8889487
12403	Regions/clus7	32168	12546	0		708833	20103880	4.04763e+06	2823802	7.82304e+06
12404	Regions/clus7	32248	12546	0		532430	20596466	4.33341e+06	2948310	8503003
12405	Regions/clus7	32328	12546	0		686041	23478348	4516331	3274124	10820943
12406	Regions/clus7	32408	12546	0		607317	23929054	4081254	2.97859e+06	10324860
12407	Regions/clus7	32488	12546	0		637458	29714674	5.10404e+06	3.46398e+06	11199904
12408	Regions/clus7	32568	12546	0		591583	32495754	5216384	3.79418e+06	12499166
12409	Regions/clus7	32648	12546	0		655237	36093392	5707807	3738664	13791856
12410	Regions/clus7	32728	12546	0		731860	37956164	5.57178e+06	3528728	12774112
12411	Regions/clus7	32808	12546	0		730797	37756024	5733573	3.80905e+06	13083384
12412	Regions/clus7	32888	12546	0		808471	45265732	5716548	4.31472e+06	15031400
12413	Regions/clus7	32968	12546	0		614541	37972792	5138555	3.59107e+06	12732742
12414	Regions/clus7	33048	12546	0		506453	35921380	4590832	3.67977e+06	12024699
12415	Regions/clus7	33128	12546	0		484432	37760636	4287473	3.3993e+06	11889286
12416	Regions/clus7	33208	12546	0		369082	32587858	4.24948e+06	3.10539e+06	10499660
12427	Regions/clus7	25128	12466	0		475038	35381672	5.00127e+06	3388983	10462669
12429	Regions/clus7	25288	12466	0		473651	34941912	5357016	3305657	11243089
12430	Regions/clus7	25368	12466	0		614786	36305852	5243343	3.24901e+06	12099645
12431	Regions/clus7	25448	12466	0		570603	34794900	5.42867e+06	3.05551e+06	12442953
12432	Regions/clus7	25528	12466	0		407959	27046024	4341445	3.01548e+06	10718459
12433	Regions/clus7	25608	12466	0		431077	24056888	4.4709e+06	2.95774e+06	9906881
12434	Regions/clus7	25688	12466	0		549422	24934666	4.55526e+06	3.11136e+06	10507453
12435	Regions/clus7	25768	12466	0		478434	26880748	4.77644e+06	3.42923e+06	11123770
12436	Regions/clus7	25848	12466	0		382953	23376754	4.33748e+06	2.99222e+06	9525716
12437	Regions/clus7	25928	12466	0		456505	22101820	4.29104e+06	3.0119e+06	9354612
12438	Regions/clus7	26008	12466	0		489683	25158874	4533887	3.77147e+06	10145816
12439	Regions/clus7	26088	12466	0		465184	21403628	4.11159e+06	3155387	8502564
12440	Regions/clus7	26168	12466	0		517130	21154738	4268027	3.43183e+06	8371712
12441	Regions/clus7	26248	12466	0		607555	24481986	4425529	3.28788e+06	9323108
12442	Regions/clus7	26328	12466	0		837053	23868670	4524650	3.52359e+06	8502262
12443	Regions/clus7	26408	12466	0		869011	24042950	3.93131e+06	3.38803e+06	7296437
12444	Regions/clus7	26488	12466	0		1.08601e+06	25434510	4.68838e+06	3.46473e+06	7.64281e+06
12445	Regions/clus7	26568	12466	0		1.00512e+06	24015082	4.59229e+06	3419242	6.59588e+06
12446	Regions/clus7	26648	12466	0		1.06965e+06	24818752	4.31688e+06	3.38261e+06	6.47213e+06
12447	Regions/clus7	26728	12466	0		1262891	25924386	4.08226e+06	3.20275e+06	6269738
12448	Regions/clus7	26808	12466	0		1.07745e+06	24758156	4.06289e+06	3.24315e+06	6.04935e+06
12449	Regions/clus7	26888	12466	0		1.21704e+06	23047992	4223524	3.2813e+06	6797956
12450	Regions/clus7	26968	12466	0		1.11964e+06	21467964	3.65281e+06	2.96496e+06	5.28656e+06
12452	Regions/clus7	27128	12466	0		1.24697e+06	20998398	3294173	3.07036e+06	4618060
12471	Regions/clus7	28648	12466	0		2.04549e+06	39370944	6107115	4.91714e+06	8889468
12472	Regions/clus7	28728	12466	0		1.66246e+06	32835970	5.40003e+06	4135168	8238999
12473	Regions/clus7	28808	12466	0		1.34404e+06	27872252	4.43486e+06	3.6733e+06	7.64161e+06
12474	Regions/clus7	28888	12466	0		1502287	26806550	4.63651e+06	3.93299e+06	7.16309e+06
12475	Regions/clus7	28968	12466	0		1.54924e+06	25984120	4387204	3.3401e+06	7.3639e+06
12476	Regions/clus7	29048	12466	0		1563059	26375798	4247822	3423027	6.58244e+06
12477	Regions/clus7	29128	12466	0		1094130	22778630	4.23885e+06	3.3955e+06	6489788
12478	Regions/clus7	29208	12466	0		1.54732e+06	24391420	4636412	3188430	7.04755e+06
12479	Regions/clus7	29288	12466	0		1.5105e+06	24910604	4430958	3.65477e+06	6.26621e+06
12480	Regions/clus7	29368	12466	0		1.97728e+06	39414096	5.66104e+06	4.57303e+06	9374845
12481	Regions/clus7	29448	12466	0		2.09513e+06	27872430	5.01489e+06	3.50293e+06	7.10775e+06
12482	Regions/clus7	29528	12466	0		2.04584e+06	29086204	5066168	3.38329e+06	7314826
12483	Regions/clus7	29608	12466	0		1.52851e+06	21559344	3.8438e+06	3.25582e+06	5.91369e+06
12484	Regions/clus7	29688	12466	0		1.45423e+06	21144722	3.94481e+06	2.97341e+06	5380826
12485	Regions/clus7	29768	12466	0		1.12352e+06	18793834	3.82287e+06	3.11952e+06	5.32714e+06
12486	Regions/clus7	29848	12466	0		966245	16674176	2.81067e+06	2.72256e+06	4251360
12487	Regions/clus7	29928	12466	0		1.44444e+06	19673970	3.74101e+06	2.63064e+06	5.65158e+06
12488	Regions/clus7	30008	12466	0		1.32403e+06	16231486	3.63684e+06	2.58282e+06	4.42666e+06
12506	Regions/clus7	31448	12466	0		1.81034e+06	22425716	4.50016e+06	3000486	6.74701e+06
12507	Regions/clus7	31528	12466	0		1.34646e+06	23729270	4826913	3.38051e+06	7756136
12508	Regions/clus7	31608	12466	0		1.2234e+06	23996912	4816542	3.17754e+06	6885526
12509	Regions/clus7	31688	12466	0		1.12476e+06	23126508	4582917	3310855	7.77501e+06
12510	Regions/clus7	31768	12466	0		1328575	25033354	4.66653e+06	3.49805e+06	8749015
12511	Regions/clus7	31848	12466	0		1.05026e+06	25000436	4283247	3.14017e+06	9211863
12512	Regions/clus7	31928	12466	0		1.1474e+06	21912818	4.547e+06	3.19653e+06	8504522
12513	Regions/clus7	32008	12466	0		992643	26062544	4581008	3.3592e+06	10088487
12514	Regions/clus7	32088	12466	0		1.17477e+06	29251994	4.58567e+06	3195201	9245997
12515	Regions/clus7	32168	12466	0		773355	26113404	3.99041e+06	3.48582e+06	9294959
12516	Regions/clus7	32248	12466	0		946897	30789818	5333779	3.69594e+06	11795779
12517	Regions/clus7	32328	12466	0		846932	27292870	5386057	3.01513e+06	11245468
12518	Regions/clus7	32408	12466	0		385889	29596196	5113456	3747273	11946716
12519	Regions/clus7	32488	12466	0		753057	34308280	5623385	3.88736e+06	13655098
12520	Regions/clus7	32568	12466	0		685221	38366644	5740634	3699763	13233232
12521	Regions/clus7	32648	12466	0		584111	36738488	5727596	4001644	13163957
12522	Regions/clus7	32728	12466	0		645950	35888920	5291926	3821092	12991571
12523	Regions/clus7	32808	12466	0		590829	42704352	5820624	4.14254e+06	13281366
12524	Regions/clus7	32888	12466	0		565028	38023296	6058932	4.39293e+06	13402083
12525	Regions/clus7	32968	12466	0		543307	36710488	5.08433e+06	3.95458e+06	12175301
12526	Regions/clus7	33048	12466	0		483756	34023024	4.18195e+06	2.88258e+06	10354317
12527	Regions/clus7	33128	12466	0		499013	30267384	3.47254e+06	3.08071e+06	9901010
12528	Regions/clus7	33208	12466	0		449207	28062508	3447932	2.94579e+06	8618048
12529	Regions/clus7	33288	12466	0		347284	23306646	2896190	2.17266e+06	7112166
12540	Regions/clus7	25288	12386	0		498058	35198392	5045617	3294589	11667264
12541	Regions/clus7	25368	12386	0		578959	36700256	5.10245e+06	3.35266e+06	11679431
12542	Regions/clus7	25448	12386	0		486538	32151980	5288549	3.20667e+06	12262885
12543	Regions/clus7	25528	12386	0		508686	29941510	4.91804e+06	3.20667e+06	10992303
12544	Regions/clus7	25608	12386	0		507701	27842814	4.6708e+06	3321160	10946051
12545	Regions/clus7	25688	12386	0		477918	25997080	4.74775e+06	2.81764e+06	10629957
12546	Regions/clus7	25768	12386	0		436568	25373916	4639010	3.71796e+06	10792786
12547	Regions/clus7	25848	12386	0		550454	23179916	4.30497e+06	3.07708e+06	9394713
12548	Regions/clus7	25928	12386	0		545720	22665196	4.16547e+06	3176450	8650875
12549	Regions/clus7	26008	12386	0		524438	24114098	4.21495e+06	3.20414e+06	9311656
12550	Regions/clus7	26088	12386	0		688015	26549842	4.67248e+06	3.77493e+06	11124813
12551	Regions/clus7	26168	12386	0		525010	24195068	4489097	3.65368e+06	10463192
12552	Regions/clus7	26248	12386	0		752831	25395766	5.5087e+06	3.48e+06	9790458
12553	Regions/clus7	26328	12386	0		901726	28994364	5218355	3988857	10302847
12554	Regions/clus7	26408	12386	0		1.08745e+06	27520372	4.55475e+06	3457091	8558539
12555	Regions/clus7	26488	12386	0		1238031	28678904	5.06636e+06	3.70604e+06	8623473
12556	Regions/clus7	26568	12386	0		1.40917e+06	26678436	4.40131e+06	3.67726e+06	7574007
12557	Regions/clus7	26648	12386	0		1097830	27758840	4326511	3353250	8061659
12558	Regions/clus7	26728	12386	0		885404	23138996	4106135	3.39447e+06	7.08563e+06
12559	Regions/clus7	26808	12386	0		1.10836e+06	22615218	3.70289e+06	3.19938e+06	5.54624e+06
12560	Regions/clus7	26888	12386	0		1.43685e+06	22331382	3.55768e+06	3273571	5.95484e+06
12561	Regions/clus7	26968	12386	0		1.4145e+06	22510006	3882820	3.23822e+06	5791775
12562	Regions/clus7	27048	12386	0		1.41409e+06	22109720	3406539	2994202	5309543
12563	Regions/clus7	27128	12386	0		1.36553e+06	20485434	3210195	3115872	5.3348e+06
12565	Regions/clus7	27288	12386	0		1.29062e+06	16551852	2.74473e+06	2927081	4571872
12566	Regions/clus7	27368	12386	0		1.52538e+06	15620978	2.48987e+06	2.41277e+06	4129938
12583	Regions/clus7	28728	12386	0		1.559e+06	28146666	4.87623e+06	4.08509e+06	8.06472e+06
12584	Regions/clus7	28808	12386	0		1.4566e+06	27368376	4827006	4.29392e+06	7229944
12585	Regions/clus7	28888	12386	0		1.6142e+06	27743534	5.16308e+06	3.98662e+06	7914042
12586	Regions/clus7	28968	12386	0		1.39195e+06	23345318	4748738	3.74816e+06	6587696
12587	Regions/clus7	29048	12386	0		1.29372e+06	24452608	4.50614e+06	3333873	6.73205e+06
12588	Regions/clus7	29128	12386	0		1.70409e+06	25972394	4.55717e+06	3.18237e+06	6718301
12589	Regions/clus7	29208	12386	0		1.44312e+06	22860752	4.54598e+06	3.35172e+06	6.61284e+06
12590	Regions/clus7	29288	12386	0		1.44823e+06	22464468	4.29109e+06	3.20337e+06	6333952
12591	Regions/clus7	29368	12386	0		1.39697e+06	25445052	4.96015e+06	3453102	7.52103e+06
12592	Regions/clus7	29448	12386	0		1.69853e+06	22382588	4.05506e+06	3123325	6339855
12593	Regions/clus7	29528	12386	0		1.82373e+06	25055992	4.56131e+06	3.2689e+06	7.49444e+06
12594	Regions/clus7	29608	12386	0		1.64571e+06	23784032	3.54368e+06	3.13183e+06	6431841
12595	Regions/clus7	29688	12386	0		1.71982e+06	24177520	4182317	3012051	6151773
12596	Regions/clus7	29768	12386	0		1.68964e+06	18822760	3.60329e+06	3.06257e+06	5.54357e+06
12597	Regions/clus7	29848	12386	0		874445	14287118	2643310	2.6248e+06	4.39429e+06
12616	Regions/clus7	31368	12386	0		2.51233e+06	25440528	4681621	2.83914e+06	7625173
12617	Regions/clus7	31448	12386	0		2.30758e+06	28417284	5.1697e+06	3.36807e+06	8439594
12618	Regions/clus7	31528	12386	0		1.75559e+06	31887374	5324550	3.67693e+06	9453237
12619	Regions/clus7	31608	12386	0		1.6922e+06	30994500	5.2944e+06	3766193	10027625
12620	Regions/clus7	31688	12386	0		1.34295e+06	32199988	5846108	4.10828e+06	10133569
12621	Regions/clus7	31768	12386	0		1207592	29722850	5996872	3.82057e+06	10672983
12622	Regions/clus7	31848	12386	0		1.08485e+06	30573362	5.19244e+06	3553471	9383282
12623	Regions/clus7	31928	12386	0		1.08535e+06	28750440	5.70979e+06	3.54105e+06	10215926
12624	Regions/clus7	32008	12386	0		1.35305e+06	32691250	5.48543e+06	3565040	11289092
12625	Regions/clus7	32088	12386	0		1.05426e+06	33653684	5542918	3.87912e+06	11753011
12626	Regions/clus7	32168	12386	0		897685	32250320	4.93489e+06	3.5178e+06	11205968
12627	Regions/clus7	32248	12386	0		838211	35411396	5.89247e+06	3.87884e+06	12508839
12628	Regions/clus7	32328	12386	0		798874	34816512	5.51332e+06	3597725	12027696
12629	Regions/clus7	32408	12386	0		798945	33330474	5603536	3.61952e+06	12977529
12630	Regions/clus7	32488	12386	0		721800	40799160	6.06822e+06	3.63419e+06	13890620
12631	Regions/clus7	32568	12386	0		574014	37748236	5.6204e+06	3.54052e+06	13477708
12632	Regions/clus7	32648	12386	0		626478	40301764	6.08701e+06	4.37175e+06	14088340
12633	Regions/clus7	32728	12386	0		660579	37712640	5768327	3.7428e+06	12673851
12634	Regions/clus7	32808	12386	0		701950	43379048	5749080	3.96806e+06	14292090
12635	Regions/clus7	32888	12386	0		466607	36567476	4868983	3.52015e+06	11620129
12636	Regions/clus7	32968	12386	0		436854	35077908	4495674	3.50615e+06	11143291
12637	Regions/clus7	33048	12386	0		613911	37436208	4111070	3080005	10405356
12651	Regions/clus7	25368	12306	0		494389	33699764	4.86914e+06	3.24087e+06	11642125
12652	Regions/clus7	25448	12306	0		521019	34603476	4.921e+06	3.25666e+06	11995139
12653	Regions/clus7	25528	12306	0		544328	32156286	4.77571e+06	3.23408e+06	11107270
12654	Regions/clus7	25608	12306	0		693649	32063542	5.23517e+06	3361352	11888478
12655	Regions/clus7	25688	12306	0		572121	31862218	5.13953e+06	3.729e+06	10759446
12656	Regions/clus7	25768	12306	0		581871	27979588	4.59241e+06	3151964	10542591
12657	Regions/clus7	25848	12306	0		707810	25492836	4.7947e+06	3245734	10045089
12658	Regions/clus7	25928	12306	0		618005	24413222	4270453	3093780	9066700
12659	Regions/clus7	26008	12306	0		709348	25862792	5017350	3.69857e+06	9077589
12660	Regions/clus7	26088	12306	0		464740	24556588	4.90218e+06	3.19967e+06	9848742
12661	Regions/clus7	26168	12306	0		877099	25940166	4.82997e+06	3376046	9802522
12662	Regions/clus7	26248	12306	0		784322	25836216	4.97958e+06	3.4277e+06	9075936
12663	Regions/clus7	26328	12306	0		979242	25921122	4.87767e+06	3.56511e+06	8436193
12664	Regions/clus7	26408	12306	0		1029568	24654856	4356565	2.98385e+06	7.22578e+06
12665	Regions/clus7	26488	12306	0		1.37565e+06	28564534	5.00596e+06	3.5899e+06	8.36486e+06
12666	Regions/clus7	26568	12306	0		911814	23107822	4549568	2.92452e+06	6.82406e+06
12667	Regions/clus7	26648	12306	0		1.47669e+06	23916880	4.57253e+06	3.36897e+06	7.20643e+06
12668	Regions/clus7	26728	12306	0		1.39521e+06	25027384	4.25459e+06	3575016	6672712
12669	Regions/clus7	26808	12306	0		2.00378e+06	27255656	4671250	3.36156e+06	7301439
12670	Regions/clus7	26888	12306	0		1.69951e+06	23379698	4.52947e+06	2.7323e+06	6033361
12671	Regions/clus7	26968	12306	0		2.01047e+06	27470678	4529736	3176788	6.55711e+06
12672	Regions/clus7	27048	12306	0		2.2977e+06	26393124	3.3591e+06	3105047	5826238
12673	Regions/clus7	27128	12306	0		2.09965e+06	21477868	3.22869e+06	2.78346e+06	5453685
12675	Regions/clus7	27288	12306	0		1.99862e+06	17990210	2.71995e+06	2.51827e+06	4678182
12695	Regions/clus7	28888	12306	0		1498241	28769516	4645923	3.91787e+06	7566767
12696	Regions/clus7	28968	12306	0		1.59502e+06	25670648	4743743	3.48157e+06	7108583
12697	Regions/clus7	29048	12306	0		1.76156e+06	25977624	4.43274e+06	3.85872e+06	7160244
12698	Regions/clus7	29128	12306	0		1.65357e+06	28904242	5188844	3.65154e+06	7.34404e+06
12699	Regions/clus7	29208	12306	0		1.48518e+06	22796618	3.91108e+06	3.30671e+06	6002425
12700	Regions/clus7	29288	12306	0		1.92308e+06	22486884	4038127	2.74591e+06	6.12666e+06
12701	Regions/clus7	29368	12306	0		1.29354e+06	19078496	3.52384e+06	2717978	5.25066e+06
12702	Regions/clus7	29448	12306	0		1.48096e+06	21426822	3.87904e+06	2941087	5483964
12703	Regions/clus7	29528	12306	0		1.71132e+06	21758528	4.11989e+06	3.1744e+06	6.1432e+06
12704	Regions/clus7	29608	12306	0		1.53109e+06	18818320	3.91806e+06	2.87578e+06	5331476
12705	Regions/clus7	29688	12306	0		1.37006e+06	19478774	3.51866e+06	2.72314e+06	5616656
12706	Regions/clus7	29768	12306	0		1.61735e+06	18782528	3.69718e+06	2726607	5321368
12707	Regions/clus7	29848	12306	0		996457	13548804	2.40289e+06	1.95042e+06	4.18621e+06
12726	Regions/clus7	31368	12306	0		1992052	28507174	5.12929e+06	3.3769e+06	8933138
12727	Regions/clus7	31448	12306	0		1.66551e+06	26522584	5743984	3.40152e+06	8719524
12728	Regions/clus7	31528	12306	0		1.78172e+06	35592204	6.11012e+06	4.0016e+06	10613246
12729	Regions/clus7	31608	12306	0		1.57655e+06	36973224	6.01888e+06	4.18899e+06	10259843
12730	Regions/clus7	31688	12306	0		1.20959e+06	35948604	6470198	4.39799e+06	11229747
12731	Regions/clus7	31768	12306	0		1.41076e+06	40498076	6332660	4.39112e+06	12411467
12732	Regions/clus7	31848	12306	0		1.19945e+06	43428128	6142923	4.83954e+06	12584407
12733	Regions/clus7	31928	12306	0		1.46648e+06	45379592	6480699	4.17195e+06	13310602
12734	Regions/clus7	32008	12306	0		1360025	41911552	6439023	4399242	13189053
12735	Regions/clus7	32088	12306	0		1.20355e+06	42360880	6.68782e+06	4.3513e+06	13018877
12736	Regions/clus7	32168	12306	0		1064646	40971032	6.76375e+06	4.1464e+06	13911339
12737	Regions/clus7	32248	12306	0		1.00217e+06	44579280	6.12407e+06	4357414	13702012
12738	Regions/clus7	32328	12306	0		1.0121e+06	45771024	6.24718e+06	4.14577e+06	14015509
12739	Regions/clus7	32408	12306	0		669458	42309220	5.85172e+06	4.46966e+06	13817595
12740	Regions/clus7	32488	12306	0		668319	42322408	5.46368e+06	4.20025e+06	13267246
12741	Regions/clus7	32568	12306	0		769711	41028104	5.85917e+06	4545270	13208337
12742	Regions/clus7	32648	12306	0		478824	40852164	5.69455e+06	3.81587e+06	13789305
12743	Regions/clus7	32728	12306	0		617441	35628028	5310873	3.92164e+06	12315531
12744	Regions/clus7	32808	12306	0		564979	36283368	5.73728e+06	3.68979e+06	12850663
12745	Regions/clus7	32888	12306	0		366817	35573312	5.17969e+06	3.40189e+06	11160303
12746	Regions/clus7	32968	12306	0		267869	33754996	4249824	3544899	10228300
12761	Regions/clus7	25448	12226	0		532014	35955672	5577568	3.74983e+06	11597764
12762	Regions/clus7	25528	12226	0		460979	32397852	5.19613e+06	3.27468e+06	11302872
12763	Regions/clus7	25608	12226	0		572257	32054912	5.40434e+06	3.23553e+06	11887315
12764	Regions/clus7	25688	12226	0		545178	32811856	5.19633e+06	3.62187e+06	11604367
12765	Regions/clus7	25768	12226	0		595928	29698970	5.01713e+06	3.51815e+06	10543495
12766	Regions/clus7	25848	12226	0		543466	29101078	4.65852e+06	3.52772e+06	10733461
12767	Regions/clus7	25928	12226	0		700235	25073682	4860938	3358342	10255205
12768	Regions/clus7	26008	12226	0		739306	30003252	5.14645e+06	3.44821e+06	11304259
12769	Regions/clus7	26088	12226	0		688135	28175728	5.49693e+06	3.92414e+06	10833546
12770	Regions/clus7	26168	12226	0		891422	32306330	5245306	3.99599e+06	10440485
12771	Regions/clus7	26248	12226	0		764229	26263030	4936435	3.77313e+06	8774249
12772	Regions/clus7	26328	12226	0		942301	29158184	5.12414e+06	3.92955e+06	9391996
12773	Regions/clus7	26408	12226	0		1.13701e+06	30351312	5.62728e+06	3925195	8911809
12774	Regions/clus7	26488	12226	0		1.43295e+06	30225320	4.73851e+06	3.73907e+06	9435498
12775	Regions/clus7	26568	12226	0		1.50822e+06	31421526	5103260	3.43665e+06	9261954
12776	Regions/clus7	26648	12226	0		1.90225e+06	30388560	5507567	3.72888e+06	8.21929e+06
12777	Regions/clus7	26728	12226	0		1.34124e+06	21188106	3.68018e+06	2.96697e+06	6879599
12778	Regions/clus7	26808	12226	0		1.8194e+06	24511992	4464203	3.42807e+06	7.10242e+06
12779	Regions/clus7	26888	12226	0		2150249	24811690	4.29613e+06	3.00831e+06	6534814
12780	Regions/clus7	26968	12226	0		2.44303e+06	24229102	4.12813e+06	3.27852e+06	6812641
12781	Regions/clus7	27048	12226	0		2.13129e+06	22582894	3.62708e+06	2.87232e+06	5.7608e+06
12782	Regions/clus7	27128	12226	0		2.14747e+06	22519022	3134689	2.83002e+06	5631778
12783	Regions/clus7	27208	12226	0		2.55559e+06	22145402	3.27883e+06	3.00369e+06	5564830
12803	Regions/clus7	28808	12226	0		1.66736e+06	25933316	4315818	3.2484e+06	6166121
12804	Regions/clus7	28888	12226	0		2.14219e+06	29366896	5.96329e+06	3470571	7.80701e+06
12805	Regions/clus7	28968	12226	0		1.71973e+06	27913220	5.22928e+06	3.58988e+06	7770383
12806	Regions/clus7	29048	12226	0		1.79838e+06	24410806	4.57742e+06	3.46137e+06	7.14224e+06
12807	Regions/clus7	29128	12226	0		1.77913e+06	24168894	4.27554e+06	3.02048e+06	6191530
12808	Regions/clus7	29208	12226	0		1.26898e+06	17430768	3068919	2.50555e+06	4823525
12809	Regions/clus7	29288	12226	0		1.40175e+06	18618874	3312136	2.32546e+06	5095771
12810	Regions/clus7	29368	12226	0		1678383	21113486	3.10855e+06	2.32452e+06	4.90195e+06
12811	Regions/clus7	29448	12226	0		1.74672e+06	19400172	3.11432e+06	2440073	4.84873e+06
12812	Regions/clus7	29528	12226	0		1.94407e+06	19684932	3.22087e+06	2.4137e+06	4.4683e+06
12813	Regions/clus7	29608	12226	0		1.6526e+06	20164516	3.16272e+06	2.64415e+06	4732098
12814	Regions/clus7	29688	12226	0		1.69072e+06	17616372	2.8705e+06	2.28014e+06	4420686
12815	Regions/clus7	29768	12226	0		1.47896e+06	16004420	2971535	2.40552e+06	4.40338e+06
12816	Regions/clus7	29848	12226	0		1.29396e+06	14099197	2.78254e+06	2.21777e+06	4344823
12835	Regions/clus7	31368	12226	0		2510685	32215382	5993453	3835614	10186083
12836	Regions/clus7	31448	12226	0		2.51084e+06	35946072	5300999	3.94671e+06	10241588
12837	Regions/clus7	31528	12226	0		1.59203e+06	37984872	6.37375e+06	3.92714e+06	11989336
12838	Regions/clus7	31608	12226	0		1.61731e+06	41386160	5.76802e+06	3.70915e+06	10990653
12839	Regions/clus7	31688	12226	0		1.40513e+06	37240424	5.8155e+06	3.56925e+06	11621624
12840	Regions/clus7	31768	12226	0		1.1444e+06	41059368	6348590	4.50952e+06	11569172
12841	Regions/clus7	31848	12226	0		1.21742e+06	41888992	6073363	4545749	13574661
12842	Regions/clus7	31928	12226	0		1.22017e+06	46273272	6712935	4591101	14473610
12843	Regions/clus7	32008	12226	0		1033981	48317656	6820026	4510000	14622883
12844	Regions/clus7	32088	12226	0		999330	43693908	6.57052e+06	4.19085e+06	14540833
12845	Regions/clus7	32168	12226	0		763034	40660940	5674921	3.93208e+06	12840546
12846	Regions/clus7	32248	12226	0		774135	45339944	6399634	4316060	15374117
12847	Regions/clus7	32328	12226	0		827742	44352884	5.76449e+06	3899195	14312399
12848	Regions/clus7	32408	12226	0		623687	44266792	5.59933e+06	4.17698e+06	13683332
12849	Regions/clus7	32488	12226	0		730445	50755688	6015014	4400550	15337861
12850	Regions/clus7	32568	12226	0		596019	43516756	6897564	4.7165e+06	14397156
12851	Regions/clus7	32648	12226	0		617464	41060168	5.85283e+06	3877531	13914380
12852	Regions/clus7	32728	12226	0		535938	38749164	4928786	4.10564e+06	13402549
12853	Regions/clus7	32808	12226	0		450974	39947704	4.73e+06	3.79106e+06	11686061
12854	Regions/clus7	32888	12226	0		493253	37743228	4.68537e+06	3.3826e+06	11036341
12856	Regions/clus7	33048	12226	0		407955	30840216	3.43427e+06	2.34093e+06	8863180
12868	Regions/clus7	25368	12146	0		558958	37913256	4891219	3.31102e+06	12096825
12869	Regions/clus7	25448	12146	0		528540	37750640	4.95969e+06	3.20567e+06	11259500
12871	Regions/clus7	25608	12146	0		569506	35139696	4.7223e+06	3.53979e+06	11968075
12872	Regions/clus7	25688	12146	0		594254	35859636	5.76839e+06	3602728	11550155
12873	Regions/clus7	25768	12146	0		635902	33724956	5629788	3.48129e+06	12553278
12874	Regions/clus7	25848	12146	0		559583	34725752	5284835	3.87962e+06	12076332
12875	Regions/clus7	25928	12146	0		607087	28639490	5166474	3585059	11436087
12876	Regions/clus7	26008	12146	0		809555	31128768	5403174	3.70263e+06	11053488
12877	Regions/clus7	26088	12146	0		803872	30138784	4.43481e+06	3219886	9723583
12878	Regions/clus7	26168	12146	0		1.01924e+06	29694432	5006346	3657763	10312810
12879	Regions/clus7	26248	12146	0		822476	26337884	4687847	3.42739e+06	9372634
12880	Regions/clus7	26328	12146	0		900690	26820276	5065874	3.40997e+06	8931426
12881	Regions/clus7	26408	12146	0		965614	27393398	4.72949e+06	4.04234e+06	7.62539e+06
12882	Regions/clus7	26488	12146	0		1.63907e+06	32001010	5514417	3803743	9807477
12883	Regions/clus7	26568	12146	0		1.96393e+06	30284030	4.78821e+06	3231691	8.01896e+06
12884	Regions/clus7	26648	12146	0		1.9206e+06	30101098	4590386	3.5197e+06	7.95097e+06
12885	Regions/clus7	26728	12146	0		2.05854e+06	29629502	4510313	3433104	7821371
12886	Regions/clus7	26808	12146	0		2354357	26878808	4806644	3427035	7800284
12887	Regions/clus7	26888	12146	0		2.85933e+06	29703294	4.84758e+06	3.12269e+06	7454494
12888	Regions/clus7	26968	12146	0		3459740	28096974	4457496	3316214	6.96677e+06
12889	Regions/clus7	27048	12146	0		2918968	23363020	3.48483e+06	2.89892e+06	6.02109e+06
12890	Regions/clus7	27128	12146	0		2.65564e+06	22652024	3.41196e+06	2.56529e+06	5.36138e+06
12911	Regions/clus7	28808	12146	0		2.28459e+06	31618032	5122375	3.33458e+06	7423988
12912	Regions/clus7	28888	12146	0		1.93652e+06	27382274	5.22964e+06	3.4345e+06	7.30993e+06
12913	Regions/clus7	28968	12146	0		1.67163e+06	26222016	4.69996e+06	3376941	6716977
12914	Regions/clus7	29048	12146	0		1.83822e+06	25148558	4.70659e+06	3.4669e+06	6652313
12915	Regions/clus7	29128	12146	0		1552261	20878230	3830493	2.79901e+06	5827187
12916	Regions/clus7	29208	12146	0		2.05653e+06	19282170	3323441	2.54612e+06	4.72946e+06
12917	Regions/clus7	29288	12146	0		1512171	16507925	3.66202e+06	2.24053e+06	4.64608e+06
12918	Regions/clus7	29368	12146	0		1.41402e+06	17768462	3.66699e+06	2.49113e+06	4.63955e+06
12919	Regions/clus7	29448	12146	0		1.32569e+06	14263240	2440466	1.91192e+06	4.24982e+06
12920	Regions/clus7	29528	12146	0		1.97233e+06	17750330	2.97943e+06	2.42806e+06	5104501
12921	Regions/clus7	29608	12146	0		1.84919e+06	16815586	2.91005e+06	2.5036e+06	4.89601e+06
12922	Regions/clus7	29688	12146	0		1337458	14418481	2.44267e+06	2.30929e+06	3.85552e+06
12944	Regions/clus7	31448	12146	0		2.21005e+06	34468568	5371563	3633197	10012174
12945	Regions/clus7	31528	12146	0		1.65708e+06	38361052	6228626	3.93414e+06	11097476
12946	Regions/clus7	31608	12146	0		1471844	39798520	5.89517e+06	4.04118e+06	12314358
12947	Regions/clus7	31688	12146	0		1.12451e+06	41983736	6378059	4.1717e+06	11821213
12948	Regions/clus7	31768	12146	0		1.20834e+06	38544228	5.58224e+06	4516973	11604072
12949	Regions/clus7	31848	12146	0		962281	38233296	6.23387e+06	4404427	12222347
12950	Regions/clus7	31928	12146	0		969141	47314760	5832947	4143862	13626064
12951	Regions/clus7	32008	12146	0		1.07745e+06	48380604	6.20325e+06	4367631	14665188
12953	Regions/clus7	32168	12146	0		833992	47951436	6.39385e+06	4725912	14265902
12954	Regions/clus7	32248	12146	0		647189	42151220	5892299	3896025	12169035
12955	Regions/clus7	32328	12146	0		576292	40251736	5.04099e+06	3879314	13018149
12956	Regions/clus7	32408	12146	0		766760	44636260	5.91031e+06	4102707	13768408
12958	Regions/clus7	32568	12146	0		634030	38652960	5109659	4.1572e+06	12508562
12959	Regions/clus7	32648	12146	0		761362	42129004	5206463	4196840	12935010
12960	Regions/clus7	32728	12146	0		370307	36875956	5.31381e+06	3969818	12035472
12961	Regions/clus7	32808	12146	0		396591	37171040	3.97803e+06	3471279	11213712
12962	Regions/clus7	32888	12146	0		349570	29344084	3.60033e+06	2985465	9238545
12977	Regions/clus7	25528	12066	0		614034	38332620	5.65466e+06	3.51397e+06	12919585
12978	Regions/clus7	25608	12066	0		714760	40574156	5623644	3.97612e+06	12190157
12979	Regions/clus7	25688	12066	0		627515	38310528	5838560	3.80934e+06	13214426
12980	Regions/clus7	25768	12066	0		710761	38719984	5.75571e+06	3.47068e+06	12312847
12981	Regions/clus7	25848	12066	0		701560	34451800	4965191	3374191	10920224
12982	Regions/clus7	25928	12066	0		775232	34068672	5598515	3555059	10811852
12983	Regions/clus7	26008	12066	0		868974	32821280	5270113	3.5534e+06	10718004
12984	Regions/clus7	26088	12066	0		982165	37099012	5641115	4032561	11998271
12985	Regions/clus7	26168	12066	0		969181	32020310	5.9788e+06	3952055	10642151
12986	Regions/clus7	26248	12066	0		1.4013e+06	36533024	5770928	3.94777e+06	11492270
12987	Regions/clus7	26328	12066	0		1.39588e+06	35953212	5.32356e+06	4236351	11719984
12988	Regions/clus7	26408	12066	0		1.43957e+06	36601828	5.71975e+06	3897630	10358902
12989	Regions/clus7	26488	12066	0		1.76627e+06	35738532	6417533	4.18503e+06	10282499
12990	Regions/clus7	26568	12066	0		2261940	36801400	5887700	3.92979e+06	10769943
12991	Regions/clus7	26648	12066	0		2.06225e+06	28876872	5691228	3.84173e+06	8608525
12992	Regions/clus7	26728	12066	0		3.1818e+06	35475420	5.08225e+06	3.8233e+06	9382080
12993	Regions/clus7	26808	12066	0		3.11392e+06	31457952	5285464	3.73169e+06	8832473
12994	Regions/clus7	26888	12066	0		3601287	33182774	5066991	3.46117e+06	8576854
12995	Regions/clus7	26968	12066	0		3.88289e+06	28538062	4.04592e+06	3.15945e+06	6903119
12996	Regions/clus7	27048	12066	0		3305532	25773658	3.82645e+06	2956062	6.57204e+06
13018	Regions/clus7	28808	12066	0		2.13338e+06	24113732	4691955	3043319	6309247
13019	Regions/clus7	28888	12066	0		1.78346e+06	19930562	3.98453e+06	2.75633e+06	5614832
13020	Regions/clus7	28968	12066	0		1.57509e+06	20320718	3.89453e+06	3.0371e+06	5692388
13021	Regions/clus7	29048	12066	0		2.54836e+06	23438498	3.90734e+06	2.74179e+06	6040098
13022	Regions/clus7	29128	12066	0		1.79878e+06	20311704	3.20243e+06	2.44056e+06	5734450
13023	Regions/clus7	29208	12066	0		1.78729e+06	19713632	3.70775e+06	2682249	5.38781e+06
13024	Regions/clus7	29288	12066	0		2.03301e+06	18230558	3.4548e+06	2.49191e+06	5267639
13025	Regions/clus7	29368	12066	0		1.5006e+06	15736128	2.82201e+06	2.29386e+06	4576625
13026	Regions/clus7	29448	12066	0		1.57088e+06	13523908	2.377e+06	1.8188e+06	3956301
13027	Regions/clus7	29528	12066	0		1.89678e+06	14695418	2.19731e+06	1.91489e+06	3.5156e+06
13028	Regions/clus7	29608	12066	0		1.78786e+06	14808803	2.17986e+06	1.65763e+06	3.57337e+06
13029	Regions/clus7	29688	12066	0		1.5097e+06	13470994	2.29995e+06	1.79735e+06	3538264
13030	Regions/clus7	29768	12066	0		1543495	12262868	2.30732e+06	1.63234e+06	3.54947e+06
13050	Regions/clus7	31368	12066	0		1.60568e+06	23951382	3.48376e+06	2228706	5744980
13051	Regions/clus7	31448	12066	0		1.61955e+06	27410426	4.0696e+06	2825325	7747667
13052	Regions/clus7	31528	12066	0		1465054	30455952	4656608	2.9038e+06	8504045
13053	Regions/clus7	31608	12066	0		1.38858e+06	32368128	5173364	3.47677e+06	10206866
13054	Regions/clus7	31688	12066	0		1003684	31570672	5.29225e+06	3419782	10417030
13055	Regions/clus7	31768	12066	0		1169059	39970760	5806252	4.23623e+06	11482623
13056	Regions/clus7	31848	12066	0		999172	39256276	5.5323e+06	3.68008e+06	11492904
13057	Regions/clus7	31928	12066	0		669271	36776824	5.8585e+06	3.80647e+06	12195407
13058	Regions/clus7	32008	12066	0		802614	44196516	5.68383e+06	4.55768e+06	12875254
13060	Regions/clus7	32168	12066	0		608735	37958248	5417942	3.95344e+06	11309049
13061	Regions/clus7	32248	12066	0		794530	39631424	5129588	3610145	11732357
13062	Regions/clus7	32328	12066	0		519416	37972052	5262682	3.50206e+06	12616478
13063	Regions/clus7	32408	12066	0		529722	40230236	5095311	3.88359e+06	12849979
13064	Regions/clus7	32488	12066	0		610681	40181672	5.30584e+06	4.07485e+06	13375602
13065	Regions/clus7	32568	12066	0		533630	38589496	5.24046e+06	3575674	11955039
13066	Regions/clus7	32648	12066	0		562647	35855336	4455582	3.7784e+06	11081066
13067	Regions/clus7	32728	12066	0		467803	30389402	3.98464e+06	3.30987e+06	9302922
13068	Regions/clus7	32808	12066	0		264951	29730808	3.61065e+06	2.88195e+06	9250168
13083	Regions/clus7	25528	11986	0		774402	41854952	5830154	3.62045e+06	13440422
13084	Regions/clus7	25608	11986	0		809050	45641564	5197497	3.60394e+06	13183644
13085	Regions/clus7	25688	11986	0		1.02131e+06	45689728	6026469	3.8384e+06	13601023
13086	Regions/clus7	25768	11986	0		656752	38817560	5522119	3.68926e+06	12432844
13087	Regions/clus7	25848	11986	0		866934	39700816	5534507	4144458	12108290
13088	Regions/clus7	25928	11986	0		1.04215e+06	40697128	5.58324e+06	4130992	11806652
13089	Regions/clus7	26008	11986	0		1.09122e+06	36912648	5.83855e+06	3.88879e+06	12036698
13090	Regions/clus7	26088	11986	0		1440810	42706188	6149596	4.28144e+06	12604235
13091	Regions/clus7	26168	11986	0		1.36233e+06	39289336	6093892	4.19855e+06	11869865
13092	Regions/clus7	26248	11986	0		1.79131e+06	43718280	6632175	4346967	13096751
13093	Regions/clus7	26328	11986	0		1.87029e+06	41219184	6.29409e+06	4783356	11605841
13094	Regions/clus7	26408	11986	0		1.81733e+06	37097300	6.74607e+06	4043401	11237720
13095	Regions/clus7	26488	11986	0		2.14038e+06	36561388	5907793	4.03425e+06	9975726
13096	Regions/clus7	26568	11986	0		2.62015e+06	39861868	5.88379e+06	3.59569e+06	10622950
13097	Regions/clus7	26648	11986	0		2.55713e+06	37475816	5.65599e+06	4.0041e+06	10386717
13098	Regions/clus7	26728	11986	0		2.52602e+06	33783180	4.95364e+06	3.76007e+06	8905093
13099	Regions/clus7	26808	11986	0		2194748	23369188	4252411	2.89043e+06	6584358
13100	Regions/clus7	26888	11986	0		3131566	26034672	3.98737e+06	3.43427e+06	7.09573e+06
13101	Regions/clus7	26968	11986	0		3.69828e+06	25550346	3.57745e+06	2820384	6137026
13102	Regions/clus7	27048	11986	0		3.68691e+06	22026544	3545501	2654303	6.24288e+06
13103	Regions/clus7	27128	11986	0		4.00811e+06	23009612	3946921	2.65555e+06	6226847
13104	Regions/clus7	27208	11986	0		4410454	23612486	3419123	2.50297e+06	5.87332e+06
13125	Regions/clus7	28888	11986	0		2018212	21121940	3412696	2.50766e+06	5685854
13126	Regions/clus7	28968	11986	0		2116448	20960600	3.40825e+06	2.58866e+06	5.38084e+06
13127	Regions/clus7	29048	11986	0		1797032	18882016	3178010	2436234	4884641
13128	Regions/clus7	29128	11986	0		1.69179e+06	16529862	2984273	2.3454e+06	4452809
13129	Regions/clus7	29208	11986	0		1440638	16412093	3.11656e+06	2.03851e+06	4846188
13130	Regions/clus7	29288	11986	0		2.18827e+06	15772134	2766827	1984837	4.64285e+06
13131	Regions/clus7	29368	11986	0		936883	10854173	2.36136e+06	1.61246e+06	3.30916e+06
13132	Regions/clus7	29448	11986	0		1365214	11347032	1.94361e+06	1.45961e+06	3.1804e+06
13133	Regions/clus7	29528	11986	0		1.91123e+06	11494890	1.92837e+06	1.38153e+06	3.07154e+06
13134	Regions/clus7	29608	11986	0		1.5569e+06	9739477	1.57675e+06	1.40384e+06	2427137
13135	Regions/clus7	29688	11986	0		1.29987e+06	9937928	1.55657e+06	1272239	2.97993e+06
[truncated: 6,372 more rows]
