# Supplementary material for: Untargeted pixel-by-pixel metabolite ratio imaging as a novel tool for biomedical discovery in mass spectrometry imaging
Source: eLife. 2025 Mar 18;13:RP96892. doi: 10.7554/eLife.96892 (PMC11919253; doi:10.7554/eLife.96892)
Supplement: Figure 8—figure supplement 5—source data 1. [file elife-96892-fig8-figsupp5-data1.xlsx]

## Sheet: ROI 7 WT corr matrix
Entity	Glucose.Glutamate	Glucose.Glutamine	Glucose.Acetylaspartate	Glucose.N_Acetylaspartylglutamate	Glucose.Taurine	Glucose.GSH	Citric_Acid.Glutamate	Citrate.N_Acetylaspartylglutamate	Citrate.Taurine	Malate.Glutamate	Malate.N_Acetylaspartylglutamate	Malate.Taurine	Aspartate.Glutamate	Aspartate.N_Acetylaspartylglutamate	Aspartate.Taurine	Glutamate.Glutamine	Glutamate.N.Acetylaspartate	Glutamate.N_Acetylaspartylglutamate	Glutamate.GSH	Glutamine.N.Acetylaspartate	Glutamine.N_Acetylaspartylglutamate	Glutamine.Taurine	N.Acetylaspartate.N_Acetylaspartylglutamate	N.Acetylaspartate.Taurine	N_Acetylaspartylglutamate.Taurine	N_Acetylaspartylglutamate.GSH	Taurine.GSH	Glutamate.Glucose	Glutamine.Glucose	N.Acetylaspartate.Glucose	N_Acetylaspartylglutamate..Glucose	Taurine.Glucose	GSH.Glucose	Glutamate.Citric_Acid	N_Acetylaspartylglutamate.Citric_Acid	Taurine.Citric_Acid	Glutamate.Malic_Acid	N_Acetylaspartylglutamate.Malic_Acid	Taurine.Malic_Acid	Glutamate.Aspartic_Acid	N_Acetylaspartylglutamate.Aspartic_Acid	Taurine._Aspartic_Acid	Glutamine.Glutamate	N.Acetylaspartate.Glutamate	N_Acetylaspartylglutamate.Glutamate	GSH.Glutamate	N.Acetylaspartate.Glutamine	N_Acetylaspartylglutamate.Glutamine	Taurine.Glutamine
Glucose.Glutamate	1	0.821403	0.783354	-0.393839	0.852427	0.674695	0.163661	-0.778434	0.322048	0.492142	-0.6876	0.558248	0.651001	-0.677136	0.60164	-0.852794	-0.389269	-0.764263	-0.437074	0.503414	-0.656274	0.712215	-0.810918	0.466107	0.782901	0.765777	-0.579062	-1	-0.821414	-0.783413	0.39385	-0.852474	-0.674741	-0.163683	0.778433	-0.322086	-0.492163	0.687599	-0.558243	-0.651034	0.677151	-0.601645	0.852792	0.38932	0.764271	0.437075	-0.503434	0.656272	-0.712251
Glucose.Glutamine	0.821403	1	0.858285	-0.116475	0.793569	0.744367	-0.159935	-0.653416	0.077616	0.162078	-0.545966	0.367006	0.277978	-0.497424	0.454163	-0.43177	-0.0222744	-0.486116	-0.131163	0.443483	-0.471344	0.542799	-0.615163	0.284661	0.572235	0.568647	-0.402742	-0.821408	-0.999999	-0.858283	0.116482	-0.793592	-0.744404	0.159916	0.653427	-0.0776128	-0.162092	0.545961	-0.366998	-0.277986	0.497441	-0.454177	0.431771	0.0223478	0.48614	0.131159	-0.443497	0.471343	-0.542837
Glucose.Acetylaspartate	0.783354	0.858285	1	0.0645212	0.798937	0.815971	-0.3028	-0.578516	-0.0306689	0.0586427	-0.429366	0.31774	0.244893	-0.326619	0.484487	-0.485567	0.224813	-0.349076	0.010614	0.821436	-0.265186	0.627835	-0.555108	0.133007	0.470928	0.46993	-0.314109	-0.783359	-0.858293	-0.999996	-0.0645311	-0.798968	-0.816013	0.30279	0.578514	0.0306699	-0.0586192	0.429364	-0.317741	-0.244918	0.326634	-0.484498	0.485571	-0.224791	0.349079	-0.0106532	-0.821455	0.265176	-0.62787
Glucose.N_Acetylaspartylglutamate	-0.393839	-0.116475	0.0645212	1	-0.256766	0.0737298	-0.581472	0.594253	-0.543074	-0.555004	0.732275	-0.395321	-0.550333	0.857519	-0.296909	0.546763	0.770087	0.874046	0.669172	0.243078	0.912406	-0.28959	0.748181	-0.537843	-0.775847	-0.739212	0.575538	0.393798	0.116443	-0.0646228	-1	0.256616	-0.073774	0.581517	-0.594247	0.543128	0.554985	-0.732276	0.395304	0.550315	-0.857518	0.296862	-0.546763	-0.770094	-0.874045	-0.669219	-0.243113	-0.912403	0.289542
Glucose.Taurine	0.852427	0.793569	0.798937	-0.256766	1	0.797546	-0.0861455	-0.731678	0.397607	0.301756	-0.599484	0.692525	0.49438	-0.534387	0.839617	-0.64427	-0.155	-0.605118	-0.13263	0.554305	-0.524773	0.931396	-0.713426	0.66826	0.771472	0.716433	-0.648546	-0.852438	-0.793582	-0.799026	0.256771	-0.999995	-0.797577	0.0860968	0.731685	-0.397649	-0.301751	0.599485	-0.69253	-0.494426	0.534406	-0.839618	0.64428	0.154996	0.605142	0.132623	-0.554305	0.524774	-0.931402
Glucose.GSH	0.674695	0.744367	0.815971	0.0737298	0.797546	1	-0.399226	-0.556043	-0.0230934	0.0194989	-0.368319	0.379526	0.215256	-0.256233	0.573668	-0.40972	0.146885	-0.282471	0.294546	0.635586	-0.20903	0.689487	-0.433297	0.322377	0.432055	0.537373	-0.133628	-0.674714	-0.74437	-0.816019	-0.0737286	-0.797587	-0.999999	0.399189	0.556033	0.0230292	-0.0195107	0.368319	-0.379533	-0.215271	0.256245	-0.573696	0.409744	-0.146892	0.282482	-0.294547	-0.635589	0.209024	-0.689514
Citric_Acid.Glutamate	0.163661	-0.159935	-0.3028	-0.581472	-0.0861455	-0.399226	1	0.0521412	0.717165	0.655059	-0.194575	0.283347	0.526602	-0.378949	0.0422267	-0.414207	-0.72505	-0.481711	-0.752029	-0.357851	-0.451548	-0.0401652	-0.288212	0.246997	0.301965	0.208428	-0.381652	-0.1636	0.159986	0.302877	0.581477	0.0862281	0.399259	-0.999999	-0.0521318	-0.717164	-0.655065	0.194575	-0.28333	-0.526605	0.378946	-0.0421925	0.414212	0.725055	0.481715	0.752059	0.357879	0.451549	0.0402325
Citrate.N_Acetylaspartylglutamate	-0.778434	-0.653416	-0.578516	0.594253	-0.731678	-0.556043	0.0521412	1	-0.161729	-0.333568	0.837552	-0.463831	-0.499376	0.800978	-0.552017	0.67006	0.372516	0.806285	0.325433	-0.321849	0.782636	-0.651093	0.865436	-0.519865	-0.854542	-0.878799	0.558919	0.778444	0.653421	0.578495	-0.594263	0.73166	0.556057	-0.0521385	-1	0.161729	0.333555	-0.837553	0.463828	0.499377	-0.800978	0.552018	-0.670031	-0.372566	-0.806285	-0.325466	0.321839	-0.782635	0.651135
Citrate.Taurine	0.322048	0.077616	-0.0306689	-0.543074	0.397607	-0.0230934	0.717165	-0.161729	1	0.596063	-0.313163	0.693807	0.566549	-0.423278	0.574766	-0.444846	-0.582381	-0.537368	-0.514768	-0.144333	-0.510337	0.501216	-0.43044	0.71898	0.574532	0.407314	-0.728176	-0.321997	-0.0775775	0.030687	0.543086	-0.397542	0.0231202	-0.717165	0.161744	-0.999999	-0.596081	0.313165	-0.693805	-0.566586	0.42329	-0.57475	0.444862	0.582354	0.537404	0.51478	0.144358	0.510348	-0.501207
Malate.Glutamate	0.492142	0.162078	0.0586427	-0.555004	0.301756	0.0194989	0.655059	-0.333568	0.596063	1	-0.195145	0.752448	0.756832	-0.452315	0.401693	-0.650339	-0.687815	-0.612541	-0.657518	-0.0653119	-0.543735	0.32508	-0.486687	0.439677	0.50585	0.446164	-0.507622	-0.492109	-0.162103	-0.0586684	0.555022	-0.301686	-0.0195084	-0.65502	0.333548	-0.596015	-0.999999	0.19515	-0.752445	-0.75684	0.452321	-0.401683	0.650314	0.687836	0.61257	0.657509	0.0652775	0.543739	-0.325046
Malate.N_Acetylaspartylglutamate	-0.6876	-0.545966	-0.429366	0.732275	-0.599484	-0.368319	-0.194575	0.837552	-0.313163	-0.195145	1	-0.25035	-0.439199	0.904104	-0.41134	0.624522	0.474568	0.865297	0.458152	-0.173935	0.870074	-0.520265	0.882209	-0.494555	-0.862302	-0.852353	0.586035	0.687574	0.545903	0.429207	-0.732276	0.599415	0.368297	0.19462	-0.837553	0.313238	0.195183	-1	0.250341	0.4392	-0.904104	0.411317	-0.624529	-0.474595	-0.865296	-0.458206	0.173882	-0.870072	0.52028
Malate.Taurine	0.558248	0.367006	0.31774	-0.395321	0.692525	0.379526	0.283347	-0.463831	0.693807	0.752448	-0.25035	1	0.648825	-0.395104	0.8154	-0.561599	-0.413266	-0.541264	-0.305824	0.160936	-0.479973	0.759124	-0.521961	0.767719	0.646795	0.548077	-0.688816	-0.558243	-0.367069	-0.317878	0.395337	-0.692538	-0.379567	-0.283324	0.463827	-0.693751	-0.752435	0.250356	-1	-0.648852	0.395112	-0.815413	0.561575	0.413254	0.541304	0.305793	-0.160963	0.479985	-0.759142
Aspartate.Glutamate	0.651001	0.277978	0.244893	-0.550333	0.49438	0.215256	0.526602	-0.499376	0.566549	0.756832	-0.439199	0.648825	1	-0.462842	0.654309	-0.801488	-0.63582	-0.700226	-0.583856	0.142963	-0.587413	0.52357	-0.622133	0.520113	0.645561	0.603184	-0.549786	-0.651001	-0.278006	-0.244996	0.550345	-0.494403	-0.215295	-0.526635	0.499365	-0.566595	-0.756885	0.4392	-0.648816	-0.999997	0.462836	-0.654312	0.80146	0.635835	0.700232	0.583862	-0.142997	0.587412	-0.523579
Aspartate.N_Acetylaspartylglutamate	-0.677136	-0.497424	-0.326619	0.857519	-0.534387	-0.256233	-0.378949	0.800978	-0.423278	-0.452315	0.904104	-0.395104	-0.462842	1	-0.341392	0.659178	0.617273	0.941633	0.606224	-0.0450546	0.960689	-0.457447	0.908728	-0.511529	-0.885476	-0.865095	0.629292	0.677097	0.497356	0.326448	-0.857519	0.534264	0.256192	0.378992	-0.800978	0.42333	0.452299	-0.904104	0.395089	0.462821	-1	0.341356	-0.659184	-0.617304	-0.941633	-0.606278	0.0450008	-0.960687	0.457426
Aspartate.Taurine	0.60164	0.454163	0.484487	-0.296909	0.839617	0.573668	0.0422267	-0.552017	0.574766	0.401693	-0.41134	0.8154	0.654309	-0.341392	1	-0.543995	-0.232041	-0.507433	-0.108108	0.364418	-0.429391	0.917524	-0.561408	0.792642	0.686616	0.605417	-0.661541	-0.601653	-0.454203	-0.484632	0.296909	-0.839644	-0.573708	-0.0422697	0.55202	-0.574797	-0.401679	0.411344	-0.815408	-0.654354	0.341395	-0.999999	0.543982	0.232014	0.507453	0.108098	-0.364431	0.429393	-0.91753
Glutamate.Glutamine	-0.852794	-0.43177	-0.485567	0.546763	-0.64427	-0.40972	-0.414207	0.67006	-0.444846	-0.650339	0.624522	-0.561599	-0.801488	0.659178	-0.543995	1	0.603497	0.800126	0.592152	-0.402121	0.643226	-0.648907	0.759939	-0.480132	-0.747279	-0.725657	0.567927	0.852796	0.431763	0.485692	-0.546774	0.644298	0.409755	0.414242	-0.670054	0.444919	0.650356	-0.624526	0.561596	0.801508	-0.659182	0.543992	-0.999999	-0.60352	-0.800114	-0.592168	0.40213	-0.64322	0.648922
Glutamate.N.Acetylaspartate	-0.389269	-0.0222744	0.224813	0.770087	-0.155	0.146885	-0.72505	0.372516	-0.582381	-0.687815	0.474568	-0.413266	-0.63582	0.617273	-0.232041	0.603497	1	0.705011	0.740563	0.424704	0.675468	-0.198455	0.456769	-0.585536	-0.55735	-0.510383	0.499002	0.389247	0.0222621	-0.224821	-0.770103	0.154909	-0.146916	0.725065	-0.372513	0.582432	0.687866	-0.474569	0.413252	0.635829	-0.617277	0.232019	-0.603476	-0.999999	-0.70501	-0.740599	-0.424715	-0.675468	0.198437
Glutamate.N_Acetylaspartylglutamate	-0.764263	-0.486116	-0.349076	0.874046	-0.605118	-0.282471	-0.481711	0.806285	-0.537368	-0.612541	0.865297	-0.541264	-0.700226	0.941633	-0.507433	0.800126	0.705011	1	0.676309	-0.0975889	0.963914	-0.559376	0.943241	-0.594164	-0.939085	-0.905281	0.691162	0.764232	0.48608	0.348999	-0.874046	0.605034	0.282445	0.481754	-0.806282	0.537421	0.612532	-0.865297	0.541248	0.700226	-0.941633	0.507411	-0.800127	-0.705037	-1	-0.676357	0.0975527	-0.963911	0.559365
Glutamate.GSH	-0.437074	-0.131163	0.010614	0.669172	-0.13263	0.294546	-0.752029	0.325433	-0.514768	-0.657518	0.458152	-0.305824	-0.583856	0.606224	-0.108108	0.592152	0.740563	0.676309	1	0.158123	0.6459	-0.102137	0.534497	-0.277277	-0.503625	-0.340065	0.645709	0.437007	0.131091	-0.0107842	-0.669177	0.13248	-0.294545	0.752004	-0.325448	0.514734	0.657536	-0.458153	0.305808	0.583869	-0.606234	0.108037	-0.592107	-0.740587	-0.676308	-0.999999	-0.158141	-0.645902	0.102105
Glutamine.N.Acetylaspartate	0.503414	0.443483	0.821436	0.243078	0.554305	0.635586	-0.357851	-0.321849	-0.144333	-0.0653119	-0.173935	0.160936	0.142963	-0.0450546	0.364418	-0.402121	0.424704	-0.0975889	0.158123	1	0.0398839	0.521	-0.32292	-0.0811928	0.212492	0.22018	-0.112137	-0.503432	-0.443475	-0.821462	-0.243088	-0.554401	-0.635632	0.357844	0.321843	0.144316	0.0653589	0.173938	-0.160949	-0.142993	0.045069	-0.364428	0.402144	-0.424708	0.0975736	-0.158158	-0.999999	-0.0398879	-0.521013
Glutamine.N_Acetylaspartylglutamate	-0.656274	-0.471344	-0.265186	0.912406	-0.524773	-0.20903	-0.451548	0.782636	-0.510337	-0.543735	0.870074	-0.479973	-0.587413	0.960689	-0.429391	0.643226	0.675468	0.963914	0.6459	0.0398839	1	-0.45962	0.910921	-0.572907	-0.907187	-0.873273	0.671686	0.656226	0.471304	0.265018	-0.912406	0.524636	0.208992	0.451592	-0.782633	0.510378	0.543725	-0.870074	0.479953	0.587391	-0.96069	0.429359	-0.643203	-0.67549	-0.963914	-0.645942	-0.0399101	-1	0.459608
Glutamine.Taurine	0.712215	0.542799	0.627835	-0.28959	0.931396	0.689487	-0.0401652	-0.651093	0.501216	0.32508	-0.520265	0.759124	0.52357	-0.457447	0.917524	-0.648907	-0.198455	-0.559376	-0.102137	0.521	-0.45962	1	-0.638152	0.771198	0.743563	0.672136	-0.674195	-0.712232	-0.542831	-0.627995	0.289589	-0.9314	-0.689524	0.0401178	0.651097	-0.501258	-0.325057	0.52027	-0.759131	-0.523619	0.457457	-0.917524	0.648915	0.198426	0.559388	0.102129	-0.521005	0.459622	-0.999999
N.Acetylaspartate.N_Acetylaspartylglutamate	-0.810918	-0.615163	-0.555108	0.748181	-0.713426	-0.433297	-0.288212	0.865436	-0.43044	-0.486687	0.882209	-0.521961	-0.622133	0.908728	-0.561408	0.759939	0.456769	0.943241	0.534497	-0.32292	0.910921	-0.638152	1	-0.501401	-0.940649	-0.91596	0.669986	0.810883	0.615106	0.554997	-0.748181	0.713343	0.433286	0.288256	-0.865432	0.430495	0.486654	-0.88221	0.521946	0.62213	-0.908728	0.56138	-0.759953	-0.456813	-0.943242	-0.534543	0.322868	-0.910918	0.638148
N.Acetylaspartate.Taurine	0.466107	0.284661	0.133007	-0.537843	0.66826	0.322377	0.246997	-0.519865	0.71898	0.439677	-0.494555	0.767719	0.520113	-0.511529	0.792642	-0.480132	-0.585536	-0.594164	-0.277277	-0.0811928	-0.572907	0.771198	-0.501401	1	0.725008	0.619546	-0.738063	-0.466116	-0.284715	-0.133146	0.537857	-0.668241	-0.322378	-0.247044	0.519871	-0.71901	-0.439691	0.494558	-0.767721	-0.520162	0.511536	-0.792648	0.480105	0.5855	0.594191	0.277298	0.0811811	0.572918	-0.771197
N_Acetylaspartylglutamate.Taurine	0.782901	0.572235	0.470928	-0.775847	0.771472	0.432055	0.301965	-0.854542	0.574532	0.50585	-0.862302	0.646795	0.645561	-0.885476	0.686616	-0.747279	-0.55735	-0.939085	-0.503625	0.212492	-0.907187	0.743563	-0.940649	0.725008	1	0.93587	-0.774209	-0.782881	-0.572221	-0.470912	0.775847	-0.77143	-0.432044	-0.302012	0.854541	-0.574582	-0.505807	0.862304	-0.646784	-0.645582	0.885476	-0.686616	0.747286	0.557389	0.939086	0.503682	-0.212464	0.907186	-0.743581
N_Acetylaspartylglutamate.GSH	0.765777	0.568647	0.46993	-0.739212	0.716433	0.537373	0.208428	-0.878799	0.407314	0.446164	-0.852353	0.548077	0.603184	-0.865095	0.605417	-0.725657	-0.510383	-0.905281	-0.340065	0.22018	-0.873273	0.672136	-0.91596	0.619546	0.93587	1	-0.542287	-0.765777	-0.568653	-0.469968	0.739212	-0.716425	-0.537359	-0.208474	0.878798	-0.407364	-0.446136	0.852353	-0.54806	-0.603184	0.865095	-0.605428	0.725677	0.510415	0.905281	0.340143	-0.220153	0.873271	-0.672145
Taurine.GSH	-0.579062	-0.402742	-0.314109	0.575538	-0.648546	-0.133628	-0.381652	0.558919	-0.728176	-0.507622	0.586035	-0.688816	-0.549786	0.629292	-0.661541	0.567927	0.499002	0.691162	0.645709	-0.112137	0.671686	-0.674195	0.669986	-0.738063	-0.774209	-0.542287	1	0.57902	0.402697	0.313985	-0.575543	0.648465	0.133641	0.381656	-0.558941	0.728125	0.507585	-0.586038	0.68881	0.549833	-0.629312	0.661525	-0.567887	-0.499029	-0.69119	-0.645703	0.112116	-0.671698	0.674235
Glutamate.Glucose	-1	-0.821408	-0.783359	0.393798	-0.852438	-0.674714	-0.1636	0.778444	-0.321997	-0.492109	0.687574	-0.558243	-0.651001	0.677097	-0.601653	0.852796	0.389247	0.764232	0.437007	-0.503432	0.656226	-0.712232	0.810883	-0.466116	-0.782881	-0.765777	0.57902	1	0.821419	0.783418	-0.393808	0.852486	0.67476	0.163622	-0.778444	0.322035	0.492131	-0.687574	0.558237	0.651034	-0.677112	0.601657	-0.852794	-0.389299	-0.76424	-0.437008	0.503451	-0.656224	0.712268
Glutamine.Glucose	-0.821414	-0.999999	-0.858293	0.116443	-0.793582	-0.74437	0.159986	0.653421	-0.0775775	-0.162103	0.545903	-0.367069	-0.278006	0.497356	-0.454203	0.431763	0.0222621	0.48608	0.131091	-0.443475	0.471304	-0.542831	0.615106	-0.284715	-0.572221	-0.568653	0.402697	0.821419	1	0.858292	-0.116451	0.793606	0.744407	-0.159966	-0.653432	0.0775742	0.162117	-0.545898	0.367062	0.278013	-0.497372	0.454217	-0.431764	-0.0223355	-0.486104	-0.131087	0.443489	-0.471304	0.54287
N.Acetylaspartate.Glucose	-0.783413	-0.858283	-0.999996	-0.0646228	-0.799026	-0.816019	0.302877	0.578495	0.030687	-0.0586684	0.429207	-0.317878	-0.244996	0.326448	-0.484632	0.485692	-0.224821	0.348999	-0.0107842	-0.821462	0.265018	-0.627995	0.554997	-0.133146	-0.470912	-0.469968	0.313985	0.783418	0.858292	1	0.0646327	0.799058	0.816062	-0.302867	-0.578493	-0.030688	0.0586449	-0.429206	0.317878	0.245021	-0.326463	0.484642	-0.485696	0.224799	-0.349003	0.0108234	0.821481	-0.265008	0.62803
N_Acetylaspartylglutamate..Glucose	0.39385	0.116482	-0.0645311	-1	0.256771	-0.0737286	0.581477	-0.594263	0.543086	0.555022	-0.732276	0.395337	0.550345	-0.857519	0.296909	-0.546774	-0.770103	-0.874046	-0.669177	-0.243088	-0.912406	0.289589	-0.748181	0.537857	0.775847	0.739212	-0.575543	-0.393808	-0.116451	0.0646327	1	-0.256621	0.0737729	-0.581523	0.594257	-0.54314	-0.555003	0.732277	-0.39532	-0.550327	0.857519	-0.296862	0.546774	0.77011	0.874046	0.669223	0.243123	0.912404	-0.289541
Taurine.Glucose	-0.852474	-0.793592	-0.798968	0.256616	-0.999995	-0.797587	0.0862281	0.73166	-0.397542	-0.301686	0.599415	-0.692538	-0.494403	0.534264	-0.839644	0.644298	0.154909	0.605034	0.13248	-0.554401	0.524636	-0.9314	0.713343	-0.668241	-0.77143	-0.716425	0.648465	0.852486	0.793606	0.799058	-0.256621	1	0.797619	-0.0861793	-0.731667	0.397584	0.301681	-0.599416	0.692543	0.494449	-0.534283	0.839646	-0.644307	-0.154905	-0.605058	-0.132473	0.5544	-0.524636	0.931408
GSH.Glucose	-0.674741	-0.744404	-0.816013	-0.073774	-0.797577	-0.999999	0.399259	0.556057	0.0231202	-0.0195084	0.368297	-0.379567	-0.215295	0.256192	-0.573708	0.409755	-0.146916	0.282445	-0.294545	-0.635632	0.208992	-0.689524	0.433286	-0.322378	-0.432044	-0.537359	0.133641	0.67476	0.744407	0.816062	0.0737729	0.797619	1	-0.399222	-0.556047	-0.023056	0.0195202	-0.368297	0.379575	0.21531	-0.256204	0.573737	-0.409778	0.146924	-0.282457	0.294546	0.635635	-0.208986	0.689551
Glutamate.Citric_Acid	-0.163683	0.159916	0.30279	0.581517	0.0860968	0.399189	-0.999999	-0.0521385	-0.717165	-0.65502	0.19462	-0.283324	-0.526635	0.378992	-0.0422697	0.414242	0.725065	0.481754	0.752004	0.357844	0.451592	0.0401178	0.288256	-0.247044	-0.302012	-0.208474	0.381656	0.163622	-0.159966	-0.302867	-0.581523	-0.0861793	-0.399222	1	0.0521293	0.717165	0.655026	-0.194619	0.283308	0.526638	-0.378988	0.0422355	-0.414247	-0.72507	-0.481758	-0.752034	-0.357872	-0.451593	-0.0401851
N_Acetylaspartylglutamate.Citric_Acid	0.778433	0.653427	0.578514	-0.594247	0.731685	0.556033	-0.0521318	-1	0.161744	0.333548	-0.837553	0.463827	0.499365	-0.800978	0.55202	-0.670054	-0.372513	-0.806282	-0.325448	0.321843	-0.782633	0.651097	-0.865432	0.519871	0.854541	0.878798	-0.558941	-0.778444	-0.653432	-0.578493	0.594257	-0.731667	-0.556047	0.0521293	1	-0.161744	-0.333535	0.837554	-0.463823	-0.499366	0.800978	-0.552021	0.670025	0.372563	0.806283	0.325481	-0.321832	0.782633	-0.651138
Taurine.Citric_Acid	-0.322086	-0.0776128	0.0306699	0.543128	-0.397649	0.0230292	-0.717164	0.161729	-0.999999	-0.596015	0.313238	-0.693751	-0.566595	0.42333	-0.574797	0.444919	0.582432	0.537421	0.514734	0.144316	0.510378	-0.501258	0.430495	-0.71901	-0.574582	-0.407364	0.728125	0.322035	0.0775742	-0.030688	-0.54314	0.397584	-0.023056	0.717165	-0.161744	1	0.596033	-0.31324	0.693749	0.566633	-0.423342	0.574782	-0.444934	-0.582405	-0.537457	-0.514747	-0.144341	-0.510389	0.501249
Glutamate.Malic_Acid	-0.492163	-0.162092	-0.0586192	0.554985	-0.301751	-0.0195107	-0.655065	0.333555	-0.596081	-0.999999	0.195183	-0.752435	-0.756885	0.452299	-0.401679	0.650356	0.687866	0.612532	0.657536	0.0653589	0.543725	-0.325057	0.486654	-0.439691	-0.505807	-0.446136	0.507585	0.492131	0.162117	0.0586449	-0.555003	0.301681	0.0195202	0.655026	-0.333535	0.596033	1	-0.195188	0.752432	0.756892	-0.452305	0.401669	-0.650332	-0.687888	-0.612561	-0.657526	-0.0653245	-0.543729	0.325023
N_Acetylaspartylglutamate.Malic_Acid	0.687599	0.545961	0.429364	-0.732276	0.599485	0.368319	0.194575	-0.837553	0.313165	0.19515	-1	0.250356	0.4392	-0.904104	0.411344	-0.624526	-0.474569	-0.865297	-0.458153	0.173938	-0.870074	0.52027	-0.88221	0.494558	0.862304	0.852353	-0.586038	-0.687574	-0.545898	-0.429206	0.732277	-0.599416	-0.368297	-0.194619	0.837554	-0.31324	-0.195188	1	-0.250347	-0.439201	0.904104	-0.411321	0.624534	0.474596	0.865297	0.458208	-0.173885	0.870072	-0.520286
Taurine.Malic_Acid	-0.558243	-0.366998	-0.317741	0.395304	-0.69253	-0.379533	-0.28333	0.463828	-0.693805	-0.752445	0.250341	-1	-0.648816	0.395089	-0.815408	0.561596	0.413252	0.541248	0.305808	-0.160949	0.479953	-0.759131	0.521946	-0.767721	-0.646784	-0.54806	0.68881	0.558237	0.367062	0.317878	-0.39532	0.692543	0.379575	0.283308	-0.463823	0.693749	0.752432	-0.250347	1	0.648842	-0.395096	0.815421	-0.561572	-0.413239	-0.541288	-0.305777	0.160976	-0.479965	0.759148
Glutamate.Aspartic_Acid	-0.651034	-0.277986	-0.244918	0.550315	-0.494426	-0.215271	-0.526605	0.499377	-0.566586	-0.75684	0.4392	-0.648852	-0.999997	0.462821	-0.654354	0.801508	0.635829	0.700226	0.583869	-0.142993	0.587391	-0.523619	0.62213	-0.520162	-0.645582	-0.603184	0.549833	0.651034	0.278013	0.245021	-0.550327	0.494449	0.21531	0.526638	-0.499366	0.566633	0.756892	-0.439201	0.648842	1	-0.462815	0.654357	-0.80148	-0.635844	-0.700232	-0.583875	0.143027	-0.58739	0.523628
N_Acetylaspartylglutamate.Aspartic_Acid	0.677151	0.497441	0.326634	-0.857518	0.534406	0.256245	0.378946	-0.800978	0.42329	0.452321	-0.904104	0.395112	0.462836	-1	0.341395	-0.659182	-0.617277	-0.941633	-0.606234	0.045069	-0.96069	0.457457	-0.908728	0.511536	0.885476	0.865095	-0.629312	-0.677112	-0.497372	-0.326463	0.857519	-0.534283	-0.256204	-0.378988	0.800978	-0.423342	-0.452305	0.904104	-0.395096	-0.462815	1	-0.341359	0.659188	0.617307	0.941633	0.606287	-0.0450152	0.960687	-0.457437
Taurine._Aspartic_Acid	-0.601645	-0.454177	-0.484498	0.296862	-0.839618	-0.573696	-0.0421925	0.552018	-0.57475	-0.401683	0.411317	-0.815413	-0.654312	0.341356	-0.999999	0.543992	0.232019	0.507411	0.108037	-0.364428	0.429359	-0.917524	0.56138	-0.792648	-0.686616	-0.605428	0.661525	0.601657	0.454217	0.484642	-0.296862	0.839646	0.573737	0.0422355	-0.552021	0.574782	0.401669	-0.411321	0.815421	0.654357	-0.341359	1	-0.543979	-0.231993	-0.50743	-0.108028	0.364441	-0.429361	0.917531
Glutamine.Glutamate	0.852792	0.431771	0.485571	-0.546763	0.64428	0.409744	0.414212	-0.670031	0.444862	0.650314	-0.624529	0.561575	0.80146	-0.659184	0.543982	-0.999999	-0.603476	-0.800127	-0.592107	0.402144	-0.643203	0.648915	-0.759953	0.480105	0.747286	0.725677	-0.567887	-0.852794	-0.431764	-0.485696	0.546774	-0.644307	-0.409778	-0.414247	0.670025	-0.444934	-0.650332	0.624534	-0.561572	-0.80148	0.659188	-0.543979	1	0.603499	0.800116	0.592123	-0.402153	0.643197	-0.64893
N.Acetylaspartate.Glutamate	0.38932	0.0223478	-0.224791	-0.770094	0.154996	-0.146892	0.725055	-0.372566	0.582354	0.687836	-0.474595	0.413254	0.635835	-0.617304	0.232014	-0.60352	-0.999999	-0.705037	-0.740587	-0.424708	-0.67549	0.198426	-0.456813	0.5855	0.557389	0.510415	-0.499029	-0.389299	-0.0223355	0.224799	0.77011	-0.154905	0.146924	-0.72507	0.372563	-0.582405	-0.687888	0.474596	-0.413239	-0.635844	0.617307	-0.231993	0.603499	1	0.705036	0.740622	0.424718	0.675489	-0.198408
N_Acetylaspartylglutamate.Glutamate	0.764271	0.48614	0.349079	-0.874045	0.605142	0.282482	0.481715	-0.806285	0.537404	0.61257	-0.865296	0.541304	0.700232	-0.941633	0.507453	-0.800114	-0.70501	-1	-0.676308	0.0975736	-0.963914	0.559388	-0.943242	0.594191	0.939086	0.905281	-0.69119	-0.76424	-0.486104	-0.349003	0.874046	-0.605058	-0.282457	-0.481758	0.806283	-0.537457	-0.612561	0.865297	-0.541288	-0.700232	0.941633	-0.50743	0.800116	0.705036	1	0.676356	-0.0975373	0.963912	-0.559377
GSH.Glutamate	0.437075	0.131159	-0.0106532	-0.669219	0.132623	-0.294547	0.752059	-0.325466	0.51478	0.657509	-0.458206	0.305793	0.583862	-0.606278	0.108098	-0.592168	-0.740599	-0.676357	-0.999999	-0.158158	-0.645942	0.102129	-0.534543	0.277298	0.503682	0.340143	-0.645703	-0.437008	-0.131087	0.0108234	0.669223	-0.132473	0.294546	-0.752034	0.325481	-0.514747	-0.657526	0.458208	-0.305777	-0.583875	0.606287	-0.108028	0.592123	0.740622	0.676356	1	0.158176	0.645944	-0.102097
N.Acetylaspartate.Glutamine	-0.503434	-0.443497	-0.821455	-0.243113	-0.554305	-0.635589	0.357879	0.321839	0.144358	0.0652775	0.173882	-0.160963	-0.142997	0.0450008	-0.364431	0.40213	-0.424715	0.0975527	-0.158141	-0.999999	-0.0399101	-0.521005	0.322868	0.0811811	-0.212464	-0.220153	0.112116	0.503451	0.443489	0.821481	0.243123	0.5544	0.635635	-0.357872	-0.321832	-0.144341	-0.0653245	-0.173885	0.160976	0.143027	-0.0450152	0.364441	-0.402153	0.424718	-0.0975373	0.158176	1	0.0399141	0.521018
N_Acetylaspartylglutamate.Glutamine	0.656272	0.471343	0.265176	-0.912403	0.524774	0.209024	0.451549	-0.782635	0.510348	0.543739	-0.870072	0.479985	0.587412	-0.960687	0.429393	-0.64322	-0.675468	-0.963911	-0.645902	-0.0398879	-1	0.459622	-0.910918	0.572918	0.907186	0.873271	-0.671698	-0.656224	-0.471304	-0.265008	0.912404	-0.524636	-0.208986	-0.451593	0.782633	-0.510389	-0.543729	0.870072	-0.479965	-0.58739	0.960687	-0.429361	0.643197	0.675489	0.963912	0.645944	0.0399141	1	-0.459611
Taurine.Glutamine	-0.712251	-0.542837	-0.62787	0.289542	-0.931402	-0.689514	0.0402325	0.651135	-0.501207	-0.325046	0.52028	-0.759142	-0.523579	0.457426	-0.91753	0.648922	0.198437	0.559365	0.102105	-0.521013	0.459608	-0.999999	0.638148	-0.771197	-0.743581	-0.672145	0.674235	0.712268	0.54287	0.62803	-0.289541	0.931408	0.689551	-0.0401851	-0.651138	0.501249	0.325023	-0.520286	0.759148	0.523628	-0.457437	0.917531	-0.64893	-0.198408	-0.559377	-0.102097	0.521018	-0.459611	1
N_Acetylaspartylglutamate.N.Acetylaspartate	0.810917	0.615165	0.555108	-0.748181	0.713427	0.433297	0.288217	-0.865436	0.43045	0.486692	-0.882209	0.521968	0.622134	-0.908728	0.56141	-0.759938	-0.456767	-0.943241	-0.534498	0.322922	-0.910921	0.638154	-1	0.501403	0.940649	0.91596	-0.669989	-0.810883	-0.615108	-0.554998	0.748181	-0.713344	-0.433286	-0.288261	0.865432	-0.430505	-0.486659	0.88221	-0.521953	-0.62213	0.908728	-0.561382	0.759952	0.456812	0.943242	0.534544	-0.32287	0.910919	-0.638149
Taurine.N.Acetylaspartate	-0.466097	-0.284664	-0.132985	0.537827	-0.668255	-0.322367	-0.246977	0.519872	-0.718981	-0.439654	0.494544	-0.767724	-0.520077	0.511522	-0.792629	0.480117	0.585554	0.594149	0.277268	0.0812279	0.572895	-0.771196	0.501379	-0.999999	-0.725003	-0.619548	0.738074	0.466106	0.284718	0.133125	-0.537841	0.668236	0.322368	0.247024	-0.519877	0.719011	0.439667	-0.494547	0.767726	0.520127	-0.511529	0.792635	-0.480091	-0.585517	-0.594176	-0.277289	-0.0812162	-0.572906	0.771195
Taurine.N_Acetylaspartylglutamate	-0.782902	-0.572235	-0.470927	0.775846	-0.771468	-0.432055	-0.301968	0.854542	-0.574528	-0.505854	0.862302	-0.646793	-0.645562	0.885476	-0.686608	0.747279	0.557353	0.939085	0.503626	-0.212488	0.907187	-0.743555	0.940649	-0.725002	-1	-0.93587	0.774206	0.782881	0.572221	0.47091	-0.775847	0.771426	0.432043	0.302015	-0.854541	0.574579	0.505812	-0.862303	0.646782	0.645582	-0.885476	0.686608	-0.747286	-0.557391	-0.939086	-0.503683	0.21246	-0.907186	0.743573
GSH.N_Acetylaspartylglutamate	-0.76578	-0.568649	-0.469934	0.739212	-0.716431	-0.537372	-0.208426	0.878799	-0.407306	-0.446168	0.852354	-0.548074	-0.603182	0.865095	-0.605411	0.725655	0.510382	0.905281	0.340067	-0.22018	0.873273	-0.67213	0.91596	-0.619538	-0.93587	-1	0.542284	0.76578	0.568655	0.469972	-0.739212	0.716423	0.537358	0.208472	-0.878798	0.407357	0.44614	-0.852354	0.548057	0.603182	-0.865095	0.605422	-0.725675	-0.510414	-0.905281	-0.340144	0.220153	-0.873271	0.672138
GSH.Taurine	0.579071	0.402746	0.314121	-0.575565	0.648591	0.133687	0.381672	-0.558915	0.728225	0.507612	-0.586073	0.688835	0.549811	-0.629319	0.661601	-0.56794	-0.499008	-0.69119	-0.645682	0.112145	-0.671716	0.674244	-0.670016	0.738117	0.774254	0.542333	-0.999999	-0.579029	-0.402701	-0.313996	0.57557	-0.648511	-0.133699	-0.381676	0.558937	-0.728174	-0.507575	0.586076	-0.68883	-0.549858	0.629339	-0.661586	0.5679	0.499035	0.691218	0.645676	-0.112124	0.671728	-0.674284
Glucose	0.558725	0.551042	0.658595	-0.108936	0.527665	0.531726	-0.157438	-0.500867	-0.0338278	0.0236754	-0.445598	0.137607	0.323587	-0.319943	0.374414	-0.414832	0.0993359	-0.378131	-0.0714218	0.565246	-0.315352	0.423005	-0.523044	0.0613992	0.434737	0.456396	-0.240182	-0.558695	-0.550917	-0.658405	0.108917	-0.527612	-0.531682	0.157418	0.500885	0.0338041	-0.0235661	0.445596	-0.137593	-0.323573	0.319939	-0.37441	0.414845	-0.0992674	0.378123	0.0714587	-0.565229	0.315345	-0.423027
Adenosine	-0.515966	-0.361248	-0.296259	0.241182	-0.559443	-0.397276	-0.127168	0.4113	-0.408784	-0.495676	0.247172	-0.645367	-0.486539	0.294055	-0.577011	0.482503	0.379905	0.400946	0.203325	-0.153751	0.339697	-0.573603	0.36266	-0.5902	-0.46137	-0.428148	0.443258	0.515968	0.361311	0.296405	-0.241199	0.559462	0.397318	0.127173	-0.411287	0.40879	0.49579	-0.247176	0.645371	0.486565	-0.294087	0.577017	-0.482489	-0.379815	-0.400973	-0.203288	0.153815	-0.339704	0.573634
Cytidine	0.487128	0.387858	0.447726	-0.269194	0.422635	0.290047	0.0502081	-0.457991	0.118147	0.161313	-0.450514	0.185957	0.399658	-0.369704	0.346562	-0.440812	-0.107002	-0.447064	-0.278386	0.368019	-0.391644	0.366869	-0.519518	0.150273	0.460361	0.429423	-0.349417	-0.48709	-0.387786	-0.447573	0.269185	-0.422497	-0.290007	-0.0502089	0.45801	-0.118161	-0.161232	0.450516	-0.185944	-0.399639	0.369711	-0.34652	0.440832	0.107071	0.447053	0.278398	-0.367998	0.391638	-0.366831
Hypoxanthine	0.482231	0.240507	0.210888	-0.466358	0.38012	0.18673	0.311147	-0.446466	0.341753	0.403482	-0.453331	0.355591	0.537858	-0.464568	0.377528	-0.558999	-0.444222	-0.566894	-0.411411	0.109807	-0.499311	0.384859	-0.518749	0.371675	0.533477	0.521957	-0.399952	-0.482219	-0.240459	-0.2109	0.466351	-0.380026	-0.186705	-0.311158	0.44647	-0.34176	-0.403479	0.453327	-0.355565	-0.537814	0.464558	-0.37751	0.55901	0.444216	0.566885	0.411431	-0.109833	0.499306	-0.384841
Inosine	0.542015	0.248634	0.216882	-0.578058	0.39932	0.131426	0.424191	-0.493828	0.421236	0.49447	-0.532275	0.389193	0.628189	-0.563568	0.39359	-0.65247	-0.532567	-0.676334	-0.55981	0.114986	-0.604214	0.402381	-0.618922	0.393708	0.616803	0.575969	-0.500934	-0.541978	-0.248554	-0.216784	0.578054	-0.399177	-0.131386	-0.424199	0.49384	-0.421239	-0.49443	0.532272	-0.38916	-0.628171	0.563559	-0.393529	0.652478	0.532585	0.676328	0.559834	-0.114957	0.60421	-0.402344
Ribothymidine	0.559877	0.400065	0.361704	-0.511789	0.457036	0.300665	0.21096	-0.588838	0.253113	0.331106	-0.599441	0.310227	0.504282	-0.586442	0.392539	-0.553277	-0.345015	-0.644532	-0.382262	0.205635	-0.609213	0.412062	-0.664337	0.313133	0.617662	0.630001	-0.406343	-0.559853	-0.400009	-0.361586	0.51179	-0.456922	-0.300626	-0.21096	0.588867	-0.253112	-0.331041	0.599442	-0.310219	-0.504271	0.586438	-0.392487	0.553291	0.345054	0.644528	0.382298	-0.205615	0.609213	-0.412047
Glutamate	-0.376315	-0.188512	-0.0183306	0.347301	-0.262814	-0.0636013	-0.435209	0.227945	-0.447588	-0.559491	0.210578	-0.467104	-0.366652	0.359613	-0.224689	0.427271	0.583648	0.397671	0.466092	0.154039	0.360304	-0.256883	0.258752	-0.454994	-0.33116	-0.27101	0.388987	0.376326	0.188595	0.0185108	-0.347338	0.262901	0.0636537	0.435196	-0.227933	0.447577	0.559635	-0.210583	0.467106	0.366683	-0.359641	0.224691	-0.427267	-0.583601	-0.397701	-0.466058	-0.153995	-0.36031	0.256879
Glutamyl_L_hydroxyproline	0.581778	0.403237	0.368063	-0.521916	0.493359	0.318721	0.212863	-0.604106	0.286691	0.35288	-0.609585	0.357087	0.543298	-0.585213	0.44545	-0.576156	-0.371673	-0.659661	-0.393008	0.214401	-0.617551	0.456204	-0.67244	0.368927	0.643318	0.643882	-0.447507	-0.58176	-0.403201	-0.367961	0.52192	-0.493263	-0.31868	-0.212859	0.60412	-0.286699	-0.352834	0.609592	-0.357058	-0.543309	0.585216	-0.44544	0.576161	0.371727	0.659668	0.393037	-0.214385	0.617549	-0.456209
N_Acetylaspartylglutamate	0.655825	0.460278	0.417769	-0.713408	0.558782	0.343953	0.254604	-0.757269	0.338149	0.406989	-0.787709	0.399749	0.613614	-0.773382	0.495684	-0.657381	-0.428057	-0.834429	-0.465753	0.238163	-0.8125	0.515022	-0.863831	0.414112	0.812434	0.815774	-0.53961	-0.655789	-0.460188	-0.417555	0.713408	-0.558651	-0.343915	-0.254636	0.757269	-0.338191	-0.406928	0.787711	-0.399729	-0.61359	0.773382	-0.49565	0.657387	0.428099	0.834429	0.465781	-0.238096	0.812498	-0.515016
Threonate	0.483067	0.241655	0.212103	-0.466837	0.380803	0.186961	0.311236	-0.447165	0.341862	0.403798	-0.454086	0.355905	0.538286	-0.465395	0.377887	-0.559486	-0.4439	-0.567541	-0.411752	0.110683	-0.500119	0.385197	-0.519972	0.371431	0.534095	0.522406	-0.400333	-0.483055	-0.241607	-0.212115	0.46683	-0.380708	-0.186936	-0.311247	0.44717	-0.341869	-0.403795	0.454082	-0.355879	-0.538239	0.465386	-0.377869	0.559497	0.443894	0.567532	0.411773	-0.110709	0.500114	-0.385179
Glycerylphosphorylethanolamine	0.456206	0.335285	0.409338	-0.268583	0.330566	0.235133	0.110106	-0.401281	0.0792176	0.243158	-0.369488	0.160213	0.430922	-0.33639	0.265437	-0.44697	-0.111877	-0.432349	-0.300313	0.356365	-0.370701	0.267041	-0.498025	0.0302867	0.398638	0.39522	-0.257272	-0.456163	-0.335178	-0.409152	0.268574	-0.330439	-0.235084	-0.110115	0.401295	-0.0792269	-0.243071	0.369485	-0.160192	-0.430878	0.336384	-0.265415	0.446985	0.111932	0.432344	0.300331	-0.356327	0.370697	-0.267007
Docosahexaenoic_Acid.Oleic_Acid	-0.416944	-0.280462	-0.282707	0.255944	-0.381626	-0.241492	-0.137649	0.355647	-0.246001	-0.351122	0.282016	-0.381911	-0.423026	0.291322	-0.386705	0.412425	0.239274	0.374446	0.240207	-0.195521	0.330964	-0.372145	0.386002	-0.295753	-0.389767	-0.368556	0.336641	0.416957	0.280523	0.28269	-0.255962	0.381714	0.241504	0.137696	-0.355634	0.246066	0.351107	-0.282008	0.381925	0.422991	-0.29135	0.386685	-0.412454	-0.239218	-0.374444	-0.240159	0.19554	-0.330974	0.372193
Oleic_Acid.Docosahexaenoic_Acid	0.416925	0.280437	0.282686	-0.255968	0.381636	0.241478	0.137665	-0.355637	0.24604	0.351128	-0.282019	0.381941	0.423032	-0.291339	0.386737	-0.412418	-0.239278	-0.374467	-0.240196	0.195507	-0.330984	0.372177	-0.386018	0.295799	0.389793	0.368575	-0.336672	-0.416938	-0.280498	-0.282669	0.255986	-0.381724	-0.24149	-0.137711	0.355624	-0.246105	-0.351114	0.282012	-0.381956	-0.422996	0.291367	-0.386717	0.412447	0.239222	0.374465	0.240147	-0.195526	0.330993	-0.372225
[truncated: 18 more columns]

## Sheet: ROI 7 KO corr matrix
Entity	Glucose.Glutamate	Glucose.Glutamine	Glucose.Acetylaspartate	Glucose.N_Acetylaspartylglutamate	Glucose.Taurine	Glucose.GSH	Citric_Acid.Glutamate	Citrate.N_Acetylaspartylglutamate	Citrate.Taurine	Malate.Glutamate	Malate.N_Acetylaspartylglutamate	Malate.Taurine	Aspartate.Glutamate	Aspartate.N_Acetylaspartylglutamate	Aspartate.Taurine	Glutamate.Glutamine	Glutamate.N.Acetylaspartate	Glutamate.N_Acetylaspartylglutamate	Glutamate.GSH	Glutamine.N.Acetylaspartate	Glutamine.N_Acetylaspartylglutamate	Glutamine.Taurine	N.Acetylaspartate.N_Acetylaspartylglutamate	N.Acetylaspartate.Taurine	N_Acetylaspartylglutamate.Taurine	N_Acetylaspartylglutamate.GSH	Taurine.GSH	Glutamate.Glucose	Glutamine.Glucose	N.Acetylaspartate.Glucose	N_Acetylaspartylglutamate..Glucose	Taurine.Glucose	GSH.Glucose	Glutamate.Citric_Acid	N_Acetylaspartylglutamate.Citric_Acid	Taurine.Citric_Acid	Glutamate.Malic_Acid	N_Acetylaspartylglutamate.Malic_Acid	Taurine.Malic_Acid	Glutamate.Aspartic_Acid	N_Acetylaspartylglutamate.Aspartic_Acid	Taurine._Aspartic_Acid	Glutamine.Glutamate	N.Acetylaspartate.Glutamate	N_Acetylaspartylglutamate.Glutamate	GSH.Glutamate	N.Acetylaspartate.Glutamine	N_Acetylaspartylglutamate.Glutamine	Taurine.Glutamine
Glucose.Glutamate	1	0.780941	0.83091	-0.501185	0.86471	0.699995	0.13219	-0.737052	0.399007	0.561679	-0.710802	0.66201	0.745751	-0.718129	0.626816	-0.640906	-0.339243	-0.811487	-0.548409	0.386859	-0.736061	0.732897	-0.837093	0.517902	0.809623	0.776127	-0.622751	-1	-0.780942	-0.830916	0.501187	-0.864716	-0.700003	-0.1322	0.737053	-0.39902	-0.561683	0.7108	-0.662016	-0.745763	0.718131	-0.626819	0.640903	0.339248	0.811489	0.548408	-0.386864	0.736064	-0.732909
Glucose.Glutamine	0.780941	1	0.849474	-0.28526	0.849205	0.650262	-0.315049	-0.741916	0.0704459	0.157723	-0.633503	0.496367	0.61393	-0.464088	0.717906	-0.0555116	0.0390751	-0.568656	-0.308447	0.123307	-0.65405	0.52344	-0.681353	0.462284	0.672884	0.571619	-0.652126	-0.780941	-0.999999	-0.849473	0.285255	-0.849206	-0.650267	0.315037	0.741922	-0.070451	-0.157732	0.633504	-0.496382	-0.613938	0.464083	-0.717911	0.0555153	-0.0390724	0.568658	0.308445	-0.123312	0.654057	-0.523453
Glucose.Acetylaspartate	0.83091	0.849474	1	-0.143195	0.854375	0.789127	-0.229034	-0.628366	0.115478	0.224857	-0.518692	0.505711	0.569231	-0.40024	0.650338	-0.298266	0.181994	-0.499054	-0.212844	0.587286	-0.488593	0.652044	-0.653234	0.287892	0.594644	0.53384	-0.513088	-0.830911	-0.849474	-1	0.143197	-0.854375	-0.789136	0.229026	0.628362	-0.115488	-0.224851	0.518696	-0.505723	-0.569244	0.400244	-0.650342	0.298263	-0.18199	0.499061	0.212832	-0.587291	0.488605	-0.652051
Glucose.N_Acetylaspartylglutamate	-0.501185	-0.28526	-0.143195	1	-0.412174	-0.102486	-0.314331	0.688546	-0.451534	-0.465229	0.813826	-0.438796	-0.524232	0.892684	-0.370442	0.464176	0.677455	0.890513	0.610389	0.192729	0.886881	-0.420627	0.802547	-0.598969	-0.817592	-0.824793	0.544977	0.501174	0.285272	0.143184	-1	0.412158	0.10247	0.314337	-0.688552	0.451544	0.465214	-0.813828	0.438778	0.524223	-0.892685	0.370435	-0.464194	-0.677455	-0.890512	-0.610404	-0.192737	-0.886879	0.420617
Glucose.Taurine	0.86471	0.849205	0.854375	-0.412174	1	0.751052	-0.157636	-0.770574	0.367268	0.343391	-0.683786	0.757748	0.699853	-0.581194	0.869422	-0.356439	-0.0940903	-0.691284	-0.323981	0.320357	-0.693366	0.882638	-0.783686	0.713503	0.823838	0.726282	-0.757868	-0.86471	-0.849205	-0.854382	0.412173	-1	-0.751054	0.157628	0.770578	-0.367285	-0.343383	0.683794	-0.757763	-0.699863	0.58119	-0.869424	0.356445	0.0940871	0.691288	0.323983	-0.320358	0.693378	-0.882639
Glucose.GSH	0.699995	0.650262	0.789127	-0.102486	0.751052	1	-0.259998	-0.524523	0.0653542	0.163316	-0.423445	0.45084	0.433316	-0.345592	0.550472	-0.321982	0.0816792	-0.404507	0.139202	0.481356	-0.364399	0.65572	-0.503936	0.351394	0.491742	0.57538	-0.203736	-0.699995	-0.650258	-0.789129	0.10249	-0.751054	-1	0.259986	0.52451	-0.0653783	-0.163307	0.42345	-0.450861	-0.433321	0.345592	-0.550478	0.321982	-0.0816804	0.404514	-0.139201	-0.481359	0.364407	-0.655723
Citric_Acid.Glutamate	0.13219	-0.315049	-0.229034	-0.314331	-0.157636	-0.259998	1	0.262487	0.741999	0.63471	0.0158596	0.189414	0.115247	-0.292312	-0.242139	-0.613895	-0.614769	-0.267285	-0.513879	0.0444922	-0.102351	0.0185021	-0.10229	0.0167547	0.0864944	0.105561	-0.0145071	-0.132182	0.315069	0.22904	0.314338	0.157641	0.260004	-1	-0.262486	-0.741998	-0.63471	-0.0158658	-0.189394	-0.115241	0.29232	0.24215	0.61389	0.614768	0.267284	0.513883	-0.0444846	0.102343	-0.0184905
Citrate.N_Acetylaspartylglutamate	-0.737052	-0.741916	-0.628366	0.688546	-0.770574	-0.524523	0.262487	1	-0.0767696	-0.224829	0.897676	-0.487633	-0.614998	0.766191	-0.66228	0.278679	0.247534	0.823607	0.397071	-0.0645564	0.877879	-0.613239	0.885773	-0.606594	-0.884671	-0.857728	0.661915	0.737049	0.741918	0.628364	-0.688547	0.770573	0.524522	-0.262489	-1	0.0767718	0.224817	-0.897676	0.487637	0.615004	-0.76619	0.662285	-0.278693	-0.24754	-0.823607	-0.39708	0.064557	-0.877879	0.613247
Citrate.Taurine	0.399007	0.0704459	0.115478	-0.451534	0.367268	0.0653542	0.741999	-0.0767696	1	0.667099	-0.248135	0.663542	0.427845	-0.439047	0.340624	-0.563894	-0.494325	-0.490249	-0.515324	0.0947646	-0.384719	0.538493	-0.400514	0.54063	0.478278	0.387195	-0.495194	-0.399	-0.0704367	-0.115473	0.451543	-0.367256	-0.0653442	-0.741998	0.0767788	-1	-0.667099	0.248139	-0.663541	-0.427846	0.439052	-0.340617	0.563896	0.494316	0.490256	0.515326	-0.0947557	0.384724	-0.538488
Malate.Glutamate	0.561679	0.157723	0.224857	-0.465229	0.343391	0.163316	0.63471	-0.224829	0.667099	1	-0.190318	0.735435	0.5791	-0.483365	0.267042	-0.708964	-0.592441	-0.563296	-0.627675	0.155102	-0.422448	0.427912	-0.455883	0.358726	0.453296	0.435527	-0.36862	-0.561675	-0.157708	-0.224856	0.465238	-0.343379	-0.163323	-0.634699	0.224827	-0.667087	-1	0.190323	-0.735427	-0.579101	0.483377	-0.267039	0.708955	0.592447	0.563307	0.627666	-0.155106	0.422447	-0.427913
Malate.N_Acetylaspartylglutamate	-0.710802	-0.633503	-0.518692	0.813826	-0.683786	-0.423445	0.0158596	0.897676	-0.248135	-0.190318	1	-0.36569	-0.562047	0.882691	-0.545045	0.370365	0.394726	0.898768	0.491647	-0.0295021	0.929963	-0.561048	0.918295	-0.589322	-0.90869	-0.893463	0.641182	0.710793	0.633498	0.518674	-0.813826	0.683779	0.423434	-0.0158503	-0.89768	0.24815	0.190315	-1	0.365697	0.562049	-0.882692	0.545042	-0.370386	-0.394725	-0.898767	-0.491666	0.0294926	-0.929962	0.56105
Malate.Taurine	0.66201	0.496367	0.505711	-0.438796	0.757748	0.45084	0.189414	-0.487633	0.663542	0.735435	-0.36569	1	0.705882	-0.468551	0.756786	-0.452767	-0.295355	-0.597989	-0.422958	0.168083	-0.552448	0.806526	-0.597395	0.749638	0.683234	0.575158	-0.702389	-0.662011	-0.496373	-0.505731	0.438804	-0.757752	-0.450853	-0.189405	0.48764	-0.66354	-0.735435	0.365707	-1	-0.705888	0.468555	-0.756793	0.452762	0.295352	0.598002	0.422944	-0.16809	0.552459	-0.806532
Aspartate.Glutamate	0.745751	0.61393	0.569231	-0.524232	0.699853	0.433316	0.115247	-0.614998	0.427845	0.5791	-0.562047	0.705882	1	-0.483888	0.790087	-0.443497	-0.320807	-0.697439	-0.544617	0.13422	-0.676594	0.60251	-0.701194	0.567853	0.716244	0.631724	-0.654841	-0.745752	-0.61393	-0.569245	0.524236	-0.699857	-0.433322	-0.115255	0.615009	-0.42786	-0.579105	0.562054	-0.705888	-1	0.483893	-0.790084	0.443493	0.320808	0.697442	0.544611	-0.13423	0.676605	-0.602511
Aspartate.N_Acetylaspartylglutamate	-0.718129	-0.464088	-0.40024	0.892684	-0.581194	-0.345592	-0.292312	0.766191	-0.439047	-0.483365	0.882691	-0.468551	-0.483888	1	-0.36134	0.583809	0.599913	0.952118	0.612947	-0.0467547	0.908181	-0.541306	0.899131	-0.552081	-0.87861	-0.899593	0.560823	0.718117	0.464075	0.400216	-0.892684	0.581177	0.345578	0.292319	-0.766196	0.439055	0.483352	-0.882691	0.468534	0.48389	-1	0.361339	-0.58383	-0.599914	-0.952118	-0.612964	0.0467415	-0.90818	0.541305
Aspartate.Taurine	0.626816	0.717906	0.650338	-0.370442	0.869422	0.550472	-0.242139	-0.66228	0.340624	0.267042	-0.545045	0.756786	0.790087	-0.36134	1	-0.141491	-0.0164588	-0.542808	-0.24437	0.127534	-0.599875	0.785509	-0.63367	0.755752	0.716673	0.576861	-0.772356	-0.626816	-0.717909	-0.650352	0.37044	-0.869425	-0.550472	0.242135	0.662292	-0.340643	-0.267031	0.545061	-0.7568	-0.79009	0.361338	-1	0.141497	0.0164554	0.54281	0.244371	-0.127536	0.599894	-0.785508
Glutamate.Glutamine	-0.640906	-0.0555116	-0.298266	0.464176	-0.356439	-0.321982	-0.613895	0.278679	-0.563894	-0.708964	0.370365	-0.452767	-0.443497	0.583809	-0.141491	1	0.622559	0.605945	0.510235	-0.467742	0.379459	-0.54458	0.508325	-0.28117	-0.476282	-0.546494	0.209521	0.640906	0.0554982	0.298288	-0.464187	0.356443	0.321991	0.613902	-0.278676	0.563909	0.708962	-0.370364	0.452754	0.443502	-0.583821	0.141488	-1	-0.622564	-0.605949	-0.510237	0.467747	-0.379457	0.544578
Glutamate.N.Acetylaspartate	-0.339243	0.0390751	0.181994	0.677455	-0.0940903	0.0816792	-0.614769	0.247534	-0.494325	-0.592441	0.394726	-0.295355	-0.320807	0.599913	-0.0164588	0.622559	1	0.581679	0.60824	0.330376	0.475805	-0.199966	0.364944	-0.465274	-0.420241	-0.46393	0.247269	0.339237	-0.039069	-0.181994	-0.677456	0.0940788	-0.0816841	0.614774	-0.247545	0.494326	0.59245	-0.394724	0.295336	0.320805	-0.599914	0.0164532	-0.622554	-1	-0.581675	-0.60825	-0.330377	-0.4758	0.199963
Glutamate.N_Acetylaspartylglutamate	-0.811487	-0.568656	-0.499054	0.890513	-0.691284	-0.404507	-0.267285	0.823607	-0.490249	-0.563296	0.898768	-0.597989	-0.697439	0.952118	-0.542808	0.605945	0.581679	1	0.669957	-0.0749112	0.957362	-0.630015	0.959502	-0.6315	-0.950395	-0.935573	0.668371	0.811477	0.568647	0.499042	-0.890512	0.691272	0.404496	0.267293	-0.823612	0.49026	0.563282	-0.898768	0.597976	0.697438	-0.952119	0.542803	-0.605967	-0.581679	-1	-0.669974	0.0749036	-0.95736	0.630015
Glutamate.GSH	-0.548409	-0.308447	-0.212844	0.610389	-0.323981	0.139202	-0.513879	0.397071	-0.515324	-0.627675	0.491647	-0.422958	-0.544617	0.612947	-0.24437	0.510235	0.60824	0.669957	1	0.0449476	0.616429	-0.266356	0.573286	-0.349599	-0.55285	-0.401376	0.656968	0.548391	0.308424	0.212822	-0.610389	0.32396	-0.139201	0.513874	-0.397091	0.51531	0.627689	-0.491648	0.422942	0.544624	-0.612949	0.244366	-0.510232	-0.60824	-0.669957	-1	-0.0449543	-0.616425	0.26636
Glutamine.N.Acetylaspartate	0.386859	0.123307	0.587286	0.192729	0.320357	0.481356	0.0444922	-0.0645564	0.0947646	0.155102	-0.0295021	0.168083	0.13422	-0.0467547	0.127534	-0.467742	0.330376	-0.0749112	0.0449476	1	0.067865	0.414039	-0.20353	-0.196359	0.0977538	0.120319	0.00654539	-0.386865	-0.123288	-0.58729	-0.192724	-0.320374	-0.481365	-0.0444907	0.0645392	-0.094779	-0.155083	0.0295023	-0.168089	-0.134231	0.0467687	-0.127539	0.467741	-0.330376	0.0749151	-0.0449602	-1	-0.0678623	-0.414037
Glutamine.N_Acetylaspartylglutamate	-0.736061	-0.65405	-0.488593	0.886881	-0.693366	-0.364399	-0.102351	0.877879	-0.384719	-0.422448	0.929963	-0.552448	-0.676594	0.908181	-0.599875	0.379459	0.475805	0.957362	0.616429	0.067865	1	-0.558621	0.949924	-0.651934	-0.952477	-0.906549	0.722157	0.736048	0.654043	0.488568	-0.88688	0.69335	0.364383	0.102361	-0.877883	0.384729	0.422434	-0.929964	0.552437	0.676591	-0.908182	0.59987	-0.379474	-0.475805	-0.957362	-0.616444	-0.0678723	-1	0.558624
Glutamine.Taurine	0.732897	0.52344	0.652044	-0.420627	0.882638	0.65572	0.0185021	-0.613239	0.538493	0.427912	-0.561048	0.806526	0.60251	-0.541306	0.785509	-0.54458	-0.199966	-0.630015	-0.266356	0.414039	-0.558621	1	-0.679287	0.771701	0.755535	0.683472	-0.673035	-0.732902	-0.523443	-0.652066	0.420629	-0.882638	-0.655723	-0.0185043	0.613242	-0.538513	-0.427893	0.561061	-0.806534	-0.602517	0.541307	-0.785511	0.544583	0.199961	0.630019	0.266356	-0.414041	0.558635	-1
N.Acetylaspartate.N_Acetylaspartylglutamate	-0.837093	-0.681353	-0.653234	0.802547	-0.783686	-0.503936	-0.10229	0.885773	-0.400514	-0.455883	0.918295	-0.597395	-0.701194	0.899131	-0.63367	0.508325	0.364944	0.959502	0.573286	-0.20353	0.949924	-0.679287	1	-0.583898	-0.965483	-0.935089	0.700942	0.837084	0.681345	0.65322	-0.802547	0.783676	0.503928	0.102298	-0.885776	0.400527	0.455863	-0.918296	0.597386	0.701194	-0.899132	0.633666	-0.508347	-0.364948	-0.959502	-0.573301	0.20352	-0.949923	0.679286
N.Acetylaspartate.Taurine	0.517902	0.462284	0.287892	-0.598969	0.713503	0.351394	0.0167547	-0.606594	0.54063	0.358726	-0.589322	0.749638	0.567853	-0.552081	0.755752	-0.28117	-0.465274	-0.6315	-0.349599	-0.196359	-0.651934	0.771701	-0.583898	1	0.750016	0.644641	-0.749327	-0.517905	-0.462305	-0.287913	0.598969	-0.713501	-0.351387	-0.0167566	0.606607	-0.540642	-0.358722	0.589335	-0.749646	-0.567853	0.552075	-0.755753	0.281176	0.465262	0.631502	0.34961	0.196356	0.651946	-0.771699
N_Acetylaspartylglutamate.Taurine	0.809623	0.672884	0.594644	-0.817592	0.823838	0.491742	0.0864944	-0.884671	0.478278	0.453296	-0.90869	0.683234	0.716244	-0.87861	0.716673	-0.476282	-0.420241	-0.950395	-0.55285	0.0977538	-0.952477	0.755535	-0.965483	0.750016	1	0.93752	-0.777861	-0.809615	-0.672881	-0.59464	0.817591	-0.823834	-0.491733	-0.0865025	0.884674	-0.478293	-0.453276	0.908691	-0.683227	-0.716245	0.878611	-0.716672	0.476302	0.420243	0.950395	0.552867	-0.0977485	0.952476	-0.755536
N_Acetylaspartylglutamate.GSH	0.776127	0.571619	0.53384	-0.824793	0.726282	0.57538	0.105561	-0.857728	0.387195	0.435527	-0.893463	0.575158	0.631724	-0.899593	0.576861	-0.546494	-0.46393	-0.935573	-0.401376	0.120319	-0.906549	0.683472	-0.935089	0.644641	0.93752	1	-0.542547	-0.776121	-0.571627	-0.533844	0.824793	-0.72628	-0.575374	-0.105569	0.85773	-0.387207	-0.435509	0.893463	-0.575148	-0.631718	0.899594	-0.57686	0.546518	0.463933	0.935573	0.401394	-0.120316	0.906547	-0.683469
Taurine.GSH	-0.622751	-0.652126	-0.513088	0.544977	-0.757868	-0.203736	-0.0145071	0.661915	-0.495194	-0.36862	0.641182	-0.702389	-0.654841	0.560823	-0.772356	0.209521	0.247269	0.668371	0.656968	0.00654539	0.722157	-0.673035	0.700942	-0.749327	-0.777861	-0.542547	1	0.62274	0.652119	0.513071	-0.544975	0.75786	0.203741	0.0145063	-0.661937	0.495191	0.368625	-0.641195	0.702389	0.654849	-0.56082	0.772359	-0.209525	-0.247267	-0.668374	-0.656964	-0.00655375	-0.722171	0.673048
Glutamate.Glucose	-1	-0.780941	-0.830911	0.501174	-0.86471	-0.699995	-0.132182	0.737049	-0.399	-0.561675	0.710793	-0.662011	-0.745752	0.718117	-0.626816	0.640906	0.339237	0.811477	0.548391	-0.386865	0.736048	-0.732902	0.837084	-0.517905	-0.809615	-0.776121	0.62274	1	0.780941	0.830917	-0.501175	0.864717	0.700003	0.132193	-0.73705	0.399013	0.56168	-0.710791	0.662016	0.745764	-0.718118	0.626819	-0.640904	-0.339242	-0.81148	-0.548391	0.38687	-0.736051	0.732914
Glutamine.Glucose	-0.780942	-0.999999	-0.849474	0.285272	-0.849205	-0.650258	0.315069	0.741918	-0.0704367	-0.157708	0.633498	-0.496373	-0.61393	0.464075	-0.717909	0.0554982	-0.039069	0.568647	0.308424	-0.123288	0.654043	-0.523443	0.681345	-0.462305	-0.672881	-0.571627	0.652119	0.780941	1	0.849473	-0.285267	0.849206	0.650263	-0.315057	-0.741924	0.0704418	0.157717	-0.633498	0.496388	0.613938	-0.46407	0.717914	-0.0555019	0.0390663	-0.56865	-0.308422	0.123294	-0.65405	0.523455
N.Acetylaspartate.Glucose	-0.830916	-0.849473	-1	0.143184	-0.854382	-0.789129	0.22904	0.628364	-0.115473	-0.224856	0.518674	-0.505731	-0.569245	0.400216	-0.650352	0.298288	-0.181994	0.499042	0.212822	-0.58729	0.488568	-0.652066	0.65322	-0.287913	-0.59464	-0.533844	0.513071	0.830917	0.849473	1	-0.143186	0.854383	0.789138	-0.229032	-0.62836	0.115483	0.224849	-0.518678	0.505744	0.569258	-0.40022	0.650356	-0.298286	0.18199	-0.499048	-0.21281	0.587295	-0.48858	0.652074
N_Acetylaspartylglutamate..Glucose	0.501187	0.285255	0.143197	-1	0.412173	0.10249	0.314338	-0.688547	0.451543	0.465238	-0.813826	0.438804	0.524236	-0.892684	0.37044	-0.464187	-0.677456	-0.890512	-0.610389	-0.192724	-0.88688	0.420629	-0.802547	0.598969	0.817591	0.824793	-0.544975	-0.501175	-0.285267	-0.143186	1	-0.412156	-0.102474	-0.314344	0.688553	-0.451553	-0.465223	0.813828	-0.438785	-0.524227	0.892685	-0.370433	0.464205	0.677455	0.890512	0.610404	0.192732	0.886879	-0.420619
Taurine.Glucose	-0.864716	-0.849206	-0.854375	0.412158	-1	-0.751054	0.157641	0.770573	-0.367256	-0.343379	0.683779	-0.757752	-0.699857	0.581177	-0.869425	0.356443	0.0940788	0.691272	0.32396	-0.320374	0.69335	-0.882638	0.783676	-0.713501	-0.823834	-0.72628	0.75786	0.864717	0.849206	0.854383	-0.412156	1	0.751056	-0.157633	-0.770577	0.367273	0.34337	-0.683787	0.757766	0.699867	-0.581173	0.869427	-0.356448	-0.0940756	-0.691277	-0.323963	0.320375	-0.693362	0.882639
GSH.Glucose	-0.700003	-0.650267	-0.789136	0.10247	-0.751054	-1	0.260004	0.524522	-0.0653442	-0.163323	0.423434	-0.450853	-0.433322	0.345578	-0.550472	0.321991	-0.0816841	0.404496	-0.139201	-0.481365	0.364383	-0.655723	0.503928	-0.351387	-0.491733	-0.575374	0.203741	0.700003	0.650263	0.789138	-0.102474	0.751056	1	-0.259991	-0.524509	0.0653683	0.163314	-0.423439	0.450874	0.433326	-0.345578	0.550479	-0.321991	0.0816853	-0.404502	0.139199	0.481369	-0.364392	0.655726
Glutamate.Citric_Acid	-0.1322	0.315037	0.229026	0.314337	0.157628	0.259986	-1	-0.262489	-0.741998	-0.634699	-0.0158503	-0.189405	-0.115255	0.292319	0.242135	0.613902	0.614774	0.267293	0.513874	-0.0444907	0.102361	-0.0185043	0.102298	-0.0167566	-0.0865025	-0.105569	0.0145063	0.132193	-0.315057	-0.229032	-0.314344	-0.157633	-0.259991	1	0.262488	0.741998	0.634699	0.0158566	0.189386	0.115249	-0.292327	-0.242146	-0.613897	-0.614772	-0.267292	-0.513879	0.0444831	-0.102353	0.0184928
N_Acetylaspartylglutamate.Citric_Acid	0.737053	0.741922	0.628362	-0.688552	0.770578	0.52451	-0.262486	-1	0.0767788	0.224827	-0.89768	0.48764	0.615009	-0.766196	0.662292	-0.278676	-0.247545	-0.823612	-0.397091	0.0645392	-0.877883	0.613242	-0.885776	0.606607	0.884674	0.85773	-0.661937	-0.73705	-0.741924	-0.62836	0.688553	-0.770577	-0.524509	0.262488	1	-0.0767809	-0.224815	0.89768	-0.487643	-0.615014	0.766195	-0.662296	0.278689	0.247551	0.823612	0.3971	-0.0645397	0.877883	-0.61325
Taurine.Citric_Acid	-0.39902	-0.070451	-0.115488	0.451544	-0.367285	-0.0653783	-0.741998	0.0767718	-1	-0.667087	0.24815	-0.66354	-0.42786	0.439055	-0.340643	0.563909	0.494326	0.49026	0.51531	-0.094779	0.384729	-0.538513	0.400527	-0.540642	-0.478293	-0.387207	0.495191	0.399013	0.0704418	0.115483	-0.451553	0.367273	0.0653683	0.741998	-0.0767809	1	0.667088	-0.248154	0.663539	0.427861	-0.439061	0.340635	-0.563912	-0.494318	-0.490267	-0.515313	0.09477	-0.384733	0.538508
Glutamate.Malic_Acid	-0.561683	-0.157732	-0.224851	0.465214	-0.343383	-0.163307	-0.63471	0.224817	-0.667099	-1	0.190315	-0.735435	-0.579105	0.483352	-0.267031	0.708962	0.59245	0.563282	0.627689	-0.155083	0.422434	-0.427893	0.455863	-0.358722	-0.453276	-0.435509	0.368625	0.56168	0.157717	0.224849	-0.465223	0.34337	0.163314	0.634699	-0.224815	0.667088	1	-0.19032	0.735427	0.579107	-0.483365	0.267028	-0.708952	-0.592456	-0.563293	-0.62768	0.155086	-0.422433	0.427894
N_Acetylaspartylglutamate.Malic_Acid	0.7108	0.633504	0.518696	-0.813828	0.683794	0.42345	-0.0158658	-0.897676	0.248139	0.190323	-1	0.365707	0.562054	-0.882691	0.545061	-0.370364	-0.394724	-0.898768	-0.491648	0.0295023	-0.929964	0.561061	-0.918296	0.589335	0.908691	0.893463	-0.641195	-0.710791	-0.633498	-0.518678	0.813828	-0.683787	-0.423439	0.0158566	0.89768	-0.248154	-0.19032	1	-0.365714	-0.562055	0.882692	-0.545058	0.370385	0.394723	0.898768	0.491667	-0.0294928	0.929962	-0.561063
Taurine.Malic_Acid	-0.662016	-0.496382	-0.505723	0.438778	-0.757763	-0.450861	-0.189394	0.487637	-0.663541	-0.735427	0.365697	-1	-0.705888	0.468534	-0.7568	0.452754	0.295336	0.597976	0.422942	-0.168089	0.552437	-0.806534	0.597386	-0.749646	-0.683227	-0.575148	0.702389	0.662016	0.496388	0.505744	-0.438785	0.757766	0.450874	0.189386	-0.487643	0.663539	0.735427	-0.365714	1	0.705894	-0.468538	0.756807	-0.452748	-0.295333	-0.597988	-0.422928	0.168096	-0.552449	0.80654
Glutamate.Aspartic_Acid	-0.745763	-0.613938	-0.569244	0.524223	-0.699863	-0.433321	-0.115241	0.615004	-0.427846	-0.579101	0.562049	-0.705888	-1	0.48389	-0.79009	0.443502	0.320805	0.697438	0.544624	-0.134231	0.676591	-0.602517	0.701194	-0.567853	-0.716245	-0.631718	0.654849	0.745764	0.613938	0.569258	-0.524227	0.699867	0.433326	0.115249	-0.615014	0.427861	0.579107	-0.562055	0.705894	1	-0.483895	0.790088	-0.443498	-0.320806	-0.697441	-0.544619	0.134242	-0.676603	0.602519
N_Acetylaspartylglutamate.Aspartic_Acid	0.718131	0.464083	0.400244	-0.892685	0.58119	0.345592	0.29232	-0.76619	0.439052	0.483377	-0.882692	0.468555	0.483893	-1	0.361338	-0.583821	-0.599914	-0.952119	-0.612949	0.0467687	-0.908182	0.541307	-0.899132	0.552075	0.878611	0.899594	-0.56082	-0.718118	-0.46407	-0.40022	0.892685	-0.581173	-0.345578	-0.292327	0.766195	-0.439061	-0.483365	0.882692	-0.468538	-0.483895	1	-0.361337	0.583842	0.599914	0.952119	0.612966	-0.0467555	0.908181	-0.541305
Taurine._Aspartic_Acid	-0.626819	-0.717911	-0.650342	0.370435	-0.869424	-0.550478	0.24215	0.662285	-0.340617	-0.267039	0.545042	-0.756793	-0.790084	0.361339	-1	0.141488	0.0164532	0.542803	0.244366	-0.127539	0.59987	-0.785511	0.633666	-0.755753	-0.716672	-0.57686	0.772359	0.626819	0.717914	0.650356	-0.370433	0.869427	0.550479	-0.242146	-0.662296	0.340635	0.267028	-0.545058	0.756807	0.790088	-0.361337	1	-0.141494	-0.0164497	-0.542805	-0.244366	0.127541	-0.599889	0.785509
Glutamine.Glutamate	0.640903	0.0555153	0.298263	-0.464194	0.356445	0.321982	0.61389	-0.278693	0.563896	0.708955	-0.370386	0.452762	0.443493	-0.58383	0.141497	-1	-0.622554	-0.605967	-0.510232	0.467741	-0.379474	0.544583	-0.508347	0.281176	0.476302	0.546518	-0.209525	-0.640904	-0.0555019	-0.298286	0.464205	-0.356448	-0.321991	-0.613897	0.278689	-0.563912	-0.708952	0.370385	-0.452748	-0.443498	0.583842	-0.141494	1	0.622559	0.60597	0.510233	-0.467746	0.379472	-0.544581
N.Acetylaspartate.Glutamate	0.339248	-0.0390724	-0.18199	-0.677455	0.0940871	-0.0816804	0.614768	-0.24754	0.494316	0.592447	-0.394725	0.295352	0.320808	-0.599914	0.0164554	-0.622564	-1	-0.581679	-0.60824	-0.330376	-0.475805	0.199961	-0.364948	0.465262	0.420243	0.463933	-0.247267	-0.339242	0.0390663	0.18199	0.677455	-0.0940756	0.0816853	-0.614772	0.247551	-0.494318	-0.592456	0.394723	-0.295333	-0.320806	0.599914	-0.0164497	0.622559	1	0.581675	0.60825	0.330377	0.4758	-0.199958
N_Acetylaspartylglutamate.Glutamate	0.811489	0.568658	0.499061	-0.890512	0.691288	0.404514	0.267284	-0.823607	0.490256	0.563307	-0.898767	0.598002	0.697442	-0.952118	0.54281	-0.605949	-0.581675	-1	-0.669957	0.0749151	-0.957362	0.630019	-0.959502	0.631502	0.950395	0.935573	-0.668374	-0.81148	-0.56865	-0.499048	0.890512	-0.691277	-0.404502	-0.267292	0.823612	-0.490267	-0.563293	0.898768	-0.597988	-0.697441	0.952119	-0.542805	0.60597	0.581675	1	0.669974	-0.0749075	0.95736	-0.630019
GSH.Glutamate	0.548408	0.308445	0.212832	-0.610404	0.323983	-0.139201	0.513883	-0.39708	0.515326	0.627666	-0.491666	0.422944	0.544611	-0.612964	0.244371	-0.510237	-0.60825	-0.669974	-1	-0.0449602	-0.616444	0.266356	-0.573301	0.34961	0.552867	0.401394	-0.656964	-0.548391	-0.308422	-0.21281	0.610404	-0.323963	0.139199	-0.513879	0.3971	-0.515313	-0.62768	0.491667	-0.422928	-0.544619	0.612966	-0.244366	0.510233	0.60825	0.669974	1	0.0449669	0.616441	-0.26636
N.Acetylaspartate.Glutamine	-0.386864	-0.123312	-0.587291	-0.192737	-0.320358	-0.481359	-0.0444846	0.064557	-0.0947557	-0.155106	0.0294926	-0.16809	-0.13423	0.0467415	-0.127536	0.467747	-0.330377	0.0749036	-0.0449543	-1	-0.0678723	-0.414041	0.20352	0.196356	-0.0977485	-0.120316	-0.00655375	0.38687	0.123294	0.587295	0.192732	0.320375	0.481369	0.0444831	-0.0645397	0.09477	0.155086	-0.0294928	0.168096	0.134242	-0.0467555	0.127541	-0.467746	0.330377	-0.0749075	0.0449669	1	0.0678697	0.414039
N_Acetylaspartylglutamate.Glutamine	0.736064	0.654057	0.488605	-0.886879	0.693378	0.364407	0.102343	-0.877879	0.384724	0.422447	-0.929962	0.552459	0.676605	-0.90818	0.599894	-0.379457	-0.4758	-0.95736	-0.616425	-0.0678623	-1	0.558635	-0.949923	0.651946	0.952476	0.906547	-0.722171	-0.736051	-0.65405	-0.48858	0.886879	-0.693362	-0.364392	-0.102353	0.877883	-0.384733	-0.422433	0.929962	-0.552449	-0.676603	0.908181	-0.599889	0.379472	0.4758	0.95736	0.616441	0.0678697	1	-0.558637
Taurine.Glutamine	-0.732909	-0.523453	-0.652051	0.420617	-0.882639	-0.655723	-0.0184905	0.613247	-0.538488	-0.427913	0.56105	-0.806532	-0.602511	0.541305	-0.785508	0.544578	0.199963	0.630015	0.26636	-0.414037	0.558624	-1	0.679286	-0.771699	-0.755536	-0.683469	0.673048	0.732914	0.523455	0.652074	-0.420619	0.882639	0.655726	0.0184928	-0.61325	0.538508	0.427894	-0.561063	0.80654	0.602519	-0.541305	0.785509	-0.544581	-0.199958	-0.630019	-0.26636	0.414039	-0.558637	1
N_Acetylaspartylglutamate.N.Acetylaspartate	0.837093	0.681355	0.653234	-0.802547	0.783688	0.503932	0.1023	-0.885772	0.400529	0.455889	-0.918295	0.597403	0.701195	-0.899131	0.633672	-0.508324	-0.364948	-0.959502	-0.573295	0.203524	-0.949924	0.679288	-1	0.583902	0.965483	0.935089	-0.700949	-0.837084	-0.681347	-0.65322	0.802547	-0.783678	-0.503924	-0.102308	0.885776	-0.400542	-0.455868	0.918296	-0.597394	-0.701195	0.899132	-0.633668	0.508346	0.364952	0.959502	0.57331	-0.203514	0.949923	-0.679287
Taurine.N.Acetylaspartate	-0.517901	-0.462291	-0.287891	0.598963	-0.713502	-0.351386	-0.0167442	0.606601	-0.540626	-0.358723	0.589318	-0.749646	-0.567854	0.552075	-0.755752	0.281161	0.465276	0.631493	0.349602	0.196372	0.65193	-0.771699	0.583888	-1	-0.750013	-0.644637	0.74934	0.517905	0.462312	0.287912	-0.598963	0.7135	0.351379	0.0167461	-0.606614	0.540638	0.358719	-0.589331	0.749654	0.567854	-0.552069	0.755753	-0.281167	-0.465264	-0.631494	-0.349613	-0.196369	-0.651943	0.771697
Taurine.N_Acetylaspartylglutamate	-0.809621	-0.672877	-0.594632	0.817592	-0.823827	-0.491731	-0.0865043	0.884671	-0.478275	-0.453299	0.90869	-0.683225	-0.716235	0.878611	-0.716655	0.476286	0.420245	0.950395	0.552853	-0.0977565	0.952477	-0.755522	0.965484	-0.750004	-1	-0.93752	0.777851	0.809613	0.672874	0.594629	-0.817592	0.823822	0.491722	0.0865125	-0.884675	0.47829	0.453279	-0.908691	0.683218	0.716236	-0.878612	0.716653	-0.476306	-0.420246	-0.950395	-0.55287	0.0977512	-0.952476	0.755523
GSH.N_Acetylaspartylglutamate	-0.77613	-0.571622	-0.533845	0.824793	-0.726279	-0.575379	-0.105557	0.857729	-0.387184	-0.435526	0.893463	-0.575151	-0.63172	0.899594	-0.576851	0.546493	0.463924	0.935573	0.401377	-0.120323	0.906549	-0.683466	0.935089	-0.644632	-0.93752	-1	0.542543	0.776125	0.57163	0.533848	-0.824793	0.726278	0.575373	0.105565	-0.857731	0.387197	0.435508	-0.893463	0.57514	0.631714	-0.899595	0.576851	-0.546517	-0.463927	-0.935573	-0.401395	0.12032	-0.906547	0.683462
GSH.Taurine	0.622754	0.652129	0.513097	-0.544996	0.757881	0.203746	0.0145164	-0.661924	0.495208	0.368618	-0.641201	0.702395	0.654846	-0.560843	0.772371	-0.209528	-0.247269	-0.668386	-0.656965	-0.00653657	-0.722173	0.673049	-0.700957	0.749341	0.777876	0.542565	-1	-0.622743	-0.652122	-0.513079	0.544994	-0.757874	-0.203751	-0.0145156	0.661946	-0.495204	-0.368623	0.641214	-0.702395	-0.654854	0.560839	-0.772374	0.209532	0.247267	0.66839	0.656961	0.00654491	0.722187	-0.673062
Glucose	0.561258	0.490628	0.628494	-0.230015	0.538789	0.610869	-0.181412	-0.521735	-0.0014721	0.0790834	-0.49848	0.223632	0.382041	-0.405508	0.380845	-0.291321	0.0831824	-0.451216	-0.0822584	0.422262	-0.42139	0.444855	-0.549206	0.16346	0.488711	0.518694	-0.258652	-0.561246	-0.490608	-0.628463	0.230012	-0.538776	-0.610862	0.18141	0.521746	0.0014657	-0.0790593	0.498478	-0.223621	-0.382033	0.405509	-0.380841	0.291338	-0.0831734	0.451217	0.0822641	-0.422256	0.421392	-0.444856
Adenosine	-0.455309	-0.284302	-0.292037	0.216012	-0.421803	-0.299854	-0.249244	0.208344	-0.444333	-0.557641	0.148315	-0.593432	-0.456554	0.25303	-0.388678	0.389614	0.313143	0.341724	0.294688	-0.121404	0.273156	-0.450272	0.297606	-0.417221	-0.345204	-0.308865	0.343162	0.45532	0.28433	0.292066	-0.216014	0.421812	0.299869	0.249248	-0.208326	0.444335	0.557666	-0.148312	0.593448	0.456566	-0.253034	0.388684	-0.389613	-0.313128	-0.341727	-0.294681	0.121418	-0.273159	0.450289
Cytidine	0.408777	0.475326	0.443107	-0.289752	0.464845	0.284069	-0.20925	-0.505924	0.0260562	0.0370449	-0.471048	0.233583	0.430898	-0.309053	0.466467	-0.0877142	0.024578	-0.399043	-0.232063	0.11284	-0.444583	0.336774	-0.479264	0.275541	0.465575	0.394478	-0.430392	-0.408763	-0.475316	-0.443085	0.289752	-0.464823	-0.28406	0.209253	0.505936	-0.0260631	-0.037026	0.471057	-0.233574	-0.430894	0.309061	-0.466456	0.0877276	-0.0245678	0.399042	0.232067	-0.112837	0.444586	-0.336765
Hypoxanthine	0.35782	0.197772	0.192976	-0.3927	0.313876	0.177382	0.155469	-0.336726	0.286064	0.285302	-0.372472	0.312833	0.367015	-0.381088	0.286394	-0.339455	-0.294714	-0.435185	-0.298196	0.0351227	-0.394042	0.335336	-0.406342	0.333402	0.423422	0.416259	-0.3016	-0.357811	-0.197764	-0.192976	0.392702	-0.313859	-0.177374	-0.155467	0.336728	-0.286067	-0.285298	0.372473	-0.312817	-0.367003	0.38109	-0.28639	0.339472	0.29471	0.435185	0.2982	-0.0351284	0.394044	-0.335328
Inosine	0.452736	0.20182	0.226912	-0.521616	0.355609	0.178027	0.252309	-0.405489	0.36938	0.397426	-0.468262	0.368765	0.449189	-0.515588	0.297217	-0.480984	-0.397542	-0.56728	-0.437479	0.0855115	-0.496105	0.394949	-0.521021	0.362697	0.522368	0.515713	-0.365524	-0.452722	-0.201811	-0.226897	0.521617	-0.355572	-0.178015	-0.252309	0.4055	-0.369379	-0.397407	0.468265	-0.36874	-0.449178	0.515591	-0.2972	0.481	0.397543	0.567285	0.437483	-0.0855044	0.496101	-0.394936
Ribothymidine	0.542511	0.374942	0.363127	-0.616536	0.485496	0.34862	0.0712591	-0.633756	0.225182	0.280031	-0.67262	0.341296	0.4389	-0.660724	0.374866	-0.422329	-0.34783	-0.67982	-0.353331	0.0863493	-0.654486	0.460963	-0.682615	0.417773	0.660786	0.699467	-0.398127	-0.5425	-0.374938	-0.363108	0.616542	-0.485476	-0.348612	-0.0712524	0.633779	-0.225179	-0.280014	0.672625	-0.341282	-0.438894	0.660725	-0.374857	0.422345	0.347835	0.679821	0.353339	-0.0863448	0.654488	-0.460954
Glutamate	-0.496763	-0.33952	-0.233143	0.348863	-0.387565	-0.129614	-0.36288	0.265734	-0.486893	-0.585461	0.270548	-0.537669	-0.470757	0.385248	-0.325091	0.389479	0.484636	0.451449	0.587226	0.0426769	0.402492	-0.347815	0.361641	-0.441874	-0.400415	-0.315754	0.464741	0.49677	0.339516	0.233172	-0.348873	0.387583	0.129625	0.362881	-0.265731	0.486891	0.585489	-0.270553	0.537687	0.470778	-0.385256	0.325102	-0.389472	-0.484629	-0.451458	-0.587226	-0.0426656	-0.402495	0.347829
Glutamyl_L_hydroxyproline	0.566936	0.378864	0.379246	-0.617257	0.510065	0.366167	0.091711	-0.63195	0.261578	0.312222	-0.670985	0.379165	0.458238	-0.665856	0.39192	-0.455242	-0.361239	-0.690572	-0.370615	0.111506	-0.656411	0.497204	-0.689507	0.44514	0.674028	0.705533	-0.418824	-0.566927	-0.378856	-0.379229	0.617261	-0.510049	-0.366159	-0.091709	0.631968	-0.261578	-0.31221	0.670997	-0.379147	-0.458235	0.66586	-0.391917	0.455255	0.361247	0.690578	0.370622	-0.111502	0.656411	-0.497201
N_Acetylaspartylglutamate	0.688204	0.484578	0.479837	-0.805157	0.62242	0.440284	0.113994	-0.790387	0.329568	0.385368	-0.852451	0.464476	0.588591	-0.849282	0.493965	-0.512385	-0.405173	-0.878452	-0.457032	0.136246	-0.851524	0.583494	-0.887154	0.51442	0.855608	0.889961	-0.526934	-0.68819	-0.484572	-0.479804	0.805158	-0.622398	-0.440275	-0.113998	0.790398	-0.329577	-0.385349	0.852454	-0.46446	-0.588582	0.849283	-0.493956	0.512405	0.405178	0.878452	0.457039	-0.13623	0.851523	-0.583486
Threonate	0.357819	0.198658	0.193544	-0.392802	0.314358	0.177477	0.154441	-0.337413	0.285564	0.284584	-0.372905	0.312769	0.366854	-0.381185	0.286882	-0.338568	-0.294011	-0.435216	-0.297886	0.0347611	-0.394392	0.335406	-0.406658	0.333623	0.423711	0.416311	-0.302095	-0.35781	-0.198649	-0.193544	0.392804	-0.314341	-0.177469	-0.15444	0.337416	-0.285567	-0.28458	0.372906	-0.312752	-0.366841	0.381187	-0.286877	0.338584	0.294008	0.435216	0.29789	-0.0347668	0.394394	-0.335399
Glycerylphosphorylethanolamine	0.460546	0.381132	0.461006	-0.307785	0.41484	0.334616	-0.080428	-0.464415	0.0578029	0.214673	-0.422573	0.264956	0.43959	-0.369801	0.354902	-0.268523	-0.00394811	-0.446775	-0.25749	0.272569	-0.42875	0.334417	-0.510736	0.150195	0.450967	0.433764	-0.309435	-0.460533	-0.38111	-0.460976	0.307788	-0.414817	-0.334607	0.0804273	0.464426	-0.0578015	-0.214654	0.422569	-0.264941	-0.439578	0.369808	-0.354898	0.26854	0.00395338	0.446776	0.257492	-0.272558	0.428749	-0.334407
Docosahexaenoic_Acid.Oleic_Acid	-0.384897	-0.335575	-0.325816	0.215058	-0.365341	-0.239221	-0.0606734	0.290398	-0.221847	-0.277532	0.259541	-0.34727	-0.411713	0.229464	-0.365646	0.214301	0.128335	0.31293	0.248456	-0.11213	0.307785	-0.304565	0.330033	-0.254966	-0.332795	-0.290671	0.319465	0.384899	0.335574	0.325817	-0.215067	0.365355	0.239219	0.0606812	-0.290383	0.221862	0.277532	-0.259545	0.347281	0.411713	-0.229476	0.365646	-0.214297	-0.128327	-0.312932	-0.248449	0.112138	-0.307792	0.304577
Oleic_Acid.Docosahexaenoic_Acid	0.384881	0.335568	0.325806	-0.215058	0.365342	0.239216	0.0606554	-0.290399	0.221839	0.277512	-0.259543	0.347266	0.411711	-0.229459	0.365659	-0.214281	-0.128321	-0.312927	-0.248439	0.11212	-0.307786	0.304572	-0.330031	0.254979	0.332796	0.29067	-0.319472	-0.384882	-0.335567	-0.325807	0.215067	-0.365356	-0.239214	-0.0606632	0.290384	-0.221854	-0.277511	0.259547	-0.347278	-0.41171	0.229471	-0.365659	0.214277	0.128313	0.312928	0.248432	-0.112128	0.307793	-0.304583
[truncated: 18 more columns]
