# Supplementary material for: Untargeted pixel-by-pixel metabolite ratio imaging as a novel tool for biomedical discovery in mass spectrometry imaging
Source: eLife. 2025 Mar 18;13:RP96892. doi: 10.7554/eLife.96892 (PMC11919253; doi:10.7554/eLife.96892)
Supplement: Figure 8—figure supplement 6—source data 1. [file elife-96892-fig8-figsupp6-data1.xlsx]

## Sheet: Figure S10 C
V1	V2	clustergroup
-0.549628	1.30811	2
-6.84222	1.80795	3
-6.59019	-6.8806	1
3.51511	-0.712175	5
-2.89758	-3.71821	1
3.05618	-2.65261	5
3.56122	-5.06189	9
2.96555	-8.79524	9
2.41057	-13.1555	4
2.25748	-14.64	4
2.33542	-14.1731	4
2.86084	-11.5463	4
-1.1592	-8.40863	9
4.66248	-2.10789	5
-0.116224	-8.64273	9
-6.21763	-6.76348	1
-7.16939	-6.91992	1
2.87333	-8.56709	9
2.90899	-9.25434	9
-2.7187	-5.03908	1
-2.762	-4.10633	1
-2.51837	-4.08428	1
3.11291	-6.32492	9
2.90393	-8.58458	9
2.8926	-9.77645	9
2.41538	-13.1079	4
2.32902	-13.8727	4
2.44741	-14.2263	4
2.984	-13.8173	4
3.14492	-11.6725	4
-0.5181	1.28893	2
1.75901	5.32609	2
3.35506	0.701469	2
3.33455	-0.160625	2
2.56905	-2.66756	5
2.63214	-2.5806	5
3.48186	-1.26153	5
2.68198	-3.0982	5
-4.62933	-5.6607	1
-5.84557	-6.57209	1
-7.15132	-6.92174	1
-6.41084	-6.74448	1
2.95976	-9.93298	9
-2.70805	-5.03825	1
-2.62454	-4.94725	1
3.05435	-6.36953	9
2.87557	-8.54609	9
2.91818	-8.88381	9
2.84148	-10.8115	4
2.43203	-13.2074	4
2.57072	-13.232	4
2.5657	-13.2612	4
2.4775	-14.4068	4
2.36664	-14.6739	4
6.19001	0.210769	5
6.19122	-0.603223	5
5.48494	-0.356736	5
4.368	0.718749	2
2.04048	3.0633	2
2.96352	0.985106	2
2.78515	1.18744	2
2.01103	1.82931	2
1.01845	6.18609	7
1.31533	6.093	7
-4.10895	-3.42593	1
2.3093	0.518117	2
2.64475	-1.81739	5
-4.52018	-5.92731	1
-4.66628	-5.75085	1
-4.75464	-5.94042	1
-6.36359	-6.73872	1
-6.55468	-6.83634	1
2.88004	-9.88587	9
2.92752	-8.89166	9
2.98301	-8.69136	9
2.8819	-9.75266	9
2.94287	-9.24828	9
2.77918	-11.2542	4
2.43511	-13.1013	4
3.50323	-9.65555	9
3.2463	-8.75991	9
2.68339	-11.9414	4
2.4491	-14.1964	4
2.62022	-15.4635	4
2.44567	-14.7724	4
3.72372	-10.375	4
4.15837	-11.8128	4
3.25578	-11.1899	4
5.49639	-7.12003	9
3.75131	-6.88802	9
2.5192	-9.0716	9
2.70325	-2.98086	5
3.12757	-0.642948	5
3.12175	-1.14302	5
2.85112	-0.0940651	2
-2.3223	4.39767	3
1.15558	1.51005	2
1.66596	1.54396	2
2.50831	-0.121228	2
2.0385	1.00385	2
-1.48802	10.2791	7
-0.291111	8.38237	7
2.02734	0.835876	2
-3.08089	-3.82939	1
2.74216	-3.30551	5
2.18932	0.729505	2
3.56584	-5.59026	9
1.46936	7.469	7
-2.31299	-4.68668	1
2.7445	-11.3596	4
2.72434	-11.3124	4
2.73857	-11.4242	4
2.7246	-11.4295	4
3.28484	-6.22206	9
3.52611	-4.77719	5
3.92651	-4.71091	5
3.85098	-4.71471	5
3.86411	-6.94712	9
3.31188	-9.77102	9
2.86772	-12.364	4
2.93626	-13.9489	4
2.45111	-14.9341	4
4.20465	-10.2299	4
3.00491	-12.6077	4
3.9817	-8.38941	9
-5.51993	-6.23451	1
-5.18847	-6.23675	1
0.561121	-8.63708	9
-4.58656	-5.94138	1
-4.7072	-5.73776	1
-4.6268	-5.98513	1
-4.40239	-5.80848	1
-3.816	-3.33069	1
-3.75816	-3.27051	1
3.29905	-1.23493	5
-0.537136	1.12194	2
0.629586	3.41795	2
1.30828	1.6558	2
3.1312	-0.477686	2
2.29668	1.70986	2
2.29821	4.15709	2
1.74081	4.14544	2
3.10278	0.380197	2
3.75032	-1.24341	5
3.28166	-1.59193	5
4.84942	-2.13207	5
3.46733	-6.52336	9
-0.359576	6.65796	7
3.21535	-6.45406	9
3.17692	-6.22904	9
3.38219	-4.17026	5
-1.39268	-3.35743	1
3.51297	-4.064	5
3.53357	-3.04428	5
3.51825	-2.97447	5
3.61739	-3.16689	5
4.00776	-5.44467	9
3.95295	-5.75934	9
3.52618	-8.80884	9
3.35138	-10.1621	4
2.7622	-12.7535	4
2.96256	-13.3086	4
2.46038	-14.8478	4
1.37106	-4.18415	1
-7.11266	-6.91114	1
-6.31723	-6.67868	1
-6.1126	-6.58593	1
-5.29279	-6.23175	1
2.86233	-3.8376	5
-4.33982	-5.61	1
-4.8491	-5.95506	1
-4.57418	-5.90309	1
2.59948	-3.16838	5
-3.97743	-3.67717	1
2.61169	0.491568	2
2.68156	0.105577	2
1.31205	2.78422	2
1.4585	2.8254	2
3.18098	2.56049	2
4.51332	0.291254	5
5.59771	-1.08926	5
5.47075	-0.91312	5
3.75063	-1.05648	5
4.65265	-0.27335	5
5.59047	-1.28708	5
4.00102	-2.06315	5
3.41988	-2.85973	5
3.36813	-3.32652	5
3.33979	-3.16011	5
3.59475	-5.20168	9
3.59261	-4.70048	5
3.48722	-3.90543	5
3.44945	-3.08662	5
3.37869	-2.94146	5
3.62014	-2.44735	5
3.72539	-4.88493	5
3.81881	-4.08681	5
3.84804	-5.10185	9
4.1032	-5.6618	9
3.70839	-8.66579	9
3.43702	-10.5725	4
2.66248	-12.9962	4
2.58166	-13.6691	4
2.53715	-14.0459	4
2.51285	-14.5255	4
3.54338	-10.7608	4
-7.12622	-6.92252	1
-5.98277	-6.51363	1
-5.93394	-6.51782	1
-5.36179	-6.1445	1
-4.61396	-5.52086	1
3.55088	-1.15218	5
2.69607	-1.74614	5
2.90177	-0.0475562	2
3.8565	-0.111644	5
4.82471	-0.0198294	5
4.85302	-0.202779	5
4.75837	0.533932	2
4.25853	1.2483	2
4.83044	-0.351486	5
5.50971	-0.704275	5
4.89432	-0.240026	5
4.37044	-0.129221	5
4.8115	-0.152333	5
4.07063	-0.817076	5
3.91435	-1.09004	5
4.00491	-0.913334	5
3.85874	-0.401901	5
3.78095	-1.62363	5
3.76679	-1.00739	5
2.95321	-1.44769	5
3.26655	-2.6947	5
3.48223	-2.38338	5
3.17426	-2.50275	5
3.02645	-2.78329	5
3.21297	-3.03931	5
3.32983	-2.98084	5
3.42406	-3.56075	5
3.40479	-3.1045	5
3.73928	-4.95469	9
4.02219	-4.96492	5
4.25702	-5.70831	9
3.44872	-10.6736	4
3.0221	-12.6605	4
3.21397	-11.7494	4
3.13108	-14.4725	4
2.56948	-14.0905	4
2.4932	-15.4236	4
2.44641	-14.7398	4
3.73637	-9.90072	4
-6.62346	-6.8564	1
-5.95407	-6.48964	1
-5.48435	-6.11141	1
-4.57977	-5.64564	1
2.59316	-1.85466	5
2.48686	0.632486	2
1.70022	1.90346	2
1.4796	2.715	2
5.03032	-0.185925	5
6.9074	-2.82779	5
4.42295	1.58142	2
0.0984621	-0.0506354	2
-0.298165	4.47064	2
1.42516	3.03977	2
1.3973	2.38141	2
2.18896	2.59749	2
2.75955	2.36819	2
3.87115	1.73818	2
2.76889	2.18631	2
3.58182	1.62897	2
3.37074	2.23851	2
3.79463	1.76926	2
3.32109	2.0021	2
3.44836	1.76836	2
4.40719	0.0503392	5
4.16818	-0.278233	5
4.15494	-1.24845	5
4.12728	-0.904257	5
4.03414	-1.84686	5
4.22159	-2.16034	5
4.21494	-2.19719	5
3.48201	-3.6156	5
3.50729	-3.46325	5
3.64211	-4.15399	5
4.01782	-5.2591	9
4.02103	-6.08345	9
3.48396	-9.88524	9
3.4888	-10.4804	4
3.1178	-12.5665	4
3.38594	-11.6285	4
2.99594	-13.0129	4
2.98854	-13.8096	4
2.49487	-15.1342	4
2.53025	-14.57	4
-5.7662	-6.43188	1
2.81079	-7.54621	9
2.64437	-7.64343	9
2.78182	-2.20433	5
3.96235	-2.15176	5
3.79679	-1.40625	5
3.36267	-0.58575	5
4.49919	0.820057	2
4.90244	0.812902	2
4.35706	1.66973	2
3.25641	-4.23505	5
2.5373	-4.39859	5
0.300595	-1.53213	1
0.342336	-1.53991	1
0.248337	-0.394741	2
0.106227	-0.792245	2
-0.238768	-0.176621	2
0.13829	0.209992	2
-0.237072	1.35384	2
0.787969	3.09739	2
1.9664	2.86309	2
2.27731	2.28005	2
5.04656	0.728965	2
5.05802	0.0220446	5
5.43036	-0.388756	5
6.14448	-1.3604	5
5.45703	-1.49601	5
5.44697	-2.06301	5
5.66193	-2.03514	5
5.21782	-2.05316	5
5.27408	-1.66467	5
5.17432	-2.31067	5
4.97062	-2.72657	5
3.83329	-4.55701	5
3.80971	-5.2534	9
4.03496	-6.1947	9
3.84251	-8.35465	9
4.10026	-8.39412	9
3.51674	-10.7538	4
2.65178	-14.1462	4
2.64623	-13.8608	4
2.99364	-13.7766	4
2.83756	-15.3304	4
2.53	-14.4859	4
3.40875	-6.14669	9
3.65337	-10.0872	4
2.77308	-9.75858	9
2.50523	-9.5244	9
2.75925	-2.45622	5
4.23906	-1.74901	5
4.0287	-1.56049	5
2.75494	1.20581	2
3.15597	2.22681	2
4.44957	1.74401	2
6.21383	-2.66843	5
3.30498	-5.67405	9
6.44624	-9.84035	4
6.51784	-10.0313	4
0.852285	-2.66351	1
2.19287	-6.447	9
2.09317	-6.48534	9
6.71129	-10.2803	4
1.8941	-6.27789	9
6.91979	-10.344	4
1.85288	-6.21449	9
0.507993	-2.8302	1
-0.544409	-0.148047	2
0.239186	-2.47216	1
0.646047	2.93955	2
0.224403	4.69986	2
1.24807	3.36772	2
2.74299	2.13906	2
6.21959	-1.06441	5
6.20757	-1.5921	5
6.16236	-2.88029	5
6.635	-2.56497	5
6.26599	-2.13029	5
5.84531	-2.52247	5
5.71825	-3.78556	5
4.74965	-3.02297	5
5.17135	-3.45427	5
4.17067	-6.75898	9
3.80859	-8.53977	9
3.39946	-10.1233	4
3.31689	-11.7468	4
3.64936	-10.625	4
3.09777	-13.4076	4
3.25293	-12.9115	4
2.49472	-14.3531	4
2.50552	-14.7917	4
4.24386	-10.1363	4
3.5953	-12.3811	4
2.54575	-12.1426	4
4.06573	-7.6269	9
3.83568	-6.27143	9
4.40028	-3.17931	5
3.89718	-2.22046	5
2.25521	2.11745	2
2.5174	2.60896	2
6.12695	-0.984546	5
3.70249	-5.67035	9
4.75863	-8.93576	9
3.1335	-6.99241	9
2.00505	-5.45198	9
0.281745	-1.11444	1
2.4617	-6.70622	9
1.01861	-3.01908	1
1.77017	-4.97077	9
2.29312	-6.56976	9
1.53547	-5.5252	9
1.24553	-4.55757	9
0.865907	-3.89626	1
-0.0882766	-1.7409	1
0.387196	-2.655	1
-0.931381	-0.138847	1
-0.0455305	-2.89727	1
-0.276046	-2.29335	1
-0.954778	0.689517	2
0.753463	3.1744	2
2.52306	2.22406	2
5.87505	-1.00828	5
5.80041	-2.53948	5
6.12826	-1.63427	5
6.13859	-2.84289	5
6.24072	-2.81871	5
6.27333	-3.64071	5
5.63468	-3.37973	5
5.34242	-4.69314	5
4.23272	-6.52189	9
4.03455	-8.12921	9
2.77746	-12.0824	4
3.30901	-11.6722	4
3.24243	-11.9171	4
2.60873	-14.0687	4
2.79375	-15.3738	4
2.51308	-15.1266	4
2.56383	-15.1754	4
4.49602	-8.97131	9
2.87535	-10.4622	4
2.51918	-9.4557	9
5.16185	-3.40763	5
4.51397	-3.04777	5
1.76953	1.44444	2
2.10114	2.7359	2
4.66501	0.663896	2
4.28111	-3.96517	5
3.51983	-5.68099	9
5.34717	-9.84397	4
5.10922	-9.23838	9
1.78224	-4.91106	9
0.750617	-2.2883	1
1.65413	-3.7011	5
0.261442	-0.967851	2
2.37486	-6.66277	9
2.20822	-6.59775	9
1.95647	-6.32916	9
1.28993	-4.71824	9
6.86819	-10.987	4
2.03893	-6.46346	9
0.865528	-3.85303	1
-1.16305	0.627611	2
-0.195944	-1.67783	1
-0.667943	-1.04054	1
-1.00377	-0.31657	1
0.523786	-5.29618	1
-1.12405	-1.32322	1
0.771623	3.19395	2
1.40332	3.50999	2
6.10469	-1.42833	5
6.20245	-1.50884	5
5.64844	-3.39493	5
5.83875	-3.41606	5
5.77956	-3.23431	5
6.03789	-3.10393	5
5.38306	-4.60338	5
4.44868	-6.63914	9
3.82665	-8.65491	9
3.05486	-12.3118	4
3.18909	-11.9572	4
3.06397	-13.4897	4
2.49254	-14.7788	4
2.68947	-14.6393	4
2.68197	-15.6297	4
2.579	-14.4072	4
3.22234	-11.7769	4
2.80068	-9.80828	9
4.14043	-6.47657	9
4.09492	-1.8051	5
2.59571	1.36709	2
3.08546	0.75251	2
2.02673	2.72716	2
4.1891	-0.31718	5
4.44234	-5.11135	5
3.50027	-6.57391	9
4.9473	-11.5078	4
3.06921	-7.16815	9
0.524995	-1.04557	2
6.42842	-10.5476	4
6.66136	-11.0479	4
6.67962	-11.1612	4
6.42507	-10.5194	4
-0.104464	-0.111089	2
1.49204	-4.8214	9
1.79441	-5.68802	9
6.84011	-10.8069	4
-0.715321	-0.160185	2
6.99729	-10.1161	4
1.29719	-5.86184	9
7.01006	-9.90238	4
0.230957	-3.0943	1
0.666212	-5.00982	1
0.345814	-4.75055	1
-0.25931	-3.39299	1
-1.15175	-0.924925	1
-1.20041	-2.07879	1
0.582048	4.35618	2
5.21184	0.572343	5
6.16835	-1.58911	5
5.66168	-3.50331	5
5.44423	-4.61827	5
6.15415	-2.84957	5
6.24665	-4.01384	5
5.21121	-6.1437	9
3.89559	-8.54933	9
3.26406	-10.0036	4
4.07149	-9.3673	9
4.6936	-9.77047	4
2.9946	-13.5631	4
3.14427	-13.5192	4
2.79807	-15.4254	4
2.57367	-15.1478	4
2.90376	-12.4015	4
5.04158	-3.07808	5
3.0758	0.628212	2
2.69811	1.47437	2
3.38938	0.188517	2
3.925	-0.782875	5
3.84646	-0.121719	5
4.58515	-0.737825	5
4.37202	-5.88105	9
4.9309	-10.3621	4
4.44356	-14.4218	4
6.4553	-11.3181	4
2.16618	-4.46708	9
2.628	-6.8923	9
1.9562	-5.3395	9
6.36544	-10.0185	4
6.75248	-10.9695	4
0.812179	-2.80619	1
6.84698	-10.555	4
6.95643	-11.2746	4
0.174468	-2.22344	1
0.557826	-2.86072	1
6.99261	-10.2003	4
0.553336	-3.65257	1
0.185312	-2.8472	1
-0.357213	-1.05778	1
0.304989	-3.60918	1
0.0532613	-3.25529	1
-0.668155	-2.04922	1
-0.322546	-3.24046	1
-0.130151	-4.68392	1
-0.923634	-3.65117	1
0.969907	2.72283	2
2.32801	3.13018	2
5.52161	-2.05949	5
5.01352	-5.3205	5
4.88887	-5.16495	5
6.2437	-4.01172	5
6.42442	-4.06869	5
6.13724	-4.26039	5
4.38215	-8.48727	9
4.12456	-9.18318	9
3.28008	-11.6254	4
2.89308	-12.2465	4
2.75948	-13.8254	4
3.21919	-12.9124	4
2.81923	-15.3859	4
2.60291	-15.6824	4
4.15807	-12.3596	4
3.28862	1.09716	2
3.01933	0.864417	2
3.02251	2.16496	2
3.37469	1.28508	2
3.7262	1.14219	2
3.8253	-0.173268	5
4.36841	-0.694456	5
5.47345	-0.888795	5
4.70445	-5.7716	9
5.05692	-10.0236	4
4.61399	-13.3399	4
5.56666	-12.2224	4
2.31172	-4.76011	9
-0.0705003	0.060664	2
-3.70503	7.26198	7
1.50162	-4.46565	9
6.82391	-10.9301	4
-3.02173	3.99163	3
1.74466	-6.03445	9
6.92215	-10.9726	4
6.89483	-10.6349	4
6.9854	-10.1638	4
-0.410724	-0.585101	1
0.302038	-3.18363	1
0.346538	-3.28628	1
-3.93877	3.21086	3
0.28237	-3.77388	1
-1.80943	1.61241	3
0.427343	-5.34104	1
-1.21342	0.467588	2
-0.749684	-2.6164	1
-0.639833	-4.31077	1
-1.45077	-2.06861	1
0.836185	2.78368	2
0.240626	4.61321	2
5.55344	-0.655527	5
5.67962	-3.51724	5
5.01856	-5.35374	5
5.80886	-3.48709	5
6.22568	-3.74276	5
6.33699	-5.31971	5
5.30874	-6.76032	9
3.51916	-10.145	4
3.09704	-11.5801	4
3.4387	-11.6525	4
2.87169	-15.1317	4
2.98771	-15.1179	4
2.62421	-14.0474	4
2.67435	-15.6047	4
3.11106	-14.0313	4
2.64486	-12.3667	4
4.2331	-9.78618	4
2.83734	2.1134	2
2.95479	1.55677	2
3.0586	1.53421	2
3.71768	1.2019	2
3.49241	1.26114	2
4.48977	0.461039	2
4.78004	-0.203927	5
5.31415	-1.30704	5
5.74571	-5.07423	5
4.57645	-11.9455	4
4.24327	-13.1574	4
4.40233	-8.45629	9
0.506957	-1.0843	2
0.312875	-1.03915	1
-3.78669	7.29842	7
-0.145777	-0.368817	2
6.82549	-10.5982	4
-3.33883	4.44954	3
1.51787	-4.96878	9
6.97421	-11.2448	4
6.91193	-10.9806	4
6.96992	-11.2546	4
6.90499	-10.951	4
7.06976	-10.0728	4
0.360572	-2.72291	1
7.14599	-10.0955	4
7.14568	-10.1095	4
0.554744	-5.03274	1
-0.634882	-2.18064	1
-1.3996	0.0155525	1
-0.607058	-3.3126	1
-1.538	-1.48768	1
-0.947351	-3.59005	1
-1.67656	-2.76441	1
-1.80491	-2.44402	1
-1.06045	-0.111444	1
1.27869	3.78745	2
5.90029	-3.02786	5
5.31607	-5.28938	5
5.23436	-5.35162	5
6.16927	-3.10519	5
6.38897	-5.32938	5
5.50844	-6.71326	9
3.74496	-9.92463	4
3.24601	-11.652	4
3.01402	-14.931	4
2.76713	-14.6026	4
3.11397	-14.0498	4
2.65813	-15.0975	4
-80.3386	-28.2531	6
2.66756	-15.6342	4
4.75633	-12.0968	4
1.25476	4.16754	2
2.79061	2.87295	2
3.19972	1.77988	2
3.88503	1.23743	2
3.70376	1.3499	2
4.42344	0.716706	2
4.99345	-1.14809	5
5.28514	-1.46123	5
6.22996	-5.13148	5
4.20535	-13.2456	4
4.09665	-13.8617	4
1.03881	-2.01428	1
6.43866	-10.7649	4
2.2987	-6.57851	9
0.212049	-0.974184	1
1.53148	-5.09617	9
0.992741	-3.94009	1
0.951792	-4.00061	1
0.0328606	-1.16881	1
1.97155	-6.38463	9
-0.492835	0.200098	2
6.9593	-10.8062	4
6.97063	-10.932	4
6.9982	-10.1964	4
0.811844	-4.61493	1
6.99946	-10.7951	4
7.00785	-10.7283	4
-0.387744	-2.32705	1
0.592626	-5.49774	9
0.461873	-5.39644	1
0.417963	-5.37315	1
-0.179841	-4.67875	1
-1.20669	-2.88886	1
-1.6566	-2.74398	1
-0.972985	-4.24867	1
0.0245539	2.53431	2
2.77614	-1.05197	5
2.04095	3.26263	2
5.64191	-0.721773	5
5.72161	-4.49539	5
4.63141	-6.28552	9
6.05525	-3.2809	5
5.96235	-6.19792	9
4.818	-7.51616	9
4.22253	-8.33889	9
3.10737	-12.5045	4
3.68639	-11.7236	4
3.57548	-13.5541	4
3.00897	-14.9496	4
2.70003	-15.5951	4
2.66399	-15.6544	4
2.8197	-15.3163	4
0.626448	8.18152	7
2.00356	4.34064	2
3.51534	1.64078	2
3.9129	1.28768	2
4.12014	1.17422	2
4.55547	0.550017	2
4.79772	0.348188	5
5.57494	-1.2416	5
6.69448	-3.34177	5
5.20738	-9.60351	4
4.43964	-12.802	4
1.02011	-2.20735	1
5.37668	-9.31353	9
0.301318	-0.922357	2
2.19733	-6.47475	9
1.51856	-4.50693	9
1.92038	-6.00373	9
6.91444	-11.0262	4
0.970441	-3.98736	1
0.457422	-2.67976	1
1.90602	-6.33739	9
0.55024	-3.53369	1
6.99327	-10.6264	4
7.00251	-10.7493	4
1.12994	-5.73143	9
7.10754	-10.0772	4
7.15	-10.0883	4
-0.432957	-2.19886	1
0.561332	-5.42379	9
0.606376	-5.52929	9
-0.129904	-4.70813	1
0.200479	-5.12812	1
-1.59528	-0.179748	1
-1.7536	-1.64254	1
-1.82746	-4.24954	1
-2.21769	-4.19447	1
-2.36311	-4.1729	1
-2.62648	-4.09186	1
-2.66053	-3.70647	1
3.31651	2.07086	2
5.80906	-3.67093	5
5.66897	-4.90988	5
5.9131	-4.81482	5
6.22531	-5.3855	5
5.90845	-5.0327	5
3.97598	-9.21841	9
3.15431	-12.9644	4
3.38551	-14.1827	4
2.76838	-14.7548	4
2.68976	-14.6356	4
2.76291	-15.1953	4
3.00757	-14.8364	4
0.206152	8.46984	7
2.02674	5.16781	2
2.77537	2.94287	2
4.06407	1.35045	2
4.58022	0.943517	2
4.97027	0.228919	5
5.02548	0.165364	5
6.42962	-1.16513	5
6.84703	-3.53859	5
5.09628	-9.941	4
5.00042	-10.7868	4
0.968527	-1.05746	2
5.81312	-10.0308	4
-2.79131	4.16814	3
-3.14892	4.77577	3
-0.463987	0.214201	2
-0.18656	-0.39407	2
0.930375	-3.94454	1
6.93777	-10.5156	4
0.116694	-2.13363	1
0.0271329	-1.97011	1
0.0325229	-2.01194	1
7.12588	-10.1828	4
7.01147	-9.90393	4
7.15318	-10.2173	4
0.203415	-3.19268	1
0.591697	-5.18005	1
-0.396283	-2.33254	1
0.326355	-4.88461	1
-0.273604	-3.65999	1
-1.89654	1.59536	3
-1.38544	-1.79062	1
-1.33505	1.75109	3
-1.48739	-3.5337	1
-2.3761	-3.48811	1
-2.54388	-4.61982	1
-2.85606	-2.59566	1
-3.18537	-4.27395	1
2.01039	0.656858	2
-3.11699	-3.84175	1
3.80334	1.94432	2
5.39693	-4.61599	5
4.87752	-4.34995	5
6.19203	-4.5141	5
5.97194	-5.84171	9
5.32155	-7.20585	9
3.39889	-11.4435	4
3.57086	-13.5254	4
-80.4951	-28.1828	6
2.79963	-15.0972	4
2.58605	-15.1384	4
2.99502	-14.8925	4
0.440402	8.44545	7
1.95685	5.3031	2
3.25921	2.58908	2
4.27215	2.41417	2
4.97318	0.695105	2
4.97733	0.320552	5
5.49533	-0.77171	5
6.3587	-1.46619	5
6.90923	-4.26456	5
4.17088	-11.0681	4
4.42186	-11.5011	4
1.02545	-1.0939	2
5.35824	-9.25092	9
-2.60569	4.17044	3
0.343947	-1.06854	1
1.48425	-4.43434	9
-3.45536	3.64392	3
-0.200281	-1.17179	1
0.774943	-3.83684	1
-0.118233	-1.5202	1
-0.4523	-0.492578	1
7.08594	-10.0844	4
0.232248	-3.24337	1
7.03601	-9.87195	4
7.13991	-10.0996	4
-2.87241	4.68196	3
0.265665	-3.60096	1
-0.381999	-2.35396	1
-0.066791	-3.24397	1
-0.13634	-3.19944	1
-0.237785	-3.84612	1
-1.59219	0.0755668	3
-2.02292	-0.150184	1
-2.26869	-4.01551	1
-2.07311	-1.37272	1
-3.11242	-4.44819	1
-3.20949	-4.47313	1
-3.84014	-4.64696	1
-4.13706	-4.68133	1
-3.6789	-4.25354	1
-3.51797	-4.14913	1
3.63361	1.84753	2
5.19799	-4.74899	5
5.56916	-4.65281	5
6.41152	-4.55468	5
5.80107	-5.27557	5
3.45898	-10.2669	4
3.00905	-13.5611	4
3.2482	-14.7415	4
3.12618	-14.4603	4
3.07209	-14.4723	4
2.78265	-14.8438	4
1.33427	6.16889	7
1.71511	5.6947	2
3.30001	2.90891	2
4.31973	2.36467	2
4.87054	0.586458	2
5.91694	0.225682	5
6.61925	-1.43676	5
6.77957	-4.32242	5
6.28072	-7.14604	9
3.94131	-11.2407	4
4.44381	-12.163	4
5.23603	-10.0491	4
5.18684	-8.14295	9
0.194236	-0.22942	2
-2.6184	4.12931	3
-0.104674	-0.0257706	2
0.946772	-3.06132	1
0.0657465	-1.2759	1
-0.411098	0.197638	2
1.36304	-5.87544	9
0.767833	-3.91291	1
6.96506	-10.9281	4
0.357124	-3.31796	1
-0.878984	-0.165473	1
-0.228113	-2.36359	1
-1.00832	-0.249411	1
-0.809344	-0.885549	1
7.15537	-10.0099	4
0.742222	-5.55315	9
0.40829	-4.99741	1
0.449815	-5.32939	1
-0.633346	-4.26385	1
-1.67917	-2.86094	1
-1.80016	-4.11897	1
-2.37672	-3.99549	1
-2.88979	-4.31068	1
-2.6639	-0.908661	1
-4.09716	-4.52559	1
-3.90576	-3.32856	1
-4.71256	-5.41534	1
-3.77404	-3.29628	1
-3.69238	-3.69821	1
2.94665	1.81631	2
4.86018	-6.11063	9
6.01651	-4.41165	5
6.16941	-5.61277	5
5.29441	-6.80427	9
3.42768	-11.2609	4
3.3613	-12.5822	4
3.36938	-14.1952	4
3.00162	-14.4988	4
3.14396	-14.3187	4
2.15254	6.57604	7
1.91112	5.98008	7
2.02056	5.23407	2
3.18742	2.9857	2
4.38948	1.84715	2
5.89616	0.074527	5
6.63231	-0.998682	5
7.1871	-3.6643	5
6.61444	-5.30582	5
6.26263	-7.12681	9
3.8851	-11.2963	4
3.88547	-11.3278	4
6.15259	-7.3861	9
5.21345	-7.55557	9
2.81274	-4.43612	5
-2.57642	4.12942	3
-2.86787	4.28374	3
-3.11553	3.86761	3
-3.03141	3.85196	3
-0.309471	-0.400611	2
6.89709	-9.8995	4
-2.95891	3.85684	3
7.1479	-10.1724	4
0.76802	-4.55497	1
-0.896187	-0.469178	1
-1.15974	0.00735488	1
-0.27932	-1.97697	1
0.759068	-5.39423	9
7.15784	-10.1642	4
7.16042	-10.1065	4
0.684863	-5.54308	9
0.0516215	-4.51959	1
-1.17846	-2.45402	1
-1.77268	-2.04833	1
-2.08736	-2.23427	1
-2.37985	-3.07738	1
-2.9567	-3.63797	1
-4.03586	-4.44577	1
-4.80299	-5.36239	1
-4.52218	-4.70097	1
-4.62366	-4.77497	1
-4.84677	-5.31219	1
-4.82264	-5.61323	1
-3.58929	-4.0584	1
5.36262	-1.43398	5
5.34924	-4.65659	5
6.27748	-3.98902	5
5.62941	-6.70272	9
3.66091	-10.0642	4
3.27449	-11.4845	4
2.96339	-14.9154	4
-80.5298	-28.1531	6
3.20293	-14.4265	4
2.10442	6.65425	7
1.92117	5.24983	2
3.01978	4.57863	2
3.91081	3.04256	2
4.56526	1.43517	2
6.22598	-0.000364365	5
7.04466	-1.87563	5
7.2424	-4.1838	5
7.13158	-4.88975	5
6.84029	-5.56227	5
6.32488	-7.19992	9
6.27105	-7.15229	9
6.5457	-4.68203	5
6.124	-6.29458	9
5.33741	-7.87806	9
1.98297	-3.75294	5
-3.03728	5.12576	3
-0.316705	0.285262	2
0.896876	-3.01556	1
0.906864	-3.30526	1
-0.441357	-0.333399	2
0.495609	-2.78577	1
-0.771271	-0.466778	1
0.239191	-3.17079	1
0.253205	-3.81256	1
0.223005	-3.22893	1
7.17985	-10.106	4
0.751135	-5.56096	9
7.15928	-10.1254	4
0.489851	-5.28689	1
-1.0288	-1.25066	1
-1.0688	-1.59035	1
-2.08383	1.9822	3
-1.13894	-3.58112	1
-1.74838	-2.78864	1
-1.93297	-4.03201	1
-2.88903	-3.08871	1
-4.12613	-4.75305	1
-3.9642	-3.91551	1
-4.53895	-4.66964	1
-4.50322	-4.56328	1
-5.25185	-5.96067	1
-4.93068	-5.49484	1
-5.05892	-5.8813	1
2.71287	-1.69433	5
5.73535	-2.01894	5
5.86831	-3.45622	5
6.06776	-5.16909	5
5.6467	-6.90392	9
3.66912	-9.96798	4
2.63428	-13.0913	4
3.24628	-12.5903	4
3.12486	-14.4204	4
2.8533	-14.1826	4
3.6259	-5.9681	9
4.56874	2.11214	2
2.97518	4.68065	2
3.93638	2.88958	2
4.96231	2.18964	2
5.90092	1.03399	5
6.24162	0.567164	5
7.02633	-1.84217	5
7.33979	-3.81404	5
6.78775	-1.86492	5
7.00705	-3.52492	5
7.09397	-4.84161	5
6.8584	-4.23481	5
7.03201	-3.30546	5
6.62059	-5.3685	5
6.07866	-7.18536	9
4.21446	-5.27787	9
-2.57226	4.09321	3
-2.59023	4.07938	3
0.710968	-2.40907	1
0.0777761	-1.25089	1
-0.44368	-0.109552	2
0.314046	-2.64045	1
-0.696087	-0.216918	2
0.204393	-2.81822	1
-0.25215	-2.30417	1
7.07118	-9.93681	4
7.13299	-10.022	4
0.642968	-5.27597	1
-0.842275	-1.10117	1
-1.0819	-1.14692	1
-1.13826	-1.79449	1
0.0170109	-4.78905	1
-0.0423893	-4.71881	1
-1.46803	-1.7971	1
-1.46501	-2.2879	1
-1.81559	-3.83238	1
-2.81797	-2.91415	1
-3.78682	-4.65918	1
-4.30703	-4.65682	1
-4.94522	-5.32987	1
-5.1695	-5.64886	1
-4.95593	-5.29611	1
-5.31082	-6.03548	1
-5.01736	-5.62693	1
-4.66723	-5.26268	1
3.16649	2.22453	2
5.40174	-4.66835	5
6.3258	-4.27458	5
5.5775	-6.85893	9
3.95688	-9.64706	9
-80.4582	-28.1849	6
3.25174	-13.5872	4
3.07595	-14.2204	4
2.77906	-14.504	4
3.38155	-14.0171	4
5.10645	1.82565	2
5.23972	1.81237	2
5.20973	1.86185	2
5.8787	0.867517	5
5.9558	0.859906	5
5.97247	0.859446	5
6.15869	0.436246	5
6.24861	0.147142	5
7.03309	-1.82602	5
6.9079	-2.90204	5
6.95389	-2.76532	5
6.57427	-1.03117	5
6.24494	-0.900665	5
6.14383	-2.95919	5
4.53272	-10.8357	4
6.31947	-3.00655	5
0.935861	-0.848451	2
-4.00966	7.64909	7
0.304324	-1.10299	1
-0.21082	0.111444	2
0.954887	-2.96645	1
-0.511971	0.288756	2
-3.03392	4.71517	3
-0.0757052	-1.80712	1
1.15423	-5.7555	9
-0.248488	-1.62454	1
-2.96283	3.50984	3
0.227417	-3.85391	1
-0.147935	-2.93267	1
-1.1022	-0.388081	1
-1.07759	-1.33887	1
0.611297	-5.54195	9
-0.0375855	-4.39307	1
-1.366	-1.79773	1
-0.8717	-4.1599	1
-1.86725	-3.47936	1
-2.77626	-3.80279	1
-3.21523	-4.18157	1
-3.91477	-4.62994	1
-4.66917	-4.92177	1
-4.81485	-5.09508	1
-5.02053	-5.35483	1
-5.20777	-5.75397	1
-5.19121	-5.71578	1
-4.71951	-5.26785	1
1.38738	1.71388	2
4.74943	-3.6379	5
5.40001	-3.74937	5
6.15661	-6.13537	9
5.14612	-8.75948	9
2.75102	-12.7038	4
3.15046	-13.482	4
3.11484	-12.8931	4
3.13732	-13.4026	4
2.57487	-15.4706	4
5.06379	2.38189	2
3.77643	3.69198	2
3.37503	4.56652	2
3.39841	4.58211	2
3.30976	4.60425	2
1.24493	9.14363	7
1.10603	9.06868	7
3.65283	4.08254	2
3.30645	3.00222	2
6.02488	0.430909	5
6.62476	-1.37991	5
6.82065	-2.53061	5
5.47081	0.113949	5
5.35686	0.345922	5
6.89827	-5.62333	5
6.3594	-7.68965	9
3.52511	-4.5553	5
-4.1967	7.67747	7
-2.85867	4.2167	3
-3.04049	3.95479	3
0.828624	-2.63601	1
0.933348	-3.01437	1
-0.157948	-0.475376	2
-3.06963	3.59284	3
1.91311	-6.30458	9
-0.86993	0.168204	2
-2.91539	3.25278	3
-3.26659	4.29024	3
0.229913	-3.89508	1
-0.766953	-1.09598	1
-1.10591	-0.944995	1
-2.70844	2.61625	3
-1.219	-1.4575	1
-1.75238	0.952347	3
-1.54162	-1.85764	1
-2.18419	-2.50236	1
-2.47795	-3.09731	1
-3.14989	-4.18049	1
-3.74818	-4.07612	1
-3.95727	-4.16509	1
-4.8423	-5.19741	1
-4.61581	-4.74382	1
-4.85132	-5.12744	1
-4.84718	-5.21493	1
-4.14193	-4.65494	1
-4.08189	-4.66575	1
3.84843	1.76943	2
5.33854	-5.31447	5
6.25259	-4.04546	5
5.59564	-6.87589	9
4.3465	-8.64092	9
-80.4997	-28.1616	6
2.98756	-13.7369	4
3.01387	-14.7689	4
3.40215	-13.627	4
2.61152	-15.6754	4
-4.18825	9.94174	8
-4.4339	10.2171	8
-4.6999	10.6488	8
-4.65485	10.4886	8
-4.71137	10.6716	8
-4.69909	10.6749	8
-4.36913	9.9311	8
-4.05273	9.3407	7
-4.1814	9.3644	7
3.26133	4.47342	2
6.58912	-1.28596	5
6.84263	-3.62291	5
6.49773	-2.73794	5
6.32431	-0.788246	5
6.65926	-2.40831	5
6.62743	-2.4144	5
5.48496	-1.9058	5
-0.455411	4.63602	2
-3.28345	4.74351	3
-5.62978	2.52926	3
-4.14982	3.29044	3
0.814713	-2.87854	1
0.438806	-1.89778	1
-0.329626	-0.563058	1
1.7068	-5.73666	9
-0.593759	0.277297	2
-0.738859	-0.563568	1
-2.42448	4.47683	3
-3.01343	3.52203	3
-0.0726974	-3.09354	1
-0.876973	-1.09335	1
-0.142365	-3.1572	1
-2.63982	4.70195	3
-1.6309	-0.0825679	1
-1.70045	-1.35908	1
-2.02857	-1.10619	1
-1.86024	-3.87076	1
-2.35566	-4.11816	1
-3.04089	-3.71579	1
-3.67406	-4.30546	1
-3.89013	-3.46071	1
-3.97319	-4.17027	1
-4.0752	-3.98969	1
-4.4452	-4.92209	1
-4.36836	-4.88709	1
-3.87975	-4.6248	1
2.7595	-0.0912281	2
5.82676	-3.15645	5
4.81194	-5.78538	9
5.96423	-4.8755	5
4.49259	-9.01098	9
2.68285	-12.344	4
3.33915	-12.5146	4
3.2593	-13.6455	4
3.04689	-14.8638	4
2.78659	-15.3836	4
2.51514	-14.7591	4
3.54291	-5.8494	9
-4.48528	10.1713	8
-4.29372	9.63388	8
-4.38633	9.69159	8
-4.40844	9.76869	8
-4.37953	9.72288	8
-3.75677	9.167	7
-3.93852	9.2779	7
-3.74183	9.02339	7
3.28689	4.56152	2
4.28878	1.55096	2
6.16914	-2.78549	5
6.01723	-3.10484	5
6.33127	-1.87682	5
6.505	-2.70506	5
5.85965	-0.471961	5
5.34481	-1.73005	5
5.18355	-1.83244	5
-3.47895	7.52885	7
-3.84736	3.44434	3
-4.05239	3.34438	3
-4.46583	3.13074	3
-4.54656	3.08385	3
-5.49838	2.63387	3
-5.04704	2.77504	3
0.457234	-3.38316	1
-0.555946	0.25843	2
-2.9434	3.69114	3
-0.344032	-0.959468	1
-3.24459	4.06873	3
0.155677	-3.66189	1
0.527523	-5.1447	1
-0.489782	-2.39162	1
-0.666806	-3.12379	1
-1.89823	1.68992	3
-1.6655	-0.228959	1
-1.98684	-0.0345467	3
-1.99911	-2.47182	1
-2.13702	-2.98736	1
-2.40297	-3.15965	1
-2.33179	-0.31714	1
-3.0854	-2.88544	1
-3.31256	-4.49048	1
-3.46845	-4.41566	1
-3.72321	-4.69604	1
-3.52366	-3.57846	1
-2.9224	-2.58804	1
-3.13233	-3.7014	1
2.87951	2.69704	2
5.75399	-5.04288	5
6.11149	-2.93986	5
6.00488	-5.92813	9
4.46014	-8.59007	9
3.486	-11.3668	4
3.3463	-12.6688	4
3.14786	-14.4007	4
2.93296	-15.2206	4
2.52219	-15.134	4
2.6131	-15.6756	4
4.24172	-10.1524	4
-4.3522	9.75527	8
-4.39382	9.75888	8
-4.30593	9.58875	8
-3.78635	9.3126	7
3.26422	4.69496	2
-3.72676	9.0791	7
-3.70037	9.14658	7
3.34219	4.54033	2
3.363	2.87466	2
6.68687	-1.70968	5
6.69544	-4.06984	5
6.30269	-4.72491	5
6.41012	-4.03309	5
5.69985	-0.407146	5
1.35903	3.41932	2
3.33651	1.93417	2
4.38436	-0.0466879	5
-4.31961	8.62726	7
-4.36206	3.13164	3
-3.3012	3.85129	3
-4.53361	3.07626	3
-5.61919	2.51366	3
-6.07828	2.18955	3
-6.44042	1.86587	3
-4.84805	2.73799	3
-5.58257	2.28135	3
-7.03681	1.39242	3
-6.79076	1.51169	3
-1.50065	0.228614	3
-0.826732	-1.0302	1
-1.85804	1.73647	3
-1.04793	-2.4161	1
-0.758792	-3.17241	1
-0.90143	-2.86182	1
-0.559478	-4.31622	1
-1.46955	-2.22635	1
-1.27738	-3.68065	1
-1.96093	-2.66902	1
-2.29226	-0.363685	1
-2.57406	-3.03311	1
-2.86412	-3.0268	1
-2.97345	-3.37225	1
-3.03767	-4.29405	1
-3.09008	-4.48937	1
-3.0416	-4.43134	1
-2.89479	-4.49307	1
-2.75305	-3.44444	1
2.91089	-1.34331	5
6.16031	-3.73749	5
6.07018	-3.02964	5
5.82265	-5.23734	5
4.82595	-7.65923	9
3.40342	-10.6184	4
2.51403	-14.4835	4
2.82801	-13.613	4
2.91214	-13.7388	4
2.73483	-14.9014	4
2.7535	-15.3794	4
2.47096	-14.5617	4
3.91291	-10.267	4
7.46378	-4.00269	5
7.05649	-1.85677	5
5.84054	1.38991	2
3.98199	3.64718	2
-3.84189	9.58632	7
-4.21778	9.93989	8
-3.82514	9.3962	7
-3.73271	9.06943	7
5.5501	0.814147	5
7.44244	-4.12856	5
7.0649	-5.07898	5
6.71904	-5.31126	5
6.74026	-5.31585	5
6.62175	-4.70896	5
6.60524	-1.59142	5
5.54999	-1.28632	5
3.33846	2.7388	2
-4.23953	8.53409	7
-2.78777	5.08238	3
-3.04697	4.42762	3
-4.76001	3.00695	3
-5.94784	2.33042	3
-6.29806	2.04137	3
-6.38953	1.921	3
-5.50857	2.25653	3
-6.86169	1.23774	3
-5.65981	1.7509	3
-6.92804	1.04496	3
-4.91684	1.59082	3
-4.96007	1.60347	3
-4.5979	1.70971	3
-1.28479	0.267908	2
-1.02162	-2.43806	1
-0.605582	-3.43954	1
-1.09957	-2.78041	1
-1.17765	-2.80303	1
-1.13036	-3.55442	1
-1.99748	-1.37792	1
-2.20725	-0.3689	1
-2.58602	-2.21285	1
-2.80369	-3.89665	1
-2.79743	-3.67607	1
-2.73514	-3.36279	1
-2.53968	-3.87104	1
-2.7284	-3.7798	1
-2.55245	-4.10001	1
-2.7336	-3.98497	1
-2.25131	-3.06528	1
2.88284	2.16957	2
6.02559	-2.81208	5
6.37371	-4.42573	5
5.4113	-7.18494	9
3.22304	-11.5129	4
3.15177	-13.4863	4
3.38529	-13.0144	4
-80.7294	-28.2665	6
2.93849	-15.181	4
2.84221	-15.3608	4
2.61161	-15.6841	4
2.47699	-14.0726	4
7.08206	-4.96837	5
7.29976	-3.88494	5
6.9597	-1.53452	5
5.68545	1.03657	5
3.89216	3.72412	2
3.31031	4.64031	2
-3.7647	9.21314	7
-3.79141	9.1307	7
4.11039	2.91311	2
6.08656	0.443358	5
6.19726	0.347872	5
6.34839	-1.40223	5
6.59637	-1.56246	5
6.89911	-3.16068	5
6.64635	-1.35681	5
4.77523	1.39433	2
-3.48524	7.83567	7
-3.92686	8.01074	7
-4.03136	7.97252	7
-3.38759	3.67299	3
-6.00397	2.35494	3
-5.95332	2.36153	3
-6.13926	2.12843	3
-4.54415	3.04946	3
-6.69882	1.59897	3
-6.45639	1.57442	3
-5.28402	1.83192	3
-3.79569	2.55581	3
-3.98228	2.089	3
-5.6023	1.06484	3
-4.12787	1.6025	3
-4.63599	1.37603	3
-4.69507	1.44464	3
-1.22481	-1.77982	1
-0.674614	-3.20175	1
-1.50226	-0.991158	1
-1.50522	-2.60124	1
-1.73303	-1.62922	1
-2.07414	-2.58956	1
-2.37025	-3.48207	1
-2.77649	-2.67651	1
-2.43047	-4.05717	1
-2.48292	-3.34151	1
-2.4275	-2.69993	1
-2.3863	-1.10936	1
-2.31835	-4.25914	1
-2.36575	-4.17609	1
-2.34337	-3.53013	1
2.43837	3.02593	2
6.22932	-2.68803	5
6.08435	-2.86795	5
5.62426	-6.68117	9
3.50485	-10.4323	4
3.42771	-10.978	4
3.13356	-12.7266	4
3.02109	-14.4288	4
2.73645	-14.9383	4
2.83559	-14.2841	4
2.60629	-15.6704	4
2.43543	-14.4714	4
7.47156	-4.04306	5
7.28672	-4.5303	5
7.31024	-4.16152	5
7.32868	-3.90399	5
6.66	-1.46945	5
6.0255	0.32894	5
4.76067	2.23193	2
3.75396	3.7996	2
3.80214	3.58804	2
3.72626	3.82562	2
-3.61911	8.31422	7
-4.91532	10.2343	8
-5.99635	11.7827	8
-6.07605	11.9369	8
-4.26241	9.98407	8
2.27685	3.4227	2
0.287717	4.62213	2
-3.51812	7.5207	7
-4.39471	8.82167	7
-4.6128	9.24308	8
-2.74815	5.35954	7
0.0737052	-2.09067	1
-5.049	2.71955	3
-4.72691	2.78638	3
-5.32245	2.508	3
-5.5899	2.25921	3
-6.37428	1.67711	3
-5.72987	1.72042	3
-5.88926	1.46116	3
-4.20695	1.87015	3
-5.50072	1.0203	3
-6.07412	0.652499	3
-5.41534	0.546624	3
-4.7623	1.04797	3
-4.23114	1.27989	3
-1.34136	1.06163	3
-1.22164	-1.24034	1
-1.38446	-1.68665	1
-1.39258	-2.46409	1
-1.6156	-2.58521	1
-2.35931	-2.64034	1
-2.49699	-2.11135	1
-2.47161	-3.42742	1
-2.28955	-2.62564	1
-2.20096	-2.34477	1
-1.88256	-4.46925	1
-1.94644	-3.80696	1
-2.10132	-3.73549	1
-2.04399	-3.65674	1
1.88719	3.40378	2
6.397	-3.82172	5
6.04941	-2.81884	5
5.82269	-5.16589	5
4.46632	-9.01158	9
3.49072	-10.4454	4
3.08337	-12.9666	4
2.65602	-13.8009	4
2.8534	-13.7883	4
3.10118	-13.3112	4
2.63951	-15.6444	4
2.56144	-14.3288	4
7.24757	-4.73506	5
6.86356	-5.68063	5
7.08722	-3.69591	5
6.58887	-1.48403	5
6.09464	0.151623	5
5.65971	-1.25694	5
4.86158	1.65249	2
4.37388	2.33332	2
4.32241	2.43274	2
3.94583	2.92732	2
3.59385	2.49743	2
1.64679	2.62585	2
-3.39157	7.57803	7
-3.07461	7.79228	7
-3.36166	7.92486	7
-1.79949	5.65332	7
-0.934819	5.06511	7
-3.48601	7.52065	7
-3.91755	8.08172	7
-3.94777	8.18651	7
-4.60138	9.0314	8
-2.608	6.09952	7
-3.2226	4.90914	3
-5.53209	2.54162	3
-5.33402	2.37927	3
-5.53769	2.3327	3
-4.27227	3.05279	3
-3.44456	4.58911	3
-5.3675	1.80556	3
-4.52017	1.99518	3
-5.46282	1.10153	3
-4.75037	0.881379	3
-1.93292	3.08532	3
-1.82627	2.72868	3
-1.70196	3.33523	3
-4.66421	0.640013	3
-1.81476	0.593661	3
-0.576501	-3.28853	1
-1.41378	-1.98719	1
-1.6896	-1.52493	1
-2.14215	-2.56274	1
-2.45587	-2.66299	1
-2.2178	-2.54724	1
-1.84439	-2.85376	1
-1.4496	-4.24839	1
-1.75209	-3.70096	1
-1.83583	-3.43229	1
-1.7906	-4.19266	1
-1.97946	-4.215	1
0.760907	3.92905	2
6.37382	-3.11973	5
6.1595	-5.169	5
5.9116	-4.65907	5
4.92612	-7.44859	9
3.52115	-10.4422	4
2.98233	-12.0061	4
-80.4934	-28.1592	6
3.16729	-14.451	4
2.82144	-15.3702	4
2.95891	-14.9738	4
2.61778	-14.3741	4
7.3092	-4.74659	5
6.36168	-7.06287	9
6.8474	-4.78185	5
6.96906	-2.48963	5
6.01797	0.155861	5
4.73458	-0.07568	5
4.61487	1.52939	2
3.83677	1.96076	2
4.01391	1.60656	2
3.35101	3.37868	2
3.32496	2.88496	2
1.66776	3.21797	2
1.41248	3.27502	2
-0.48011	4.95459	7
-1.23734	5.21634	7
-2.27877	5.60753	7
-2.19047	5.65472	7
-1.84661	5.01786	7
-2.66521	6.06906	7
-3.77736	7.91082	7
-4.23007	8.59165	7
-4.65045	9.13218	8
-4.88686	9.20233	8
-3.90463	8.07084	7
-2.14733	5.16663	7
-3.21146	4.73478	3
-4.37984	2.98851	3
-3.5678	3.82939	3
-3.7622	5.045	3
-4.87523	2.06421	3
-4.84922	1.48779	3
-4.48331	1.2518	3
-5.56151	0.428026	3
-1.52747	3.60545	3
-5.55554	0.29468	3
-5.4989	0.307703	3
-5.25141	0.624563	3
-1.38934	1.61948	3
-0.796981	-4.13384	1
-1.53265	-2.0134	1
-1.93999	-3.00985	1
-2.1313	-3.5146	1
-1.80848	-3.7127	1
-1.36901	-4.21437	1
-1.95128	-0.739165	1
-1.70897	-1.95409	1
-1.46826	-3.66984	1
-1.7496	-2.96813	1
-1.58375	-4.08628	1
1.75218	2.60808	2
6.16062	-3.43706	5
6.45232	-4.04664	5
5.96012	-3.43265	5
5.11714	-7.10645	9
4.24196	-8.78063	9
3.66863	-9.68559	9
3.01075	-12.6227	4
3.16037	-13.2298	4
2.98437	-15.0715	4
2.53775	-15.2743	4
2.52275	-15.5211	4
6.19028	0.361857	5
6.41296	-6.91532	9
6.12007	-5.92804	9
5.82131	-3.64678	5
5.03847	-0.0572042	5
5.06198	-0.699268	5
4.46681	-0.0997503	5
3.85965	1.92456	2
2.91057	2.80253	2
4.67432	0.97373	2
2.35416	3.31703	2
0.622471	4.37581	2
0.478125	4.38859	2
0.526498	4.25599	2
-0.991333	5.08595	7
-1.39234	5.19048	7
-1.70379	5.2504	7
-2.07029	5.43931	7
-2.10756	4.8924	3
-2.74359	6.25669	7
-3.83576	8.03286	7
-5.45327	10.2942	8
-4.72305	9.66399	8
-3.81946	8.5455	7
-5.1707	9.32455	8
-5.36785	9.34966	8
-3.34141	7.66603	7
-4.03658	7.81673	7
-4.97582	2.1269	3
-3.43379	3.21198	3
-5.36223	1.67883	3
-5.48703	1.321	3
-4.6199	1.31774	3
-5.60812	0.488622	3
-1.343	4.18051	3
-5.44773	0.322928	3
-5.38928	0.390198	3
-4.45387	1.42566	3
-1.34037	-0.288064	1
-1.04809	-3.78578	1
-1.56614	-1.73335	1
-1.90212	-2.86767	1
-2.0552	-0.183066	1
-1.91523	-1.0403	1
-1.36419	-3.32917	1
-1.41962	-2.96549	1
-1.30954	-2.83967	1
-0.0166315	-5.08905	1
-1.77666	-3.6967	1
0.947509	3.52028	2
6.19118	-1.26245	5
6.56341	-3.83728	5
6.22135	-4.35864	5
5.98679	-5.86663	9
4.57872	-8.49692	9
3.9044	-8.91582	9
3.12568	-11.4422	4
2.84782	-13.779	4
3.15438	-14.526	4
2.9317	-14.3833	4
3.06137	-14.1487	4
6.45708	-1.20015	5
5.61292	-6.8975	9
5.8248	-6.03483	9
5.98825	-4.04073	5
5.32993	-1.17341	5
4.36836	0.223777	5
3.52999	0.66074	2
3.77525	1.91067	2
3.34644	2.05921	2
3.86075	1.49137	2
4.15935	1.06794	2
3.58769	1.9936	2
2.74191	1.71506	2
1.70627	3.14429	2
0.34413	4.33285	2
-0.620401	4.84431	7
-1.75349	5.31566	7
-1.86747	5.16261	7
-1.9725	2.21539	3
-2.53804	5.52925	7
-1.55775	5.57037	7
-4.62449	9.42726	8
-5.48558	10.2684	8
-5.65306	10.5459	8
-4.92801	10.0706	8
-5.56682	10.4521	8
-5.0476	8.99402	8
-5.86392	9.80913	8
-5.03277	8.38719	7
-2.12999	6.6804	7
-3.01556	5.47602	3
-5.42843	1.57594	3
-5.35784	1.41426	3
-4.61129	1.03205	3
-5.46061	0.584922	3
-4.4001	1.07563	3
-4.75703	0.811356	3
-5.47872	0.983369	3
-4.66106	1.22893	3
-0.728559	-2.78991	1
-1.08566	0.223041	2
0.795092	1.95652	2
-1.46016	-2.80666	1
-1.71103	-3.65162	1
-1.24472	-3.70765	1
-1.00235	-4.30856	1
-0.943052	-4.38894	1
-0.813969	-4.45427	1
-0.993108	-4.31414	1
1.30883	2.81077	2
5.84725	-0.165104	5
6.54751	-2.69233	5
6.10503	-2.94844	5
6.12447	-4.14698	5
5.50149	-5.29826	5
4.04954	-8.91312	9
3.28561	-10.326	4
3.09263	-11.9765	4
2.51068	-14.4116	4
2.93163	-14.8256	4
2.79663	-13.506	4
6.14	-1.34927	5
6.0071	-5.93603	9
5.33424	-6.21665	9
5.37344	-3.59807	5
4.23028	-0.28239	5
4.3331	-0.36878	5
4.38211	0.240543	5
4.02312	1.35489	2
4.783	0.147116	5
3.27981	1.54912	2
4.31335	0.485433	2
3.29313	1.61453	2
0.90897	3.80359	2
1.01166	3.3854	2
0.883831	3.76561	2
-0.646881	4.78295	7
-1.72224	5.39644	7
-1.37806	4.96178	7
-1.84001	5.07688	7
-1.83372	5.42636	7
-0.797318	5.0057	7
-3.32047	7.7662	7
-4.65304	9.4556	8
-5.89199	11.3104	8
-6.71551	11.9274	8
-6.70061	11.8051	8
-6.58304	11.4978	8
-5.39984	9.72924	8
-5.49105	9.48182	8
-5.38881	9.25938	8
-2.45999	4.59347	3
-2.62504	2.72398	3
-4.53655	1.95481	3
-5.47216	1.31181	3
-2.65025	3.14125	3
-4.56888	1.67089	3
-4.10076	1.98503	3
-4.4553	1.66453	3
-5.39816	1.30274	3
-0.273129	-0.0735298	2
-1.06408	1.92771	2
-1.07541	-0.0602311	1
-1.21695	-1.43362	1
-1.74039	-1.38224	1
-1.27753	-0.22421	1
-1.7996	-3.52377	1
-1.49713	-1.70044	1
-1.3199	-2.27695	1
-1.09921	0.486041	2
1.0356	3.48859	2
2.03657	2.27653	2
6.70655	-4.03328	5
6.216	-2.85189	5
5.99516	-4.72066	5
5.05439	-5.58092	9
4.80372	-6.67817	9
3.17823	-9.9534	9
2.73769	-12.3172	4
3.28701	-11.4499	4
2.54906	-14.0032	4
2.78884	-13.8642	4
3.25815	-5.77703	9
6.60577	-3.14766	5
5.62114	-5.52507	5
4.18477	-6.54439	9
5.23068	-3.62992	5
4.73065	-1.18372	5
5.09706	-2.08089	5
5.31251	-1.47233	5
4.66255	-1.03057	5
4.14026	0.460757	2
3.13767	1.96065	2
1.5537	4.16137	2
3.35344	0.82798	2
1.61969	2.54286	2
1.22341	1.69201	2
0.250391	4.13266	2
-1.65921	5.518	7
-2.31696	6.17386	7
-1.70773	5.38993	7
-1.63933	5.32078	7
-1.95497	5.61972	7
-2.26456	6.08231	7
-3.64405	7.89343	7
-3.38963	8.05718	7
-6.85871	11.8846	8
-5.83835	11.2723	8
-6.80714	11.9042	8
-5.44652	9.78731	8
-6.02198	10.3521	8
-6.09753	10.3646	8
-5.41548	9.35598	8
-4.26749	7.88185	7
-2.04807	6.57493	7
-2.65628	4.14818	3
-2.65741	3.46558	3
-3.25908	3.10822	3
-3.3122	3.01209	3
-4.19835	1.88229	3
-4.06938	1.94943	3
-3.96193	2.19909	3
-1.47027	0.848799	3
-0.220211	-0.177514	2
-0.88713	-0.834579	1
-1.06689	-2.6222	1
-1.09695	-1.56704	1
-1.34288	-3.47939	1
-1.18977	-3.83874	1
-0.219722	-4.68711	1
2.20921	-5.83619	9
1.91911	-5.31672	9
1.07176	0.291239	2
1.18687	3.29422	2
6.20966	-0.998473	5
6.57629	-2.8435	5
6.17494	-2.82959	5
5.80311	-3.40163	5
5.42888	-3.34474	5
4.43524	-6.1195	9
3.74762	-8.50647	9
3.3514	-10.4763	4
2.53313	-14.3793	4
2.69433	-14.6384	4
3.92674	-5.92353	9
6.67696	-3.17259	5
5.25179	-6.48503	9
5.13541	-4.18594	5
4.52917	-1.05681	5
4.69497	-1.17874	5
4.93759	-2.01211	5
4.34996	-1.04648	5
3.042	1.89379	2
1.40114	4.09026	2
-3.37881	8.78397	7
-3.99436	9.76566	8
1.84716	1.83064	2
1.70658	1.69854	2
1.28326	2.36223	2
0.62115	2.7156	2
0.416088	3.7814	2
0.0558909	3.58398	2
-1.78792	5.62096	7
-1.58155	5.52104	7
0.257712	4.47031	2
-1.83559	5.52845	7
-2.61369	6.55392	7
-2.58574	5.96222	7
-3.82622	7.65325	7
-5.35148	9.24278	8
-5.49711	9.7368	8
-6.96681	12.2716	8
-7.02081	12.0659	8
-6.35443	10.8712	8
-5.02878	8.45459	7
-3.07711	4.95193	3
-4.19314	6.75479	7
-2.92185	5.14453	3
-3.93597	6.81304	7
-2.60359	4.99403	3
-2.67555	2.67552	3
-3.32854	3.06806	3
-2.72906	2.59061	3
-2.63665	3.29652	3
0.296762	2.61552	2
-0.104106	0.00712999	2
-0.167515	-0.0712508	2
-1.02311	-1.26295	1
-0.954635	-2.40212	1
-1.19621	-3.22286	1
-1.37346	-2.96444	1
-1.15677	-1.29272	1
2.25499	-5.33896	9
3.05137	-5.93081	9
3.99191	-5.65819	9
1.06708	0.48581	2
1.61938	2.71604	2
6.3754	-1.59566	5
5.74724	-0.413593	5
5.58775	-1.97703	5
5.36577	-2.75277	5
4.4748	-6.71432	9
3.38015	-10.9072	4
3.02037	-12.5062	4
3.5553	-10.5862	4
2.80921	-13.7714	4
[truncated: 28,813 more rows]

## Sheet: Figure S10 D
V1	V2	clustergroup
-15.2778	0.895557	6
-15.761	1.49998	6
-16.8881	2.79208	6
-15.3534	1.88011	6
-15.5662	1.53877	6
-11.9041	0.338896	6
-11.0427	0.462941	7
-8.53729	-1.26949	7
-9.76922	-0.613778	7
-8.44203	-1.60986	7
-7.8962	-1.96433	7
-11.4474	0.123138	6
-10.0598	-0.298815	7
-11.0649	0.48644	6
-13.9424	0.612097	6
-12.3545	0.731421	6
-15.1253	1.48762	6
-15.065	1.54279	6
-15.1311	1.59427	6
-12.8186	1.66805	6
-14.4369	1.85378	6
-13.355	1.93547	6
-14.4413	1.49553	6
-14.9951	2.93201	6
-10.4632	1.19951	7
-10.1337	0.963869	7
-10.3103	1.22503	7
-7.27479	-0.504189	7
-14.1623	1.60674	6
-11.0693	0.783373	6
-7.19637	-4.06673	8
-7.77728	-2.23215	7
-8.97673	1.2982	7
-15.1312	3.44275	6
-15.3711	3.53747	6
-3.54837	-3.40693	8
-5.47797	-3.09552	8
-5.55839	-3.41116	8
-8.26533	-0.0508091	7
-8.58237	0.60159	7
-14.334	3.22404	6
-13.5208	2.83434	6
-6.31119	-1.77486	7
-7.85114	-0.604409	7
-7.98517	1.49784	7
-13.7752	2.89314	6
-14.5564	2.73341	6
-14.9374	2.74837	6
-13.1813	2.20399	6
-13.448	2.03179	6
-12.6636	0.805099	6
-13.3518	0.671594	6
-11.9741	0.396915	6
-11.5251	0.356288	6
-8.37034	-1.52585	7
-8.45778	-1.53377	7
-9.55559	-0.478491	7
-10.5291	0.0103545	7
-8.91167	-0.819686	7
-8.83394	-0.893802	7
-8.40512	-1.36816	7
-7.16248	-2.32943	7
-5.75925	-2.95961	8
-8.5616	-1.15139	7
-12.4473	0.448247	6
-13.5533	0.650744	6
-15.5381	1.66692	6
-16.2655	2.02985	6
-15.5864	1.97663	6
-15.44	1.64174	6
-14.523	2.03759	6
-14.5579	2.58209	6
-15.9428	2.59021	6
-16.1409	2.36524	6
-16.5237	2.7465	6
-16.2786	2.79446	6
-14.4702	2.08616	6
-9.16796	0.435302	7
-5.29818	-5.69409	8
-6.98885	-4.06783	8
-7.04543	-3.15938	7
-8.65964	1.43873	7
-8.58987	0.943292	7
-8.63157	0.895809	7
-16.6615	3.78354	6
0.446129	-0.628109	3
-14.7291	1.84027	6
-14.3886	1.79036	6
-14.8882	1.71528	6
-14.9214	1.99593	6
-13.1589	2.01243	6
-6.92839	-1.57481	7
-3.42853	-3.59158	8
-5.13619	-3.19403	8
-12.7723	2.59025	6
-14.22	3.11964	6
-14.3037	3.22785	6
-12.7337	2.62215	6
-6.96339	0.604224	7
-7.34693	1.47425	7
-7.31722	1.48331	7
-12.2548	2.33444	6
-10.1919	1.88827	7
-9.19598	1.57813	7
-11.6256	1.52123	6
-10.6255	0.593635	7
-12.8376	0.765641	6
-12.401	0.537515	6
-13.8418	0.508136	6
-12.157	0.220475	6
-10.3299	-0.439532	7
-10.2297	-0.412947	7
-10.0277	-0.363067	7
-10.3815	-0.453805	7
-10.3953	-0.879034	7
-8.62201	-1.28847	7
-9.34701	-0.646039	7
-9.62165	-0.469397	7
-9.45055	-0.551707	7
-7.97055	-1.76711	7
-9.93606	-0.368002	7
-11.9486	0.475363	6
-14.7675	0.995754	6
-13.1068	0.970778	6
-15.6853	1.5705	6
-13.2402	0.821566	6
-12.0599	0.864264	6
-15.0546	1.96229	6
-14.9255	2.12198	6
-14.8046	2.35621	6
-15.2278	2.28197	6
-15.5373	2.80236	6
-15.0102	2.27506	6
-12.7517	1.44925	6
-8.29516	-2.02942	7
-6.97419	-4.21065	8
-5.22298	-5.67563	8
-7.07769	-3.15042	7
-6.87482	-3.30724	7
-7.19875	-3.21953	7
-6.54168	-3.86673	8
-1.30744	-3.8188	3
1.16478	-0.659111	3
1.51858	2.61761	5
0.429217	4.36587	5
0.290723	4.78453	5
0.23194	4.7016	5
0.267889	4.86512	5
-0.0392634	4.10461	5
-0.232385	4.35564	5
-0.335408	4.01594	5
-0.0749559	4.11493	5
0.951051	4.43954	5
1.89351	3.80143	5
1.98413	3.58647	5
2.55755	4.3007	5
2.08633	2.09722	5
2.32418	1.66558	5
0.687649	-0.0591757	3
0.883445	-0.486104	3
0.455065	-1.36838	3
1.29417	-0.867377	3
0.426795	-1.55173	3
-0.618941	-1.10248	3
-0.597054	-0.956843	3
-0.289221	-0.107221	3
-0.57668	-1.02667	3
-0.561359	0.618402	5
-0.316477	-0.264893	3
-0.982739	-1.61954	3
-0.250579	0.463481	5
-16.5855	3.10281	6
-15.3995	2.21628	6
-13.5126	1.06485	6
-12.9132	1.68533	6
-13.3334	1.39236	6
-13.3884	1.64406	6
-13.5631	1.68143	6
-14.3133	1.54518	6
-15.0835	2.0974	6
-14.0832	1.72197	6
-12.792	2.53381	6
-6.62971	-1.2194	7
-12.7566	2.6076	6
-13.6424	2.95109	6
-13.8631	3.08879	6
-8.67839	1.51102	7
-9.43464	0.836771	7
-6.57986	-0.154417	7
-7.0255	0.189981	7
-6.32355	-0.789677	7
-8.62088	0.766109	7
-7.43771	1.55167	7
-8.08703	-0.461639	7
-7.98998	-1.30654	7
-10.6821	0.628261	7
-11.9633	0.433724	6
-12.0863	0.40371	6
-11.5815	0.712121	6
-11.107	-0.0200041	7
-10.525	-0.482291	7
-11.1774	-0.342823	7
-10.4945	-0.458347	7
-11.6036	-0.137102	6
-8.65838	-1.38075	7
-10.733	-0.28678	7
-10.5941	-0.0599373	7
-8.29914	-1.70557	7
-10.0513	-0.33225	7
-7.94294	-2.22561	7
-8.93007	-1.82942	7
-7.04954	-2.92848	7
-9.98399	0.236452	7
-8.84559	-1.05225	7
-14.7916	1.01353	6
-12.7356	0.663183	6
-7.18572	-2.37152	7
-11.6139	1.43425	6
-12.6361	1.62109	6
-13.9572	1.99942	6
-16.1122	2.61206	6
-15.6276	2.40945	6
-14.4958	2.28218	6
-9.01758	-1.85054	7
-8.81309	-1.73887	7
-9.74234	0.682659	7
-8.64141	0.0970614	7
-6.74158	-4.19085	8
-8.54454	0.739405	7
-7.74449	-2.33794	7
-7.53555	-3.38366	7
-7.75701	-2.3813	7
-14.7063	2.62588	6
-15.6358	1.99656	6
-1.75498	-5.36034	8
-0.362311	-4.93834	3
-0.0298858	-3.92776	3
-0.245782	-3.15141	3
1.65402	0.0583954	4
1.67453	3.47625	5
0.540616	4.66894	5
0.490951	4.98709	5
0.416137	4.61135	5
0.325004	4.92946	5
0.196345	5.0602	5
0.205805	4.67834	5
0.448259	4.9524	5
1.41773	4.85244	5
2.04286	4.83403	5
2.39321	4.48869	5
2.51389	4.39681	5
3.02989	3.209	5
2.94516	2.81378	5
2.72221	1.57283	5
2.70162	1.55528	5
2.62031	0.284249	4
2.19175	0.504122	4
2.10564	0.423969	4
1.62974	0.217057	4
1.52013	1.12869	5
1.17053	1.08045	5
1.10198	1.23913	5
1.07319	1.28677	5
1.09939	2.42361	5
1.17295	3.37553	5
1.06373	3.31132	5
1.33709	4.15111	5
0.821454	4.47365	5
0.411265	4.65071	5
0.351081	4.50232	5
0.198202	3.8987	5
0.169192	3.88795	5
0.209046	3.53394	5
-0.101521	2.30724	5
0.175552	2.13543	5
-0.469314	0.347646	3
-1.02375	-1.52534	3
-0.846136	-1.48418	3
-1.50429	-2.57292	3
-2.13826	-3.73712	8
-2.57001	-4.39353	8
-2.64962	-4.70866	8
-3.05752	-4.74402	8
-4.94588	-4.54917	8
-3.26933	-4.43215	8
-3.22047	-4.43403	8
-2.81155	-3.9523	8
1.80527	1.50608	5
2.58805	7.25696	5
1.66344	8.668	2
2.56764	7.23019	5
2.83517	6.99832	5
2.65811	5.27569	5
2.70987	3.44137	5
2.91321	4.31747	5
2.98862	3.90464	5
3.06839	3.74257	5
2.97573	5.71419	5
2.95327	3.90856	5
2.27392	7.67423	2
-16.8723	2.85343	6
-16.2121	2.38954	6
-16.6597	3.49137	6
-13.7787	2.47246	6
-15.0595	2.28772	6
-13.5254	2.0687	6
-13.3186	1.42813	6
-13.1111	1.53301	6
-13.367	1.55266	6
-15.025	2.00124	6
-14.5632	1.24511	6
-14.2372	1.62026	6
-15.2469	3.15754	6
-13.2605	2.75856	6
-8.42603	1.68311	7
-8.35722	0.409243	7
-6.15447	-1.351	7
-6.58215	-1.12056	7
-9.10051	0.808404	7
-11.5207	1.37073	6
-13.368	0.522488	6
-11.2845	0.343864	6
-9.58503	-0.945924	7
-8.33651	-1.31171	7
-11.3345	0.225017	6
-11.3481	0.154702	6
-9.98019	-0.315988	7
-10.4253	-0.295282	7
-9.58864	-0.997773	7
-9.06965	-1.62784	7
-9.35374	-1.00757	7
-11.4283	-0.152967	6
-9.58223	-1.00653	7
-8.0653	-2.48695	7
-7.41988	-2.84364	7
-8.67831	-1.53035	7
-7.85703	-2.25699	7
-8.84066	-1.40982	7
-9.03344	-1.28363	7
-8.52079	-1.66177	7
-8.13935	-2.76088	7
-7.39083	-3.36909	7
-7.80193	-2.3197	7
-9.12851	-0.63419	7
-7.76595	-1.88138	7
-10.3747	0.509241	7
-12.4163	0.634118	6
-10.6719	0.0491024	7
-13.3776	1.41852	6
-14.1097	1.76158	6
-14.5045	1.99043	6
-15.6654	2.23938	6
-15.6058	2.72336	6
-15.3661	1.94458	6
-14.0444	1.47869	6
-12.809	1.9042	6
-11.8298	0.96173	6
-12.9086	2.38915	6
-9.15554	1.33512	7
-8.58926	-2.00112	7
-8.64801	-1.37712	7
-7.19828	-3.90695	8
-6.03547	-4.64515	8
-13.4517	2.56769	6
-14.1345	1.43895	6
-13.9554	2.33998	6
0.682067	-4.7159	3
0.997295	-4.48176	3
0.522019	-4.87664	3
0.216566	-4.82319	3
-1.3522	-4.26764	3
0.157661	-3.01069	3
2.00559	-0.568791	4
2.22567	0.883445	5
0.36479	4.45007	5
0.748181	4.81299	5
0.159475	2.89169	5
0.245276	3.53732	5
0.239833	4.04466	5
0.102427	4.70334	5
0.281639	4.03189	5
0.950849	4.69676	5
1.69261	4.56755	5
2.12019	4.2487	5
2.58126	3.7143	5
2.73767	3.13094	5
2.79515	2.01205	5
2.72019	1.59295	5
2.39442	0.880746	5
2.3808	0.599198	4
2.24652	0.741549	5
1.61948	-0.0327146	4
1.25335	0.344569	5
1.17189	1.05499	5
1.36451	0.99647	5
1.17405	1.15572	5
1.10874	2.89606	5
1.12411	3.16081	5
0.873948	3.7766	5
0.394677	3.66342	5
0.439612	3.65979	5
0.510518	3.74903	5
0.271777	4.08538	5
0.183932	4.10803	5
-0.0183686	3.46609	5
0.0332817	3.25269	5
0.0213419	2.29964	5
-0.0817326	1.9824	5
-0.0661372	-0.115472	3
-0.733609	-1.10835	3
-0.783001	-1.41299	3
-0.582415	-1.73833	3
-2.04096	-3.56795	8
-2.70551	-4.30343	8
-3.1443	-4.49376	8
-3.09679	-5.13104	8
-3.54456	-4.99338	8
-3.37848	-4.45564	8
-3.31292	-3.85461	8
-1.3661	-2.85914	3
-0.526629	-0.632118	3
0.522911	0.581988	5
0.675256	0.853788	5
1.60177	1.90942	5
2.69133	2.07264	5
2.73884	3.62177	5
2.98747	5.78452	5
2.88406	3.75861	5
2.92906	4.14487	5
3.11943	3.88569	5
3.01809	3.60652	5
3.0216	5.47687	5
1.99026	8.39796	2
-16.4715	3.54885	6
-15.6365	2.4435	6
-15.6734	2.51105	6
-14.995	2.10457	6
-14.144	1.6221	6
-14.522	1.84626	6
-15.3497	1.94909	6
-13.1254	2.15754	6
-13.4132	1.69781	6
-14.2024	2.0443	6
-14.1964	2.12165	6
-13.8997	2.25243	6
-14.9437	2.20928	6
-15.93	2.7436	6
-16.489	3.40446	6
-15.4263	3.47162	6
-8.88378	1.46755	7
-11.6353	1.5802	6
-9.33763	-1.25192	7
-11.7176	0.847963	6
-12.3743	0.902147	6
-10.5407	0.256408	7
-14.7578	0.687593	6
-14.2873	0.441479	6
-14.1968	0.561416	6
-12.4562	0.0493767	6
-14.1679	0.56646	6
-11.1681	-0.105748	7
-8.32288	-1.46028	7
-8.5377	-1.72814	7
-9.06052	-1.77671	7
-8.18566	-2.84477	7
-9.20489	-2.01546	7
-8.39821	-2.40971	7
-8.15455	-2.55575	7
-8.95324	-1.96575	7
-10.1946	-0.92684	7
-9.1405	-1.77028	7
-8.14705	-2.78156	7
-6.43493	-3.60838	8
-7.931	-2.20556	7
-8.39691	-1.94528	7
-7.98329	-2.19126	7
-8.81669	-2.37432	7
-7.49322	-2.37666	7
-7.48916	-2.22299	7
-7.479	-2.66739	7
-7.93568	-1.83603	7
-8.95863	-0.736524	7
-8.92978	-0.57942	7
-10.956	0.719931	7
-12.9465	1.36134	6
-14.3127	1.43498	6
-14.7049	2.20548	6
-14.8236	2.7354	6
-11.2449	1.71579	6
-15.3435	1.91579	6
-14.2851	1.85465	6
-14.2246	1.96192	6
-9.75914	0.499777	7
-13.032	2.50703	6
-12.8282	2.51754	6
-9.15595	-1.1557	7
-7.16964	-3.5115	7
-7.17621	-3.0972	7
-13.0749	2.57195	6
-10.868	1.63835	6
-16.6039	3.68867	6
-7.32377	-0.334798	7
-9.97414	-1.65325	7
-7.48797	-3.74868	7
-0.311487	-5.77021	3
-0.268033	-5.65375	3
1.02958	-4.66688	3
0.27658	-5.07422	3
-0.536695	-5.46681	3
-0.35704	-5.42843	3
-0.892623	-4.09789	3
0.627155	-2.91336	3
2.49891	0.574828	4
1.62411	2.17894	5
0.562051	3.30682	5
0.381492	3.73789	5
0.145517	3.79193	5
0.0336312	3.71019	5
0.0308713	3.94409	5
0.054539	4.15838	5
0.425804	3.87827	5
1.78279	4.31971	5
2.1099	3.95478	5
2.05183	3.91901	5
2.84837	3.04485	5
2.719	2.59811	5
3.03776	0.703009	4
2.94679	0.638378	4
2.38708	0.963691	5
2.28588	1.15073	5
1.63142	0.175579	4
1.35951	0.438167	5
2.02597	1.24602	5
1.16223	1.27044	5
1.61535	1.69812	5
1.0921	2.46998	5
1.09431	3.14356	5
0.625858	2.97654	5
0.507575	3.555	5
0.261709	3.71496	5
0.433237	4.00612	5
0.323364	4.07938	5
0.0574701	3.91403	5
0.146408	3.96525	5
-0.0433054	3.10193	5
0.00985143	2.68807	5
0.177748	1.91482	5
-0.253049	-0.223708	3
-0.62228	-0.68026	3
0.123628	-0.569273	3
-0.315811	-1.1091	3
-1.08156	-3.31559	3
-1.60571	-3.95762	3
-2.40611	-4.2752	8
-1.41642	-4.98969	3
-1.31309	-4.95881	3
-0.43733	-4.15121	3
-2.26317	-3.8451	8
-0.548493	-1.59368	3
0.148023	-0.258651	3
0.585401	-0.396649	3
0.752207	0.486145	5
1.87254	2.374	5
2.86112	2.35884	5
3.99743	4.39056	5
3.41885	2.51338	5
3.20818	3.90346	5
3.17629	3.87302	5
3.09364	5.0313	5
3.16654	4.17298	5
2.79402	4.06953	5
2.24972	7.91218	2
2.75227	5.40759	5
-16.0916	1.8771	6
-14.2823	1.51186	6
-14.6284	1.25378	6
-15.796	1.74416	6
-14.0958	1.46071	6
-14.4529	1.81677	6
-14.7777	1.69561	6
-14.1319	1.3781	6
-15.7286	3.1404	6
-14.4335	1.52163	6
-14.7379	2.63876	6
-15.8083	2.86954	6
-16.1591	3.1423	6
-15.4983	2.7341	6
-16.288	2.91988	6
-15.0327	2.77121	6
-16.005	3.32199	6
-7.60009	-0.808884	7
-10.6844	0.757855	7
-6.77597	-2.89462	7
-11.5743	0.348762	6
-14.0194	0.560658	6
-10.6748	-0.180331	7
-10.6813	-0.35967	7
-12.5409	-0.0024838	6
-15.5355	1.07424	6
-16.4633	1.92354	6
-12.2131	0.0170864	6
-15.1639	0.831806	6
-9.60131	-0.851099	7
-12.517	-0.0500426	6
-14.6717	0.56084	6
-12.3936	-0.123205	6
-12.5486	-0.097088	6
-9.94507	-1.52994	7
-10.4823	-0.707255	7
-8.27559	-2.60329	7
-8.44686	-2.40516	7
-7.95725	-2.27003	7
-7.48512	-3.14277	7
-8.95922	-2.17763	7
-8.78386	-2.04688	7
-7.66329	-2.92718	7
-9.20556	-1.7852	7
-8.28321	-2.37702	7
-7.29568	-2.76564	7
-7.8965	-2.22671	7
-7.34205	-3.03222	7
-8.28815	-1.33981	7
-8.06816	-1.99559	7
-7.9296	-2.15631	7
-8.93069	-0.303409	7
-10.3269	0.982083	7
-9.56126	0.061029	7
-12.5529	1.66981	6
-14.4953	1.95279	6
-12.8792	1.7904	6
-14.3525	1.58157	6
-15.6197	2.83776	6
-14.6925	2.54492	6
-13.2372	2.42193	6
-12.9151	1.77485	6
-13.2566	2.31422	6
-10.4302	1.18186	7
-9.22633	0.362599	7
-7.12123	-3.18207	7
-8.63837	0.872307	7
-15.139	2.81678	6
-13.703	2.91159	6
-7.22474	-3.53707	7
-15.4932	1.93507	6
-7.57871	-2.47449	7
6.25068	-2.43551	4
1.47676	-4.97124	3
1.24572	-4.9021	3
-2.21081	-5.17304	8
-1.58202	-5.85998	8
0.376518	-5.14789	3
-1.11224	-5.05058	3
-1.47651	-3.68233	3
1.80267	-0.626038	3
2.18027	0.588971	4
0.955641	4.05379	5
0.684288	3.79477	5
0.78058	3.10175	5
-0.0240791	3.00999	5
-0.0119508	3.4004	5
-0.144768	3.56425	5
0.0373535	4.10469	5
0.955293	3.99721	5
1.21953	4.45934	5
2.03794	3.36584	5
1.94414	3.22668	5
2.21109	2.28238	5
2.25089	1.25657	5
2.23002	1.11351	5
2.091	1.28199	5
1.98368	1.49875	5
1.18753	0.909467	5
1.31003	1.13748	5
1.6146	1.8785	5
1.53	2.58337	5
1.38471	2.90998	5
1.41324	3.71956	5
1.16846	4.28255	5
1.32665	3.92629	5
0.472682	3.60346	5
0.531185	3.60903	5
0.625711	4.26086	5
0.00572329	4.49133	5
-0.0096286	3.51506	5
-0.240514	3.10219	5
0.0205956	2.19374	5
-0.158936	1.36505	5
-0.238333	0.15861	3
-0.668011	-0.968315	3
-0.839723	-1.23643	3
-0.78145	-1.35262	3
-0.761465	-1.97864	3
-1.71668	-3.53682	3
-1.65092	-3.81963	3
-1.10394	-4.39053	3
-1.32339	-4.62803	3
-2.69101	-4.37419	8
-2.79859	-4.28441	8
-2.18115	-3.94365	8
-1.38817	-3.04546	3
-0.513071	-2.28162	3
-0.112507	-1.23351	3
0.462227	-0.847197	3
1.21878	-0.5542	3
2.82793	1.70887	5
3.22045	0.27574	4
3.05994	1.45787	5
2.61559	3.28956	5
2.28597	1.89203	5
2.64882	3.09051	5
2.56247	3.16245	5
2.28824	3.1768	5
2.52893	6.21291	5
1.73118	2.19304	5
-16.1393	2.52806	6
-15.9308	2.07918	6
-15.9051	1.88664	6
-14.36	2.09067	6
-15.2309	1.94944	6
-14.2181	0.670686	6
-12.5944	0.0783089	6
-12.3575	0.218518	6
-14.9907	2.11601	6
-12.9143	2.03508	6
-8.79183	-0.46797	7
-10.6085	0.860315	7
-16.367	3.31942	6
-16.1443	3.29366	6
-16.8116	3.50271	6
-16.5845	3.46262	6
-16.2135	2.97386	6
-15.9794	2.77821	6
-9.96262	0.736552	7
-11.1941	0.167305	6
-8.59355	-0.905111	7
-15.3262	0.995349	6
-11.0839	-0.545465	7
-14.2923	0.403432	6
-13.5108	0.160928	6
-11.5168	0.0538573	6
-10.7258	-0.694604	7
-14.0444	0.351064	6
-16.6062	2.1174	6
-13.4066	0.116759	6
-9.83326	-0.938427	7
-12.3243	-0.132435	6
-15.301	0.977055	6
-12.1355	0.100396	6
-14.5102	0.485266	6
-13.4076	0.110821	6
-12.6844	-0.0313459	6
-13.9069	0.349184	6
-9.90262	-1.42639	7
-10.3254	-0.822462	7
-8.98039	-2.05424	7
-10.3672	-0.968519	7
-10.0344	-1.13772	7
-10.1566	-0.901248	7
-10.0763	-1.41242	7
-8.48733	-2.81151	7
-8.61269	-1.54186	7
-9.02047	-1.24695	7
-8.32687	-2.40517	7
-8.62163	-1.86607	7
-9.48187	-0.302028	7
-8.41459	-1.5039	7
-8.7275	-0.956469	7
-7.85535	-2.11367	7
-8.32875	-1.36306	7
-9.61181	0.730251	7
-9.12515	0.285873	7
-9.20496	0.282755	7
-14.6436	2.62382	6
-14.7183	2.65884	6
-15.2071	2.60657	6
-14.6845	2.58483	6
-13.0636	2.05271	6
-13.1471	2.1312	6
-10.059	0.843464	7
-7.5956	-3.24629	7
-7.62676	-2.44386	7
-8.18575	-2.15485	7
-15.0968	2.93408	6
-15.1997	2.55732	6
-15.2302	1.74568	6
-16.2115	3.30009	6
-10.9797	1.73746	6
3.85161	-3.56433	9
1.457	-5.03817	3
-1.82265	-5.33144	8
-0.673494	-5.56673	3
-2.75267	-5.32867	8
-2.01451	-5.27279	8
-2.16717	-5.2021	8
-1.34314	-4.4746	3
1.71652	-2.27926	3
1.55676	0.854818	5
2.08587	2.79837	5
1.56833	3.57268	5
0.953645	2.73848	5
0.361772	2.3681	5
0.12284	2.94262	5
0.0728021	3.79933	5
-0.0342809	4.11597	5
0.0726909	4.64586	5
0.480856	3.68407	5
0.882886	3.63142	5
1.97517	3.84323	5
1.94722	3.37235	5
2.23646	2.20489	5
2.14592	2.21632	5
1.88891	1.62757	5
1.41618	1.28808	5
1.25764	1.22382	5
1.71651	2.20854	5
1.77979	3.17403	5
1.8455	3.74744	5
1.60576	3.64875	5
1.43266	3.26579	5
1.25463	3.87852	5
0.991874	3.82685	5
1.08065	3.93504	5
0.643455	3.49353	5
0.536161	3.53539	5
0.0153939	4.87642	5
-0.0803593	3.48843	5
-0.144596	3.03984	5
-0.268538	1.51662	5
-0.0261321	1.44964	5
-0.478127	0.537584	5
-0.609947	-0.599913	3
-1.17516	-1.58972	3
-0.852483	-0.921837	3
-0.362335	-1.72905	3
-1.02713	-3.0128	3
-1.4404	-3.34546	3
-2.0665	-3.82558	8
-1.69186	-4.60036	8
-1.96499	-3.85489	8
-2.1305	-3.4938	8
-2.12576	-3.56534	8
-2.84504	-4.35455	8
-0.816305	-2.87632	3
-0.192471	-2.07288	3
-0.0870681	-2.08544	3
-0.0837525	-3.42529	3
2.71403	-0.745838	4
2.99377	-0.187711	4
2.47672	0.536376	4
1.97827	0.716855	5
2.60762	1.6459	5
2.08303	1.70392	5
2.48119	5.20875	5
2.115	2.96758	5
0.716151	0.834243	5
2.26834	4.68717	5
0.48978	-0.51425	3
-15.8297	1.56028	6
-16.6496	2.36807	6
-14.0333	0.329018	6
-12.3184	-0.122728	6
-10.0461	-1.30304	7
-8.49243	-2.88002	7
-7.15608	-3.8753	8
-7.02157	-3.99454	8
-5.97054	-4.41943	8
-5.59929	-4.46911	8
-6.11489	-4.23593	8
-5.55982	-4.28596	8
-8.19199	-2.08068	7
-15.3431	2.29977	6
-16.7122	3.57717	6
-16.888	3.42359	6
-16.5705	3.44814	6
-15.6494	2.80512	6
-12.392	1.76123	6
-10.2742	0.375301	7
-8.57375	-1.47989	7
-14.3078	0.667323	6
-14.6373	0.792265	6
-16.605	2.12658	6
-13.6378	0.211158	6
-12.0564	-0.148865	6
-14.3033	0.415551	6
-15.2847	0.910239	6
-10.5779	-0.603577	7
-12.2686	-0.147321	6
-16.5475	2.0418	6
-16.4491	1.94512	6
-12.4702	-0.080114	6
-9.59569	-1.82109	7
-10.1859	-1.32104	7
-10.8917	-0.722748	7
-15.1206	0.831997	6
-12.7456	-0.0121678	6
-12.7651	0.288362	6
-12.0298	0.439602	6
-10.5474	-0.928702	7
-10.8716	-0.416382	7
-10.4157	-1.32999	7
-9.56475	-1.73274	7
-10.5417	-0.806335	7
-11.0934	-0.543418	7
-8.76207	-2.09057	7
-11.5748	0.0150119	6
-10.7677	-0.606588	7
-9.39293	-1.24638	7
-8.31248	-2.34796	7
-8.91428	-2.2633	7
-6.64891	-3.95139	8
-7.37966	-2.99581	7
-8.78488	-0.392645	7
-7.77442	-2.93431	7
-8.01951	-2.4237	7
-10.4266	1.40453	7
-11.8113	1.87765	6
-10.9725	1.63128	6
-12.9563	2.46686	6
-14.9141	2.74917	6
-13.1025	2.51349	6
-16.065	2.85223	6
-13.2999	2.2338	6
-11.0162	1.55919	6
-9.66474	0.219835	7
-9.26009	0.434154	7
-10.5123	1.47448	7
-9.46835	1.06982	7
5.14073	-5.21598	9
5.05794	-4.92552	9
4.01717	-3.1765	9
0.922767	-4.9986	3
-1.91149	-5.6496	8
-5.95086	-2.61134	8
-5.97722	-2.47829	8
-2.33956	-5.48104	8
-3.17524	-5.71302	8
-2.80275	-5.32475	8
0.451781	-4.85745	3
0.132582	-3.84528	3
1.25414	1.03628	5
1.59835	2.14961	5
0.983441	0.799148	5
1.12455	1.22557	5
0.874125	2.00444	5
0.54725	2.65195	5
0.286702	3.48161	5
0.217888	3.72153	5
0.278092	4.06787	5
0.316385	3.65249	5
0.258081	3.73403	5
0.774759	3.24303	5
1.12963	3.06242	5
2.09437	2.45195	5
1.58107	1.78286	5
1.43626	0.865624	5
1.47018	1.08928	5
1.93509	2.05945	5
1.64247	2.39431	5
1.73278	3.20734	5
1.66529	3.51414	5
1.60229	3.59367	5
1.29858	3.79971	5
1.48891	3.52079	5
1.11098	4.70104	5
1.56691	4.61788	5
1.07694	3.89898	5
0.467251	3.74933	5
0.807317	4.76952	5
0.0419409	3.75676	5
0.0501716	2.47768	5
0.107879	1.82533	5
0.0391105	1.72849	5
-0.937669	-0.469908	3
-0.778406	-0.496837	3
-0.863423	-0.781711	3
-0.594859	-0.827923	3
-0.438672	-1.52878	3
-0.847954	-1.93573	3
-0.944947	-3.12169	3
-1.14709	-2.97865	3
-1.8388	-3.56872	8
-2.06368	-3.56455	8
-1.53157	-2.81405	3
-1.31662	-3.08882	3
-1.34826	-3.18272	3
-0.945879	-3.11682	3
0.883892	-2.14643	3
1.60486	-1.60801	3
2.42516	-0.742892	4
2.35916	-1.4321	3
2.96825	-0.070078	4
2.66124	3.17355	5
2.076	1.7803	5
2.05046	1.66454	5
2.01485	0.675741	5
2.30864	3.19259	5
1.87201	2.65395	5
1.84229	3.50578	5
1.70478	2.4841	5
-1.13584	-2.61012	3
-15.7437	1.87705	6
-15.0905	1.95375	6
-15.7563	2.2933	6
-16.3103	2.46766	6
-15.5163	1.82912	6
-14.2102	0.819345	6
-7.00882	-2.96561	7
-1.5923	-6.12691	8
-0.000421183	-7.67997	3
-0.30191	-6.71109	3
-2.42058	-6.29721	8
-3.61492	-5.2791	8
-2.37982	-6.27676	8
0.473218	-8.05444	3
-9.06835	-2.54884	7
-16.2301	2.63689	6
-16.0784	2.47684	6
-16.1723	2.95368	6
-15.6851	2.79593	6
-13.2845	2.16161	6
-9.69534	0.162717	7
-14.2866	0.584507	6
-13.7949	0.506128	6
-16.5538	2.06471	6
-15.8956	1.59139	6
-15.9635	1.63868	6
-12.3138	-0.142716	6
-15.171	0.830419	6
-13.3602	0.145527	6
-14.922	0.681503	6
-15.4598	1.03911	6
-13.168	0.142014	6
-12.937	0.0720396	6
-11.4894	-0.34023	6
-14.7073	0.586534	6
-15.1982	0.850436	6
-11.6019	-0.398604	6
-11.2666	-0.380934	7
-13.3997	0.235168	6
-14.248	0.43347	6
-10.3761	-0.830103	7
-10.5235	-0.824652	7
-10.7243	-0.556258	7
-10.6654	-0.322357	7
-11.3413	0.872983	6
-12.5085	0.726921	6
-10.4777	-0.753978	7
-11.2745	-0.313621	7
-10.3355	-0.723516	7
-9.32738	-1.19915	7
-9.40609	-0.48319	7
-8.50319	-2.02888	7
-9.23719	-1.54908	7
-8.22059	-2.73459	7
-8.16542	-2.42479	7
-8.54158	-2.06363	7
-8.6184	-1.72308	7
-9.5093	-1.34723	7
-9.29737	0.539458	7
-9.46424	0.524839	7
-11.1744	1.63781	6
-13.2096	2.44387	6
-13.2414	2.57116	6
-13.5703	2.71136	6
-14.995	2.82582	6
-13.3145	2.22265	6
-13.4211	2.50395	6
-10.069	-1.49304	7
-9.09703	-1.25124	7
3.39483	-2.78487	3
4.09271	-2.08003	4
3.51869	-2.79043	3
-3.46751	-5.92349	8
-2.32907	-5.60104	8
-5.76878	-2.89738	8
-7.59289	0.542132	7
-7.55623	2.0186	7
-6.30547	-2.47177	7
-5.74733	-3.52667	8
-3.09039	-5.7454	8
-1.10631	-5.25803	3
0.876759	-1.2089	3
1.70426	2.16168	5
1.45172	1.20815	5
-0.0397496	-1.59496	3
0.422683	-0.783048	3
1.68727	2.10878	5
0.821228	1.66765	5
0.207093	2.02268	5
0.0145354	3.0055	5
0.324811	3.84105	5
0.233956	3.49698	5
0.506593	3.53485	5
0.540107	3.66122	5
1.01552	3.08291	5
1.95933	2.13519	5
2.00943	2.21857	5
1.81393	1.8635	5
1.31455	1.19944	5
1.84452	3.23822	5
2.07683	3.6082	5
2.0495	3.58323	5
1.97401	3.53563	5
1.60021	3.90656	5
1.47828	3.62685	5
1.0937	3.01685	5
1.43417	4.36584	5
1.12644	4.67029	5
0.907382	4.47607	5
0.441432	3.86555	5
0.436108	3.86134	5
0.327873	3.4552	5
0.134196	2.58749	5
0.248442	1.88738	5
-0.449165	1.09876	5
-0.563077	0.695804	5
-0.601123	0.282661	3
-0.484744	0.385006	5
-0.559581	-1.02711	3
-0.83288	-1.91247	3
-0.808213	-1.73022	3
-0.864751	-1.89057	3
-1.21629	-3.18289	3
-1.3237	-2.62932	3
-1.57536	-2.70644	3
-1.19914	-2.66541	3
-1.0275	-2.88569	3
-0.803823	-2.77592	3
0.969493	-1.31531	3
0.935246	-1.32392	3
1.43943	-1.32668	3
1.62155	-2.21845	3
1.84435	-1.93925	3
3.33267	1.22214	4
3.03141	5.28369	5
3.13729	5.97701	5
2.97171	4.24957	5
2.49735	3.22342	5
2.22012	3.02747	5
2.4819	5.32619	5
1.79901	3.53585	5
0.688971	0.955585	5
-1.41273	-2.92166	3
0.272466	-4.1343	3
-17.0464	3.36393	6
-16.6472	3.05409	6
-16.8193	3.14565	6
-15.9064	2.67347	6
-15.4484	2.38045	6
-15.7427	2.23226	6
-15.2687	2.18758	6
-7.00594	-2.69333	7
-1.85302	-4.58063	8
-0.843793	-4.95032	3
1.79463	-4.65832	3
-3.07953	-2.25081	8
-1.21242	-5.51292	3
0.207986	-6.2664	3
0.372446	-6.85433	3
0.58565	-8.14164	3
-10.8981	-0.711257	7
-16.8655	2.96518	6
-15.2665	2.85658	6
-13.9631	2.51632	6
-13.4053	2.29329	6
-14.9621	1.51231	6
-17.0008	2.99477	6
-16.7309	2.47105	6
-16.7407	2.55328	6
-16.5559	2.09191	6
-14.9271	1.06558	6
-13.3581	0.286226	6
-13.7482	0.475744	6
-13.2172	0.155673	6
-13.9513	0.322552	6
-15.3012	1.14941	6
-16.4798	1.96497	6
-13.3857	0.219463	6
-15.4845	1.07752	6
-13.5324	0.175654	6
-14.5225	0.551708	6
-11.1799	-0.308527	7
-10.7131	-0.778784	7
-10.5134	-0.965249	7
-14.4242	0.705068	6
-14.7162	0.765638	6
-11.1485	-0.320184	7
-9.04205	-1.78888	7
-13.2449	0.889265	6
-12.8597	0.39991	6
-10.8888	-0.272702	7
-11.8025	0.0204473	6
-10.0464	-0.649113	7
-10.8101	-0.168722	7
-11.8318	0.152305	6
-11.2196	-0.561348	7
-9.37397	-0.785388	7
-9.73884	0.331241	7
-7.46024	-3.29174	7
-10.2057	0.163997	7
-7.53742	-3.42939	7
-8.71186	-2.25276	7
-9.74006	0.680224	7
-9.36995	1.43611	7
-9.3276	0.601154	7
-11.0003	1.75056	6
-11.2511	1.70439	6
-13.6842	2.46207	6
-13.8199	2.51652	6
-13.4262	2.2761	6
-13.4419	2.27611	6
-10.2215	0.209657	7
-5.09384	-3.91236	8
2.89088	-2.04178	3
4.98847	4.35767	5
5.40199	2.85105	4
5.25913	0.00397865	4
-3.47712	-6.05313	8
-2.14014	-5.71888	8
1.56103	-5.67674	3
1.49026	-5.43947	3
-10.0628	1.88215	7
-7.33563	0.421861	7
-0.735056	-5.035	3
0.304625	-1.77912	3
0.720113	-0.0929783	3
1.27129	0.905528	5
0.734522	-1.6855	3
0.808186	-1.31759	3
0.679297	-1.39703	3
1.20768	-0.274393	3
1.51673	1.44834	5
1.06131	2.48321	5
0.339469	2.44691	5
0.245636	2.49495	5
0.338399	3.03924	5
0.204869	2.84332	5
1.78805	2.53517	5
2.03203	2.21595	5
2.04402	2.16476	5
1.96509	2.09014	5
1.85538	1.57941	5
1.85176	2.56217	5
2.00395	3.37719	5
2.02803	2.25416	5
1.69114	2.6003	5
1.80882	3.26648	5
1.94023	3.79055	5
1.46337	3.31747	5
1.15685	2.95408	5
1.15424	3.80385	5
0.904901	3.80074	5
0.961848	3.83891	5
0.483585	3.57546	5
0.138267	3.67349	5
-0.125494	3.55748	5
0.0162588	2.56095	5
-0.228747	1.21209	5
-0.222677	1.2351	5
-0.559988	0.658778	5
-0.535952	0.323042	3
-0.425903	0.241761	3
0.0188141	-0.250812	3
-0.80393	-1.75737	3
-1.03466	-1.88289	3
-0.659088	-1.54122	3
-0.867584	-1.62971	3
-1.3598	-2.71812	3
-1.16868	-1.92189	3
-2.15631	-3.14986	8
-0.319028	-2.16564	3
-1.06881	-2.84437	3
0.840775	-0.747494	3
1.42742	-0.764516	3
1.87538	-1.29067	3
2.30712	-1.76892	3
2.17468	-1.54242	3
2.86363	0.772264	4
2.93109	3.10811	5
3.08833	5.2191	5
2.59779	7.30207	5
2.89811	6.34683	5
2.5771	3.39231	5
1.74561	2.49433	5
1.98323	3.02446	5
1.74355	2.51221	5
-1.5358	-4.27623	3
6.49551	-2.35137	4
-17.2336	3.69554	6
-17.0431	3.50777	6
-16.4077	2.89607	6
-16.442	2.84879	6
-15.673	2.49783	6
-15.4296	2.41962	6
-15.6412	2.41596	6
-13.0808	2.16188	6
-7.0022	-2.95838	7
-1.53369	-4.31479	3
-0.363858	-3.14582	3
4.26155	-2.65367	4
0.317855	-3.94095	3
0.349973	-6.50585	3
-0.0897494	-6.82947	3
1.36041	-8.3612	3
0.959196	-8.21021	3
-7.27354	-3.83374	8
-16.48	2.36557	6
-15.8704	2.27262	6
-15.6029	1.69686	6
-12.7472	1.60824	6
-16.3184	2.4161	6
-17.0424	3.27382	6
-17.0332	3.4104	6
-16.8569	2.83273	6
-14.9913	1.16417	6
-15.8648	1.6068	6
-13.2138	0.307276	6
-15.4296	1.06594	6
-15.3725	1.15186	6
-15.0612	0.968533	6
-13.8041	0.468236	6
-11.744	-0.00992056	6
-15.6408	1.38704	6
-13.4536	0.234837	6
-13.3567	0.0880784	6
-14.3896	0.512631	6
-16.4941	1.98706	6
-14.2805	0.403679	6
-11.1406	-0.510317	7
-12.5264	0.0139376	6
-10.2988	-1.2222	7
-10.5591	-0.987627	7
-10.4069	-0.96738	7
-10.6147	-0.784102	7
-12.4746	0.328646	6
-10.3609	-0.63462	7
-11.0533	0.608942	6
-11.9496	0.952792	6
-10.8589	0.0179371	7
-9.85743	-1.4671	7
-9.58844	-1.77845	7
-8.82831	-2.39623	7
-9.52518	-1.25751	7
-6.91739	-4.59073	8
-7.94731	-3.56766	7
-8.40357	-2.84734	7
-7.60125	-2.96239	7
-8.1923	-2.78586	7
-7.24219	-3.31708	7
-8.55768	-2.03363	7
-9.33021	0.567618	7
-11.6084	1.68295	6
-13.0496	2.19918	6
-13.7267	2.43433	6
-13.4314	2.02714	6
-10.1994	0.369198	7
-2.09795	-4.81561	8
-1.45076	-6.05542	8
5.31859	2.96572	4
4.85477	5.79258	5
4.97815	0.263569	4
4.53897	-5.71448	9
-2.85717	-4.78035	8
-1.00181	-3.61145	3
-0.792333	-3.23821	3
-0.712889	-2.55568	3
-0.627669	-3.18402	3
-0.474324	-3.16631	3
0.448729	-2.41234	3
0.329636	-1.48759	3
0.549363	-1.13346	3
1.03847	-1.04882	3
0.494203	-1.78027	3
0.661581	-1.71395	3
1.12983	-0.236761	3
1.4209	0.794152	5
1.06834	2.1576	5
0.915531	1.79699	5
0.637584	2.46416	5
1.99477	2.33107	5
2.05548	2.14707	5
2.32851	2.2299	5
2.03208	2.18319	5
2.01909	1.40064	5
1.92204	1.41395	5
1.91185	1.44166	5
1.79435	1.73277	5
0.127673	2.82656	5
0.102568	2.95499	5
0.490785	3.50612	5
1.52431	3.42117	5
1.86341	3.8848	5
1.62002	3.4985	5
1.17521	3.24138	5
1.32637	3.5672	5
-0.0995781	1.32545	5
0.889335	4.54945	5
0.391802	3.63282	5
-0.0331524	3.46157	5
0.120514	2.79957	5
0.0913884	2.7575	5
-0.199693	2.14045	5
-0.232584	1.06881	5
-0.564045	0.807246	5
-0.507279	0.59257	5
0.0913884	1.17863	5
0.362551	0.209611	3
-0.388183	-1.15907	3
-0.997065	-1.42701	3
-0.662236	-0.976728	3
-1.05343	-1.7222	3
-2.10068	-2.85908	8
-0.403327	-0.518329	3
-1.44991	-2.77465	3
-0.931834	-2.31278	3
0.846996	-1.06104	3
0.88811	-1.37141	3
1.8566	-1.33665	3
2.17221	-0.650511	4
2.02766	-2.15434	3
1.50567	-2.27077	3
3.02785	2.08222	5
2.90789	4.49809	5
3.07676	5.02225	5
2.64042	7.09788	5
1.94583	8.75029	2
2.84792	5.90259	5
2.48754	6.57433	5
2.47595	6.39743	5
1.80613	2.6028	5
-2.00674	-4.33079	8
1.98808	-5.27897	3
1.20369	-2.83435	3
-16.2373	2.68774	6
-17.3299	3.79677	6
-17.1992	3.68431	6
-16.4386	3.01647	6
-16.0939	2.59113	6
-15.2834	2.08548	6
-16.1432	2.38896	6
-15.5913	2.61087	6
-10.944	0.58051	7
-6.31252	-4.54687	8
-1.88915	-3.81496	8
3.82157	-2.49633	4
1.83497	-2.64089	3
-0.278511	-6.51775	3
-0.961699	-6.77683	3
0.642474	-8.06538	3
1.49542	-8.26098	3
1.23277	-6.8618	3
0.57277	-8.11436	3
-12.6288	0.119124	6
-16.3938	2.9017	6
-15.9341	2.35869	6
-16.0867	2.4067	6
-17.0537	3.44085	6
-17.0522	3.4454	6
-16.9937	3.48898	6
-16.3786	2.39665	6
-16.7237	2.48943	6
-16.4634	2.34572	6
-16.5152	2.30754	6
-16.0183	1.66903	6
-15.6181	1.55316	6
-14.2502	0.530712	6
-13.0763	0.0495608	6
-14.07	0.332761	6
-16.2821	1.86112	6
-13.3752	0.125444	6
-12.0328	-0.121205	6
-13.0782	0.0845954	6
-14.2651	0.39649	6
-15.3293	0.945481	6
-13.9196	0.306633	6
-14.1357	0.634496	6
-13.9809	0.364486	6
-12.1871	0.23267	6
-11.9984	0.449844	6
-11.5623	0.0245056	6
-11.37	0.0259165	6
-9.64471	-1.46946	7
-9.40696	-1.87821	7
-12.1594	0.606719	6
-13.6503	0.866336	6
-12.8701	0.478528	6
-12.1689	0.327782	6
-8.63543	-2.73972	7
-9.48364	-1.92999	7
-7.92658	-2.61453	7
-8.07449	-2.3785	7
-6.5581	-3.90728	8
-6.73521	-3.98436	8
-7.79136	-2.34982	7
-10.5085	0.864107	7
-11.581	1.65378	6
-11.5584	1.55773	6
-11.678	1.67598	6
-11.1928	1.46902	6
-9.76036	0.735868	7
-9.76678	-0.0723307	7
-2.42311	-5.51933	8
0.643084	-4.6968	3
5.47737	-0.617359	4
5.22101	4.60842	5
4.91743	0.272278	4
4.68761	-0.41018	4
2.68807	-4.23004	3
-0.560805	-3.16073	3
-0.839152	-4.1806	3
-0.394615	-4.43767	3
0.70102	-3.55116	3
1.01646	-3.6449	3
-1.21476	-5.25965	3
0.897385	-3.53632	3
1.0748	-1.41516	3
0.788786	-1.28968	3
0.378534	-2.55247	3
0.895535	-1.93857	3
1.5503	-0.735198	3
1.60754	-0.189203	4
1.54898	1.06855	5
0.956534	1.58312	5
0.848825	1.72159	5
1.68527	1.35428	5
2.2063	1.34563	5
2.03209	1.24732	5
1.70035	1.23305	5
1.35053	0.900352	5
1.80756	1.51739	5
1.53653	0.974381	5
0.302059	2.17382	5
0.189763	1.93022	5
0.469204	2.42028	5
0.589197	3.58275	5
0.356071	4.15312	5
1.62793	4.11402	5
2.02038	3.31792	5
1.83682	3.84676	5
1.50938	4.0983	5
0.911867	3.07412	5
0.842326	2.83964	5
0.201202	3.49338	5
0.0235627	3.02089	5
0.221677	3.44068	5
-0.130032	2.72308	5
-0.548364	0.490425	5
-0.264819	0.129605	3
-0.126788	1.51683	5
0.0772582	1.61317	5
-0.0587348	0.971533	5
0.584444	1.23631	5
0.203209	-0.150146	3
-0.678149	-0.916807	3
0.210136	-0.167075	3
-1.52931	-2.60778	3
-1.5593	-2.71071	3
-1.3376	-2.32732	3
-1.20498	-2.73992	3
-0.719095	-1.82296	3
0.761623	-0.839562	3
1.61869	-1.25494	3
1.79218	0.618822	5
2.13085	-1.61158	3
0.708434	-2.8593	3
1.32282	-2.43388	3
2.55825	2.89221	5
2.88278	3.20225	5
2.91622	5.99824	5
3.06334	5.29196	5
2.51654	7.87537	2
2.97264	5.68683	5
2.47799	6.51081	5
2.31272	5.23782	5
2.29199	4.59815	5
-0.518144	-3.61151	3
5.80156	-2.7991	9
-3.68737	-6.19599	8
-17.0371	3.52547	6
-17.0915	3.54179	6
-17.3158	3.77183	6
-17.2111	3.68012	6
-16.2994	3.00584	6
-16.769	3.13322	6
-16.1248	2.59248	6
-15.0927	2.00097	6
-14.9228	2.43987	6
-7.98987	-3.02704	7
-4.75664	-4.87592	8
-0.934925	-1.39458	3
3.19944	-1.57803	4
2.33735	-5.82817	3
-1.69729	-6.61391	8
-2.0609	-6.63678	8
-0.996872	-6.90374	3
-1.49506	-7.02209	8
0.926285	-7.78563	3
1.98825	-7.92156	9
-10.3275	-1.37773	7
-17.1088	3.55171	6
-17.2305	3.65293	6
-17.2701	3.87579	6
-17.3235	3.82724	6
-17.0614	3.44779	6
-16.9335	3.48433	6
-17.305	3.76257	6
-16.4646	2.77241	6
-16.0159	2.28152	6
-15.8515	1.92938	6
-15.1528	1.4633	6
-15.475	1.47815	6
-15.6766	1.57603	6
-15.8902	1.60334	6
-15.8965	1.65211	6
-12.8565	0.426489	6
-12.3552	-0.0833695	6
-10.5362	-0.81377	7
-14.2872	0.508115	6
-11.1843	-0.349726	7
-14.7061	0.699016	6
-11.3868	-0.463104	7
-11.712	-0.144076	6
-11.9623	-0.113494	6
-11.3428	0.0593899	6
-12.1418	-0.0890216	6
-11.0035	-0.0398336	7
-11.0786	-0.483014	7
-11.5235	-0.471472	6
-9.53539	-2.18869	7
-12.8029	0.768341	6
-10.3287	-1.48696	7
-11.9997	0.509616	6
-8.78267	-2.10312	7
-8.02903	-2.4313	7
-8.46685	-2.01923	7
-6.33282	-4.10687	8
-6.39765	-4.01855	8
-7.97973	-2.8142	7
-8.05422	-2.32944	7
-8.85944	-0.88071	7
-9.32803	-0.0794764	7
-11.1708	1.2709	6
-10.4594	0.843075	7
-10.3916	1.11319	7
-9.72469	0.380443	7
-7.56216	-2.16702	7
-7.22444	-2.48236	7
-1.15368	-5.39981	3
1.86383	-4.4596	3
5.11901	1.60696	4
5.25694	0.716662	4
5.09719	2.52262	4
3.68686	-1.67643	4
-1.52716	-4.14518	3
-1.21419	-4.15235	3
-1.91686	-4.9662	8
-1.52246	-4.58767	3
0.0668789	-4.33157	3
-0.908529	-4.3632	3
-0.733826	-4.14289	3
1.09358	-2.7934	3
1.07339	-1.99886	3
0.784262	-3.2318	3
1.11241	-3.13496	3
1.92161	-2.36702	3
1.57952	-0.490042	3
1.70141	0.0330492	4
1.54898	1.16542	5
1.24175	1.26831	5
1.43323	0.660879	5
2.02366	1.28479	5
1.55502	0.598829	5
1.49843	0.985376	5
1.90978	1.8768	5
1.82696	1.54643	5
1.60776	1.26694	5
1.59255	1.07312	5
1.51769	1.68438	5
0.500227	3.54462	5
1.42666	3.75765	5
0.4856	4.60204	5
1.65077	4.25597	5
1.93482	3.32062	5
1.81072	3.25726	5
1.56463	3.68791	5
0.946013	4.01688	5
0.316439	3.33927	5
0.130598	3.85046	5
0.451463	4.31693	5
0.236395	2.02722	5
-2.81474	-2.70112	8
-6.58105	1.32398	7
-6.60029	0.966466	7
-0.120385	1.11503	5
0.120266	2.28692	5
0.611685	1.49877	5
0.762451	1.4966	5
0.212959	-0.0239712	3
-0.49506	-0.901063	3
-0.639273	-0.960326	3
-0.869701	-1.55025	3
-1.34093	-2.26873	3
-1.2535	-2.5556	3
-0.596991	-2.57292	3
-0.570163	-2.34482	3
0.911401	-1.67345	3
1.79058	-1.73507	3
2.0908	-1.20305	3
0.544561	-3.76839	3
-0.451279	-3.6041	3
1.15074	-2.50316	3
2.51437	0.493398	4
3.20401	3.88853	5
2.66762	7.06784	5
1.88843	8.77879	2
1.04968	9.49993	2
2.71682	6.22838	5
2.52385	6.46888	5
1.64073	8.59742	2
2.28072	4.6731	5
0.171353	-1.96864	3
5.71733	-2.84424	9
-2.55528	-6.31401	8
-16.3479	2.28594	6
-17.3029	3.77434	6
-16.9516	3.3666	6
-17.3239	3.78352	6
-17.2741	3.74588	6
-17.0312	3.46577	6
-16.2841	2.77051	6
-15.941	2.68545	6
-15.263	2.36649	6
-14.0362	1.96143	6
-5.41714	-5.12802	8
-1.64188	-3.22917	3
-0.603072	-0.450025	3
3.03006	-2.08332	4
1.33503	-5.88266	3
-0.453981	-6.46573	3
-0.489153	-6.673	3
-2.01814	-6.47268	8
-1.94166	-6.84765	8
0.637625	-7.67511	3
-6.51698	-5.08479	8
-7.27754	-4.24682	8
-17.0288	3.38908	6
-17.0501	3.52572	6
-17.3106	3.82244	6
-16.8309	3.5881	6
-17.3158	3.8318	6
-17.1392	3.50566	6
-17.1171	3.50743	6
-17.0036	3.01317	6
-16.9798	2.93507	6
-14.3228	1.07834	6
-15.0998	1.2638	6
-14.9075	1.24492	6
-15.6043	1.59213	6
-15.7987	1.70163	6
-15.627	1.36684	6
-16.2676	1.95381	6
-15.0517	0.834233	6
-11.6998	0.192891	6
-15.2535	1.02896	6
-12.9977	0.291109	6
-15.0471	0.942274	6
-13.5684	0.589094	6
-12.4992	0.640637	6
-14.1278	1.1366	6
-10.9801	-0.061426	7
-9.0367	-2.26574	7
-10.1215	-1.59682	7
-10.1625	-1.53151	7
-10.93	0.706097	7
-10.1954	-1.56594	7
-12.1778	0.0793518	6
-11.4705	-0.424869	6
-9.74704	-0.757151	7
-8.72417	-1.48831	7
-7.3833	-3.17029	7
-5.86449	-4.32313	8
-8.1436	-1.71421	7
-8.04968	-1.5732	7
-8.24148	-1.44007	7
-7.91675	-1.7466	7
-8.40472	-0.730076	7
-10.0515	0.821302	7
-9.97446	0.714387	7
-9.37281	-0.0278474	7
-10.0977	0.162634	7
-8.9301	-0.845487	7
-2.36124	-5.5159	8
-1.34742	-4.61921	3
-2.3607	-5.33943	8
6.53347	-1.05443	4
2.07047	-3.62224	3
3.61263	-2.95073	9
4.53923	-2.09605	4
-1.93491	-3.68278	8
-2.56273	-3.96849	8
-4.57281	-4.49617	8
-1.72297	-4.92556	8
0.0606717	-4.01182	3
-1.15667	-4.92977	3
-1.70186	-4.72683	8
1.09892	-3.10149	3
1.79966	-2.43378	3
1.09853	-3.56317	3
1.23512	-2.76005	3
1.24251	-2.64765	3
1.74423	-2.75171	3
1.37163	-1.55422	3
1.36918	-0.537913	3
1.48319	-0.0901151	4
1.58967	-0.114336	4
1.57507	0.630273	5
1.25193	0.377162	5
1.44245	0.507237	5
2.00973	1.8521	5
2.07285	2.96784	5
2.04051	3.47664	5
2.09365	3.31543	5
2.00508	3.92715	5
2.34446	3.83777	5
1.89588	3.8924	5
2.14381	4.377	5
1.82784	3.28695	5
2.13599	4.15983	5
1.9298	3.6602	5
1.81518	3.59905	5
1.31437	4.07455	5
1.0665	3.05253	5
0.79424	2.95856	5
0.660963	3.04757	5
-4.19211	-2.35631	8
-5.44752	-0.298017	7
-7.24407	1.77565	7
-6.84933	1.44782	7
-0.709876	-0.756009	3
-0.220586	2.55459	5
0.156394	1.14573	5
0.535018	1.01263	5
0.70815	1.62629	5
-0.610453	-1.11087	3
-0.378931	-0.704278	3
-0.867996	-1.53517	3
-0.18591	-1.80493	3
-0.460818	-1.66399	3
-0.635697	-2.25716	3
-0.562509	-2.55176	3
0.0655959	-2.66556	3
1.78997	-0.830074	3
1.86797	-1.56786	3
-0.952268	-4.10437	3
-0.299525	-3.36258	3
2.37399	-0.782497	4
3.18744	1.25216	4
3.13896	5.05693	5
2.24048	8.55824	2
2.29068	8.54167	2
1.2994	9.41402	2
2.3114	8.02657	2
2.08251	7.93914	2
2.46678	6.34689	5
2.50499	6.30939	5
0.864037	-1.24856	3
1.05798	-5.44291	3
-2.69577	-6.22596	8
-17.2263	3.64473	6
-17.3143	3.77716	6
-17.3196	3.78466	6
-16.9191	3.34027	6
-16.5855	3.05813	6
-15.6984	3.07124	6
-14.4568	1.26645	6
-9.47304	0.252863	7
-3.6365	-4.76475	8
-1.5445	-2.57059	3
0.583695	0.752698	5
2.61699	-1.53554	4
2.40844	-5.78093	3
-0.871375	-6.65614	3
-1.82658	-6.20501	8
-0.796739	-6.81619	3
-3.60593	-6.3512	8
-0.949869	-7.15684	3
-0.108656	-7.61304	3
-7.21865	-4.32732	8
-15.5783	1.55683	6
-17.036	3.46072	6
-17.0104	3.61048	6
-16.8391	3.6232	6
-17.0038	3.53847	6
-17.3112	3.79411	6
-17.0397	3.43037	6
-15.4353	1.94231	6
-15.6449	2.42938	6
-16.8934	2.87296	6
-15.7273	1.57448	6
-15.6715	1.60631	6
-13.4103	0.819916	6
-15.7971	2.05309	6
-14.4514	1.14449	6
-15.2324	1.25218	6
-14.8274	0.835801	6
-15.8847	1.56188	6
-13.7631	0.919069	6
-13.1811	0.991544	6
-13.6275	0.862371	6
-13.4896	0.847515	6
-11.5869	0.00870668	6
-11.5459	-0.0190062	6
-13.3945	0.359052	6
-13.0124	0.452518	6
-12.8559	-0.0400789	6
-10.4753	-1.38984	7
-10.2971	-1.50746	7
-13.963	0.531969	6
-12.6966	0.20275	6
-11.4406	-0.476982	6
-8.54955	-2.14719	7
-8.05637	-2.10739	7
-8.1168	-1.18619	7
-8.66388	-0.919723	7
-7.91483	-1.52422	7
-6.34213	-2.73235	7
-7.75618	-2.17224	7
-9.11966	0.410316	7
-9.33205	-0.175259	7
-9.56612	0.593122	7
-9.80353	0.271801	7
-9.38994	-0.250498	7
-6.46945	-3.08679	8
-4.09996	-5.09759	8
-2.14463	-4.61869	8
-1.00561	-3.09192	3
-1.22311	-1.8069	3
-0.875319	-1.99526	3
-0.0768737	-3.42972	3
0.800744	-3.86874	3
-2.71973	-4.03663	8
-3.88954	-3.73638	8
-4.44829	-4.21712	8
-2.15014	-5.14663	8
-2.41481	-5.90739	8
-1.92004	-5.62747	8
-1.59005	-5.46893	8
0.358677	-4.42054	3
1.90447	-2.51613	3
2.21041	-0.950549	4
0.782396	-1.85273	3
0.949235	-2.05787	3
1.7052	-3.25565	3
1.70042	-2.50283	3
1.186	-1.53104	3
1.46795	-0.499355	3
1.33348	-0.857384	3
1.30173	-0.184156	3
1.68609	1.09164	5
2.37085	2.30963	5
2.20396	2.96966	5
2.14244	3.22424	5
1.95673	4.60513	5
1.85798	4.34019	5
2.06103	4.39178	5
1.77906	4.21435	5
1.84195	3.88592	5
1.91541	3.48524	5
2.13324	3.53154	5
1.86197	2.7161	5
2.05961	2.81176	5
1.69922	2.45587	5
0.21466	1.06713	5
0.323105	1.10983	5
0.89099	1.68931	5
-4.5799	-1.97101	8
-5.87103	0.432726	7
-5.72072	0.0794184	7
-7.23167	1.82413	7
-7.33186	1.78104	7
-1.23653	-1.36573	3
0.273696	1.95154	5
0.665411	1.61897	5
0.374808	1.19792	5
0.472497	1.36912	5
0.325126	-0.5372	3
-0.604353	-1.3423	3
-0.80804	-1.59153	3
-0.198136	-1.52786	3
-0.4012	-1.69829	3
-0.183592	-1.80043	3
1.2352	-0.93504	3
0.514708	-2.34331	3
1.40416	-0.859912	3
1.77839	-1.75219	3
-0.495952	-3.57002	3
-0.441735	-3.30374	3
3.18619	1.06513	4
4.06217	2.74496	5
[truncated: 55,452 more rows]
